# Supplementary material
Source: PubMed Central journal article supplement (PMC5817971)
Supplement: jama-318-1460-s001.pdf [file jama-318-1460-s001.pdf]

**This supplement contains the following items;**

1. Original protocol, final protocol, summary of changes
2. Final statistical analysis plan (one version no further amendments made)

## **Table of contents**

Original protocol: page 3

Final protocol: page 101

Protocol amendment 1: page 199

Protocol amendment 2: page 203

Protocol amendment 3: page 211

Final statistical analysis plan: page 215

Protocol  
Trial ID: NN9924-3790  
UTN: U1111-1136-4716  
EudraCT No.: 2012-004994-16

~~CONFIDENTIAL~~

Date:  
Version:  
Status:  
Page:

25 June 2013  
1.0  
Final  
1 of 98

**Novo Nordisk**

## Protocol

**Trial ID: NN9924-3790**

**Original protocol**

*Multiple dose trial examining dose range, escalation and efficacy of oral semaglutide in subjects with type 2 diabetes*

*Redacted protocol  
Includes redaction of personal identifiable information only.*

**Trial phase: 2**

**Protocol originator:**

[REDACTED]

Clinical Operations, GLP-1 & Obesity

This ~~confidential~~ document is the property of Novo Nordisk. ~~No unpublished information contained herein may be disclosed without prior written approval from Novo Nordisk. Access to this document must be restricted to relevant parties.~~

## Table of contents

|                                                                   | <b>Page</b> |
|-------------------------------------------------------------------|-------------|
| <b>Table of contents</b> .....                                    | <b>2</b>    |
| <b>Table of figures</b> .....                                     | <b>6</b>    |
| <b>Table of tables</b> .....                                      | <b>6</b>    |
| <b>List of abbreviations</b> .....                                | <b>7</b>    |
| <b>1 Summary</b> .....                                            | <b>10</b>   |
| <b>2 Flow chart</b> .....                                         | <b>13</b>   |
| 2.1 Flow chart foot notes .....                                   | 16          |
| <b>3 Background information and rationale for the trial</b> ..... | <b>17</b>   |
| 3.1 Type 2 diabetes mellitus and glucagon-like peptide-1.....     | 17          |
| 3.2 Semaglutide and SNAC .....                                    | 17          |
| 3.2.1 Nonclinical data .....                                      | 18          |
| 3.2.1.1 Thyroid C-cell tumours in rodents .....                   | 19          |
| 3.2.1.2 Teratogenicity in rats.....                               | 19          |
| 3.2.1.3 SNAC toxicology .....                                     | 19          |
| 3.2.2 Nonclinical pharmacology and pharmacokinetics .....         | 20          |
| 3.2.3 Clinical data .....                                         | 21          |
| 3.2.3.1 Data from literature .....                                | 21          |
| 3.2.3.2 Clinical data of s.c. semaglutide.....                    | 21          |
| 3.2.3.3 Clinical data of oral GLP-1 .....                         | 23          |
| 3.2.3.4 Clinical data of SNAC.....                                | 23          |
| 3.3 Risks and benefits of the trial .....                         | 24          |
| 3.4 Rationale for the trial .....                                 | 25          |
| <b>4 Objective(s) and endpoint(s)</b> .....                       | <b>26</b>   |
| 4.1 Objectives .....                                              | 26          |
| 4.1.1 Primary objective .....                                     | 26          |
| 4.1.2 Secondary objectives .....                                  | 26          |
| 4.2 Endpoints .....                                               | 26          |
| 4.2.1 Primary endpoint.....                                       | 26          |
| 4.2.2 Supportive secondary endpoints .....                        | 26          |
| <b>5 Trial design</b> .....                                       | <b>28</b>   |
| 5.1 Type of trial .....                                           | 28          |
| 5.2 Rationale for trial design.....                               | 29          |
| 5.3 Treatment of subjects.....                                    | 29          |
| 5.3.1 Dose levels and escalation regimen for oral dosing.....     | 30          |
| 5.3.2 Dose levels and escalation regimen for s.c. dosing.....     | 30          |
| 5.4 Treatment after end of trial .....                            | 31          |
| 5.5 Rationale for treatment .....                                 | 31          |
| <b>6 Trial population</b> .....                                   | <b>32</b>   |
| 6.1 Number of subjects .....                                      | 32          |
| 6.2 Inclusion criteria .....                                      | 32          |



|          |                                                                |           |
|----------|----------------------------------------------------------------|-----------|
| 6.3      | Exclusion criteria .....                                       | 32        |
| 6.4      | Rescue criteria.....                                           | 33        |
| 6.5      | Withdrawal criteria and discontinuation of trial product ..... | 34        |
| 6.5.1    | Withdrawal from trial .....                                    | 34        |
| 6.5.2    | Discontinuation of trial product.....                          | 34        |
| 6.6      | Rationale for trial population.....                            | 35        |
| <b>7</b> | <b>Milestones .....</b>                                        | <b>36</b> |
| <b>8</b> | <b>Methods and assessments .....</b>                           | <b>37</b> |
| 8.1      | Visit procedures .....                                         | 37        |
| 8.1.1    | Introduction.....                                              | 37        |
| 8.1.2    | Visit 1 (Screening).....                                       | 37        |
| 8.1.3    | Fasting visits .....                                           | 38        |
| 8.1.4    | Unscheduled visits .....                                       | 38        |
| 8.1.5    | Visit 2 (Randomisation).....                                   | 38        |
| 8.1.6    | Visit numbers.....                                             | 39        |
| 8.1.7    | Visits 3-10 (Treatment).....                                   | 39        |
| 8.1.8    | Visits 11-12 (End-of-treatment and Follow-up) .....            | 39        |
| 8.1.9    | Visit 11X (End-of-Trial – premature discontinuation) .....     | 39        |
| 8.1.10   | Withdrawals.....                                               | 40        |
| 8.1.11   | Investigator’s assessment.....                                 | 40        |
| 8.2      | Subject related information.....                               | 41        |
| 8.2.1    | Concomitant illness and medical history .....                  | 41        |
| 8.2.2    | Concomitant medication .....                                   | 41        |
| 8.2.3    | Demography .....                                               | 42        |
| 8.2.4    | Diagnosis of diabetes .....                                    | 42        |
| 8.2.5    | Diabetes treatment history .....                               | 42        |
| 8.2.6    | History of gallbladder disease.....                            | 42        |
| 8.2.7    | History of cardiovascular disease .....                        | 42        |
| 8.2.8    | Renal impairment history.....                                  | 42        |
| 8.2.9    | Post-dose fasting routines .....                               | 43        |
| 8.3      | Assessments for efficacy .....                                 | 43        |
| 8.3.1    | Blood samples.....                                             | 43        |
| 8.3.2    | Body measurements.....                                         | 43        |
| 8.3.3    | Patient reported outcomes.....                                 | 44        |
| 8.4      | Assessments for safety.....                                    | 45        |
| 8.4.1    | Hypoglycaemic episodes .....                                   | 45        |
| 8.4.2    | Blood samples.....                                             | 45        |
| 8.4.3    | Pregnancy test.....                                            | 46        |
| 8.4.4    | Urinalysis.....                                                | 47        |
| 8.4.5    | Antibodies.....                                                | 47        |
| 8.4.6    | Vital signs .....                                              | 47        |
| 8.4.7    | Electrocardiogram – 12-lead.....                               | 47        |
| 8.4.8    | Fundoscopy/fundus photography.....                             | 48        |
| 8.4.9    | Physical examination .....                                     | 48        |
| 8.4.10   | Pharmacokinetics .....                                         | 49        |
| 8.4.11   | Calcitonin.....                                                | 50        |
| 8.5      | Laboratory assessments .....                                   | 50        |

|           |                                                                       |           |
|-----------|-----------------------------------------------------------------------|-----------|
| 8.6       | Other assessments .....                                               | 51        |
| 8.6.1     | Subject diary .....                                                   | 51        |
| 8.6.2     | Additional safety assessments .....                                   | 51        |
| 8.6.2.1   | Thyroidectomy, tissue sample and genetic testing .....                | 51        |
| 8.6.2.2   | Assessments in case of suspicion of acute pancreatitis .....          | 52        |
| 8.6.2.3   | Assessments in case of suspicion of severe hypersensitivity .....     | 53        |
| 8.7       | Subject compliance .....                                              | 53        |
| <b>9</b>  | <b>Trial supplies .....</b>                                           | <b>54</b> |
| 9.1       | Trial products .....                                                  | 54        |
| 9.2       | Labelling .....                                                       | 55        |
| 9.3       | Storage .....                                                         | 55        |
| 9.4       | Drug accountability and destruction .....                             | 56        |
| 9.5       | Auxiliary supplies .....                                              | 56        |
| <b>10</b> | <b>Interactive voice/web response system .....</b>                    | <b>57</b> |
| <b>11</b> | <b>Randomisation procedure and breaking of blinded codes .....</b>    | <b>58</b> |
| 11.1      | Breaking of blinded codes .....                                       | 58        |
| <b>12</b> | <b>Adverse events, technical complaints and pregnancies .....</b>     | <b>59</b> |
| 12.1      | Definitions .....                                                     | 59        |
| 12.2      | Reporting of adverse events .....                                     | 62        |
| 12.3      | Follow-up of adverse events .....                                     | 65        |
| 12.4      | Technical complaints and technical complaint samples .....            | 66        |
| 12.4.1    | Reporting of technical complaints .....                               | 66        |
| 12.4.2    | Collection, storage and shipment of technical complaint samples ..... | 67        |
| 12.5      | Pregnancies .....                                                     | 67        |
| 12.6      | Precautions and/or overdose .....                                     | 68        |
| 12.7      | Committees related to safety .....                                    | 69        |
| 12.7.1    | Novo Nordisk safety committee .....                                   | 69        |
| 12.7.2    | Event adjudication committee .....                                    | 69        |
| 12.7.3    | Calcitonin monitoring committee .....                                 | 71        |
| <b>13</b> | <b>Case report forms .....</b>                                        | <b>72</b> |
| 13.1      | Corrections to case report forms .....                                | 72        |
| 13.2      | Case report form flow .....                                           | 72        |
| 13.3      | Paper case report forms .....                                         | 73        |
| <b>14</b> | <b>Monitoring procedures .....</b>                                    | <b>74</b> |
| <b>15</b> | <b>Data management .....</b>                                          | <b>75</b> |
| <b>16</b> | <b>Computerised systems .....</b>                                     | <b>76</b> |
| <b>17</b> | <b>Statistical considerations .....</b>                               | <b>77</b> |
| 17.1      | Sample size calculation .....                                         | 77        |
| 17.2      | Definition of analysis sets .....                                     | 78        |
| 17.3      | Primary endpoint .....                                                | 78        |
| 17.4      | Supportive secondary endpoints .....                                  | 79        |
| 17.4.1    | Efficacy endpoints .....                                              | 79        |
| 17.4.2    | Safety endpoints .....                                                | 80        |
| 17.4.3    | Pharmacokinetics and/or pharmacodynamics modelling .....              | 83        |

|           |                                                                                                   |           |
|-----------|---------------------------------------------------------------------------------------------------|-----------|
| <b>18</b> | <b>Ethics</b> .....                                                                               | <b>84</b> |
| 18.1      | Informed consent .....                                                                            | 84        |
| 18.2      | Data handling .....                                                                               | 85        |
| 18.3      | Premature termination of the trial and/or trial site .....                                        | 85        |
| <b>19</b> | <b>Protocol compliance</b> .....                                                                  | <b>86</b> |
| <b>20</b> | <b>Audits and inspections</b> .....                                                               | <b>87</b> |
| <b>21</b> | <b>Critical documents</b> .....                                                                   | <b>88</b> |
| <b>22</b> | <b>Responsibilities</b> .....                                                                     | <b>90</b> |
| <b>23</b> | <b>Reports and publications</b> .....                                                             | <b>92</b> |
| 23.1      | Communication of results .....                                                                    | 92        |
| 23.1.1    | Authorship .....                                                                                  | 93        |
| 23.1.2    | Site-specific publication(s) by investigator(s) .....                                             | 93        |
| 23.2      | Investigator access to data and review of results .....                                           | 93        |
| <b>24</b> | <b>Retention of clinical trial documentation and human biospecimens</b> .....                     | <b>94</b> |
| 24.1      | Retention of clinical trial documentation .....                                                   | 94        |
| 24.2      | Retention of human biospecimens .....                                                             | 94        |
| <b>25</b> | <b>Institutional Review Boards/Independent Ethics Committees and regulatory authorities</b> ..... | <b>95</b> |
| <b>26</b> | <b>Indemnity statement</b> .....                                                                  | <b>96</b> |
| <b>27</b> | <b>References</b> .....                                                                           | <b>97</b> |

**Appendix A – Monitoring of calcitonin**

**Appendix B – PRO questionnaire**

**Appendix C – Medical Events of Special Interests (MESI)**

**Attachment I – Global List of key staff and relevant departments**

**Attachment II – Country List of key staff and relevant departments**

## Table of figures

|                                                                             | <b>Page</b> |
|-----------------------------------------------------------------------------|-------------|
| Figure 5–1 Trial design of NN9924-3790.....                                 | 28          |
| Figure 5–2 Dosing and fasting conditions for oral treatment (arms 1-8)..... | 30          |
| Figure 12–1 Initial reporting of AEs.....                                   | 64          |
| Figure 17–1 ADA classification of hypoglycaemia.....                        | 82          |

## Table of tables

|                                                      | <b>Page</b> |
|------------------------------------------------------|-------------|
| Table 9–1 Trial products (IMP).....                  | 54          |
| Table 9–2 Storage conditions for trial products..... | 55          |

## List of abbreviations

|                   |                                    |
|-------------------|------------------------------------|
| ADA               | American Diabetes Association      |
| AE                | adverse event                      |
| ANCOVA            | analysis of covariance             |
| AUC               | area under the curve               |
| BMI               | body mass index                    |
| CMC               | calcitonin monitoring committee    |
| CRF               | case report form                   |
| CT                | computerised axial tomography      |
| CTR               | clinical trial report              |
| CVD               | cardiovascular disease             |
| DFU               | directions for use                 |
| DPP-4             | dipeptidyl peptidase-4             |
| DUN               | dispensing unit number             |
| EAC               | event adjudication committee       |
| ECG               | electrocardiogram                  |
| eCRF              | electronic case report form        |
| EDC               | electronic data capture            |
| EE                | ethinylestradiol                   |
| EMA               | European Medicines Agency          |
| eSIF              | electronic safety information form |
| FAS               | full analysis set                  |
| FDA               | Food and Drug Administration       |
| FPG               | fasting plasma glucose             |
| FSFV              | first subject first visit          |
| GCP               | Good Clinical Practice             |
| GI                | gastrointestinal                   |
| GLP-1             | glucagon-like peptide-1            |
| HbA <sub>1c</sub> | glycosylated haemoglobin           |

|         |                                                    |
|---------|----------------------------------------------------|
| hCG     | human chorionic gonadotropin                       |
| HDL     | high density lipoprotein                           |
| HOMA-B  | homeostasis model assessment of beta-cell function |
| HOMA-IR | homeostasis model assessment of insulin resistance |
| IB      | Investigator's Brochure                            |
| ICMJE   | International Committee of Medical Journal Editors |
| IEC     | independent ethics committee                       |
| IMP     | investigational medicinal product                  |
| IRB     | Institutional Review Board                         |
| IV/WRS  | interactive voice/web response system              |
| LDL     | low density lipoprotein                            |
| LN      | levonorgestrel                                     |
| LOCF    | last observation carried forward                   |
| LSFV    | last subject first visit                           |
| MD      | multiple dose                                      |
| MedDRA  | Medical Dictionary for Regulatory Activities       |
| MEN2    | multiple endocrine neoplasia type 2                |
| MESI    | medical event of special interest                  |
| MMRM    | mixed model for repeated measurements              |
| MRI     | magnetic resonance imaging                         |
| NOAEL   | no observed adverse effect level                   |
| NYHA    | New York Heart Association                         |
| OAD     | oral antidiabetic drug                             |
| OD      | once-daily                                         |
| OW      | once-weekly                                        |
| PD      | pharmacodynamics                                   |
| PK      | pharmacokinetics                                   |
| PRO     | patient reported outcome                           |
| SAE     | serious adverse event                              |

|            |                                                                          |
|------------|--------------------------------------------------------------------------|
| SAP        | statistical analysis plan                                                |
| s.c.       | subcutaneous                                                             |
| SD         | standard deviation                                                       |
| SF-36      | medical outcomes study 36-item short-form health survey                  |
| SIF        | safety information form                                                  |
| SNAC       | sodium N-[8-(2-hydroxybenzoyl) amino] caprylate /<br>salcaprozate sodium |
| SUSAR      | suspected unexpected serious adverse reaction                            |
| T2D        | type 2 diabetes                                                          |
| TEAE       | treatment emergent adverse events                                        |
| $t_{\max}$ | time to maximal concentration                                            |
| TMM        | Trial Materials Manual                                                   |
| USP        | United States Pharmacopeia                                               |
| UTN        | Universal Trial Number                                                   |
| VLDL       | very low density lipoprotein                                             |

# 1 Summary

## Objectives and endpoints:

### Primary objective

- To compare the efficacy on glycaemic control of oral semaglutide in a SNAC formulation against placebo in subjects with T2D

### Key secondary objectives

- To compare the efficacy on glycaemic control of oral semaglutide in a SNAC formulation against s.c. semaglutide in subjects with T2D
- To compare the safety and tolerability of three dose escalation schemes using a single end dose level during 26 weeks administration of oral semaglutide and SNAC in a tablet formulation in subjects with T2D

### Primary endpoint

- Change in HbA<sub>1c</sub> from baseline to after 26 weeks of treatment

### Key secondary endpoints

- Subjects who, after 26 weeks of treatment, achieve (yes/no) HbA<sub>1c</sub> <7% (53 mmol/mol)
- Change in body weight from baseline to after 26 weeks of treatment
- Change in waist circumference from baseline to after 26 weeks of treatment
- Change in body mass index (BMI) from baseline to after 26 weeks of treatment
- Number of treatment emergent adverse events (TEAEs) recorded from baseline until week 31
- Number of confirmed hypoglycaemic episodes recorded from baseline until week 31

### Trial design:

This is a randomised, partially-blinded, multiple-dose, multicentre trial with a total of nine treatment arms; seven oral semaglutide treatment arms, an oral placebo arm and an s.c. semaglutide arm in a parallel design. The trial will include subjects with T2D who have failed on diet and exercise and/or metformin.

Subjects with T2D will be randomised in an equal manner with 67 subjects planned to be randomised per treatment arm. Treatment arms 1-8 will include once-daily dosing of a tablet and will be blinded. Treatment arm 9 features once-weekly s.c. injection. All arms include 26 weeks of treatment and a 5 week follow-up period.

The trial medication will be add-on to previous metformin therapy or as monotherapy in the case where the subject is treated with diet and exercise alone.



### **Trial population:**

A total of 603 subjects with T2D will be randomised.

#### Key inclusion criteria:

- Male or female, age  $\geq 18$  years at the time of signing informed consent
- BMI  $\geq 25$  and  $\leq 40$  kg/m<sup>2</sup>
- Subjects diagnosed with T2D treated with diet and exercise and/or who have been on a stable dose of metformin for at least 30 days prior to screening
- HbA<sub>1c</sub> 7.0-9.5% (53-80 mmol/mol) (both inclusive)

#### Key exclusion criteria

- Subjects on selected oral medication with a narrow therapeutic window, such as warfarin, digoxin, tricyclic antidepressants, lithium, aminophylline, theophylline and anticonvulsants
- History of chronic pancreatitis or idiopathic acute pancreatitis
- Chronic malabsorption, regardless of aetiology
- History of Crohn's disease, ulcerative colitis, or other inflammatory bowel disease
- Treatment with glucose lowering agent(s) other than metformin as stated in the inclusion criteria in a period of 90 days before the screening visit

### **Assessments:**

#### *Efficacy assessment*

Measurements of laboratory parameters (HbA<sub>1c</sub>, glucose metabolism parameters and lipids), BMI and waist circumference. Patient reported outcomes will be based on the SF-36 questionnaire and assessed at baseline and end of treatment.

#### *Safety assessment*

Adverse events, laboratory safety variables (haematology, biochemistry, calcitonin and urinalysis), vital signs, electrocardiograms, physical examinations and hypoglycaemic episodes recorded from the first trial-related activity and until completion of the post treatment follow-up visit of the trial.

#### *PK assessment*

Trough and peak plasma concentrations of semaglutide will be assessed throughout the trial.

### **Trial product(s):**

The investigational medicinal products used in the trial will be for once-daily oral administration as tablets and once-weekly s.c. administration using a pen injector system. The investigational medicinal products are:

Protocol  
Trial ID: NN9924-3790  
UTN: U1111-1136-4716  
EudraCT No.: 2012-004994-16

~~CONFIDENTIAL~~

|          |              |                     |
|----------|--------------|---------------------|
| Date:    | 25 June 2013 | <b>Novo Nordisk</b> |
| Version: | 1.0          |                     |
| Status:  | Final        |                     |
| Page:    | 12 of 98     |                     |

- Semaglutide 2.5 mg tablets
- Semaglutide 5.0 mg tablets
- Semaglutide 10 mg tablets
- Semaglutide 20 mg tablets
- Semaglutide 40 mg tablets
- Placebo tablets
- Semaglutide 1.34 mg/mL, solution for injection, 1.5 mL pre-filled PDS290 pen-injector

## 2 Flow chart

| Trial Periods                           |       | Screening <sup>1</sup> | Randomisation | Treatment |    |    |    |    |    |    |    | End-of-treatment <sup>2</sup> | Follow-up <sup>2</sup> | End-of-trial – premature discontinuation <sup>3</sup> |
|-----------------------------------------|-------|------------------------|---------------|-----------|----|----|----|----|----|----|----|-------------------------------|------------------------|-------------------------------------------------------|
| Visit number                            |       | 1                      | 2             | 3         | 4  | 5  | 6  | 7  | 8  | 9  | 10 | 11                            | 12                     | 11X                                                   |
| Timing of visit                         | Weeks | -2                     | 0             | 2         | 4  | 6  | 8  | 12 | 16 | 20 | 24 | 26                            | 31                     | 26                                                    |
| Visit window                            | Days  |                        |               | ±3        | ±3 | ±3 | ±3 | ±5 | ±5 | ±5 | ±3 | ±3                            | +5                     | ±3                                                    |
| <b>SUBJECT RELATED INFO/ASSESSMENTS</b> |       |                        |               |           |    |    |    |    |    |    |    |                               |                        |                                                       |
| Informed consent                        |       | x                      |               |           |    |    |    |    |    |    |    |                               |                        |                                                       |
| In- and exclusion criteria              |       | x                      | x             |           |    |    |    |    |    |    |    |                               |                        |                                                       |
| Concomitant medication                  |       | x                      | x             | x         | x  | x  | x  | x  | x  | x  | x  | x                             |                        | x                                                     |
| Concomitant illness                     |       | x                      |               |           |    |    |    |    |    |    |    |                               |                        |                                                       |
| Demography                              |       | x                      |               |           |    |    |    |    |    |    |    |                               |                        |                                                       |
| Diagnosis of diabetes                   |       | x                      |               |           |    |    |    |    |    |    |    |                               |                        |                                                       |
| Diabetes treatment history              |       | x                      |               |           |    |    |    |    |    |    |    |                               |                        |                                                       |
| Medical history                         |       | x                      |               |           |    |    |    |    |    |    |    |                               |                        |                                                       |
| Smoking habits                          |       | x                      |               |           |    |    |    |    |    |    |    |                               |                        |                                                       |
| History of gallbladder disease          |       | x                      |               |           |    |    |    |    |    |    |    |                               |                        |                                                       |
| History of cardiovascular disease       |       | x                      |               |           |    |    |    |    |    |    |    |                               |                        |                                                       |
| Renal impairment history                |       | x                      |               |           |    |    |    |    |    |    |    |                               |                        |                                                       |
| Randomisation                           |       |                        | x             |           |    |    |    |    |    |    |    |                               |                        |                                                       |
| Withdrawal criteria                     |       |                        | x             | x         | x  | x  | x  | x  | x  | x  | x  | x                             |                        |                                                       |
| Post-dose fasting routines              |       |                        |               |           |    |    |    |    |    |    |    | x                             |                        |                                                       |
| <b>EFFICACY</b>                         |       |                        |               |           |    |    |    |    |    |    |    |                               |                        |                                                       |
| Height                                  |       | x                      |               |           |    |    |    |    |    |    |    |                               |                        |                                                       |
| Body weight                             |       | x                      | x             | x         | x  | x  | x  | x  | x  | x  | x  | x                             |                        | x                                                     |
| Waist circumference                     |       |                        | x             | x         | x  | x  | x  | x  | x  | x  | x  | x                             |                        | x                                                     |
| HbA <sub>1c</sub>                       |       | x                      | x             |           | x  |    | x  |    | x  |    |    | x                             |                        | x                                                     |
| Glucose metabolism                      |       |                        | x             |           | x  |    | x  |    | x  |    |    | x                             |                        |                                                       |
| Lipids                                  |       |                        | x             |           |    |    |    |    | x  |    |    | x                             |                        |                                                       |

| Trial Periods                                     |       | Screening <sup>1</sup> | Randomisation | Treatment |    |    |    |    |    |    |    | End-of-treatment <sup>2</sup> | Follow-up <sup>2</sup> | End-of-trial – premature discontinuation <sup>3</sup> |
|---------------------------------------------------|-------|------------------------|---------------|-----------|----|----|----|----|----|----|----|-------------------------------|------------------------|-------------------------------------------------------|
| Visit number                                      |       | 1                      | 2             | 3         | 4  | 5  | 6  | 7  | 8  | 9  | 10 | 11                            | 12                     | 11X                                                   |
| Timing of visit                                   | Weeks | -2                     | 0             | 2         | 4  | 6  | 8  | 12 | 16 | 20 | 24 | 26                            | 31                     | 26                                                    |
| Visit window                                      | Days  |                        |               | ±3        | ±3 | ±3 | ±3 | ±5 | ±5 | ±5 | ±3 | ±3                            | +5                     | ±3                                                    |
| <b>SUBJECT RELATED INFO/ASSESSMENTS</b>           |       |                        |               |           |    |    |    |    |    |    |    |                               |                        |                                                       |
| PRO questionnaire                                 |       |                        | x             |           |    |    |    |    |    |    |    | x                             |                        |                                                       |
| <b>SAFETY</b>                                     |       |                        |               |           |    |    |    |    |    |    |    |                               |                        |                                                       |
| Adverse events                                    |       |                        | x             | x         | x  | x  | x  | x  | x  | x  | x  | x                             | x                      | x                                                     |
| Hypoglycaemic episodes                            |       |                        | x             | x         | x  | x  | x  | x  | x  | x  | x  | x                             | x                      | x                                                     |
| ECG, overall interpretation <sup>4</sup>          |       |                        | x             |           |    |    |    |    |    |    |    | x                             |                        |                                                       |
| Fundoscopy/fundus photography                     |       |                        | x             |           |    |    |    |    |    |    |    |                               |                        |                                                       |
| Physical examination                              |       | x                      |               |           |    |    |    |    |    |    |    | x                             |                        |                                                       |
| Vital signs                                       |       | x                      | x             | x         | x  | x  | x  | x  | x  | x  | x  | x                             |                        |                                                       |
| Antibodies <sup>5</sup>                           |       |                        | x             |           |    |    |    |    | x  |    |    | x                             | x                      |                                                       |
| Biochemistry                                      |       |                        | x             |           |    |    |    |    | x  |    |    | x                             |                        |                                                       |
| Creatinine                                        |       | x                      |               |           |    |    |    |    | x  |    |    | x                             |                        |                                                       |
| Calcitonin                                        |       | x                      |               |           |    |    |    |    | x  |    |    | x                             |                        |                                                       |
| Haematology                                       |       |                        | x             |           |    |    |    |    | x  |    |    | x                             |                        |                                                       |
| PK sampling                                       |       |                        |               | x         | x  | x  | x  | x  | x  | x  | x  | x                             |                        |                                                       |
| PK sampling (trough + peak) <sup>6</sup>          |       |                        |               |           | x  |    |    |    | x  |    |    | x                             |                        |                                                       |
| Blood pregnancy test <sup>7</sup>                 |       | x                      | x             |           | x  |    | x  | x  | x  | x  | x  | x                             | x                      | x                                                     |
| Urinalysis                                        |       |                        | x             |           |    |    |    |    | x  |    |    | x                             |                        |                                                       |
| <b>TRIAL MATERIAL</b>                             |       |                        |               |           |    |    |    |    |    |    |    |                               |                        |                                                       |
| IV/IWRS call                                      |       | x                      | x             | x         | x  | x  | x  | x  | x  | x  | x  | x                             |                        |                                                       |
| Dispensing visit                                  |       |                        | x             | x         | x  | x  | x  | x  | x  | x  | x  |                               |                        |                                                       |
| Hand out directions for use of s.c. trial product |       |                        | x             | x         | x  | x  | x  | x  | x  | x  | x  |                               |                        |                                                       |
| Drug accountability                               |       |                        |               | x         | x  | x  | x  | x  | x  | x  | x  | x                             |                        |                                                       |
| <b>REMINDERS</b>                                  |       |                        |               |           |    |    |    |    |    |    |    |                               |                        |                                                       |

| Trial Periods                                          |       | Screening <sup>1</sup> | Randomisation | Treatment |    |    |    |    |    |    |    | End-of-treatment <sup>2</sup> | Follow-up <sup>2</sup> | End-of-trial – premature discontinuation <sup>3</sup> |
|--------------------------------------------------------|-------|------------------------|---------------|-----------|----|----|----|----|----|----|----|-------------------------------|------------------------|-------------------------------------------------------|
| Visit number                                           |       | 1                      | 2             | 3         | 4  | 5  | 6  | 7  | 8  | 9  | 10 | 11                            | 12                     | 11X                                                   |
| Timing of visit                                        | Weeks | -2                     | 0             | 2         | 4  | 6  | 8  | 12 | 16 | 20 | 24 | 26                            | 31                     | 26                                                    |
| Visit window                                           | Days  |                        |               | ±3        | ±3 | ±3 | ±3 | ±5 | ±5 | ±5 | ±3 | ±3                            | +5                     | ±3                                                    |
| SUBJECT RELATED INFO/ASSESSMENTS                       |       |                        |               |           |    |    |    |    |    |    |    |                               |                        |                                                       |
| Dispense glucose meter                                 |       | x                      |               |           |    |    |    |    |    |    |    |                               |                        |                                                       |
| Dispense subject identity card                         |       | x                      |               |           |    |    |    |    |    |    |    |                               |                        |                                                       |
| Dispense diary                                         |       | x                      | x             | x         | x  | x  | x  | x  | x  | x  | x  | x                             | x                      |                                                       |
| Collect and review diary                               |       |                        | x             | x         | x  | x  | x  | x  | x  | x  | x  | x                             | x                      |                                                       |
| Attend visit fasting <sup>8</sup>                      |       |                        | x             |           | x  |    | x  |    | x  |    |    | x                             | x                      |                                                       |
| Affirmation statement or Case book signed <sup>9</sup> |       |                        |               |           |    |    |    |    |    |    |    |                               | x                      | x                                                     |
| End of trial <sup>9</sup>                              |       |                        |               |           |    |    |    |    |    |    |    |                               | x                      | x                                                     |

Abbreviations in table: ECG = electrocardiogram, HbA<sub>1c</sub> = glycosylated haemoglobin, IV/WRS = interactive voice/web response system, PK = pharmacokinetics, PRO = patient reported outcome

## 2.1 Flow chart foot notes

| Footer         | Description                                                                                                                                                                                                                                                                                                                                                                                |
|----------------|--------------------------------------------------------------------------------------------------------------------------------------------------------------------------------------------------------------------------------------------------------------------------------------------------------------------------------------------------------------------------------------------|
| x <sup>1</sup> | Subject can be randomised as soon as all inclusion and exclusion criteria are confirmed. The screening assessments must not exceed 2 weeks prior to randomisation (Visit 2).                                                                                                                                                                                                               |
| x <sup>2</sup> | The End-of-treatment and Follow-up visits are applicable for all randomised subjects including subjects who have discontinued trial product prematurely.                                                                                                                                                                                                                                   |
| x <sup>3</sup> | Subjects discontinuing trial product prematurely will be asked to attend the End-of-treatment (V11) as soon as possible after treatment discontinuation and the Follow-up – premature discontinuation (V12) five weeks later (+5 days visit window). Furthermore, they are asked to attend the End-of-trial – premature discontinuation visit (V11X) (see Section <a href="#">8.1.9</a> ). |
| x <sup>4</sup> | An ECG performed for any reason unrelated to the trial within 30 days prior to the randomisation visit is acceptable as Visit 2 data, provided no clinical symptoms suggestive of cardiac disease has occurred in the meantime.                                                                                                                                                            |
| x <sup>5</sup> | At the randomisation visit, the antibody assessment must be done pre-dose.                                                                                                                                                                                                                                                                                                                 |
| x <sup>6</sup> | Trough and peak PK sampling is only applicable for subjects in the oral treatment arms. Subjects must attend the visit without having taken the tablet on the same day (see Section <a href="#">8.4.10</a> )                                                                                                                                                                               |
| x <sup>7</sup> | For women of child bearing potential: Serum pregnancy tests must be performed.                                                                                                                                                                                                                                                                                                             |
| x <sup>8</sup> | Fasting is defined as having consumed only water since midnight. For the Follow-up visit (V12) attending fasting is defined as having consumed only water for at least the preceding 2 hours.                                                                                                                                                                                              |
| x <sup>9</sup> | Affirmation statement/case book signing and end of trial are at the Follow-up visit (V12). Only patients who have discontinued treatment prematurely are asked to attend the End-of-trial – premature discontinuation visit (V11X) which will then be end of trial.                                                                                                                        |

### **3 Background information and rationale for the trial**

The trial will be conducted in compliance with this protocol, ICH GCP<sup>1</sup> and applicable regulatory requirements, and in accordance with the Declaration of Helsinki<sup>2</sup>.

In this document, the term investigator refers to the individual responsible for the overall conduct of the clinical trial at a trial site.

#### **3.1 Type 2 diabetes mellitus and glucagon-like peptide-1**

Type 2 diabetes (T2D) is a major global health problem. The disease aetiology is multi-factorial and includes genetic predisposition in combination with sedentary life style factors such as physical inactivity and obesity.

T2D is a multi-organ disease characterised by defective insulin sensitivity in liver and skeletal muscle and a relative impairment of insulin secretion capacity. Furthermore, a blunted secretion and/or action of incretin hormones (glucagon-like peptide-1 (GLP-1) and gastric inhibitory polypeptide (GIP)) from the gastrointestinal (GI) tract (L-cells) in response to meals are also characteristics of T2D. GLP-1 is an important post-prandial hormone secreted from the L-cells in the intestine with a stimulating effect on insulin secretion and an inhibitory role on glucagon secretion from the endocrine pancreas in a glucose-dependent manner. In addition, GLP-1 restores beta-cell sensitivity to glucose. Animal studies suggest that GLP-1 also increases beta-cell mass. Extra-pancreatic effects include delaying of gastric emptying and effects on insulin sensitivity, although the latter is less clear. Pharmacological levels of GLP-1 reduce food intake and induce weight loss. As the majority (>80%) of T2D patients are overweight, the weight reduction properties of GLP-1 analogues are perceived to be advantageous compared to many other therapies for T2D. Due to the beneficial effects of GLP-1 on both glycaemic and weight control, treatment of T2D patients with GLP-1 analogues is considered favourable.

#### **3.2 Semaglutide and SNAC**

Semaglutide is a long-acting GLP-1 analogue that has achieved clinical proof of concept when administered subcutaneously (s.c.). Currently, semaglutide is in clinical development (NN9535) as a once-weekly s.c. injection for the treatment of T2D. The NN9535 project is in phase 3 development, encompassing six major safety and efficacy trials (see Section [3.2.3.2](#) for clinical data on s.c. semaglutide).

Oral administration inherently represents a different absorption route to reach systemic circulation compared to s.c. administration.

Native GLP-1 and GLP-1 analogues have in general very low oral bioavailability when administered in a formulation without absorption enhancement. Formulation with an absorption enhancing excipient is therefore needed to increase the oral bioavailability. However, exposure

exhibits a substantially greater dose-to-dose variation following oral administration compared to s.c. administration. An oral drug product with this chemical structure and properties will, because of the compound's PK properties (i.e., very low clearance and long terminal half-life), and by using once-daily administration, limit the variation in steady state plasma exposure. The initial side effects like nausea may therefore be low or absent following gradual dose escalation. Food interaction is expected to limit absorption, but a long-acting GLP-1 analogue product will allow dosing in the fasting state, without compromising the effective plasma profile. In addition, GLP-1 therapy generally does not induce hypoglycaemia on its own, which potentially could have been problematic given the large intra-patient plasma exposure variation.

Sodium N-[8-(2-hydroxybenzoyl) amino] caprylate / salcaprozate sodium (SNAC) has been studied in combination with acyclovir, peptide tyrosine tyrosine (PYY), cromolyn, ibandronate and heparin. Impact on metformin when co-administering SNAC and metformin was investigated as part of another trial involving healthy volunteers. The trial did not show any increase in metformin exposure when adding SNAC<sup>3</sup>. When co-formulated with SNAC, exposure of ibandronate (a nitrogen-containing bisphosphonate), is increased by 11- and 17-fold (AUC and C<sub>max</sub>, respectively). On the other hand, when co-administered with SNAC (in separate formulations) exposure was not affected compared to dosing ibandronate without SNAC, suggesting that the drug-drug interaction potential between SNAC and co-administered drugs with comparable physiochemical properties (compounds with permeability limited absorption) is low<sup>4</sup>.

The most extensive safety and PK data are available from the heparin formulated with SNAC programme including 32 phase 1 studies (daily SNAC doses ranged from 0.172 g – 10.5 g) of which three investigated SNAC alone. The studies covered formulation development, food effect, hepatic and renal impairment, age effect and drug-drug interactions. Three phase 2 and 3 studies have assessed effects of orally delivered heparin solution (>1.5 g SNAC three times daily). At present, no drugs containing SNAC have received regulatory approval.

### 3.2.1 Nonclinical data

The non-clinical programme for semaglutide was designed according to the International Conference on Harmonisation (ICH) M3 guideline to support the clinical development. The standard non-clinical data package required to support phase 3 clinical trials has been completed. In addition, 2-year carcinogenicity studies and a pre- and postnatal development toxicity study have been completed.

Semaglutide is generally well tolerated, with expected GLP-1 effects on food intake and body weight being the dose limiting effects, when dosed s.c. for up to two years in studies with rats and mice. No signs of overt toxicity, including safety concerns related to effects on the GI tract, were observed after oral administration of semaglutide for up to 26 weeks in rats and 17 weeks in cynomolgus monkeys. Two potential safety issues have been identified.



### 3.2.1.1 Thyroid C-cell tumours in rodents

Treatment-related non-genotoxic proliferative changes in the thyroid C-cells of mice and rats were observed in 2-year carcinogenicity studies with semaglutide. Early C-cell changes were also identified in repeated dose toxicity studies with semaglutide in mice. However this was not the case in other species including a 52-week repeat dose study in non-human primates at exposure levels up to 36-fold above the expected clinical exposure. The observed pattern of effects in mice and rats (thyroid C-cell proliferation preceded by increase in serum calcitonin) and lack of these effects in the non-human primate and in man suggest that the mechanism by which semaglutide acts on the thyroid C-cells in rodents is the same as has been demonstrated for other GLP-1 receptor agonists, including liraglutide. The relevance for human subjects is unknown.

### 3.2.1.2 Teratogenicity in rats

Semaglutide has been concluded teratogenic in rats, with exposure at no observable adverse effect level (NOAEL) below expected human exposure. This effect is regarded to be caused by impairment of nutrient supply to the embryo across the inverted yolk sac with placental function which is specific to rats. Non-human primates and humans do not depend on a yolk sac with placental function to supply nutrients to the embryo early in pregnancy. The effect on rat embryo-foetal development is therefore not likely to be relevant to humans. Preliminary and main embryo-foetal development (EFD) and pre- and postnatal development (PPND) studies with doses corresponding to 7-fold expected clinical exposure in cynomolgus monkeys have been finalised. In the main EFD study sporadic abnormalities were reported across all dose groups and in the PPND study a dose dependent increase in early pregnancy losses were observed. The findings observed across the three studies in cynomolgus monkeys are not indicative of teratogenic potential of semaglutide in this species. The increase in early pregnancy losses is indicative of embryo-toxicity, which may be related to the maternal effect of semaglutide (marked body weight loss). A developmental toxicity NOAEL was determined at an exposure 0.8-fold the expected clinical exposure (1 mg/week). A risk for the developing human embryo or foetus cannot be definitely ruled out, but the absence of findings indicative of teratogenicity in the EFD and PPND studies in cynomolgus monkey decrease the level of concern.

A comprehensive review of results from the non-clinical studies can be found in the IB for Semaglutide (subcutaneous administration), Edition 8<sup>5</sup> and the IB for Oral administration of semaglutide (NN9924), Edition 5<sup>6</sup>, or any updates of these documents

### 3.2.1.3 SNAC toxicology

The nonclinical safety programme for SNAC includes safety pharmacology, metabolism and PK and toxicology and is in line with the ICH M3 guideline<sup>7</sup>. SNAC was developed as an absorption enhancing excipient for the oral route of administration.

SNAC is rapidly absorbed (time to maximal concentration ( $t_{max}$ ) within 1 hour) and eliminated ( $t_{1/2}$  = 1 and 3 hours across species). SNAC is metabolised mainly via stepwise beta-oxidation and de-acetylation of the side chain and the parent compound and its metabolites also undergo conjugation with glucuronic acid. The main elimination route for SNAC metabolites is via urinary excretion.

SNAC was generally well tolerated in animals at and below oral doses of 500 mg/kg/day (NOAEL) for up to nine (Rhesus monkey) and twelve (rat) months. Although no overt specific organ toxicity has been observed, SNAC was associated with treatment-related and unexplained mortality at dose levels only 1.5- to 3-fold above NOAEL in rat studies. A series of nonclinical studies to explore possible cause of death have been initiated. These studies include investigations to expand the standard package of nonclinical studies on CV and respiratory function, and systematic investigations of histological changes in the GI tract and liver after dosing of high concentration/high volumes of SNAC. To support the assessment of exposure margins between rats and humans, extensive PK and metabolism studies in rats are carried out. The quantification of SNAC metabolites will also be assessed in the on-going multiple dose (MD) clinical trial (NN9924-3991).

In an on-going two-year carcinogenicity study with rats, one unexplained death occurred at a dose of 200 mg/kg/day. Several cases of unexplained death were observed at 900 mg/kg/day in repeat dose toxicity studies of 26 weeks and 52-weeks duration. A NOAEL for SNAC has been determined to be 90 mg/kg/day (corresponding to ~4 to 6 times a human dose of 300 mg based on exposure (area under curve)). Histological changes (perivascular lymphoid aggregates) have been observed in the lungs at all SNAC dose levels in the 6-month rat study. SNAC appeared to exacerbate these lesions which may be indicative of an immunosuppressant effect.

### **3.2.2 Nonclinical pharmacology and pharmacokinetics**

The focus of the studies done in relation to oral administration of semaglutide in combination with SNAC has been on the following issues:

#### **Mechanism *in vitro***

SNAC increases absorption of drug compounds through the GI epithelium, which has been shown in humans (e.g., for endogenous GLP-1). *In vitro* studies have indicated that transport of compounds occurs mainly via the trans-cellular route and the effect is dependent on both the concentration of SNAC and the duration of incubation.

#### **Enhancement of absorption *in vivo***

SNAC enhances absorption of semaglutide from the stomach and small intestine in rats. There is considerable variability (coefficient of variation around 100%) with some animals showing no absorption. In the dog, there is higher bioavailability after oral dosing of tablets (1-2.5%) than after capsules (0.7%) or solution (0.07%). Semaglutide and SNAC have to be formulated in the same

tablet to get increased oral bioavailability of semaglutide, indicating that close interaction between the two molecules is necessary for enhancing the absorption. There is a strong reduction of bioavailability to practically zero when given concomitantly with food in dogs, and also an increasing amount of water dosed with the tablet seems to reduce oral bioavailability of semaglutide in this model, mimicking recent results in a human trial. Doses of SNAC of 150, 300 and 600 mg have been tested in dogs, and there was a tendency towards an optimum at 300 mg in terms of bioavailability. Furthermore, there is a tendency for non-linearity in bioavailability when increasing the amount of both SNAC and semaglutide in combination or semaglutide alone with constant SNAC content, whereas increasing amounts of SNAC alone (300 (one tablet) to 900 mg (three tablets)) with constant amount of semaglutide do not seem to significantly increase bioavailability.

### **Pharmacodynamics after oral administration**

Semaglutide dosed in combination with SNAC is able to induce the same type of PD effects on blood glucose, food intake and body weight as seen after s.c. administration of semaglutide and other marketed GLP-1 analogues. Thus, semaglutide in combination with SNAC lowered blood glucose and body weight in diabetic db/db mice, and reduced food intake and body weight in normal rats.

### **3.2.3 Clinical data**

#### **3.2.3.1 Data from literature**

Currently, no orally administered GLP-1 receptor agonist is available for the treatment of T2D.

There are, however, s.c. administered GLP-1 receptor agonists on the market and experience from their development has identified some potential safety issues for this class of compounds. Nonclinical thyroid C-cell tumours have been observed in rodents. Acute pancreatitis has been associated with chronic administration of GLP-1 receptor agonists in man. Elevated lipase has been observed in clinical studies but dose-response relationship and overall clinical significance is unclear. Hypoglycaemia, GI adverse events (i.e., nausea and vomiting), increased heart rate and renal dysfunction due to volume depletion following GI effects have also been observed.

#### **3.2.3.2 Clinical data of s.c. semaglutide**

As of 1 February 2013, 5 clinical pharmacology trials (NN9535- 1820, -3679, -3633, -3616 and -3819) and 1 phase 2 trial (NN9535-1821) have been completed using s.c. semaglutide. A total of 519 subjects have been exposed to s.c. semaglutide: 164 healthy subjects (both single and multiple dosing), 313 patients with T2D (up to 12 weeks of treatment) and 42 patients (4 subjects had T2D) with varying degrees of renal impairment (single dosing).

### ***Pharmacokinetics***

Results from 2 phase 1 trials (NN9535-3616 and 3819) show that s.c. semaglutide has pharmacokinetics (PK) properties compatible with once-weekly administration, with a median time to maximum concentration (t<sub>max</sub>) of 36 hours post dosing and an elimination half-life (t<sub>1/2</sub>) in the range of 165-184 hours (~7 days, harmonic mean). Overall, the PK properties of s.c. semaglutide appear similar in Caucasian and Japanese subjects, and also in healthy subjects and subjects with T2D. In a trial with subjects with different degrees of renal impairment (NN9535-3616), data suggested that severe renal impairment result in a slightly higher exposure compared to subjects with normal renal function (AUC<sub>0-∞</sub> increased by approximately 22%), whereas subjects with mild or moderate renal impairment and subjects on haemodialysis had exposure similar to subjects with normal renal function. No safety signals were identified in either of the renal groups, and tolerability profiles appeared similar across renal groups; thus, a dose-reduction in subjects with severe renal impairment does not appear to be warranted.

Interaction with oral contraceptives was assessed at semaglutide 1.0 mg steady-state exposures in postmenopausal women with T2D (NN9535-3819). Steady-state exposures (AUC<sub>0-24h</sub>) of ethinylestradiol (EE) and levonorgestrel (LN) were slightly increased (by 10% and 21%, respectively), with bioequivalence established for EE but not for LN; the increase was seen when oral contraceptives were co-administered with semaglutide compared to oral contraceptives alone.

Bioequivalence was demonstrated for C<sub>max</sub> of both EE and LN. These data indicate that semaglutide does not decrease the exposure of oral contraceptives, and suggest that no adjustments of oral contraceptive dose are warranted for women of childbearing potential using a low-dose oral contraceptive.

### ***Efficacy***

As of 1 February 2013, efficacy of s.c. semaglutide in the target population – subjects with T2D – has been investigated in one phase 2 dose range finding trial (NN9535-1821). The trial was a 12-week, randomised, double-blind, placebo- and active-controlled trial in which 411 adults with T2D received once-weekly s.c. injection of 1 of 5 semaglutide dose levels (0.1-1.6 mg) once-daily, open-label liraglutide (1.2 mg or 1.8 mg) or once-weekly placebo. 12 weeks of treatment, equivalent to 5-7 weeks in steady state on maintenance dose, provided statistically significant and clinically relevant improvement in glycaemic control for dose levels of 0.2 mg and above. Changes in HbA<sub>1c</sub> from baseline was up to -1.19 % (placebo adjusted estimated treatment difference). Dose-dependent improvements in fasting plasma glucose (FPG) and postprandial plasma glucose were also observed. The improvement in glycaemic control was accompanied by weight loss for semaglutide doses of 0.8 mg and above (placebo adjusted estimated treatment difference up to -3.64 kg).

### ***Safety***

From the clinical trials conducted so far the following safety observations have been made.

Consistent with findings with other GLP-1 receptor agonists, common adverse events (AEs) included nausea and vomiting; most of them were mild to moderate in intensity. Hypoglycaemia has occurred in subjects receiving semaglutide and these events have mainly been minor.

An increase in heart rate has been observed in subjects exposed to semaglutide in line with the increase seen with other GLP-1 analogues. The implications of this increase are unknown.

As is the case with all protein-based pharmaceuticals, subjects treated with s.c. semaglutide may develop immunogenic and allergic reactions. Few allergic reactions have been reported in connection with semaglutide. These have mainly been mild and transient. However, more generalised reactions may occur.

Injection site reactions have been infrequently reported. These have mainly been mild and transient in nature.

Please see appropriate IB<sup>5</sup> for further details.

### 3.2.3.3 Clinical data of oral GLP-1

Clinical trials with increasing doses of oral semaglutide up to two tablets with 10 mg semaglutide and 300 mg SNAC have shown this to be safe and well tolerated. The oral semaglutide had acceptable bioavailability and a PK profile of two tablets with 10 mg semaglutide was similar to 0.5 mg s.c. semaglutide. Variability of the day-to-day PK profile was 3-4 times higher than compared to 0.5 mg s.c. once-weekly semaglutide but acceptable for further development.

The oral bioavailability of human GLP-1 has been demonstrated to increase several fold when formulated with SNAC with a  $t_{max}$  of approximately 15-30 min. In addition, even in healthy subjects a glucose-dependent insulinotropic action of GLP-1 upon oral delivery was shown.

Five phase 1 trials with oral semaglutide and SNAC have been completed:

- Single dose trial (NN9924-3691)
- Multiple dose trial 1 (NN9924-3692)
- Dosing condition trial (NN9924-3794)
- Pharmaco-scintigraphy trial (NN9924-3957)
- Multiple dose trial 2 (NN9924-3991)

For details on the individual trials, please see the current edition of the IB (Oral Administration of Semaglutide (NN9924)) Edition 5<sup>6</sup> and any updates hereof.

### 3.2.3.4 Clinical data of SNAC

The largest safety data set exists from the programme of orally administered SNAC and heparin (all sponsored by Emisphere): 29 phase 1 trials (doses up to 10.5 g of SNAC), one phase 2 trial

(doses 1.5 g and 2.25 g of SNAC three times daily for 5 days) and two phase 3 trials (doses: 1.5 and 2.25 g of SNAC three times daily for 30 days) have been reported.

Oral SNAC exposure has most extensively been investigated in the phase 3 trial, named ERP-12. The objective of the trial was to investigate prevention of venous thrombotic complications following total hip replacement. Enrolled subjects were randomised in three treatments arms:

- Low dose SNAC (1.5 g) and heparin (60,000 USP units) thrice-daily for 30 days
- High dose SNAC (2.25 g) and heparin (90,000 USP units) thrice-daily for 30 days
- Enoxaparin sodium 30 mg s.c. twice-daily for 10 days

Total daily dose of oral SNAC was 4.5 g (low dose), 6.75 g (high dose) or 0 g (heparin s.c.). A total of 2,264 patients were enrolled with approximately 750 in each group.

The most frequently reported AEs were GI disorders with a dose relationship of SNAC and heparin, which also reflected the most common AEs reported for discontinuation. The SAEs were evenly distributed between the groups for all system organ classes other than GI disorders. Likewise, all deaths were evenly distributed between the groups and their nature and diversity did not indicate any causal relationship to trial drug. No other clinical significant safety issue was identified in the trial<sup>8</sup>.

For further details please see the current edition of the IB (Oral Administration of Semaglutide (NN9924)) Edition 5<sup>6</sup> and any updates hereof.

### **3.3 Risks and benefits of the trial**

There are s.c. administered GLP-1 receptor agonists on the market and experience from their development as well as experience from the s.c. semaglutide development programme have identified some potential safety issues for this class of compounds: 1) risk of teratogenicity, 2) risk of thyroid C-cell tumours, 3) risk associated to high doses of SNAC, 4) risk of carcinogenicity of SNAC, 5) risk of pancreatitis, 6) risk of antibody formation, 7) risk of allergic reactions, 8) risk of heart rate increase, 9) risk of severe risk of hypoglycaemia and 10) risk of altered renal function.

For further details please see the current edition of the IB (Oral Administration of Semaglutide (NN9924)) Edition 5<sup>6</sup> and any updates hereof.

In this trial, most subjects will receive a treatment anticipated to be more efficacious than the treatment they receive at the time of randomisation into the trial. It is expected that subjects will benefit from the trial treatment with respect to optimised glycaemic control, a reduced risk of long-term diabetic complications and a potential weight loss. The subjects in this trial will receive trial drug and auxiliary free of charge. Furthermore it is expected that all subjects participating in the trial will benefit from participation through close contact with the study site and close follow-up of

their T2D. Such careful medical examination will most likely result in an intensified management of their diabetes.

It is concluded that the potential benefits from participating in the trial outweigh the potential risks. The safety profile of semaglutide generated from the clinical and nonclinical development programme has not revealed any safety issues that would prohibit administration of once-daily doses of 2.5 to 40 mg semaglutide with 300 mg SNAC or once-weekly doses of 1.0 mg semaglutide in accordance with the planned clinical trial. The risk to the subjects in this trial is low and acceptable in view of the benefits an oral GLP-1 analogue would provide to subjects with T2D.

### **3.4 Rationale for the trial**

The trial will compare efficacy of oral semaglutide formulated with a fixed dose of 300 mg SNAC. To facilitate the generation of clinical data in subjects with T2D, the NN9924-3790 trial has been designed to investigate a dose range expected to cover relevant therapeutic levels, including systemic exposure equivalent to 0.5 and 1.0 mg of once-weekly s.c. semaglutide. Additional dose levels are examined to elucidate a wider dose-response spectrum below and above the expected therapeutic range. In addition, the trial will explore the safety and tolerability of three different dose escalation approaches (i.e., slow, standard and fast). Finally, the trial will compare parameters of efficacy, safety and tolerability and population PK after 26 weeks of treatment between the treatment arms.

Data from the NN9924-3790 trial combined with the results of other trials investigating semaglutide will support the decision to continue into phase 3 development.

## 4 Objective(s) and endpoint(s)

The objectives of the trial, addressed after 26 weeks of treatment, are as follows:

### 4.1 Objectives

#### 4.1.1 Primary objective

- To compare the efficacy on glycaemic control of oral semaglutide in a SNAC formulation against placebo in subjects with T2D

#### 4.1.2 Secondary objectives

- To compare the efficacy on glycaemic control of oral semaglutide in a SNAC formulation against s.c. semaglutide in subjects with T2D
- To compare the safety and tolerability of three dose escalation schemes using a single end dose level during 26 weeks administration of oral semaglutide and SNAC in a tablet formulation in subjects with T2D
- To compare parameters of efficacy, safety and tolerability, and population PK as reflected by endpoints below after 26 weeks of treatment

### 4.2 Endpoints

#### 4.2.1 Primary endpoint

- Change in HbA<sub>1c</sub> from baseline to after 26 weeks of treatment

#### 4.2.2 Supportive secondary endpoints

##### *Supportive secondary efficacy endpoints*

- Subjects who, after 26 weeks of treatment, achieve (yes/no) HbA<sub>1c</sub> <7% (53 mmol/mol)\*
- Change in fasting plasma glucose (FPG), C-peptide, fasting insulin and glucagon from baseline to after 26 weeks of treatment
- Change in insulin resistance (homeostatic model assessment index of insulin resistance (HOMA-IR)) and beta-cell function (homeostatic model assessment index of beta-cell function (HOMA-B)) from baseline to after 26 weeks of treatment
- Change in fasting lipid profile (total cholesterol, low density lipoprotein (LDL), high density lipoprotein (HDL), very low density lipoprotein (VLDL), triglycerides and free fatty acids) from baseline to after 26 weeks of treatment
- Change from baseline to week 26 in the patient reported outcome Medical Outcomes Study 36-Item Short-Form Health Survey (SF-36) (generic questionnaire)
- Change in body weight from baseline to after 26 weeks of treatment\*
- Change in waist circumference from baseline to after 26 weeks of treatment\*



- Change in body mass index (BMI) from baseline to after 26 weeks of treatment\*

***Supportive secondary safety endpoints***

- Number of treatment emergent adverse events (TEAEs) recorded from baseline until week 31\*
- Number of confirmed hypoglycaemic episodes recorded from baseline until week 31\*
- Change in vital signs (pulse, systolic- and diastolic blood pressure) from baseline to after 26 weeks of treatment
- Change in electrocardiogram (ECG) from baseline to after 26 weeks of treatment
- Change in physical examination from baseline to after 26 weeks of treatment
- Change in laboratory safety variables (haematology, biochemistry, hormone and urinalysis) from baseline to after 26 weeks of treatment
- Occurrence of antibodies against semaglutide during 26 weeks of treatment (positive/negative):
  - Anti-semaglutide antibodies
  - Anti-semaglutide antibodies with *in vitro* neutralising effect
  - Anti-semaglutide antibodies cross reacting with endogenous GLP-1
  - Cross reacting antibodies with *in vitro* neutralising effect to endogenous GLP-1
  - Antibody level during 26 weeks of treatment

***Supportive secondary pharmacokinetic endpoint***

- Semaglutide concentrations to be evaluated in a population PK analysis

\* Key supportive secondary endpoint prospectively selected for posting on [clinicaltrials.gov](http://clinicaltrials.gov)

## 5 Trial design

### 5.1 Type of trial

This is a randomised, partially-blinded, dose range, dose escalation, multicentre trial including nine treatment arms in total; seven oral semaglutide treatment arms, an oral placebo arm and an s.c. semaglutide arm with a parallel design (see [Figure 5–1](#)). All treatment arms include subjects with T2D who have failed on diet and exercise and/or metformin. The placebo tablets do not contain SNAC.

| Week        |           | 0       | 2       | 4                                   | 6     | 8     | 12 | 16    | 20 | 24 | 26 | 31        |
|-------------|-----------|---------|---------|-------------------------------------|-------|-------|----|-------|----|----|----|-----------|
| Dose range  | Oral OD 1 | 2.5 mg  |         |                                     |       |       |    |       |    |    |    | Follow-up |
|             | Oral OD 2 | 2.5 mg  |         | 5.0 mg                              |       |       |    |       |    |    |    | Follow-up |
|             | Oral OD 3 | 5.0 mg  |         | 10 mg                               |       |       |    |       |    |    |    | Follow-up |
|             | Oral OD 4 | 5.0 mg  |         | 10 mg                               |       | 20 mg |    |       |    |    |    | Follow-up |
|             | Oral OD 5 | 5.0 mg  |         | 10 mg                               |       | 20 mg |    | 40 mg |    |    |    | Follow-up |
| Escalation  | Oral OD 6 | 5.0 mg  |         |                                     |       | 10 mg |    | 20 mg |    | 40 |    | Follow-up |
|             | Oral OD 7 | 5.0     | 10      | 20                                  | 40 mg |       |    |       |    |    |    |           |
| Comparators | Oral OD 8 | Placebo |         |                                     |       |       |    |       |    |    |    | Follow-up |
|             | s.c. OW 9 | 0.25 mg | 0.50 mg | 1.0 mg s.c. semaglutide, open-label |       |       |    |       |    |    |    |           |

OD: once-daily, OW: once-weekly

**Figure 5–1 Trial design of NN9924-3790**

Subjects with T2D will be randomised in an equal manner with 67 subjects planned to be randomised per treatment arm. Treatment arms 1-8 will include once-daily dosing of a tablet and will be blinded. Treatment arm 9 features open-label once-weekly s.c. injection. All arms include 26 weeks of treatment and a 5 week follow-up period. Oral dosing will be performed following specified fasting conditions (see [Figure 5–2](#)).

The nine treatment arms will include:

1. Semaglutide tablets once-daily: 2.5 mg for 26 weeks
2. Semaglutide tablets once-daily: 2.5 mg for 4 weeks, then 5.0 mg for 22 weeks
3. Semaglutide tablets once-daily: 5.0 mg for 4 weeks, then 10 mg for 22 weeks
4. Semaglutide tablets once-daily: 5.0 mg for 4 weeks, then 10 mg for 4 weeks, then 20 mg for 18 weeks

5. Semaglutide tablets once-daily: 5.0 mg for 4 weeks, then 10 mg for 4 weeks, then 20 mg for 4 weeks, then 40 mg for 14 weeks
6. Semaglutide tablets once-daily: 5.0 mg for 8 weeks, then 10 mg for 8 weeks, then 20 mg for 8 weeks, then 40 mg for 2 weeks
7. Semaglutide tablets once-daily: 5.0 mg for 2 weeks, then 10 mg for 2 weeks, then 20 mg for 2 weeks, then 40 mg for 20 weeks
8. Placebo tablets once-daily for 26 weeks
9. Semaglutide injections once-weekly: 0.25 mg for 4 weeks, then 0.50 mg for 4 weeks, then 1.0 mg for 18 weeks

For all groups the trial medication will be add-on to previous metformin therapy or as monotherapy in the case where the subject with T2D is treated with diet and exercise alone. At randomisation, subjects will be stratified according to one stratification value with two strata: Treatment with metformin at screening (yes/no).

## 5.2 Rationale for trial design

Parallel treatment groups and a randomised partially-blinded, controlled design have been chosen in accordance with the trial objectives. To avoid bias in the assessment of the different doses of oral semaglutide, the eight oral treatment arms are double-blind. The doses are escalated in standard four week intervals to limit gastrointestinal AEs. Escalation intervals of two weeks and six weeks are also being explored to investigate effect on onset of action and overall AEs.

The use of s.c. semaglutide as active comparator was chosen to confirm that oral semaglutide in at least one of the selected doses reach the same levels of systemic exposure as for s.c. semaglutide. The active comparator is open-label to limit unnecessary injections (e.g., by use of double-dummy) as the objectives of the trial are to investigate the effects of the oral formulation.

## 5.3 Treatment of subjects

The subjects will attend a screening visit to determine their eligibility. If found eligible, the subjects will return for the first treatment visit where they will be randomised and receive treatment. The total duration of the trial will be 31 weeks for all subjects from randomisation to last visit. The highest dose for any trial subject will be 40 mg oral semaglutide once-daily or 1.0 mg s.c. semaglutide once-weekly.

Metformin is considered background medication (non-investigational medicinal product) and will not be provided by Novo Nordisk. Metformin should be used at the discretion of the investigator. Treatment with metformin extended/slow release formulations is allowed.

For the safety of the subjects, medications with a narrow therapeutic window may not be used in the trial (see the exclusion criteria, Section [6.3](#)).

Subjects will follow a fixed dose escalation regimen, which they have been randomised to, following the scheme in [Figure 5-1](#).

### 5.3.1 Dose levels and escalation regimen for oral dosing

Subjects on the oral dosing (treatment arms 1-8) must administer the dose following specific rules:

- Fasting for at least six hours (e.g., in the morning following an overnight fast) before tablet ingestion
- Water and oral concomitant medication is allowed two hours prior to dosing
- Intake of maximum 120 mL of water is allowed when swallowing the tablet
- Subjects are required to abstain from food and fluid intake for at least 30 minutes after ingestion of oral semaglutide or placebo
- Oral concomitant medication can be taken two hours post-dosing. If taken with food, concomitant medication can be administered 30 minutes after ingestion of the semaglutide or placebo tablet

See illustration of oral dosing and fasting rules in [Figure 5-2](#).

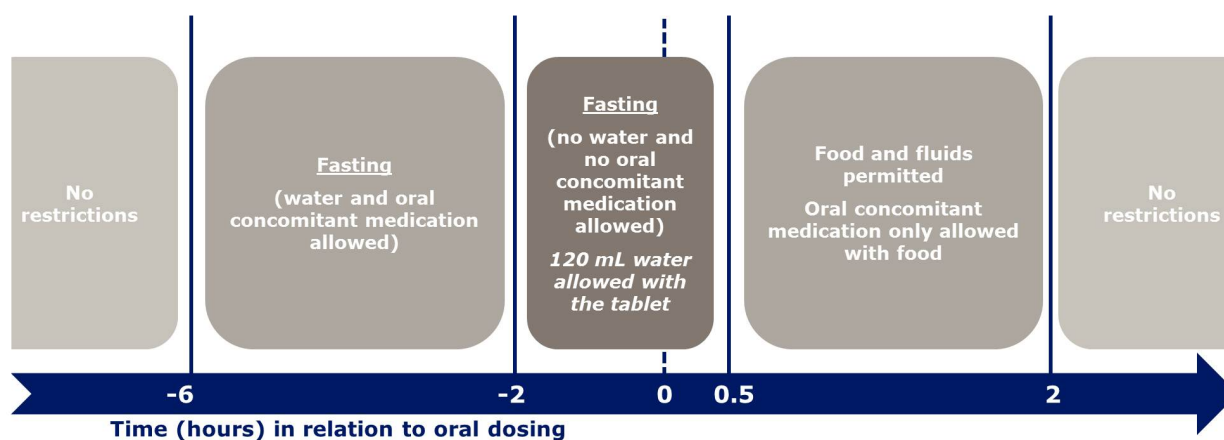

Figure 5-2 Dosing and fasting conditions for oral treatment (arms 1-8)

### 5.3.2 Dose levels and escalation regimen for s.c. dosing

Subjects randomised to the s.c. treatment arm will follow a fixed dose escalation for semaglutide. The maintenance dose of 1.0 mg will be reached after four doses (four weeks) of 0.25 mg, followed by four doses (four weeks) of 0.50 mg. The maintenance dose of 1.0 mg, once attained, may not be decreased for the duration of the study. Injections may be administered in the thigh, abdomen or upper arm, at any time of day irrespective of meals. The injections should be administered on the same day of the week during the trial.

#### **5.4 Treatment after end of trial**

The trial products will not be available to subjects after the end of trial.

When discontinuing trial products the subject should be switched to a suitable marketed product at the discretion of the investigator.

#### **5.5 Rationale for treatment**

The oral route of semaglutide administration investigated has been chosen to increase convenience and initiate earlier use of GLP-1 treatment of T2D patients, thus offering true GLP-1 benefits in a tablet format. The dose range of the oral treatment (2.5 mg, 5 mg, 10 mg, 20 mg and 40 mg) has been chosen based on phase 1 data and modelling derived from phase 1 trials with the aim to cover the same exposure as observed with s.c. semaglutide. The standard escalation scheme (i.e., dose escalation every four weeks to desired dose) has been chosen based on phase 1 data. The slow and fast dose escalation arms will investigate if AEs decrease or increase, respectively, compared to the standard dose escalation. The 26-week treatment period will provide additional data on safety and tolerability, investigate the variability at steady state exposure, test for efficacy and suggest which doses and escalation scheme to continue into pivotal development.

For further details please see the current edition of the IB (Oral Administration of Semaglutide (NN9924)) Edition 5<sup>6</sup> and any updates hereof.

## 6 Trial population

### 6.1 Number of subjects

|                                                    |       |
|----------------------------------------------------|-------|
| Number of subjects planned to be screened:         | 1,005 |
| Number of subjects planned to be randomised:       | 603   |
| Number of subjects expected to complete the trial: | 482   |

### 6.2 Inclusion criteria

For an eligible subject, all inclusion criteria must be answered “yes”.

1. Informed consent obtained before any trial-related activities. Trial-related activities are any procedures that are carried out as part of the trial, including activities to determine suitability for the trial
2. Male or female, age  $\geq 18$  years at the time of signing informed consent
3. BMI  $\geq 25$  and  $\leq 40$  kg/m<sup>2</sup>
4. Subjects diagnosed with T2D treated with diet and exercise and/or who have been on a stable dose of metformin for at least 30 days prior to screening
5. HbA<sub>1c</sub> 7.0-9.5% (53-80 mmol/mol) (both inclusive)

### 6.3 Exclusion criteria

For an eligible subject, all exclusion criteria must be answered “no”.

1. Known or suspected hypersensitivity to trial product(s) or related products
2. Previous participation in this trial. Participation is defined as informed consent
3. Female who is pregnant, breast-feeding or intends to become pregnant or is of child-bearing potential and not using an adequate contraceptive method (adequate contraceptive measures as required by local regulation or practice) for the duration of the trial and for three months following last dose  
*Germany: Adequate contraceptive measures are implants, injectables, combined oral contraceptives, hormonal intrauterine device, sexual abstinence or vasectomised partner.*  
*Sweden: Adequate contraceptive measures are hormonal intrauterine devices, hormonal oral contraceptives, hormonal implants or injections, double barrier (a condom or diaphragm) with spermicide, sexual abstinence or vasectomised partner.*  
*United Kingdom: Established use of oral, injected or implanted hormonal methods of contraception, intrauterine device or intrauterine system, barrier methods of contraception (condom or occlusive cap with spermicidal foam/gel/film/cream/suppository, male sterilisation or true abstinence when in line with the preferred and usual lifestyle of the subject.*
4. Participation in another clinical trial within 30 days before the screening visit
5. Any chronic disorder or severe disease which, in the opinion of the investigator, might jeopardise subject’s safety, compliance with the protocol and/or ability to complete the study

6. Subjects on selected oral medication with a narrow therapeutic window, such as warfarin, digoxin, tricyclic antidepressants, lithium, aminophylline, theophylline and anticonvulsants
7. History of chronic pancreatitis or idiopathic acute pancreatitis
8. Screening calcitonin value  $\geq 50$  ng/L
9. Personal or family history of medullary thyroid carcinoma (MTC) or multiple endocrine neoplasia syndrome type 2 (MEN2)
10. Chronic malabsorption, regardless of aetiology
11. History of Crohn's disease, ulcerative colitis, or other inflammatory bowel disease
12. Previous gastrointestinal surgery such as invasive and corrective procedures involving the oesophagus, stomach, duodenum, gallbladder, pancreas or intestinal resections. Exempt are subjects that underwent uncomplicated surgical and diagnostic procedures such as appendectomy, hernia surgery, polypectomy, biopsies, as well as colonic- and gastric endoscopy
13. Surgery scheduled for the trial duration period (excluding minor surgical procedures performed in local anaesthesia, according to the opinion of the investigator)
14. Treatment with glucose lowering agent(s) other than metformin as stated in the inclusion criteria in a period of 90 days before the screening visit
15. Mental inability, unwillingness or language barrier precluding adequate understanding of or compliance with study procedures
16. Impaired renal function defined as estimated glomerular filtration rate (eGFR)  $< 60$  mL/min/1.73 m<sup>2</sup> per Modification of Diet in Renal Disease (MDRD) formula
17. Heart failure, New York Heart Association (NYHA) class IV
18. Within the past 6 months before the screening visit, any of the following: Episode of unstable angina, acute coronary event, cerebral stroke/transient ischemic attack or other significant cardiovascular event as judged by the investigator
19. Uncontrolled hypertension (defined as systolic blood pressure  $\geq 180$  mmHg or diastolic blood pressure  $\geq 100$  mmHg)
20. Known proliferative retinopathy or maculopathy requiring acute treatment according to the opinion of the investigator
21. Diagnosis of malignant neoplasm in the previous five years from the screening visit (except basal cell skin cancer or squamous cell skin cancer)

#### **6.4 Rescue criteria**

Subjects with unacceptable hyperglycaemia should be offered treatment intensification (rescue medication) according to local label at the discretion of the investigator as add-on to randomised treatment and should continue to follow the protocol-specified visit schedule. Rescue medication should exclude other incretin-based therapies such as other GLP-1 receptor agonists, DPP-4 inhibitors and amylin analogues.

Unacceptable hyperglycaemia in this trial is defined as:

- FPG >15 mmol/L (270 mg/dL) from baseline to week 6
- FPG >13.3 mmol/L (240 mg/dL) from week 6 to week 12
- FPG >11.1 mmol/L (200 mg/dL) or HbA<sub>1c</sub> > 8.0% (64 mmol/mol) from week 12 to end of trial

## 6.5 Withdrawal criteria and discontinuation of trial product

### 6.5.1 Withdrawal from trial

The subject may withdraw at will at any time. The subject may be withdrawn from the trial at the discretion of the investigator due to a safety concern. Please see Section [8.1.10](#) for procedure to be performed in case of subject withdrawal.

A subject must be withdrawn from the trial if the following applies:

1. Included in the trial in violation of the inclusion and/or exclusion criteria
2. Pregnancy
3. Intention of becoming pregnant

Subjects should stay in the trial irrespective of lack of adherence to randomised treatment, lack of adherence to visit schedule, missing assessments, trial product discontinuation due to AE (see Section [6.5.2](#)), unwillingness to cope with injection regimen, development of co-morbidities or clinical outcomes, hence this should not be considered as a valid reason for withdrawal from the trial.

Subjects considering withdrawing from the trial should be encouraged to have the procedures performed according to the End-of-treatment visit and the Follow-up visit, please see Section [8.1.8](#).

Subjects who are withdrawn will not be replaced.

### 6.5.2 Discontinuation of trial product

The trial treatment must be discontinued if the subject meets one of the following criteria:

1. The investigator suspects acute pancreatitis. All drugs suspected to relate to this condition should be discontinued until confirmatory tests have been conducted and appropriate treatment should be initiated. Subjects who are diagnosed with acute pancreatitis must be discontinued from trial treatment. Diagnosis is based on at least 2 of the following 3 criteria:
  - a. characteristic abdominal pain
  - b. amylase and/or lipase > 3x upper normal range, or
  - c. characteristic findings on ultrasound / computerised axial tomography (CT) / magnetic resonance imaging (MRI)
2. Calcitonin level  $\geq 50$  ng/L. The subject should be referred to a specialist in thyroid disease. All drugs suspected to relate to this condition should be discontinued



### 3. Other safety concerns as evaluated by the investigator

A treatment discontinuation session must be performed in the interactive voice/web response system (IV/WRS). The primary reason for discontinuation of the IMP must be specified in the electronic case report form (eCRF).

Subjects discontinuing the IMP should be called in for the End-of-treatment visit as soon as possible after discontinuation of the IMP and for the Follow-up visit five weeks later. Furthermore, the subjects should attend the End-of-trial – premature discontinuation visit (see Section [8.1.9](#)).

If the IMP is discontinued, the subject can be prescribed alternative therapy at the investigator's discretion.

### 6.6 Rationale for trial population

This trial will include adult subjects with T2D and insufficient glycaemic control following treatment with diet/exercise or metformin. The T2D subjects will have an HbA<sub>1c</sub> of 7.0-9.5% and a BMI of 25-40 kg/m<sup>2</sup>. The trial will be carried out in Europe, North America and single countries in Africa, Asia and the Middle East as the first global, multicentre trial and will include both genders. This population is expected to mimic the target population in both a future phase 3 programme and once marketed.

## 7 Milestones

Planned duration of recruitment period (i.e., first subject first visit (FSFV) on 2 Dec 2013 – last subject first visit on 21 Apr 2014): 20 weeks

End of trial is defined as last subject last visit: 8 Dec 2014

### Recruitment

The clinical sites participating in the trial will recruit subjects according to a recruitment plan.

The screening and randomisation rate will be followed closely via the interactive voice/web response system (IV/WRS) in order to estimate when to stop screening. All investigators will be notified immediately when the recruitment period ends, after which no further subjects may be screened and the IV/WRS will be closed for further screening. All subjects included in the screening period and eligible for randomisation will be randomised.

### Trial registration

Information of the trial will be disclosed at [clinicaltrials.gov](http://clinicaltrials.gov) and [novonordisk-trials.com](http://novonordisk-trials.com). According to the Novo Nordisk Code of Conduct for Clinical Trial Disclosure, it will also be disclosed according to other requirements such as those of the International Committee of Medical Journal Editors (ICMJE)<sup>9</sup>, the Food and Drug Administration Amendment Act (FDAAA)<sup>10</sup>, European Commission Regulation for EudraCT<sup>11</sup> and other relevant recommendations or regulations. If a subject requests to be included in the trial via the Novo Nordisk e-mail contact at these web sites, Novo Nordisk may disclose the investigator's contact details to the subject. As a result of increasing requirements for transparency, some countries require public disclosure of investigator names and their affiliations.

## **8 Methods and assessments**

### **8.1 Visit procedures**

#### **8.1.1 Introduction**

Throughout the trial the investigator must ensure working in accordance with ICH GCP<sup>1</sup> and local regulations. The investigator must ensure that trial procedures are performed as described in the protocol. Any discrepancies will result in protocol and/or GCP deviations and the investigator must take appropriate actions to avoid recurrence of the detected discrepancies.

#### **8.1.2 Visit 1 (Screening)**

For procedures and assessments performed at screening, please see flow chart Section [2](#).

Investigators must obtain informed consent for each subject no later than at Visit 1 prior to any protocol-related procedures. For information on informed consent procedure please see Section [18.1](#).

All subjects will be provided with a copy of their own signed and dated informed consent form.

The IV/WRS must be contacted to register the subject as screened (see Section [10](#)) at the screening visit. Subject will be assigned a unique number (lowest available number allocated to site) which is maintained throughout the trial.

The investigator must keep a subject screening log, a subject identification code list and a subject enrolment log. The subject screening log and subject enrolment log may be combined in one list and may be generated from IV/WRS.

At screening, subjects will be provided with a card stating that they are participating in a trial and giving contact address(es) and telephone number(s) of relevant trial site staff. Subjects should be instructed to return the card to the investigator at the last trial visit or to destroy the card after the last visit.

For screening failures the screening failure form must be completed with the reason for not continuing in the trial. Serious and non-serious adverse events from screening failures must be transcribed by the investigator into the electronic case report form (eCRF). Follow-up of serious adverse events (SAEs) must be carried out according to Section [12.3](#). A screening failure session must be made in the IV/WRS. The case book must be signed.

Re-screening of subjects having signed the informed consent is not allowed.

Once all data relating to Visit 1 have been obtained, these must be reviewed by the investigator to ensure that the subject is eligible to continue the trial.

### **8.1.3 Fasting visits**

The subjects should attend several visits in a fasting state (see Section [2](#)). Fasting is defined as having consumed only water since midnight. An exception from this is the Follow-up visit where fasting is defined as having consumed only water for the last two hours.

Subjects are allowed to take the IMP and oral concomitant medication during fasting if following the conditions outlined in Section [5.3](#). An exception is at three visits in the oral treatment arms where peak and trough PK will be measured and the oral IMP will be administered at the site (see Section [8.4.10](#)).

If a subject attends a fasting visit in a non-fasting condition or a peak and trough PK meeting having taken the oral dose the same day, then blood sampling and body weight must be re-scheduled within the visit window. The date for each fasting assessment or PK assessment at the specific visit must be updated accordingly in the eCRF. All other assessments can be performed. Re-scheduling of fasting visits or peak and trough PK visits are not considered unscheduled visits.

### **8.1.4 Unscheduled visits**

An unscheduled visit can be scheduled at any time at the discretion of the investigator. An unscheduled visit form must be completed in the eCRF indicating the reason for the visit. Coming to the site for any of the following reasons should not be considered as unscheduled visits:

- dispense additional trial products
- dispense additional auxiliary supplies
- re-test of blood- or urine sampling (not allowed if results are available)

In case of additional trial products being dispensed, a dispensing session should be made in the IV/WRS selecting additional medication.

### **8.1.5 Visit 2 (Randomisation)**

For procedures and assessments performed at randomisation, see Section [2](#).

Visit 2 will take place within two weeks after Visit 1.

The randomisation session must be performed in the IV/WRS which will allocate the Dispensing Unit Number (DUN) of the IMP to be dispensed to the subject. Eligible subjects will be randomised into one of nine treatment arms.

The IMP will be dispensed to the subject by the trial site staff, hospital pharmacy staff or equivalent at each visit during the trial from randomisation to last visit before the End-of-treatment visit (see Section 2). The investigator must document that subjects are instructed in oral IMP administration at every dispensing visit.

For subjects randomised to the s.c. injection, the investigator must document that a direction for use (DFU) is handed out at each dispensing visit. Ability and willingness to self-inject can be tested by administration of injections with a test pen for subjects who do not have prior experience with self-injection. Novo Nordisk will provide the test pens.

Please see Section 9 for further information about the IMPs.

### **8.1.6 Visit numbers**

For visit numbers, timing of site visits and visit windows during the trial period, please refer to the flow chart, Section 2. Planned visits can be re-scheduled within the allowed visit window.

It is the responsibility of the investigator to ensure that all site visits occur according to the flow chart (see Section 2).

### **8.1.7 Visits 3-10 (Treatment)**

For procedures and assessments performed at visits 3, 4, 5, 6, 7, 8, 9, and 10, see the flow chart in Section 2.

### **8.1.8 Visits 11-12 (End-of-treatment and Follow-up)**

All subjects must attend the End-of-treatment visit (Visit 11) which should be scheduled when the subject has completed the treatment with the IMP and a Follow-up visit (Visit 12) should be performed at least 5 weeks after (+5 days visit window). A completion session must be performed in the IV/WRS. Please see the flow chart for details (Section 2).

The Follow-up visit serves to collect AEs, technical complaints, hyperglycaemic episodes and blood samples for anti-semaglutide antibodies.

### **8.1.9 Visit 11X (End-of-Trial – premature discontinuation)**

For subjects who discontinue the IMP prematurely the End-of-treatment visit (Visit 11) should be scheduled shortly after the subject has discontinued the IMP. The Follow-Up visit (Visit 12) should be scheduled at least 5 weeks (+5 days visit window) after treatment discontinuation. Treatment discontinuation and drug accountability sessions must be done in the IV/WRS. Please see the flow chart for details (Section 2).

Subjects who discontinue their IMP prematurely must also be requested to attend the visit End-of-trial – premature discontinuation (Visit 11X) at the time of the scheduled end of treatment (i.e., 26 weeks after randomisation). Data on AEs and the primary endpoint from this final visit are important for the data quality of the trial.

### **8.1.10 Withdrawals**

If a subject is withdrawn from the trial, the investigator must aim to undertake procedures similar to those for visit 11 (End-of-treatment) as soon as possible, and the Follow-up visit at least 5 weeks after. The end-of-trial form must be completed and the subject should return all trial products to the site to have final drug accountability performed. Drug accountability must be performed even if the subject is not able to come to the trial site. A treatment discontinuation session must be performed in the IV/WRS (see Section [10](#)). The case book must be signed.

Although a subject is not obliged to give his/her reason(s) for withdrawing from a trial, the investigator must make a reasonable effort to ascertain the reason(s), while fully respecting the subject's rights. Where the reasons are obtained, the primary reason for discontinuation must be specified on the end-of-trial form in the eCRF (see Section [6.5.1](#)):

### **8.1.11 Investigator's assessment**

Review of diaries, laboratory reports, ECGs, eye examination (fundoscopy/fundus photography), physical examination and patient reported outcome (PRO) questionnaires must be documented with the investigator's or delegated site staff's dated signature either on the front page of the documents or in the subject's medical record. The documents should be signed prior to the following visit and must be retained at the investigator site as source documentation.

For ECGs and eye examinations the evaluations must be in the following categories:

- Normal
- Abnormal
  - Was the finding clinically significant? (yes/no)

For laboratory report values outside the reference range, the investigator must specify whether the value is non-clinically or clinically significant. All laboratory printouts must be signed and dated by the investigator on the day of evaluation.

In case of abnormal clinically significant findings (e.g., in laboratory reports, ECGs, eye examination or physical examination), the investigator must state a comment in the subject's medical record and record this on the concomitant illness form in the eCRF at the screening or randomisation visits. At subsequent visits any clinically significant changes or new clinically significant findings must be reported as an AE according to Section [12.2](#).

If clarification of entries or discrepancies in the diary or PROs is needed, the subject must be questioned and a conclusion made in the subject's medical record. Care must be taken not to bias the subject.

## **8.2 Subject related information**

### **8.2.1 Concomitant illness and medical history**

A **concomitant illness** is any illness that is present at the start of the trial (i.e., at the screening visit or found as a result of screening procedure). The concomitant illness should be recorded in the eCRF.

**Medical history** is a medical event that the subject has experienced in the past. Only medical history considered relevant by the investigator should be reported.

The information collected for concomitant illness and medical history should include diagnosis, date of onset and date of resolution or continuation, as applicable.

Any change to a concomitant illness should be recorded during the trial. A clinically significant worsening of a concomitant illness must be reported as an AE.

**Smoking habit:** Details of smoking habit must be recorded at the first visit. Smoking is defined as smoking at least one cigarette, cigar or pipe daily. The collected information should include whether or not the subject smokes or has smoked. If the subject smokes or has smoked, record approximately when the subject started smoking and, if applicable, when the subject stopped smoking.

**Diabetes complications** should be captured in the medical history or concomitant illness form and should include:

- diabetic retinopathy
- diabetic neuropathy
- diabetic nephropathy
- macroangiopathy including peripheral vascular disease
- other complications where relevant

### **8.2.2 Concomitant medication**

A **concomitant medication** is any medication, other than the trial products, which is taken during the trial, including the screening and follow-up periods.

Details of any concomitant medication must be recorded at the first visit. Changes in concomitant medication must be recorded at each visit as they occur.

The information collected for each concomitant medication includes:

- trade name or generic name
- indication
- start and stop date or continuation
- total daily dose (only applicable for antidiabetic medication)

If a change is due to an AE, then this must be recorded and reported according to Section [12.2](#). If the change influences the subject's eligibility to continue in the trial, the monitor must be informed.

### **8.2.3 Demography**

Demography will be recorded in the eCRF at screening and consists of:

- date of birth or age (according to local regulation)
- sex
- race (according to local regulation)
- ethnicity (according to local regulation)

### **8.2.4 Diagnosis of diabetes**

The date of diagnosis of T2D will be recorded in the eCRF at screening.

### **8.2.5 Diabetes treatment history**

The dose and the date of initiating treatment with metformin will be recorded in the eCRF at screening if the subject is currently treated with metformin.

### **8.2.6 History of gallbladder disease**

Information related to history of gallbladder disease (i.e., pancreatitis, gallstone disease, cholecystitis) will be recorded in the eCRF at screening visit.

### **8.2.7 History of cardiovascular disease**

Information related to history of cardiovascular disease (CVD) (i.e., heart failure including NYHA class, hypertension or ischaemic stroke) or other risk factors for CVD will be recorded in the eCRF at screening visit.

### **8.2.8 Renal impairment history**

Information related to history of renal impairment will be recorded in the eCRF at screening visit.



## 8.2.9 Post-dose fasting routines

The fasting routines following oral trial product administration should be recorded in the subject's diary handed out at Visit 10 and transcribed to the eCRF by the investigator at the End-of-treatment visit to determine the usual fasting time after tablet ingestion during the trial.

The post-dose fasting routines are recorded as time in minutes from IMP administration until the usual time of:

- food consumption (i.e., meal or snack)
- drinking (i.e., any beverage including water)

## 8.3 Assessments for efficacy

### 8.3.1 Blood samples

Blood samples will be drawn according to flow chart (see Section [2](#)) and analysed at the central laboratory to determine levels of the following efficacy laboratory parameters:

Glucose metabolism:

- HbA<sub>1c</sub>
- Fasting plasma glucose (FPG)
- Fasting insulin
- Fasting C-peptide
- Fasting glucagon

Lipids (all fasting):

- Total cholesterol
- LDL-cholesterol
- VLDL-cholesterol
- HDL-cholesterol
- Triglycerides
- Free fatty acids

### 8.3.2 Body measurements

#### Body weight

Body weight should be measured without shoes and only wearing light clothing. It should be recorded with one decimal and using the same set of scales throughout the trial (i.e., kg or lb)

#### Height

Height is measured without shoes in centimetres or inches and recorded to nearest ½ cm or ¼ inch.

## Waist circumference

The waist circumference is defined as the minimal abdominal circumferences located midway between the lower rib margin and the iliac crest.

Three consecutive measurements of waist circumference should be performed and recorded in the eCRF. The waist circumferences will be measured using a non-stretchable measuring tape. It should be recorded to the nearest ½ cm or ¼ inch using the same measuring tape throughout the trial.

The subject should be measured in a standing position with an empty bladder and wearing light clothing with accessible waist. The subject should be standing with arms down their side and feet together. The tape should touch the skin but not compress soft tissue and twists in the tape should be avoided. The subject should be asked to breathe normally and the measurement should be taken when the subject is breathing out gently.

## BMI

BMI will be captured in the eCRF using the equation:

$$\text{BMI} = \text{Body weight (kg)} / (\text{Height (m)} \times \text{Height (m)}) \quad [\text{kg/m}^2 = \text{lb/in}^2 \times 703]$$

### 8.3.3 Patient reported outcomes

The PRO questionnaire used in this trial is SF-36v2™.

The questionnaire should be completed by the subject as specified in the flow chart, see Section [2](#), preferably before any other trial-related activities. It takes approximately ten minutes to complete the questionnaire.

The questionnaire is checked by the investigator for completion and unreported AEs (see Section [8.1.11](#)). The investigator or site staff must date and sign the document and enter the results in the eCRF.

The SF-36v2™ questionnaire will be used to assess subjects overall Health related Quality of Life and can also be used to estimate Quality-Adjusted Life Year which is used in cost effectiveness calculations. This instrument contains 36 items and measures the individual overall health related quality of life on eight domains: physical functioning, role functioning, bodily pain, general health, vitality, social functioning, role emotional and mental health.

## 8.4 Assessments for safety

### 8.4.1 Hypoglycaemic episodes

Plasma glucose should always be measured and recorded when a hypoglycaemic episode is suspected.

All plasma glucose values:

- $\leq 3.9$  mmol/L (70 mg/dL) or
- $> 3.9$  mmol/L (70 mg/dL) when they occur in conjunction with hypoglycaemic symptoms,

should be recorded by the subject in the diary. These must be transcribed into the eCRF (hypoglycaemic episode form) throughout the trial from Visit 1-12.

The record should include the following information:

- Date and time of hypoglycaemic episode
- The plasma glucose level before treating the episode (if available)
- Whether the episode was symptomatic
- Whether the subject was able to treat him/herself
- Date and time of last trial product administration prior to episode
- Type of last trial product prior to episode
- Date and time of last main meal prior to episode
- Whether the episode occurred in relation to increased physical activity

The answer to the question: “Was subject able to treat him/herself?” must be answered “No” if oral carbohydrates, glucagon or IV glucose had to be administered to the subject by another person. Oral carbohydrates should not be given if the subject is unconscious.

A hypoglycaemic episode form must be filled in for each hypoglycaemic episode. If the hypoglycaemic episode fulfils the criteria for an SAE then an AE form and an electronic safety information form (eSIF) must also be filled in (see Section [12.2](#))

For all FPG values measured by central laboratory that meet the definition of a hypoglycaemic episode, a hypoglycaemic episode form must be completed in the eCRF.

### 8.4.2 Blood samples

Blood samples will be drawn according to flow chart (see Section [2](#)) and will be analysed at the central laboratory to determine levels of the following safety laboratory parameters:

Haematology:

- Differential count (basophils, eosinophils, lymphocytes, monocytes and neutrophils)

- Erythrocytes
- Haematocrit
- Haemoglobin
- Leucocytes
- Thrombocytes

Biochemistry:

- Alanine aminotransferase
- Albumin
- Alkaline phosphatase
- Amylase
- Aspartate aminotransferase
- Bilirubin, total
- Calcium, total
- Calcium, albumin corrected (ionized)
- Creatine kinase
- Creatinine
- Lipase
- Potassium
- Sodium
- Urea

Hormone:

- Calcitonin (see Section [8.4.11](#))

Pregnancy test:

- Serum or plasma human chorionic gonadotropin (hCG)

### 8.4.3 Pregnancy test

Females of childbearing potential will have a serum pregnancy test (i.e., beta-hCG) performed as specified in Section [2](#) or as required by local law.

Pregnancy testing will not be required (unless required by local law) for subjects who are post-menopausal (defined as women who have undergone a hysterectomy, bilateral oophorectomy or bilateral tubal ligation or for women above the age of 50, who have been without menstrual period for at least 1 year).

#### 8.4.4 Urinalysis

Subjects will be asked to bring first morning urine during the trial (see Section 2). The urine samples will be analysed at the central laboratory to determine levels of the following safety laboratory parameters:

- Urinary albumin to creatinine ratio
- Urinalysis by urine dip-stick: erythrocytes, protein, glucose and ketones, pH

#### 8.4.5 Antibodies

Blood samples will be drawn during the trial and analysed at specialised laboratory for determination of serum antibodies to semaglutide, including cross reactivity to endogenous GLP-1 (see flow chart, section 2). Samples positive for antibodies against semaglutide will be further characterised for *in vitro* neutralising effect towards semaglutide. In addition, samples positive for antibodies cross-reacting with endogenous GLP-1 will be analysed for *in vitro* neutralising effect towards endogenous GLP-1. Furthermore, samples drawn at randomisation may be used for calculations of the neutralising effect in the *in vitro* neutralising antibody assays. The *in vitro* neutralising assays will be performed by Novo Nordisk.

At randomisation, the antibody assessment must be done pre-dose.

#### 8.4.6 Vital signs

The method for measuring systolic and diastolic blood pressure needs to follow the standard clinical practice at site but as a minimum; the following guideline must be adhered to: Avoid caffeine, smoking and exercise at least 30 minutes prior to measuring the blood pressure. The blood pressure should be measured in a sitting position, with the legs uncrossed, the back and arms supported and positioned at heart level. Subjects should be sitting for at least five minutes before the first measurement is taken. The subject should not talk during the measurement. Pulse (beats per minute) should be measured after resting for five minutes in a sitting position. Results are recorded in the eCRF.

In case of an “abnormal, clinically significant finding”, the investigator must record the finding on the medical history or concomitant illness form if present at screening.

Any new abnormal, clinically significant finding during the trial and any clinically significant worsening from baseline must be reported as an AE.

#### 8.4.7 Electrocardiogram – 12-lead

12-lead ECG will be performed during the trial (see Section 2). All ECGs will undergo central assessment.

Sites will be informed of the central ECG evaluation in case this evaluation reveals an abnormal ECG reading. If the abnormality represents an unreported AE, SAE or MESI, such findings must be reported if the investigator finds the abnormality clinically significant (see Section [8.1.11](#)).

Additional ECG recordings can be performed at the investigators site at the investigator's discretion at other visits than the planned ECG visits. All such ECGs will undergo central assessment.

An ECG performed for any reason unrelated to the trial within 30 days prior to the randomisation visit is acceptable as Visit 2 data, provided no clinical symptoms suggestive of cardiac disease has occurred in the meantime.

If the ECG is performed before the subject has signed the informed consent form, it must be documented in the medical records that the reason for performing the procedure was not related to this trial.

For electronic central ECG evaluation vendor details, see Attachment I.

#### **8.4.8 Fundoscopy/fundus photography**

Fundoscopy/fundus photography will be performed at randomisation by the investigator or according to local practice. Results of the fundoscopy/fundus photography will be reviewed, signed and dated by the investigator (see Section [8.1.11](#)). Dilation is not a requirement.

If fundoscopy/fundus photography has been performed within 90 days before the screening visit, the procedure does not need to be repeated unless worsening of visual function since the last examination. A subject cannot be randomised without results confirming there is not retinopathy or maculopathy requiring acute treatment.

If the fundoscopy/fundus photography is performed before the subject has signed the informed consent form, it must be documented in the medical records that the reason for performing the procedure was not related to this trial.

#### **8.4.9 Physical examination**

A physical examination will be performed by the investigator according to local procedures, see Section [2](#)).

A physical examination must include:

- General appearance
- Central and peripheral nervous system
- Head, ears, eyes, nose, throat, neck
- Thyroid gland
- Respiratory system
- Cardiovascular system
- Gastrointestinal system including mouth
- Musculoskeletal system
- Skin
- Lymph node palpation

The results are recorded as described in Section [8.1.11](#).

#### **8.4.10 Pharmacokinetics**

Blood samples for the population PK will be drawn from all subjects for bioanalysis of the plasma concentrations of semaglutide at Visits 3-11 (see flow chart, Section [2](#)). The investigator must record the exact time for drawing the blood samples in the laboratory requisition form and transcribe the data to the eCRF.

Subjects on oral treatment will also have PK measured pre-dose and post-dose (trough and peak) at three visits (see Section [2](#)). At the visits for trough and peak PK measurements, the investigator needs to ensure that the subjects on oral treatment follow these procedures:

- Attend the visit fasting
- Have the IMP administered at the visit (i.e., subjects must not self-administrate the tablet on the day of the visit)
- Ingest tablet at site
- Eat a meal 30-60 minutes after IMP administration
- Have an extra blood sample drawn 60-90 minutes after IMP administration

The exact time points of trial drug administration, start of meal and blood sampling must be recorded in the eCRF by the investigator.

For the oral treatments, the date and time of the latest trial drug administration must be recorded by the subject in the subject diary and transcribed to the eCRF by the investigator.

For the s.c. semaglutide arm, the date, time, dose and injection site of the two latest trial drug administrations must be transcribed to the eCRF by the investigator based on the subject's diary.

#### **8.4.11 Calcitonin**

Blood samples for the measurement of calcitonin concentration will be drawn as per flow chart (see Section [2](#)). Calcitonin values  $\geq 20$  ng/L will be submitted to an independent committee of thyroid experts. The Calcitonin Monitoring Committee (CMC) will provide guidance to the investigator with regards to treatment and further investigations. It is recommended that screening failure subjects with a calcitonin value  $\geq 10$  ng/L are referred to a thyroid expert for further evaluation. For details please refer to Appendix A.

#### **8.5 Laboratory assessments**

The laboratory analyses will mainly be performed by a central laboratory. For analyses of anti-semaglutide antibodies (see Section [8.4.5](#)) and semaglutide plasma concentrations (see Section [8.4.10](#)) a special laboratory will be used. Also, in the situation described in Section [8.6.2.1](#) a special laboratory will be used. Laboratory samples comprise both urine and blood samples. Descriptions of assay methods, laboratory supplies and procedures for collecting, handling, storing and shipping samples and information regarding who will perform the assessments will be described in the laboratory manual provided by the central laboratory (for central and special laboratory details, see Attachment I).

Samples will be coded in order to keep subject identity anonymous.

Laboratory samples not collected on the day of the actual visit should preferably be collected on another day within the visit window as stated in the flow chart (see Section [2](#)). Please note that a laboratory sample pertaining to a specific visit must always be reported to that visit.

For some of the samples collected during the trial, subjects must attend the relevant site visits fasting (fasting is defined in Section [8.1.3](#)).

At three visits (see Section [2](#)), the subjects on oral treatment must attend the relevant site without having taken the trial product the same day to have PK measured pre-dose and post-dose (trough and peak), see Section [8.4.10](#).

The central laboratory will provide laboratory results to the investigator on an on-going basis and the investigator must review all laboratory results for concomitant illnesses and AEs and report these according to Section [12.2](#).

An exception to this is that anti-semaglutide antibody and semaglutide plasma concentration results will not be available to the investigator during the trial. These results will be provided to the investigator upon request after the completion of the clinical trial report (CTR).

All laboratory samples will be destroyed at the latest at the completion of the CTR, except samples obtained for anti-semaglutide antibody analysis which may be kept up to ten years or stored until



approval by health authorities. Antibody samples will only be analysed if requested by the health authorities or for safety.

The laboratory equipment may provide analyses not requested in the protocol but produced automatically in connection with the requested analyses according to specifications in the laboratory standard operating procedures. Such data will not be transferred to the trial database, but abnormal values must be reported to the investigator. The investigator must review all laboratory results for concomitant illnesses and AEs and report these according to this protocol.

## 8.6 Other assessments

### 8.6.1 Subject diary

The subject must be provided with diaries at all visits until the End-of-treatment visit. Entries in the diary are only to be made by the subject.

The investigator/delegate should instruct the subject in recording the following data in the diary:

- For all subjects:
  - date and time of first IMP administration
  - hypoglycaemic episodes
  - concomitant medication
  - AEs
- For subjects treated with oral semaglutide:
  - date and time of last IMP administration prior to each visit
  - post-dose fasting routines during the trial and recorded at the End-of-treatment visit
- For subjects treated with s.c. semaglutide:
  - date, time, dose and injection site of the last two IMP administrations before each visit

The diaries should be collected at the following visit. The recordings must be reviewed as described in Section [8.1.11](#).

### 8.6.2 Additional safety assessments

#### 8.6.2.1 Thyroidectomy, tissue sample and genetic testing

##### Thyroidectomy pathology slides

In case a subject undergoes a thyroidectomy (partial or total) for any reason during the trial the subject will be asked to inform the investigator prior to the operation.

In addition to the review of the thyroid tissue routinely made by the hospital pathology laboratory, the pathology slides of the thyroid tissue will be sent centrally for a second review by a pathologist with expertise in thyroid and C-cell pathology. The central pathologist will be blinded to both

randomised treatment and the diagnosis from the hospital pathology laboratory. Both the hospital pathology report and the central pathology report will be reviewed by an independent Event Adjudication Committee (EAC) (see Section [12.7.2](#)). Once the samples are re-examined they will be sent back to the hospital pathology laboratory.

The investigator will be informed of the results of central pathology report and if C-cell pathology is confirmed by the EAC, the CMC will provide guidance to the investigator with regards to treatment and further investigations.

#### **Thyroid tissue sample collection in case of thyroidectomy (not applicable for Israel)**

If C-cell pathology is confirmed (i.e., hyperplastic or neoplastic thyroid C-cells) the subject will be asked to consent to have a sample of the removed thyroid tissue tested for RET Y1062 phosphorylation in the thyroid C-cells, if allowed by local law. The tissue sample will be destroyed after examination.

#### **Blood sample for genetic testing in case of confirmed C-cell pathology (not applicable for Israel)**

In addition, the subject will also be asked to consent to be tested (blood sample) to identify germline RET gene mutations associated with MEN2 syndrome. This RET gene mutation detection will only be conducted if the EAC has confirmed C-cell abnormality (medullary carcinoma or C-cell hyperplasia). The genetic testing will only be performed if allowed by local law.

The blood sample should be collected at the first visit to the clinic after the confirmation of C-cell pathology. The extraction of DNA will be performed by the central laboratory whereas the identification of gene mutations will be performed by a specialised laboratory. The blood sample will be destroyed as soon as the genetic analysis is complete.

#### **8.6.2.2 Assessments in case of suspicion of acute pancreatitis**

In case of acute, severe persistent abdominal pain characteristic of acute pancreatitis, the IMP must promptly be interrupted until pancreatitis is excluded (see Section [6.5.2](#)). Appropriate additional examinations should be performed according to local practice. If acute pancreatitis is not confirmed trial product should be re-initiated.

If pancreatitis is confirmed (as a minimum 2 of 3):

- characteristic abdominal pain
- blood amylase and/or lipase >3x upper normal range (UNR)
- characteristic findings on ultrasound/CT/MRI

appropriate treatment and careful monitoring of the subject should be initiated. Trial product should not be re-initiated but subject should remain in the trial. The event should be reported as a MESI and will undergo assessment by the EAC (see Section [12.7.2](#)).

### **8.6.2.3 Assessments in case of suspicion of severe hypersensitivity**

If a severe immediate hypersensitivity reaction to the IMP is suspected, blood sampling for assessment of anti-semaglutide IgE antibodies and anti-semaglutide binding antibodies should be collected after a suitable washout period (minimum 5 weeks). In these cases, it is also recommended to test for tryptase (total and/or mature tryptase) within three hours of the reaction.

Furthermore, a tryptase sample should be taken at the same time as the IgE sample is obtained. Tryptase concentrations (if measured) as well as results of anti-semaglutide antibody and IgE-isotype anti-semaglutide antibodies should be sent to Novo Nordisk.

## **8.7 Subject compliance**

Subject compliance will be assessed by monitoring of drug accountability. Prior to visits where drug accountability is performed the subject will be asked to return all used, partly used and unused IMPs. The investigator must assess the amount of IMPs returned compared to what was dispensed at the last dispensing visit and, in case of discrepancies, question the subject.

Throughout the trial the investigator will remind the subjects to follow the trial procedures and requirements to ensure subject compliance. If a subject is found to be non-compliant, the investigator will remind the subject of the importance of following the instructions given including taking the trial products as prescribed.

## 9 Trial supplies

Trial supplies comprise trial products and auxiliary supplies. Additional details regarding trial supplies can be found in the Trial Materials Manual (TMM).

Trial products must not be dispensed to any person not included in the trial.

For injectable products, the trial product must not be used if:

- it does not appear clear and colourless
- it has been frozen
- it has been exposed to excessive heat or direct sunlight

### 9.1 Trial products

The following trial products will be provided by Novo Nordisk A/S, Denmark:

**Table 9–1 Trial products (IMP)**

| Active substance | Strength   | Dosage form                                                      |
|------------------|------------|------------------------------------------------------------------|
| Semaglutide      | 2.5 mg     | tablet                                                           |
| Semaglutide      | 5.0 mg     | tablet                                                           |
| Semaglutide      | 10 mg      | tablet                                                           |
| Semaglutide      | 20 mg      | tablet                                                           |
| Semaglutide      | 40 mg      | tablet                                                           |
| Placebo          | N/A        | tablet                                                           |
| Semaglutide      | 1.34 mg/mL | solution for injection,<br>1.5 mL pre-filled PDS290 pen-injector |

N/A: not applicable

The IMPs for oral use will be packed in 15 mL Duma containers (lid with desiccant). Each container will include ten tablets. Subjects in the oral treatment arms will be instructed in how to ingest the tablets following the condition rules. All tablets containing semaglutide or placebo are identical with regards to visual appearance, taste and smell.

The semaglutide, solution for injection will be delivered open-label with the pre-filled PDS290 pen-injector. The direction for use of the pen-injector will be given to each subject in the s.c. treatment arm at each dispensing visit.

For further details, please see the current edition of the IB (Oral Administration of Semaglutide (NN9924) Edition 5<sup>6</sup> and any updates hereof.

Metformin may be used at the discretion of the investigator. Metformin will not be supplied by Novo Nordisk. However, metformin will be reimbursed if required by the country's Health Authority or independent ethics committee/Institutional Review Board (IEC/IRB).

## 9.2 Labelling

Labelling of the trial products will be in accordance with Annex 13<sup>12</sup>, local regulations and trial requirements.

Each investigator site will be supplied with sufficient trial products for the trial on an on-going basis controlled by the IV/WRS. Dispensing unit numbers (DUNs) will be distributed to the sites according to enrolment and randomisation.

The investigator or delegate must document that direction for use of the device is handed out at each dispensing visit. This could be by signature in the subject's medical record.

## 9.3 Storage

Tablets containing the SNAC enhancer are susceptible to degradation in humid environment. It is important to protect the tablets by following the storage conditions in [Table 9-2](#). Before opening the Duma container for the first time, the container must acclimatise for 1 hour at room temperature due to risk of condensation.

**Table 9-2 Storage conditions for trial products**

| Trial product                                          | Storage conditions (not-in-use)                                                                                                                                                  | In-use conditions                                                                                                                                                                                                                            | In-use time*        |
|--------------------------------------------------------|----------------------------------------------------------------------------------------------------------------------------------------------------------------------------------|----------------------------------------------------------------------------------------------------------------------------------------------------------------------------------------------------------------------------------------------|---------------------|
| Semaglutide and placebo tablets                        | <ul style="list-style-type: none"> <li>Must be stored in a refrigerator (2°C to 8°C) / (36°F to 46°F)</li> <li>Do not freeze</li> <li>Protect from light and humidity</li> </ul> | <ul style="list-style-type: none"> <li>Store below 30°C / 86°F</li> <li>Do not refrigerate</li> <li>Do not freeze</li> <li>Protect from light and humidity</li> <li>Container must be stored with lid tightly closed at all times</li> </ul> | Use within 4 weeks  |
| Semaglutide, solution for injection                    | <ul style="list-style-type: none"> <li>Must be stored in a refrigerator (2°C to 8°C) / (36°F to 46°F)</li> <li>Do not freeze</li> <li>Protect from light</li> </ul>              | <ul style="list-style-type: none"> <li>Store below 30°C / 86°F</li> <li>Do not refrigerate</li> <li>Do not freeze</li> <li>Protect from light</li> </ul>                                                                                     | Use within 1 month  |
| Semaglutide placebo, solution for injection (test pen) | <ul style="list-style-type: none"> <li>Must be stored in a refrigerator (2°C to 8°C) / (36°F to 46°F)</li> <li>Do not freeze</li> <li>Protect from light</li> </ul>              | <ul style="list-style-type: none"> <li>For single use only</li> </ul>                                                                                                                                                                        | For single use only |

\* In-use time starts when first dose is taken.

The investigator must ensure the availability of proper storage conditions, record and evaluate the temperature. The investigator must inform Novo Nordisk immediately if any trial product has been stored outside defined conditions (e.g., outside temperature range).

Trial products that have been stored improperly must not be dispensed to any subject before it has been re-evaluated and approved for further use by Novo Nordisk. The investigator must take appropriate action to ensure correct storage.

#### **9.4 Drug accountability and destruction**

Drug accountability is the responsibility of the investigator.

Returned trial product (used/partly used or unused including empty packaging material) can be stored at room temperature and must be stored separately from non-allocated trial product.

The trial products will be dispensed to each subject as required according to treatment group. The IV/WRS will allocate trial product to the subject at each dispensing visit. The correct dispensing unit number(s) (DUN(s)) must be dispensed to the subject.

The investigator or delegated person is responsible for ensuring that:

- Trial products are not dispensed to any person not included in the trial
- Drug accountability is performed using the IV/WRS drug accountability module
- Subjects are instructed to return all used, partly used and unused trial product including empty packaging material at every visit
- Returned trial product(s) (used, partially used or unused including empty packaging material) is kept and stored separately from non-allocated trial products

Destruction will be done according to local procedures after accountability is finalised and verified by the monitor. Destruction of products must be documented.

#### **9.5 Auxiliary supplies**

Auxiliary supplies provided by Novo Nordisk:

- Blood glucose meters, including lancets, plasma-calibrated test strips and control solutions.
- Direction for use for devices (only subjects on s.c. semaglutide)
- Needles for pre-filled pen systems (only subjects on s.c. semaglutide)
- Test pens containing semaglutide placebo (only subjects on s.c. semaglutide)

Test pens containing semaglutide placebo, solution for injection, 1.5 mL pre-filled PDS290 pen-injector will be supplied at the randomisation visit to subjects randomised to injection treatment. Training with the test pen is optional and recommended for subjects without prior injection experience to ensure the subject's willingness and ability to self-inject. The test pen should be administered once and the training be performed at the clinical site. The subjects must not take the test pens home.

Details of the auxiliary supplies are provided in the TMM.

## 10 Interactive voice/web response system

A trial-specific IV/WRS will be set up which can be accessed at any time via the internet or telephone. Access to the IV/WRS must be restricted to and controlled by authorised persons.

IV/WRS is used for:

- Screening
- Screening failure
- Randomisation
- Medication arrival
- Dispensing
- Treatment discontinuation
- Completion
- Code break
- Drug accountability
- Data change

IV/WRS user manuals will be provided to each trial site.

During the trial, only DUNs allocated by the IV/WRS are allowed to be dispensed to a subject. This will ensure that:

- needed stock is available at a site for the subjects
- no allocation of IMP that will expire before the next dispensing contact
- drug accountability can be made in IV/WRS

If a subject needs IMP between dispensing visits, the investigator must make an additional dispensing session in the IV/WRS.

## 11 Randomisation procedure and breaking of blinded codes

The trial is partially blinded. The oral semaglutide arms and the oral placebo arm are double-blind whereas the s.c. semaglutide active comparator arm is open-label.

The randomisation is stratified according to one stratification factor with two strata: Treatment with metformin at screening (yes/no).

### 11.1 Breaking of blinded codes

If the trial site needs to break the code, Novo Nordisk should, if possible, be contacted before the code is broken. The IV/WRS will notify Novo Nordisk (monitor and the Global Safety department) immediately after the code is broken.

The code for a particular subject may be broken in a medical emergency if knowing the actual treatment would influence the treatment of the subject. Whenever a code is broken the person breaking the code must print the Code Break Confirmation Notification generated by the IV/WRS, record the reason and sign and date the document.

When the code is broken, the treatment allocation will be accessible to the investigator and the Novo Nordisk Global Safety department. If IV/WRS is not accessible at the time of code break the monitor should be contacted and if monitor cannot get access the IV/WRS vendor helpdesk should be contacted. Contact details are listed in Attachment I.

If the code has been broken, the subject should be discontinued from trial product but be asked to continue in the trial (see Section [8.1.9](#)).

If the subject is withdrawn after the code has been broken, a treatment discontinuation session should be completed in IV/WRS.



## 12 Adverse events, technical complaints and pregnancies

### 12.1 Definitions

#### Adverse event

An **adverse event** is any untoward medical occurrence in a subject administered a product, and which does not necessarily have a causal relationship with this treatment.

An AE can therefore be any unfavourable and unintended sign (including an abnormal laboratory finding), symptom or disease temporally associated with the use of a product, whether or not considered related to the product.

An AE includes:

- A clinically significant worsening of a concomitant illness.
- A clinical laboratory adverse event (CLAE): a clinical laboratory abnormality which is clinically significant, i.e. an abnormality that suggests a disease and/or organ toxicity and is of a severity that requires active management. Active management includes active treatment or further investigations, for example change of medicine dose or more frequent follow-up due to the abnormality.

The following should **not** be reported as AEs:

- Pre-existing conditions, including those found as a result of screening procedures (pre-existing conditions should be reported as medical history or concomitant illness).
- Pre-planned procedures unless the condition for which the procedure was planned has worsened from the first trial-related activity after the subject has signed the informed consent.
- Non-serious hypoglycaemia is an AE, but is reported on a hypoglycaemic episode form instead of on an AE form (see Section [8.4.1](#))

The following definitions are used when assessing an AE:

- **Severity assessment:**
  - **Mild** – no or transient symptoms, no interference with the subject's daily activities, acceptable
  - **Moderate** – marked symptoms, moderate interference with the subject's daily activities, but still acceptable
  - **Severe** – considerable interference with the subject's daily activities; unacceptable
- **Causality assessment**

The following terms and definitions are used when assessing the relationship between an AE and the relevant trial product(s):

  - **Probable** – Good reason and sufficient documentation to assume a causal relationship

- **Possible** – A causal relationship is conceivable and cannot be dismissed
- **Unlikely** – The event is most likely related to aetiology other than the trial product
- **Final outcome of an AE**
  - **Recovered/resolved** – The subject has fully recovered, or by medical or surgical treatment the condition has returned to the level observed at the first trial-related activity after the subject signed the informed consent.
  - **Recovering/resolving** – This term is only applicable if the subject has completed the trial or has died from another AE. The condition is improving and the subject is expected to recover from the event.
  - **Recovered/resolved with sequelae** – The subject has recovered/resolved from the condition, but with lasting effect due to a disease, injury, treatment or procedure. If a sequela meets an SAE criterion, the AE must be reported as an SAE.
  - **Not recovered/not resolved** – The condition of the subject has not improved and the symptoms are unchanged, or the outcome is not known at the time of reporting.
  - **Fatal** – This term is only applicable if the subject died from a condition related to the reported AE. Outcomes of other reported AEs in a subject before he/she died should be assessed as “recovered/resolved”, “recovering/resolving”, “recovered/resolved with sequelae” or “not recovered/not resolved”. An AE with fatal outcome must be reported as an SAE.
  - **Unknown** – This term is only applicable if the subject is lost to follow-up.

### Serious adverse event

A **serious adverse event** is an experience that at any dose results in any of the following:

- Death
- A life-threatening<sup>a</sup> experience
- In-patient hospitalisation<sup>b</sup> or prolongation of existing hospitalisation
- A persistent or significant disability or incapacity<sup>c</sup>
- A congenital anomaly or birth defect
- Important medical events that may not result in death, be life threatening<sup>a</sup> or require hospitalisation<sup>b</sup> may be considered an SAE when – based on appropriate medical judgement – they may jeopardise the subject and may require medical or surgical intervention to prevent one of the outcomes listed in this definition of SAE<sup>d</sup>. Suspicion of transmission of infectious agents via trial product must always be considered an SAE

<sup>a</sup> The term “life threatening” in the definition of SAE refers to an event in which the subject was at risk of death at the time of the event. It does not refer to an event which hypothetically might have caused death if it was severe.

<sup>b</sup> The term “hospitalisation” is used when a subject:

- Is admitted to a hospital or in-patient, irrespective of the duration of physical stay, or
- Stays at the hospital for treatment or observation for more than 24 hours

Medical judgement must always be exercised, and when in doubt, the hospital contact should be regarded as a hospitalisation. Hospitalisations for administrative, trial-related and social purposes do not constitute AEs and should therefore not be reported as AEs or SAEs. Hospital admissions for surgical procedures, planned before trial inclusion, are not considered AEs or SAEs.

<sup>c</sup> A substantial disruption of a subject’s ability to conduct normal life functions (e.g., following the event or clinical investigation the subject has significant, persistent or permanent change, impairment, damage or disruption in his/her body function or structure, physical activity and/or quality of life).

<sup>d</sup> For example intensive treatment in an emergency room or at home of allergic bronchospasm, blood dyscrasias or convulsions that do not result in hospitalisation, or development of drug dependency or drug abuse.

### **Non-serious adverse event**

A non-serious AE is any AE which does not fulfil the definition of an SAE.

### **Medical event of special interest**

A medical event of special interest (MESI) is an event which, in the evaluation of safety, has a special focus. A MESI is an AE (SAE or non-serious AE) which fulfils one or more of the below defined MESI criteria.

1. Fatal Events (All events with fatal outcome) (A)
2. Acute Coronary Syndrome (Myocardial Infarction, Hospitalization for Unstable Angina) (A)
3. Cerebrovascular Events (Stroke, Transient Ischemic Attack) (A)
4. Coronary Revascularization Procedure (A)
5. Heart Failure requiring Hospital Admission (A)
6. Pancreatitis or clinical suspicion of pancreatitis (A)
7. Neoplasms (A)
8. Thyroid Disease ((A) if thyroidectomy is required)
9. Medication errors concerning trial products:
  - Administration of wrong drug
  - Wrong route of administration
  - Administration of a high dose with the intention to cause harm (e.g., suicide attempt)
  - Administration of a lower or higher dose than intended (e.g., taking more than the planned number of tablets); however, the administered dose must deviate from the intended dose to

an extent where clinical consequences for the trial subject were likely to happen as judged by the investigator, although not necessarily did happen

MESIs marked with an ‘(A)’ in the list above will undergo adjudication by an independent EAC (see Section [12.7.2](#)).

Any event confirmed or suspected to be a MESI must be reported. In case the sponsor identifies potentially missed MESIs through predefined review of available data, the investigator will be asked to reconsider if this is a MESI. However, MESIs should not be reported for screening failures.

For further information regarding definitions of MESIs and an overview of which events that should undergo adjudication, please refer to Appendix C.

When reporting a MESI the following forms must be completed: AE form, eSIF, specific MESI follow-up questions (MESI form) and if applicable, the Event Adjudication Document Collection Form (only events for adjudication) in the eCRF.

### **Technical complaint**

A technical complaint is any written, electronic, or oral communication that alleges product (medicine or device) defects. The technical complaint may be associated with an AE, but does not concern the AE itself.

Examples of technical complaints:

- The physical or chemical appearance of trial products (e.g., discoloration, particles or contamination)
- The packaging material (e.g., leakage, cracks, rubber membrane issues or errors in labelling text)
- Problems related to devices (e.g., to the injection mechanism, dose setting mechanism, glucose measurement, push button or interface between the pen and the needle)

## **12.2 Reporting of adverse events**

All events meeting the definition of an AE must be collected and reported. This includes events from the first trial-related activity after the subject has signed the informed consent until the end of the post-treatment follow-up period. The events must be recorded in the applicable eCRF forms in a timely manner (see timelines below and [Figure 12-1](#)).

During each contact with the trial site staff, the subject must be asked about AEs and technical complaints, for example by asking: “Have you experienced any problems since the last contact?”

All AEs, either observed by the investigator or reported by the subject, must be reported by the investigator and evaluated. Novo Nordisk assessment of expectedness is performed according to the following reference document: IB (Oral Administration of Semaglutide (NN9924)), Edition 5<sup>6</sup> and any updates hereof.

All AEs must be recorded by the investigator on an AE form. The investigator should report the diagnosis, if available. If no diagnosis is available, the investigator should record each sign and symptom as individual AEs using separate AE forms.

For SAEs, an eSIF must be completed in addition to the AE form. If several symptoms or diagnoses occur as part of the same clinical picture, one safety information form can be used to describe all the SAEs.

MESIs, regardless of seriousness, must be reported using both the AE form, the safety information form and a MESI form. The MESI form is an electronic form tailored to collect specific information related to the individual MESIs. For MESIs qualifying for event adjudication, an Event Adjudication Document Collection Form will also have to be completed in the eCRF. The Event Adjudication Document Collection Form is a check list of clinical data to be provided from the site.

The AE form for a non-serious AE should be signed when the event is resolved or at the end of the trial.

#### **Timelines for initial reporting of AEs:**

The investigator must complete the following forms in the CRF/eCRF within the specified timelines:

- **SAEs:** The AE form **within 24 hours** and the safety information form **within 5 calendar days** of the investigator's first knowledge of the SAE

Both forms must be signed within 7 calendar days from the date the information was entered in the eCRF.

- **SAEs fulfilling the MESI criteria:** In addition to above, the MESI form **within 14 calendar days** of the investigator's first knowledge of the AE
- **Non-serious AE fulfilling the MESI criteria:** The AE form, and safety information form and MESI form **within 14 calendar days** of the investigator's first knowledge of the event.

If a MESI fulfils the Event Adjudication criteria the investigator must complete the Event Adjudication Document Collection Form within 14 calendar days of the investigator's first knowledge of the adverse event.

If the eCRF is unavailable, the concerned AE information must be reported on paper forms and sent to Novo Nordisk by fax, e-mail or courier within the same timelines as stated above. When the eCRF becomes available again, the investigator must re-enter the information on the appropriate forms in the eCRF.

Contact details (fax, telephone, e-mail and address) are provided in the investigator's trial file.

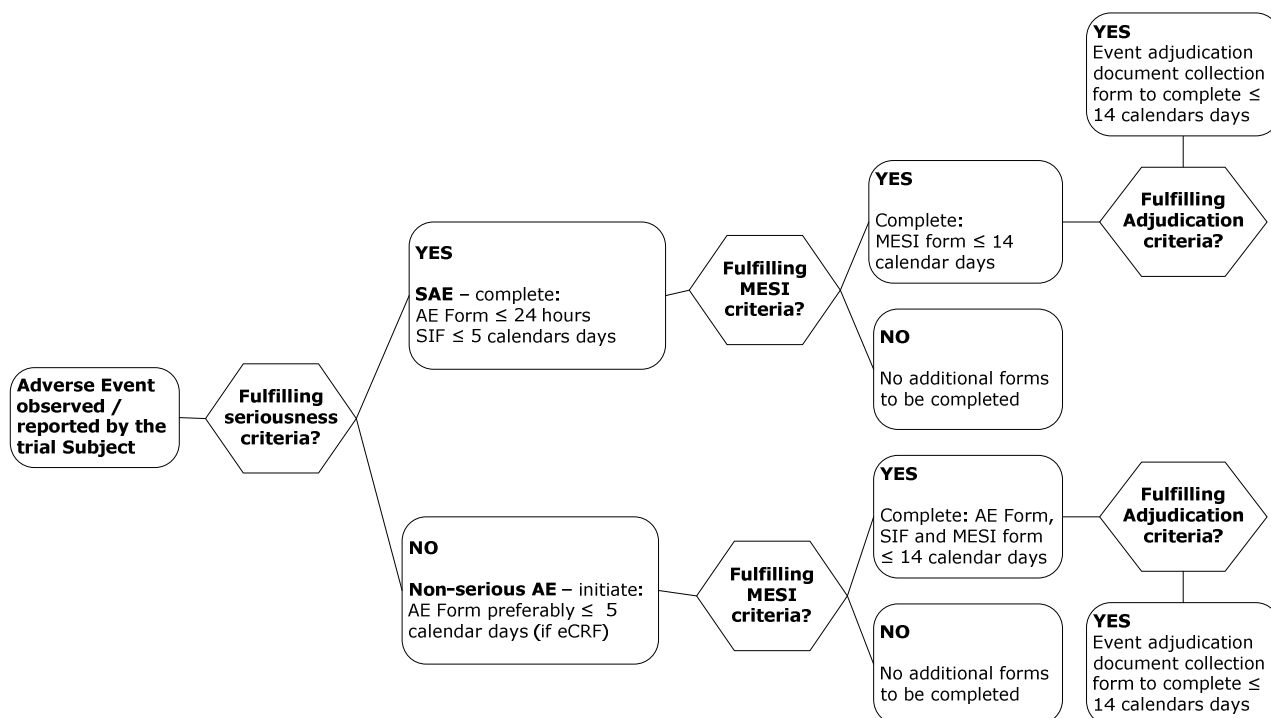

**Figure 12–1 Initial reporting of AEs**

**Reporting of trial product-related SUSARs by the sponsor:**

Novo Nordisk will notify the investigator of trial product-related suspected unexpected serious adverse reactions (SUSARs) in accordance with local requirements and GCP<sup>1</sup>. In addition, the investigator will be informed of any trial-related SAEs that may warrant a change to any trial procedure.

In accordance with regulatory requirements, Novo Nordisk will inform the regulatory authorities, including EMA, of trial product-related SUSARs. In addition, Novo Nordisk will inform the IRBs/IECs of trial product-related SUSARs in accordance with local requirement and GCP<sup>1</sup>, unless locally this is an obligation of the investigator.

### 12.3 Follow-up of adverse events

During and following a subject's participation in the trial, the investigator should ensure that adequate medical care is provided to the subject for any AE, including significant laboratory values related to the trial. The investigator should inform the subject when medical care is needed for AE(s) of which the investigator becomes aware.

The investigator must record follow-up information by updating the forms in the eCRF.

Follow up information must be reported to Novo Nordisk according to the following:

- **SAEs:** All SAEs must be followed up until the outcome of the event is “recovered/resolved”, “recovered/resolved with sequelae” or “fatal”, and until all queries have been resolved. Cases of chronic conditions, cancer or AEs ongoing at time of death (where death is due to another AE) may be closed with the outcome “recovering/resolving” or “not recovered/not resolved”. Cases can be closed with the outcome of “recovering/resolving” when the subject has completed the follow-up period and is expected by the investigator to recover.

The SAE follow-up information should only include new (e.g., corrections or additional) information and must be reported **within 24 hours** of the investigator's first knowledge of the information. This is also the case for previously non-serious AEs which subsequently become SAEs. The applicable forms must be signed within 7 calendar days from the date the new information was entered in the eCRF.

- **Non-serious AEs:** Non-serious AEs must be followed until the outcome of the event is “recovering/resolving”, “recovered/resolved” or “recovered(resolved with sequelae” or until the end of the follow-up period stated in the protocol, whichever comes first, and until all queries related to these AEs have been resolved. Cases of chronic conditions, cancer or AEs ongoing at time of death (where death is due to another AE) may be closed with the outcome “recovering/resolving” or “not recovered/not resolved”. Cases can be closed with the outcome of “recovering/resolving” when the subject has completed the follow-up period and is expected by the investigator to recover.
- **Non-serious AE fulfilling the MESI criteria:** Follow-up information on MESIs should only include new (e.g., corrections or additional) information and must be reported **within 14 calendar days** of the investigator's first knowledge of the information. This is also the case for previously non-serious AEs which subsequently fulfil the MESI criteria.

The investigator must record follow-up information on non-serious AEs by updating the AE form in the eCRF.

The investigator must ensure that the worst case severity and seriousness of an event is kept throughout the trial. A worsening of an unresolved AE must be reported as follow up with re-assessment of severity and/or seriousness of the event.

Queries or follow-up requests from Novo Nordisk must be responded to **within 14 calendar days** from the date of receipt of the request, unless otherwise specified in the follow-up request.

## **12.4 Technical complaints and technical complaint samples**

### **12.4.1 Reporting of technical complaints**

All technical complaints on any of the following products:

- Semaglutide tablets
- Placebo tablets
- Semaglutide for s.c. injection, solution for injection, 1.5 mL pre-filled PDS290 pen injector
- Semaglutide placebo for s.c. injection, solution for injection, 1.5 mL pre-filled PDS290 pen-injector (test pen)
- Novo Nordisk needles

which occur from the time of first usage of the product until the time of the last usage of the product, must be collected and reported to Customer Complaint Center, Novo Nordisk.

Contact details (fax, e-mail and address) are provided in the investigator's trial file.

The investigator must assess whether the technical complaint is related to any AEs, SAEs and/or MESI.

Technical complaints must be reported on a separate technical complaint form for each product listed. If the technical complaint involves more than one code number, lot number or DUN, a technical complaint form for each code number, lot number or DUN must be completed.

The investigator must complete the technical complaint form in the eCRF within the following timelines of the trial site obtaining knowledge of the technical complaint:

- Technical complaint assessed as related to an SAE **within 24 hours**
- All other technical complaints **within 5 calendar days**

If the eCRF is unavailable or when reporting a technical complaint that is not subject related, the information must be provided on a paper form by fax, e-mail or courier to Customer Complaint Center, Novo Nordisk, within the same timelines as stated above.



#### **12.4.2 Collection, storage and shipment of technical complaint samples**

The investigator must collect the technical complaint sample and notify the monitor **within 5 calendar days** of obtaining the sample at trial site. The monitor must coordinate the shipment to Customer Complaint Center, Novo Nordisk (the address is provided in the investigator's trial file) and ensure that the sample is sent as soon as possible. A print of the technical complaint form must be sent with the sample.

The investigator must ensure that the technical complaint sample contains the code number and, if available, the DUN.

If the technical complaint sample is unobtainable, the investigator must specify on the technical complaint form why it is unobtainable.

Storage of the technical complaint sample must be done in accordance with the conditions prescribed for the product. The shipment of the technical complaint sample should be done in accordance with the same conditions as for storage (see Section 9).

#### **12.5 Pregnancies**

Female subjects must be instructed to notify the investigator immediately if they become pregnant during the trial. The investigator must report any pregnancy in subjects who have received trial product(s).

The investigator must follow the pregnancy until the pregnancy outcome and the newborn infant is one month of age.

The investigator must report information about the pregnancy, pregnancy outcome, and health of the newborn infant(s), as well as AEs in connection with the pregnancy, and AEs in the foetus and newborn infant.

The following must be collected and reported by the investigator to Novo Nordisk – electronically (e.g., in PDF format), or by fax or courier:

##### **1. Reporting of pregnancy information**

Information about the pregnancy and pregnancy outcome/health of the newborn infant(s) has to be reported on Maternal Form 1A and 1B, respectively.

When the pregnancy outcome is abnormal (i.e., congenital anomalies, foetal death including spontaneous abortion and/or any anomalies of the foetus observed at gross examination or during autopsy), and/or when a congenital anomaly is diagnosed within the first month, further information has to be reported for the female subject on Maternal Form 2. In addition, information from the male partner has to be reported on the Paternal Form, after an informed consent has been obtained from the male partner.

Initial reporting and follow-up information must be reported **within 14 calendar days** of the investigator's first knowledge of initial or follow-up information.

## 2. Reporting of AE information

The investigator has to report AEs in connection with the pregnancy as well as in the foetus and newborn infant(s). The SAEs that must be reported include abnormal outcome, such as foetal death (including spontaneous abortion), and congenital anomalies (including those observed at gross examination or during autopsy of the foetus), as well as other pregnancy complications fulfilling the criteria of an SAE.

### Forms and timelines for reporting AEs:

Non-serious AEs:

- Paper AE form\* **within 14 calendar days** of the investigator's first knowledge of the initial or follow-up information to the non-serious AE

SAEs:

- Paper AE form\* **within 24 hours** of the investigator's first knowledge of the SAE
- Paper safety information form **within 5 calendar days** of the investigator's first knowledge of the SAE
- **SAE follow-up information** to the AE form and/or safety information form **within 24 hours** of the investigator's first knowledge of the follow-up information

\* It must be clearly stated in the AE diagnosis field on the AE form if the event occurred in the subject, foetus or newborn infant.

Any queries or follow-up requests from Novo Nordisk to non-serious AEs, SAEs and pregnancy forms must be responded to by the investigator **within 14 calendar days** from the date of receipt of the request, unless otherwise specified in the follow-up request.

### 12.6 Precautions and/or overdose

There are no specific antidotes to semaglutide. Treatment of an overdose should be symptomatic.

There is a potential risk of hypoglycaemia during dosing with semaglutide. The typical signs and symptoms of confirmed hypoglycaemia include: hunger, slight headache, nausea, light-headedness, palpitations and sweating. Major hypoglycaemia (severe) may produce loss of consciousness. Symptoms of confirmed and not major hypoglycaemia should be treated by ingestion of carbohydrates.

Major hypoglycaemia resulting in loss of consciousness should be treated at the investigator's discretion according to best available medical practise.



The EAC works in accordance with written guidelines included in the EAC Charter describing in details the composition, tasks, responsibilities, and work processes of the committee.

The events will be adjudicated according to FDA requirements and the adjudication vendor will ensure that the EAC gets access to all the documents provided by the investigator. The EAC will initiate the review and may ask for additional information that the investigator needs to provide if it is available.

The EAC will review copies in English (translated if necessary) of medical documentation received in the adjudication packages (e.g., X-ray images, ECGs, ultrasound images, discharge summaries, pathology reports and death certificates). The investigator must provide medical documentation within 4 weeks of event identification.

The assessments made by the EAC will be included in the CTR as well as assessments made by the investigator. However, the adjudication made by an EAC, given its independence and in-depth analysis of each event, will be attributed with greater importance of the two. The outcomes of adjudication will be kept in the clinical trial database.

The following AEs will be adjudicated in this trial:

- Fatal Events (All events with fatal outcome)
- Acute Coronary Syndrome (Myocardial Infarction, Hospitalization for Unstable Angina)
- Cerebrovascular Events (Stroke, Transient Ischemic Attack)
- Coronary Revascularization Procedure
- Heart Failure requiring Hospital Admission
- Pancreatitis or clinical suspicion of pancreatitis
- Neoplasms
- Thyroid Disease (if thyroidectomy is required)

Event adjudication will not be performed for AEs in screening failures.

There are two processes for capturing AEs for adjudication: Direct reporting of MESIs by the investigator and by potential missed MESI process.

Direct reporting of MESI by investigator: For each AE reported in the eCRF, the investigator must complete whether the event in his/her opinion is a MESI (yes/no).

By ticking YES:

- The investigator must specify the type of MESI event being reported
- The investigator must complete the event adjudication document collection form ('adjudication form') in the eCRF according to the timeline specified in Section [12.2](#). This form indicates the data/documents required for adjudication

- For each required document the investigator should specify/indicate when/if the data/document will be available. If a document is unobtainable this needs to be specified. The investigator must provide medical documentation within 4 weeks of event identification

By ticking NO:

All NOs within the relevant MESI category are screened for being potential missed MESI.

- If needed, the investigator will be asked to provide an explanation of why the event is not reported as a MESI (alternative etiology)
- The vendor or EAC can evaluate an event not initially reported as a MESI for adjudication to be adjudicated. In this case the investigator must provide data/documents required for adjudication as soon as possible when receiving a request from Novo Nordisk or the vendor

A site manual will be provided to each site detailing the specifics surrounding the medical documentation that must be provided by site to the adjudication vendor including how this documentation should be provided.

### **12.7.3 Calcitonin monitoring committee**

The CMC will provide recommendations to the investigators with regards to further investigation and treatment of the individual subject (see Appendix A).

## 13 Case report forms

Novo Nordisk will provide a system for the eCRF. This system and support services to the system will be supplied by a vendor.

Ensure that all relevant questions are answered and that no empty data field exists. If a test or an assessment has not been done and will not be available, or if the question is irrelevant (e.g., is not applicable), indicate this according to the data entry instructions.

The following will be provided as paper CRFs:

- Pregnancy forms

In addition paper AE forms, SIF and technical complaint forms will be provided. These must be used when access to the eCRF is revoked (i.e., EDC system not available).

On the paper CRF forms print legibly, using a ballpoint pen. Ensure that all questions are answered, and that no empty data blocks exist. Ensure that no information is recorded outside the data blocks. If a test/assessment has not been done and will not be available, indicate this by writing “ND” (not done) in the appropriate answer field in the CRF. If the question is irrelevant (e.g., is not applicable) indicate this by writing “NA” (not applicable) in the appropriate answer field. Further guidance can be obtained from the instructions in the CRF.

The investigator must ensure that all information is consistent with the source documentation. By electronically signing the case book in the eCRF, the investigator confirms that the information in the eCRF and related forms is complete and correct.

### 13.1 Corrections to case report forms

Corrections to the eCRF data may be made by the investigator or the investigator’s authorised staff. An audit trail will be maintained in the eCRF application containing as a minimum: the old and the new data, identification of the person entering the data, date and time of the entry and reason for the correction.

If corrections are made by the investigator’s authorised staff after the date the investigator has signed the case book, the case book must be signed and dated again by the investigator.

### 13.2 Case report form flow

The investigator must ensure that data are recorded in the eCRF as soon as possible after the visit, preferably within 5 days. Once data have been entered, they will be available to Novo Nordisk for data verification and validation purposes.

At the end of the trial the investigator must ensure that all remaining data have been entered into the eCRF, preferably within 3 days after the last subject's last visit at the site in order to ensure the planned lock of the database.

Site specific eCRF data (in an electronic readable format) will be provided to the trial site before access to the eCRF is revoked. This data must be retained at the trial site.

### **13.3 Paper case report forms**

The pregnancy forms are paper based CRFs. Also, the SIF, technical complaint form and AE form will be provided in paper but are only to be used if for any reason the eCRF is unavailable.

The investigator must ensure that data are recorded in these forms as soon as possible after the visit and ensure that Novo Nordisk receives these forms within the required timelines (see Sections [12.2](#), [12.4.1](#) and [12.5](#)).

Corrections to the data in the CRFs may only be made by drawing a straight line through the incorrect data and then writing the correct entry next to the data that were crossed out. Each correction must be initialled, dated and explained (if necessary) by the investigator or the investigator's authorised staff.

## 14 Monitoring procedures

During the course of the trial, the monitor will visit the trial site to ensure that the protocol is adhered to, that all issues have been recorded, to perform source data verification and to monitor drug accountability. The first monitoring visit will be performed as soon as possible after FSFV and no later than 4 weeks after. The monitoring visit intervals will depend on the outcome of the remote monitoring of the eCRFs, the trial site's recruitment rate and the compliance of the trial site to the protocol and GCP, but will not exceed 4 weeks during the recruitment period (i.e., from FSFV to last subject first visit (LSFV)). After LSFV the monitoring visit intervals will not exceed 8 weeks.

The monitor must be given direct access to source documents (original documents, data and records). Direct access includes permission to examine, analyse, verify and reproduce any record(s) and report(s) that are important to the evaluation of the trial. If the electronic medical record does not have a visible audit trail, the investigator must provide the monitor with signed and dated printouts. In addition the relevant trial site staff should be available for discussions at monitoring visits and between monitoring visits (e.g., by telephone).

All data must be verifiable in source documentation other than the eCRF (except for BMI).

For all data recorded the source document must be defined in a source document agreement at each trial site. There must only be one source defined at any time for any data element.

For screening failures the monitor will ensure that relevant eCRF pages and other trial-related forms containing data from screening failures are completed. For screening failures the following data should be source verified: informed consent, reason for screening failure and AEs, if any.

Source data generated by the trial site can be corrected by another person than the person entering the source data if accepted by local regulations; any correction must be explained, signed and dated by the person making the correction.

The completed diaries will be collected from the subject at each site visit and must be kept as source data at the site. The investigator/delegate must transcribe the data into the eCRF.

The monitor will ensure that the eCRFs are completed on an ongoing basis and within agreed timelines.

Monitors must review the subject's medical records and other source data (e.g., the diaries and PROs) to ensure consistency and/or identify omissions compared to the eCRF. If discrepancies are found, the investigator must be questioned about these.

A follow-up letter (paper or electronic) will be sent to the investigator following each monitoring visit addressing any action to be taken.



## 15 Data management

Data management is always the responsibility of Novo Nordisk. Data management may be delegated under an agreement of transfer of responsibilities to an external contract research organisation (CRO).

Appropriate measures, including encryption of data files containing person identifiable data, will be used to ensure confidentiality of subject data, when they are transmitted over open networks.

Data from central laboratories will be transferred electronically from the laboratory performing the analyses. In cases where laboratory data are transferred via non-secure electronic networks, data will be encrypted during transfer.

The subject and any biological material obtained from the subject will be identified by subject number and trial identification number. Appropriate measures such as encryption or leaving out certain identifiers will be enforced to protect the identity of subjects in all presentations and publications as required by local, regional and national requirements.

## 16 Computerised systems

Novo Nordisk will capture and process clinical data using computerised systems that are described in Novo Nordisk Standard Operating Procedures and IT architecture documentation. The use and control of these systems are documented.

Investigators working on the trial may use their own electronic systems to capture source data.

## 17 Statistical considerations

If necessary, a statistical analysis plan (SAP) may be written in addition to the protocol, including a more technical and detailed elaboration of the statistical analyses. The SAP will be finalised before database lock.

Results from the statistical analysis will generally be presented by two-sided confidence intervals with a confidence level of 95% including a p-value for test of no difference between treatments.

The stratification variable referred to in the following is defined as the two level factor of treatment with metformin (yes/no).

The “planned comparisons between treatment arms” referred to in this section covers the following comparisons: a) between each of the oral semaglutide treatment arms and placebo, b) between the s.c. semaglutide arm and placebo, c) between each of the oral semaglutide treatment arms and s.c. semaglutide, and d) between the three treatment arms with an end dose of 40 mg.

A standard mixed model for repeated measurements (MMRM) will be used in the analysis of the primary and continuous secondary endpoints. The model will include treatment, country and the stratification variable as fixed factors, and the corresponding baseline value as covariate. All factors and the covariate will be nested within visit. Unless otherwise stated, the estimated differences with corresponding two sided p-values and 95% confidence intervals at 26 weeks will be presented for the planned comparisons between treatment arms.

In order to describe the dose-response relation of oral semaglutide and estimate the relative potency vs. s.c. semaglutide with regards to selected key endpoints, an explorative analysis will be conducted. In this model data from oral semaglutide arms using the standard titration scheme will be included. One or both of the treatment arms with an end dose of 40 mg using an alternative titration scheme may be included and pooled with the oral semaglutide arm with an end dose of 40 mg and using the standard titration scheme, if deemed appropriate based on the planned pairwise comparisons between the arms. Data from the placebo arm (corresponding to a dose of zero mg) could be included if deemed appropriate. The model will be developed ad hoc after unblinding and aim for a suitable fit of the dose-response relation using e.g. a linear or a four-parameter logistic relation of the endpoint of interest vs. the logarithm of the dose.

### 17.1 Sample size calculation

The primary endpoint, change from baseline to end of treatment (i.e., after 26 weeks of treatment) in HbA<sub>1c</sub>, will be analysed by the standard MMRM.

In order to demonstrate efficacy of oral semaglutide the sample size is based on an initial comparison of change from baseline to end of treatment (i.e., after 26 weeks of treatment) in HbA<sub>1c</sub>.

between a) the pool of the two treatment arms using standard and fast escalation regimens, respectively, to an end dose of 40 mg and b) placebo.

A standard deviation (SD) of 1.2% for change from baseline in HbA<sub>1c</sub> is chosen as assumption for the sample size calculation. The SD observed in several phase 3 trials of 26 weeks duration with s.c. liraglutide suggests a standard deviation less than 1.1%. However, as it is uncertain if the added variation in exposure compared to s.c. liraglutide will transfer to an added variation in the therapeutic response, a SD of 1.2% is assumed.

In trial NN9535-1821 the withdrawal rate for the doses 0.2 mg-0.8 mg was 16%-24%. In the present trial, GI events are mitigated by dose escalation and based on this the drop-out rate is expected to be 20%, equally distributed among treatment arms. For completers the treatment difference between the pooled 40 mg arm and placebo is expected to be at least 0.64% whereas for dropouts the treatment difference is set conservatively to 0.32%, thus leading to a detectable mean difference of 0.58%. With these assumptions, and using a two-sided t-test with a significance level of 5%, 134 subjects should be randomised to the pooled 40 mg treatment arm and 67 to placebo in order to have 90% power to demonstrate superiority of the pooled 40 mg treatment arm versus placebo. For similarity between the treatment arms, 67 subjects should be randomised in each of the nine treatment arms.

In total, 603 subjects are to be randomised.

## 17.2 Definition of analysis sets

**Full Analysis Set (FAS):** includes all randomised subjects who have received at least one dose and have any post randomisation data. The statistical evaluation of the FAS will follow the intention-to-treat (ITT) principle and subjects will contribute to the evaluation “as randomised”.

**Safety Analysis Set (SAS):** includes all subjects exposed to at least one dose of randomised liraglutide or liraglutide placebo. Subjects in the SAS will contribute to the evaluation “as treated”.

Before data are locked for statistical analysis, a review of all data will take place. Any decision to exclude a subject or single observations from the statistical analysis is the joint responsibility of the members of the study group. Exclusion of data from analyses will be used restrictively and normally no data should be excluded from the FAS. The subjects or observations to be excluded, and the reasons for their exclusion, must be documented and signed by those responsible before database lock. The subjects and observations excluded from analysis sets, and the reason for this, will be described in the CTR.

## 17.3 Primary endpoint

The primary endpoint, change from baseline to end of treatment (i.e., after 26 weeks of treatment) in HbA<sub>1c</sub>, will be analysed by the standard MMRM.

In order to confirm efficacy of oral semaglutide without risk of inflation of the type 1 error an initial comparison of the primary endpoint between a) the pool of the two treatment arms using standard and fast escalation regimens to an end dose of 40 mg and b) placebo. The comparison will be made using the MMRM by estimating the difference between the mean of means in the two 40 mg arms and the mean in placebo. The estimated difference with corresponding two sided p-value and 95% confidence interval at 26 weeks will be presented, and efficacy of oral semaglutide will be considered confirmed if the upper limit of the confidence interval is strictly less than zero.

If efficacy of oral semaglutide is confirmed the planned comparisons between the nine original treatment arms will be evaluated.

Subjects in the FAS and only measurements taken before treatment discontinuation or initiation of rescue therapy will be included in the analysis.

Due to the uncertainty in relation to if the added variation in the exposure in the oral semaglutide arms compared to s.c. liraglutide will transfer to an added variation in the therapeutic response, a sensitivity analysis allowing the within subject unstructured covariance matrix to be fitted separately for each treatment arm will be conducted.

Furthermore, the following sensitivity analyses will be conducted in order to investigate the sensitivity of the results due to the impact of missing values:

- An MMRM similar to the primary analysis but including all data recorded after randomisation regardless of the data being obtained when the subjects have received rescue therapy or have discontinued randomised treatment.
- An analysis of covariance (ANCOVA) model including subjects in the FAS and using imputation of missing values according to the last observation carried forward (LOCF) method. The model will include fixed factors for treatment, country and the stratification variable and the baseline value as covariate. In accordance with the LOCF method, the dependent variable will be the last available value obtained within the 26 weeks period of the study.
- A completer analysis, i.e. an ANCOVA similar to the one above including only data obtained at 26 weeks from subjects who:
  - did not discontinue treatment prematurely
  - did not receive rescue therapy
  - had a valid HbA<sub>1c</sub> assessment at baseline and after 26 weeks of treatment

## **17.4 Supportive secondary endpoints**

### **17.4.1 Efficacy endpoints**

The FAS will be used in all analyses of the supportive secondary efficacy endpoints.

### **Subjects who, after 26 weeks of treatment, achieve (yes/no) HbA<sub>1c</sub> <7% (53 mmol/mol)**

The binary endpoint will be analysed by a logistic regression model which will include fixed factors for treatment and the stratification variable and baseline HbA<sub>1c</sub> as a covariate. Estimated odds ratios with corresponding two sided p-values and 95% confidence intervals at 26 weeks will be presented for the planned comparisons between treatment arms. Missing response data at 26 weeks will be imputed from the MMRM used for the primary analysis of HbA<sub>1c</sub>.

### **Change from baseline to week 26 in body weight, waist circumference and fasting plasma glucose.**

These endpoints will be analysed by the standard MMRM.

### **Change from baseline to week 26 in C-peptide, fasting insulin, glucagon, HOMA-IR, HOMA-B, total cholesterol, LDL-cholesterol, HDL-cholesterol, VLDL-cholesterol, triglycerides and free fatty acids.**

For each endpoint, the assessments at every week will be log-transformed and subsequently analysed by the standard MMRM. The estimated differences and corresponding 95% confidence intervals at 26 weeks will be back transformed and presented as ratios together with the two sided p-values.

The fasting HOMA endpoints (i.e., fasting HOMA-B and HOMA-IR) will be calculated based on fasting insulin and FPG as follows:

1. Fasting HOMA-B (%) =  $20 \times \text{fasting insulin } [\mu\text{U/ml}] / (\text{FPG}[\text{mmol/L}] - 3.5)$
2. Fasting HOMA-IR (%) =  $\text{fasting insulin } [\mu\text{U/ml}] \times \text{FPG } [\text{mmol/L}] / 22.5$

### **PRO outcomes**

The outcomes from the SF-36 in terms of total scores overall and within each domain will be calculated and each of these scores will be analysed by the standard MMRM.

#### **17.4.2 Safety endpoints**

All safety endpoints will be summarised and analysed using the safety analysis set. Unless otherwise specified safety endpoints will be analysed by descriptive statistics only.

### **Adverse events**

All AEs will be coded using the most recent version of the Medical Dictionary for regulatory Activities (MedDRA) coding. A TEAE is defined as an event that has onset date (or increase in severity) on or after the first day of exposure to randomised treatment and no later than the follow-up visit. TEAEs are summarised descriptively, whereas non-treatment emergent AEs are presented in listings.

## Number of confirmed treatment emergent hypoglycaemic episodes

A hypoglycaemic episode will be defined as *treatment emergent* if the onset of the episode occurs on or after the first day of trial product administration and no later than the follow-up visit.

Hypoglycaemic episodes are classified according to the Novo Nordisk classification of confirmed hypoglycaemia and the ADA classification of hypoglycaemia (see [Figure 17-1](#)).

### Confirmed hypoglycaemia

In normal physiology, symptoms of hypoglycaemia occur below a plasma glucose level of 3.1 mmol/L (56 mg/dL)<sup>13</sup>. Therefore, Novo Nordisk has included hypoglycaemia with plasma glucose levels below this cut-off point in the definition of confirmed hypoglycaemia.

*Confirmed* hypoglycaemic episodes are defined as episodes that are:

- severe (i.e., an episode requiring assistance of another person to actively administer carbohydrate, glucagon, or other resuscitative actions) and/or
- biochemically confirmed by a plasma glucose value of <3.1 mmol/L (56 mg/dL), with or without symptoms consistent with hypoglycaemia

### ADA classification of hypoglycaemia

- *Severe hypoglycaemia*: An episode requiring assistance of another person to actively administer carbohydrate, glucagon, or other resuscitative actions.
- *Asymptomatic hypoglycaemia*: An episode not accompanied by typical symptoms of hypoglycaemia, but with a measured plasma glucose concentration  $\leq 3.9$  mmol/L (70 mg/dL)
- *Documented symptomatic hypoglycaemia*: An episode during which typical symptoms of hypoglycaemia are accompanied by a measured plasma glucose concentration  $\leq 3.9$  mmol/L (70 mg/dL).
- *Relative hypoglycaemia*: An episode during which the person with diabetes reports any of the typical symptoms of hypoglycaemia, and interprets those as indicative of hypoglycaemia, but with a measured plasma glucose concentration  $> 3.9$  mmol/L (70 mg/dL).
- *Probable symptomatic hypoglycaemia*: An episode during which symptoms of hypoglycaemia are not accompanied by a plasma glucose determination (but that was presumably caused by a plasma glucose concentration  $\leq 3.9$  mmol/L [70 mg/dL]).

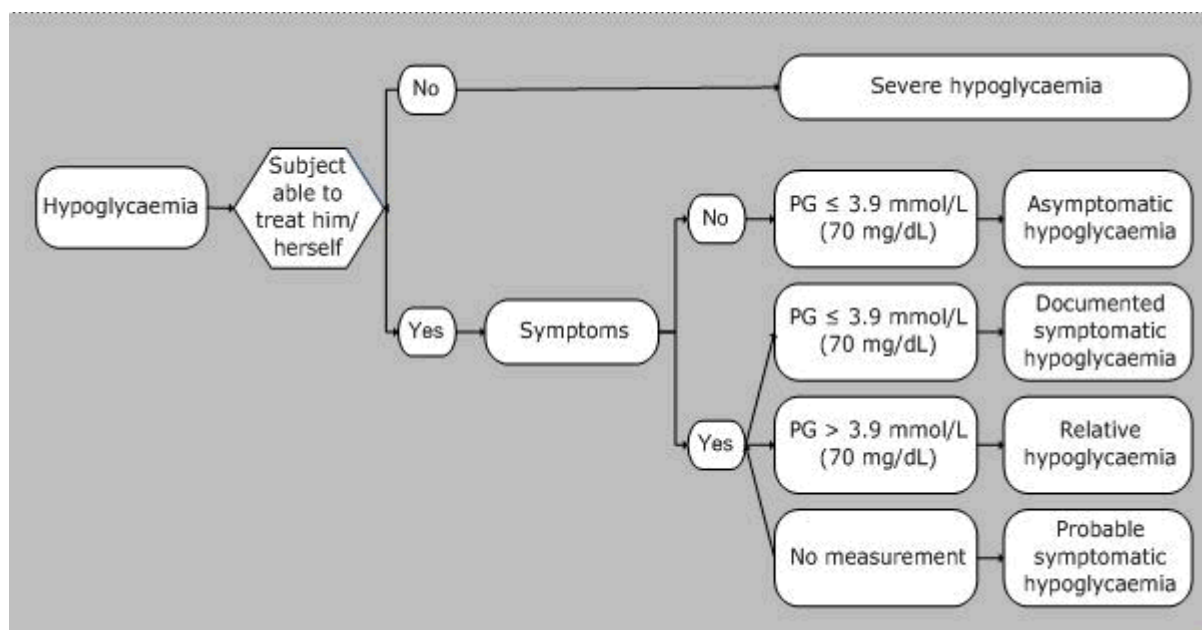

**Figure 17–1 ADA classification of hypoglycaemia**

Data on treatment emergent hypoglycaemic episodes will be summarised descriptively using the above definitions.

The number of confirmed treatment emergent hypoglycaemic episodes during 26 weeks treatment will be analysed using a negative binomial regression model with a log-link function and the logarithm of the time period in which an occurrence of a hypoglycaemic episode is considered treatment emergent as offset. The model will include treatment, country and stratification variable as fixed factors and baseline HbA<sub>1c</sub> as covariate. Estimated rate ratios with corresponding two sided p-values and 95% confidence intervals at 26 weeks will be presented for the planned comparisons between treatment arms.

### **Change in pulse, systolic- and diastolic blood pressure from baseline to after 26 weeks of treatment**

These endpoints will be analysed by the standard MMRM.

### **Change in amylase and lipase from baseline to after 26 weeks of treatment**

For each endpoint, the assessments at every week will be log-transformed and subsequently analysed by the standard MMRM. The estimated differences and corresponding 95% confidence intervals at 26 weeks will be back transformed and presented as ratios together with the two sided p-values.



**Change from baseline to after 26 weeks of treatment in electrocardiogram (ECG), physical examination, laboratory safety variables (haematology, biochemistry, hormone and urinalysis) other than amylase and lipase**

These endpoints will be summarised by descriptive statistics.

**Endpoints related to occurrence of anti-semaglutide antibodies during 26 weeks of treatment: Antibody level during 26 weeks of treatment, anti-semaglutide antibodies (positive/negative), anti-semaglutide antibodies with *in vitro* neutralising effect (positive/negative), anti-semaglutide antibodies cross reacting with endogenous GLP-1 (positive/negative), cross reacting antibodies with *in vitro* neutralising effect to endogenous GLP-1 (positive/negative)**

These endpoints will be summarised by descriptive statistics and correlated to PK and PD.

#### **17.4.3 Pharmacokinetics and/or pharmacodynamics modelling**

If relevant, population PK and PK/PD modelling will be used to evaluate semaglutide exposure and exposure-response relationship after oral and subcutaneous administration in subjects with T2D to inform dose selection in future trials.

The objectives of these exploratory analyses are to:

- assess the dose-dependence of semaglutide exposure in plasma
- explore the effects of covariates on semaglutide exposure
- explore the relationship between semaglutide exposure and response variables of interest

The modelling will be performed by Quantitative Clinical Pharmacology at Novo Nordisk A/S and will be reported separately from the CTR.

## 18 Ethics

The trial will be conducted in compliance with ICH GCP<sup>1</sup> and applicable regulatory requirements, and in accordance with the Declaration of Helsinki<sup>2</sup>.

All subjects will be included after a thorough evaluation in regards to in- and exclusion criteria defined in order to ensure that subjects are eligible for trial treatment. Subjects will be treated within a regimen anticipated to be better than or equal to the treatment they receive at the time of entry into the trial. However, they will have to spend some extra time, as additional assessments and visits to the clinic are required. It is the responsibility of the investigator to ensure the best possible care according to the principles outlined in Diabetes Care 2013, Standards of Medical Care in Diabetes<sup>14</sup>, or any updates thereof.

It is concluded that the potential benefits from participating in the trial outweigh the potential risks. The safety profile of semaglutide generated from the clinical and nonclinical development programme has not revealed any safety issues that would prohibit administration of once-daily oral doses of 2.5-40 mg semaglutide or once-weekly doses of 1.0 mg semaglutide in accordance with the planned clinical trial. Furthermore, a rescue strategy is implemented in this trial to ensure the safety of subjects experiencing deterioration of glycaemic control during the course of the trial to address the concern regarding the placebo arm and the inclusion of patients with an HbA<sub>1c</sub> up to 9.5%. It is concluded that the risk to the subjects in this trial is low and acceptable in view of the benefits a GLP-1 analogue in a tablet formulation would provide to people with T2D.

The trial products may be associated with AEs, but relevant precautions have been implemented in the design and planned conduct of the trial in order to minimise the risks and inconveniences of participation in the trial. These precautions include thorough information regarding the correct administration of the trial products and gradual dose adjustment. Furthermore, subjects are fully informed about possible AEs and inconveniences and will be instructed to contact the investigator in case of any concerns regarding the trial participation.

### 18.1 Informed consent

In seeking and documenting informed consent, the investigator must comply with applicable regulatory requirement(s) and adhere to ICH GCP<sup>1</sup> and the requirements in the Declaration of Helsinki<sup>2</sup>.

Before any trial-related activity, the investigator must give the subject verbal and written information about the trial and the procedures involved in a form that the subject can read and understand. The subject is allowed to bring a companion when the oral information is provided.

The subjects must be fully informed of their rights and responsibilities while participating in the trial as well as possible disadvantages of being treated with the trial products.

The investigator must ensure the subject ample time to come to a decision whether or not to participate in the trial.

A voluntary, signed and personally dated informed consent form will be obtained from the subject before any trial-related activity.

The responsibility for seeking informed consent must remain with the investigator, but the task may be delegated by the investigator to a medically qualified person, in accordance with local requirements. The written informed consent must be signed and personally dated by the person who seeks the informed consent before any trial-related activity.

If information becomes available that may be relevant to the subject's willingness to continue participating in the trial, the investigator must inform the subject in a timely manner and a revised written subject information must be provided and a new informed consent must be obtained.

## **18.2 Data handling**

If the subject is withdrawn from the trial or lost to follow-up, then the subject's data will be handled as follows:

- Data already collected will be retained by Novo Nordisk, entered into the database and used for the trial report
- Safety events will be reported to Novo Nordisk and regulatory authorities according to local and national requirements

If data are used, it will always be in accordance with local law and IRBs/IECs.

## **18.3 Premature termination of the trial and/or trial site**

Novo Nordisk, the investigator, the IRBs/IECs or a regulatory authority may decide to stop the trial, part of the trial or a trial site at any time, but agreement on procedures to be followed must be obtained.

If a trial is suspended or prematurely terminated, the investigator must inform the subjects promptly and ensure appropriate therapy and follow-up. The investigator and/or Novo Nordisk should also promptly inform the IRBs/IECs and provide a detailed written explanation. The relevant regulatory authorities should be informed.

If, after the termination of the trial, the risk/benefit analysis changes, the new evaluation should be provided to the IRBs/IECs in case it has an impact on the planned follow-up of subjects who have participated in the trial. If it does have an impact, the actions needed to inform and protect the subjects should be described.

An interim analysis to allow for premature discontinuation of the trial has not been planned.

## 19 Protocol compliance

Deviations from the protocol should be avoided.

If deviations do occur, the investigator must inform the monitor and the implications of the deviation must be reviewed and discussed.

Deviations must be documented and explained in a protocol deviation by stating the reason, date, and the action(s) taken. Some deviations, for which corrections are not possible, can be acknowledged and confirmed via edit checks in the eCRF or via listings from the clinical database.

Documentation on all protocol deviations must be kept in the investigator's trial file and Novo Nordisk trial master file.

## 20 Audits and inspections

Any aspect of the clinical trial may be subject to audits conducted by Novo Nordisk or inspections from domestic or foreign regulatory authorities or from IRBs/IECs. Audits and inspections may take place during or after the trial. The investigator and the site staff as well as Novo Nordisk staff have an obligation to cooperate and assist in audits and inspections. This includes giving auditors and inspectors direct access to all source documents and other documents at the trial site relevant to the clinical trial. This includes permission to examine, analyse, verify and reproduce any record(s) and report(s) that are relevant to the evaluation of the trial.

## 21 Critical documents

Before a site is allowed to start screening subjects, the following documents must be available to Novo Nordisk:

- Regulatory approval and/or acknowledgement of notification as required
- Approval/favourable opinion from IRBs/IECs clearly identifying the documents reviewed as follows: protocol, any substantial protocol amendments, subject information/informed consent form, any other written information to be provided to the subject and subject recruitment materials
- List of IRB/IEC members and/or constitution
- Curricula vitae of the investigator and sub-investigator(s) (current, dated and signed – must include documented GCP training or a certificate)
- Signed receipt of Investigator's Brochure
- Signed and dated agreement on the final protocol
- Signed and dated agreement on any substantial protocol amendment, if applicable
- Financial agreement(s)
- Source document agreement
- Central laboratory certification and normal ranges
- Insurance statement, if applicable
- Signed and dated Investigator Agreement
- Financial disclosure form for all investigators
- For US trial sites: verification under disclosures per Code of Federal Regulations (CFR) of Financial Conflict of Interest
- For US trial sites: FDA Form 1572 must be completed and signed by each investigator

### **FDA form 1572:**

For US sites:

- Intended for US sites
- Conducted under the IND
- All US investigators, as described above, will sign FDA form 1572

### **FDA form 1572 (for sites outside the US):**

For sites outside the US:

- Intended for participating sites outside of the US
- Not conducted under the IND
- All investigators outside of the US will not sign FDA form 1572

Novo Nordisk will analyse and report data from all sites together.

Protocol  
Trial ID: NN9924-3790  
UTN: U1111-1136-4716  
EudraCT No.: 2012-004994-16

~~CONFIDENTIAL~~

Date: 25 June 2013  
Version: 1.0  
Status: Final  
Page: 89 of 98

**Novo Nordisk**

By signing the protocol, each investigator agrees to comply fully with ICH GCP<sup>1</sup>, applicable regulatory requirements and the Declaration of Helsinki<sup>2</sup>.

By signing the protocol, each investigator also agrees to allow Novo Nordisk making investigator's name and information about site name and address publically available if this is required by national or international regulations.

## 22 Responsibilities

The investigator is accountable for the conduct of the trial at his/her site. If any tasks are delegated, the investigator should maintain a list of appropriately qualified persons to whom he/she has delegated specified significant trial-related duties. The investigator should ensure that there is adequate training for all staff participating in the conduct of the trial. It is the investigator's responsibility to supervise the conduct of the trial and to protect the rights, safety and well-being of the subjects.

A qualified physician, who is an investigator or a sub-investigator for the trial, must be responsible for all trial-related medical decisions.

The investigator must ensure adequate supervision of the conduct of the trial at the trial site.

The investigator will follow instructions from Novo Nordisk when processing data.

The investigator is responsible for filing essential documents (i.e., those documents which individually and collectively permit evaluation of the conduct of a trial and the quality of the data produced) in the investigator's trial file. The documents should be kept in a secure locked facility, so no unauthorized persons can get access to the data. The subject ID list should be kept securely and separate from the personal data.

The investigator will take all necessary technical and organisational safety measures to prevent accidental or wrongful destruction, loss or deterioration of data. The investigator will prevent any unauthorised access to data or any other processing of data against applicable law. The investigator must be able to provide the necessary information or otherwise demonstrate to Novo Nordisk that such technical and organisational safety measures have been taken.

During any period of unavailability, the investigator must delegate responsibility for medical care of subjects to a specific qualified physician who will be readily available to subjects during that time.

The investigator must keep a log of staff and delegation of task(s) at site. The investigator must sign the log of staff and delegation of task(s) at site at the time of delegation of tasks.

If the investigator is no longer able to fulfil the role of investigator (e.g., if he/she moves or retires), a new investigator will be appointed in consultation with Novo Nordisk.

The investigator and site personnel must have sufficient English skills according to their assigned task(s).



Protocol  
Trial ID: NN9924-3790  
UTN: U1111-1136-4716  
EudraCT No.: 2012-004994-16

~~CONFIDENTIAL~~

|          |              |                     |
|----------|--------------|---------------------|
| Date:    | 25 June 2013 | <b>Novo Nordisk</b> |
| Version: | 1.0          |                     |
| Status:  | Final        |                     |
| Page:    | 91 of 98     |                     |

Novo Nordisk will be responsible for the preparation of the protocol, eCRF, supply of trial products and stated equipment, monitoring, data management, statistics and the CTR as documented by Novo Nordisk procedures and internal specific agreements as well as the current GCP guidelines<sup>1</sup>.

Novo Nordisk will provide a system for EDC. This system and support services to the system will be supplied by a vendor. The activities of the vendor will be under the direction and supervision of Novo Nordisk. Furthermore, Novo Nordisk will be responsible for the IV/WRS.

A central laboratory will be responsible for providing all lab supplies for the analysis of all blood and urine samples taken during the trial. All results are received as paper copies at the sites as well as electronic transfer to Novo Nordisk clinical database.

The name of the central laboratories is listed in protocol attachment I.

## 23 Reports and publications

The information obtained during the conduct of this trial is considered confidential, and may be used by Novo Nordisk for regulatory purposes and for the general development of the trial product. All information supplied by Novo Nordisk in connection with this trial shall remain the sole property of Novo Nordisk and is to be considered confidential information. No confidential information shall be disclosed to others without prior written consent from Novo Nordisk. Such information shall not be used except in the performance of this trial. The information obtained during this trial may be made available to other physicians who are conducting other clinical trials with the trial product, if deemed necessary by Novo Nordisk.

The CTR will be reviewed and signed by one or more investigator(s) (signatory investigator) appointed by Novo Nordisk based on their experience in clinical research and input during the analysis phase.

### 23.1 Communication of results

Novo Nordisk commits to communicating, and otherwise making available for public disclosure, results of trials regardless of outcome. Public disclosure includes publication of a paper in a scientific journal, abstract submission with a poster or oral presentation at a scientific meeting, or disclosure by other means.

Novo Nordisk reserves the right to defer the release of data until specified milestones are reached, for example when the CTR is available. This includes the right not to release the results of interim analyses, because the release of such information may invalidate the results of the entire trial.

At the end of the trial, one or more public disclosures may be prepared collaboratively by the investigator(s) and Novo Nordisk. Novo Nordisk reserves the right to postpone publication and/or communication for up to 60 days to protect intellectual property.

The results of this trial will be subject to public disclosure on external web sites according to international regulations, as reflected in the Novo Nordisk Code of Conduct for Clinical Trial Disclosure.

In all cases the trial results will be reported in an objective, accurate, balanced and complete manner, with a discussion of the strengths and limitations. All authors will be given the relevant statistical tables, figures and reports needed to support the planned publication. In the event of any disagreement on the content of any publication, both the investigators' and Novo Nordisk opinions will be fairly and sufficiently represented in the publication.

Where required by the journal, the principal investigator from each trial site will be named in an acknowledgement or in the supplementary material, as specified by the journal.

Novo Nordisk maintains the right to be informed of plans by any investigator to publish and to review any scientific paper, presentation, communication or other information concerning the investigation described in this protocol. Any such communication must be submitted in writing to the Novo Nordisk trial manager before submission for comments. Comments will be given within four weeks from receipt of the planned communication.

### **23.1.1 Authorship**

Authorship of publications should be in accordance with the Uniform Requirements of the International Committee of Medical Journal Editors (sometimes referred to as the Vancouver Criteria<sup>15</sup>).

At the end of the trial, one or more publications (abstracts, posters, manuscripts) will be prepared for submission to scientific congresses and peer-reviewed journals in collaboration between Novo Nordisk and investigator(s) appointed by Novo Nordisk. These investigator(s) must meet the ICMJE authorship criteria to be named authors on publications.

### **23.1.2 Site-specific publication(s) by investigator(s)**

For a multi-centre clinical trial, analyses based on single-site data usually have significant statistical limitations and frequently do not provide meaningful information for healthcare professionals or subjects, and therefore may not be supported by Novo Nordisk. It is a Novo Nordisk policy that such individual reports do not precede the primary manuscript and should always reference the primary manuscript of the trial.

Novo Nordisk reserves the right to prior review of such publications. Further to allow for the primary manuscript to be published as the first, Novo Nordisk asks for deferment of publication of individual site results until the primary manuscript is accepted for publication. As Novo Nordisk wants to live up to the industry publication policy, submission for publication of such primary policy will take place no later than 18 months after trial completion.

### **23.2 Investigator access to data and review of results**

As owner of the trial database, Novo Nordisk has the discretion to determine who will have access to the database.

Individual investigators will have their own research participants' data and will be provided with the randomisation code after results are available.

## 24 Retention of clinical trial documentation and human biospecimens

### 24.1 Retention of clinical trial documentation

Subject's medical records must be kept for the maximum period permitted by the hospital, institution or private practice.

The investigator must agree to archive the documentation (this includes both electronic and paper-based records) pertaining to the trial in an archive after completion or discontinuation of the trial if not otherwise notified. The investigator should not destroy any documents without prior permission from Novo Nordisk. If the investigator cannot archive the documents at the trial site, Novo Nordisk can refer the investigator to an independent archive provider that has a system in place to allow only the investigator to access the files.

The investigator must be able to access his/her trial documents without involving Novo Nordisk in any way. Site-specific CRFs and other subject data (in an electronic readable format or as paper copies or prints) will be provided to the investigator before access is revoked to the systems and/or electronic devices supplied by Novo Nordisk. These data must be retained by the site. If the Novo Nordisk provided data (e.g., the CD-ROM) is not readable during the entire storage period, the investigator can request a new copy, as a copy of all data will be stored by Novo Nordisk.

Novo Nordisk will maintain Novo Nordisk documentation pertaining to the trial for as long as the product is on the market plus 20 years.

The files from the investigator site/institution must be retained for 15 years after the completion of the trial, or longer if required by national regulations. The deletion process must ensure confidentiality of data and must be done in accordance with local regulatory requirements.

### 24.2 Retention of human biospecimens

Serum samples (3-4 mL) of antibodies to semaglutide will be stored at the CRO after finalisation of the CTR (see Section [8.5](#)). The retained antibody samples will only be used for further characterisation of antibodies against semaglutide if required by health authorities or for safety. The samples will remain anonymous (no personal data will be received).

Samples will be stored for up to ten years or until approval by health authorities. They may be transferred from the CRO to Novo Nordisk. Only Novo Nordisk and the CRO/laboratory will have access to the samples.

There are no potential consequences for the subjects or their relatives on the potential use of the antibody samples stored.

## **25 Institutional Review Boards/Independent Ethics Committees and regulatory authorities**

### **IRB/IEC:**

Written approval or favourable opinion must be obtained from IRB/IEC prior to commencement of the trial.

During the trial, the investigator or sponsor, as applicable, must promptly report the following to the IRB/IEC, in accordance with local requirements: updates to IB, unexpected SAEs where a causal relationship cannot be ruled out, substantial protocol amendments, non-substantial protocol amendments according to local requirements, deviations to the protocol implemented to eliminate immediate hazards to the subjects, new information that may affect adversely the safety of the subjects or the conduct of the trial (including new risk/benefit analysis in case it will have an impact on the planned follow-up of the subjects), annually written summaries of the trial status and other documents as required by the local IRB/IEC.

Protocol amendments must not be implemented before approval or favourable opinion according to local regulations, unless necessary to eliminate immediate hazards to the subjects.

The investigator must maintain an accurate and complete record of all submissions made to the IRB/IEC. The records should be filed in the investigator's trial file and copies must be sent to Novo Nordisk.

### **Regulatory Authorities**

Regulatory authorities will receive the clinical trial application (CTA) or clinical trial notification, protocol amendments, reports on SAEs and the CTR according to national requirements.

## 26 Indemnity statement

Novo Nordisk carries product liability for its products, and liability is assumed under the special laws, acts and/or guidelines for conducting clinical trials in any country, unless others have shown negligence.

Novo Nordisk assumes no liability in the event of negligence, or any other liability by the clinics or investigators conducting the trial, or by persons for whom the said site or investigator are responsible.

Novo Nordisk accepts liability in accordance with:

- For Germany: Drug Law dated August 24, 1976 last amended by Second Law for Changes in Regulations on Drugs and Other Issues dated October 19, 2012.
- For Spain: Royal decree 223/2004, of 6th February, establishing the requisites concerning clinical trials.

## 27 References

- 1 International Conference on Harmonisation. ICH Harmonised Tripartite Guideline. Good Clinical Practice. 01-May-1996.
- 2 World Medical Association. Declaration of Helsinki. Ethical Principles for Medical Research Involving Human Subjects. 59th WMA General Assembly, Seoul. 1-Oct-2008.
- 3 Bittner B, McIntyre C, Jordan P, Schmidt J. Drug-drug interaction study between a novel oral ibandronate formulation and metformin. *Arzneimittelforschung* 2011; 61(12):707-713.
- 4 McIntyre C, Schmidt J, Castelli M, Bittner B. Study on the impact of SNAC (sodium N-[8-(2-hydroxybenzoyl) amino] caprylate) on the bioavailability of ibandronate (IBN) in postmenopausal women. *J.Drug Del.Sci.Tech.* 2011, 21 (6) 521-525.
- 5 Investigator's Brochure Semaglutide (subcutaneous administration), Edition 8. June 2013.
- 6 Investigator's Brochure Oral administration of semaglutide (NN9924), Edition 5. June 2013.
- 7 International Conference on Harmonisation; Guidance on M3(R2) Nonclinical Safety Studies for the Conduct of Human Clinical Trials and Marketing Authorization for Pharmaceuticals; availability. Notice. *Fed Regist* 2010; 75(13):3471-3472.
- 8 Emisphere Technologies I. ERP-12/7, clinical trial report: A Randomized, Double-Blind, Multicenter Study Comparing the Safety and Efficacy of Two Dosing Regimens of Oral EMISPHERE SNAC/Heparin with Subcutaneous Enoxaparin Sodium for the Prevention of Venous Thromboembolic Events Following Elective Total Hip Replacement Surgery. Nov. 2002.
- 9 De Angelis C., Drazen JM, Frizelle FA, Haug C, Hoey J, Horton R et al. Clinical trial registration: a statement from the International Committee of Medical Journal Editors. *N Engl J Med* 2004; 351(12):1250-1251.
- 10 Food and Drug Administration Amendments Act (FDAAA), VIII-CLINICAL TRIAL DATABASES, SEC. 801. EXPANDED CLINICAL TRIAL REGISTRY DATA BANK, 27-Sep-2007.
- 11 European Commission. Detailed guidance on the European clinical trials database (EUDRACT Database) April 2003 and successor documents CT 5.1 Amendment describing the Development of EurdaCT- Lot 1 for 1 May 2004 and CT 5.2 EudraCT core dataset.
- 12 European Union. The rules governing medicinal products in the European Union, Volume 4, EU Guidelines to Good Manufacturing Practice Medicinal Products for Human and Veterinary Use; Annex 13, Investigational Medicinal Products - Brussels, February 2010.

- 13 Schwartz NS, Clutter WE, Shah SD, Cryer PE. Glycemic thresholds for activation of glucose counterregulatory systems are higher than the threshold for symptoms. *J Clin Invest* 1987; 79(3):777-781.
- 14 Standards of medical care in diabetes--2013. *Diabetes Care* 2013; 36 Suppl 1:S11-S66.
- 15 International Committee of Medicinal Journal Editors. Uniform Requirements for Manuscripts submitted to Biomedical Journals. *N Engl J Med* 1997; 336:309-315.



Protocol  
Trial ID: NN9924-3790  
UTN: U1111-1136-4716  
EudraCT No.: 2012-004994-16

~~CONFIDENTIAL~~

Date: 21 January 2014  
Version: 3.0  
Status: Final  
Page: 1 of 98

**Novo Nordisk**

## Protocol

### Updated protocol including:

Protocol, Final Version 1.0, dated 25 June 2013

Protocol Amendment no 1, Final Version 1.0, dated 05 September 2013 (Applicable to Sweden)

Protocol Amendment no 2, Final Version 1.0, dated 16 January 2014

**Trial ID: NN9924-3790**

***Multiple dose trial examining dose range, escalation and efficacy of oral semaglutide in subjects with type 2 diabetes***

*Redacted protocol  
Includes redaction of personal identifiable information only.*

**Trial phase: 2**

### Protocol originator:

[REDACTED], [REDACTED]

Clinical Operations 2, Semaglutide & Oral GLP-1

This ~~confidential~~ document is the property of Novo Nordisk. ~~No unpublished information contained herein may be disclosed without prior written approval from Novo Nordisk. Access to this document must be restricted to relevant parties.~~

## Table of contents

|                                                                   | <b>Page</b> |
|-------------------------------------------------------------------|-------------|
| <b>Table of contents</b> .....                                    | <b>2</b>    |
| <b>Table of figures</b> .....                                     | <b>6</b>    |
| <b>Table of tables</b> .....                                      | <b>6</b>    |
| <b>List of abbreviations</b> .....                                | <b>7</b>    |
| <b>1 Summary</b> .....                                            | <b>10</b>   |
| <b>2 Flow chart</b> .....                                         | <b>13</b>   |
| 2.1 Flow chart foot notes .....                                   | 16          |
| <b>3 Background information and rationale for the trial</b> ..... | <b>17</b>   |
| 3.1 Type 2 diabetes mellitus and glucagon-like peptide-1.....     | 17          |
| 3.2 Semaglutide and SNAC .....                                    | 17          |
| 3.2.1 Nonclinical data .....                                      | 18          |
| 3.2.1.1 Thyroid C-cell tumours in rodents .....                   | 19          |
| 3.2.1.2 Teratogenicity in rats.....                               | 19          |
| 3.2.1.3 SNAC toxicology .....                                     | 19          |
| 3.2.2 Nonclinical pharmacology and pharmacokinetics .....         | 20          |
| 3.2.3 Clinical data .....                                         | 21          |
| 3.2.3.1 Data from literature .....                                | 21          |
| 3.2.3.2 Clinical data of s.c. semaglutide.....                    | 21          |
| 3.2.3.3 Clinical data of oral GLP-1 .....                         | 23          |
| 3.2.3.4 Clinical data of SNAC.....                                | 23          |
| 3.3 Risks and benefits of the trial .....                         | 24          |
| 3.4 Rationale for the trial .....                                 | 25          |
| <b>4 Objective(s) and endpoint(s)</b> .....                       | <b>26</b>   |
| 4.1 Objectives .....                                              | 26          |
| 4.1.1 Primary objective .....                                     | 26          |
| 4.1.2 Secondary objectives .....                                  | 26          |
| 4.2 Endpoints .....                                               | 26          |
| 4.2.1 Primary endpoint.....                                       | 26          |
| 4.2.2 Supportive secondary endpoints .....                        | 26          |
| <b>5 Trial design</b> .....                                       | <b>28</b>   |
| 5.1 Type of trial .....                                           | 28          |
| 5.2 Rationale for trial design.....                               | 29          |
| 5.3 Treatment of subjects.....                                    | 29          |
| 5.3.1 Dose levels and escalation regimen for oral dosing.....     | 30          |
| 5.3.2 Dose levels and escalation regimen for s.c. dosing.....     | 30          |
| 5.4 Treatment after end of trial .....                            | 31          |
| 5.5 Rationale for treatment .....                                 | 31          |
| <b>6 Trial population</b> .....                                   | <b>32</b>   |
| 6.1 Number of subjects .....                                      | 32          |
| 6.2 Inclusion criteria .....                                      | 32          |

|          |                                                                |           |
|----------|----------------------------------------------------------------|-----------|
| 6.3      | Exclusion criteria .....                                       | 32        |
| 6.4      | Rescue criteria.....                                           | 33        |
| 6.5      | Withdrawal criteria and discontinuation of trial product ..... | 34        |
| 6.5.1    | Withdrawal from trial .....                                    | 34        |
| 6.5.2    | Discontinuation of trial product.....                          | 34        |
| 6.6      | Rationale for trial population.....                            | 35        |
| <b>7</b> | <b>Milestones .....</b>                                        | <b>36</b> |
| <b>8</b> | <b>Methods and assessments .....</b>                           | <b>37</b> |
| 8.1      | Visit procedures .....                                         | 37        |
| 8.1.1    | Introduction.....                                              | 37        |
| 8.1.2    | Visit 1 (Screening).....                                       | 37        |
| 8.1.3    | Fasting visits .....                                           | 38        |
| 8.1.4    | Unscheduled visits .....                                       | 38        |
| 8.1.5    | Visit 2 (Randomisation).....                                   | 38        |
| 8.1.6    | Visit numbers.....                                             | 39        |
| 8.1.7    | Visits 3-10 (Treatment).....                                   | 39        |
| 8.1.8    | Visits 11-12 (End-of-treatment and Follow-up) .....            | 39        |
| 8.1.9    | Visit 11X (End-of-Trial – premature discontinuation) .....     | 39        |
| 8.1.10   | Withdrawals.....                                               | 40        |
| 8.1.11   | Investigator’s assessment.....                                 | 40        |
| 8.2      | Subject related information.....                               | 41        |
| 8.2.1    | Concomitant illness and medical history .....                  | 41        |
| 8.2.2    | Concomitant medication .....                                   | 41        |
| 8.2.3    | Demography .....                                               | 42        |
| 8.2.4    | Diagnosis of diabetes .....                                    | 42        |
| 8.2.5    | Diabetes treatment history .....                               | 42        |
| 8.2.6    | History of gallbladder disease.....                            | 42        |
| 8.2.7    | History of cardiovascular disease .....                        | 42        |
| 8.2.8    | Renal impairment history.....                                  | 42        |
| 8.2.9    | Post-dose fasting routines .....                               | 43        |
| 8.3      | Assessments for efficacy .....                                 | 43        |
| 8.3.1    | Blood samples.....                                             | 43        |
| 8.3.2    | Body measurements.....                                         | 43        |
| 8.3.3    | Patient reported outcomes.....                                 | 44        |
| 8.4      | Assessments for safety.....                                    | 45        |
| 8.4.1    | Hypoglycaemic episodes .....                                   | 45        |
| 8.4.2    | Blood samples.....                                             | 45        |
| 8.4.3    | Pregnancy test.....                                            | 46        |
| 8.4.4    | Urinalysis.....                                                | 47        |
| 8.4.5    | Antibodies.....                                                | 47        |
| 8.4.6    | Vital signs .....                                              | 47        |
| 8.4.7    | Electrocardiogram – 12-lead.....                               | 47        |
| 8.4.8    | Fundoscopy/fundus photography.....                             | 48        |
| 8.4.9    | Physical examination .....                                     | 48        |
| 8.4.10   | Pharmacokinetics .....                                         | 49        |
| 8.4.11   | Calcitonin.....                                                | 50        |
| 8.5      | Laboratory assessments .....                                   | 50        |

|           |                                                                       |           |
|-----------|-----------------------------------------------------------------------|-----------|
| 8.6       | Other assessments .....                                               | 51        |
| 8.6.1     | Subject diary .....                                                   | 51        |
| 8.6.2     | Additional safety assessments .....                                   | 51        |
| 8.6.2.1   | Thyroidectomy, tissue sample and genetic testing .....                | 51        |
| 8.6.2.2   | Assessments in case of suspicion of acute pancreatitis .....          | 52        |
| 8.6.2.3   | Assessments in case of suspicion of severe hypersensitivity .....     | 53        |
| 8.7       | Subject compliance .....                                              | 53        |
| <b>9</b>  | <b>Trial supplies .....</b>                                           | <b>54</b> |
| 9.1       | Trial products .....                                                  | 54        |
| 9.2       | Labelling .....                                                       | 55        |
| 9.3       | Storage .....                                                         | 55        |
| 9.4       | Drug accountability and destruction .....                             | 56        |
| 9.5       | Auxiliary supplies .....                                              | 56        |
| <b>10</b> | <b>Interactive voice/web response system .....</b>                    | <b>57</b> |
| <b>11</b> | <b>Randomisation procedure and breaking of blinded codes .....</b>    | <b>58</b> |
| 11.1      | Breaking of blinded codes .....                                       | 58        |
| <b>12</b> | <b>Adverse events, technical complaints and pregnancies .....</b>     | <b>59</b> |
| 12.1      | Definitions .....                                                     | 59        |
| 12.2      | Reporting of adverse events .....                                     | 62        |
| 12.3      | Follow-up of adverse events .....                                     | 65        |
| 12.4      | Technical complaints and technical complaint samples .....            | 66        |
| 12.4.1    | Reporting of technical complaints .....                               | 66        |
| 12.4.2    | Collection, storage and shipment of technical complaint samples ..... | 67        |
| 12.5      | Pregnancies .....                                                     | 67        |
| 12.6      | Precautions and/or overdose .....                                     | 68        |
| 12.7      | Committees related to safety .....                                    | 69        |
| 12.7.1    | Novo Nordisk safety committee .....                                   | 69        |
| 12.7.2    | Event adjudication committee .....                                    | 69        |
| 12.7.3    | Calcitonin monitoring committee .....                                 | 71        |
| <b>13</b> | <b>Case report forms .....</b>                                        | <b>72</b> |
| 13.1      | Corrections to case report forms .....                                | 72        |
| 13.2      | Case report form flow .....                                           | 72        |
| 13.3      | Paper case report forms .....                                         | 73        |
| <b>14</b> | <b>Monitoring procedures .....</b>                                    | <b>74</b> |
| <b>15</b> | <b>Data management .....</b>                                          | <b>75</b> |
| <b>16</b> | <b>Computerised systems .....</b>                                     | <b>76</b> |
| <b>17</b> | <b>Statistical considerations .....</b>                               | <b>77</b> |
| 17.1      | Sample size calculation .....                                         | 77        |
| 17.2      | Definition of analysis sets .....                                     | 78        |
| 17.3      | Primary endpoint .....                                                | 79        |
| 17.4      | Supportive secondary endpoints .....                                  | 80        |
| 17.4.1    | Efficacy endpoints .....                                              | 80        |
| 17.4.2    | Safety endpoints .....                                                | 80        |
| 17.4.3    | Pharmacokinetics and/or pharmacodynamics modelling .....              | 83        |

|           |                                                                                                   |           |
|-----------|---------------------------------------------------------------------------------------------------|-----------|
| <b>18</b> | <b>Ethics</b> .....                                                                               | <b>84</b> |
| 18.1      | Informed consent .....                                                                            | 84        |
| 18.2      | Data handling .....                                                                               | 85        |
| 18.3      | Premature termination of the trial and/or trial site .....                                        | 85        |
| <b>19</b> | <b>Protocol compliance</b> .....                                                                  | <b>86</b> |
| <b>20</b> | <b>Audits and inspections</b> .....                                                               | <b>87</b> |
| <b>21</b> | <b>Critical documents</b> .....                                                                   | <b>88</b> |
| <b>22</b> | <b>Responsibilities</b> .....                                                                     | <b>90</b> |
| <b>23</b> | <b>Reports and publications</b> .....                                                             | <b>92</b> |
| 23.1      | Communication of results .....                                                                    | 92        |
| 23.1.1    | Authorship .....                                                                                  | 93        |
| 23.1.2    | Site-specific publication(s) by investigator(s) .....                                             | 93        |
| 23.2      | Investigator access to data and review of results .....                                           | 93        |
| <b>24</b> | <b>Retention of clinical trial documentation and human biospecimens</b> .....                     | <b>94</b> |
| 24.1      | Retention of clinical trial documentation .....                                                   | 94        |
| 24.2      | Retention of human biospecimens .....                                                             | 94        |
| <b>25</b> | <b>Institutional Review Boards/Independent Ethics Committees and regulatory authorities</b> ..... | <b>95</b> |
| <b>26</b> | <b>Indemnity statement</b> .....                                                                  | <b>96</b> |
| <b>27</b> | <b>References</b> .....                                                                           | <b>97</b> |

**Appendix A – Monitoring of calcitonin**

**Appendix B – PRO questionnaire**

**Appendix C – Medical Events of Special Interests (MESI)**

**Attachment I – Global List of key staff and relevant departments**

**Attachment II – Country List of key staff and relevant departments**

## Table of figures

|                                                                             | <b>Page</b> |
|-----------------------------------------------------------------------------|-------------|
| Figure 5–1 Trial design of NN9924-3790.....                                 | 28          |
| Figure 5–2 Dosing and fasting conditions for oral treatment (arms 1-8)..... | 30          |
| Figure 12–1 Initial reporting of AEs.....                                   | 64          |
| Figure 17–1 ADA classification of hypoglycaemia.....                        | 82          |

## Table of tables

|                                                      | <b>Page</b> |
|------------------------------------------------------|-------------|
| Table 9–1 Trial products (IMP).....                  | 54          |
| Table 9–2 Storage conditions for trial products..... | 55          |

## List of abbreviations

|                   |                                    |
|-------------------|------------------------------------|
| ADA               | American Diabetes Association      |
| AE                | adverse event                      |
| ANCOVA            | analysis of covariance             |
| AUC               | area under the curve               |
| BMI               | body mass index                    |
| CMC               | calcitonin monitoring committee    |
| CRF               | case report form                   |
| CT                | computerised axial tomography      |
| CTR               | clinical trial report              |
| CVD               | cardiovascular disease             |
| DFU               | directions for use                 |
| DPP-4             | dipeptidyl peptidase-4             |
| DUN               | dispensing unit number             |
| EAC               | event adjudication committee       |
| ECG               | electrocardiogram                  |
| eCRF              | electronic case report form        |
| EDC               | electronic data capture            |
| EE                | ethinylestradiol                   |
| EMA               | European Medicines Agency          |
| eSIF              | electronic safety information form |
| FAS               | full analysis set                  |
| FDA               | Food and Drug Administration       |
| FPG               | fasting plasma glucose             |
| FSFV              | first subject first visit          |
| GCP               | Good Clinical Practice             |
| GI                | gastrointestinal                   |
| GLP-1             | glucagon-like peptide-1            |
| HbA <sub>1c</sub> | glycosylated haemoglobin           |

|         |                                                    |
|---------|----------------------------------------------------|
| hCG     | human chorionic gonadotropin                       |
| HDL     | high density lipoprotein                           |
| HOMA-B  | homeostasis model assessment of beta-cell function |
| HOMA-IR | homeostasis model assessment of insulin resistance |
| IB      | Investigator's Brochure                            |
| ICMJE   | International Committee of Medical Journal Editors |
| IEC     | independent ethics committee                       |
| IMP     | investigational medicinal product                  |
| IRB     | Institutional Review Board                         |
| IV/WRS  | interactive voice/web response system              |
| LDL     | low density lipoprotein                            |
| LN      | levonorgestrel                                     |
| LOCF    | last observation carried forward                   |
| LSFV    | last subject first visit                           |
| MD      | multiple dose                                      |
| MedDRA  | Medical Dictionary for Regulatory Activities       |
| MEN2    | multiple endocrine neoplasia type 2                |
| MESI    | medical event of special interest                  |
| MMRM    | mixed model for repeated measurements              |
| MRI     | magnetic resonance imaging                         |
| NOAEL   | no observed adverse effect level                   |
| NYHA    | New York Heart Association                         |
| OAD     | oral antidiabetic drug                             |
| OD      | once-daily                                         |
| OW      | once-weekly                                        |
| PD      | pharmacodynamics                                   |
| PK      | pharmacokinetics                                   |
| PRO     | patient reported outcome                           |
| SAE     | serious adverse event                              |



|            |                                                                          |
|------------|--------------------------------------------------------------------------|
| SAP        | statistical analysis plan                                                |
| s.c.       | subcutaneous                                                             |
| SD         | standard deviation                                                       |
| SF-36      | medical outcomes study 36-item short-form health survey                  |
| SIF        | safety information form                                                  |
| SNAC       | sodium N-[8-(2-hydroxybenzoyl) amino] caprylate /<br>salcaprozate sodium |
| SUSAR      | suspected unexpected serious adverse reaction                            |
| T2D        | type 2 diabetes                                                          |
| TEAE       | treatment emergent adverse events                                        |
| $t_{\max}$ | time to maximal concentration                                            |
| TMM        | Trial Materials Manual                                                   |
| USP        | United States Pharmacopeia                                               |
| UTN        | Universal Trial Number                                                   |
| VLDL       | very low density lipoprotein                                             |

# 1 Summary

## Objectives and endpoints:

### Primary objective

- To compare the efficacy on glycaemic control of oral semaglutide in a SNAC formulation against placebo in subjects with T2D

### Key secondary objectives

- To compare the efficacy on glycaemic control of oral semaglutide in a SNAC formulation against s.c. semaglutide in subjects with T2D
- To compare the safety and tolerability of three dose escalation schemes using a single end dose level during 26 weeks administration of oral semaglutide and SNAC in a tablet formulation in subjects with T2D

### Primary endpoint

- Change in HbA<sub>1c</sub> from baseline to after 26 weeks of treatment

### Key secondary endpoints

- Subjects who, after 26 weeks of treatment, achieve (yes/no) HbA<sub>1c</sub> <7% (53 mmol/mol)
- Change in body weight from baseline to after 26 weeks of treatment
- Change in waist circumference from baseline to after 26 weeks of treatment
- Change in body mass index (BMI) from baseline to after 26 weeks of treatment
- Number of treatment emergent adverse events (TEAEs) recorded from baseline until week 31
- Number of confirmed hypoglycaemic episodes recorded from baseline until week 31

### Trial design:

This is a randomised, partially-blinded, multiple-dose, multicentre trial with a total of nine treatment arms; seven oral semaglutide treatment arms, an oral placebo arm and an s.c. semaglutide arm in a parallel design. The trial will include subjects with T2D who have failed on diet and exercise and/or metformin.

Subjects with T2D will be randomised in an equal manner with 67 subjects planned to be randomised per treatment arm. Treatment arms 1-8 will include once-daily dosing of a tablet and will be blinded. Treatment arm 9 features once-weekly s.c. injection. All arms include 26 weeks of treatment and a 5 week follow-up period.

The trial medication will be add-on to previous metformin therapy or as monotherapy in the case where the subject is treated with diet and exercise alone.

### **Trial population:**

A total of 603 subjects with T2D will be randomised.

#### Key inclusion criteria:

- Male or female, age  $\geq 18$  years at the time of signing informed consent
- BMI  $\geq 25$  and  $\leq 40$  kg/m<sup>2</sup>
- Subjects diagnosed with T2D treated with diet and exercise and/or who have been on a stable dose of metformin for at least 30 days prior to screening
- HbA<sub>1c</sub> 7.0-9.5% (53-80 mmol/mol) (both inclusive)

#### Key exclusion criteria

- Subjects on selected oral medication with a narrow therapeutic window, such as warfarin, digoxin, tricyclic antidepressants, lithium, aminophylline, theophylline and anticonvulsants
- History of chronic pancreatitis or idiopathic acute pancreatitis
- Chronic malabsorption, regardless of aetiology
- History of Crohn's disease, ulcerative colitis, or other inflammatory bowel disease
- Treatment with glucose lowering agent(s) other than metformin as stated in the inclusion criteria in a period of 90 days before the screening visit

### **Assessments:**

#### *Efficacy assessment*

Measurements of laboratory parameters (HbA<sub>1c</sub>, glucose metabolism parameters and lipids), BMI and waist circumference. Patient reported outcomes will be based on the SF-36 questionnaire and assessed at baseline and end of treatment.

#### *Safety assessment*

Adverse events, laboratory safety variables (haematology, biochemistry, calcitonin and urinalysis), vital signs, electrocardiograms, physical examinations and hypoglycaemic episodes recorded from the first trial-related activity and until completion of the post treatment follow-up visit of the trial.

#### *PK assessment*

Trough and peak plasma concentrations of semaglutide will be assessed throughout the trial.

### **Trial product(s):**

The investigational medicinal products used in the trial will be for once-daily oral administration as tablets and once-weekly s.c. administration using a pen injector system. The investigational medicinal products are:

Protocol  
Trial ID: NN9924-3790  
UTN: U1111-1136-4716  
EudraCT No.: 2012-004994-16

Date: 21 January 2014  
Version: 3.0  
Status: Final  
Page: 12 of 98

**Novo Nordisk**

- Semaglutide 2.5 mg tablets
- Semaglutide 5.0 mg tablets
- Semaglutide 10 mg tablets
- Semaglutide 20 mg tablets
- Semaglutide 40 mg tablets
- Placebo tablets
- Semaglutide 1.34 mg/mL, solution for injection, 1.5 mL pre-filled PDS290 pen-injector

## 2 Flow chart

| Trial Periods                           | Screening <sup>1</sup> | Randomisation | Treatment |    |    |    |    |    |    |    | End-of-treatment <sup>2</sup> | Follow-up <sup>2</sup> | End-of-trial – premature discontinuation <sup>3</sup> |
|-----------------------------------------|------------------------|---------------|-----------|----|----|----|----|----|----|----|-------------------------------|------------------------|-------------------------------------------------------|
|                                         |                        |               | 3         | 4  | 5  | 6  | 7  | 8  | 9  | 10 |                               |                        |                                                       |
| Visit number                            | 1                      | 2             | 3         | 4  | 5  | 6  | 7  | 8  | 9  | 10 | 11                            | 12                     | 11X                                                   |
| Timing of visit                         | Weeks                  | 0             | 2         | 4  | 6  | 8  | 12 | 16 | 20 | 24 | 26                            | 31                     | 26                                                    |
| Visit window                            | Days                   |               | ±3        | ±3 | ±3 | ±3 | ±5 | ±5 | ±5 | ±3 | ±3                            | +5                     | ±3                                                    |
| <b>SUBJECT RELATED INFO/ASSESSMENTS</b> |                        |               |           |    |    |    |    |    |    |    |                               |                        |                                                       |
| Informed consent                        | x                      |               |           |    |    |    |    |    |    |    |                               |                        |                                                       |
| In- and exclusion criteria              | x                      | x             |           |    |    |    |    |    |    |    |                               |                        |                                                       |
| Concomitant medication                  | x                      | x             | x         | x  | x  | x  | x  | x  | x  | x  | x                             |                        | x                                                     |
| Concomitant illness                     | x                      |               |           |    |    |    |    |    |    |    |                               |                        |                                                       |
| Demography                              | x                      |               |           |    |    |    |    |    |    |    |                               |                        |                                                       |
| Diagnosis of diabetes                   | x                      |               |           |    |    |    |    |    |    |    |                               |                        |                                                       |
| Diabetes treatment history              | x                      |               |           |    |    |    |    |    |    |    |                               |                        |                                                       |
| Medical history                         | x                      |               |           |    |    |    |    |    |    |    |                               |                        |                                                       |
| Smoking habits                          | x                      |               |           |    |    |    |    |    |    |    |                               |                        |                                                       |
| History of gallbladder disease          | x                      |               |           |    |    |    |    |    |    |    |                               |                        |                                                       |
| History of cardiovascular disease       | x                      |               |           |    |    |    |    |    |    |    |                               |                        |                                                       |
| Renal impairment history                | x                      |               |           |    |    |    |    |    |    |    |                               |                        |                                                       |
| Randomisation                           |                        | x             |           |    |    |    |    |    |    |    |                               |                        |                                                       |
| Withdrawal criteria                     |                        | x             | x         | x  | x  | x  | x  | x  | x  | x  | x                             |                        |                                                       |
| Post-dose fasting routines              |                        |               |           |    |    |    |    |    |    |    | x                             |                        |                                                       |
| <b>EFFICACY</b>                         |                        |               |           |    |    |    |    |    |    |    |                               |                        |                                                       |
| Height                                  | x                      |               |           |    |    |    |    |    |    |    |                               |                        |                                                       |
| Body weight                             | x                      | x             | x         | x  | x  | x  | x  | x  | x  | x  | x                             |                        | x                                                     |
| Waist circumference                     |                        | x             | x         | x  | x  | x  | x  | x  | x  | x  | x                             |                        | x                                                     |
| HbA <sub>1c</sub>                       | x                      | x             |           | x  |    | x  |    | x  |    |    | x                             |                        | x                                                     |
| Glucose metabolism                      |                        | x             |           | x  |    | x  |    | x  |    |    | x                             |                        |                                                       |
| Lipids                                  |                        | x             |           |    |    |    |    | x  |    |    | x                             |                        |                                                       |

| Trial Periods                                     | Screening <sup>1</sup> | Randomisation | Treatment |    |    |    |    |    |    |    | End-of-treatment <sup>2</sup> | Follow-up <sup>2</sup> | End-of-trial – premature discontinuation <sup>3</sup> |
|---------------------------------------------------|------------------------|---------------|-----------|----|----|----|----|----|----|----|-------------------------------|------------------------|-------------------------------------------------------|
|                                                   |                        |               | 3         | 4  | 5  | 6  | 7  | 8  | 9  | 10 |                               |                        |                                                       |
| <b>Visit number</b>                               | 1                      | 2             | 3         | 4  | 5  | 6  | 7  | 8  | 9  | 10 | 11                            | 12                     | 11X                                                   |
| <b>Timing of visit</b> Weeks                      | -2                     | 0             | 2         | 4  | 6  | 8  | 12 | 16 | 20 | 24 | 26                            | 31                     | 26                                                    |
| <b>Visit window</b> Days                          |                        |               | ±3        | ±3 | ±3 | ±3 | ±5 | ±5 | ±5 | ±3 | ±3                            | +5                     | ±3                                                    |
| <b>SUBJECT RELATED INFO/ASSESSMENTS</b>           |                        |               |           |    |    |    |    |    |    |    |                               |                        |                                                       |
| PRO questionnaire                                 |                        | x             |           |    |    |    |    |    |    |    | x                             |                        |                                                       |
| <b>SAFETY</b>                                     |                        |               |           |    |    |    |    |    |    |    |                               |                        |                                                       |
| Adverse events                                    |                        | x             | x         | x  | x  | x  | x  | x  | x  | x  | x                             | x                      | x                                                     |
| Hypoglycaemic episodes                            |                        | x             | x         | x  | x  | x  | x  | x  | x  | x  | x                             | x                      | x                                                     |
| ECG, overall interpretation <sup>4</sup>          |                        | x             |           |    |    |    |    |    |    |    | x                             |                        |                                                       |
| Fundoscopy/fundus photography                     |                        | x             |           |    |    |    |    |    |    |    |                               |                        |                                                       |
| Physical examination                              | x                      |               |           |    |    |    |    |    |    |    | x                             |                        |                                                       |
| Vital signs                                       | x                      | x             | x         | x  | x  | x  | x  | x  | x  | x  | x                             |                        |                                                       |
| Antibodies <sup>5</sup>                           |                        | x             |           |    |    |    |    | x  |    |    | x                             | x                      |                                                       |
| Biochemistry                                      |                        | x             |           |    |    |    |    | x  |    |    | x                             |                        |                                                       |
| Creatinine                                        | x                      |               |           |    |    |    |    | x  |    |    | x                             |                        |                                                       |
| Calcitonin                                        | x                      |               |           |    |    |    |    | x  |    |    | x                             |                        |                                                       |
| Haematology                                       |                        | x             |           |    |    |    |    | x  |    |    | x                             |                        |                                                       |
| PK sampling                                       |                        |               | x         | x  | x  | x  | x  | x  | x  | x  | x                             |                        |                                                       |
| PK sampling (trough + peak) <sup>6</sup>          |                        |               |           | x  |    |    |    | x  |    |    | x                             |                        |                                                       |
| Blood pregnancy test <sup>7</sup>                 | x                      | x             |           | x  |    | x  | x  | x  | x  | x  | x                             | x                      | x                                                     |
| Urinalysis                                        |                        | x             |           |    |    |    |    | x  |    |    | x                             |                        |                                                       |
| <b>TRIAL MATERIAL</b>                             |                        |               |           |    |    |    |    |    |    |    |                               |                        |                                                       |
| IV/IWRS call                                      | x                      | x             | x         | x  | x  | x  | x  | x  | x  | x  | x                             |                        |                                                       |
| Dispensing visit                                  |                        | x             | x         | x  | x  | x  | x  | x  | x  | x  |                               |                        |                                                       |
| Hand out directions for use of s.c. trial product |                        | x             | x         | x  | x  | x  | x  | x  | x  | x  |                               |                        |                                                       |
| Drug accountability                               |                        |               | x         | x  | x  | x  | x  | x  | x  | x  | x                             |                        |                                                       |
| <b>REMINDERS</b>                                  |                        |               |           |    |    |    |    |    |    |    |                               |                        |                                                       |

| Trial Periods                                          |       | Screening <sup>1</sup> | Randomisation | Treatment |    |    |    |    |    |    |    | End-of-treatment <sup>2</sup> | Follow-up <sup>2</sup> | End-of-trial – premature discontinuation <sup>3</sup> |
|--------------------------------------------------------|-------|------------------------|---------------|-----------|----|----|----|----|----|----|----|-------------------------------|------------------------|-------------------------------------------------------|
| Visit number                                           |       | 1                      | 2             | 3         | 4  | 5  | 6  | 7  | 8  | 9  | 10 | 11                            | 12                     | 11X                                                   |
| Timing of visit                                        | Weeks | -2                     | 0             | 2         | 4  | 6  | 8  | 12 | 16 | 20 | 24 | 26                            | 31                     | 26                                                    |
| Visit window                                           | Days  |                        |               | ±3        | ±3 | ±3 | ±3 | ±5 | ±5 | ±5 | ±3 | ±3                            | +5                     | ±3                                                    |
| SUBJECT RELATED INFO/ASSESSMENTS                       |       |                        |               |           |    |    |    |    |    |    |    |                               |                        |                                                       |
| Dispense glucose meter                                 |       | x                      |               |           |    |    |    |    |    |    |    |                               |                        |                                                       |
| Dispense subject identity card                         |       | x                      |               |           |    |    |    |    |    |    |    |                               |                        |                                                       |
| Dispense diary                                         |       | x                      | x             | x         | x  | x  | x  | x  | x  | x  | x  | x                             | x                      |                                                       |
| Collect and review diary                               |       |                        | x             | x         | x  | x  | x  | x  | x  | x  | x  | x                             | x                      |                                                       |
| Attend visit fasting <sup>8</sup>                      |       |                        | x             |           | x  |    | x  |    | x  |    |    | x                             | x                      |                                                       |
| Affirmation statement or Case book signed <sup>9</sup> |       |                        |               |           |    |    |    |    |    |    |    |                               | x                      | x                                                     |
| End of trial <sup>9</sup>                              |       |                        |               |           |    |    |    |    |    |    |    |                               | x                      | x                                                     |

Abbreviations in table: ECG = electrocardiogram, HbA<sub>1c</sub> = glycosylated haemoglobin, IV/WRS = interactive voice/web response system, PK = pharmacokinetics, PRO = patient reported outcome

## 2.1 Flow chart foot notes

| Footer         | Description                                                                                                                                                                                                                                                                                                                                                                                |
|----------------|--------------------------------------------------------------------------------------------------------------------------------------------------------------------------------------------------------------------------------------------------------------------------------------------------------------------------------------------------------------------------------------------|
| x <sup>1</sup> | Subject can be randomised as soon as all inclusion and exclusion criteria are confirmed. The screening assessments must not exceed 2 weeks prior to randomisation (Visit 2).                                                                                                                                                                                                               |
| x <sup>2</sup> | The End-of-treatment and Follow-up visits are applicable for all randomised subjects including subjects who have discontinued trial product prematurely.                                                                                                                                                                                                                                   |
| x <sup>3</sup> | Subjects discontinuing trial product prematurely will be asked to attend the End-of-treatment (V11) as soon as possible after treatment discontinuation and the Follow-up – premature discontinuation (V12) five weeks later (+5 days visit window). Furthermore, they are asked to attend the End-of-trial – premature discontinuation visit (V11X) (see Section <a href="#">8.1.9</a> ). |
| x <sup>4</sup> | An ECG performed for any reason unrelated to the trial within 30 days prior to the randomisation visit is acceptable as Visit 2 data, provided no clinical symptoms suggestive of cardiac disease has occurred in the meantime.                                                                                                                                                            |
| x <sup>5</sup> | At the randomisation visit, the antibody assessment must be done pre-dose.                                                                                                                                                                                                                                                                                                                 |
| x <sup>6</sup> | Trough and peak PK sampling is only applicable for subjects in the oral treatment arms and replaces the regular PK sampling at visits 4, 8 and 11. Subjects must attend the visit without having taken the tablet on the same day (see Section <a href="#">8.4.10</a> )                                                                                                                    |
| x <sup>7</sup> | For women of child bearing potential: Serum pregnancy tests must be performed.                                                                                                                                                                                                                                                                                                             |
| x <sup>8</sup> | Fasting for lab sampling is defined as having consumed only water since midnight. For the Follow-up visit (V12) attending fasting is defined as having consumed only water for at least the preceding 2 hours. For the trough and peak PK sampling visits (V4, 8, 11) the fasting is outlined in section <a href="#">5.3.1</a>                                                             |
| x <sup>9</sup> | Affirmation statement/case book signing and end of trial are at the Follow-up visit (V12). Only patients who have discontinued treatment prematurely are asked to attend the End-of-trial – premature discontinuation visit (V11X) which will then be end of trial.                                                                                                                        |



### **3 Background information and rationale for the trial**

The trial will be conducted in compliance with this protocol, ICH GCP<sup>1</sup> and applicable regulatory requirements, and in accordance with the Declaration of Helsinki<sup>2</sup>.

In this document, the term investigator refers to the individual responsible for the overall conduct of the clinical trial at a trial site.

#### **3.1 Type 2 diabetes mellitus and glucagon-like peptide-1**

Type 2 diabetes (T2D) is a major global health problem. The disease aetiology is multi-factorial and includes genetic predisposition in combination with sedentary life style factors such as physical inactivity and obesity.

T2D is a multi-organ disease characterised by defective insulin sensitivity in liver and skeletal muscle and a relative impairment of insulin secretion capacity. Furthermore, a blunted secretion and/or action of incretin hormones (glucagon-like peptide-1 (GLP-1) and gastric inhibitory polypeptide (GIP)) from the gastrointestinal (GI) tract (L-cells) in response to meals are also characteristics of T2D. GLP-1 is an important post-prandial hormone secreted from the L-cells in the intestine with a stimulating effect on insulin secretion and an inhibitory role on glucagon secretion from the endocrine pancreas in a glucose-dependent manner. In addition, GLP-1 restores beta-cell sensitivity to glucose. Animal studies suggest that GLP-1 also increases beta-cell mass. Extra-pancreatic effects include delaying of gastric emptying and effects on insulin sensitivity, although the latter is less clear. Pharmacological levels of GLP-1 reduce food intake and induce weight loss. As the majority (>80%) of T2D patients are overweight, the weight reduction properties of GLP-1 analogues are perceived to be advantageous compared to many other therapies for T2D. Due to the beneficial effects of GLP-1 on both glycaemic and weight control, treatment of T2D patients with GLP-1 analogues is considered favourable.

#### **3.2 Semaglutide and SNAC**

Semaglutide is a long-acting GLP-1 analogue that has achieved clinical proof of concept when administered subcutaneously (s.c.). Currently, semaglutide is in clinical development (NN9535) as a once-weekly s.c. injection for the treatment of T2D. The NN9535 project is in phase 3 development, encompassing six major safety and efficacy trials (see Section [3.2.3.2](#) for clinical data on s.c. semaglutide).

Oral administration inherently represents a different absorption route to reach systemic circulation compared to s.c. administration.

Native GLP-1 and GLP-1 analogues have in general very low oral bioavailability when administered in a formulation without absorption enhancement. Formulation with an absorption enhancing excipient is therefore needed to increase the oral bioavailability. However, exposure

exhibits a substantially greater dose-to-dose variation following oral administration compared to s.c. administration. An oral drug product with this chemical structure and properties will, because of the compound's PK properties (i.e., very low clearance and long terminal half-life), and by using once-daily administration, limit the variation in steady state plasma exposure. The initial side effects like nausea may therefore be low or absent following gradual dose escalation. Food interaction is expected to limit absorption, but a long-acting GLP-1 analogue product will allow dosing in the fasting state, without compromising the effective plasma profile. In addition, GLP-1 therapy generally does not induce hypoglycaemia on its own, which potentially could have been problematic given the large intra-patient plasma exposure variation.

Sodium N-[8-(2-hydroxybenzoyl) amino] caprylate / salcaprozate sodium (SNAC) has been studied in combination with acyclovir, peptide tyrosine tyrosine (PYY), cromolyn, ibandronate and heparin. Impact on metformin when co-administering SNAC and metformin was investigated as part of another trial involving healthy volunteers. The trial did not show any increase in metformin exposure when adding SNAC<sup>3</sup>. When co-formulated with SNAC, exposure of ibandronate (a nitrogen-containing bisphosphonate), is increased by 11- and 17-fold (AUC and C<sub>max</sub>, respectively). On the other hand, when co-administered with SNAC (in separate formulations) exposure was not affected compared to dosing ibandronate without SNAC, suggesting that the drug-drug interaction potential between SNAC and co-administered drugs with comparable physiochemical properties (compounds with permeability limited absorption) is low<sup>4</sup>.

The most extensive safety and PK data are available from the heparin formulated with SNAC programme including 32 phase 1 studies (daily SNAC doses ranged from 0.172 g – 10.5 g) of which three investigated SNAC alone. The studies covered formulation development, food effect, hepatic and renal impairment, age effect and drug-drug interactions. Three phase 2 and 3 studies have assessed effects of orally delivered heparin solution (>1.5 g SNAC three times daily). At present, no drugs containing SNAC have received regulatory approval.

### 3.2.1 Nonclinical data

The non-clinical programme for semaglutide was designed according to the International Conference on Harmonisation (ICH) M3 guideline to support the clinical development. The standard non-clinical data package required to support phase 3 clinical trials has been completed. In addition, 2-year carcinogenicity studies and a pre- and postnatal development toxicity study have been completed.

Semaglutide is generally well tolerated, with expected GLP-1 effects on food intake and body weight being the dose limiting effects, when dosed s.c. for up to two years in studies with rats and mice. No signs of overt toxicity, including safety concerns related to effects on the GI tract, were observed after oral administration of semaglutide for up to 26 weeks in rats and 17 weeks in cynomolgus monkeys. Two potential safety issues have been identified.

### **3.2.1.1 Thyroid C-cell tumours in rodents**

Treatment-related non-genotoxic proliferative changes in the thyroid C-cells of mice and rats were observed in 2-year carcinogenicity studies with semaglutide. Early C-cell changes were also identified in repeated dose toxicity studies with semaglutide in mice. However this was not the case in other species including a 52-week repeat dose study in non-human primates at exposure levels up to 36-fold above the expected clinical exposure. The observed pattern of effects in mice and rats (thyroid C-cell proliferation preceded by increase in serum calcitonin) and lack of these effects in the non-human primate and in man suggest that the mechanism by which semaglutide acts on the thyroid C-cells in rodents is the same as has been demonstrated for other GLP-1 receptor agonists, including liraglutide. The relevance for human subjects is unknown.

### **3.2.1.2 Teratogenicity in rats**

Semaglutide has been concluded teratogenic in rats, with exposure at no observable adverse effect level (NOAEL) below expected human exposure. This effect is regarded to be caused by impairment of nutrient supply to the embryo across the inverted yolk sac with placental function which is specific to rats. Non-human primates and humans do not depend on a yolk sac with placental function to supply nutrients to the embryo early in pregnancy. The effect on rat embryo-foetal development is therefore not likely to be relevant to humans. Preliminary and main embryo-foetal development (EFD) and pre- and postnatal development (PPND) studies with doses corresponding to 7-fold expected clinical exposure in cynomolgus monkeys have been finalised. In the main EFD study sporadic abnormalities were reported across all dose groups and in the PPND study a dose dependent increase in early pregnancy losses were observed. The findings observed across the three studies in cynomolgus monkeys are not indicative of teratogenic potential of semaglutide in this species. The increase in early pregnancy losses is indicative of embryo-toxicity, which may be related to the maternal effect of semaglutide (marked body weight loss). A developmental toxicity NOAEL was determined at an exposure 0.8-fold the expected clinical exposure (1 mg/week). A risk for the developing human embryo or foetus cannot be definitely ruled out, but the absence of findings indicative of teratogenicity in the EFD and PPND studies in cynomolgus monkey decrease the level of concern.

A comprehensive review of results from the non-clinical studies can be found in the IB for Semaglutide (subcutaneous administration), Edition 8<sup>5</sup> and the IB for Oral administration of semaglutide (NN9924), Edition 5<sup>6</sup>, or any updates of these documents

### **3.2.1.3 SNAC toxicology**

The nonclinical safety programme for SNAC includes safety pharmacology, metabolism and PK and toxicology and is in line with the ICH M3 guideline<sup>7</sup>. SNAC was developed as an absorption enhancing excipient for the oral route of administration.

SNAC is rapidly absorbed (time to maximal concentration ( $t_{max}$ ) within 1 hour) and eliminated ( $t_{1/2}$  = 1 and 3 hours across species). SNAC is metabolised mainly via stepwise beta-oxidation and de-acetylation of the side chain and the parent compound and its metabolites also undergo conjugation with glucuronic acid. The main elimination route for SNAC metabolites is via urinary excretion.

SNAC was generally well tolerated in animals at and below oral doses of 500 mg/kg/day (NOAEL) for up to nine (Rhesus monkey) and twelve (rat) months. Although no overt specific organ toxicity has been observed, SNAC was associated with treatment-related and unexplained mortality at dose levels only 1.5- to 3-fold above NOAEL in rat studies. A series of nonclinical studies to explore possible cause of death have been initiated. These studies include investigations to expand the standard package of nonclinical studies on CV and respiratory function, and systematic investigations of histological changes in the GI tract and liver after dosing of high concentration/high volumes of SNAC. To support the assessment of exposure margins between rats and humans, extensive PK and metabolism studies in rats are carried out. The quantification of SNAC metabolites will also be assessed in the on-going multiple dose (MD) clinical trial (NN9924-3991).

In an on-going two-year carcinogenicity study with rats, one unexplained death occurred at a dose of 200 mg/kg/day. Several cases of unexplained death were observed at 900 mg/kg/day in repeat dose toxicity studies of 26 weeks and 52-weeks duration. A NOAEL for SNAC has been determined to be 90 mg/kg/day (corresponding to ~4 to 6 times a human dose of 300 mg based on exposure (area under curve)). Histological changes (perivascular lymphoid aggregates) have been observed in the lungs at all SNAC dose levels in the 6-month rat study. SNAC appeared to exacerbate these lesions which may be indicative of an immunosuppressant effect.

### **3.2.2 Nonclinical pharmacology and pharmacokinetics**

The focus of the studies done in relation to oral administration of semaglutide in combination with SNAC has been on the following issues:

#### **Mechanism *in vitro***

SNAC increases absorption of drug compounds through the GI epithelium, which has been shown in humans (e.g., for endogenous GLP-1). *In vitro* studies have indicated that transport of compounds occurs mainly via the trans-cellular route and the effect is dependent on both the concentration of SNAC and the duration of incubation.

#### **Enhancement of absorption *in vivo***

SNAC enhances absorption of semaglutide from the stomach and small intestine in rats. There is considerable variability (coefficient of variation around 100%) with some animals showing no absorption. In the dog, there is higher bioavailability after oral dosing of tablets (1-2.5%) than after capsules (0.7%) or solution (0.07%). Semaglutide and SNAC have to be formulated in the same

tablet to get increased oral bioavailability of semaglutide, indicating that close interaction between the two molecules is necessary for enhancing the absorption. There is a strong reduction of bioavailability to practically zero when given concomitantly with food in dogs, and also an increasing amount of water dosed with the tablet seems to reduce oral bioavailability of semaglutide in this model, mimicking recent results in a human trial. Doses of SNAC of 150, 300 and 600 mg have been tested in dogs, and there was a tendency towards an optimum at 300 mg in terms of bioavailability. Furthermore, there is a tendency for non-linearity in bioavailability when increasing the amount of both SNAC and semaglutide in combination or semaglutide alone with constant SNAC content, whereas increasing amounts of SNAC alone (300 (one tablet) to 900 mg (three tablets)) with constant amount of semaglutide do not seem to significantly increase bioavailability.

### **Pharmacodynamics after oral administration**

Semaglutide dosed in combination with SNAC is able to induce the same type of PD effects on blood glucose, food intake and body weight as seen after s.c. administration of semaglutide and other marketed GLP-1 analogues. Thus, semaglutide in combination with SNAC lowered blood glucose and body weight in diabetic db/db mice, and reduced food intake and body weight in normal rats.

### **3.2.3 Clinical data**

#### **3.2.3.1 Data from literature**

Currently, no orally administered GLP-1 receptor agonist is available for the treatment of T2D.

There are, however, s.c. administered GLP-1 receptor agonists on the market and experience from their development has identified some potential safety issues for this class of compounds. Nonclinical thyroid C-cell tumours have been observed in rodents. Acute pancreatitis has been associated with chronic administration of GLP-1 receptor agonists in man. Elevated lipase has been observed in clinical studies but dose-response relationship and overall clinical significance is unclear. Hypoglycaemia, GI adverse events (i.e., nausea and vomiting), increased heart rate and renal dysfunction due to volume depletion following GI effects have also been observed.

#### **3.2.3.2 Clinical data of s.c. semaglutide**

As of 1 February 2013, 5 clinical pharmacology trials (NN9535- 1820, -3679, -3633, -3616 and -3819) and 1 phase 2 trial (NN9535-1821) have been completed using s.c. semaglutide. A total of 519 subjects have been exposed to s.c. semaglutide: 164 healthy subjects (both single and multiple dosing), 313 patients with T2D (up to 12 weeks of treatment) and 42 patients (4 subjects had T2D) with varying degrees of renal impairment (single dosing).

### ***Pharmacokinetics***

Results from 2 phase 1 trials (NN9535-3616 and 3819) show that s.c. semaglutide has pharmacokinetics (PK) properties compatible with once-weekly administration, with a median time to maximum concentration (t<sub>max</sub>) of 36 hours post dosing and an elimination half-life (t<sub>1/2</sub>) in the range of 165-184 hours (~7 days, harmonic mean). Overall, the PK properties of s.c. semaglutide appear similar in Caucasian and Japanese subjects, and also in healthy subjects and subjects with T2D. In a trial with subjects with different degrees of renal impairment (NN9535-3616), data suggested that severe renal impairment result in a slightly higher exposure compared to subjects with normal renal function (AUC<sub>0-∞</sub> increased by approximately 22%), whereas subjects with mild or moderate renal impairment and subjects on haemodialysis had exposure similar to subjects with normal renal function. No safety signals were identified in either of the renal groups, and tolerability profiles appeared similar across renal groups; thus, a dose-reduction in subjects with severe renal impairment does not appear to be warranted.

Interaction with oral contraceptives was assessed at semaglutide 1.0 mg steady-state exposures in postmenopausal women with T2D (NN9535-3819). Steady-state exposures (AUC<sub>0-24h</sub>) of ethinylestradiol (EE) and levonorgestrel (LN) were slightly increased (by 10% and 21%, respectively), with bioequivalence established for EE but not for LN; the increase was seen when oral contraceptives were co-administered with semaglutide compared to oral contraceptives alone.

Bioequivalence was demonstrated for C<sub>max</sub> of both EE and LN. These data indicate that semaglutide does not decrease the exposure of oral contraceptives, and suggest that no adjustments of oral contraceptive dose are warranted for women of childbearing potential using a low-dose oral contraceptive.

### ***Efficacy***

As of 1 February 2013, efficacy of s.c. semaglutide in the target population – subjects with T2D – has been investigated in one phase 2 dose range finding trial (NN9535-1821). The trial was a 12-week, randomised, double-blind, placebo- and active-controlled trial in which 411 adults with T2D received once-weekly s.c. injection of 1 of 5 semaglutide dose levels (0.1-1.6 mg) once-daily, open-label liraglutide (1.2 mg or 1.8 mg) or once-weekly placebo. 12 weeks of treatment, equivalent to 5-7 weeks in steady state on maintenance dose, provided statistically significant and clinically relevant improvement in glycaemic control for dose levels of 0.2 mg and above. Changes in HbA<sub>1c</sub> from baseline was up to -1.19 % (placebo adjusted estimated treatment difference). Dose-dependent improvements in fasting plasma glucose (FPG) and postprandial plasma glucose were also observed. The improvement in glycaemic control was accompanied by weight loss for semaglutide doses of 0.8 mg and above (placebo adjusted estimated treatment difference up to -3.64 kg).

### ***Safety***

From the clinical trials conducted so far the following safety observations have been made.

Consistent with findings with other GLP-1 receptor agonists, common adverse events (AEs) included nausea and vomiting; most of them were mild to moderate in intensity. Hypoglycaemia has occurred in subjects receiving semaglutide and these events have mainly been minor.

An increase in heart rate has been observed in subjects exposed to semaglutide in line with the increase seen with other GLP-1 analogues. The implications of this increase are unknown.

As is the case with all protein-based pharmaceuticals, subjects treated with s.c. semaglutide may develop immunogenic and allergic reactions. Few allergic reactions have been reported in connection with semaglutide. These have mainly been mild and transient. However, more generalised reactions may occur.

Injection site reactions have been infrequently reported. These have mainly been mild and transient in nature.

Please see appropriate IB<sup>5</sup> for further details.

### **3.2.3.3 Clinical data of oral GLP-1**

Clinical trials with increasing doses of oral semaglutide up to two tablets with 10 mg semaglutide and 300 mg SNAC have shown this to be safe and well tolerated. The oral semaglutide had acceptable bioavailability and a PK profile of two tablets with 10 mg semaglutide was similar to 0.5 mg s.c. semaglutide. Variability of the day-to-day PK profile was 3-4 times higher than compared to 0.5 mg s.c. once-weekly semaglutide but acceptable for further development.

The oral bioavailability of human GLP-1 has been demonstrated to increase several fold when formulated with SNAC with a  $t_{max}$  of approximately 15-30 min. In addition, even in healthy subjects a glucose-dependent insulinotropic action of GLP-1 upon oral delivery was shown.

Five phase 1 trials with oral semaglutide and SNAC have been completed:

- Single dose trial (NN9924-3691)
- Multiple dose trial 1 (NN9924-3692)
- Dosing condition trial (NN9924-3794)
- Pharmaco-scintigraphy trial (NN9924-3957)
- Multiple dose trial 2 (NN9924-3991)

For details on the individual trials, please see the current edition of the IB (Oral Administration of Semaglutide (NN9924)) Edition 5<sup>6</sup> and any updates hereof.

### **3.2.3.4 Clinical data of SNAC**

The largest safety data set exists from the programme of orally administered SNAC and heparin (all sponsored by Emisphere): 29 phase 1 trials (doses up to 10.5 g of SNAC), one phase 2 trial

(doses 1.5 g and 2.25 g of SNAC three times daily for 5 days) and two phase 3 trials (doses: 1.5 and 2.25 g of SNAC three times daily for 30 days) have been reported.

Oral SNAC exposure has most extensively been investigated in the phase 3 trial, named ERP-12. The objective of the trial was to investigate prevention of venous thrombotic complications following total hip replacement. Enrolled subjects were randomised in three treatments arms:

- Low dose SNAC (1.5 g) and heparin (60,000 USP units) thrice-daily for 30 days
- High dose SNAC (2.25 g) and heparin (90,000 USP units) thrice-daily for 30 days
- Enoxaparin sodium 30 mg s.c. twice-daily for 10 days

Total daily dose of oral SNAC was 4.5 g (low dose), 6.75 g (high dose) or 0 g (heparin s.c.). A total of 2,264 patients were enrolled with approximately 750 in each group.

The most frequently reported AEs were GI disorders with a dose relationship of SNAC and heparin, which also reflected the most common AEs reported for discontinuation. The SAEs were evenly distributed between the groups for all system organ classes other than GI disorders. Likewise, all deaths were evenly distributed between the groups and their nature and diversity did not indicate any causal relationship to trial drug. No other clinical significant safety issue was identified in the trial<sup>8</sup>.

For further details please see the current edition of the IB (Oral Administration of Semaglutide (NN9924)) Edition 5<sup>6</sup> and any updates hereof.

### **3.3 Risks and benefits of the trial**

There are s.c. administered GLP-1 receptor agonists on the market and experience from their development as well as experience from the s.c. semaglutide development programme have identified some potential safety issues for this class of compounds: 1) risk of teratogenicity, 2) risk of thyroid C-cell tumours, 3) risk associated to high doses of SNAC, 4) risk of carcinogenicity of SNAC, 5) risk of pancreatitis, 6) risk of antibody formation, 7) risk of allergic reactions, 8) risk of heart rate increase, 9) risk of severe risk of hypoglycaemia and 10) risk of altered renal function.

For further details please see the current edition of the IB (Oral Administration of Semaglutide (NN9924)) Edition 5<sup>6</sup> and any updates hereof.

In this trial, most subjects will receive a treatment anticipated to be more efficacious than the treatment they receive at the time of randomisation into the trial. It is expected that subjects will benefit from the trial treatment with respect to optimised glycaemic control, a reduced risk of long-term diabetic complications and a potential weight loss. The subjects in this trial will receive trial drug and auxiliary free of charge. Furthermore it is expected that all subjects participating in the trial will benefit from participation through close contact with the study site and close follow-up of



their T2D. Such careful medical examination will most likely result in an intensified management of their diabetes.

It is concluded that the potential benefits from participating in the trial outweigh the potential risks. The safety profile of semaglutide generated from the clinical and nonclinical development programme has not revealed any safety issues that would prohibit administration of once-daily doses of 2.5 to 40 mg semaglutide with 300 mg SNAC or once-weekly doses of 1.0 mg semaglutide in accordance with the planned clinical trial. The risk to the subjects in this trial is low and acceptable in view of the benefits an oral GLP-1 analogue would provide to subjects with T2D.

### **3.4 Rationale for the trial**

The trial will compare efficacy of oral semaglutide formulated with a fixed dose of 300 mg SNAC. To facilitate the generation of clinical data in subjects with T2D, the NN9924-3790 trial has been designed to investigate a dose range expected to cover relevant therapeutic levels, including systemic exposure equivalent to 0.5 and 1.0 mg of once-weekly s.c. semaglutide. Additional dose levels are examined to elucidate a wider dose-response spectrum below and above the expected therapeutic range. In addition, the trial will explore the safety and tolerability of three different dose escalation approaches (i.e., slow, standard and fast). Finally, the trial will compare parameters of efficacy, safety and tolerability and population PK after 26 weeks of treatment between the treatment arms.

Data from the NN9924-3790 trial combined with the results of other trials investigating semaglutide will support the decision to continue into phase 3 development.

## 4 Objective(s) and endpoint(s)

The objectives of the trial, addressed after 26 weeks of treatment, are as follows:

### 4.1 Objectives

#### 4.1.1 Primary objective

- To compare the efficacy on glycaemic control of oral semaglutide in a SNAC formulation against placebo in subjects with T2D

#### 4.1.2 Secondary objectives

- To compare the efficacy on glycaemic control of oral semaglutide in a SNAC formulation against s.c. semaglutide in subjects with T2D
- To compare the safety and tolerability of three dose escalation schemes using a single end dose level during 26 weeks administration of oral semaglutide and SNAC in a tablet formulation in subjects with T2D
- To compare parameters of efficacy, safety and tolerability, and population PK as reflected by endpoints below after 26 weeks of treatment

### 4.2 Endpoints

#### 4.2.1 Primary endpoint

- Change in HbA<sub>1c</sub> from baseline to after 26 weeks of treatment

#### 4.2.2 Supportive secondary endpoints

##### *Supportive secondary efficacy endpoints*

- Subjects who, after 26 weeks of treatment, achieve (yes/no) HbA<sub>1c</sub> <7% (53 mmol/mol)\*
- Change in fasting plasma glucose (FPG), C-peptide, fasting insulin and glucagon from baseline to after 26 weeks of treatment
- Change in insulin resistance (homeostatic model assessment index of insulin resistance (HOMA-IR)) and beta-cell function (homeostatic model assessment index of beta-cell function (HOMA-B)) from baseline to after 26 weeks of treatment
- Change in fasting lipid profile (total cholesterol, low density lipoprotein (LDL), high density lipoprotein (HDL), very low density lipoprotein (VLDL), triglycerides and free fatty acids) from baseline to after 26 weeks of treatment
- Change from baseline to week 26 in the patient reported outcome Medical Outcomes Study 36-Item Short-Form Health Survey (SF-36) (generic questionnaire)
- Change in body weight from baseline to after 26 weeks of treatment\*
- Change in waist circumference from baseline to after 26 weeks of treatment\*

- Change in body mass index (BMI) from baseline to after 26 weeks of treatment\*

***Supportive secondary safety endpoints***

- Number of treatment emergent adverse events (TEAEs) recorded from baseline until week 31\*
- Number of confirmed hypoglycaemic episodes recorded from baseline until week 31\*
- Change in vital signs (pulse, systolic- and diastolic blood pressure) from baseline to after 26 weeks of treatment
- Change in electrocardiogram (ECG) from baseline to after 26 weeks of treatment
- Change in physical examination from baseline to after 26 weeks of treatment
- Change in laboratory safety variables (haematology, biochemistry, hormone and urinalysis) from baseline to after 26 weeks of treatment
- Occurrence of antibodies against semaglutide during 26 weeks of treatment (positive/negative):
  - Anti-semaglutide antibodies
  - Anti-semaglutide antibodies with *in vitro* neutralising effect
  - Anti-semaglutide antibodies cross reacting with endogenous GLP-1
  - Cross reacting antibodies with *in vitro* neutralising effect to endogenous GLP-1
  - Antibody level during 26 weeks of treatment

***Supportive secondary pharmacokinetic endpoint***

- Semaglutide concentrations to be evaluated in a population PK analysis

\* Key supportive secondary endpoint prospectively selected for posting on [clinicaltrials.gov](http://clinicaltrials.gov)

## 5 Trial design

### 5.1 Type of trial

This is a randomised, partially-blinded, dose range, dose escalation, multicentre trial including nine treatment arms in total; seven oral semaglutide treatment arms, an oral placebo arm and an s.c. semaglutide arm with a parallel design (see [Figure 5–1](#)). All treatment arms include subjects with T2D who have failed on diet and exercise and/or metformin. The placebo tablets do not contain SNAC.

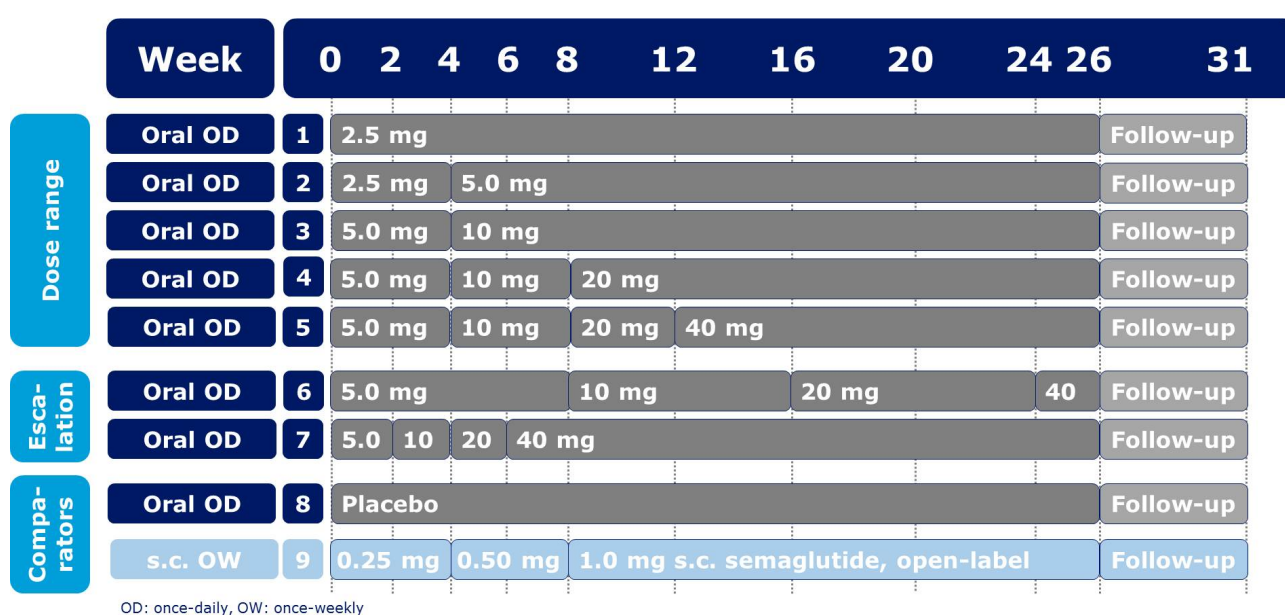

**Figure 5–1 Trial design of NN9924-3790**

Subjects with T2D will be randomised in an equal manner with 67 subjects planned to be randomised per treatment arm. Treatment arms 1-8 will include once-daily dosing of a tablet and will be blinded. Treatment arm 9 features open-label once-weekly s.c. injection. All arms include 26 weeks of treatment and a 5 week follow-up period. Oral dosing will be performed following specified fasting conditions (see [Figure 5–2](#)).

The nine treatment arms will include:

1. Semaglutide tablets once-daily: 2.5 mg for 26 weeks
2. Semaglutide tablets once-daily: 2.5 mg for 4 weeks, then 5.0 mg for 22 weeks
3. Semaglutide tablets once-daily: 5.0 mg for 4 weeks, then 10 mg for 22 weeks
4. Semaglutide tablets once-daily: 5.0 mg for 4 weeks, then 10 mg for 4 weeks, then 20 mg for 18 weeks

5. Semaglutide tablets once-daily: 5.0 mg for 4 weeks, then 10 mg for 4 weeks, then 20 mg for 4 weeks, then 40 mg for 14 weeks
6. Semaglutide tablets once-daily: 5.0 mg for 8 weeks, then 10 mg for 8 weeks, then 20 mg for 8 weeks, then 40 mg for 2 weeks
7. Semaglutide tablets once-daily: 5.0 mg for 2 weeks, then 10 mg for 2 weeks, then 20 mg for 2 weeks, then 40 mg for 20 weeks
8. Placebo tablets once-daily for 26 weeks
9. Semaglutide injections once-weekly: 0.25 mg for 4 weeks, then 0.50 mg for 4 weeks, then 1.0 mg for 18 weeks

For all groups the trial medication will be add-on to previous metformin therapy or as monotherapy in the case where the subject with T2D is treated with diet and exercise alone. At randomisation, subjects will be stratified according to one stratification value with two strata: Treatment with metformin at screening (yes/no).

## 5.2 Rationale for trial design

Parallel treatment groups and a randomised partially-blinded, controlled design have been chosen in accordance with the trial objectives. To avoid bias in the assessment of the different doses of oral semaglutide, the eight oral treatment arms are double-blind. The doses are escalated in standard four week intervals to limit gastrointestinal AEs. Escalation intervals of two weeks and eight weeks are also being explored to investigate effect on onset of action and overall AEs.

The use of s.c. semaglutide as active comparator was chosen to confirm that oral semaglutide in at least one of the selected doses reach the same levels of systemic exposure as for s.c. semaglutide. The active comparator is open-label to limit unnecessary injections (e.g., by use of double-dummy) as the objectives of the trial are to investigate the effects of the oral formulation.

## 5.3 Treatment of subjects

The subjects will attend a screening visit to determine their eligibility. If found eligible, the subjects will return for the first treatment visit where they will be randomised and receive treatment. The total duration of the trial will be 31 weeks for all subjects from randomisation to last visit. The highest dose for any trial subject will be 40 mg oral semaglutide once-daily or 1.0 mg s.c. semaglutide once-weekly.

Metformin is considered background medication (non-investigational medicinal product) and will not be provided by Novo Nordisk. Metformin should be used at the discretion of the investigator. Treatment with metformin extended/slow release formulations is allowed.

For the safety of the subjects, medications with a narrow therapeutic window may not be used in the trial (see the exclusion criteria, Section [6.3](#)).

Subjects will follow a fixed dose escalation regimen, which they have been randomised to, following the scheme in [Figure 5-1](#).

### 5.3.1 Dose levels and escalation regimen for oral dosing

Subjects on the oral dosing (treatment arms 1-8) must administer the dose following specific rules:

- Fasting for at least six hours (e.g., in the morning following an overnight fast) before tablet ingestion
- Water and oral concomitant medication is allowed two hours prior to dosing
- Intake of maximum 120 mL of water is allowed when swallowing the tablet
- Subjects are required to abstain from food and fluid intake for at least 30 minutes after ingestion of oral semaglutide or placebo
- Oral concomitant medication can be taken two hours post-dosing. If taken with food, concomitant medication can be administered 30 minutes after ingestion of the semaglutide or placebo tablet

See illustration of oral dosing and fasting rules in [Figure 5-2](#).



Figure 5-2 Dosing and fasting conditions for oral treatment (arms 1-8)

### 5.3.2 Dose levels and escalation regimen for s.c. dosing

Subjects randomised to the s.c. treatment arm will follow a fixed dose escalation for semaglutide. The maintenance dose of 1.0 mg will be reached after four doses (four weeks) of 0.25 mg, followed by four doses (four weeks) of 0.50 mg. The maintenance dose of 1.0 mg, once attained, may not be decreased for the duration of the study. Injections may be administered in the thigh, abdomen or upper arm, at any time of day irrespective of meals. The injections should be administered on the same day of the week during the trial.

#### **5.4 Treatment after end of trial**

The trial products will not be available to subjects after the end of trial.

When discontinuing trial products the subject should be switched to a suitable marketed product at the discretion of the investigator.

#### **5.5 Rationale for treatment**

The oral route of semaglutide administration investigated has been chosen to increase convenience and initiate earlier use of GLP-1 treatment of T2D patients, thus offering true GLP-1 benefits in a tablet format. The dose range of the oral treatment (2.5 mg, 5 mg, 10 mg, 20 mg and 40 mg) has been chosen based on phase 1 data and modelling derived from phase 1 trials with the aim to cover the same exposure as observed with s.c. semaglutide. The standard escalation scheme (i.e., dose escalation every four weeks to desired dose) has been chosen based on phase 1 data. The slow and fast dose escalation arms will investigate if AEs decrease or increase, respectively, compared to the standard dose escalation. The 26-week treatment period will provide additional data on safety and tolerability, investigate the variability at steady state exposure, test for efficacy and suggest which doses and escalation scheme to continue into pivotal development.

For further details please see the current edition of the IB (Oral Administration of Semaglutide (NN9924)) Edition 5<sup>6</sup> and any updates hereof.

## 6 Trial population

### 6.1 Number of subjects

|                                                    |       |
|----------------------------------------------------|-------|
| Number of subjects planned to be screened:         | 1,005 |
| Number of subjects planned to be randomised:       | 603   |
| Number of subjects expected to complete the trial: | 482   |

### 6.2 Inclusion criteria

For an eligible subject, all inclusion criteria must be answered “yes”.

1. Informed consent obtained before any trial-related activities. Trial-related activities are any procedures that are carried out as part of the trial, including activities to determine suitability for the trial
2. Male or female, age  $\geq 18$  years at the time of signing informed consent
3. BMI  $\geq 25$  and  $\leq 40$  kg/m<sup>2</sup>
4. Subjects diagnosed with T2D treated with diet and exercise and/or who have been on a stable dose of metformin for at least 30 days prior to screening
5. HbA<sub>1c</sub> 7.0-9.5% (53-80 mmol/mol) (both inclusive)

### 6.3 Exclusion criteria

For an eligible subject, all exclusion criteria must be answered “no”.

1. Known or suspected hypersensitivity to trial product(s) or related products
2. Previous participation in this trial. Participation is defined as informed consent
3. Female who is pregnant, breast-feeding or intends to become pregnant or is of child-bearing potential and not using an adequate contraceptive method (adequate contraceptive measures as required by local regulation or practice) for the duration of the trial and for three months following last dose

*Germany: Adequate contraceptive measures are implants, injectable, combined oral contraceptives, hormonal intrauterine device, sexual abstinence or vasectomised partner.*

*Sweden: Oral (except low-dose gestagen (lynestrenol and norethisteron)), injectable, or implanted hormonal contraceptives, intrauterine device, intrauterine system (for example, progestin-releasing coil), vasectomized male (with appropriate postvasectomy documentation of the absence of sperm in the ejaculate).*

*United Kingdom: Established use of oral, injected or implanted hormonal methods of contraception, intrauterine device or intrauterine system, barrier methods of contraception (condom or occlusive cap with spermicidal foam/gel/film/cream/suppository, male sterilisation or true abstinence when in line with the preferred and usual lifestyle of the subject.*

4. Participation in another clinical trial within 30 days before the screening visit
5. Any chronic disorder or severe disease which, in the opinion of the investigator, might jeopardise subject's safety, compliance with the protocol and/or ability to complete the study



6. Subjects on selected oral medication with a narrow therapeutic window, such as warfarin, digoxin, tricyclic antidepressants, lithium, aminophylline, theophylline and anticonvulsants
7. History of chronic pancreatitis or idiopathic acute pancreatitis
8. Screening calcitonin value  $\geq 50$  ng/L
9. Personal or family history of medullary thyroid carcinoma (MTC) or multiple endocrine neoplasia syndrome type 2 (MEN2)
10. Chronic malabsorption, regardless of aetiology
11. History of Crohn's disease, ulcerative colitis, or other inflammatory bowel disease
12. Previous gastrointestinal surgery such as invasive and corrective procedures involving the oesophagus, stomach, duodenum, gallbladder, pancreas or intestinal resections. Exempt are subjects that underwent uncomplicated surgical and diagnostic procedures such as appendectomy, hernia surgery, polypectomy, biopsies, as well as colonic- and gastric endoscopy
13. Surgery scheduled for the trial duration period (excluding minor surgical procedures performed in local anaesthesia, according to the opinion of the investigator)
14. Treatment with glucose lowering agent(s) other than metformin as stated in the inclusion criteria in a period of 90 days before the screening visit
15. Mental inability, unwillingness or language barrier precluding adequate understanding of or compliance with study procedures
16. Impaired renal function defined as estimated glomerular filtration rate (eGFR)  $< 60$  mL/min/1.73 m<sup>2</sup> per Modification of Diet in Renal Disease (MDRD) formula
17. Heart failure, New York Heart Association (NYHA) class IV
18. Within the past 6 months before the screening visit, any of the following: Episode of unstable angina, acute coronary event, cerebral stroke/transient ischemic attack or other significant cardiovascular event as judged by the investigator
19. Uncontrolled hypertension (defined as systolic blood pressure  $\geq 180$  mmHg or diastolic blood pressure  $\geq 100$  mmHg)
20. Known proliferative retinopathy or maculopathy requiring acute treatment according to the opinion of the investigator
21. Diagnosis of malignant neoplasm in the previous five years from the screening visit (except basal cell skin cancer or squamous cell skin cancer)

#### **6.4 Rescue criteria**

If any of the FPG values exceed the limits outlined below and no intercurrent cause of the hyperglycaemia can be identified the subject should be offered treatment intensification (rescue medication):

- 15.0 mmol/L (270 mg/dL) from randomisation to end of Week 5
- 13.3 mmol/L (240 mg/dL) from Week 6 to end of Week 11
- 11.1 mmol/L (200 mg/dL) from Week 12 to end of trial

A confirmatory FPG should be obtained by central laboratory if related to a scheduled visit or by local laboratory if not related to scheduled visits. If the confirmatory FPG exceeds the values described above the subject should be offered treatment intensification (rescue medication) at the discretion of the investigator and in accordance with ADA/European Association for the Study of Diabetes<sup>9</sup> (preferably excluding GLP-receptor agonists, DPP-4 inhibitors and amylin analogues). Rescue medication (intensification of existing background medication and/or initiation of new medication) and any changes to this should be captured on the concomitant medication form in the eCRF. Rescue medication should be prescribed as add-on to randomised treatment and subjects should continue to follow the protocol-specified visit schedule.

## **6.5 Withdrawal criteria and discontinuation of trial product**

### **6.5.1 Withdrawal from trial**

The subject may withdraw at will at any time. The subject may be withdrawn from the trial at the discretion of the investigator due to a safety concern. Please see Section [8.1.10](#) for procedure to be performed in case of subject withdrawal.

A subject must be withdrawn from the trial if the following applies:

1. Included in the trial in violation of the inclusion and/or exclusion criteria
2. Pregnancy
3. Intention of becoming pregnant

Subjects should stay in the trial irrespective of lack of adherence to randomised treatment, lack of adherence to visit schedule, missing assessments, trial product discontinuation due to AE (see Section [6.5.2](#)), unwillingness to cope with injection regimen, development of co-morbidities or clinical outcomes, hence this should not be considered as a valid reason for withdrawal from the trial.

Subjects considering withdrawing from the trial should be encouraged to have the procedures performed according to the End-of-treatment visit and the Follow-up visit, please see Section [8.1.8](#).

Subjects who are withdrawn will not be replaced.

### **6.5.2 Discontinuation of trial product**

The trial treatment must be discontinued if the subject meets one of the following criteria:

1. The investigator suspects acute pancreatitis. All drugs suspected to relate to this condition should be discontinued until confirmatory tests have been conducted and appropriate treatment should be initiated. Subjects who are diagnosed with acute pancreatitis must be discontinued from trial treatment. Diagnosis is based on at least 2 of the following 3 criteria:
  - a. characteristic abdominal pain

- b. amylase and/or lipase > 3x upper normal range, or
  - c. characteristic findings on ultrasound / computerised axial tomography (CT) / magnetic resonance imaging (MRI)
2. Calcitonin level  $\geq 50$  ng/L. The subject should be referred to a specialist in thyroid disease. All drugs suspected to relate to this condition should be discontinued
3. Other safety concerns as evaluated by the investigator

A treatment discontinuation session must be performed in the interactive voice/web response system (IV/WRS). The primary reason for discontinuation of the IMP must be specified in the electronic case report form (eCRF).

Subjects discontinuing the IMP should be called in for the End-of-treatment visit as soon as possible after discontinuation of the IMP and for the Follow-up visit five weeks later. Furthermore, the subjects should attend the End-of-trial – premature discontinuation visit (see Section [8.1.9](#)).

If the IMP is discontinued, the subject can be prescribed alternative therapy at the investigator's discretion.

## **6.6 Rationale for trial population**

This trial will include adult subjects with T2D and insufficient glycaemic control following treatment with diet/exercise or metformin. The T2D subjects will have an HbA<sub>1c</sub> of 7.0-9.5% and a BMI of 25-40 kg/m<sup>2</sup>. The trial will be carried out in Europe, North America and single countries in Africa, Asia and the Middle East as the first global, multicentre trial and will include both genders. This population is expected to mimic the target population in both a future phase 3 programme and once marketed.

## 7 Milestones

Planned duration of recruitment period (i.e., first subject first visit (FSFV) on 2 Dec 2013 – last subject first visit on 21 Apr 2014): 20 weeks

End of trial is defined as last subject last visit: 8 Dec 2014

### Recruitment

The clinical sites participating in the trial will recruit subjects according to a recruitment plan.

The screening and randomisation rate will be followed closely via the interactive voice/web response system (IV/WRS) in order to estimate when to stop screening. All investigators will be notified immediately when the recruitment period ends, after which no further subjects may be screened and the IV/WRS will be closed for further screening. All subjects included in the screening period and eligible for randomisation will be randomised.

### Trial registration

Information of the trial will be disclosed at [clinicaltrials.gov](http://clinicaltrials.gov) and [novonordisk-trials.com](http://novonordisk-trials.com). According to the Novo Nordisk Code of Conduct for Clinical Trial Disclosure, it will also be disclosed according to other requirements such as those of the International Committee of Medical Journal Editors (ICMJE)<sup>10</sup>, the Food and Drug Administration Amendment Act (FDAAA)<sup>11</sup>, European Commission Regulation for EudraCT<sup>12</sup> and other relevant recommendations or regulations. If a subject requests to be included in the trial via the Novo Nordisk e-mail contact at these web sites, Novo Nordisk may disclose the investigator's contact details to the subject. As a result of increasing requirements for transparency, some countries require public disclosure of investigator names and their affiliations.

## **8 Methods and assessments**

### **8.1 Visit procedures**

#### **8.1.1 Introduction**

Throughout the trial the investigator must ensure working in accordance with ICH GCP<sup>1</sup> and local regulations. The investigator must ensure that trial procedures are performed as described in the protocol. Any discrepancies will result in protocol and/or GCP deviations and the investigator must take appropriate actions to avoid recurrence of the detected discrepancies.

#### **8.1.2 Visit 1 (Screening)**

For procedures and assessments performed at screening, please see flow chart Section [2](#).

Investigators must obtain informed consent for each subject no later than at Visit 1 prior to any protocol-related procedures. For information on informed consent procedure please see Section [18.1](#).

All subjects will be provided with a copy of their own signed and dated informed consent form.

The IV/WRS must be contacted to register the subject as screened (see Section [10](#)) at the screening visit. Subject will be assigned a unique number (lowest available number allocated to site) which is maintained throughout the trial.

The investigator must keep a subject screening log, a subject identification code list and a subject enrolment log. The subject screening log and subject enrolment log may be combined in one list and may be generated from IV/WRS.

At screening, subjects will be provided with a card stating that they are participating in a trial and giving contact address(es) and telephone number(s) of relevant trial site staff. Subjects should be instructed to return the card to the investigator at the last trial visit or to destroy the card after the last visit.

For screening failures the screening failure form must be completed with the reason for not continuing in the trial. Serious and non-serious adverse events from screening failures must be transcribed by the investigator into the electronic case report form (eCRF). Follow-up of serious adverse events (SAEs) must be carried out according to Section [12.3](#). A screening failure session must be made in the IV/WRS. The case book must be signed.

Re-screening of subjects having signed the informed consent is not allowed.

Once all data relating to Visit 1 have been obtained, these must be reviewed by the investigator to ensure that the subject is eligible to continue the trial.

### **8.1.3 Fasting visits**

The subjects should attend several visits in a fasting state (see Section [2](#)). Fasting is defined as having consumed only water since midnight. An exception from this is the Follow-up visit where fasting is defined as having consumed only water for the last two hours.

Subjects are allowed to take the IMP and oral concomitant medication during fasting if following the conditions outlined in Section [5.3](#). An exception is at three visits in the oral treatment arms where peak and trough PK will be measured and the oral IMP will be administered at the site (see Section [8.4.10](#)).

If a subject attends a fasting visit in a non-fasting condition or a peak and trough PK meeting having taken the oral dose the same day, then blood sampling and body weight must be re-scheduled within the visit window. The date for each fasting assessment or PK assessment at the specific visit must be updated accordingly in the eCRF. All other assessments can be performed. Re-scheduling of fasting visits or peak and trough PK visits are not considered unscheduled visits.

### **8.1.4 Unscheduled visits**

An unscheduled visit can be scheduled at any time at the discretion of the investigator. An unscheduled visit form must be completed in the eCRF indicating the reason for the visit. Coming to the site for any of the following reasons should not be considered as unscheduled visits:

- dispense additional trial products
- dispense additional auxiliary supplies
- re-test of blood- or urine sampling (not allowed if results are available)

In case of additional trial products being dispensed, a dispensing session should be made in the IV/WRS selecting additional medication.

### **8.1.5 Visit 2 (Randomisation)**

For procedures and assessments performed at randomisation, see Section [2](#).

Visit 2 will take place within two weeks after Visit 1.

The randomisation session must be performed in the IV/WRS which will allocate the Dispensing Unit Number (DUN) of the IMP to be dispensed to the subject. Eligible subjects will be randomised into one of nine treatment arms.

The IMP will be dispensed to the subject by the trial site staff, hospital pharmacy staff or equivalent at each visit during the trial from randomisation to last visit before the End-of-treatment visit (see Section 2). The investigator must document that subjects are instructed in oral IMP administration at every dispensing visit.

For subjects randomised to the s.c. injection, the investigator must document that a direction for use (DFU) is handed out at each dispensing visit. Ability and willingness to self-inject can be tested by administration of injections with a test pen for subjects who do not have prior experience with self-injection. Novo Nordisk will provide the test pens.

Please see Section 9 for further information about the IMPs.

#### **8.1.6 Visit numbers**

For visit numbers, timing of site visits and visit windows during the trial period, please refer to the flow chart, Section 2. Planned visits can be re-scheduled within the allowed visit window.

It is the responsibility of the investigator to ensure that all site visits occur according to the flow chart (see Section 2).

#### **8.1.7 Visits 3-10 (Treatment)**

For procedures and assessments performed at visits 3, 4, 5, 6, 7, 8, 9, and 10, see the flow chart in Section 2.

#### **8.1.8 Visits 11-12 (End-of-treatment and Follow-up)**

All subjects must attend the End-of-treatment visit (Visit 11) which should be scheduled when the subject has completed the treatment with the IMP and a Follow-up visit (Visit 12) should be performed at least 5 weeks after (+5 days visit window). A completion session must be performed in the IV/WRS. Please see the flow chart for details (Section 2).

The Follow-up visit serves to collect AEs, technical complaints, hyperglycaemic episodes and blood samples for anti-semaglutide antibodies.

#### **8.1.9 Visit 11X (End-of-Trial – premature discontinuation)**

For subjects who discontinue the IMP prematurely the End-of-treatment visit (Visit 11) should be scheduled shortly after the subject has discontinued the IMP. The Follow-Up visit (Visit 12) should be scheduled at least 5 weeks (+5 days visit window) after treatment discontinuation. Treatment discontinuation and drug accountability sessions must be done in the IV/WRS. Please see the flow chart for details (Section 2).

Subjects who discontinue their IMP prematurely must also be requested to attend the visit End-of-trial – premature discontinuation (Visit 11X) at the time of the scheduled end of treatment (i.e., 26 weeks after randomisation). Data on AEs and the primary endpoint from this final visit are important for the data quality of the trial.

### **8.1.10 Withdrawals**

If a subject is withdrawn from the trial, the investigator must aim to undertake procedures similar to those for visit 11 (End-of-treatment) as soon as possible, and the Follow-up visit at least 5 weeks after. The end-of-trial form must be completed and the subject should return all trial products to the site to have final drug accountability performed. Drug accountability must be performed even if the subject is not able to come to the trial site. A treatment discontinuation session must be performed in the IV/WRS (see Section [10](#)). The case book must be signed.

Although a subject is not obliged to give his/her reason(s) for withdrawing from a trial, the investigator must make a reasonable effort to ascertain the reason(s), while fully respecting the subject's rights. Where the reasons are obtained, the primary reason for discontinuation must be specified on the end-of-trial form in the eCRF (see Section [6.5.1](#)):

### **8.1.11 Investigator's assessment**

Review of diaries, laboratory reports, ECGs, eye examination (fundoscopy/fundus photography), physical examination and patient reported outcome (PRO) questionnaires must be documented with the investigator's or delegated site staff's dated signature either on the front page of the documents or in the subject's medical record. The documents should be signed prior to the following visit and must be retained at the investigator site as source documentation.

For ECGs and eye examinations the evaluations must be in the following categories:

- Normal
- Abnormal
  - Was the finding clinically significant? (yes/no)

For laboratory report values outside the reference range, the investigator must specify whether the value is non-clinically or clinically significant. All laboratory printouts must be signed and dated by the investigator on the day of evaluation.

In case of abnormal clinically significant findings (e.g., in laboratory reports, ECGs, eye examination or physical examination), the investigator must state a comment in the subject's medical record and record this on the concomitant illness form in the eCRF at the screening or randomisation visits. At subsequent visits any clinically significant changes or new clinically significant findings must be reported as an AE according to Section [12.2](#).



If clarification of entries or discrepancies in the diary or PROs is needed, the subject must be questioned and a conclusion made in the subject's medical record. Care must be taken not to bias the subject.

## 8.2 Subject related information

### 8.2.1 Concomitant illness and medical history

A **concomitant illness** is any illness that is present at the start of the trial (i.e., at the screening visit or found as a result of screening procedure). The concomitant illness should be recorded in the eCRF.

**Medical history** is a medical event that the subject has experienced in the past. Only medical history considered relevant by the investigator should be reported.

The information collected for concomitant illness and medical history should include diagnosis, date of onset and date of resolution or continuation, as applicable.

Any change to a concomitant illness should be recorded during the trial. A clinically significant worsening of a concomitant illness must be reported as an AE.

**Smoking habit:** Details of smoking habit must be recorded at the first visit. Smoking is defined as smoking at least one cigarette, cigar or pipe daily. The collected information should include whether or not the subject smokes or has smoked. If the subject smokes or has smoked, record approximately when the subject started smoking and, if applicable, when the subject stopped smoking.

**Diabetes complications** should be captured in the medical history or concomitant illness form and should include:

- diabetic retinopathy
- diabetic neuropathy
- diabetic nephropathy
- macroangiopathy including peripheral vascular disease
- other complications where relevant

### 8.2.2 Concomitant medication

A **concomitant medication** is any medication, other than the trial products, which is taken during the trial, including the screening and follow-up periods.

Details of any concomitant medication must be recorded at the first visit. Changes in concomitant medication must be recorded at each visit as they occur.

The information collected for each concomitant medication includes:

- trade name or generic name
- indication
- start and stop date or continuation
- total daily dose (only applicable for antidiabetic medication)

If a change is due to an AE, then this must be recorded and reported according to Section [12.2](#). If the change influences the subject's eligibility to continue in the trial, the monitor must be informed.

### **8.2.3 Demography**

Demography will be recorded in the eCRF at screening and consists of:

- date of birth or age (according to local regulation)
- sex
- race (according to local regulation)
- ethnicity (according to local regulation)

### **8.2.4 Diagnosis of diabetes**

The date of diagnosis of T2D will be recorded in the eCRF at screening.

### **8.2.5 Diabetes treatment history**

The dose and the date of initiating treatment with metformin will be recorded in the eCRF at screening if the subject is currently treated with metformin.

### **8.2.6 History of gallbladder disease**

Information related to history of gallbladder disease (i.e., pancreatitis, gallstone disease, cholecystitis) will be recorded in the eCRF at screening visit.

### **8.2.7 History of cardiovascular disease**

Information related to history of cardiovascular disease (CVD) (i.e., heart failure including NYHA class, hypertension or ischaemic stroke) or other risk factors for CVD will be recorded in the eCRF at screening visit.

### **8.2.8 Renal impairment history**

Information related to history of renal impairment will be recorded in the eCRF at screening visit.

## 8.2.9 Post-dose fasting routines

The fasting routines following oral trial product administration should be recorded in the subject's diary handed out at Visit 10 and transcribed to the eCRF by the investigator at the End-of-treatment visit to determine the usual fasting time after tablet ingestion during the trial.

The post-dose fasting routines are recorded as time in minutes from IMP administration until the usual time of:

- food consumption (i.e., meal or snack)
- drinking (i.e., any beverage including water)

## 8.3 Assessments for efficacy

### 8.3.1 Blood samples

Blood samples will be drawn according to flow chart (see Section [2](#)) and analysed at the central laboratory to determine levels of the following efficacy laboratory parameters:

Glucose metabolism:

- HbA<sub>1c</sub>
- Fasting plasma glucose (FPG)
- Fasting insulin
- Fasting C-peptide
- Fasting glucagon

Lipids (all fasting):

- Total cholesterol
- LDL-cholesterol
- VLDL-cholesterol
- HDL-cholesterol
- Triglycerides
- Free fatty acids

### 8.3.2 Body measurements

#### Body weight

Body weight should be measured without shoes and only wearing light clothing. It should be recorded with one decimal and using the same set of scales throughout the trial (i.e., kg or lb)

#### Height

Height is measured without shoes in centimetres or inches and recorded to nearest ½ cm or ¼ inch.

## Waist circumference

The waist circumference is defined as the minimal abdominal circumferences located midway between the lower rib margin and the iliac crest.

Three consecutive measurements of waist circumference should be performed and recorded in the eCRF. The waist circumferences will be measured using a non-stretchable measuring tape. It should be recorded to the nearest ½ cm or ¼ inch using the same measuring tape throughout the trial.

The subject should be measured in a standing position with an empty bladder and wearing light clothing with accessible waist. The subject should be standing with arms down their side and feet together. The tape should touch the skin but not compress soft tissue and twists in the tape should be avoided. The subject should be asked to breathe normally and the measurement should be taken when the subject is breathing out gently.

## BMI

BMI will be captured in the eCRF using the equation:

$$\text{BMI} = \text{Body weight (kg)} / (\text{Height (m)} \times \text{Height (m)}) \quad [\text{kg/m}^2 = \text{lb/in}^2 \times 703]$$

### 8.3.3 Patient reported outcomes

The PRO questionnaire used in this trial is SF-36v2™.

The questionnaire should be completed by the subject as specified in the flow chart, see Section [2](#), preferably before any other trial-related activities. It takes approximately ten minutes to complete the questionnaire.

The questionnaire is checked by the investigator for completion and unreported AEs (see Section [8.1.11](#)). The investigator or site staff must date and sign the document and enter the results in the eCRF.

The SF-36v2™ questionnaire will be used to assess subjects overall Health related Quality of Life and can also be used to estimate Quality-Adjusted Life Year which is used in cost effectiveness calculations. This instrument contains 36 items and measures the individual overall health related quality of life on eight domains: physical functioning, role functioning, bodily pain, general health, vitality, social functioning, role emotional and mental health.

## 8.4 Assessments for safety

### 8.4.1 Hypoglycaemic episodes

Plasma glucose should always be measured and recorded when a hypoglycaemic episode is suspected.

All plasma glucose values:

- $\leq 3.9$  mmol/L (70 mg/dL) or
- $> 3.9$  mmol/L (70 mg/dL) when they occur in conjunction with hypoglycaemic symptoms,

should be recorded by the subject in the diary. These must be transcribed into the eCRF (hypoglycaemic episode form) throughout the trial from Visit 1-12.

The record should include the following information:

- Date and time of hypoglycaemic episode
- The plasma glucose level before treating the episode (if available)
- Whether the episode was symptomatic
- Whether the subject was able to treat him/herself
- Date and time of last trial product administration prior to episode
- Type of last trial product prior to episode
- Date and time of last main meal prior to episode
- Whether the episode occurred in relation to increased physical activity

The answer to the question: “Was subject able to treat him/herself?” must be answered “No” if oral carbohydrates, glucagon or IV glucose had to be administered to the subject by another person. Oral carbohydrates should not be given if the subject is unconscious.

A hypoglycaemic episode form must be filled in for each hypoglycaemic episode. If the hypoglycaemic episode fulfils the criteria for an SAE then an AE form and an electronic safety information form (eSIF) must also be filled in (see Section [12.2](#))

For all FPG values measured by central laboratory that meet the definition of a hypoglycaemic episode, a hypoglycaemic episode form must be completed in the eCRF.

### 8.4.2 Blood samples

Blood samples will be drawn according to flow chart (see Section [2](#)) and will be analysed at the central laboratory to determine levels of the following safety laboratory parameters:

Haematology:

- Differential count (basophils, eosinophils, lymphocytes, monocytes and neutrophils)

- Erythrocytes
- Haematocrit
- Haemoglobin
- Leucocytes
- Thrombocytes

Biochemistry:

- Alanine aminotransferase
- Albumin
- Alkaline phosphatase
- Amylase
- Aspartate aminotransferase
- Bilirubin, total
- Calcium, total
- Calcium, albumin corrected (ionized)
- Creatine kinase
- Creatinine
- Lipase
- Potassium
- Sodium
- Urea

Hormone:

- Calcitonin (see Section [8.4.11](#))

Pregnancy test:

- Serum or plasma human chorionic gonadotropin (hCG)

### 8.4.3 Pregnancy test

Females of childbearing potential will have a serum pregnancy test (i.e., beta-hCG) performed as specified in Section [2](#) or as required by local law.

Pregnancy testing will not be required (unless required by local law) for subjects who are post-menopausal (defined as women who have undergone a hysterectomy, bilateral oophorectomy or bilateral tubal ligation or for women above the age of 50, who have been without menstrual period for at least 1 year).

#### **8.4.4 Urinalysis**

Subjects will be asked to bring first morning urine during the trial (see Section 2). The urine samples will be analysed at the central laboratory to determine levels of the following safety laboratory parameters:

- Urinary albumin to creatinine ratio
- Urinalysis by urine dip-stick: erythrocytes, protein, glucose and ketones, pH

#### **8.4.5 Antibodies**

Blood samples will be drawn during the trial and analysed at specialised laboratory for determination of serum antibodies to semaglutide, including cross reactivity to endogenous GLP-1 (see flow chart, section 2). Samples positive for antibodies against semaglutide will be further characterised for *in vitro* neutralising effect towards semaglutide. In addition, samples positive for antibodies cross-reacting with endogenous GLP-1 will be analysed for *in vitro* neutralising effect towards endogenous GLP-1. Furthermore, samples drawn at randomisation may be used for calculations of the neutralising effect in the *in vitro* neutralising antibody assays. The *in vitro* neutralising assays will be performed by Novo Nordisk.

At randomisation, the antibody assessment must be done pre-dose.

#### **8.4.6 Vital signs**

The method for measuring systolic and diastolic blood pressure needs to follow the standard clinical practice at site but as a minimum; the following guideline must be adhered to: Avoid caffeine, smoking and exercise at least 30 minutes prior to measuring the blood pressure. The blood pressure should be measured in a sitting position, with the legs uncrossed, the back and arms supported and positioned at heart level. Subjects should be sitting for at least five minutes before the first measurement is taken. The subject should not talk during the measurement. Pulse (beats per minute) should be measured after resting for five minutes in a sitting position. Results are recorded in the eCRF.

In case of an “abnormal, clinically significant finding”, the investigator must record the finding on the medical history or concomitant illness form if present at screening.

Any new abnormal, clinically significant finding during the trial and any clinically significant worsening from baseline must be reported as an AE.

#### **8.4.7 Electrocardiogram – 12-lead**

12-lead ECG will be performed during the trial (see Section 2). All ECGs will undergo central assessment.

Sites will be informed of the central ECG evaluation in case this evaluation reveals an abnormal, clinically significant ECG reading. If the abnormality represents an unreported AE, SAE or MESI, such findings must be reported if the investigator finds the abnormality clinically significant (see Section [8.1.11](#)).

Additional ECG recordings can be performed at the investigators site at the investigator's discretion at other visits than the planned ECG visits. All such ECGs will undergo central assessment.

An ECG performed for any reason unrelated to the trial within 30 days prior to the randomisation visit is acceptable as Visit 2 data, provided no clinical symptoms suggestive of cardiac disease has occurred in the meantime.

If the ECG is performed before the subject has signed the informed consent form, it must be documented in the medical records that the reason for performing the procedure was not related to this trial.

For electronic central ECG evaluation vendor details, see Attachment I.

#### **8.4.8 Fundoscopy/fundus photography**

Fundoscopy/fundus photography will be performed at randomisation by the investigator or according to local practice. Results of the fundoscopy/fundus photography will be reviewed, signed and dated by the investigator (see Section [8.1.11](#)). Dilation is not a requirement.

If fundoscopy/fundus photography has been performed within 90 days before the screening visit, the procedure does not need to be repeated unless worsening of visual function since the last examination. A subject cannot be randomised without results confirming there is not retinopathy or maculopathy requiring acute treatment.

If the fundoscopy/fundus photography is performed before the subject has signed the informed consent form, it must be documented in the medical records that the reason for performing the procedure was not related to this trial.

#### **8.4.9 Physical examination**

A physical examination will be performed by the investigator according to local procedures, see Section [2](#)).



A physical examination must include:

- General appearance
- Central and peripheral nervous system
- Head, ears, eyes, nose, throat, neck
- Thyroid gland
- Respiratory system
- Cardiovascular system
- Gastrointestinal system including mouth
- Musculoskeletal system
- Skin
- Lymph node palpation

The results are recorded as described in Section [8.1.11](#).

#### **8.4.10 Pharmacokinetics**

Blood samples for the population PK will be drawn from all subjects for bioanalysis of the plasma concentrations of semaglutide at Visits 3-11 (see flow chart, Section [2](#)). The investigator must record the exact time for drawing the blood samples in the laboratory requisition form and transcribe the data to the eCRF.

For subjects on oral treatment, three of the PK sampling assessments will be pre-dose and post-dose (trough and peak) only (see Section [2](#)). At the visits for trough and peak PK measurements, the investigator needs to ensure that the subjects on oral treatment follow these procedures:

- Attend the visit fasting
- Have the IMP administered at the visit (i.e., subjects must not self-administrate the tablet on the day of the visit)
- Ingest tablet at site
- Eat a meal 30-60 minutes after IMP administration
- Have an extra blood sample drawn 60-90 minutes after IMP administration

The exact time points of trial drug administration, start of meal and blood sampling must be recorded in the eCRF by the investigator.

For the oral treatments, the date and time of the latest trial drug administration must be recorded by the subject in the subject diary and transcribed to the eCRF by the investigator.

For the s.c. semaglutide arm, the date, time, dose and injection site of the two latest trial drug administrations must be transcribed to the eCRF by the investigator based on the subject's diary.

#### **8.4.11 Calcitonin**

Blood samples for the measurement of calcitonin concentration will be drawn as per flow chart (see Section [2](#)). Calcitonin values  $\geq 20$  ng/L will be submitted to an independent committee of thyroid experts. The Calcitonin Monitoring Committee (CMC) will provide guidance to the investigator with regards to treatment and further investigations. It is recommended that screening failure subjects with a calcitonin value  $\geq 10$  ng/L are referred to a thyroid expert for further evaluation. For details please refer to Appendix A.

#### **8.5 Laboratory assessments**

The laboratory analyses will mainly be performed by a central laboratory. For analyses of anti-semaglutide antibodies (see Section [8.4.5](#)) and semaglutide plasma concentrations (see Section [8.4.10](#)) a special laboratory will be used. Also, in the situation described in Section [8.6.2.1](#) a special laboratory will be used. Laboratory samples comprise both urine and blood samples. Descriptions of assay methods, laboratory supplies and procedures for collecting, handling, storing and shipping samples and information regarding who will perform the assessments will be described in the laboratory manual provided by the central laboratory (for central and special laboratory details, see Attachment I).

Samples will be coded in order to keep subject identity anonymous.

Laboratory samples not collected on the day of the actual visit should preferably be collected on another day within the visit window as stated in the flow chart (see Section [2](#)). Please note that a laboratory sample pertaining to a specific visit must always be reported to that visit.

For some of the samples collected during the trial, subjects must attend the relevant site visits fasting (fasting is defined in Section [8.1.3](#)).

At three visits (see Section [2](#)), the subjects on oral treatment must attend the relevant site without having taken the trial product the same day to have PK measured pre-dose and post-dose (trough and peak), see Section [8.4.10](#).

The central laboratory will provide laboratory results to the investigator on an on-going basis and the investigator must review all laboratory results for concomitant illnesses and AEs and report these according to Section [12.2](#).

An exception to this is that anti-semaglutide antibody and semaglutide plasma concentration results will not be available to the investigator during the trial. These results will be provided to the investigator upon request after the completion of the clinical trial report (CTR).

All laboratory samples will be destroyed at the latest at the completion of the CTR, except samples obtained for anti-semaglutide antibody analysis which may be kept up to ten years or stored until

approval by health authorities. Antibody samples will only be analysed if requested by the health authorities or for safety.

The laboratory equipment may provide analyses not requested in the protocol but produced automatically in connection with the requested analyses according to specifications in the laboratory standard operating procedures. Such data will not be transferred to the trial database, but abnormal values must be reported to the investigator. The investigator must review all laboratory results for concomitant illnesses and AEs and report these according to this protocol.

## 8.6 Other assessments

### 8.6.1 Subject diary

The subject must be provided with diaries at all visits until the End-of-treatment visit. Entries in the diary are only to be made by the subject.

The investigator/delegate should instruct the subject in recording the following data in the diary:

- For all subjects:
  - date and time of first IMP administration
  - hypoglycaemic episodes
  - concomitant medication
  - AEs
- For subjects treated with oral semaglutide:
  - date and time of last IMP administration prior to each visit
  - post-dose fasting routines during the trial and recorded at the End-of-treatment visit
- For subjects treated with s.c. semaglutide:
  - date, time, dose and injection site of the last two IMP administrations before each visit

The diaries should be collected at the following visit. The recordings must be reviewed as described in Section [8.1.11](#).

### 8.6.2 Additional safety assessments

#### 8.6.2.1 Thyroidectomy, tissue sample and genetic testing

##### Thyroidectomy pathology slides

In case a subject undergoes a thyroidectomy (partial or total) for any reason during the trial the subject will be asked to inform the investigator prior to the operation.

In addition to the review of the thyroid tissue routinely made by the hospital pathology laboratory, the pathology slides of the thyroid tissue will be sent centrally for a second review by a pathologist with expertise in thyroid and C-cell pathology. The central pathologist will be blinded to both

randomised treatment and the diagnosis from the hospital pathology laboratory. Both the hospital pathology report and the central pathology report will be reviewed by an independent Event Adjudication Committee (EAC) (see Section [12.7.2](#)). Once the samples are re-examined they will be sent back to the hospital pathology laboratory.

The investigator will be informed of the results of central pathology report and if C-cell pathology is confirmed by the EAC, the CMC will provide guidance to the investigator with regards to treatment and further investigations.

#### **Thyroid tissue sample collection in case of thyroidectomy (not applicable for Israel)**

If C-cell pathology is confirmed (i.e., hyperplastic or neoplastic thyroid C-cells) the subject will be asked to consent to have a sample of the removed thyroid tissue tested for RET Y1062 phosphorylation in the thyroid C-cells, if allowed by local law. The tissue sample will be destroyed after examination.

#### **Blood sample for genetic testing in case of confirmed C-cell pathology (not applicable for Israel)**

In addition, the subject will also be asked to consent to be tested (blood sample) to identify germline RET gene mutations associated with MEN2 syndrome. This RET gene mutation detection will only be conducted if the EAC has confirmed C-cell abnormality (medullary carcinoma or C-cell hyperplasia). The genetic testing will only be performed if allowed by local law.

The blood sample should be collected at the first visit to the clinic after the confirmation of C-cell pathology. The extraction of DNA will be performed by the central laboratory whereas the identification of gene mutations will be performed by a specialised laboratory. The blood sample will be destroyed as soon as the genetic analysis is complete.

#### **8.6.2.2 Assessments in case of suspicion of acute pancreatitis**

In case of acute, severe persistent abdominal pain characteristic of acute pancreatitis, the IMP must promptly be interrupted until pancreatitis is excluded (see Section [6.5.2](#)). Appropriate additional examinations should be performed according to local practice. If acute pancreatitis is not confirmed trial product should be re-initiated.

If pancreatitis is confirmed (as a minimum 2 of 3):

- characteristic abdominal pain
- blood amylase and/or lipase >3x upper normal range (UNR)
- characteristic findings on ultrasound/CT/MRI

appropriate treatment and careful monitoring of the subject should be initiated. Trial product should not be re-initiated but subject should remain in the trial. The event should be reported as a MESI and will undergo assessment by the EAC (see Section [12.7.2](#)).

### **8.6.2.3 Assessments in case of suspicion of severe hypersensitivity**

If a severe immediate hypersensitivity reaction to the IMP is suspected, blood sampling for assessment of anti-semaglutide IgE antibodies and anti-semaglutide binding antibodies should be collected after a suitable washout period (minimum 5 weeks). In these cases, it is also recommended to test for tryptase (total and/or mature tryptase) within three hours of the reaction.

Furthermore, a tryptase sample should be taken at the same time as the IgE sample is obtained. Tryptase concentrations (if measured) as well as results of anti-semaglutide antibody and IgE-isotype anti-semaglutide antibodies should be sent to Novo Nordisk.

## **8.7 Subject compliance**

Subject compliance will be assessed by monitoring of drug accountability. Prior to visits where drug accountability is performed the subject will be asked to return all used, partly used and unused IMPs. The investigator must assess the amount of IMPs returned compared to what was dispensed at the last dispensing visit and, in case of discrepancies, question the subject.

Throughout the trial the investigator will remind the subjects to follow the trial procedures and requirements to ensure subject compliance. If a subject is found to be non-compliant, the investigator will remind the subject of the importance of following the instructions given including taking the trial products as prescribed.

## 9 Trial supplies

Trial supplies comprise trial products and auxiliary supplies. Additional details regarding trial supplies can be found in the Trial Materials Manual (TMM).

Trial products must not be dispensed to any person not included in the trial.

For injectable products, the trial product must not be used if:

- it does not appear clear and colourless
- it has been frozen
- it has been exposed to excessive heat or direct sunlight

### 9.1 Trial products

The following trial products will be provided by Novo Nordisk A/S, Denmark:

**Table 9–1 Trial products (IMP)**

| Active substance | Strength   | Dosage form                                                      |
|------------------|------------|------------------------------------------------------------------|
| Semaglutide      | 2.5 mg     | tablet                                                           |
| Semaglutide      | 5.0 mg     | tablet                                                           |
| Semaglutide      | 10 mg      | tablet                                                           |
| Semaglutide      | 20 mg      | tablet                                                           |
| Semaglutide      | 40 mg      | tablet                                                           |
| Placebo          | N/A        | tablet                                                           |
| Semaglutide      | 1.34 mg/mL | solution for injection,<br>1.5 mL pre-filled PDS290 pen-injector |

N/A: not applicable

The IMPs for oral use will be packed in 15 mL Duma containers (lid with desiccant). Each container will include ten tablets. Subjects in the oral treatment arms will be instructed in how to ingest the tablets following the condition rules. All tablets containing semaglutide or placebo are identical with regards to visual appearance, taste and smell.

The semaglutide, solution for injection will be delivered open-label with the pre-filled PDS290 pen-injector. The direction for use of the pen-injector will be given to each subject in the s.c. treatment arm at each dispensing visit.

For further details, please see the current edition of the IB (Oral Administration of Semaglutide (NN9924) Edition 5<sup>6</sup> and any updates hereof.

Metformin may be used at the discretion of the investigator. Metformin will not be supplied by Novo Nordisk. However, metformin will be reimbursed if required by the country's Health Authority or independent ethics committee/Institutional Review Board (IEC/IRB).

## 9.2 Labelling

Labelling of the trial products will be in accordance with Annex 13<sup>13</sup>, local regulations and trial requirements.

Each investigator site will be supplied with sufficient trial products for the trial on an on-going basis controlled by the IV/WRS. Dispensing unit numbers (DUNs) will be distributed to the sites according to enrolment and randomisation.

The investigator or delegate must document that direction for use of the device is handed out at each dispensing visit. This could be by signature in the subject's medical record.

## 9.3 Storage

Tablets containing the SNAC enhancer are susceptible to degradation in humid environment. It is important to protect the tablets by following the storage conditions in [Table 9–2](#). Before opening the Duma container for the first time, the container must acclimatise for 1 hour at room temperature due to risk of condensation.

**Table 9–2 Storage conditions for trial products**

| Trial product                                          | Storage conditions (not-in-use)                                                                                                                                                  | In-use conditions                                                                                                                                                                                                                            | In-use time*        |
|--------------------------------------------------------|----------------------------------------------------------------------------------------------------------------------------------------------------------------------------------|----------------------------------------------------------------------------------------------------------------------------------------------------------------------------------------------------------------------------------------------|---------------------|
| Semaglutide and placebo tablets                        | <ul style="list-style-type: none"> <li>Must be stored in a refrigerator (2°C to 8°C) / (36°F to 46°F)</li> <li>Do not freeze</li> <li>Protect from light and humidity</li> </ul> | <ul style="list-style-type: none"> <li>Store below 30°C / 86°F</li> <li>Do not refrigerate</li> <li>Do not freeze</li> <li>Protect from light and humidity</li> <li>Container must be stored with lid tightly closed at all times</li> </ul> | Use within 4 weeks  |
| Semaglutide, solution for injection                    | <ul style="list-style-type: none"> <li>Must be stored in a refrigerator (2°C to 8°C) / (36°F to 46°F)</li> <li>Do not freeze</li> <li>Protect from light</li> </ul>              | <ul style="list-style-type: none"> <li>Store below 30°C / 86°F</li> <li>Do not refrigerate</li> <li>Do not freeze</li> <li>Protect from light</li> </ul>                                                                                     | Use within 1 month  |
| Semaglutide placebo, solution for injection (test pen) | <ul style="list-style-type: none"> <li>Must be stored in a refrigerator (2°C to 8°C) / (36°F to 46°F)</li> <li>Do not freeze</li> <li>Protect from light</li> </ul>              | <ul style="list-style-type: none"> <li>For single use only</li> </ul>                                                                                                                                                                        | For single use only |

\* In-use time starts when first dose is taken.

The investigator must ensure the availability of proper storage conditions, record and evaluate the temperature. The investigator must inform Novo Nordisk immediately if any trial product has been stored outside defined conditions (e.g., outside temperature range).

Trial products that have been stored improperly must not be dispensed to any subject before it has been re-evaluated and approved for further use by Novo Nordisk. The investigator must take appropriate action to ensure correct storage.

#### **9.4 Drug accountability and destruction**

Drug accountability is the responsibility of the investigator.

Returned trial product (used/partly used or unused including empty packaging material) can be stored at room temperature and must be stored separately from non-allocated trial product.

The trial products will be dispensed to each subject as required according to treatment group. The IV/WRS will allocate trial product to the subject at each dispensing visit. The correct dispensing unit number(s) (DUN(s)) must be dispensed to the subject.

The investigator or delegated person is responsible for ensuring that:

- Trial products are not dispensed to any person not included in the trial
- Drug accountability is performed using the IV/WRS drug accountability module
- Subjects are instructed to return all used, partly used and unused trial product including empty packaging material at every visit
- Returned trial product(s) (used, partially used or unused including empty packaging material) is kept and stored separately from non-allocated trial products

Destruction will be done according to local procedures after accountability is finalised and verified by the monitor. Destruction of products must be documented.

#### **9.5 Auxiliary supplies**

Auxiliary supplies provided by Novo Nordisk:

- Blood glucose meters, including lancets, plasma-calibrated test strips and control solutions.
- Direction for use for devices (only subjects on s.c. semaglutide)
- Needles for pre-filled pen systems (only subjects on s.c. semaglutide)
- Test pens containing semaglutide placebo (only subjects on s.c. semaglutide)

Test pens containing semaglutide placebo, solution for injection, 1.5 mL pre-filled PDS290 pen-injector will be supplied at the randomisation visit to subjects randomised to injection treatment. Training with the test pen is optional and recommended for subjects without prior injection experience to ensure the subject's willingness and ability to self-inject. The test pen should be administered once and the training be performed at the clinical site. The subjects must not take the test pens home.

Details of the auxiliary supplies are provided in the TMM.



## 10 Interactive voice/web response system

A trial-specific IV/WRS will be set up which can be accessed at any time via the internet or telephone. Access to the IV/WRS must be restricted to and controlled by authorised persons.

IV/WRS is used for:

- Screening
- Screening failure
- Randomisation
- Medication arrival
- Dispensing
- Treatment discontinuation
- Completion
- Code break
- Drug accountability
- Data change

IV/WRS user manuals will be provided to each trial site.

During the trial, only DUNs allocated by the IV/WRS are allowed to be dispensed to a subject. This will ensure that:

- needed stock is available at a site for the subjects
- no allocation of IMP that will expire before the next dispensing contact
- drug accountability can be made in IV/WRS

If a subject needs IMP between dispensing visits, the investigator must make an additional dispensing session in the IV/WRS.

## 11 Randomisation procedure and breaking of blinded codes

The trial is partially blinded. The oral semaglutide arms and the oral placebo arm are double-blind whereas the s.c. semaglutide active comparator arm is open-label.

The randomisation is stratified according to one stratification factor with two strata: Treatment with metformin at screening (yes/no).

### 11.1 Breaking of blinded codes

If the trial site needs to break the code, Novo Nordisk should, if possible, be contacted before the code is broken. The IV/WRS will notify Novo Nordisk (monitor and the Global Safety department) immediately after the code is broken.

The code for a particular subject may be broken in a medical emergency if knowing the actual treatment would influence the treatment of the subject. Whenever a code is broken the person breaking the code must print the Code Break Confirmation Notification generated by the IV/WRS, record the reason and sign and date the document.

When the code is broken, the treatment allocation will be accessible to the investigator and the Novo Nordisk Global Safety department. If IV/WRS is not accessible at the time of code break the monitor should be contacted and if monitor cannot get access the IV/WRS vendor helpdesk should be contacted. Contact details are listed in Attachment I.

If the code has been broken, the subject should be discontinued from trial product but be asked to continue in the trial (see Section [8.1.9](#)).

If the subject is withdrawn after the code has been broken, a treatment discontinuation session should be completed in IV/WRS.

## 12 Adverse events, technical complaints and pregnancies

### 12.1 Definitions

#### Adverse event

An **adverse event** is any untoward medical occurrence in a subject administered a product, and which does not necessarily have a causal relationship with this treatment.

An AE can therefore be any unfavourable and unintended sign (including an abnormal laboratory finding), symptom or disease temporally associated with the use of a product, whether or not considered related to the product.

An AE includes:

- A clinically significant worsening of a concomitant illness.
- A clinical laboratory adverse event (CLAE): a clinical laboratory abnormality which is clinically significant, i.e. an abnormality that suggests a disease and/or organ toxicity and is of a severity that requires active management. Active management includes active treatment or further investigations, for example change of medicine dose or more frequent follow-up due to the abnormality.

The following should **not** be reported as AEs:

- Pre-existing conditions, including those found as a result of screening procedures (pre-existing conditions should be reported as medical history or concomitant illness).
- Pre-planned procedures unless the condition for which the procedure was planned has worsened from the first trial-related activity after the subject has signed the informed consent.
- Non-serious hypoglycaemia is an AE, but is reported on a hypoglycaemic episode form instead of on an AE form (see Section [8.4.1](#))

The following definitions are used when assessing an AE:

- **Severity assessment:**
  - **Mild** – no or transient symptoms, no interference with the subject's daily activities, acceptable
  - **Moderate** – marked symptoms, moderate interference with the subject's daily activities, but still acceptable
  - **Severe** – considerable interference with the subject's daily activities; unacceptable
- **Causality assessment**

The following terms and definitions are used when assessing the relationship between an AE and the relevant trial product(s):

  - **Probable** – Good reason and sufficient documentation to assume a causal relationship

- **Possible** – A causal relationship is conceivable and cannot be dismissed
- **Unlikely** – The event is most likely related to aetiology other than the trial product
- **Final outcome of an AE**
  - **Recovered/resolved** – The subject has fully recovered, or by medical or surgical treatment the condition has returned to the level observed at the first trial-related activity after the subject signed the informed consent.
  - **Recovering/resolving** – This term is only applicable if the subject has completed the trial or has died from another AE. The condition is improving and the subject is expected to recover from the event.
  - **Recovered/resolved with sequelae** – The subject has recovered/resolved from the condition, but with lasting effect due to a disease, injury, treatment or procedure. If a sequela meets an SAE criterion, the AE must be reported as an SAE.
  - **Not recovered/not resolved** – The condition of the subject has not improved and the symptoms are unchanged, or the outcome is not known at the time of reporting.
  - **Fatal** – This term is only applicable if the subject died from a condition related to the reported AE. Outcomes of other reported AEs in a subject before he/she died should be assessed as “recovered/resolved”, “recovering/resolving”, “recovered/resolved with sequelae” or “not recovered/not resolved”. An AE with fatal outcome must be reported as an SAE.
  - **Unknown** – This term is only applicable if the subject is lost to follow-up.

### **Serious adverse event**

A **serious adverse event** is an experience that at any dose results in any of the following:

- Death
- A life-threatening<sup>a</sup> experience
- In-patient hospitalisation<sup>b</sup> or prolongation of existing hospitalisation
- A persistent or significant disability or incapacity<sup>c</sup>
- A congenital anomaly or birth defect
- Important medical events that may not result in death, be life threatening<sup>a</sup> or require hospitalisation<sup>b</sup> may be considered an SAE when – based on appropriate medical judgement – they may jeopardise the subject and may require medical or surgical intervention to prevent one of the outcomes listed in this definition of SAE<sup>d</sup>. Suspicion of transmission of infectious agents via trial product must always be considered an SAE

<sup>a</sup> The term “life threatening” in the definition of SAE refers to an event in which the subject was at risk of death at the time of the event. It does not refer to an event which hypothetically might have caused death if it was severe.

<sup>b</sup> The term “hospitalisation” is used when a subject:

- Is admitted to a hospital or in-patient, irrespective of the duration of physical stay, or
- Stays at the hospital for treatment or observation for more than 24 hours

Medical judgement must always be exercised, and when in doubt, the hospital contact should be regarded as a hospitalisation. Hospitalisations for administrative, trial-related and social purposes do not constitute AEs and should therefore not be reported as AEs or SAEs. Hospital admissions for surgical procedures, planned before trial inclusion, are not considered AEs or SAEs.

<sup>c</sup> A substantial disruption of a subject’s ability to conduct normal life functions (e.g., following the event or clinical investigation the subject has significant, persistent or permanent change, impairment, damage or disruption in his/her body function or structure, physical activity and/or quality of life).

<sup>d</sup> For example intensive treatment in an emergency room or at home of allergic bronchospasm, blood dyscrasias or convulsions that do not result in hospitalisation, or development of drug dependency or drug abuse.

### **Non-serious adverse event**

A non-serious AE is any AE which does not fulfil the definition of an SAE.

### **Medical event of special interest**

A medical event of special interest (MESI) is an event which, in the evaluation of safety, has a special focus. A MESI is an AE (SAE or non-serious AE) which fulfils one or more of the below defined MESI criteria.

1. Fatal Events (All events with fatal outcome) (A)
2. Acute Coronary Syndrome (Myocardial Infarction, Hospitalization for Unstable Angina) (A)
3. Cerebrovascular Events (Stroke, Transient Ischemic Attack) (A)
4. Coronary Revascularization Procedure (A)
5. Heart Failure requiring Hospital Admission (A)
6. Pancreatitis or clinical suspicion of pancreatitis (A)
7. Neoplasms (A)
8. Thyroid Disease ((A) if thyroid neoplasm or resulting in thyroidectomy)
9. Medication errors concerning trial products:
  - Administration of wrong drug
  - Wrong route of administration
  - Administration of a high dose with the intention to cause harm (e.g., suicide attempt)
  - Administration of a lower or higher dose than intended (e.g., taking more than the planned number of tablets); however, the administered dose must deviate from the intended dose to

an extent where clinical consequences for the trial subject were likely to happen as judged by the investigator, although not necessarily did happen

MESIs marked with an ‘(A)’ in the list above will undergo adjudication by an independent EAC (see Section [12.7.2](#)).

Any event confirmed or suspected to be a MESI must be reported. In case the sponsor identifies potentially missed MESIs through predefined review of available data, the investigator will be asked to reconsider if this is a MESI. However, MESIs should not be reported for screening failures.

For further information regarding definitions of MESIs and an overview of which events that should undergo adjudication, please refer to Appendix C.

When reporting a MESI the following forms must be completed: AE form, eSIF, specific MESI follow-up questions (MESI form) and if applicable, the Event Adjudication Document Collection Form (only events for adjudication) in the eCRF.

### **Technical complaint**

A technical complaint is any written, electronic, or oral communication that alleges product (medicine or device) defects. The technical complaint may be associated with an AE, but does not concern the AE itself.

Examples of technical complaints:

- The physical or chemical appearance of trial products (e.g., discoloration, particles or contamination)
- The packaging material (e.g., leakage, cracks, rubber membrane issues or errors in labelling text)
- Problems related to devices (e.g., to the injection mechanism, dose setting mechanism, glucose measurement, push button or interface between the pen and the needle)

### **12.2 Reporting of adverse events**

All events meeting the definition of an AE must be collected and reported. This includes events from when the subject has signed the informed consent until the end of the post-treatment follow-up period. The events must be recorded in the applicable eCRF forms in a timely manner (see timelines below and [Figure 12-1](#)).

During each contact with the trial site staff, the subject must be asked about AEs and technical complaints, for example by asking: “Have you experienced any problems since the last contact?”

All AEs, either observed by the investigator or reported by the subject, must be reported by the investigator and evaluated. Novo Nordisk assessment of expectedness is performed according to the following reference document: IB (Oral Administration of Semaglutide (NN9924)) section 6.2.6.1 Reference safety information, Edition 5<sup>6</sup> and any updates hereof.

All AEs must be recorded by the investigator on an AE form. The investigator should report the diagnosis, if available. If no diagnosis is available, the investigator should record each sign and symptom as individual AEs using separate AE forms.

For SAEs, an eSIF must be completed in addition to the AE form. If several symptoms or diagnoses occur as part of the same clinical picture, one safety information form can be used to describe all the SAEs.

MESIs, regardless of seriousness, must be reported using both the AE form, the safety information form and a MESI form. The MESI form is an electronic form tailored to collect specific information related to the individual MESIs. For MESIs qualifying for event adjudication, an Event Adjudication Document Collection Form will also have to be completed in the eCRF. The Event Adjudication Document Collection Form is a check list of clinical data to be provided from the site.

The AE form for a non-serious AE should be signed when the event is resolved or at the end of the trial.

#### **Timelines for initial reporting of AEs:**

The investigator must complete the following forms in the CRF/eCRF within the specified timelines:

- **SAEs:** The AE form **within 24 hours** and the safety information form **within 5 calendar days** of the investigator's first knowledge of the SAE

Both forms must be signed within 7 calendar days from the date the information was entered in the eCRF.

- **SAEs fulfilling the MESI criteria:** In addition to above, the MESI form **within 14 calendar days** of the investigator's first knowledge of the AE
- **Non-serious AE fulfilling the MESI criteria:** The AE form, and safety information form and MESI form **within 14 calendar days** of the investigator's first knowledge of the event.

If a MESI fulfils the Event Adjudication criteria the investigator must complete the Event Adjudication Document Collection Form within 14 calendar days of the investigator's first knowledge of the adverse event.

If the eCRF is unavailable, the concerned AE information must be reported on paper forms and sent to Novo Nordisk by fax, e-mail or courier within the same timelines as stated above. When the eCRF becomes available again, the investigator must re-enter the information on the appropriate forms in the eCRF.

Contact details (fax, telephone, e-mail and address) are provided in the investigator’s trial file.

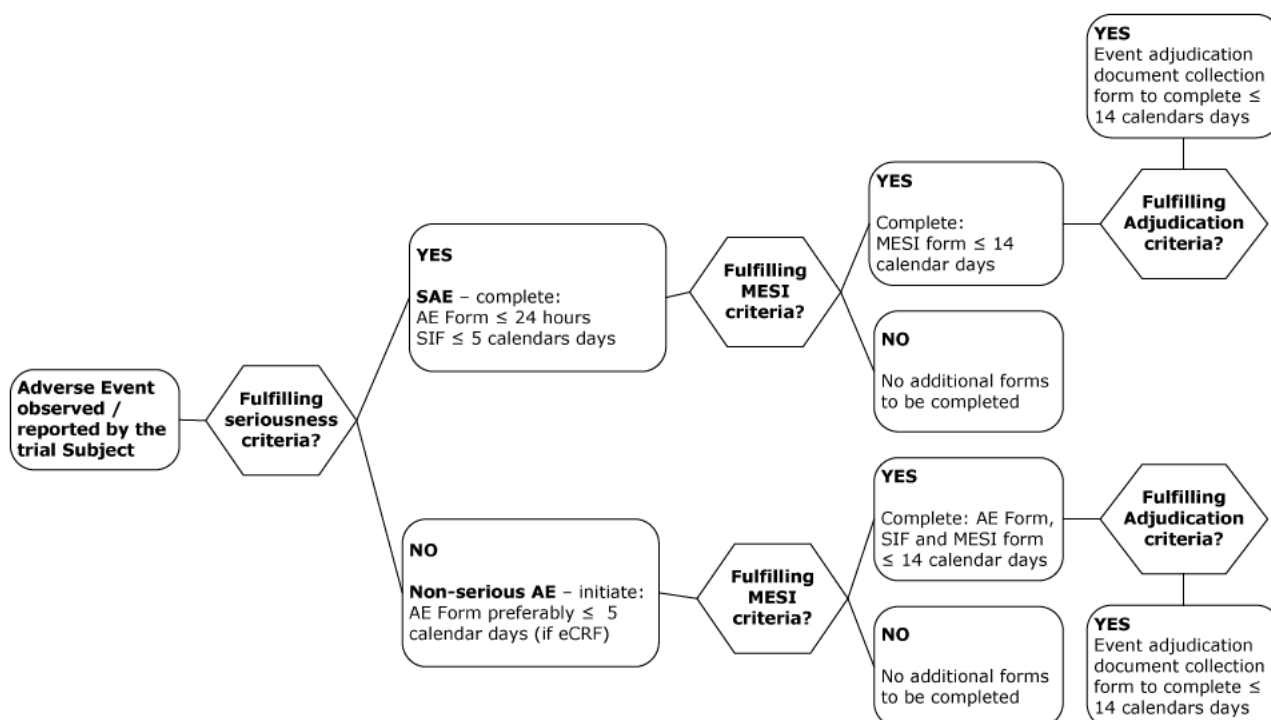

**Figure 12–1 Initial reporting of AEs**

**Reporting of trial product-related SUSARs by the sponsor:**

Novo Nordisk will notify the investigator of trial product-related suspected unexpected serious adverse reactions (SUSARs) in accordance with local requirements and GCP<sup>1</sup>. In addition, the investigator will be informed of any trial-related SAEs that may warrant a change to any trial procedure.

In accordance with regulatory requirements, Novo Nordisk will inform the regulatory authorities, including EMA, of trial product-related SUSARs. In addition, Novo Nordisk will inform the IRBs/IECs of trial product-related SUSARs in accordance with local requirement and GCP<sup>1</sup>, unless locally this is an obligation of the investigator.



### 12.3 Follow-up of adverse events

During and following a subject's participation in the trial, the investigator should ensure that adequate medical care is provided to the subject for any AE, including significant laboratory values related to the trial. The investigator should inform the subject when medical care is needed for AE(s) of which the investigator becomes aware.

The investigator must record follow-up information by updating the forms in the eCRF.

Follow up information must be reported to Novo Nordisk according to the following:

- **SAEs:** All SAEs must be followed up until the outcome of the event is "recovered/resolved", "recovered/resolved with sequelae" or "fatal", and until all queries have been resolved. Cases of chronic conditions, cancer or AEs ongoing at time of death (where death is due to another AE) may be closed with the outcome "recovering/resolving" or "not recovered/not resolved". Cases can be closed with the outcome of "recovering/resolving" when the subject has completed the follow-up period and is expected by the investigator to recover.

The SAE follow-up information should only include new (e.g., corrections or additional) information and must be reported **within 24 hours** of the investigator's first knowledge of the information. This is also the case for previously non-serious AEs which subsequently become SAEs. The applicable forms must be signed within 7 calendar days from the date the new information was entered in the eCRF.

- **Non-serious AEs:** Non-serious AEs must be followed until the outcome of the event is "recovering/resolving", "recovered/resolved" or "recovered(resolved with sequelae" or until the end of the follow-up period stated in the protocol, whichever comes first, and until all queries related to these AEs have been resolved. Cases of chronic conditions, cancer or AEs ongoing at time of death (where death is due to another AE) may be closed with the outcome "recovering/resolving" or "not recovered/not resolved". Cases can be closed with the outcome of "recovering/resolving" when the subject has completed the follow-up period and is expected by the investigator to recover.
- **Non-serious AE fulfilling the MESI criteria:** Follow-up information on MESIs should only include new (e.g., corrections or additional) information and must be reported **within 14 calendar days** of the investigator's first knowledge of the information. This is also the case for previously non-serious AEs which subsequently fulfil the MESI criteria.

The investigator must record follow-up information on non-serious AEs by updating the AE form in the eCRF.

The investigator must ensure that the worst case severity and seriousness of an event is kept throughout the trial. A worsening of an unresolved AE must be reported as follow up with re-assessment of severity and/or seriousness of the event.

Queries or follow-up requests from Novo Nordisk must be responded to **within 14 calendar days** from the date of receipt of the request, unless otherwise specified in the follow-up request.

## **12.4 Technical complaints and technical complaint samples**

### **12.4.1 Reporting of technical complaints**

All technical complaints on any of the following products:

- Semaglutide tablets
- Placebo tablets
- Semaglutide for s.c. injection, solution for injection, 1.5 mL pre-filled PDS290 pen injector
- Semaglutide placebo for s.c. injection, solution for injection, 1.5 mL pre-filled PDS290 pen-injector (test pen)
- Novo Nordisk needles

which occur from the time of first usage of the product until the time of the last usage of the product, must be collected and reported to Customer Complaint Center, Novo Nordisk.

Contact details (fax, e-mail and address) are provided in the investigator's trial file.

The investigator must assess whether the technical complaint is related to any AEs, SAEs and/or MESI.

Technical complaints must be reported on a separate technical complaint form for each product listed. If the technical complaint involves more than one code number, lot number or DUN, a technical complaint form for each code number, lot number or DUN must be completed.

The investigator must complete the technical complaint form in the eCRF within the following timelines of the trial site obtaining knowledge of the technical complaint:

- Technical complaint assessed as related to an SAE **within 24 hours**
- All other technical complaints **within 5 calendar days**

If the eCRF is unavailable or when reporting a technical complaint that is not subject related, the information must be provided on a paper form by fax, e-mail or courier to Customer Complaint Center, Novo Nordisk, within the same timelines as stated above.

#### **12.4.2 Collection, storage and shipment of technical complaint samples**

The investigator must collect the technical complaint sample and notify the monitor **within 5 calendar days** of obtaining the sample at trial site. The monitor must coordinate the shipment to Customer Complaint Center, Novo Nordisk (the address is provided in the investigator's trial file) and ensure that the sample is sent as soon as possible. A print of the technical complaint form must be sent with the sample.

The investigator must ensure that the technical complaint sample contains the code number and, if available, the DUN.

If the technical complaint sample is unobtainable, the investigator must specify on the technical complaint form why it is unobtainable.

Storage of the technical complaint sample must be done in accordance with the conditions prescribed for the product. The shipment of the technical complaint sample should be done in accordance with the same conditions as for storage (see Section 9).

#### **12.5 Pregnancies**

Female subjects must be instructed to notify the investigator immediately if they become pregnant during the trial. The investigator must report any pregnancy in subjects who have received trial product(s).

The investigator must follow the pregnancy until the pregnancy outcome and the newborn infant is one month of age.

The investigator must report information about the pregnancy, pregnancy outcome, and health of the newborn infant(s), as well as AEs in connection with the pregnancy, and AEs in the foetus and newborn infant.

The following must be collected and reported by the investigator to Novo Nordisk – electronically (e.g., in PDF format), or by fax or courier:

##### **1. Reporting of pregnancy information**

Information about the pregnancy and pregnancy outcome/health of the newborn infant(s) has to be reported on Maternal Form 1A and 1B, respectively.

When the pregnancy outcome is abnormal (i.e., congenital anomalies, foetal death including spontaneous abortion and/or any anomalies of the foetus observed at gross examination or during autopsy), and/or when a congenital anomaly is diagnosed within the first month, further information has to be reported for the female subject on Maternal Form 2. In addition, information from the male partner has to be reported on the Paternal Form, after an informed consent has been obtained from the male partner.

Initial reporting and follow-up information must be reported **within 14 calendar days** of the investigator's first knowledge of initial or follow-up information.

## 2. Reporting of AE information

The investigator has to report AEs in connection with the pregnancy as well as in the foetus and newborn infant(s). The SAEs that must be reported include abnormal outcome, such as foetal death (including spontaneous abortion), and congenital anomalies (including those observed at gross examination or during autopsy of the foetus), as well as other pregnancy complications fulfilling the criteria of an SAE.

### Forms and timelines for reporting AEs:

Non-serious AEs:

- Paper AE form\* **within 14 calendar days** of the investigator's first knowledge of the initial or follow-up information to the non-serious AE

SAEs:

- Paper AE form\* **within 24 hours** of the investigator's first knowledge of the SAE
- Paper safety information form **within 5 calendar days** of the investigator's first knowledge of the SAE
- **SAE follow-up information** to the AE form and/or safety information form **within 24 hours** of the investigator's first knowledge of the follow-up information

\* It must be clearly stated in the AE diagnosis field on the AE form if the event occurred in the subject, foetus or newborn infant.

Any queries or follow-up requests from Novo Nordisk to non-serious AEs, SAEs and pregnancy forms must be responded to by the investigator **within 14 calendar days** from the date of receipt of the request, unless otherwise specified in the follow-up request.

### 12.6 Precautions and/or overdose

There are no specific antidotes to semaglutide. Treatment of an overdose should be symptomatic.

There is a potential risk of hypoglycaemia during dosing with semaglutide. The typical signs and symptoms of confirmed hypoglycaemia include: hunger, slight headache, nausea, light-headedness, palpitations and sweating. Major hypoglycaemia (severe) may produce loss of consciousness. Symptoms of confirmed and not major hypoglycaemia should be treated by ingestion of carbohydrates.

Major hypoglycaemia resulting in loss of consciousness should be treated at the investigator's discretion according to best available medical practise.



The EAC works in accordance with written guidelines included in the EAC Charter describing in details the composition, tasks, responsibilities, and work processes of the committee.

The events will be adjudicated according to FDA requirements and the adjudication vendor will ensure that the EAC gets access to all the documents provided by the investigator. The EAC will initiate the review and may ask for additional information that the investigator needs to provide if it is available.

The EAC will review copies in English (translated if necessary) of medical documentation received in the adjudication packages (e.g., X-ray images, ECGs, ultrasound images, discharge summaries, pathology reports and death certificates). The investigator must provide medical documentation within 4 weeks of event identification.

The assessments made by the EAC will be included in the CTR as well as assessments made by the investigator. However, the adjudication made by an EAC, given its independence and in-depth analysis of each event, will be attributed with greater importance of the two. The outcomes of adjudication will be kept in the clinical trial database.

The following AEs will be adjudicated in this trial:

- Fatal Events (All events with fatal outcome)
- Acute Coronary Syndrome (Myocardial Infarction, Hospitalization for Unstable Angina)
- Cerebrovascular Events (Stroke, Transient Ischemic Attack)
- Coronary Revascularization Procedure
- Heart Failure requiring Hospital Admission
- Pancreatitis or clinical suspicion of pancreatitis
- Neoplasms
- Thyroid Disease (if thyroid neoplasm or resulting in thyroidectomy)

Event adjudication will not be performed for AEs in screening failures.

There are two processes for capturing AEs for adjudication: Direct reporting of MESIs by the investigator and by potential missed MESI process.

Direct reporting of MESI by investigator: For each AE reported in the eCRF, the investigator must complete whether the event in his/her opinion is a MESI (yes/no).

By ticking YES:

- The investigator must specify the type of MESI event being reported
- The investigator must complete the event adjudication document collection form ('adjudication form') in the eCRF according to the timeline specified in Section [12.2](#). This form indicates the data/documents required for adjudication

- For each required document the investigator should specify/indicate when/if the data/document will be available. If a document is unobtainable this needs to be specified. The investigator must provide medical documentation within 4 weeks of event identification

By ticking NO:

All NOs within the relevant MESI category are screened for being potential missed MESI.

- If needed, the investigator will be asked to provide an explanation of why the event is not reported as a MESI (alternative etiology)
- The vendor or EAC can evaluate an event not initially reported as a MESI for adjudication to be adjudicated. In this case the investigator must provide data/documents required for adjudication as soon as possible when receiving a request from Novo Nordisk or the vendor

A site manual will be provided to each site detailing the specifics surrounding the medical documentation that must be provided by site to the adjudication vendor including how this documentation should be provided.

### **12.7.3 Calcitonin monitoring committee**

The CMC will provide recommendations to the investigators with regards to further investigation and treatment of the individual subject (see Appendix A).

## 13 Case report forms

Novo Nordisk will provide a system for the eCRF. This system and support services to the system will be supplied by a vendor.

Ensure that all relevant questions are answered and that no empty data field exists. If a test or an assessment has not been done and will not be available, or if the question is irrelevant (e.g., is not applicable), indicate this according to the data entry instructions.

The following will be provided as paper CRFs:

- Pregnancy forms

In addition paper AE forms, SIF and technical complaint forms will be provided. These must be used when access to the eCRF is revoked (i.e., EDC system not available).

On the paper CRF forms print legibly, using a ballpoint pen. Ensure that all questions are answered, and that no empty data blocks exist. Ensure that no information is recorded outside the data blocks. If a test/assessment has not been done and will not be available, indicate this by writing “ND” (not done) in the appropriate answer field in the CRF. If the question is irrelevant (e.g., is not applicable) indicate this by writing “NA” (not applicable) in the appropriate answer field. Further guidance can be obtained from the instructions in the CRF.

The investigator must ensure that all information is consistent with the source documentation. By electronically signing the case book in the eCRF, the investigator confirms that the information in the eCRF and related forms is complete and correct.

### 13.1 Corrections to case report forms

Corrections to the eCRF data may be made by the investigator or the investigator’s authorised staff. An audit trail will be maintained in the eCRF application containing as a minimum: the old and the new data, identification of the person entering the data, date and time of the entry and reason for the correction.

If corrections are made by the investigator’s authorised staff after the date the investigator has signed the case book, the case book must be signed and dated again by the investigator.

### 13.2 Case report form flow

The investigator must ensure that data are recorded in the eCRF as soon as possible after the visit, preferably within 5 days. Once data have been entered, they will be available to Novo Nordisk for data verification and validation purposes.



At the end of the trial the investigator must ensure that all remaining data have been entered into the eCRF, preferably within 3 days after the last subject's last visit at the site in order to ensure the planned lock of the database.

Site specific eCRF data (in an electronic readable format) will be provided to the trial site before access to the eCRF is revoked. This data must be retained at the trial site.

### **13.3 Paper case report forms**

The pregnancy forms are paper based CRFs. Also, the SIF, technical complaint form and AE form will be provided in paper but are only to be used if for any reason the eCRF is unavailable.

The investigator must ensure that data are recorded in these forms as soon as possible after the visit and ensure that Novo Nordisk receives these forms within the required timelines (see Sections [12.2](#), [12.4.1](#) and [12.5](#)).

Corrections to the data in the CRFs may only be made by drawing a straight line through the incorrect data and then writing the correct entry next to the data that were crossed out. Each correction must be initialled, dated and explained (if necessary) by the investigator or the investigator's authorised staff.

## 14 Monitoring procedures

During the course of the trial, the monitor will visit the trial site to ensure that the protocol is adhered to, that all issues have been recorded, to perform source data verification and to monitor drug accountability. The first monitoring visit will be performed as soon as possible after FSFV and no later than 4 weeks after. The monitoring visit intervals will depend on the outcome of the remote monitoring of the eCRFs, the trial site's recruitment rate and the compliance of the trial site to the protocol and GCP, but will not exceed 4 weeks during the recruitment period (i.e., from FSFV to last subject first visit (LSFV)). After LSFV the monitoring visit intervals will not exceed 8 weeks.

The monitor must be given direct access to source documents (original documents, data and records). Direct access includes permission to examine, analyse, verify and reproduce any record(s) and report(s) that are important to the evaluation of the trial. If the electronic medical record does not have a visible audit trail, the investigator must provide the monitor with signed and dated printouts. In addition the relevant trial site staff should be available for discussions at monitoring visits and between monitoring visits (e.g., by telephone).

All data must be verifiable in source documentation other than the eCRF (except for BMI).

For all data recorded the source document must be defined in a source document agreement at each trial site. There must only be one source defined at any time for any data element.

For screening failures the monitor will ensure that relevant eCRF pages and other trial-related forms containing data from screening failures are completed. For screening failures the following data should be source verified: informed consent, reason for screening failure and AEs, if any.

Source data generated by the trial site can be corrected by another person than the person entering the source data if accepted by local regulations; any correction must be explained, signed and dated by the person making the correction.

The completed diaries will be collected from the subject at each site visit and must be kept as source data at the site. The investigator/delegate must transcribe the data into the eCRF.

The monitor will ensure that the eCRFs are completed on an ongoing basis and within agreed timelines.

Monitors must review the subject's medical records and other source data (e.g., the diaries and PROs) to ensure consistency and/or identify omissions compared to the eCRF. If discrepancies are found, the investigator must be questioned about these.

A follow-up letter (paper or electronic) will be sent to the investigator following each monitoring visit addressing any action to be taken.

## 15 Data management

Data management is always the responsibility of Novo Nordisk. Data management may be delegated under an agreement of transfer of responsibilities to an external contract research organisation (CRO).

Appropriate measures, including encryption of data files containing person identifiable data, will be used to ensure confidentiality of subject data, when they are transmitted over open networks.

Data from central laboratories will be transferred electronically from the laboratory performing the analyses. In cases where laboratory data are transferred via non-secure electronic networks, data will be encrypted during transfer.

The subject and any biological material obtained from the subject will be identified by subject number and trial identification number. Appropriate measures such as encryption or leaving out certain identifiers will be enforced to protect the identity of subjects in all presentations and publications as required by local, regional and national requirements.

## 16 Computerised systems

Novo Nordisk will capture and process clinical data using computerised systems that are described in Novo Nordisk Standard Operating Procedures and IT architecture documentation. The use and control of these systems are documented.

Investigators working on the trial may use their own electronic systems to capture source data.

## 17 Statistical considerations

If necessary, a statistical analysis plan (SAP) may be written in addition to the protocol, including a more technical and detailed elaboration of the statistical analyses. The SAP will be finalised before database lock.

Results from the statistical analysis will generally be presented by two-sided confidence intervals with a confidence level of 95% including a p-value for test of no difference between treatments.

The stratification variable referred to in the following is defined as the two level factor of treatment with metformin (yes/no).

The “planned comparisons between treatment arms” referred to in this section covers the following comparisons: a) between each of the oral semaglutide treatment arms and placebo, b) between the s.c. semaglutide arm and placebo, c) between each of the oral semaglutide treatment arms and s.c. semaglutide, and d) between the three treatment arms with an end dose of 40 mg.

A standard mixed model for repeated measurements (MMRM) will be used in the analysis of the primary and continuous secondary endpoints. The model will include treatment, country and the stratification variable as fixed factors, and the corresponding baseline value as covariate. All factors and the covariate will be nested within visit. Unless otherwise stated, the estimated differences with corresponding two sided p-values and 95% confidence intervals at 26 weeks will be presented for the planned comparisons between treatment arms.

In order to describe the dose-response relation of oral semaglutide and estimate the relative potency vs. s.c. semaglutide with regards to selected key endpoints, an explorative analysis will be conducted. In this model data from oral semaglutide arms using the standard titration scheme will be included. One or both of the treatment arms with an end dose of 40 mg using an alternative titration scheme may be included and pooled with the oral semaglutide arm with an end dose of 40 mg and using the standard titration scheme, if deemed appropriate based on the planned pairwise comparisons between the arms. Data from the placebo arm (corresponding to a dose of zero mg) could be included if deemed appropriate. The model will be developed ad hoc after unblinding and aim for a suitable fit of the dose-response relation using e.g. a linear or a four-parameter logistic relation of the endpoint of interest vs. the logarithm of the dose.

### 17.1 Sample size calculation

The primary endpoint, change from baseline to end of treatment (i.e., after 26 weeks of treatment) in HbA<sub>1c</sub>, will be analysed by the standard MMRM.

In order to demonstrate efficacy of oral semaglutide the sample size is based on an initial comparison of change from baseline to end of treatment (i.e., after 26 weeks of treatment) in HbA<sub>1c</sub>.

between a) the pool of the two treatment arms using standard and fast escalation regimens, respectively, to an end dose of 40 mg and b) placebo.

A standard deviation (SD) of 1.2% for change from baseline in HbA<sub>1c</sub> is chosen as assumption for the sample size calculation. The SD observed in several phase 3 trials of 26 weeks duration with s.c. liraglutide suggests a standard deviation less than 1.1%. However, as it is uncertain if the added variation in exposure compared to s.c. semaglutide will transfer to an added variation in the therapeutic response, a SD of 1.2% is assumed.

In trial NN9535-1821 the withdrawal rate for the doses 0.2 mg-0.8 mg was 16%-24%. In the present trial, GI events are mitigated by dose escalation and based on this the drop-out rate is expected to be 20%, equally distributed among treatment arms. For completers the treatment difference between the pooled 40 mg arm and placebo is expected to be at least 0.64% whereas for dropouts the treatment difference is set conservatively to 0.32%, thus leading to a detectable mean difference of 0.58%. With these assumptions, and using a two-sided t-test with a significance level of 5%, 134 subjects should be randomised to the pooled 40 mg treatment arm and 67 to placebo in order to have 90% power to demonstrate superiority of the pooled 40 mg treatment arm versus placebo. For similarity between the treatment arms, 67 subjects should be randomised in each of the nine treatment arms.

In total, 603 subjects are to be randomised.

## 17.2 Definition of analysis sets

**Full Analysis Set (FAS):** includes all randomised subjects who have received at least one dose and have any post randomisation data. The statistical evaluation of the FAS will follow the intention-to-treat (ITT) principle and subjects will contribute to the evaluation “as randomised”.

**Safety Analysis Set (SAS):** includes all subjects exposed to at least one dose of randomised semaglutide or semaglutide placebo. Subjects in the SAS will contribute to the evaluation “as treated”.

Before data are locked for statistical analysis, a review of all data will take place. Any decision to exclude a subject or single observations from the statistical analysis is the joint responsibility of the members of the study group. Exclusion of data from analyses will be used restrictively and normally no data should be excluded from the FAS. The subjects or observations to be excluded, and the reasons for their exclusion, must be documented and signed by those responsible before database lock. The subjects and observations excluded from analysis sets, and the reason for this, will be described in the CTR.

### 17.3 Primary endpoint

The primary endpoint, change from baseline to end of treatment (i.e., after 26 weeks of treatment) in HbA<sub>1c</sub>, will be analysed by the standard MMRM.

In order to confirm efficacy of oral semaglutide without risk of inflation of the type 1 error an initial comparison of the primary endpoint between a) the pool of the two treatment arms using standard and fast escalation regimens to an end dose of 40 mg and b) placebo. The comparison will be made using the MMRM by estimating the difference between the mean of means in the two 40 mg arms and the mean in placebo. The estimated difference with corresponding two sided p-value and 95% confidence interval at 26 weeks will be presented, and efficacy of oral semaglutide will be considered confirmed if the upper limit of the confidence interval is strictly less than zero.

If efficacy of oral semaglutide is confirmed the planned comparisons between the nine original treatment arms will be evaluated.

Subjects in the FAS and only measurements taken before treatment discontinuation or initiation of rescue therapy will be included in the analysis.

Due to the uncertainty in relation to if the added variation in the exposure in the oral semaglutide arms compared to s.c. semaglutide will transfer to an added variation in the therapeutic response, a sensitivity analysis allowing the within subject unstructured covariance matrix to be fitted separately for each treatment arm will be conducted.

Furthermore, the following sensitivity analyses will be conducted in order to investigate the sensitivity of the results due to the impact of missing values:

- An MMRM similar to the primary analysis but including all data recorded after randomisation regardless of the data being obtained when the subjects have received rescue therapy or have discontinued randomised treatment.
- An analysis of covariance (ANCOVA) model including subjects in the FAS and using imputation of missing values according to the last observation carried forward (LOCF) method. The model will include fixed factors for treatment, country and the stratification variable and the baseline value as covariate. In accordance with the LOCF method, the dependent variable will be the last available value obtained within the 26 weeks period of the study.
- A completer analysis, i.e. an ANCOVA similar to the one above including only data obtained at 26 weeks from subjects who:
  - did not discontinue treatment prematurely
  - did not receive rescue therapy
  - had a valid HbA<sub>1c</sub> assessment at baseline and after 26 weeks of treatment

## 17.4 Supportive secondary endpoints

### 17.4.1 Efficacy endpoints

The FAS will be used in all analyses of the supportive secondary efficacy endpoints.

#### **Subjects who, after 26 weeks of treatment, achieve (yes/no) HbA<sub>1c</sub> <7% (53 mmol/mol)**

The binary endpoint will be analysed by a logistic regression model which will include fixed factors for treatment and the stratification variable and baseline HbA<sub>1c</sub> as a covariate. Estimated odds ratios with corresponding two sided p-values and 95% confidence intervals at 26 weeks will be presented for the planned comparisons between treatment arms. Missing response data at 26 weeks will be imputed from the MMRM used for the primary analysis of HbA<sub>1c</sub>.

#### **Change from baseline to week 26 in body weight, waist circumference and fasting plasma glucose.**

These endpoints will be analysed by the standard MMRM.

#### **Change from baseline to week 26 in C-peptide, fasting insulin, glucagon, HOMA-IR, HOMA-B, total cholesterol, LDL-cholesterol, HDL-cholesterol, VLDL-cholesterol, triglycerides and free fatty acids.**

For each endpoint, the assessments at every week will be log-transformed and subsequently analysed by the standard MMRM. The estimated differences and corresponding 95% confidence intervals at 26 weeks will be back transformed and presented as ratios together with the two sided p-values.

The fasting HOMA endpoints (i.e., fasting HOMA-B and HOMA-IR) will be calculated based on fasting insulin and FPG as follows:

1. Fasting HOMA-B (%) =  $20 \times \text{fasting insulin } [\mu\text{U/ml}] / (\text{FPG}[\text{mmol/L}] - 3.5)$
2. Fasting HOMA-IR (%) =  $\text{fasting insulin } [\mu\text{U/ml}] \times \text{FPG } [\text{mmol/L}] / 22.5$

### **PRO outcomes**

The outcomes from the SF-36 in terms of total scores overall and within each domain will be calculated and each of these scores will be analysed by the standard MMRM.

### 17.4.2 Safety endpoints

All safety endpoints will be summarised and analysed using the safety analysis set. Unless otherwise specified safety endpoints will be analysed by descriptive statistics only.



## Adverse events

All AEs will be coded using the most recent version of the Medical Dictionary for regulatory Activities (MedDRA) coding. A TEAE is defined as an event that has onset date (or increase in severity) on or after the first day of exposure to randomised treatment and no later than the follow-up visit. TEAEs are summarised descriptively, whereas non-treatment emergent AEs are presented in listings.

## Number of confirmed treatment emergent hypoglycaemic episodes

A hypoglycaemic episode will be defined as *treatment emergent* if the onset of the episode occurs on or after the first day of trial product administration and no later than the follow-up visit.

Hypoglycaemic episodes are classified according to the Novo Nordisk classification of confirmed hypoglycaemia and the ADA classification of hypoglycaemia (see [Figure 17-1](#)).

## Confirmed hypoglycaemia

In normal physiology, symptoms of hypoglycaemia occur below a plasma glucose level of 3.1 mmol/L (56 mg/dL)<sup>14</sup>. Therefore, Novo Nordisk has included hypoglycaemia with plasma glucose levels below this cut-off point in the definition of confirmed hypoglycaemia.

*Confirmed* hypoglycaemic episodes are defined as episodes that are:

- severe according to the ADA classification below and/or
- biochemically confirmed by a plasma glucose value of <3.1 mmol/L (56 mg/dL), with or without symptoms consistent with hypoglycaemia

## ADA classification<sup>15</sup> of hypoglycaemia

- *Severe hypoglycaemia*: An episode requiring assistance of another person to actively administer carbohydrate, glucagon, or take other corrective actions. Plasma glucose concentrations may not be available during an event, but neurological recovery following the return of plasma glucose back to normal is considered sufficient evidence that the event was induced by a low plasma glucose concentration.
- *Asymptomatic hypoglycaemia*: An episode not accompanied by typical symptoms of hypoglycaemia, but with a measured plasma glucose concentration  $\leq 3.9$  mmol/L (70 mg/dL)
- *Documented symptomatic hypoglycaemia*: An episode during which typical symptoms of hypoglycaemia are accompanied by a measured plasma glucose concentration  $\leq 3.9$  mmol/L (70 mg/dL).
- *Pseudo-hypoglycaemia*: An episode during which the person with diabetes reports any of the typical symptoms of hypoglycaemia with a measured plasma glucose concentration  $> 3.9$  mmol/L (70 mg/dL) but approaching that level.

- *Probable symptomatic hypoglycaemia*: An episode during which symptoms of hypoglycaemia are not accompanied by a plasma glucose determination (but that was presumably caused by a plasma glucose concentration  $\leq 3.9$  mmol/L (70 mg/dL).

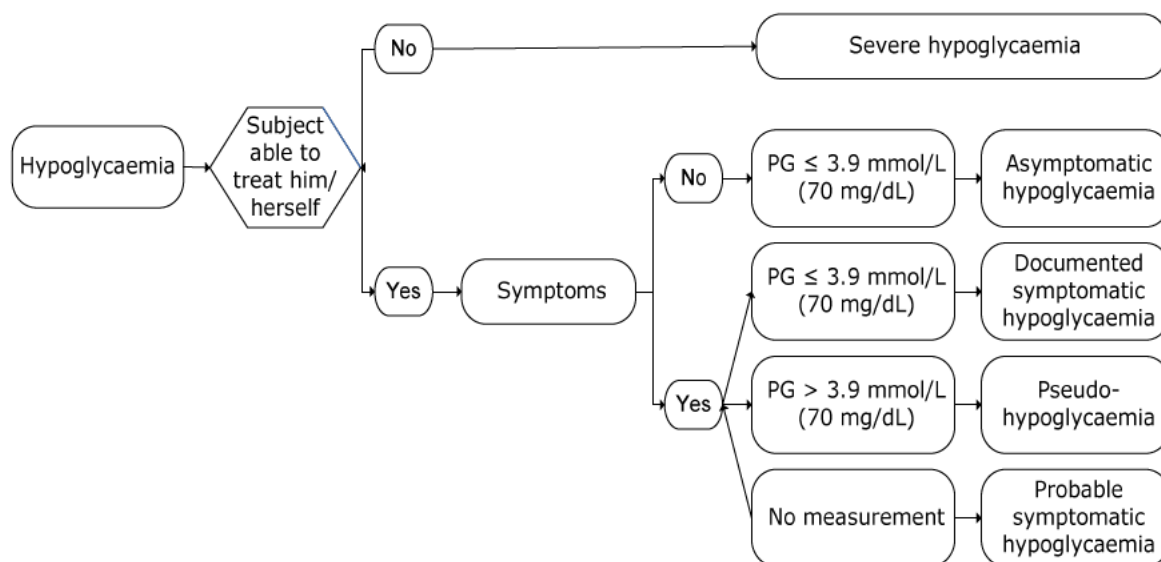

**Figure 17–1 ADA classification of hypoglycaemia**

Data on treatment emergent hypoglycaemic episodes will be summarised descriptively using the above definitions.

The number of confirmed treatment emergent hypoglycaemic episodes during 26 weeks treatment will be analysed using a negative binomial regression model with a log-link function and the logarithm of the time period in which an occurrence of a hypoglycaemic episode is considered treatment emergent as offset. The model will include treatment, country and stratification variable as fixed factors and baseline HbA<sub>1c</sub> as covariate. Estimated rate ratios with corresponding two sided p-values and 95% confidence intervals at 26 weeks will be presented for the planned comparisons between treatment arms.

**Change in pulse, systolic- and diastolic blood pressure from baseline to after 26 weeks of treatment**

These endpoints will be analysed by the standard MMRM.

**Change in amylase and lipase from baseline to after 26 weeks of treatment**

For each endpoint, the assessments at every week will be log-transformed and subsequently analysed by the standard MMRM. The estimated differences and corresponding 95% confidence

intervals at 26 weeks will be back transformed and presented as ratios together with the two sided p-values.

**Change from baseline to after 26 weeks of treatment in electrocardiogram (ECG), physical examination, laboratory safety variables (haematology, biochemistry, hormone and urinalysis) other than amylase and lipase**

These endpoints will be summarised by descriptive statistics.

**Endpoints related to occurrence of anti-semaglutide antibodies during 26 weeks of treatment: Antibody level during 26 weeks of treatment, anti-semaglutide antibodies (positive/negative), anti-semaglutide antibodies with *in vitro* neutralising effect (positive/negative), anti-semaglutide antibodies cross reacting with endogenous GLP-1 (positive/negative), cross reacting antibodies with *in vitro* neutralising effect to endogenous GLP-1 (positive/negative)**

These endpoints will be summarised by descriptive statistics and correlated to PK and PD.

#### **17.4.3 Pharmacokinetics and/or pharmacodynamics modelling**

If relevant, population PK and PK/PD modelling will be used to evaluate semaglutide exposure and exposure-response relationship after oral and subcutaneous administration in subjects with T2D to inform dose selection in future trials.

The objectives of these exploratory analyses are to:

- assess the dose-dependence of semaglutide exposure in plasma
- explore the effects of covariates on semaglutide exposure
- explore the relationship between semaglutide exposure and response variables of interest

The modelling will be performed by Quantitative Clinical Pharmacology at Novo Nordisk A/S and will be reported separately from the CTR.

## 18 Ethics

The trial will be conducted in compliance with ICH GCP<sup>1</sup> and applicable regulatory requirements, and in accordance with the Declaration of Helsinki<sup>2</sup>.

All subjects will be included after a thorough evaluation in regards to in- and exclusion criteria defined in order to ensure that subjects are eligible for trial treatment. Subjects will be treated within a regimen anticipated to be better than or equal to the treatment they receive at the time of entry into the trial. However, they will have to spend some extra time, as additional assessments and visits to the clinic are required. It is the responsibility of the investigator to ensure the best possible care according to the principles outlined in Diabetes Care 2013, Standards of Medical Care in Diabetes<sup>16</sup>, or any updates thereof.

It is concluded that the potential benefits from participating in the trial outweigh the potential risks. The safety profile of semaglutide generated from the clinical and nonclinical development programme has not revealed any safety issues that would prohibit administration of once-daily oral doses of 2.5-40 mg semaglutide or once-weekly doses of 1.0 mg semaglutide in accordance with the planned clinical trial. Furthermore, a rescue strategy is implemented in this trial to ensure the safety of subjects experiencing deterioration of glycaemic control during the course of the trial to address the concern regarding the placebo arm and the inclusion of patients with an HbA<sub>1c</sub> up to 9.5%. It is concluded that the risk to the subjects in this trial is low and acceptable in view of the benefits a GLP-1 analogue in a tablet formulation would provide to people with T2D.

The trial products may be associated with AEs, but relevant precautions have been implemented in the design and planned conduct of the trial in order to minimise the risks and inconveniences of participation in the trial. These precautions include thorough information regarding the correct administration of the trial products and gradual dose adjustment. Furthermore, subjects are fully informed about possible AEs and inconveniences and will be instructed to contact the investigator in case of any concerns regarding the trial participation.

### 18.1 Informed consent

In seeking and documenting informed consent, the investigator must comply with applicable regulatory requirement(s) and adhere to ICH GCP<sup>1</sup> and the requirements in the Declaration of Helsinki<sup>2</sup>.

Before any trial-related activity, the investigator must give the subject verbal and written information about the trial and the procedures involved in a form that the subject can read and understand. The subject is allowed to bring a companion when the oral information is provided.

The subjects must be fully informed of their rights and responsibilities while participating in the trial as well as possible disadvantages of being treated with the trial products.

The investigator must ensure the subject ample time to come to a decision whether or not to participate in the trial.

A voluntary, signed and personally dated informed consent form will be obtained from the subject before any trial-related activity.

The responsibility for seeking informed consent must remain with the investigator, but the task may be delegated by the investigator to a medically qualified person, in accordance with local requirements. The written informed consent must be signed and personally dated by the person who seeks the informed consent before any trial-related activity.

If information becomes available that may be relevant to the subject's willingness to continue participating in the trial, the investigator must inform the subject in a timely manner and a revised written subject information must be provided and a new informed consent must be obtained.

## **18.2 Data handling**

If the subject is withdrawn from the trial or lost to follow-up, then the subject's data will be handled as follows:

- Data already collected will be retained by Novo Nordisk, entered into the database and used for the trial report
- Safety events will be reported to Novo Nordisk and regulatory authorities according to local and national requirements

If data are used, it will always be in accordance with local law and IRBs/IECs.

## **18.3 Premature termination of the trial and/or trial site**

Novo Nordisk, the investigator, the IRBs/IECs or a regulatory authority may decide to stop the trial, part of the trial or a trial site at any time, but agreement on procedures to be followed must be obtained.

If a trial is suspended or prematurely terminated, the investigator must inform the subjects promptly and ensure appropriate therapy and follow-up. The investigator and/or Novo Nordisk should also promptly inform the IRBs/IECs and provide a detailed written explanation. The relevant regulatory authorities should be informed.

If, after the termination of the trial, the risk/benefit analysis changes, the new evaluation should be provided to the IRBs/IECs in case it has an impact on the planned follow-up of subjects who have participated in the trial. If it does have an impact, the actions needed to inform and protect the subjects should be described.

An interim analysis to allow for premature discontinuation of the trial has not been planned.

## 19 Protocol compliance

Deviations from the protocol should be avoided.

If deviations do occur, the investigator must inform the monitor and the implications of the deviation must be reviewed and discussed.

Deviations must be documented and explained in a protocol deviation by stating the reason, date, and the action(s) taken. Some deviations, for which corrections are not possible, can be acknowledged and confirmed via edit checks in the eCRF or via listings from the clinical database.

Documentation on all protocol deviations must be kept in the investigator's trial file and Novo Nordisk trial master file.

## 20 Audits and inspections

Any aspect of the clinical trial may be subject to audits conducted by Novo Nordisk or inspections from domestic or foreign regulatory authorities or from IRBs/IECs. Audits and inspections may take place during or after the trial. The investigator and the site staff as well as Novo Nordisk staff have an obligation to cooperate and assist in audits and inspections. This includes giving auditors and inspectors direct access to all source documents and other documents at the trial site relevant to the clinical trial. This includes permission to examine, analyse, verify and reproduce any record(s) and report(s) that are relevant to the evaluation of the trial.

## 21 Critical documents

Before a site is allowed to start screening subjects, the following documents must be available to Novo Nordisk:

- Regulatory approval and/or acknowledgement of notification as required
- Approval/favourable opinion from IRBs/IECs clearly identifying the documents reviewed as follows: protocol, any substantial protocol amendments, subject information/informed consent form, any other written information to be provided to the subject and subject recruitment materials
- List of IRB/IEC members and/or constitution
- Curricula vitae of the investigator and sub-investigator(s) (current, dated and signed – must include documented GCP training or a certificate)
- Signed receipt of Investigator's Brochure
- Signed and dated agreement on the final protocol
- Signed and dated agreement on any substantial protocol amendment, if applicable
- Financial agreement(s)
- Source document agreement
- Central laboratory certification and normal ranges
- Insurance statement, if applicable
- Signed and dated Investigator Agreement
- Financial disclosure form for all investigators
- For US trial sites: verification under disclosures per Code of Federal Regulations (CFR) of Financial Conflict of Interest
- For US trial sites: FDA Form 1572 must be completed and signed by each investigator

### **FDA form 1572:**

For US sites:

- Intended for US sites
- Conducted under the IND
- All US investigators, as described above, will sign FDA form 1572

### **FDA form 1572 (for sites outside the US):**

For sites outside the US:

- Intended for participating sites outside of the US
- Not conducted under the IND
- All investigators outside of the US will not sign FDA form 1572

Novo Nordisk will analyse and report data from all sites together.



Protocol  
Trial ID: NN9924-3790  
UTN: U1111-1136-4716  
EudraCT No.: 2012-004994-16

~~CONFIDENTIAL~~

Date: 21 January 2014  
Version: 3.0  
Status: Final  
Page: 89 of 98

**Novo Nordisk**

By signing the protocol, each investigator agrees to comply fully with ICH GCP<sup>1</sup>, applicable regulatory requirements and the Declaration of Helsinki.<sup>2</sup>

By signing the protocol, each investigator also agrees to allow Novo Nordisk making investigator's name and information about site name and address publically available if this is required by national or international regulations.

## 22 Responsibilities

The investigator is accountable for the conduct of the trial at his/her site. If any tasks are delegated, the investigator should maintain a list of appropriately qualified persons to whom he/she has delegated specified significant trial-related duties. The investigator should ensure that there is adequate training for all staff participating in the conduct of the trial. It is the investigator's responsibility to supervise the conduct of the trial and to protect the rights, safety and well-being of the subjects.

A qualified physician, who is an investigator or a sub-investigator for the trial, must be responsible for all trial-related medical decisions.

The investigator must ensure adequate supervision of the conduct of the trial at the trial site.

The investigator will follow instructions from Novo Nordisk when processing data.

The investigator is responsible for filing essential documents (i.e., those documents which individually and collectively permit evaluation of the conduct of a trial and the quality of the data produced) in the investigator's trial file. The documents should be kept in a secure locked facility, so no unauthorized persons can get access to the data. The subject ID list should be kept securely and separate from the personal data.

The investigator will take all necessary technical and organisational safety measures to prevent accidental or wrongful destruction, loss or deterioration of data. The investigator will prevent any unauthorised access to data or any other processing of data against applicable law. The investigator must be able to provide the necessary information or otherwise demonstrate to Novo Nordisk that such technical and organisational safety measures have been taken.

During any period of unavailability, the investigator must delegate responsibility for medical care of subjects to a specific qualified physician who will be readily available to subjects during that time.

The investigator must keep a log of staff and delegation of task(s) at site. The investigator must sign the log of staff and delegation of task(s) at site at the time of delegation of tasks.

If the investigator is no longer able to fulfil the role of investigator (e.g., if he/she moves or retires), a new investigator will be appointed in consultation with Novo Nordisk.

The investigator and site personnel must have sufficient English skills according to their assigned task(s).

Protocol  
Trial ID: NN9924-3790  
UTN: U1111-1136-4716  
EudraCT No.: 2012-004994-16

~~CONFIDENTIAL~~

|          |                 |                     |
|----------|-----------------|---------------------|
| Date:    | 21 January 2014 | <b>Novo Nordisk</b> |
| Version: | 3.0             |                     |
| Status:  | Final           |                     |
| Page:    | 91 of 98        |                     |

Novo Nordisk will be responsible for the preparation of the protocol, eCRF, supply of trial products and stated equipment, monitoring, data management, statistics and the CTR as documented by Novo Nordisk procedures and internal specific agreements as well as the current GCP guidelines<sup>1</sup>.

Novo Nordisk will provide a system for EDC. This system and support services to the system will be supplied by a vendor. The activities of the vendor will be under the direction and supervision of Novo Nordisk. Furthermore, Novo Nordisk will be responsible for the IV/WRS.

A central laboratory will be responsible for providing all lab supplies for the analysis of all blood and urine samples taken during the trial. All results are received as paper copies at the sites as well as electronic transfer to Novo Nordisk clinical database.

The name of the central laboratories is listed in protocol attachment I.

## 23 Reports and publications

The information obtained during the conduct of this trial is considered confidential, and may be used by Novo Nordisk for regulatory purposes and for the general development of the trial product. All information supplied by Novo Nordisk in connection with this trial shall remain the sole property of Novo Nordisk and is to be considered confidential information. No confidential information shall be disclosed to others without prior written consent from Novo Nordisk. Such information shall not be used except in the performance of this trial. The information obtained during this trial may be made available to other physicians who are conducting other clinical trials with the trial product, if deemed necessary by Novo Nordisk.

The CTR will be reviewed and signed by one or more investigator(s) (signatory investigator) appointed by Novo Nordisk based on their experience in clinical research and input during the analysis phase.

### 23.1 Communication of results

Novo Nordisk commits to communicating, and otherwise making available for public disclosure, results of trials regardless of outcome. Public disclosure includes publication of a paper in a scientific journal, abstract submission with a poster or oral presentation at a scientific meeting, or disclosure by other means.

Novo Nordisk reserves the right to defer the release of data until specified milestones are reached, for example when the CTR is available. This includes the right not to release the results of interim analyses, because the release of such information may invalidate the results of the entire trial.

At the end of the trial, one or more public disclosures may be prepared collaboratively by the investigator(s) and Novo Nordisk. Novo Nordisk reserves the right to postpone publication and/or communication for up to 60 days to protect intellectual property.

The results of this trial will be subject to public disclosure on external web sites according to international regulations, as reflected in the Novo Nordisk Code of Conduct for Clinical Trial Disclosure.

In all cases the trial results will be reported in an objective, accurate, balanced and complete manner, with a discussion of the strengths and limitations. All authors will be given the relevant statistical tables, figures and reports needed to support the planned publication. In the event of any disagreement on the content of any publication, both the investigators' and Novo Nordisk opinions will be fairly and sufficiently represented in the publication.

Where required by the journal, the principal investigator from each trial site will be named in an acknowledgement or in the supplementary material, as specified by the journal.

Novo Nordisk maintains the right to be informed of plans by any investigator to publish and to review any scientific paper, presentation, communication or other information concerning the investigation described in this protocol. Any such communication must be submitted in writing to the Novo Nordisk trial manager before submission for comments. Comments will be given within four weeks from receipt of the planned communication.

### **23.1.1 Authorship**

Authorship of publications should be in accordance with the Uniform Requirements of the International Committee of Medical Journal Editors (sometimes referred to as the Vancouver Criteria<sup>17</sup>).

At the end of the trial, one or more publications (abstracts, posters, manuscripts) will be prepared for submission to scientific congresses and peer-reviewed journals in collaboration between Novo Nordisk and investigator(s) appointed by Novo Nordisk. These investigator(s) must meet the ICMJE authorship criteria to be named authors on publications.

### **23.1.2 Site-specific publication(s) by investigator(s)**

For a multi-centre clinical trial, analyses based on single-site data usually have significant statistical limitations and frequently do not provide meaningful information for healthcare professionals or subjects, and therefore may not be supported by Novo Nordisk. It is a Novo Nordisk policy that such individual reports do not precede the primary manuscript and should always reference the primary manuscript of the trial.

Novo Nordisk reserves the right to prior review of such publications. Further to allow for the primary manuscript to be published as the first, Novo Nordisk asks for deferment of publication of individual site results until the primary manuscript is accepted for publication. As Novo Nordisk wants to live up to the industry publication policy, submission for publication of such primary policy will take place no later than 18 months after trial completion.

### **23.2 Investigator access to data and review of results**

As owner of the trial database, Novo Nordisk has the discretion to determine who will have access to the database.

Individual investigators will have their own research participants' data and will be provided with the randomisation code after results are available.

## 24 Retention of clinical trial documentation and human biospecimens

### 24.1 Retention of clinical trial documentation

Subject's medical records must be kept for the maximum period permitted by the hospital, institution or private practice.

The investigator must agree to archive the documentation (this includes both electronic and paper-based records) pertaining to the trial in an archive after completion or discontinuation of the trial if not otherwise notified. The investigator should not destroy any documents without prior permission from Novo Nordisk. If the investigator cannot archive the documents at the trial site, Novo Nordisk can refer the investigator to an independent archive provider that has a system in place to allow only the investigator to access the files.

The investigator must be able to access his/her trial documents without involving Novo Nordisk in any way. Site-specific CRFs and other subject data (in an electronic readable format or as paper copies or prints) will be provided to the investigator before access is revoked to the systems and/or electronic devices supplied by Novo Nordisk. These data must be retained by the site. If the Novo Nordisk provided data (e.g., the CD-ROM) is not readable during the entire storage period, the investigator can request a new copy, as a copy of all data will be stored by Novo Nordisk.

Novo Nordisk will maintain Novo Nordisk documentation pertaining to the trial for as long as the product is on the market plus 20 years.

The files from the investigator site/institution must be retained for 15 years after the completion of the trial, or longer if required by national regulations. The deletion process must ensure confidentiality of data and must be done in accordance with local regulatory requirements.

### 24.2 Retention of human biospecimens

Serum samples (3-4 mL) of antibodies to semaglutide will be stored at the CRO after finalisation of the CTR (see Section [8.5](#)). The retained antibody samples will only be used for further characterisation of antibodies against semaglutide if required by health authorities or for safety. The samples will remain anonymous (no personal data will be received).

Samples will be stored for up to ten years or until approval by health authorities. They may be transferred from the CRO to Novo Nordisk. Only Novo Nordisk and the CRO/laboratory will have access to the samples.

There are no potential consequences for the subjects or their relatives on the potential use of the antibody samples stored.

## **25 Institutional Review Boards/Independent Ethics Committees and regulatory authorities**

### **IRB/IEC:**

Written approval or favourable opinion must be obtained from IRB/IEC prior to commencement of the trial.

During the trial, the investigator or sponsor, as applicable, must promptly report the following to the IRB/IEC, in accordance with local requirements: updates to IB, unexpected SAEs where a causal relationship cannot be ruled out, protocol amendments according to local requirements, deviations to the protocol implemented to eliminate immediate hazards to the subjects, new information that may affect adversely the safety of the subjects or the conduct of the trial (including new risk/benefit analysis in case it will have an impact on the planned follow-up of the subjects), annually written summaries of the trial status and other documents as required by the local IRB/IEC.

The investigator must ensure submission of the clinical trial report synopsis to the IRB/IEC.

Protocol amendments must not be implemented before approval or favourable opinion according to local regulations, unless necessary to eliminate immediate hazards to the subjects.

The investigator must maintain an accurate and complete record of all submissions made to the IRB/IEC. The records should be filed in the investigator's trial file and copies must be sent to Novo Nordisk.

### **Regulatory Authorities**

Regulatory authorities will receive the clinical trial application (CTA) or clinical trial notification, protocol amendments, reports on SAEs and the CTR according to national requirements.

## 26 Indemnity statement

Novo Nordisk carries product liability for its products, and liability is assumed under the special laws, acts and/or guidelines for conducting clinical trials in any country, unless others have shown negligence.

Novo Nordisk assumes no liability in the event of negligence, or any other liability by the clinics or investigators conducting the trial, or by persons for whom the said site or investigator are responsible.

Novo Nordisk accepts liability in accordance with:

- For Germany: Drug Law dated August 24, 1976 last amended by Second Law for Changes in Regulations on Drugs and Other Issues dated October 19, 2012.
- For Spain: Royal decree 223/2004, of 6th February, establishing the requisites concerning clinical trials.



## 27 References

- 1 International Conference on Harmonisation. ICH Harmonised Tripartite Guideline. Good Clinical Practice. 01-May-1996.
- 2 World Medical Association. Declaration of Helsinki. Ethical Principles for Medical Research Involving Human Subjects. 59th WMA General Assembly, Seoul. 1-Oct-2008. Last amended by the 64<sup>th</sup> WMA General Assembly, Fortaleza, Brazil, October 2013.
- 3 Bittner B, McIntyre C, Jordan P, Schmidt J. Drug-drug interaction study between a novel oral ibandronate formulation and metformin. *Arzneimittelforschung* 2011; 61(12):707-713.
- 4 McIntyre C, Schmidt J, Castelli M, Bittner B. Study on the impact of SNAC (sodium N-[8-(2-hydroxybenzoyl) amino] caprylate) on the bioavailability of ibandronate (IBN) in postmenopausal women. *J.DRUG DEL.SCI.TECH.*, 21 (6) 521-525 2011.
- 5 Investigator's Brochure Semaglutide (subcutaneous administration), Edition 8. 7 Jun 2013.
- 6 Investigator's Brochure Oral administration of semaglutide (NN9924), Edition 5. 21 Jun 2013.
- 7 International Conference on Harmonisation; Guidance on M3(R2) Nonclinical Safety Studies for the Conduct of Human Clinical Trials and Marketing Authorization for Pharmaceuticals; availability. Notice. *Fed Regist* 2010; 75(13):3471-3472.
- 8 Emisphere Technologies I. ERP-12/7, clinical trial report: A Randomized, Double-Blind, Multicenter Study Comparing the Safety and Efficacy of Two Dosing Regimens of Oral EMISPHERE SNAC/Heparin with Subcutaneous Enoxaparin Sodium for the Prevention of Venous Thromboembolic Events Following Elective Total Hip Replacement Surgery. 20 Nov 2002.
- 9 Inzucchi SE, Bergenstal RM, Buse JB, Diamant M, Ferrannini E, Nauck M, et al. Management of hyperglycemia in type 2 diabetes: a patient-centered approach: position statement of the American Diabetes Association (ADA) and the European Association for the Study of Diabetes (EASD). *Diabetes Care* 2012 Jun;35(6):1364-79.
- 10 De Angelis C., Drazen JM, Frizelle FA, Haug C, Hoey J, Horton R et al. Clinical trial registration: a statement from the International Committee of Medical Journal Editors. *N Engl J Med* 2004; 351(12):1250-1251.
- 11 Food and Drug Administration Amendments Act (FDAAA), VIII-CLINICAL TRIAL DATABASES, SEC. 801. EXPANDED CLINICAL TRIAL REGISTRY DATA BANK, 27-Sep-2007.

- 12 European Commission. Detailed guidance on the European clinical trials database (EUDRACT Database) April 2003 and successor documents CT 5.1 Amendment describing the Development of EurdaCT- Lot 1 for 1 May 2004 and CT 5.2 EudraCT core dataset.
- 13 European Union. The rules governing medicinal products in the European Union, volume 4, Annex 13, Manufacture of Investigational Medicinal Products - Brussels. 3 Feb 2010.
- 14 Schwartz NS, Clutter WE, Shah SD, Cryer PE. Glycemic thresholds for activation of glucose counterregulatory systems are higher than the threshold for symptoms. *J Clin Invest* 1987; 79(3):777-781.
- 15 Seaquist ER, Anderson J, Childs B, Cryer P, Dagogo-Jack S, Fish L et al. Hypoglycemia and diabetes: a report of a workgroup of the American Diabetes Association and the Endocrine Society. *Diabetes Care* 2013; 36(5):1384-1395.
- 16 Standards of medical care in diabetes--2013. *Diabetes Care* 2013; 36 Suppl 1:S11-S66.
- 17 International Committee of Medicinal Journal Editors. Uniform Requirements for Manuscripts submitted to Biomedical Journals. *N Engl J Med* 1997; 336:309-315.

Protocol Amendment  
Trial ID: NN9924-3790  
UTN: U1111-1136-4716  
EudraCT No.: 2012-004994-16

~~CONFIDENTIAL~~

Date:  
Version:  
Status:  
Page:

05 September 2013  
1.0  
Final  
1 of 4

**Novo Nordisk**

**Protocol Amendment**  
**no 1**  
**to Protocol, Final Version 1.0**  
**dated 25 June 2013**

**Trial ID:NN9924-3790**

**Multiple dose trial examining dose range, escalation and efficacy of oral semaglutide in subjects with type 2 diabetes**

**Trial phase: 2**

**Applicable to Sweden**

**Amendment originator:**

  
Clinical Research, Sweden

~~This confidential document is the property of Novo Nordisk. No unpublished information contained herein may be disclosed without prior written approval from Novo Nordisk. Access to this document must be restricted to relevant parties.~~

## Table of contents

|                                                                            | <i>Page</i> |
|----------------------------------------------------------------------------|-------------|
| <b>1 Introduction including rationale for the protocol amendment .....</b> | <b>3</b>    |
| <b>2 Changes .....</b>                                                     | <b>4</b>    |

## **1 Introduction including rationale for the protocol amendment**

This local substantial amendment for Sweden implements the requirement for a changed definition on adequate contraceptive measures for patients participating in the trial in Sweden as requested by the Medical Products Agency (MPA).

In this protocol amendment:

- Any new text is written *in italics*.
- Any text deleted from the protocol is written using strike through.

## 2 Changes

### 2.1. Section 6.3 Exclusion criteria

The following text will be changed under exclusion criteria No 3:

~~*Sweden: Adequate contraceptive measures are hormonal intrauterine devices, hormonal oral contraceptives, hormonal implants or injections, double barrier (a condom or diaphragm) with spermicide, sexual abstinence or vasectomised partner.*~~

is re-written according to the explicit request by the MPA to:

*Sweden: Oral (except low-dose gestagen (lynestrenol and norethisteron)), injectable, or implanted hormonal contraceptives, intrauterine device, intrauterine system (for example, progestin-releasing coil), vasectomized male (with appropriate postvasectomy documentation of the absence of sperm in the ejaculate).*

**Protocol Amendment**  
**no 2**  
**to Protocol, final version 1.0**  
**dated 25 June 2013**  
**including all amendments**

**Trial ID: NN9924-3790**

**Multiple dose trial examining dose range, escalation and  
efficacy of oral semaglutide in subjects with type 2 diabetes**

**Trial phase: 2**

**Applicable to all countries**

Amendment originator:

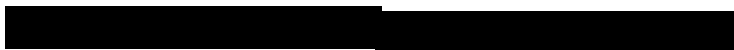

Clinical Operations 2, Semaglutide & Oral GLP-1

This ~~confidential~~ document is the property of Novo Nordisk. ~~No unpublished information contained herein may be disclosed without prior written approval from Novo Nordisk. Access to this document must be restricted to relevant parties.~~

## Table of contents

|                                                                                                              | <i>Page</i> |
|--------------------------------------------------------------------------------------------------------------|-------------|
| <b>1 Introduction including rationale for the protocol amendment .....</b>                                   | <b>3</b>    |
| <b>2 Changes .....</b>                                                                                       | <b>4</b>    |
| 2.1 Section 2.1 Flow chart foot notes .....                                                                  | 4           |
| 2.2 Section 5.2 Rationale for trial design.....                                                              | 4           |
| 2.3 Section 6.4 Rescue criteria.....                                                                         | 4           |
| 2.4 Section 8.4.7 Electrocardiogram – 12-lead.....                                                           | 5           |
| 2.5 Section 8.4.10 Pharmacokinetics .....                                                                    | 5           |
| 2.6 Section 12.1 Definitions .....                                                                           | 5           |
| 2.7 Section 12.2 Reporting of adverse events.....                                                            | 5           |
| 2.8 Section 12.7.2 Event adjudication committee.....                                                         | 6           |
| 2.9 Section 17.1 Sample size calculation.....                                                                | 6           |
| 2.10 Section 17.2 Definition of analysis sets.....                                                           | 6           |
| 2.11 Section 17.3 Primary endpoint.....                                                                      | 6           |
| 2.12 Section 17.4.2 Safety endpoints.....                                                                    | 6           |
| 2.13 Section 25 Institutional Review Boards/Independent Ethics Committees and regulatory<br>authorities..... | 7           |
| 2.14 Section 27 References.....                                                                              | 8           |



## 1 Introduction including rationale for the protocol amendment

The HbA<sub>1c</sub> criterion will be removed as part of the rescue criteria during the treatment period. It has been judged that there is a risk of having an inappropriately high proportion of the subjects requiring rescue due to high HbA<sub>1c</sub> levels during the trial. Hence it has been decided to only assess the need for rescue medication based on confirmed fasting plasma glucose levels. As described in the statistical section, subjects on rescue medication will not be included in the primary analysis (only data up to the point of rescue) meaning that a high number of subjects on rescue medication could potentially invalidate the data and trial results. The investigator can at anytime during the trial decide to discontinue trial product and initiate other treatment if any safety issues are seen, consequently this change is not assessed to have any safety risks for the subjects.

The process of reporting central ECG evaluation back to investigator has been changed. Only clinically significant abnormal findings as evaluated by the central reader will be sent to the investigator. The investigators will do their own assessment at site, hence it is not relevant to inform the investigator of all findings as this would increase the workload significantly at the site without adding value with regards to the safety of the subject.

The ADA classification of hypoglycaemia has recently been updated. The protocol has been updated to be aligned with the new definition. Furthermore, the section on IRB and IEC has been updated to comply with the recent update of the Declaration of Helsinki.

The definition of thyroid events for adjudication has been updated to add clarity and to be aligned with the Event Adjudication Charter. Thyroid events must be reported for adjudication both in case of thyroid neoplasm AND in case of thyroidectomies regardless of indication.

In addition, minor inconsistencies and errors have been corrected.

In this protocol amendment:

- Any new text is written *in italics*.
- Any text deleted from the protocol is written using ~~strike through~~.

## 2 Changes

### 2.1 Section 2.1 Flow chart foot notes

x<sup>6</sup>: Trough and peak PK sampling is only applicable for subjects in the oral treatment arms *and replaces the regular PK sampling for these subjects at visits 4, 8 and 11*. Subjects must attend the visit without having taken the tablet on the same day (see Section 8.4.10)

x<sup>8</sup>: Fasting *for lab sampling* is defined as having consumed only water since midnight. For the Follow-up visit (V12) attending fasting is defined as having consumed only water for at least the preceding 2 hours. *For the trough and peak PK sampling visits (V4, 8, 11) the fasting is outlined in section 5.3.1.*

### 2.2 Section 5.2 Rationale for trial design

Parallel treatment groups and a randomised partially-blinded, controlled design have been chosen in accordance with the trial objectives. To avoid bias in the assessment of the different doses of oral semaglutide, the eight oral treatment arms are double-blind. The doses are escalated in standard four week intervals to limit gastrointestinal AEs. Escalation intervals of two weeks and ~~six~~ *eight* weeks are also being explored to investigate effect on onset of action and overall AEs.

### 2.3 Section 6.4 Rescue criteria

~~Subjects with unacceptable hyperglycaemia should be offered treatment intensification (rescue medication) according to local label at the discretion of the investigator as add-on to randomised treatment and should continue to follow the protocol specified visit schedule. Rescue medication should exclude other incretin-based therapies such as other GLP-1 receptor agonists, DPP-4 inhibitors and amylin analogues.~~

~~Unacceptable hyperglycaemia in this trial is defined as:~~

- ~~● FPG >15 mmol/L (270 mg/dL) from baseline to week 6~~
- ~~● FPG >13.3 mmol/L (240 mg/dL) from week 6 to week 12~~
- FPG >11.1 mmol/L (200 mg/dL) or HbA<sub>1c</sub> > 8.0% (64 mmol/mol) from week 12 to end of trial

*If any of the FPG values exceed the limits outlined below and no intercurrent cause of the hyperglycaemia can be identified the subject should be offered treatment intensification (rescue medication):*

- 15.0 mmol/L (270 mg/dL) from randomisation to end of Week 5
- 13.3 mmol/L (240 mg/dL) from Week 6 to end of Week 11
- 11.1 mmol/L (200 mg/dL) from Week 12 to end of trial

*A confirmatory FPG should be obtained by central laboratory if related to a scheduled visit or by local laboratory if not related to scheduled visits. If the confirmatory FPG exceeds the values described above the subject should be offered treatment intensification (rescue medication) at the discretion of the investigator and in accordance with ADA/European Association for the Study of Diabetes<sup>a</sup> (preferably excluding GLP-receptor agonists, DPP-4 inhibitors and amylin analogues). Rescue medication (intensification of existing background medication and/or initiation of new medication) and any changes to this should be captured on the concomitant medication form in the eCRF. Rescue medication should be prescribed as add-on to randomised treatment and subjects should continue to follow the protocol-specified visit schedule.*

## Reference a added see section 2.14

### 2.4 Section 8.4.7 Electrocardiogram – 12-lead

Sites will be informed of the central ECG evaluation in case this evaluation reveals an abnormal, *clinically significant* ECG reading. If the abnormality represents an unreported AE, SAE or MESI, such findings must be reported if the investigator finds the abnormality clinically significant (see Section 8.1.11).

### 2.5 Section 8.4.10 Pharmacokinetics

*For subjects on oral treatment, three of the PK sampling assessments will be pre-dose and post-dose (trough and peak) only* ~~Subjects on oral treatment will also have PK measured pre-dose and post-dose (trough and peak) at three visits~~ (see Section 2). At the visits for trough and peak PK measurements, the investigator needs to ensure that the subjects on oral treatment follow these procedures:

### 2.6 Section 12.1 Definitions

#### Medical event of special interest

A medical event of special interest (MESI) is an event which, in the evaluation of safety, has a special focus. A MESI is an AE (SAE or non-serious AE) which fulfils one or more of the below defined MESI criteria.

8. Thyroid Disease ~~((A) if thyroidectomy is required)~~ *((A) if thyroid neoplasm or resulting in thyroidectomy)*

### 2.7 Section 12.2 Reporting of adverse events

All events meeting the definition of an AE must be collected and reported. This includes events from *when the first trial-related activity after the subject has signed the informed consent until the end of the post-treatment follow-up period*. The events must be recorded in the applicable eCRF forms in a timely manner (see timelines below and Figure 12–1).

All AEs, either observed by the investigator or reported by the subject, must be reported by the investigator and evaluated. Novo Nordisk assessment of expectedness is performed according to the

following reference document: IB (Oral Administration of Semaglutide (NN9924)) *section 6.2.6.1 Reference safety information*, Edition 5<sup>6</sup> and any updates hereof.

## 2.8 Section 12.7.2 Event adjudication committee

- Thyroid Disease (~~if thyroidectomy is required~~ *if thyroid neoplasm or resulting in thyroidectomy*)

## 2.9 Section 17.1 Sample size calculation

A standard deviation (SD) of 1.2% for change from baseline in HbA1c is chosen as assumption for the sample size calculation. The SD observed in several phase 3 trials of 26 weeks duration with s.c. liraglutide suggests a standard deviation less than 1.1%. However, as it is uncertain if the added variation in exposure compared to s.c. ~~liraglutide~~ *semaglutide* will transfer to an added variation in the therapeutic response, a SD of 1.2% is assumed.

## 2.10 Section 17.2 Definition of analysis sets

**Safety Analysis Set (SAS):** includes all subjects exposed to at least one dose of randomised ~~liraglutide~~ *semaglutide* or ~~liraglutide~~ *semaglutide* placebo. Subjects in the SAS will contribute to the evaluation “as treated”.

## 2.11 Section 17.3 Primary endpoint

Due to the uncertainty in relation to if the added variation in the exposure in the oral semaglutide arms compared to s.c. ~~liraglutide~~ *semaglutide* will transfer to an added variation in the therapeutic response, a sensitivity analysis allowing the within subject unstructured covariance matrix to be fitted separately for each treatment arm will be conducted.

## 2.12 Section 17.4.2 Safety endpoints

### Confirmed hypoglycaemia

In normal physiology, symptoms of hypoglycaemia occur below a plasma glucose level of 3.1 mmol/L (56 mg/dL)<sup>13</sup>. Therefore, Novo Nordisk has included hypoglycaemia with plasma glucose levels below this cut-off point in the definition of confirmed hypoglycaemia.

Confirmed hypoglycaemic episodes are defined as episodes that are:

- severe (~~i.e., an episode requiring assistance of another person to actively administer carbohydrate, glucagon, or other resuscitative actions~~) *according to the ADA classification below and/or*
- biochemically confirmed by a plasma glucose value of <3.1 mmol/L (56 mg/dL), with or without symptoms consistent with hypoglycaemia

ADA classification<sup>b</sup> of hypoglycaemia

- Severe hypoglycaemia: An episode requiring assistance of another person to actively administer carbohydrate, glucagon, *or take other corrective actions.* ~~other resuscitative~~

**actions:** Plasma glucose concentrations may not be available during an event, but neurological recovery following the return of plasma glucose back to normal is considered sufficient evidence that the event was induced by a low plasma glucose concentration.

- Asymptomatic hypoglycaemia: An episode not accompanied by typical symptoms of hypoglycaemia, but with a measured plasma glucose concentration  $\leq 3.9$  mmol/L (70 mg/dL)
- Documented symptomatic hypoglycaemia: An episode during which typical symptoms of hypoglycaemia are accompanied by a measured plasma glucose concentration  $\leq 3.9$  mmol/L (70 mg/dL).
- ~~Relative~~ Pseudo-hypoglycaemia: An episode during which the person with diabetes reports any of the typical symptoms of hypoglycaemia, ~~and interprets those as indicative of hypoglycaemia,~~ but with a measured plasma glucose concentration  $> 3.9$  mmol/L (70 mg/dL) but approaching that level.
- Probable symptomatic hypoglycaemia: An episode during which symptoms of hypoglycaemia are not accompanied by a plasma glucose determination (but that was presumably caused by a plasma glucose concentration  $\leq 3.9$  mmol/L ( $\{70$  mg/dL $\}$ ).

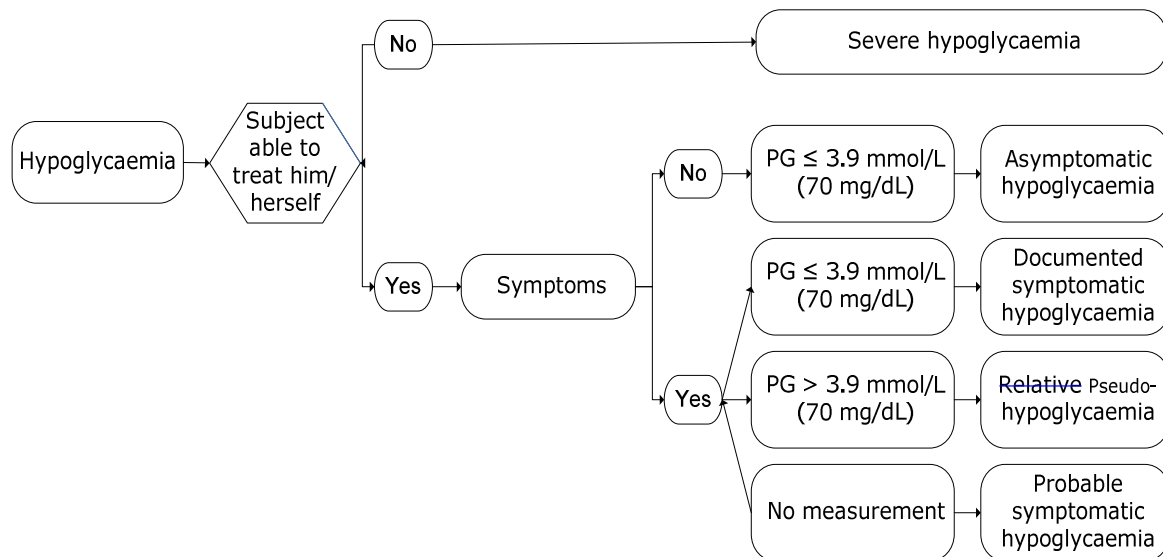

Figure 17–1 ADA classification of hypoglycaemia

Reference b added see section 2.14

## 2.13 Section 25 Institutional Review Boards/Independent Ethics Committees and regulatory authorities

IRB/IEC:

Written approval or favourable opinion must be obtained from IRB/IEC prior to commencement of the trial.

During the trial, the investigator or sponsor, as applicable, must promptly report the following to the IRB/IEC, in accordance with local requirements: updates to IB, unexpected SAEs where a causal relationship cannot be ruled out, ~~substantial protocol amendments, non-substantial protocol amendments~~ according to local requirements, deviations to the protocol implemented to eliminate immediate hazards to the subjects, new information that may affect adversely the safety of the subjects or the conduct of the trial (including new risk/benefit analysis in case it will have an impact on the planned follow-up of the subjects), annually written summaries of the trial status and other documents as required by the local IRB/IEC.

*The investigator must ensure submission of the clinical trial report synopsis to the IRB/IEC.*

## **2.14 Section 27 References**

2 World Medical Association. Declaration of Helsinki. Ethical Principles for Medical Research Involving Human Subjects. ~~59<sup>th</sup> WMA General Assembly, Seoul, 1 Oct 2008. Last amended by the~~ 64<sup>th</sup> WMA General Assembly, Fortaleza, Brazil, October 2013

*a Inzucchi SE, Bergenstal RM, Buse JB, Diamant M, Ferrannini E, Nauck M, et al. Management of hyperglycemia in type 2 diabetes: a patient-centered approach: position statement of the American Diabetes Association (ADA) and the European Association for the Study of Diabetes (EASD). Diabetes Care 2012 Jun;35(6):1364-79.*

*b Seaquist ER, Anderson J, Childs B, Cryer P, Dagogo-Jack S, Fish L et al: Hypoglycemia and Diabetes: A report of a Workgroup of the American Diabetes Association and The Endocrine Society. Diabetes Care 36: 1384-1395, 2013*

**Protocol Amendment**  
**no 3**  
**to Protocol, final version 1.0**  
**dated 25 June 2013**  
**including all amendments**

**Trial ID: NN9924-3790**

**Multiple dose trial examining dose range, escalation and  
efficacy of oral semaglutide in subjects with type 2 diabetes**

**Trial phase: 2**

**Applicable to Germany**

Amendment originator:

  
Clinical, Medical & Regulatory

This ~~confidential~~ document is the property of Novo Nordisk. ~~No unpublished information contained herein may be disclosed without prior written approval from Novo Nordisk. Access to this document must be restricted to relevant parties.~~

## Table of contents

|                                                                            | <i>Page</i> |
|----------------------------------------------------------------------------|-------------|
| <b>1 Introduction including rationale for the protocol amendment .....</b> | <b>3</b>    |
| <b>2 Changes .....</b>                                                     | <b>4</b>    |
| 2.1 Section 6.4 Rescue criteria.....                                       | 4           |



## 1 Introduction including rationale for the protocol amendment

According to the deficiency letter from BfArM (German National Health Authority) from 28-Feb-2014, the global substantial Amendment no 2 to Protocol, final version 1.0 dated 25 June 2013, final version 1.0, dated 16 January 2014 will be amended by this document for Germany.

The HbA1c criterion will be removed as part of the rescue criteria during the treatment period. It has been judged that there is a risk of having an inappropriately high proportion of the subjects requiring rescue due to high HbA1c levels during the trial. Hence it has been decided to only assess the need for rescue medication based on confirmed fasting plasma glucose levels. As described in the statistical section, subjects on rescue medication will not be included in the primary analysis (only data up to the point of rescue) meaning that a high number of subjects on rescue medication could potentially invalidate the data and trial results. The investigator can at any time during the trial decide to discontinue trial product and initiate other treatment if any safety issues are seen, consequently this change is not assessed to have any safety risks for the subjects.

*To ensure proper treatment respectively treatment intensification of subjects, the rescue FPG criteria will be lowered from 200 mg/dl to 180 mg/dl from week 12 and onwards.*

In this protocol amendment:

- Any new text is written *in italics*.
- Any text deleted from the protocol is written using ~~strike through~~.

## 2 Changes

### 2.1 Section 6.4 Rescue criteria

~~Subjects with unacceptable hyperglycaemia should be offered treatment intensification (rescue medication) according to local label at the discretion of the investigator as add-on to randomised treatment and should continue to follow the protocol specified visit schedule. Rescue medication should exclude other incretin-based therapies such as other GLP-1 receptor agonists, DPP-4 inhibitors and amylin analogues.~~

~~Unacceptable hyperglycaemia in this trial is defined as:~~

- ~~• FPG >15 mmol/L (270 mg/dL) from baseline to week 6~~
- ~~• FPG >13.3 mmol/L (240 mg/dL) from week 6 to week 12~~
- ~~• FPG >11.1 mmol/L (200 mg/dL) or HbA<sub>1c</sub> >8.0% (64 mmol/mol) from week 12 to end of trial~~

*If any of the FPG values exceed the limits outlined below and no intercurrent cause of the hyperglycaemia can be identified the subject should be offered treatment intensification (rescue medication):*

- 15.0 mmol/L (270 mg/dL) from randomisation to end of Week 5
- 13.3 mmol/L (240 mg/dL) from Week 6 to end of Week 11
- ~~11.1 mmol/L (200 mg/dL)~~ 10.0 mmol/L (180 mg/dL) from Week 12 to end of trial

*A confirmatory FPG should be obtained by central laboratory if related to a scheduled visit or by local laboratory if not related to scheduled visits. If the confirmatory FPG exceeds the values described above the subject should be offered treatment intensification (rescue medication) at the discretion of the investigator and in accordance with ADA/European Association for the Study of Diabetes<sup>a</sup> (preferably excluding GLP-receptor agonists, DPP-4 inhibitors and amylin analogues). Rescue medication (intensification of existing background medication and/or initiation of new medication) and any changes to this should be captured on the concomitant medication form in the eCRF. Rescue medication should be prescribed as add-on to randomised treatment and subjects should continue to follow the protocol-specified visit schedule.*

## Statistical Analysis Plan

**Trial ID: NN9924-3790**

**Multiple dose trial examining dose range, escalation and efficacy of oral semaglutide in subjects with type 2 diabetes**

**Author:**

Click here to enter text.

Click here to enter text.

This ~~confidential~~ document is the property of Novo Nordisk. No ~~unpublished information contained herein may be disclosed without prior written approval from Novo Nordisk. Access to this document must be restricted to relevant parties.~~

## Table of contents

|                                                                           | <b>Page</b> |
|---------------------------------------------------------------------------|-------------|
| <b>Table of contents.....</b>                                             | <b>2</b>    |
| <b>List of abbreviations.....</b>                                         | <b>4</b>    |
| <b>1 Introduction.....</b>                                                | <b>5</b>    |
| 1.1 Trial information.....                                                | 5           |
| 1.2 Scope of the statistical analysis plan.....                           | 5           |
| <b>2 Statistical considerations .....</b>                                 | <b>5</b>    |
| 2.1 Sample size calculation.....                                          | 6           |
| 2.2 Definition of analysis sets.....                                      | 6           |
| 2.3 Definition of baseline.....                                           | 6           |
| 2.4 Definition of observation periods .....                               | 6           |
| In-trial observation period.....                                          | 7           |
| On-treatment observation period .....                                     | 7           |
| On-treatment without rescue:.....                                         | 8           |
| 2.5 Imputation of missing observations.....                               | 8           |
| 2.6 Primary endpoint.....                                                 | 9           |
| 2.7 Supportive secondary endpoints .....                                  | 10          |
| 2.7.1 Efficacy endpoints .....                                            | 10          |
| 2.7.2 Safety endpoints.....                                               | 11          |
| 2.7.3 Pharmacokinetics and/or pharmacodynamics modelling.....             | 15          |
| 2.8 End of text outputs for subject disposition and demographics .....    | 16          |
| 2.9 End of text outputs for efficacy endpoints.....                       | 16          |
| 2.10 End of text outputs for safety endpoints .....                       | 18          |
| 2.11 Listings.....                                                        | 22          |
| <b>3 Changes to the statistical analyses planned in the protocol.....</b> | <b>22</b>   |
| <b>4 Pre-defined groups of adverse events .....</b>                       | <b>24</b>   |
| 4.1 Gastrointestinal adverse events.....                                  | 24          |
| 4.2 Allergic reactions.....                                               | 63          |
| 4.3 Antibody adverse events.....                                          | 72          |
| 4.4 Calcitonin adverse events .....                                       | 74          |
| 4.5 Cardiovascular adverse events.....                                    | 74          |
| 4.6 Gallbladder disease adverse events.....                               | 124         |
| 4.7 Immune complex adverse events .....                                   | 129         |
| 4.8 Injection site reactions .....                                        | 138         |
| 4.9 Elevated lipase and/or amylase adverse events.....                    | 152         |
| 4.10 Medication error adverse events .....                                | 153         |
| 4.11 Neoplasm adverse events.....                                         | 168         |
| 4.12 Overdose adverse events.....                                         | 343         |
| 4.13 Pancreatic carcinoma adverse events.....                             | 344         |
| 4.14 Pancreatitis adverse events .....                                    | 346         |
| 4.15 Thyroid adverse events .....                                         | 348         |
| 4.16 Transmission adverse events.....                                     | 356         |
| 4.17 Rare adverse events .....                                            | 358         |

|          |                                       |            |
|----------|---------------------------------------|------------|
| 4.18     | Renal failure adverse events .....    | 449        |
| 4.19     | Malignant tumour adverse events ..... | 452        |
| <b>5</b> | <b>References .....</b>               | <b>551</b> |

## List of abbreviations

|               |                                                     |
|---------------|-----------------------------------------------------|
| <i>AE</i>     | <i>Adverse event</i>                                |
| <i>ANCOVA</i> | <i>Analysis of covariance</i>                       |
| <i>BMI</i>    | <i>Body mass index</i>                              |
| <i>CI</i>     | <i>Confidence interval</i>                          |
| <i>CRF</i>    | <i>Case report form</i>                             |
| <i>CTR</i>    | <i>Clinical trial report</i>                        |
| <i>EoT</i>    | <i>End-of-text</i>                                  |
| <i>LOCF</i>   | <i>Last observation carried forward</i>             |
| <i>LLOQ</i>   | <i>Lower limit of quantification</i>                |
| <i>MedDRA</i> | <i>Medical Dictionary for Regulatory Activities</i> |
| <i>PD</i>     | <i>Pharmacodynamics</i>                             |
| <i>PK</i>     | <i>Pharmacokinetics</i>                             |
| <i>PP</i>     | <i>Per protocol</i>                                 |
| <i>SAE</i>    | <i>Serious adverse event</i>                        |
| <i>SAP</i>    | <i>Statistical analysis plan</i>                    |
| <i>SD</i>     | <i>Standard deviation</i>                           |
| <i>SE</i>     | <i>Standard error</i>                               |
| <i>TEAE</i>   | <i>Treatment emergent adverse event</i>             |
| <i>MMRM</i>   | <i>Mixed model for repeated measures</i>            |

## 1 Introduction

### 1.1 Trial information

This is a randomised, partially-blinded, multiple-dose, multicentre trial with a total of nine treatment arms; seven oral semaglutide treatment arms, one oral placebo arm and one open-label subcutaneous (s.c.) semaglutide arm in a parallel design. The trial will include subjects with T2D who have failed on diet and exercise and/or metformin.

The primary objective of the trial is to compare the efficacy on glycaemic control of oral semaglutide in a SNAC formulation against placebo in subjects with T2D.

### 1.2 Scope of the statistical analysis plan

This statistical analysis plan (SAP) is based on the protocol “3790-consolidated-protocol-file-protocol-version-3 0”, that is, the consolidated version 3 which includes protocol amendments one and two.

This SAP contains a more technical and detailed elaboration of the statistical analyses specified in the statistical section of the protocol. .

## 2 Statistical considerations

Results from the statistical analysis will generally be presented by two-sided confidence intervals with a confidence level of 95% including a p-value for test of no difference between treatments.

The stratification variable referred to in the following is defined as the two level factor of treatment with metformin (yes/no).

The “planned comparisons between treatment arms” referred to in this section covers the following comparisons: a) between each of the oral semaglutide treatment arms and placebo, b) between the s.c. semaglutide arm and placebo, c) between each of the oral semaglutide treatment arms and s.c. semaglutide, and d) between the three oral semaglutide treatment arms with an end dose of 40 mg.

A standard mixed model for repeated measurements (from now on referred to as “the standard MMRM”) will be used in the analysis of the primary and continuous secondary endpoints. The model will include treatment, country and the stratification variable as fixed factors, and the corresponding baseline value as covariate. All factors and the covariate will be nested within visit. The model will assume an unstructured covariance matrix within subject.

Unless otherwise stated, the estimated differences with corresponding two sided p-values and 95% confidence intervals at 26 weeks will be presented for the planned comparisons between treatment arms.

The patient years observation time (PYO) used in e.g. the calculation of AE rates will for an observation period be calculated as the difference between start-date and end-date, both inclusive.

Values of laboratory parameters below the lower limit of quantification (LLOQ) will be set to LLOQ/2.

The stratification variable “Treatment with metformin at screening (yes/no)” will be based on the actual information on concomitant medication recorded through the eCRF.

## 2.1 Sample size calculation

Please refer to section 17.1 of the protocol.

## 2.2 Definition of analysis sets

**Full Analysis Set (FAS):** includes all randomised subjects who have received at least one dose of randomised semaglutide (oral or s.c.) or semaglutide placebo. Subjects in the FAS will contribute to the evaluation based on their randomised treatment.

**Safety Analysis Set (SAS):** includes all randomised subjects who have received at least one dose of randomised semaglutide (oral or s.c.) or semaglutide placebo. Subjects in the SAS will contribute to the evaluation based on their actual treatment.

Before data are locked for statistical analysis, a review of all data will take place. Any decision to exclude a subject or single observations from the statistical analysis is the joint responsibility of the members of the study group. Exclusion of data from analyses will be used restrictively and normally no data should be excluded from the FAS. The subjects or observations to be excluded, and the reasons for their exclusion, must be documented and signed by those responsible before database lock. The subjects and observations excluded from analysis sets, and the reason for this, will be described in the clinical trial report (CTR).

## 2.3 Definition of baseline

For each lab parameter and each vital sign, the baseline assessment is defined as the last valid measurement at or before the randomisation visit (visit 2). This specifically implies that if a visit 2 assessment is missing (whether it's planned or not planned) then the screening assessment (from visit 1) will be used as the baseline assessment, if available.

## 2.4 Definition of observation periods

Unless subjects withdraw their informed consent, data collection will continue for the full duration of the trial.

The data for all tables, listings and figures developed for this trial will be selected in a two-step fashion.



In the first step, the population of subjects for the specific analysis is selected based on the specified analysis set (either the full analysis set or the safety analysis set).

In the second step, observations for the subjects in the analysis set are selected according to whether or not they belong to a specified observation period. Observations that do not belong to the specified observation period, will be treated as missing for the specific output.

In this trial, three observation periods will be defined, as described below. One observation period will be primary when selecting data related to efficacy and another will be primary when selecting data related to safety. The last observation period is considered supportive. Notice that for adjudicated events, onset date will be the EAC adjudicated onset date.

The three observation periods are:

### **In-trial observation period**

*In-trial:* This observation period represents the time period in which a subject is considered a participant and where data are collected systematically. This observation period will be used for supportive analyses of both efficacy and safety. The in-trial observation period includes observations recorded at or after randomisation and not after the last subject-investigator contact, which is scheduled to take place 5 weeks after planned last dose of trial treatment at a follow-up visit (visit 12).

For subjects that prematurely discontinue treatment, their in-trial observation period will end with visit 11X if this comes after their follow-up visit.

For subjects that withdraw their informed consent and do not attend visit 11, nor visit 12, their in-trial observation period ends at their date of withdrawal.

If a subject is lost to follow-up, the end of the in-trial observation period is defined as the date of the last subject-investigator contact (site or phone visit).

### **On-treatment observation period**

*On-treatment:* This observation period is a subset of the in-trial observation period, namely the part where the subject is considered to be exposed to trial treatment.

For adverse events and hypoglycaemic episodes, this period includes those observations from the in-trial observation period that are recorded on or after the date of first dose of trial treatment and not after the end of the 5 week washout period that follows the date of last dose of trial treatment. The follow-up visit is scheduled to take place 5 weeks after the date of last dose of trial product with a visit window of +5 days. For adverse events and hypoglycaemic episodes, the end-date for

the on-treatment observation period is therefore defined as the first date encountered after randomisation of the following dates [date of visit 12, date of last dose + 40 days, end-date for the in-trial observation period], using the convention that a missing date is set to infinity.

For other endpoints than adverse events and hypoglycaemic episodes, including both safety and efficacy, but with the exception of anti-semaglutide antibodies, the end-date for the on-treatment observation period will be defined as [date of visit 12, date of last dose + 7 days, end-date for the in-trial observation period], that is, similarly to above, but adding the s.c. dosing interval of 1 week to the date of last dose instead of 40 days. The on-treatment observation period will not be used to analyse anti-semaglutide antibodies.

The on-treatment observation period is the primary observation period for examination of safety endpoints including adverse events and hypoglycaemic episodes.

The definition of the on-treatment period for adverse events and hypoglycaemic episodes corresponds to the protocol definition of the treatment emergent period.

### **On-treatment without rescue:**

*On-treatment without rescue:* This observation period is a subset of the on-treatment observation period. To avoid potential confounding of initiation of anti-diabetic rescue therapies on efficacy endpoints, information that is collected after initiation of anti-diabetic rescue therapies are excluded from this observation period. Specifically, it includes observations recorded at or after date of first dose of trial treatment and not after the first occurrence of the following

- the end-date of the on-treatment observation period
- initiation of rescue medication

This observation period is the primary observation period for examination of efficacy endpoints.

We will use the convention that all baseline assessments belong to each of the observation periods.

## **2.5 Imputation of missing observations**

Missing observations for laboratory parameters and vital signs will be imputed with two methods: last observation carried forward (LOCF), where missing observations are imputed as the last post-baseline available value obtained prior to the missing assessment, and by prediction from the standard MMRM for the specific endpoint, where missing observations are imputed as the value that is predicted by the MMRM model. The MMRM imputations will be based on the randomised treatment and carried out for those endpoints where the standard MMRM analysis is part of the examination.

For subjects that have no post-baseline assessment of a given endpoint, no imputation will be done for this endpoint.

Note that the LOCF and MMRM imputations depend on the considered observation period, and separate imputation for the three observation periods will be carried out.

## 2.6 Primary endpoint

The primary endpoint, change from baseline to end of treatment (i.e., after 26 weeks of treatment) in HbA1c, will be analysed by the standard MMRM.

In order to confirm efficacy of oral semaglutide without risk of inflation of the type 1 error an initial comparison of the primary endpoint will be made between a) the pool of the two treatment arms using standard and fast escalation regimens to an end dose of 40 mg and b) placebo. The comparison will be made by pooling the standard 40 mg arm and the fast 40 mg arm and then estimating the treatment difference between this pooled group and the placebo group by the standard MMRM. The estimated treatment difference with corresponding two sided p-value and 95% confidence interval at 26 weeks will be presented, and efficacy of oral semaglutide will be considered confirmed if the upper limit of the confidence interval is strictly less than zero.

If efficacy of oral semaglutide is confirmed, the planned comparisons between the nine original treatment arms will be evaluated.

Subjects in the FAS and only measurements belonging to the on-treatment without rescue observation period will be included in the analysis.

Due to the uncertainty in relation to if the added variation in the exposure in the oral semaglutide arms compared to s.c. semaglutide will transfer to an added variation in the therapeutic response, a sensitivity analysis allowing the within subject unstructured covariance matrix to be fitted separately for each treatment arm will be conducted.

Furthermore, the following sensitivity analyses will be conducted in order to investigate the sensitivity of the results due to the impact of missing values:

- An MMRM similar to the primary analysis but for the in-trial observation period.
- An analysis of covariance (ANCOVA) model including subjects in the FAS and using imputation of missing values according to the last observation carried forward (LOCF) method. The model will include fixed factors for treatment, country and the stratification variable and the baseline value as covariate and will be based on the on-treatment period.
- A complete case analysis, i.e. an ANCOVA similar to the one above including only data obtained at 26 weeks from subjects who:
  - did not discontinue treatment prematurely

- did not receive rescue therapy
- had a valid HbA1c assessment at baseline and after 26 weeks of treatment

## 2.7 Supportive secondary endpoints

### 2.7.1 Efficacy endpoints

The FAS will be used in all analyses of the supportive secondary efficacy endpoints. The on-treatment without rescue observation period will be the primary observation period for examination of efficacy endpoints. The specific outputs developed for efficacy endpoints will be detailed in section 2.7.3.

#### **Subjects who, after 26 weeks of treatment, achieve (yes/no) HbA1c <7% (53 mmol/mol)**

The binary endpoint will be analysed by a logistic regression model which will include fixed factors for treatment and the stratification variable and baseline HbA1c as a covariate. Estimated odds ratios with corresponding two sided p-values and 95% confidence intervals at 26 weeks will be presented for the planned comparisons between treatment arms. Missing response data at 26 weeks will be imputed from the MMRM used for the primary analysis of HbA1c.

#### **Change from baseline to week 26 in body weight, waist circumference and fasting plasma glucose**

These endpoints will be analysed by the standard MMRM. Both absolute (kg) and relative change from baseline (%) in body weight will be analysed.

#### **Subjects with at least 5 % weight loss after 26 weeks of treatment (yes/no) and subjects with more than 10 % weight loss added after 26 weeks of treatment (yes/no)**

These binary endpoints will be analysed by separate logistic regression models which will include fixed factors for treatment and the stratification variable and baseline body weight as a covariate. Estimated odds ratios with corresponding two sided p-values and 95% confidence intervals at 26 weeks will be presented for the planned comparisons between treatment arms. Missing response data at 26 weeks will be imputed from the MMRM used for the analysis of body weight.

#### **Change from baseline to week 26 in C-peptide, fasting insulin, glucagon, HOMA-IR, HOMA-B, total cholesterol, LDL-cholesterol, HDL-cholesterol, VLDL-cholesterol, triglycerides and free fatty acids**

For each endpoint, the assessments at every week will be log-transformed and subsequently analysed by the standard MMRM. The estimated differences and corresponding 95% confidence intervals at 26 weeks will be back transformed and presented as ratios together with the two sided

p-values. Standard errors of the back transformed estimated means will be calculated using the Delta-method<sup>1</sup>.

The fasting HOMA endpoints (i.e., fasting HOMA-B and HOMA-IR) will be calculated based on fasting insulin and FPG as follows:

1. Fasting HOMA-B (%) =  $20 \times \text{fasting insulin } [\mu\text{U/ml}] / (\text{FPG}[\text{mmol/L}] - 3.5)$

2. Fasting HOMA-IR (%) =  $\text{fasting insulin } [\mu\text{U/ml}] \times \text{FPG } [\text{mmol/L}] / 22.5$

### **PRO outcomes**

The outcomes from the SF-36 questionnaire in terms of total scores overall and within each domain will be calculated. Each of these scores will be analysed by the standard MMRM.

#### **2.7.2 Safety endpoints**

All safety endpoints will be summarised and analysed using the safety analysis set. The on-treatment observation period will be the primary observation period for examination of all safety endpoints.

#### **Adverse events**

All AEs will be coded using the most recent version of the Medical Dictionary for regulatory Activities (MedDRA) coding. This is version 17.1. A TEAE is an event that has onset date (or increase in severity) during the on-treatment observation period. On-treatment AEs are summarised descriptively. These are supported by outputs including all in-trial adverse events, i.e. AEs with onset date (or increase in severity) during the in-trial observation period. Adverse events with onset after the end of the in-trial observation period will be reported in a listing.

Most frequent adverse events will be defined as preferred terms that are experienced by at least 5% of the subjects in any of the treatment arms.

Based on MedDRA searches, 19 pre-defined groups of adverse events will be evaluated. These are defined by Global Safety and consist of pre-specified preferred terms. The groups are the following:

- Gastrointestinal adverse events
- Allergic reactions
- Antibody adverse events
- Calcitonin adverse events
- Cardiovascular adverse events
- Gallbladder disease adverse events
- Immune complex adverse events
- Injection site reactions

- Elevated lipase and/or amylase adverse events
- Medication error adverse events
- Neoplasm adverse events
- Overdose adverse events
- Pancreatic carcinoma adverse events
- Pancreatitis adverse events
- Thyroid adverse events
- Transmission adverse events
- Rare adverse events
- Renal failure adverse events
- Malignant tumour adverse events

The definition of rare adverse events is based on a publication by Shakir from 2005 (Pharmacoepidemiology, Fourth Edition), called "Prescription-Event Monitoring". For complete listings of preferred terms included in the pre-defined groups of adverse events see section 4.

### **Number of confirmed treatment emergent hypoglycaemic episodes**

A hypoglycaemic episode will be defined as treatment emergent if the onset of the episode occurs during the on-treatment period. Hypoglycaemic episodes are classified according to the Novo Nordisk classification of confirmed hypoglycaemia and the ADA classification of hypoglycaemia (see Figure 1: ADA classification of hypoglycaemia).

### **Confirmed hypoglycaemia**

In normal physiology, symptoms of hypoglycaemia occur below a plasma glucose level of 3.1 mmol/L (56 mg/dL)<sup>ii</sup>. Therefore, Novo Nordisk has included hypoglycaemia with plasma glucose levels below this cut-off point in the definition of confirmed hypoglycaemia.

Confirmed hypoglycaemic episodes are defined as episodes that are:

- severe according to the ADA classification below and/or
- biochemically confirmed by a plasma glucose value of <3.1 mmol/L (56 mg/dL), with or without symptoms consistent with hypoglycaemia

### **Severe or BG confirmed symptomatic hypoglycaemia**

- severe according to the ADA classification below and/or
- biochemically confirmed by a plasma glucose value of <3.1 mmol/L (56 mg/dL), with symptoms consistent with hypoglycaemia

### **ADA classification<sup>iii</sup> of hypoglycaemia**

- **Severe hypoglycaemia:** An episode requiring assistance of another person to actively administer carbohydrate, glucagon, or take other corrective actions. Plasma glucose concentrations may not be available during an event, but neurological recovery following the return of plasma glucose back to normal is considered sufficient evidence that the event was induced by a low plasma glucose concentration.
- **Asymptomatic hypoglycaemia:** An episode not accompanied by typical symptoms of hypoglycaemia, but with a measured plasma glucose concentration  $\leq 3.9$  mmol/L (70 mg/dL)
- **Documented symptomatic hypoglycaemia:** An episode during which typical symptoms of hypoglycaemia are accompanied by a measured plasma glucose concentration  $\leq 3.9$  mmol/L (70 mg/dL).
- **Pseudo-hypoglycaemia:** An episode during which the person with diabetes reports any of the typical symptoms of hypoglycaemia with a measured plasma glucose concentration  $> 3.9$  mmol/L (70 mg/dL) but approaching that level.
- **Probable symptomatic hypoglycaemia:** An episode during which symptoms of hypoglycaemia are not accompanied by a plasma glucose determination (but that was presumably caused by a plasma glucose concentration  $\leq 3.9$  mmol/L (70 mg/dL).

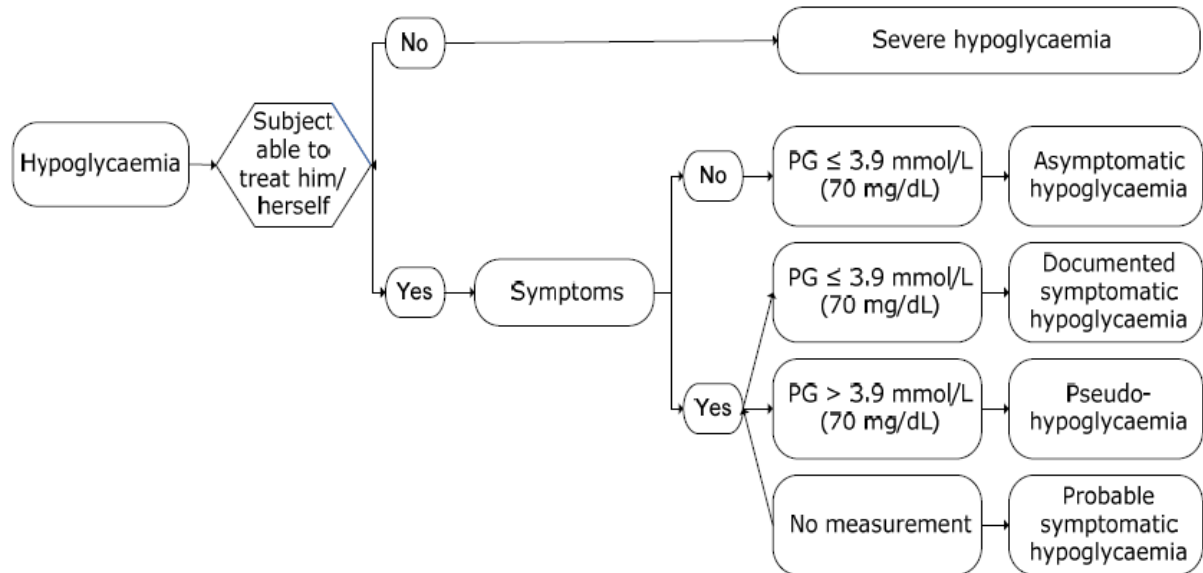

**Figure 1: ADA classification of hypoglycaemia**

Data on treatment emergent hypoglycaemic episodes will be summarised descriptively using the above definitions.

The number of confirmed treatment emergent hypoglycaemic episodes during 26 weeks treatment will be analysed using a negative binomial regression model with a log-link function and the logarithm of the time period in which an occurrence of a hypoglycaemic episode is considered treatment emergent as offset. The model will include treatment, country and stratification variable as fixed factors and baseline HbA1c as covariate. Estimated rate ratios with corresponding two sided p-values and 95% confidence intervals at 26 weeks will be presented for the planned comparisons between treatment arms.

The number of subjects experiencing one or more confirmed treatment emergent hypoglycaemic episode will be analysed using a logistic regression model with fixed factors for treatment and the stratification variable and baseline HbA1c as a covariate. Estimated odds ratios with corresponding two sided p-values and 95% confidence intervals at 26 weeks will be presented for the planned comparisons between treatment arms.

Similar analyses for severe or BG confirmed symptomatic hypoglycaemic episodes will be conducted.

**Change in pulse, systolic- and diastolic blood pressure from baseline to after 26 weeks of treatment**



These endpoints will be analysed by the standard MMRM.

### **Change in amylase and lipase from baseline to after 26 weeks of treatment**

For each endpoint, the assessments at every week will be log-transformed and subsequently analysed by the standard MMRM. The estimated differences and corresponding 95% confidence intervals at 26 weeks will be back transformed and presented as ratios together with the two sided p-values. Standard errors of the means will be calculated using the Delta-method.

### **Change from baseline to after 26 weeks of treatment in electrocardiogram (ECG), physical examination, laboratory safety variables (haematology, biochemistry, hormone and urinalysis) other than amylase and lipase**

These endpoints will be summarised by descriptive statistics.

### **Endpoints related to occurrence of anti-semaglutide antibodies during 26 weeks of treatment: Antibody level during 26 weeks of treatment, anti-semaglutide antibodies (positive/negative), antisemaglutide antibodies with in vitro neutralising effect (positive/negative), antisemaglutide antibodies cross reacting with endogenous GLP-1 (positive/negative), cross reacting antibodies with in vitro neutralising effect to endogenous GLP-1 (positive/negative)**

These endpoints will be summarised by descriptive statistics and correlated to PK and PD. Categorical summary tables for the occurrence of antibodies by treatment week as well as for occurrence of antibodies versus mean HbA1c and versus mean trough PK value will be produced. In addition, scatter plots of antibody level (%B/T) vs. HbA1c and vs. trough PK value will be developed.

### **2.7.3 Pharmacokinetics and/or pharmacodynamics modelling**

The modelling will be performed by Quantitative Clinical Pharmacology at Novo Nordisk A/S and will be reported separately from the CTR.

## 2.8 End of text outputs for subject disposition and demographics

To describe the trial population, descriptive tables for the disposition of subjects amongst the two analysis sets and treatment/trial completion statuses will be developed.

The time from randomisation to withdrawal, premature treatment discontinuation and initiation of rescue medication, and the duration of the three observation periods will be examined with descriptive figures.

Baseline characteristics for continuous and categorical variables will be summarised in descriptive tables.

Descriptive tables for general medical history, history of cardiovascular and gall bladder disease and concomitant medication will be developed.

## 2.9 End of text outputs for efficacy endpoints

As mentioned above, the primary observation period used for examination of efficacy endpoints will be the on-treatment without rescue observation period. For safety endpoints the primary observation period will be the on-treatment observation period. Outputs will be based on data in SI units, and where applicable they will be repeated for conventional units. This will among other endpoints apply to HbA1c, where data is collected in both “%” and “mmol/mol”. The analysis of HbA1c in “%” is considered primary.

The specific outputs developed for the different endpoints are detailed here below.

### Continuous efficacy endpoints

For continuous efficacy endpoints the end of text outputs will constitute of:

- Tables with descriptive statistics for observed values as well as change from baseline
- Tables with results of statistical analyses including estimated means (LS means) for week 26 values as well as for change from baseline to week 26, and in addition estimated treatment differences/ratios for the planned comparisons of treatment arms
- Panel plots with mean of observed as well as change from baseline values over time grouped by the time of last observation. There will be a panel for each treatment arm in these plots and they serve to illustrate the observed means over time for different time-patterns of missing data.
- Plots with estimated mean values over time. These plots present the estimated means from the statistical analyses.
- Bar plots with estimated means at week 26 from the statistical analyses.

- Forest plots with the estimated treatment differences/ratios from the statistical analyses for the planned comparisons, where deemed relevant
- Cumulative distribution functions presenting the distribution of the endpoints at week 26, including MMRM imputed values

### **Categorical efficacy endpoints**

For HbA1c and body weight, binary responder endpoints have been defined. The outputs for assessment of these include:

- Categorical summary tables with counts and percentages of the response categories.
- Tables with results of statistical analyses including estimated odds at week 26 values as well as odds ratios for the planned comparisons of treatment arms
- Bar plots with observed proportions of subjects achieving the responses
- Forest plots with estimated odds ratios at week 26 based on the statistical analyses

## 2.10 End of text outputs for safety endpoints

### Adverse events

Adverse events will be evaluated with

- Overview tables that summarise the events across treatment arms in relation to seriousness, severity, relationship to trial product, outcome and whether they led to premature treatment discontinuation
  - o These will be developed for all adverse events and serious adverse events based on both the on-treatment and the in-trial observation period. For most frequent adverse events, adverse events leading to premature treatment discontinuation and pre-defined MedDRA searches they will be developed for the on-treatment observation period.
- Summary tables describing the distribution of adverse events across treatment arms by system organ classes and preferred terms
  - o These will be developed for all adverse events, serious adverse events, adverse events with fatal outcome and pre-defined MedDRA searches based on both the on-treatment and the in-trial observation period. For adverse events leading to premature treatment discontinuation and adverse events by severity they will be developed for the on-treatment observation period alone.
- Figures presenting the time to first event as well as the average number of events over time
  - o These will be developed based on the on-treatment observation period for all adverse events, serious adverse events, most frequent adverse events and pre-defined MedDRA searches.
- Plots summarising the incidence by preferred term
  - o These will be developed for most frequent adverse events, adverse events leading to premature treatment discontinuation and pre-defined MedDRA searches.
- Plots of the incidence over time by treatment and incidence over time by severity.
  - o These will be developed for all gastro-intestinal adverse events, nausea, vomiting and diarrhoea. These plots will both serve for comparison between treatment arms of incidences over time as well as assessment of the distribution over time of the severity of the adverse events.

### Number of confirmed treatment emergent hypoglycaemic episodes

Hypoglycaemic episodes will be summarized based on ADA-classification and the combined categories “Confirmed” and “Severe or BG confirmed symptomatic hypoglycaemia”.

The number of events and the number subjects experiencing an event will be evaluated for the two combined categories using statistical analyses as described above and using plots for time to first episode and average number of episodes over time.

### **Continuous safety lab parameters**

Safety lab parameters that are treated as continuous variables will be reported in groups defined below. Except for eosinophils and basophils, all examinations of continuous safety lab parameters will be done on logarithmic scale. Where applicable, outputs will be repeated for conventional units.

1. Pancreatic enzymes and hepatic laboratory parameters
  - a. Lipase
  - b. Amylase
  - c. Bilirubin, total
  - d. Aspartate aminotransferase (AST)
  - e. Alanine aminotransferase (ALT)
  - f. Alkaline phosphatase
2. Renal laboratory parameters
  - a. Creatinine
  - b. Urea
  - c. Urinary albumin/creatinine ratio
3. Electrolytes
  - a. Potassium
  - b. Sodium
  - c. Calcium (total)

- d. Calcium, albumin corrected (calcium, ionized)
4. Hormones
    - a. Calcitonin
  5. Other
    - a. Creatinine kinase
    - b. Albumin
  6. Haematology
    - a. Haemoglobin
    - b. Haematocrit
    - c. Erythrocytes
    - d. Thrombocytes
    - e. Leucocytes
    - f. Differential count (eosinophils, neutrophils, basophils, lymphocytes and monocytes)
  7. Urinalysis:
    - a. Albumin, urine

Descriptive outputs for these will be similar to those produced for continuous efficacy endpoints but based on the on-treatment observation period. The descriptive outputs are:

- Tables with descriptive statistics for observed values as well as change from baseline and ratio to baseline
- Categorical summary tables and shift tables for assessments outside of normal ranges.
- Tables with descriptive tables of the maximum post-baseline value
- Panel plots with mean of observed as well as change from baseline values over time grouped by the time of last observation. There will be a panel for each treatment arm in these plots and the serve to illustrate the observed means over time for different time-patterns of missing data.

- Cumulative distribution functions presenting the distribution of the maximum value observed post-baseline.

Amylase and lipase will in addition to descriptive examinations also be subject to statistical analyses. These will be done on log-scale and reported with the following statistical outputs:

- Tables with results of statistical analyses including estimated means (LS means) for week 26 values as well as for the ratio to baseline at week 26, and in addition estimated treatment ratios for the planned comparisons of treatment arms
- Plots with estimated mean values over time. These plots present the estimated means from the statistical analyses.

### **Categorical safety lab parameters**

Pregnancy test based on hCG serum assessments and results of the urinalysis will be evaluated as categorical parameters. For pregnancy test, a categorical summary table by treatment week will be produced. The parameters included in the urinalysis are:

- a. Blood (erythrocytes)
- b. Protein
- c. Glucose
- d. ketones
- e. pH

For these parameters, categorical summary tables and shift tables will be produced.

### **Vital signs**

Pulse, diastolic blood pressure and systolic blood pressure will be evaluated with outputs similar to the continuous safety lab parameters but on observed scale. The evaluation will be based on the on-treatment observation period.

Electrocardiograms (ECGs) will be evaluated based on the on-treatment observation period with categorical summary tables and shift tables by treatment week based on the investigator's assessment.

Physical examination will be evaluated similarly to ECG. For eye examination a categorical summary table of the baseline assessment will be developed.

## **2.11 Listings**

### **Subject disposition and demographics**

Continuous and categorical subject characteristics will be listed. Separate listings for medical history, concomitant illnesses, concomitant medication and diabetes medication will be prepared.

### **Efficacy endpoints**

Listings with individual response data will be produced for HbA1c, body weight, waist circumference, BMI, fasting plasma glucose, Fasting C-peptide, fasting insulin, glucagon and lipids.

In addition, a listing with data points excluded from the efficacy analyses will be prepared.

### **Safety endpoints**

Listings based on the on-treatment period for serious adverse events, adverse events with fatal outcome, adverse events leading to premature treatment discontinuation and adverse events leading to dose reduction.

These will be supplemented by a listing of adverse events occurring before randomisation, a listing of all adverse events during the in-trial observation period as well as a listing for those occurring after the end of the in-trial observation period.

Finally adverse events related to a technical complaint will be listed.

Separate listings for all hypoglycaemic episodes and severe hypoglycaemic episodes will be prepared.

Listings with observations outside the reference ranges will be produced for continuous safety lab parameters.

For amylase, lipase and calcitonin, listings with individual response data will be produced.

Listings for vital signs, overall ECG interpretation and anti-semaglutide antibodies will also be developed.

## **3 Changes to the statistical analyses planned in the protocol**

The definition of the FAS is changed to exclude the requirement that a subject must have post-baseline data. Effectively, the FAS and the SAS will be identical, but subjects will contribute to the evaluations differently (“as randomised” as opposed to “as treated”).

A clear definition of baseline has been added, and imputations of missing data have been clarified.



It has been clarified that the analysis to confirm efficacy of oral semaglutide will be based on a comparison of the pool of two treatment arms (40 mg standard and 40 mg fast) to placebo using the standard MMRM model.

The exploratory analysis to describe the dose-response relation of oral semaglutide and estimate the relative potency vs. s.c. semaglutide with regards to selected key endpoints, will be conducted by Quantitative Clinical Pharmacology.

Statistical analysis of the number of subjects experiencing a confirmed hypoglycaemic episode during the on-treatment observation period is added to the planned analyses. In addition, severe or BG confirmed symptomatic hypoglycaemic episodes will be analysed in the same way as confirmed hypoglycaemic episodes.

Analyses of relative change from baseline in body weight, of subjects with at least 5 % weight loss and of subjects with more than 10 % weight loss added after 26 weeks of treatment added in order to align with other projects.

Evaluations of severe or BG confirmed symptomatic hypoglycaemia have been added to the planned investigations.

Due to sparse data, country will not be included in the negative binomial model for hypoglycaemic episodes.

Treatment emergent adverse events and hypoglycaemic episodes are referred to as on-treatment adverse event / on-treatment hypoglycaemic episodes.

It has been clarified that the stratification variable “Treatment with metformin at screening (yes/no)” will be based on the actual information on concomitant medication recorded through the eCRF.

It has been clarified that values of laboratory parameters below the lower limit of quantification (LLOQ) will be set to LLOQ/2.

The evaluations of the pre-defined groups of adverse events have been added to the overview of planned investigations.

## 4 Pre-defined groups of adverse events

### 4.1 Gastrointestinal adverse events

| Preferred term       | High level term                                              | High level group term                     | System organ class         |
|----------------------|--------------------------------------------------------------|-------------------------------------------|----------------------------|
| Abdominal adhesions  | Peritoneal and retroperitoneal fibrosis and adhesions        | Peritoneal and retroperitoneal conditions | Gastrointestinal disorders |
| Abdominal discomfort | Gastrointestinal signs and symptoms NEC                      | Gastrointestinal signs and symptoms       | Gastrointestinal disorders |
| Abdominal distension | Flatulence, bloating and distension                          | Gastrointestinal signs and symptoms       | Gastrointestinal disorders |
| Abdominal mass       | Abdominal findings abnormal                                  | Gastrointestinal signs and symptoms       | Gastrointestinal disorders |
| Abdominal pain       | Gastrointestinal and abdominal pains (excl oral and throat)  | Gastrointestinal signs and symptoms       | Gastrointestinal disorders |
| Abdominal pain lower | Gastrointestinal and abdominal pains (excl oral and throat)  | Gastrointestinal signs and symptoms       | Gastrointestinal disorders |
| Abdominal pain upper | Gastrointestinal and abdominal pains (excl oral and throat)  | Gastrointestinal signs and symptoms       | Gastrointestinal disorders |
| Abdominal rigidity   | Gastrointestinal and abdominal pains (excl oral and throat)  | Gastrointestinal signs and symptoms       | Gastrointestinal disorders |
| Abdominal tenderness | Gastrointestinal and abdominal pains (excl oral and throat)  | Gastrointestinal signs and symptoms       | Gastrointestinal disorders |
| Abnormal faeces      | Faecal abnormalities NEC                                     | Gastrointestinal signs and symptoms       | Gastrointestinal disorders |
| Achlorhydria         | Gastrointestinal mucosal dystrophies and secretion disorders | Gastrointestinal conditions NEC           | Gastrointestinal disorders |
| Acute abdomen        | Gastrointestinal signs and symptoms NEC                      | Gastrointestinal signs and symptoms       | Gastrointestinal disorders |
| Amalgam tattoo       | Gingival disorders NEC                                       | Dental and gingival conditions            | Gastrointestinal disorders |
| Anal dilatation      | Anal and rectal disorders NEC                                | Anal and rectal conditions NEC            | Gastrointestinal disorders |
| Anal fissure         | Anal and rectal disorders NEC                                | Anal and rectal conditions NEC            | Gastrointestinal disorders |
| Anal fistula         | Gastrointestinal fistulae                                    | Gastrointestinal conditions NEC           | Gastrointestinal disorders |
| Anal leukoplakia     | Anal and rectal disorders NEC                                | Anal and rectal conditions NEC            | Gastrointestinal disorders |

|                                |                                                              |                                                      |                            |
|--------------------------------|--------------------------------------------------------------|------------------------------------------------------|----------------------------|
| Anal polyp                     | Benign neoplasms gastrointestinal (excl oral cavity)         | Benign neoplasms gastrointestinal                    | Gastrointestinal disorders |
| Anal skin tags                 | Anal and rectal disorders NEC                                | Anal and rectal conditions NEC                       | Gastrointestinal disorders |
| Anal spasm                     | Anal and rectal signs and symptoms                           | Anal and rectal conditions NEC                       | Gastrointestinal disorders |
| Anal stenosis                  | Anal and rectal stenosis and obstruction                     | Gastrointestinal stenosis and obstruction            | Gastrointestinal disorders |
| Anal ulcer                     | Anal and rectal ulcers and perforation                       | Gastrointestinal ulceration and perforation          | Gastrointestinal disorders |
| Anastomotic ulcer perforation  | Gastrointestinal ulcers and perforation, site unspecified    | Gastrointestinal ulceration and perforation          | Gastrointestinal disorders |
| Anastomotic ulcer, obstructive | Gastrointestinal ulcers and perforation, site unspecified    | Gastrointestinal ulceration and perforation          | Gastrointestinal disorders |
| Anorectal stenosis             | Anal and rectal stenosis and obstruction                     | Gastrointestinal stenosis and obstruction            | Gastrointestinal disorders |
| Anorectal ulcer                | Anal and rectal ulcers and perforation                       | Gastrointestinal ulceration and perforation          | Gastrointestinal disorders |
| Anorectal disorder             | Anal and rectal disorders NEC                                | Anal and rectal conditions NEC                       | Gastrointestinal disorders |
| Aphthous stomatitis            | Stomatitis and ulceration                                    | Oral soft tissue conditions                          | Gastrointestinal disorders |
| Aptyalism                      | Oral dryness and saliva altered                              | Salivary gland conditions                            | Gastrointestinal disorders |
| Ascites                        | Peritoneal and retroperitoneal disorders                     | Peritoneal and retroperitoneal conditions            | Gastrointestinal disorders |
| Barrett's oesophagus           | Gastrointestinal mucosal dystrophies and secretion disorders | Gastrointestinal conditions NEC                      | Gastrointestinal disorders |
| Bezoar                         | Gastrointestinal disorders NEC                               | Gastrointestinal conditions NEC                      | Gastrointestinal disorders |
| Breath odour                   | Gastrointestinal signs and symptoms NEC                      | Gastrointestinal signs and symptoms                  | Gastrointestinal disorders |
| Buccoglossal syndrome          | Tongue signs and symptoms                                    | Tongue conditions                                    | Gastrointestinal disorders |
| Cardiospasm                    | Gastrointestinal spastic and hypermotility disorders         | Gastrointestinal motility and defaecation conditions | Gastrointestinal disorders |
| Change of bowel habit          | Gastrointestinal dyskinetic disorders                        | Gastrointestinal motility and defaecation conditions | Gastrointestinal disorders |
| Cheilitis                      | Oral soft tissue disorders NEC                               | Oral soft tissue conditions                          | Gastrointestinal disorders |

|                                     |                                                        |                                                       |                            |
|-------------------------------------|--------------------------------------------------------|-------------------------------------------------------|----------------------------|
| Cheilosis                           | Oral soft tissue disorders NEC                         | Oral soft tissue conditions                           | Gastrointestinal disorders |
| Coeliac artery compression syndrome | Gastrointestinal vascular occlusion and infarction     | Gastrointestinal vascular conditions                  | Gastrointestinal disorders |
| Coeliac disease                     | Malabsorption syndromes                                | Malabsorption conditions                              | Gastrointestinal disorders |
| Colitis                             | Colitis (excl infective)                               | Gastrointestinal inflammatory conditions              | Gastrointestinal disorders |
| Colitis ischaemic                   | Colitis (excl infective)                               | Gastrointestinal inflammatory conditions              | Gastrointestinal disorders |
| Colitis ulcerative                  | Colitis (excl infective)                               | Gastrointestinal inflammatory conditions              | Gastrointestinal disorders |
| Colonic fistula                     | Gastrointestinal fistulae                              | Gastrointestinal conditions NEC                       | Gastrointestinal disorders |
| Colonic haematoma                   | Intestinal haemorrhages                                | Gastrointestinal haemorrhages NEC                     | Gastrointestinal disorders |
| Constipation                        | Gastrointestinal atonic and hypomotility disorders NEC | Gastrointestinal motility and defaecation conditions  | Gastrointestinal disorders |
| Crohn's disease                     | Colitis (excl infective)                               | Gastrointestinal inflammatory conditions              | Gastrointestinal disorders |
| Defaecation urgency                 | Gastrointestinal spastic and hypermotility disorders   | Gastrointestinal motility and defaecation conditions  | Gastrointestinal disorders |
| Dental alveolar anomaly             | Dental disorders NEC                                   | Dental and gingival conditions                        | Gastrointestinal disorders |
| Dental caries                       | Dental and periodontal infections and inflammations    | Dental and gingival conditions                        | Gastrointestinal disorders |
| Dental necrosis                     | Dental disorders NEC                                   | Dental and gingival conditions                        | Gastrointestinal disorders |
| Dental pulp disorder                | Dental pulp disorders                                  | Dental and gingival conditions                        | Gastrointestinal disorders |
| Diabetic gastropathy                | Gastrointestinal disorders NEC                         | Gastrointestinal conditions NEC                       | Gastrointestinal disorders |
| Diaphragmatic hernia                | Diaphragmatic hernias                                  | Abdominal hernias and other abdominal wall conditions | Gastrointestinal disorders |
| Diaphragmatic hernia, obstructive   | Diaphragmatic hernias                                  | Abdominal hernias and other abdominal wall conditions | Gastrointestinal disorders |
| Diarrhoea                           | Diarrhoea (excl infective)                             | Gastrointestinal motility and defaecation conditions  | Gastrointestinal disorders |
| Diarrhoea haemorrhagic              | Diarrhoea (excl infective)                             | Gastrointestinal motility and defaecation conditions  | Gastrointestinal disorders |

|                                         |                                                        |                                                      |                            |
|-----------------------------------------|--------------------------------------------------------|------------------------------------------------------|----------------------------|
| Diarrhoea neonatal                      | Diarrhoea (excl infective)                             | Gastrointestinal motility and defaecation conditions | Gastrointestinal disorders |
| Diverticular fistula                    | Gastrointestinal fistulae                              | Gastrointestinal conditions NEC                      | Gastrointestinal disorders |
| Diverticulitis intestinal haemorrhagic  | Diverticulum inflammations                             | Diverticular disorders                               | Gastrointestinal disorders |
| Diverticulitis oesophageal              | Diverticulum inflammations                             | Diverticular disorders                               | Gastrointestinal disorders |
| Diverticulum                            | Diverticula                                            | Diverticular disorders                               | Gastrointestinal disorders |
| Diverticulum gastric                    | Diverticula                                            | Diverticular disorders                               | Gastrointestinal disorders |
| Diverticulum intestinal                 | Diverticula                                            | Diverticular disorders                               | Gastrointestinal disorders |
| Diverticulum intestinal haemorrhagic    | Diverticula                                            | Diverticular disorders                               | Gastrointestinal disorders |
| Diverticulum oesophageal                | Diverticula                                            | Diverticular disorders                               | Gastrointestinal disorders |
| Dry mouth                               | Oral dryness and saliva altered                        | Salivary gland conditions                            | Gastrointestinal disorders |
| Duodenal fistula                        | Gastrointestinal fistulae                              | Gastrointestinal conditions NEC                      | Gastrointestinal disorders |
| Duodenal obstruction                    | Duodenal and small intestinal stenosis and obstruction | Gastrointestinal stenosis and obstruction            | Gastrointestinal disorders |
| Duodenal perforation                    | Duodenal ulcers and perforation                        | Gastrointestinal ulceration and perforation          | Gastrointestinal disorders |
| Duodenal polyp                          | Benign neoplasms gastrointestinal (excl oral cavity)   | Benign neoplasms gastrointestinal                    | Gastrointestinal disorders |
| Duodenal ulcer                          | Duodenal ulcers and perforation                        | Gastrointestinal ulceration and perforation          | Gastrointestinal disorders |
| Duodenal ulcer haemorrhage              | Duodenal ulcers and perforation                        | Gastrointestinal ulceration and perforation          | Gastrointestinal disorders |
| Duodenal ulcer perforation              | Duodenal ulcers and perforation                        | Gastrointestinal ulceration and perforation          | Gastrointestinal disorders |
| Duodenal ulcer perforation, obstructive | Duodenal ulcers and perforation                        | Gastrointestinal ulceration and perforation          | Gastrointestinal disorders |
| Duodenal ulcer, obstructive             | Duodenal ulcers and perforation                        | Gastrointestinal ulceration and perforation          | Gastrointestinal disorders |
| Duodenitis                              | Gastrointestinal inflammatory disorders NEC            | Gastrointestinal inflammatory conditions             | Gastrointestinal disorders |

|                             |                                             |                                                       |                            |
|-----------------------------|---------------------------------------------|-------------------------------------------------------|----------------------------|
| Duodenitis haemorrhagic     | Gastrointestinal inflammatory disorders NEC | Gastrointestinal inflammatory conditions              | Gastrointestinal disorders |
| Dyskinesia oesophageal      | Gastrointestinal dyskinetic disorders       | Gastrointestinal motility and defaecation conditions  | Gastrointestinal disorders |
| Dyspepsia                   | Dyspeptic signs and symptoms                | Gastrointestinal signs and symptoms                   | Gastrointestinal disorders |
| Dysphagia                   | Gastrointestinal signs and symptoms NEC     | Gastrointestinal signs and symptoms                   | Gastrointestinal disorders |
| Enamel anomaly              | Dental surface disorders                    | Dental and gingival conditions                        | Gastrointestinal disorders |
| Enteritis                   | Gastrointestinal inflammatory disorders NEC | Gastrointestinal inflammatory conditions              | Gastrointestinal disorders |
| Enteritis leukopenic        | Gastrointestinal inflammatory disorders NEC | Gastrointestinal inflammatory conditions              | Gastrointestinal disorders |
| Enterocoele                 | Abdominal cavity hernias NEC                | Abdominal hernias and other abdominal wall conditions | Gastrointestinal disorders |
| Enterocolitis               | Gastrointestinal inflammatory disorders NEC | Gastrointestinal inflammatory conditions              | Gastrointestinal disorders |
| Enterocolitis haemorrhagic  | Colitis (excl infective)                    | Gastrointestinal inflammatory conditions              | Gastrointestinal disorders |
| Eructation                  | Dyspeptic signs and symptoms                | Gastrointestinal signs and symptoms                   | Gastrointestinal disorders |
| Faecal incontinence         | Gastrointestinal signs and symptoms NEC     | Gastrointestinal signs and symptoms                   | Gastrointestinal disorders |
| Faeces discoloured          | Faecal abnormalities NEC                    | Gastrointestinal signs and symptoms                   | Gastrointestinal disorders |
| Faeces hard                 | Faecal abnormalities NEC                    | Gastrointestinal signs and symptoms                   | Gastrointestinal disorders |
| Faeces pale                 | Faecal abnormalities NEC                    | Gastrointestinal signs and symptoms                   | Gastrointestinal disorders |
| Femoral hernia              | Femoral hernias                             | Abdominal hernias and other abdominal wall conditions | Gastrointestinal disorders |
| Femoral hernia, obstructive | Femoral hernias                             | Abdominal hernias and other abdominal wall conditions | Gastrointestinal disorders |
| Flatulence                  | Flatulence, bloating and distension         | Gastrointestinal signs and symptoms                   | Gastrointestinal disorders |
| Fluorosis dental            | Dental surface disorders                    | Dental and gingival conditions                        | Gastrointestinal disorders |
| Food poisoning              | Gastrointestinal disorders NEC              | Gastrointestinal conditions NEC                       | Gastrointestinal disorders |

|                                        |                                                              |                                                      |                            |
|----------------------------------------|--------------------------------------------------------------|------------------------------------------------------|----------------------------|
| Frequent bowel movements               | Gastrointestinal spastic and hypermotility disorders         | Gastrointestinal motility and defaecation conditions | Gastrointestinal disorders |
| Gallstone ileus                        | Gastrointestinal stenosis and obstruction NEC                | Gastrointestinal stenosis and obstruction            | Gastrointestinal disorders |
| Gastric atony                          | Gastrointestinal atonic and hypomotility disorders NEC       | Gastrointestinal motility and defaecation conditions | Gastrointestinal disorders |
| Gastric dilatation                     | Gastrointestinal atonic and hypomotility disorders NEC       | Gastrointestinal motility and defaecation conditions | Gastrointestinal disorders |
| Gastric haemorrhage                    | Gastric and oesophageal haemorrhages                         | Gastrointestinal haemorrhages NEC                    | Gastrointestinal disorders |
| Gastric mucosal hypertrophy            | Gastrointestinal mucosal dystrophies and secretion disorders | Gastrointestinal conditions NEC                      | Gastrointestinal disorders |
| Gastric perforation                    | Gastric ulcers and perforation                               | Gastrointestinal ulceration and perforation          | Gastrointestinal disorders |
| Gastric polyps                         | Benign neoplasms gastrointestinal (excl oral cavity)         | Benign neoplasms gastrointestinal                    | Gastrointestinal disorders |
| Gastric ulcer                          | Gastric ulcers and perforation                               | Gastrointestinal ulceration and perforation          | Gastrointestinal disorders |
| Gastric ulcer haemorrhage              | Gastric ulcers and perforation                               | Gastrointestinal ulceration and perforation          | Gastrointestinal disorders |
| Gastric ulcer haemorrhage, obstructive | Gastric ulcers and perforation                               | Gastrointestinal ulceration and perforation          | Gastrointestinal disorders |
| Gastric ulcer perforation              | Gastric ulcers and perforation                               | Gastrointestinal ulceration and perforation          | Gastrointestinal disorders |
| Gastric ulcer perforation, obstructive | Gastric ulcers and perforation                               | Gastrointestinal ulceration and perforation          | Gastrointestinal disorders |
| Gastric ulcer, obstructive             | Gastric ulcers and perforation                               | Gastrointestinal ulceration and perforation          | Gastrointestinal disorders |
| Gastritis                              | Gastritis (excl infective)                                   | Gastrointestinal inflammatory conditions             | Gastrointestinal disorders |
| Gastritis alcoholic                    | Gastritis (excl infective)                                   | Gastrointestinal inflammatory conditions             | Gastrointestinal disorders |
| Gastritis alcoholic haemorrhagic       | Gastritis (excl infective)                                   | Gastrointestinal inflammatory conditions             | Gastrointestinal disorders |
| Gastritis erosive                      | Gastric ulcers and perforation                               | Gastrointestinal ulceration and perforation          | Gastrointestinal disorders |
| Gastritis haemorrhagic                 | Gastritis (excl infective)                                   | Gastrointestinal inflammatory conditions             | Gastrointestinal disorders |
| Gastritis hypertrophic                 | Gastritis (excl infective)                                   | Gastrointestinal inflammatory conditions             | Gastrointestinal disorders |

|                                               |                                                                 |                                                      |                            |
|-----------------------------------------------|-----------------------------------------------------------------|------------------------------------------------------|----------------------------|
| Gastrointestinal fistula                      | Gastrointestinal fistulae                                       | Gastrointestinal conditions NEC                      | Gastrointestinal disorders |
| Gastroesophageal reflux disease               | Gastrointestinal atonic and hypomotility disorders NEC          | Gastrointestinal motility and defaecation conditions | Gastrointestinal disorders |
| Gastroduodenal ulcer                          | Duodenal ulcers and perforation                                 | Gastrointestinal ulceration and perforation          | Gastrointestinal disorders |
| Gastroenteritis eosinophilic                  | Gastrointestinal inflammatory disorders NEC                     | Gastrointestinal inflammatory conditions             | Gastrointestinal disorders |
| Gastrointestinal angiodyplasia                | Gastrointestinal vascular malformations                         | Gastrointestinal vascular conditions                 | Gastrointestinal disorders |
| Gastrointestinal angiodyplasia haemorrhagic   | Gastrointestinal vascular malformations                         | Gastrointestinal vascular conditions                 | Gastrointestinal disorders |
| Gastrointestinal disorder                     | Gastrointestinal disorders NEC                                  | Gastrointestinal conditions NEC                      | Gastrointestinal disorders |
| Gastrointestinal haemorrhage                  | Non-site specific gastrointestinal haemorrhages                 | Gastrointestinal haemorrhages NEC                    | Gastrointestinal disorders |
| Gastrointestinal mucocoele                    | Gastrointestinal mucosal dystrophies and secretion disorders    | Gastrointestinal conditions NEC                      | Gastrointestinal disorders |
| Gastrointestinal mucosal necrosis             | Gastrointestinal necrosis and gangrene (excl gangrenous hernia) | Gastrointestinal vascular conditions                 | Gastrointestinal disorders |
| Gastrointestinal necrosis                     | Gastrointestinal necrosis and gangrene (excl gangrenous hernia) | Gastrointestinal vascular conditions                 | Gastrointestinal disorders |
| Gastrointestinal pain                         | Gastrointestinal and abdominal pains (excl oral and throat)     | Gastrointestinal signs and symptoms                  | Gastrointestinal disorders |
| Gastrointestinal perforation                  | Gastrointestinal ulcers and perforation, site unspecified       | Gastrointestinal ulceration and perforation          | Gastrointestinal disorders |
| Gastrointestinal stenosis                     | Gastrointestinal stenosis and obstruction NEC                   | Gastrointestinal stenosis and obstruction            | Gastrointestinal disorders |
| Gastrointestinal tract mucosal discolouration | Gastrointestinal mucosal dystrophies and secretion disorders    | Gastrointestinal conditions NEC                      | Gastrointestinal disorders |
| Gastroptosis                                  | Gastrointestinal disorders NEC                                  | Gastrointestinal conditions NEC                      | Gastrointestinal disorders |
| Giant cell epulis                             | Gingival disorders NEC                                          | Dental and gingival conditions                       | Gastrointestinal disorders |
| Gingival atrophy                              | Gingival disorders NEC                                          | Dental and gingival conditions                       | Gastrointestinal disorders |
| Gingival bleeding                             | Gingival haemorrhages                                           | Dental and gingival conditions                       | Gastrointestinal disorders |
| Gingival discolouration                       | Gingival discolourations                                        | Dental and gingival conditions                       | Gastrointestinal disorders |



|                                |                                                              |                                                       |                            |
|--------------------------------|--------------------------------------------------------------|-------------------------------------------------------|----------------------------|
| Gingival disorder              | Gingival disorders NEC                                       | Dental and gingival conditions                        | Gastrointestinal disorders |
| Gingival erosion               | Gingival disorders NEC                                       | Dental and gingival conditions                        | Gastrointestinal disorders |
| Gingival hyperplasia           | Gingival disorders NEC                                       | Dental and gingival conditions                        | Gastrointestinal disorders |
| Gingival hypertrophy           | Gingival disorders NEC                                       | Dental and gingival conditions                        | Gastrointestinal disorders |
| Gingival hypoplasia            | Gingival disorders NEC                                       | Dental and gingival conditions                        | Gastrointestinal disorders |
| Gingival pain                  | Gingival pains                                               | Dental and gingival conditions                        | Gastrointestinal disorders |
| Gingival polyp                 | Benign oral cavity neoplasms                                 | Benign neoplasms gastrointestinal                     | Gastrointestinal disorders |
| Gingival recession             | Gingival disorders NEC                                       | Dental and gingival conditions                        | Gastrointestinal disorders |
| Gingival swelling              | Oral soft tissue swelling and oedema                         | Oral soft tissue conditions                           | Gastrointestinal disorders |
| Gingivitis ulcerative          | Gingival disorders NEC                                       | Dental and gingival conditions                        | Gastrointestinal disorders |
| Glossitis                      | Tongue disorders                                             | Tongue conditions                                     | Gastrointestinal disorders |
| Glossodynia                    | Tongue signs and symptoms                                    | Tongue conditions                                     | Gastrointestinal disorders |
| Haematemesis                   | Non-site specific gastrointestinal haemorrhages              | Gastrointestinal haemorrhages NEC                     | Gastrointestinal disorders |
| Haematochezia                  | Non-site specific gastrointestinal haemorrhages              | Gastrointestinal haemorrhages NEC                     | Gastrointestinal disorders |
| Haemorrhoids                   | Haemorrhoids and gastrointestinal varices (excl oesophageal) | Gastrointestinal vascular conditions                  | Gastrointestinal disorders |
| Haemorrhoids thrombosed        | Haemorrhoids and gastrointestinal varices (excl oesophageal) | Gastrointestinal vascular conditions                  | Gastrointestinal disorders |
| Hiatus hernia                  | Diaphragmatic hernias                                        | Abdominal hernias and other abdominal wall conditions | Gastrointestinal disorders |
| Hypercementosis                | Dental disorders NEC                                         | Dental and gingival conditions                        | Gastrointestinal disorders |
| Hyperchlorhydria               | Gastrointestinal mucosal dystrophies and secretion disorders | Gastrointestinal conditions NEC                       | Gastrointestinal disorders |
| Hypertrophy of tongue papillae | Tongue disorders                                             | Tongue conditions                                     | Gastrointestinal disorders |

|                              |                                                             |                                                       |                            |
|------------------------------|-------------------------------------------------------------|-------------------------------------------------------|----------------------------|
| Ileal perforation            | Intestinal ulcers and perforation NEC                       | Gastrointestinal ulceration and perforation           | Gastrointestinal disorders |
| Ileal stenosis               | Duodenal and small intestinal stenosis and obstruction      | Gastrointestinal stenosis and obstruction             | Gastrointestinal disorders |
| Ileal ulcer                  | Intestinal ulcers and perforation NEC                       | Gastrointestinal ulceration and perforation           | Gastrointestinal disorders |
| Ileal ulcer perforation      | Intestinal ulcers and perforation NEC                       | Gastrointestinal ulceration and perforation           | Gastrointestinal disorders |
| Ileus                        | Gastrointestinal stenosis and obstruction NEC               | Gastrointestinal stenosis and obstruction             | Gastrointestinal disorders |
| Ileus paralytic              | Non-mechanical ileus                                        | Gastrointestinal motility and defaecation conditions  | Gastrointestinal disorders |
| Ileus spastic                | Non-mechanical ileus                                        | Gastrointestinal motility and defaecation conditions  | Gastrointestinal disorders |
| Impaired gastric emptying    | Gastrointestinal atonic and hypomotility disorders NEC      | Gastrointestinal motility and defaecation conditions  | Gastrointestinal disorders |
| Infantile colic              | Gastrointestinal and abdominal pains (excl oral and throat) | Gastrointestinal signs and symptoms                   | Gastrointestinal disorders |
| Inflammatory bowel disease   | Colitis (excl infective)                                    | Gastrointestinal inflammatory conditions              | Gastrointestinal disorders |
| Inguinal hernia              | Inguinal hernias                                            | Abdominal hernias and other abdominal wall conditions | Gastrointestinal disorders |
| Inguinal hernia, obstructive | Inguinal hernias                                            | Abdominal hernias and other abdominal wall conditions | Gastrointestinal disorders |
| Intestinal angina            | Gastrointestinal vascular occlusion and infarction          | Gastrointestinal vascular conditions                  | Gastrointestinal disorders |
| Intestinal dilatation        | Gastrointestinal atonic and hypomotility disorders NEC      | Gastrointestinal motility and defaecation conditions  | Gastrointestinal disorders |
| Intestinal fistula           | Gastrointestinal fistulae                                   | Gastrointestinal conditions NEC                       | Gastrointestinal disorders |
| Intestinal infarction        | Gastrointestinal vascular occlusion and infarction          | Gastrointestinal vascular conditions                  | Gastrointestinal disorders |
| Intestinal ischaemia         | Gastrointestinal vascular occlusion and infarction          | Gastrointestinal vascular conditions                  | Gastrointestinal disorders |
| Intestinal obstruction       | Gastrointestinal stenosis and obstruction NEC               | Gastrointestinal stenosis and obstruction             | Gastrointestinal disorders |
| Intestinal perforation       | Intestinal ulcers and perforation NEC                       | Gastrointestinal ulceration and perforation           | Gastrointestinal disorders |
| Intestinal stenosis          | Gastrointestinal stenosis and obstruction NEC               | Gastrointestinal stenosis and obstruction             | Gastrointestinal disorders |

|                             |                                                        |                                                       |                            |
|-----------------------------|--------------------------------------------------------|-------------------------------------------------------|----------------------------|
| Intestinal ulcer            | Intestinal ulcers and perforation NEC                  | Gastrointestinal ulceration and perforation           | Gastrointestinal disorders |
| Intussusception             | Gastrointestinal stenosis and obstruction NEC          | Gastrointestinal stenosis and obstruction             | Gastrointestinal disorders |
| Irritable bowel syndrome    | Gastrointestinal spastic and hypermotility disorders   | Gastrointestinal motility and defaecation conditions  | Gastrointestinal disorders |
| Ischiatic hernia            | Abdominal cavity hernias NEC                           | Abdominal hernias and other abdominal wall conditions | Gastrointestinal disorders |
| Ischiorectal hernia         | Abdominal cavity hernias NEC                           | Abdominal hernias and other abdominal wall conditions | Gastrointestinal disorders |
| Jejunal perforation         | Intestinal ulcers and perforation NEC                  | Gastrointestinal ulceration and perforation           | Gastrointestinal disorders |
| Jejunal stenosis            | Duodenal and small intestinal stenosis and obstruction | Gastrointestinal stenosis and obstruction             | Gastrointestinal disorders |
| Jejunal ulcer               | Intestinal ulcers and perforation NEC                  | Gastrointestinal ulceration and perforation           | Gastrointestinal disorders |
| Jejunal ulcer perforation   | Intestinal ulcers and perforation NEC                  | Gastrointestinal ulceration and perforation           | Gastrointestinal disorders |
| Large intestinal ulcer      | Intestinal ulcers and perforation NEC                  | Gastrointestinal ulceration and perforation           | Gastrointestinal disorders |
| Large intestine perforation | Intestinal ulcers and perforation NEC                  | Gastrointestinal ulceration and perforation           | Gastrointestinal disorders |
| Leukoplakia oesophageal     | Oesophageal disorders NEC                              | Gastrointestinal conditions NEC                       | Gastrointestinal disorders |
| Leukoplakia oral            | Oral soft tissue disorders NEC                         | Oral soft tissue conditions                           | Gastrointestinal disorders |
| Lip discolouration          | Oral soft tissue signs and symptoms                    | Oral soft tissue conditions                           | Gastrointestinal disorders |
| Lip dry                     | Oral dryness and saliva altered                        | Salivary gland conditions                             | Gastrointestinal disorders |
| Lip oedema                  | Oral soft tissue swelling and oedema                   | Oral soft tissue conditions                           | Gastrointestinal disorders |
| Lip pain                    | Oral soft tissue pain and paraesthesia                 | Oral soft tissue conditions                           | Gastrointestinal disorders |
| Lip swelling                | Oral soft tissue swelling and oedema                   | Oral soft tissue conditions                           | Gastrointestinal disorders |
| Lip ulceration              | Oral soft tissue disorders NEC                         | Oral soft tissue conditions                           | Gastrointestinal disorders |
| Lumbar hernia               | Abdominal cavity hernias NEC                           | Abdominal hernias and other abdominal wall conditions | Gastrointestinal disorders |

|                                   |                                                              |                                                      |                            |
|-----------------------------------|--------------------------------------------------------------|------------------------------------------------------|----------------------------|
| Lymphangiectasia intestinal       | Malabsorption syndromes                                      | Malabsorption conditions                             | Gastrointestinal disorders |
| Lymphoid hyperplasia of appendix  | Gastrointestinal disorders NEC                               | Gastrointestinal conditions NEC                      | Gastrointestinal disorders |
| Malabsorption                     | Malabsorption syndromes                                      | Malabsorption conditions                             | Gastrointestinal disorders |
| Mallory-Weiss syndrome            | Gastric and oesophageal haemorrhages                         | Gastrointestinal haemorrhages NEC                    | Gastrointestinal disorders |
| Meconium ileus                    | Duodenal and small intestinal stenosis and obstruction       | Gastrointestinal stenosis and obstruction            | Gastrointestinal disorders |
| Megacolon                         | Non-mechanical ileus                                         | Gastrointestinal motility and defaecation conditions | Gastrointestinal disorders |
| Melaena                           | Non-site specific gastrointestinal haemorrhages              | Gastrointestinal haemorrhages NEC                    | Gastrointestinal disorders |
| Melanosis coli                    | Gastrointestinal mucosal dystrophies and secretion disorders | Gastrointestinal conditions NEC                      | Gastrointestinal disorders |
| Mesenteric arterial occlusion     | Gastrointestinal vascular occlusion and infarction           | Gastrointestinal vascular conditions                 | Gastrointestinal disorders |
| Mesenteric artery embolism        | Gastrointestinal vascular occlusion and infarction           | Gastrointestinal vascular conditions                 | Gastrointestinal disorders |
| Mesenteric artery stenosis        | Gastrointestinal vascular occlusion and infarction           | Gastrointestinal vascular conditions                 | Gastrointestinal disorders |
| Mesenteric artery thrombosis      | Gastrointestinal vascular occlusion and infarction           | Gastrointestinal vascular conditions                 | Gastrointestinal disorders |
| Mesenteric fibrosis               | Peritoneal and retroperitoneal fibrosis and adhesions        | Peritoneal and retroperitoneal conditions            | Gastrointestinal disorders |
| Mesenteric vascular insufficiency | Gastrointestinal vascular occlusion and infarction           | Gastrointestinal vascular conditions                 | Gastrointestinal disorders |
| Mesenteric vein thrombosis        | Gastrointestinal vascular occlusion and infarction           | Gastrointestinal vascular conditions                 | Gastrointestinal disorders |
| Mesenteric venous occlusion       | Gastrointestinal vascular occlusion and infarction           | Gastrointestinal vascular conditions                 | Gastrointestinal disorders |
| Mouth cyst                        | Benign oral cavity neoplasms                                 | Benign neoplasms gastrointestinal                    | Gastrointestinal disorders |
| Mouth haemorrhage                 | Oral soft tissue haemorrhages                                | Oral soft tissue conditions                          | Gastrointestinal disorders |
| Mouth ulceration                  | Stomatitis and ulceration                                    | Oral soft tissue conditions                          | Gastrointestinal disorders |
| Mucous stools                     | Faecal abnormalities NEC                                     | Gastrointestinal signs and symptoms                  | Gastrointestinal disorders |

|                                 |                                                             |                                                       |                            |
|---------------------------------|-------------------------------------------------------------|-------------------------------------------------------|----------------------------|
| Nausea                          | Nausea and vomiting symptoms                                | Gastrointestinal signs and symptoms                   | Gastrointestinal disorders |
| Neonatal intestinal obstruction | Gastrointestinal stenosis and obstruction NEC               | Gastrointestinal stenosis and obstruction             | Gastrointestinal disorders |
| Obstruction gastric             | Gastric and pyloric stenosis and obstruction                | Gastrointestinal stenosis and obstruction             | Gastrointestinal disorders |
| Obturator hernia                | Abdominal cavity hernias NEC                                | Abdominal hernias and other abdominal wall conditions | Gastrointestinal disorders |
| Odynophagia                     | Oral soft tissue pain and paraesthesia                      | Oral soft tissue conditions                           | Gastrointestinal disorders |
| Oedema mouth                    | Oral soft tissue swelling and oedema                        | Oral soft tissue conditions                           | Gastrointestinal disorders |
| Oesophageal achalasia           | Gastrointestinal dyskinetic disorders                       | Gastrointestinal motility and defaecation conditions  | Gastrointestinal disorders |
| Oesophageal dilatation          | Oesophageal disorders NEC                                   | Gastrointestinal conditions NEC                       | Gastrointestinal disorders |
| Oesophageal haemorrhage         | Gastric and oesophageal haemorrhages                        | Gastrointestinal haemorrhages NEC                     | Gastrointestinal disorders |
| Oesophageal obstruction         | Oesophageal stenosis and obstruction                        | Gastrointestinal stenosis and obstruction             | Gastrointestinal disorders |
| Oesophageal pain                | Gastrointestinal and abdominal pains (excl oral and throat) | Gastrointestinal signs and symptoms                   | Gastrointestinal disorders |
| Oesophageal perforation         | Oesophageal ulcers and perforation                          | Gastrointestinal ulceration and perforation           | Gastrointestinal disorders |
| Oesophageal spasm               | Gastrointestinal spastic and hypermotility disorders        | Gastrointestinal motility and defaecation conditions  | Gastrointestinal disorders |
| Oesophageal stenosis            | Oesophageal stenosis and obstruction                        | Gastrointestinal stenosis and obstruction             | Gastrointestinal disorders |
| Oesophageal ulcer               | Oesophageal ulcers and perforation                          | Gastrointestinal ulceration and perforation           | Gastrointestinal disorders |
| Oesophageal ulcer haemorrhage   | Oesophageal ulcers and perforation                          | Gastrointestinal ulceration and perforation           | Gastrointestinal disorders |
| Oesophageal varices haemorrhage | Gastric and oesophageal haemorrhages                        | Gastrointestinal haemorrhages NEC                     | Gastrointestinal disorders |
| Oesophagitis                    | Oesophagitis (excl infective)                               | Gastrointestinal inflammatory conditions              | Gastrointestinal disorders |
| Oesophagitis haemorrhagic       | Oesophagitis (excl infective)                               | Gastrointestinal inflammatory conditions              | Gastrointestinal disorders |
| Oral discharge                  | Oral soft tissue signs and symptoms                         | Oral soft tissue conditions                           | Gastrointestinal disorders |

|                               |                                        |                              |                            |
|-------------------------------|----------------------------------------|------------------------------|----------------------------|
| Oral discomfort               | Oral soft tissue signs and symptoms    | Oral soft tissue conditions  | Gastrointestinal disorders |
| Oral lichen planus            | Oral soft tissue disorders NEC         | Oral soft tissue conditions  | Gastrointestinal disorders |
| Oral mucosal blistering       | Oral soft tissue signs and symptoms    | Oral soft tissue conditions  | Gastrointestinal disorders |
| Oral mucosal discolouration   | Oral soft tissue signs and symptoms    | Oral soft tissue conditions  | Gastrointestinal disorders |
| Oral mucosal eruption         | Oral soft tissue signs and symptoms    | Oral soft tissue conditions  | Gastrointestinal disorders |
| Oral pain                     | Oral soft tissue pain and paraesthesia | Oral soft tissue conditions  | Gastrointestinal disorders |
| Oral papule                   | Oral soft tissue disorders NEC         | Oral soft tissue conditions  | Gastrointestinal disorders |
| Oral submucosal fibrosis      | Oral soft tissue disorders NEC         | Oral soft tissue conditions  | Gastrointestinal disorders |
| Pancreatic atrophy            | Pancreatic disorders NEC               | Exocrine pancreas conditions | Gastrointestinal disorders |
| Pancreatic cyst               | Cystic pancreatic disorders            | Exocrine pancreas conditions | Gastrointestinal disorders |
| Pancreatic disorder           | Pancreatic disorders NEC               | Exocrine pancreas conditions | Gastrointestinal disorders |
| Pancreatic enzyme abnormality | Pancreatic disorders NEC               | Exocrine pancreas conditions | Gastrointestinal disorders |
| Pancreatic haemorrhage        | Pancreatic disorders NEC               | Exocrine pancreas conditions | Gastrointestinal disorders |
| Pancreatic insufficiency      | Pancreatic disorders NEC               | Exocrine pancreas conditions | Gastrointestinal disorders |
| Pancreatic pseudocyst         | Cystic pancreatic disorders            | Exocrine pancreas conditions | Gastrointestinal disorders |
| Pancreatitis                  | Acute and chronic pancreatitis         | Exocrine pancreas conditions | Gastrointestinal disorders |
| Pancreatitis acute            | Acute and chronic pancreatitis         | Exocrine pancreas conditions | Gastrointestinal disorders |
| Pancreatitis chronic          | Acute and chronic pancreatitis         | Exocrine pancreas conditions | Gastrointestinal disorders |
| Pancreatitis haemorrhagic     | Acute and chronic pancreatitis         | Exocrine pancreas conditions | Gastrointestinal disorders |
| Pancreatitis necrotising      | Acute and chronic pancreatitis         | Exocrine pancreas conditions | Gastrointestinal disorders |

|                                       |                                                       |                                             |                            |
|---------------------------------------|-------------------------------------------------------|---------------------------------------------|----------------------------|
| Pancreatitis relapsing                | Acute and chronic pancreatitis                        | Exocrine pancreas conditions                | Gastrointestinal disorders |
| Parotid duct obstruction              | Salivary gland stenosis and obstruction               | Salivary gland conditions                   | Gastrointestinal disorders |
| Parotid gland enlargement             | Salivary gland enlargements                           | Salivary gland conditions                   | Gastrointestinal disorders |
| Peptic ulcer                          | Peptic ulcers and perforation                         | Gastrointestinal ulceration and perforation | Gastrointestinal disorders |
| Peptic ulcer haemorrhage              | Peptic ulcers and perforation                         | Gastrointestinal ulceration and perforation | Gastrointestinal disorders |
| Peptic ulcer perforation              | Peptic ulcers and perforation                         | Gastrointestinal ulceration and perforation | Gastrointestinal disorders |
| Peptic ulcer perforation, obstructive | Peptic ulcers and perforation                         | Gastrointestinal ulceration and perforation | Gastrointestinal disorders |
| Peptic ulcer, obstructive             | Peptic ulcers and perforation                         | Gastrointestinal ulceration and perforation | Gastrointestinal disorders |
| Periodontal disease                   | Dental disorders NEC                                  | Dental and gingival conditions              | Gastrointestinal disorders |
| Peristalsis visible                   | Gastrointestinal signs and symptoms NEC               | Gastrointestinal signs and symptoms         | Gastrointestinal disorders |
| Peritoneal adhesions                  | Peritoneal and retroperitoneal fibrosis and adhesions | Peritoneal and retroperitoneal conditions   | Gastrointestinal disorders |
| Peritoneal fibrosis                   | Peritoneal and retroperitoneal fibrosis and adhesions | Peritoneal and retroperitoneal conditions   | Gastrointestinal disorders |
| Peritoneal haemorrhage                | Peritoneal and retroperitoneal haemorrhages           | Peritoneal and retroperitoneal conditions   | Gastrointestinal disorders |
| Peritonitis sclerosing                | Peritoneal and retroperitoneal disorders              | Peritoneal and retroperitoneal conditions   | Gastrointestinal disorders |
| Pigmentation buccal                   | Oral soft tissue disorders NEC                        | Oral soft tissue conditions                 | Gastrointestinal disorders |
| Pigmentation lip                      | Oral soft tissue disorders NEC                        | Oral soft tissue conditions                 | Gastrointestinal disorders |
| Plicated tongue                       | Tongue disorders                                      | Tongue conditions                           | Gastrointestinal disorders |
| Pouchitis                             | Gastrointestinal inflammatory disorders NEC           | Gastrointestinal inflammatory conditions    | Gastrointestinal disorders |
| Proctalgia                            | Anal and rectal pains                                 | Anal and rectal conditions NEC              | Gastrointestinal disorders |
| Proctitis                             | Rectal inflammations NEC                              | Gastrointestinal inflammatory conditions    | Gastrointestinal disorders |

|                             |                                                       |                                                       |                            |
|-----------------------------|-------------------------------------------------------|-------------------------------------------------------|----------------------------|
| Proctitis haemorrhagic      | Rectal inflammations NEC                              | Gastrointestinal inflammatory conditions              | Gastrointestinal disorders |
| Proctitis ulcerative        | Rectal inflammations NEC                              | Gastrointestinal inflammatory conditions              | Gastrointestinal disorders |
| Protrusion tongue           | Tongue signs and symptoms                             | Tongue conditions                                     | Gastrointestinal disorders |
| Pseudodiverticular disease  | Diverticula                                           | Diverticular disorders                                | Gastrointestinal disorders |
| Pseudopolyposis             | Colitis (excl infective)                              | Gastrointestinal inflammatory conditions              | Gastrointestinal disorders |
| Pudendal hernia             | Abdominal cavity hernias NEC                          | Abdominal hernias and other abdominal wall conditions | Gastrointestinal disorders |
| Pylorospasm                 | Gastrointestinal spastic and hypermotility disorders  | Gastrointestinal motility and defaecation conditions  | Gastrointestinal disorders |
| Radicular cyst              | Dental disorders NEC                                  | Dental and gingival conditions                        | Gastrointestinal disorders |
| Ranula                      | Salivary gland enlargements                           | Salivary gland conditions                             | Gastrointestinal disorders |
| Rectal haemorrhage          | Intestinal haemorrhages                               | Gastrointestinal haemorrhages NEC                     | Gastrointestinal disorders |
| Rectal perforation          | Anal and rectal ulcers and perforation                | Gastrointestinal ulceration and perforation           | Gastrointestinal disorders |
| Rectal polyp                | Benign neoplasms gastrointestinal (excl oral cavity)  | Benign neoplasms gastrointestinal                     | Gastrointestinal disorders |
| Rectal prolapse             | Anal and rectal disorders NEC                         | Anal and rectal conditions NEC                        | Gastrointestinal disorders |
| Rectal stenosis             | Anal and rectal stenosis and obstruction              | Gastrointestinal stenosis and obstruction             | Gastrointestinal disorders |
| Rectal ulcer                | Anal and rectal ulcers and perforation                | Gastrointestinal ulceration and perforation           | Gastrointestinal disorders |
| Rectal ulcer haemorrhage    | Anal and rectal ulcers and perforation                | Gastrointestinal ulceration and perforation           | Gastrointestinal disorders |
| Retching                    | Nausea and vomiting symptoms                          | Gastrointestinal signs and symptoms                   | Gastrointestinal disorders |
| Retroperitoneal fibrosis    | Peritoneal and retroperitoneal fibrosis and adhesions | Peritoneal and retroperitoneal conditions             | Gastrointestinal disorders |
| Retroperitoneal haemorrhage | Peritoneal and retroperitoneal haemorrhages           | Peritoneal and retroperitoneal conditions             | Gastrointestinal disorders |
| Retroperitoneal hernia      | Abdominal cavity hernias NEC                          | Abdominal hernias and other abdominal wall conditions | Gastrointestinal disorders |



|                              |                                                        |                                                       |                            |
|------------------------------|--------------------------------------------------------|-------------------------------------------------------|----------------------------|
| Retroperitoneal oedema       | Peritoneal and retroperitoneal disorders               | Peritoneal and retroperitoneal conditions             | Gastrointestinal disorders |
| Saliva altered               | Oral dryness and saliva altered                        | Salivary gland conditions                             | Gastrointestinal disorders |
| Salivary duct obstruction    | Salivary gland stenosis and obstruction                | Salivary gland conditions                             | Gastrointestinal disorders |
| Salivary duct stenosis       | Salivary gland stenosis and obstruction                | Salivary gland conditions                             | Gastrointestinal disorders |
| Salivary gland atrophy       | Salivary gland stenosis and obstruction                | Salivary gland conditions                             | Gastrointestinal disorders |
| Salivary gland calculus      | Salivary gland disorders NEC                           | Salivary gland conditions                             | Gastrointestinal disorders |
| Salivary gland enlargement   | Salivary gland enlargements                            | Salivary gland conditions                             | Gastrointestinal disorders |
| Salivary gland fistula       | Gastrointestinal fistulae                              | Gastrointestinal conditions NEC                       | Gastrointestinal disorders |
| Salivary gland pain          | Salivary gland disorders NEC                           | Salivary gland conditions                             | Gastrointestinal disorders |
| Salivary hypersecretion      | Oral dryness and saliva altered                        | Salivary gland conditions                             | Gastrointestinal disorders |
| Sciatic hernia               | Abdominal cavity hernias NEC                           | Abdominal hernias and other abdominal wall conditions | Gastrointestinal disorders |
| Sensitivity of teeth         | Dental pain and sensation disorders                    | Dental and gingival conditions                        | Gastrointestinal disorders |
| Sideropenic dysphagia        | Oesophageal stenosis and obstruction                   | Gastrointestinal stenosis and obstruction             | Gastrointestinal disorders |
| Small intestinal obstruction | Duodenal and small intestinal stenosis and obstruction | Gastrointestinal stenosis and obstruction             | Gastrointestinal disorders |
| Small intestinal perforation | Intestinal ulcers and perforation NEC                  | Gastrointestinal ulceration and perforation           | Gastrointestinal disorders |
| Small intestine ulcer        | Intestinal ulcers and perforation NEC                  | Gastrointestinal ulceration and perforation           | Gastrointestinal disorders |
| Spigelian hernia             | Abdominal cavity hernias NEC                           | Abdominal hernias and other abdominal wall conditions | Gastrointestinal disorders |
| Splenic artery aneurysm      | Gastrointestinal vascular malformations                | Gastrointestinal vascular conditions                  | Gastrointestinal disorders |
| Stasis syndrome              | Malabsorption syndromes                                | Malabsorption conditions                              | Gastrointestinal disorders |
| Steatorrhoea                 | Malabsorption syndromes                                | Malabsorption conditions                              | Gastrointestinal disorders |

|                                |                                                           |                                             |                            |
|--------------------------------|-----------------------------------------------------------|---------------------------------------------|----------------------------|
| Stomatitis                     | Stomatitis and ulceration                                 | Oral soft tissue conditions                 | Gastrointestinal disorders |
| Stomatitis haemorrhagic        | Stomatitis and ulceration                                 | Oral soft tissue conditions                 | Gastrointestinal disorders |
| Stomatitis necrotising         | Stomatitis and ulceration                                 | Oral soft tissue conditions                 | Gastrointestinal disorders |
| Stress ulcer                   | Gastrointestinal ulcers and perforation, site unspecified | Gastrointestinal ulceration and perforation | Gastrointestinal disorders |
| Submaxillary gland enlargement | Salivary gland enlargements                               | Salivary gland conditions                   | Gastrointestinal disorders |
| Supernumerary teeth            | Dental developmental disorders and anomalies              | Dental and gingival conditions              | Gastrointestinal disorders |
| Swollen tongue                 | Tongue signs and symptoms                                 | Tongue conditions                           | Gastrointestinal disorders |
| Teeth brittle                  | Dental disorders NEC                                      | Dental and gingival conditions              | Gastrointestinal disorders |
| Teething                       | Dental disorders NEC                                      | Dental and gingival conditions              | Gastrointestinal disorders |
| Thrombosis mesenteric vessel   | Gastrointestinal vascular occlusion and infarction        | Gastrointestinal vascular conditions        | Gastrointestinal disorders |
| Tongue blistering              | Tongue signs and symptoms                                 | Tongue conditions                           | Gastrointestinal disorders |
| Tongue coated                  | Tongue signs and symptoms                                 | Tongue conditions                           | Gastrointestinal disorders |
| Tongue discolouration          | Tongue signs and symptoms                                 | Tongue conditions                           | Gastrointestinal disorders |
| Tongue disorder                | Tongue disorders                                          | Tongue conditions                           | Gastrointestinal disorders |
| Tongue geographic              | Tongue disorders                                          | Tongue conditions                           | Gastrointestinal disorders |
| Tongue haematoma               | Tongue disorders                                          | Tongue conditions                           | Gastrointestinal disorders |
| Tongue movement disturbance    | Tongue signs and symptoms                                 | Tongue conditions                           | Gastrointestinal disorders |
| Tongue oedema                  | Tongue signs and symptoms                                 | Tongue conditions                           | Gastrointestinal disorders |
| Tongue spasm                   | Tongue signs and symptoms                                 | Tongue conditions                           | Gastrointestinal disorders |
| Tongue ulceration              | Tongue disorders                                          | Tongue conditions                           | Gastrointestinal disorders |

|                                    |                                                              |                                                       |                            |
|------------------------------------|--------------------------------------------------------------|-------------------------------------------------------|----------------------------|
| Tooth ankylosis                    | Dental disorders NEC                                         | Dental and gingival conditions                        | Gastrointestinal disorders |
| Tooth delamination                 | Dental surface disorders                                     | Dental and gingival conditions                        | Gastrointestinal disorders |
| Tooth deposit                      | Dental disorders NEC                                         | Dental and gingival conditions                        | Gastrointestinal disorders |
| Tooth development disorder         | Dental developmental disorders and anomalies                 | Dental and gingival conditions                        | Gastrointestinal disorders |
| Tooth discolouration               | Dental surface disorders                                     | Dental and gingival conditions                        | Gastrointestinal disorders |
| Tooth disorder                     | Dental disorders NEC                                         | Dental and gingival conditions                        | Gastrointestinal disorders |
| Tooth erosion                      | Dental disorders NEC                                         | Dental and gingival conditions                        | Gastrointestinal disorders |
| Tooth impacted                     | Dental disorders NEC                                         | Dental and gingival conditions                        | Gastrointestinal disorders |
| Tooth loss                         | Tooth missing                                                | Dental and gingival conditions                        | Gastrointestinal disorders |
| Tooth malformation                 | Dental developmental disorders and anomalies                 | Dental and gingival conditions                        | Gastrointestinal disorders |
| Tooth resorption                   | Dental disorders NEC                                         | Dental and gingival conditions                        | Gastrointestinal disorders |
| Toothache                          | Dental pain and sensation disorders                          | Dental and gingival conditions                        | Gastrointestinal disorders |
| Toxic dilatation of intestine      | Gastrointestinal inflammatory disorders NEC                  | Gastrointestinal inflammatory conditions              | Gastrointestinal disorders |
| Umbilical hernia                   | Umbilical hernias                                            | Abdominal hernias and other abdominal wall conditions | Gastrointestinal disorders |
| Umbilical hernia, obstructive      | Umbilical hernias                                            | Abdominal hernias and other abdominal wall conditions | Gastrointestinal disorders |
| Upper gastrointestinal haemorrhage | Non-site specific gastrointestinal haemorrhages              | Gastrointestinal haemorrhages NEC                     | Gastrointestinal disorders |
| Varicose veins sublingual          | Haemorrhoids and gastrointestinal varices (excl oesophageal) | Gastrointestinal vascular conditions                  | Gastrointestinal disorders |
| Volvulus                           | Large intestinal stenosis and obstruction                    | Gastrointestinal stenosis and obstruction             | Gastrointestinal disorders |
| Vomiting                           | Nausea and vomiting symptoms                                 | Gastrointestinal signs and symptoms                   | Gastrointestinal disorders |
| Vomiting projectile                | Nausea and vomiting symptoms                                 | Gastrointestinal signs and symptoms                   | Gastrointestinal disorders |

|                               |                                                      |                                                       |                            |
|-------------------------------|------------------------------------------------------|-------------------------------------------------------|----------------------------|
| Pneumoperitoneum              | Peritoneal and retroperitoneal disorders             | Peritoneal and retroperitoneal conditions             | Gastrointestinal disorders |
| Vasculitis gastrointestinal   | Gastrointestinal inflammatory disorders NEC          | Gastrointestinal inflammatory conditions              | Gastrointestinal disorders |
| Lip disorder                  | Oral soft tissue disorders NEC                       | Oral soft tissue conditions                           | Gastrointestinal disorders |
| Buccal mucosal roughening     | Oral soft tissue signs and symptoms                  | Oral soft tissue conditions                           | Gastrointestinal disorders |
| Intestinal polyp              | Benign neoplasms gastrointestinal (excl oral cavity) | Benign neoplasms gastrointestinal                     | Gastrointestinal disorders |
| Neurogenic bowel              | Gastrointestinal disorders NEC                       | Gastrointestinal conditions NEC                       | Gastrointestinal disorders |
| Gastroduodenitis haemorrhagic | Gastritis (excl infective)                           | Gastrointestinal inflammatory conditions              | Gastrointestinal disorders |
| Gastroduodenitis              | Gastritis (excl infective)                           | Gastrointestinal inflammatory conditions              | Gastrointestinal disorders |
| Peritoneal hernia             | Abdominal cavity hernias NEC                         | Abdominal hernias and other abdominal wall conditions | Gastrointestinal disorders |
| Parotid lipomatosis           | Salivary gland disorders NEC                         | Salivary gland conditions                             | Gastrointestinal disorders |
| Chapped lips                  | Oral soft tissue disorders NEC                       | Oral soft tissue conditions                           | Gastrointestinal disorders |
| Sialiectasia                  | Salivary gland disorders NEC                         | Salivary gland conditions                             | Gastrointestinal disorders |
| Saliva discolouration         | Oral dryness and saliva altered                      | Salivary gland conditions                             | Gastrointestinal disorders |
| Pancreatic mass               | Pancreatic disorders NEC                             | Exocrine pancreas conditions                          | Gastrointestinal disorders |
| Oesophagitis ulcerative       | Oesophageal ulcers and perforation                   | Gastrointestinal ulceration and perforation           | Gastrointestinal disorders |
| Rectal discharge              | Anal and rectal signs and symptoms                   | Anal and rectal conditions NEC                        | Gastrointestinal disorders |
| Necrotising gastritis         | Gastritis (excl infective)                           | Gastrointestinal inflammatory conditions              | Gastrointestinal disorders |
| Pancreatic fistula            | Gastrointestinal fistulae                            | Gastrointestinal conditions NEC                       | Gastrointestinal disorders |
| Ankyloglossia acquired        | Tongue disorders                                     | Tongue conditions                                     | Gastrointestinal disorders |
| Heyde's syndrome              | Gastrointestinal vascular malformations              | Gastrointestinal vascular conditions                  | Gastrointestinal disorders |

|                                   |                                                              |                                           |                            |
|-----------------------------------|--------------------------------------------------------------|-------------------------------------------|----------------------------|
| Lip haemorrhage                   | Oral soft tissue haemorrhages                                | Oral soft tissue conditions               | Gastrointestinal disorders |
| Gingival blister                  | Oral soft tissue signs and symptoms                          | Oral soft tissue conditions               | Gastrointestinal disorders |
| Gingival oedema                   | Oral soft tissue swelling and oedema                         | Oral soft tissue conditions               | Gastrointestinal disorders |
| Gingival pruritus                 | Oral soft tissue signs and symptoms                          | Oral soft tissue conditions               | Gastrointestinal disorders |
| Lip blister                       | Oral soft tissue disorders NEC                               | Oral soft tissue conditions               | Gastrointestinal disorders |
| Gingival ulceration               | Gingival disorders NEC                                       | Dental and gingival conditions            | Gastrointestinal disorders |
| Short-bowel syndrome              | Malabsorption syndromes                                      | Malabsorption conditions                  | Gastrointestinal disorders |
| Intestinal villi atrophy          | Gastrointestinal mucosal dystrophies and secretion disorders | Gastrointestinal conditions NEC           | Gastrointestinal disorders |
| Anal haemorrhage                  | Intestinal haemorrhages                                      | Gastrointestinal haemorrhages NEC         | Gastrointestinal disorders |
| Gingival hyperpigmentation        | Gingival discolourations                                     | Dental and gingival conditions            | Gastrointestinal disorders |
| Tongue dry                        | Tongue signs and symptoms                                    | Tongue conditions                         | Gastrointestinal disorders |
| Abdominal migraine                | Gastrointestinal and abdominal pains (excl oral and throat)  | Gastrointestinal signs and symptoms       | Gastrointestinal disorders |
| Melaena neonatal                  | Non-site specific gastrointestinal haemorrhages              | Gastrointestinal haemorrhages NEC         | Gastrointestinal disorders |
| Anal sphincter atony              | Anal and rectal disorders NEC                                | Anal and rectal conditions NEC            | Gastrointestinal disorders |
| Aphagia                           | Gastrointestinal signs and symptoms NEC                      | Gastrointestinal signs and symptoms       | Gastrointestinal disorders |
| Tongue haemorrhage                | Tongue disorders                                             | Tongue conditions                         | Gastrointestinal disorders |
| Faecal volume increased           | Faecal abnormalities NEC                                     | Gastrointestinal signs and symptoms       | Gastrointestinal disorders |
| Duodenal stenosis                 | Duodenal and small intestinal stenosis and obstruction       | Gastrointestinal stenosis and obstruction | Gastrointestinal disorders |
| Gastrointestinal dysplasia        | Gastrointestinal mucosal dystrophies and secretion disorders | Gastrointestinal conditions NEC           | Gastrointestinal disorders |
| Enterochromaffin cell hyperplasia | Gastrointestinal mucosal dystrophies and secretion disorders | Gastrointestinal conditions NEC           | Gastrointestinal disorders |

|                                    |                                                              |                                                      |                            |
|------------------------------------|--------------------------------------------------------------|------------------------------------------------------|----------------------------|
| Gastric dysplasia                  | Gastrointestinal mucosal dystrophies and secretion disorders | Gastrointestinal conditions NEC                      | Gastrointestinal disorders |
| Oesophageal dysplasia              | Gastrointestinal mucosal dystrophies and secretion disorders | Gastrointestinal conditions NEC                      | Gastrointestinal disorders |
| Oral mucosa atrophy                | Oral soft tissue disorders NEC                               | Oral soft tissue conditions                          | Gastrointestinal disorders |
| Prepyloric stenosis                | Gastric and pyloric stenosis and obstruction                 | Gastrointestinal stenosis and obstruction            | Gastrointestinal disorders |
| Anal inflammation                  | Anal and rectal signs and symptoms                           | Anal and rectal conditions NEC                       | Gastrointestinal disorders |
| Faecal volume decreased            | Faecal abnormalities NEC                                     | Gastrointestinal signs and symptoms                  | Gastrointestinal disorders |
| Anovulvar fistula                  | Gastrointestinal fistulae                                    | Gastrointestinal conditions NEC                      | Gastrointestinal disorders |
| Paresis anal sphincter             | Anal and rectal disorders NEC                                | Anal and rectal conditions NEC                       | Gastrointestinal disorders |
| Subileus                           | Gastrointestinal stenosis and obstruction NEC                | Gastrointestinal stenosis and obstruction            | Gastrointestinal disorders |
| Chronic gastrointestinal bleeding  | Non-site specific gastrointestinal haemorrhages              | Gastrointestinal haemorrhages NEC                    | Gastrointestinal disorders |
| Oral dysaesthesia                  | Oral soft tissue disorders NEC                               | Oral soft tissue conditions                          | Gastrointestinal disorders |
| Portal hypertensive gastropathy    | Gastric and oesophageal haemorrhages                         | Gastrointestinal haemorrhages NEC                    | Gastrointestinal disorders |
| Lower gastrointestinal haemorrhage | Non-site specific gastrointestinal haemorrhages              | Gastrointestinal haemorrhages NEC                    | Gastrointestinal disorders |
| Duodenal varices                   | Haemorrhoids and gastrointestinal varices (excl oesophageal) | Gastrointestinal vascular conditions                 | Gastrointestinal disorders |
| Gastric varices                    | Haemorrhoids and gastrointestinal varices (excl oesophageal) | Gastrointestinal vascular conditions                 | Gastrointestinal disorders |
| Cheilitis granulomatosa            | Oral soft tissue disorders NEC                               | Oral soft tissue conditions                          | Gastrointestinal disorders |
| Diabetic gastroparesis             | Gastrointestinal atonic and hypomotility disorders NEC       | Gastrointestinal motility and defaecation conditions | Gastrointestinal disorders |
| Parotid gland haemorrhage          | Salivary gland disorders NEC                                 | Salivary gland conditions                            | Gastrointestinal disorders |
| Dyschezia                          | Gastrointestinal dyskinetic disorders                        | Gastrointestinal motility and defaecation conditions | Gastrointestinal disorders |
| Pancreatolithiasis                 | Pancreatic disorders NEC                                     | Exocrine pancreas conditions                         | Gastrointestinal disorders |

|                                 |                                                              |                                                       |                            |
|---------------------------------|--------------------------------------------------------------|-------------------------------------------------------|----------------------------|
| Gastroesophageal heterotopia    | Gastrointestinal mucosal dystrophies and secretion disorders | Gastrointestinal conditions NEC                       | Gastrointestinal disorders |
| Mechanical ileus                | Gastrointestinal stenosis and obstruction NEC                | Gastrointestinal stenosis and obstruction             | Gastrointestinal disorders |
| Small bowel angioedema          | Gastrointestinal inflammatory disorders NEC                  | Gastrointestinal inflammatory conditions              | Gastrointestinal disorders |
| Buccal polyp                    | Benign oral cavity neoplasms                                 | Benign neoplasms gastrointestinal                     | Gastrointestinal disorders |
| Enterocutaneous fistula         | Gastrointestinal fistulae                                    | Gastrointestinal conditions NEC                       | Gastrointestinal disorders |
| Mikulicz's disease              | Salivary gland enlargements                                  | Salivary gland conditions                             | Gastrointestinal disorders |
| Proctoparalysis                 | Anal and rectal disorders NEC                                | Anal and rectal conditions NEC                        | Gastrointestinal disorders |
| Strawberry tongue               | Tongue signs and symptoms                                    | Tongue conditions                                     | Gastrointestinal disorders |
| Sialocele                       | Salivary gland disorders NEC                                 | Salivary gland conditions                             | Gastrointestinal disorders |
| Intestinal mucosal hypertrophy  | Gastrointestinal disorders NEC                               | Gastrointestinal conditions NEC                       | Gastrointestinal disorders |
| Gastric antral vascular ectasia | Gastrointestinal vascular malformations                      | Gastrointestinal vascular conditions                  | Gastrointestinal disorders |
| Large intestine polyp           | Benign neoplasms gastrointestinal (excl oral cavity)         | Benign neoplasms gastrointestinal                     | Gastrointestinal disorders |
| Necrotising colitis             | Colitis (excl infective)                                     | Gastrointestinal inflammatory conditions              | Gastrointestinal disorders |
| Abdominal wall cyst             | Abdominal wall conditions NEC                                | Abdominal hernias and other abdominal wall conditions | Gastrointestinal disorders |
| Chilaiditi's syndrome           | Abdominal findings abnormal                                  | Gastrointestinal signs and symptoms                   | Gastrointestinal disorders |
| Tongue dysplasia                | Tongue disorders                                             | Tongue conditions                                     | Gastrointestinal disorders |
| Retroperitoneum cyst            | Benign neoplasms gastrointestinal (excl oral cavity)         | Benign neoplasms gastrointestinal                     | Gastrointestinal disorders |
| Hypoaesthesia teeth             | Dental pain and sensation disorders                          | Dental and gingival conditions                        | Gastrointestinal disorders |
| Sordes                          | Oral soft tissue signs and symptoms                          | Oral soft tissue conditions                           | Gastrointestinal disorders |
| Tongue cyst                     | Benign oral cavity neoplasms                                 | Benign neoplasms gastrointestinal                     | Gastrointestinal disorders |

|                                |                                                             |                                                       |                            |
|--------------------------------|-------------------------------------------------------------|-------------------------------------------------------|----------------------------|
| Oesophageal polyp              | Benign neoplasms gastrointestinal (excl oral cavity)        | Benign neoplasms gastrointestinal                     | Gastrointestinal disorders |
| Peritoneal cyst                | Peritoneal and retroperitoneal disorders                    | Peritoneal and retroperitoneal conditions             | Gastrointestinal disorders |
| Uvulitis                       | Oral soft tissue disorders NEC                              | Oral soft tissue conditions                           | Gastrointestinal disorders |
| Internal hernia                | Abdominal hernias, site unspecified                         | Abdominal hernias and other abdominal wall conditions | Gastrointestinal disorders |
| Lip erosion                    | Oral soft tissue disorders NEC                              | Oral soft tissue conditions                           | Gastrointestinal disorders |
| Anogenital dysplasia           | Anal and rectal disorders NEC                               | Anal and rectal conditions NEC                        | Gastrointestinal disorders |
| Tongue eruption                | Tongue signs and symptoms                                   | Tongue conditions                                     | Gastrointestinal disorders |
| Fibrosing colonopathy          | Large intestinal stenosis and obstruction                   | Gastrointestinal stenosis and obstruction             | Gastrointestinal disorders |
| Gastrointestinal hypomotility  | Gastrointestinal atonic and hypomotility disorders NEC      | Gastrointestinal motility and defaecation conditions  | Gastrointestinal disorders |
| Oesophageal rupture            | Oesophageal ulcers and perforation                          | Gastrointestinal ulceration and perforation           | Gastrointestinal disorders |
| Salivary gland cyst            | Salivary gland disorders NEC                                | Salivary gland conditions                             | Gastrointestinal disorders |
| Mikulicz's syndrome            | Salivary gland enlargements                                 | Salivary gland conditions                             | Gastrointestinal disorders |
| Oedematous pancreatitis        | Acute and chronic pancreatitis                              | Exocrine pancreas conditions                          | Gastrointestinal disorders |
| Gastrointestinal hypermotility | Gastrointestinal spastic and hypermotility disorders        | Gastrointestinal motility and defaecation conditions  | Gastrointestinal disorders |
| Gastric hypomotility           | Gastrointestinal atonic and hypomotility disorders NEC      | Gastrointestinal motility and defaecation conditions  | Gastrointestinal disorders |
| Gastric hypermotility          | Gastrointestinal spastic and hypermotility disorders        | Gastrointestinal motility and defaecation conditions  | Gastrointestinal disorders |
| Palatal disorder               | Oral soft tissue disorders NEC                              | Oral soft tissue conditions                           | Gastrointestinal disorders |
| Palatal dysplasia              | Oral soft tissue disorders NEC                              | Oral soft tissue conditions                           | Gastrointestinal disorders |
| Oesophageal ulcer perforation  | Oesophageal ulcers and perforation                          | Gastrointestinal ulceration and perforation           | Gastrointestinal disorders |
| Abdominal rebound tenderness   | Gastrointestinal and abdominal pains (excl oral and throat) | Gastrointestinal signs and symptoms                   | Gastrointestinal disorders |



|                                    |                                                              |                                                       |                            |
|------------------------------------|--------------------------------------------------------------|-------------------------------------------------------|----------------------------|
| Large intestinal ulcer perforation | Intestinal ulcers and perforation NEC                        | Gastrointestinal ulceration and perforation           | Gastrointestinal disorders |
| Small intestinal ulcer perforation | Intestinal ulcers and perforation NEC                        | Gastrointestinal ulceration and perforation           | Gastrointestinal disorders |
| Large intestinal haemorrhage       | Intestinal haemorrhages                                      | Gastrointestinal haemorrhages NEC                     | Gastrointestinal disorders |
| Small intestinal haemorrhage       | Intestinal haemorrhages                                      | Gastrointestinal haemorrhages NEC                     | Gastrointestinal disorders |
| Gastric volvulus                   | Gastric and pyloric stenosis and obstruction                 | Gastrointestinal stenosis and obstruction             | Gastrointestinal disorders |
| Pancreatic duct obstruction        | Pancreatic disorders NEC                                     | Exocrine pancreas conditions                          | Gastrointestinal disorders |
| Aerophagia                         | Flatulence, bloating and distension                          | Gastrointestinal signs and symptoms                   | Gastrointestinal disorders |
| Acquired oesophageal web           | Oesophageal stenosis and obstruction                         | Gastrointestinal stenosis and obstruction             | Gastrointestinal disorders |
| Oral pruritus                      | Oral soft tissue signs and symptoms                          | Oral soft tissue conditions                           | Gastrointestinal disorders |
| Epigastric discomfort              | Dyspeptic signs and symptoms                                 | Gastrointestinal signs and symptoms                   | Gastrointestinal disorders |
| Abdominal strangulated hernia      | Abdominal hernias, site unspecified                          | Abdominal hernias and other abdominal wall conditions | Gastrointestinal disorders |
| Colitis psychogenic                | Colitis (excl infective)                                     | Gastrointestinal inflammatory conditions              | Gastrointestinal disorders |
| Oesophageal discomfort             | Gastrointestinal signs and symptoms NEC                      | Gastrointestinal signs and symptoms                   | Gastrointestinal disorders |
| Gastroduodenal haemorrhage         | Gastric and oesophageal haemorrhages                         | Gastrointestinal haemorrhages NEC                     | Gastrointestinal disorders |
| Dental discomfort                  | Dental pain and sensation disorders                          | Dental and gingival conditions                        | Gastrointestinal disorders |
| Haemorrhoidal haemorrhage          | Haemorrhoids and gastrointestinal varices (excl oesophageal) | Gastrointestinal vascular conditions                  | Gastrointestinal disorders |
| Diverticular hernia                | Abdominal cavity hernias NEC                                 | Abdominal hernias and other abdominal wall conditions | Gastrointestinal disorders |
| Peritoneal lesion                  | Peritoneal and retroperitoneal disorders                     | Peritoneal and retroperitoneal conditions             | Gastrointestinal disorders |
| Rectal lesion                      | Anal and rectal disorders NEC                                | Anal and rectal conditions NEC                        | Gastrointestinal disorders |
| Gingival cyst                      | Gingival disorders NEC                                       | Dental and gingival conditions                        | Gastrointestinal disorders |

|                                        |                                                           |                                             |                            |
|----------------------------------------|-----------------------------------------------------------|---------------------------------------------|----------------------------|
| Pancreatic enlargement                 | Pancreatic disorders NEC                                  | Exocrine pancreas conditions                | Gastrointestinal disorders |
| Tongue atrophy                         | Tongue disorders                                          | Tongue conditions                           | Gastrointestinal disorders |
| Painful defaecation                    | Anal and rectal pains                                     | Anal and rectal conditions NEC              | Gastrointestinal disorders |
| Necrotising enterocolitis neonatal     | Gastrointestinal inflammatory disorders NEC               | Gastrointestinal inflammatory conditions    | Gastrointestinal disorders |
| Necrotising oesophagitis               | Oesophageal ulcers and perforation                        | Gastrointestinal ulceration and perforation | Gastrointestinal disorders |
| Varices oesophageal                    | Oesophageal varices                                       | Gastrointestinal vascular conditions        | Gastrointestinal disorders |
| Perianal erythema                      | Anal and rectal signs and symptoms                        | Anal and rectal conditions NEC              | Gastrointestinal disorders |
| Faecaloma                              | Faecal abnormalities NEC                                  | Gastrointestinal signs and symptoms         | Gastrointestinal disorders |
| Distal intestinal obstruction syndrome | Gastrointestinal stenosis and obstruction NEC             | Gastrointestinal stenosis and obstruction   | Gastrointestinal disorders |
| Anal trichiasis                        | Anal and rectal disorders NEC                             | Anal and rectal conditions NEC              | Gastrointestinal disorders |
| Dolichocolon acquired                  | Large intestinal stenosis and obstruction                 | Gastrointestinal stenosis and obstruction   | Gastrointestinal disorders |
| Salivary duct inflammation             | Salivary gland infections and inflammations               | Salivary gland conditions                   | Gastrointestinal disorders |
| Diabetic enteropathy                   | Gastrointestinal disorders NEC                            | Gastrointestinal conditions NEC             | Gastrointestinal disorders |
| Diabetic gastroenteropathy             | Gastrointestinal disorders NEC                            | Gastrointestinal conditions NEC             | Gastrointestinal disorders |
| Gastrointestinal ulcer haemorrhage     | Gastrointestinal ulcers and perforation, site unspecified | Gastrointestinal ulceration and perforation | Gastrointestinal disorders |
| Gastric disorder                       | Gastrointestinal disorders NEC                            | Gastrointestinal conditions NEC             | Gastrointestinal disorders |
| Pancreatic phlegmon                    | Acute and chronic pancreatitis                            | Exocrine pancreas conditions                | Gastrointestinal disorders |
| Alcoholic pancreatitis                 | Acute and chronic pancreatitis                            | Exocrine pancreas conditions                | Gastrointestinal disorders |
| Gastric cyst                           | Benign neoplasms gastrointestinal (excl oral cavity)      | Benign neoplasms gastrointestinal           | Gastrointestinal disorders |
| Colitis microscopic                    | Colitis (excl infective)                                  | Gastrointestinal inflammatory conditions    | Gastrointestinal disorders |

|                                             |                                                              |                                                      |                            |
|---------------------------------------------|--------------------------------------------------------------|------------------------------------------------------|----------------------------|
| Dental plaque                               | Dental surface disorders                                     | Dental and gingival conditions                       | Gastrointestinal disorders |
| Faecalith                                   | Faecal abnormalities NEC                                     | Gastrointestinal signs and symptoms                  | Gastrointestinal disorders |
| Intestinal prolapse                         | Gastrointestinal disorders NEC                               | Gastrointestinal conditions NEC                      | Gastrointestinal disorders |
| Enterocolonic fistula                       | Gastrointestinal fistulae                                    | Gastrointestinal conditions NEC                      | Gastrointestinal disorders |
| Brunner's gland hyperplasia                 | Gastrointestinal mucosal dystrophies and secretion disorders | Gastrointestinal conditions NEC                      | Gastrointestinal disorders |
| Gastrointestinal mucosal disorder           | Gastrointestinal mucosal dystrophies and secretion disorders | Gastrointestinal conditions NEC                      | Gastrointestinal disorders |
| Palatal oedema                              | Oral soft tissue swelling and oedema                         | Oral soft tissue conditions                          | Gastrointestinal disorders |
| Salivary gland mass                         | Salivary gland disorders NEC                                 | Salivary gland conditions                            | Gastrointestinal disorders |
| Oesophageal mass                            | Oesophageal disorders NEC                                    | Gastrointestinal conditions NEC                      | Gastrointestinal disorders |
| Rectal spasm                                | Anal and rectal signs and symptoms                           | Anal and rectal conditions NEC                       | Gastrointestinal disorders |
| Pneumatosis intestinalis                    | Gastrointestinal signs and symptoms NEC                      | Gastrointestinal signs and symptoms                  | Gastrointestinal disorders |
| Rectal tenesmus                             | Anal and rectal signs and symptoms                           | Anal and rectal conditions NEC                       | Gastrointestinal disorders |
| Meconium plug syndrome                      | Duodenal and small intestinal stenosis and obstruction       | Gastrointestinal stenosis and obstruction            | Gastrointestinal disorders |
| Colonic pseudo-obstruction                  | Gastrointestinal atonic and hypomotility disorders NEC       | Gastrointestinal motility and defaecation conditions | Gastrointestinal disorders |
| Gastrointestinal tract mucosal pigmentation | Gastrointestinal mucosal dystrophies and secretion disorders | Gastrointestinal conditions NEC                      | Gastrointestinal disorders |
| Pylorus dilatation                          | Gastrointestinal disorders NEC                               | Gastrointestinal conditions NEC                      | Gastrointestinal disorders |
| Eosinophilic colitis                        | Colitis (excl infective)                                     | Gastrointestinal inflammatory conditions             | Gastrointestinal disorders |
| Oral leukoedema                             | Oral soft tissue disorders NEC                               | Oral soft tissue conditions                          | Gastrointestinal disorders |
| Hypoaesthesia oral                          | Oral soft tissue signs and symptoms                          | Oral soft tissue conditions                          | Gastrointestinal disorders |
| Paraesthesia oral                           | Oral soft tissue pain and paraesthesia                       | Oral soft tissue conditions                          | Gastrointestinal disorders |

|                                      |                                                        |                                                       |                            |
|--------------------------------------|--------------------------------------------------------|-------------------------------------------------------|----------------------------|
| Hernial eventration                  | Abdominal hernias, site unspecified                    | Abdominal hernias and other abdominal wall conditions | Gastrointestinal disorders |
| Gastric varices haemorrhage          | Gastric and oesophageal haemorrhages                   | Gastrointestinal haemorrhages NEC                     | Gastrointestinal disorders |
| Sclerosing encapsulating peritonitis | Peritoneal and retroperitoneal fibrosis and adhesions  | Peritoneal and retroperitoneal conditions             | Gastrointestinal disorders |
| Reflux gastritis                     | Gastritis (excl infective)                             | Gastrointestinal inflammatory conditions              | Gastrointestinal disorders |
| Epulis                               | Gingival disorders NEC                                 | Dental and gingival conditions                        | Gastrointestinal disorders |
| Appendiceal mucocoele                | Gastrointestinal disorders NEC                         | Gastrointestinal conditions NEC                       | Gastrointestinal disorders |
| Gastric ileus                        | Gastric and pyloric stenosis and obstruction           | Gastrointestinal stenosis and obstruction             | Gastrointestinal disorders |
| Gastrointestinal oedema              | Gastrointestinal disorders NEC                         | Gastrointestinal conditions NEC                       | Gastrointestinal disorders |
| Peritoneal haematoma                 | Peritoneal and retroperitoneal haemorrhages            | Peritoneal and retroperitoneal conditions             | Gastrointestinal disorders |
| Pancreatic necrosis                  | Pancreatic disorders NEC                               | Exocrine pancreas conditions                          | Gastrointestinal disorders |
| Meconium peritonitis                 | Peritoneal and retroperitoneal disorders               | Peritoneal and retroperitoneal conditions             | Gastrointestinal disorders |
| Colitis erosive                      | Colitis (excl infective)                               | Gastrointestinal inflammatory conditions              | Gastrointestinal disorders |
| Retroperitoneal haematoma            | Peritoneal and retroperitoneal haemorrhages            | Peritoneal and retroperitoneal conditions             | Gastrointestinal disorders |
| Stomach granuloma                    | Gastric and gastroenteric infections                   | Gastrointestinal infections                           | Gastrointestinal disorders |
| Hypertrophic anal papilla            | Anal and rectal disorders NEC                          | Anal and rectal conditions NEC                        | Gastrointestinal disorders |
| Oral toxicity                        | Oral soft tissue disorders NEC                         | Oral soft tissue conditions                           | Gastrointestinal disorders |
| Abdominal compartment syndrome       | Gastrointestinal disorders NEC                         | Gastrointestinal conditions NEC                       | Gastrointestinal disorders |
| Acquired macroglossia                | Tongue disorders                                       | Tongue conditions                                     | Gastrointestinal disorders |
| Neonatal intestinal dilatation       | Gastrointestinal atonic and hypomotility disorders NEC | Gastrointestinal motility and defaecation conditions  | Gastrointestinal disorders |
| Acetonaemic vomiting                 | Nausea and vomiting symptoms                           | Gastrointestinal signs and symptoms                   | Gastrointestinal disorders |

|                                  |                                                              |                                                       |                            |
|----------------------------------|--------------------------------------------------------------|-------------------------------------------------------|----------------------------|
| Intestinal mass                  | Gastrointestinal disorders NEC                               | Gastrointestinal conditions NEC                       | Gastrointestinal disorders |
| Gastrointestinal toxicity        | Gastrointestinal inflammatory disorders NEC                  | Gastrointestinal inflammatory conditions              | Gastrointestinal disorders |
| Gastrointestinal ischaemia       | Gastrointestinal vascular occlusion and infarction           | Gastrointestinal vascular conditions                  | Gastrointestinal disorders |
| Glossoptosis                     | Tongue signs and symptoms                                    | Tongue conditions                                     | Gastrointestinal disorders |
| Infrequent bowel movements       | Gastrointestinal atonic and hypomotility disorders NEC       | Gastrointestinal motility and defaecation conditions  | Gastrointestinal disorders |
| Intestinal haemorrhage           | Intestinal haemorrhages                                      | Gastrointestinal haemorrhages NEC                     | Gastrointestinal disorders |
| Poor dental condition            | Dental disorders NEC                                         | Dental and gingival conditions                        | Gastrointestinal disorders |
| Auriculotemporal syndrome        | Salivary gland disorders NEC                                 | Salivary gland conditions                             | Gastrointestinal disorders |
| Gastrointestinal amyloidosis     | Gastrointestinal disorders NEC                               | Gastrointestinal conditions NEC                       | Gastrointestinal disorders |
| Protein-losing gastroenteropathy | Gastrointestinal disorders NEC                               | Gastrointestinal conditions NEC                       | Gastrointestinal disorders |
| Allergic colitis                 | Colitis (excl infective)                                     | Gastrointestinal inflammatory conditions              | Gastrointestinal disorders |
| Abdominal wall disorder          | Abdominal wall conditions NEC                                | Abdominal hernias and other abdominal wall conditions | Gastrointestinal disorders |
| Haemorrhagic ascites             | Peritoneal and retroperitoneal haemorrhages                  | Peritoneal and retroperitoneal conditions             | Gastrointestinal disorders |
| Hypergastrinaemia                | Gastrointestinal mucosal dystrophies and secretion disorders | Gastrointestinal conditions NEC                       | Gastrointestinal disorders |
| Presbyoesophagus                 | Gastrointestinal dyskinetic disorders                        | Gastrointestinal motility and defaecation conditions  | Gastrointestinal disorders |
| Gastrointestinal erosion         | Gastrointestinal ulcers and perforation, site unspecified    | Gastrointestinal ulceration and perforation           | Gastrointestinal disorders |
| Mesenteric haemorrhage           | Intestinal haemorrhages                                      | Gastrointestinal haemorrhages NEC                     | Gastrointestinal disorders |
| Duodenogastric reflux            | Gastrointestinal atonic and hypomotility disorders NEC       | Gastrointestinal motility and defaecation conditions  | Gastrointestinal disorders |
| Salivary gland mucocoele         | Salivary gland disorders NEC                                 | Salivary gland conditions                             | Gastrointestinal disorders |
| Abdominal hernia obstructive     | Abdominal hernias, site unspecified                          | Abdominal hernias and other abdominal wall conditions | Gastrointestinal disorders |

|                                    |                                                              |                                                       |                            |
|------------------------------------|--------------------------------------------------------------|-------------------------------------------------------|----------------------------|
| Abdominal symptom                  | Gastrointestinal signs and symptoms NEC                      | Gastrointestinal signs and symptoms                   | Gastrointestinal disorders |
| Abdominal hernia                   | Abdominal hernias, site unspecified                          | Abdominal hernias and other abdominal wall conditions | Gastrointestinal disorders |
| Appendix disorder                  | Gastrointestinal disorders NEC                               | Gastrointestinal conditions NEC                       | Gastrointestinal disorders |
| Apical granuloma                   | Dental and periodontal infections and inflammations          | Dental and gingival conditions                        | Gastrointestinal disorders |
| Gastric mucosal lesion             | Gastrointestinal mucosal dystrophies and secretion disorders | Gastrointestinal conditions NEC                       | Gastrointestinal disorders |
| Gastrointestinal motility disorder | Gastrointestinal dyskinetic disorders                        | Gastrointestinal motility and defaecation conditions  | Gastrointestinal disorders |
| Intestinal ulcer perforation       | Intestinal ulcers and perforation NEC                        | Gastrointestinal ulceration and perforation           | Gastrointestinal disorders |
| Intra-abdominal haemorrhage        | Non-site specific gastrointestinal haemorrhages              | Gastrointestinal haemorrhages NEC                     | Gastrointestinal disorders |
| Large intestinal ulcer haemorrhage | Intestinal ulcers and perforation NEC                        | Gastrointestinal ulceration and perforation           | Gastrointestinal disorders |
| Malocclusion                       | Dental disorders NEC                                         | Dental and gingival conditions                        | Gastrointestinal disorders |
| Oesophageal disorder               | Oesophageal disorders NEC                                    | Gastrointestinal conditions NEC                       | Gastrointestinal disorders |
| Peritoneal disorder                | Peritoneal and retroperitoneal disorders                     | Peritoneal and retroperitoneal conditions             | Gastrointestinal disorders |
| Gastrointestinal ulcer             | Gastrointestinal ulcers and perforation, site unspecified    | Gastrointestinal ulceration and perforation           | Gastrointestinal disorders |
| Small intestinal ulcer haemorrhage | Intestinal ulcers and perforation NEC                        | Gastrointestinal ulceration and perforation           | Gastrointestinal disorders |
| Diverticular perforation           | Gastrointestinal ulcers and perforation, site unspecified    | Gastrointestinal ulceration and perforation           | Gastrointestinal disorders |
| Salivary gland disorder            | Salivary gland disorders NEC                                 | Salivary gland conditions                             | Gastrointestinal disorders |
| Gastric stenosis                   | Gastric and pyloric stenosis and obstruction                 | Gastrointestinal stenosis and obstruction             | Gastrointestinal disorders |
| Gastrointestinal obstruction       | Gastrointestinal stenosis and obstruction NEC                | Gastrointestinal stenosis and obstruction             | Gastrointestinal disorders |
| Gastrointestinal ulcer perforation | Gastrointestinal ulcers and perforation, site unspecified    | Gastrointestinal ulceration and perforation           | Gastrointestinal disorders |
| Intestinal cyst                    | Benign neoplasms gastrointestinal (excl oral cavity)         | Benign neoplasms gastrointestinal                     | Gastrointestinal disorders |

|                                          |                                                        |                                                          |                            |
|------------------------------------------|--------------------------------------------------------|----------------------------------------------------------|----------------------------|
| Large intestinal obstruction             | Large intestinal stenosis and obstruction              | Gastrointestinal stenosis and obstruction                | Gastrointestinal disorders |
| Small intestinal stenosis                | Duodenal and small intestinal stenosis and obstruction | Gastrointestinal stenosis and obstruction                | Gastrointestinal disorders |
| Truncus coeliacus thrombosis             | Gastrointestinal vascular occlusion and infarction     | Gastrointestinal vascular conditions                     | Gastrointestinal disorders |
| Erosive duodenitis                       | Duodenal ulcers and perforation                        | Gastrointestinal ulceration and perforation              | Gastrointestinal disorders |
| Enterovesical fistula                    | Gastrointestinal fistulae                              | Gastrointestinal conditions NEC                          | Gastrointestinal disorders |
| Gastroesophageal sphincter insufficiency | Gastrointestinal atonic and hypomotility disorders NEC | Gastrointestinal motility and defaecation conditions     | Gastrointestinal disorders |
| Gastrolithiasis                          | Gastrointestinal disorders NEC                         | Gastrointestinal conditions NEC                          | Gastrointestinal disorders |
| Peritonitis lupus                        | Peritoneal and retroperitoneal disorders               | Peritoneal and retroperitoneal conditions                | Gastrointestinal disorders |
| Cronkhite-Canada syndrome                | Gastrointestinal neoplasms NEC                         | Malignant and unspecified neoplasms gastrointestinal NEC | Gastrointestinal disorders |
| Gastric hypertonia                       | Gastrointestinal spastic and hypermotility disorders   | Gastrointestinal motility and defaecation conditions     | Gastrointestinal disorders |
| Cyclic vomiting syndrome                 | Nausea and vomiting symptoms                           | Gastrointestinal signs and symptoms                      | Gastrointestinal disorders |
| Oral mucosal hypertrophy                 | Oral soft tissue disorders NEC                         | Oral soft tissue conditions                              | Gastrointestinal disorders |
| Neutropenic colitis                      | Colitis (excl infective)                               | Gastrointestinal inflammatory conditions                 | Gastrointestinal disorders |
| Abdominal wall mass                      | Abdominal wall conditions NEC                          | Abdominal hernias and other abdominal wall conditions    | Gastrointestinal disorders |
| Mesenteric panniculitis                  | Gastrointestinal inflammatory disorders NEC            | Gastrointestinal inflammatory conditions                 | Gastrointestinal disorders |
| Appendicitis noninfective                | Gastrointestinal inflammatory disorders NEC            | Gastrointestinal inflammatory conditions                 | Gastrointestinal disorders |
| Infantile spitting up                    | Nausea and vomiting symptoms                           | Gastrointestinal signs and symptoms                      | Gastrointestinal disorders |
| Bowel movement irregularity              | Gastrointestinal dyskinetic disorders                  | Gastrointestinal motility and defaecation conditions     | Gastrointestinal disorders |
| Retroperitoneal effusion                 | Peritoneal and retroperitoneal disorders               | Peritoneal and retroperitoneal conditions                | Gastrointestinal disorders |
| Erosive oesophagitis                     | Oesophageal ulcers and perforation                     | Gastrointestinal ulceration and perforation              | Gastrointestinal disorders |

|                               |                                               |                                             |                            |
|-------------------------------|-----------------------------------------------|---------------------------------------------|----------------------------|
| Intestinal strangulation      | Gastrointestinal stenosis and obstruction NEC | Gastrointestinal stenosis and obstruction   | Gastrointestinal disorders |
| Uraemic gastropathy           | Gastrointestinal disorders NEC                | Gastrointestinal conditions NEC             | Gastrointestinal disorders |
| Visceroptosis                 | Peritoneal and retroperitoneal disorders      | Peritoneal and retroperitoneal conditions   | Gastrointestinal disorders |
| Anal ulcer haemorrhage        | Anal and rectal ulcers and perforation        | Gastrointestinal ulceration and perforation | Gastrointestinal disorders |
| Pelvic floor dyssynergia      | Anal and rectal signs and symptoms            | Anal and rectal conditions NEC              | Gastrointestinal disorders |
| Gastrointestinal inflammation | Gastrointestinal inflammatory disorders NEC   | Gastrointestinal inflammatory conditions    | Gastrointestinal disorders |
| Eosinophilic oesophagitis     | Oesophagitis (excl infective)                 | Gastrointestinal inflammatory conditions    | Gastrointestinal disorders |
| Angina bullosa haemorrhagica  | Oral soft tissue disorders NEC                | Oral soft tissue conditions                 | Gastrointestinal disorders |
| Epiploic appendagitis         | Gastrointestinal inflammatory disorders NEC   | Gastrointestinal inflammatory conditions    | Gastrointestinal disorders |
| Douglas' pouch mass           | Peritoneal and retroperitoneal disorders      | Peritoneal and retroperitoneal conditions   | Gastrointestinal disorders |
| Oesophageal oedema            | Oesophageal disorders NEC                     | Gastrointestinal conditions NEC             | Gastrointestinal disorders |
| Dysbacteriosis                | Gastrointestinal disorders NEC                | Gastrointestinal conditions NEC             | Gastrointestinal disorders |
| Lip exfoliation               | Oral soft tissue signs and symptoms           | Oral soft tissue conditions                 | Gastrointestinal disorders |
| Oral mucosal exfoliation      | Oral soft tissue signs and symptoms           | Oral soft tissue conditions                 | Gastrointestinal disorders |
| Tongue exfoliation            | Tongue signs and symptoms                     | Tongue conditions                           | Gastrointestinal disorders |
| Oral mucosa erosion           | Stomatitis and ulceration                     | Oral soft tissue conditions                 | Gastrointestinal disorders |
| Peritoneal perforation        | Peritoneal and retroperitoneal disorders      | Peritoneal and retroperitoneal conditions   | Gastrointestinal disorders |
| Faecal vomiting               | Nausea and vomiting symptoms                  | Gastrointestinal signs and symptoms         | Gastrointestinal disorders |
| Portal venous gas             | Gastrointestinal signs and symptoms NEC       | Gastrointestinal signs and symptoms         | Gastrointestinal disorders |
| Intestinal diaphragm disease  | Gastrointestinal stenosis and obstruction NEC | Gastrointestinal stenosis and obstruction   | Gastrointestinal disorders |



|                                 |                                                        |                                           |                            |
|---------------------------------|--------------------------------------------------------|-------------------------------------------|----------------------------|
| Creatorrhoea                    | Malabsorption syndromes                                | Malabsorption conditions                  | Gastrointestinal disorders |
| Pancreatic duct dilatation      | Pancreatic disorders NEC                               | Exocrine pancreas conditions              | Gastrointestinal disorders |
| Gastrointestinal telangiectasia | Gastrointestinal vascular malformations                | Gastrointestinal vascular conditions      | Gastrointestinal disorders |
| Tooth socket haemorrhage        | Dental disorders NEC                                   | Dental and gingival conditions            | Gastrointestinal disorders |
| Rectal fissure                  | Anal and rectal disorders NEC                          | Anal and rectal conditions NEC            | Gastrointestinal disorders |
| Oroantral fistula               | Gastrointestinal fistulae                              | Gastrointestinal conditions NEC           | Gastrointestinal disorders |
| Anal prolapse                   | Anal and rectal disorders NEC                          | Anal and rectal conditions NEC            | Gastrointestinal disorders |
| Mesenteric arteriosclerosis     | Gastrointestinal vascular occlusion and infarction     | Gastrointestinal vascular conditions      | Gastrointestinal disorders |
| Oesophageal food impaction      | Gastrointestinal signs and symptoms NEC                | Gastrointestinal signs and symptoms       | Gastrointestinal disorders |
| Intestinal congestion           | Gastrointestinal signs and symptoms NEC                | Gastrointestinal signs and symptoms       | Gastrointestinal disorders |
| Loose tooth                     | Dental disorders NEC                                   | Dental and gingival conditions            | Gastrointestinal disorders |
| Volvulus of small bowel         | Duodenal and small intestinal stenosis and obstruction | Gastrointestinal stenosis and obstruction | Gastrointestinal disorders |
| Pancreatic duct stenosis        | Pancreatic disorders NEC                               | Exocrine pancreas conditions              | Gastrointestinal disorders |
| Peritoneal necrosis             | Peritoneal and retroperitoneal disorders               | Peritoneal and retroperitoneal conditions | Gastrointestinal disorders |
| Rectal obstruction              | Anal and rectal stenosis and obstruction               | Gastrointestinal stenosis and obstruction | Gastrointestinal disorders |
| Gastric fistula                 | Gastrointestinal fistulae                              | Gastrointestinal conditions NEC           | Gastrointestinal disorders |
| Jejunal fistula                 | Gastrointestinal fistulae                              | Gastrointestinal conditions NEC           | Gastrointestinal disorders |
| Oral cavity fistula             | Gastrointestinal fistulae                              | Gastrointestinal conditions NEC           | Gastrointestinal disorders |
| Ileal fistula                   | Gastrointestinal fistulae                              | Gastrointestinal conditions NEC           | Gastrointestinal disorders |
| Oesophageal fistula             | Gastrointestinal fistulae                              | Gastrointestinal conditions NEC           | Gastrointestinal disorders |

|                                           |                                                              |                                                       |                            |
|-------------------------------------------|--------------------------------------------------------------|-------------------------------------------------------|----------------------------|
| Tongue amyloidosis                        | Tongue disorders                                             | Tongue conditions                                     | Gastrointestinal disorders |
| Sialometaplasia                           | Salivary gland disorders NEC                                 | Salivary gland conditions                             | Gastrointestinal disorders |
| Ischaemic pancreatitis                    | Acute and chronic pancreatitis                               | Exocrine pancreas conditions                          | Gastrointestinal disorders |
| Oesophageal mucosal hyperplasia           | Gastrointestinal mucosal dystrophies and secretion disorders | Gastrointestinal conditions NEC                       | Gastrointestinal disorders |
| Sandifer's syndrome                       | Gastrointestinal atonic and hypomotility disorders NEC       | Gastrointestinal motility and defaecation conditions  | Gastrointestinal disorders |
| Enlarged uvula                            | Oral soft tissue disorders NEC                               | Oral soft tissue conditions                           | Gastrointestinal disorders |
| Post-tussive vomiting                     | Nausea and vomiting symptoms                                 | Gastrointestinal signs and symptoms                   | Gastrointestinal disorders |
| Lip haematoma                             | Oral soft tissue haemorrhages                                | Oral soft tissue conditions                           | Gastrointestinal disorders |
| Visceral congestion                       | Gastrointestinal disorders NEC                               | Gastrointestinal conditions NEC                       | Gastrointestinal disorders |
| Localised intraabdominal fluid collection | Peritoneal and retroperitoneal disorders                     | Peritoneal and retroperitoneal conditions             | Gastrointestinal disorders |
| Stomach mass                              | Gastrointestinal disorders NEC                               | Gastrointestinal conditions NEC                       | Gastrointestinal disorders |
| Aorto-oesophageal fistula                 | Gastrointestinal fistulae                                    | Gastrointestinal conditions NEC                       | Gastrointestinal disorders |
| Rectourethral fistula                     | Gastrointestinal fistulae                                    | Gastrointestinal conditions NEC                       | Gastrointestinal disorders |
| Anal sphincter hypertonia                 | Anal and rectal disorders NEC                                | Anal and rectal conditions NEC                        | Gastrointestinal disorders |
| Umbilical hernia perforation              | Umbilical hernias                                            | Abdominal hernias and other abdominal wall conditions | Gastrointestinal disorders |
| Peritoneal cloudy effluent                | Peritoneal and retroperitoneal disorders                     | Peritoneal and retroperitoneal conditions             | Gastrointestinal disorders |
| Gastropleural fistula                     | Gastrointestinal fistulae                                    | Gastrointestinal conditions NEC                       | Gastrointestinal disorders |
| Regurgitation                             | Nausea and vomiting symptoms                                 | Gastrointestinal signs and symptoms                   | Gastrointestinal disorders |
| Anal erosion                              | Anal and rectal ulcers and perforation                       | Gastrointestinal ulceration and perforation           | Gastrointestinal disorders |
| Coeliac artery stenosis                   | Gastrointestinal vascular occlusion and infarction           | Gastrointestinal vascular conditions                  | Gastrointestinal disorders |

|                                   |                                                              |                                                       |                            |
|-----------------------------------|--------------------------------------------------------------|-------------------------------------------------------|----------------------------|
| Hiatus hernia, obstructive        | Diaphragmatic hernias                                        | Abdominal hernias and other abdominal wall conditions | Gastrointestinal disorders |
| Tongue necrosis                   | Tongue disorders                                             | Tongue conditions                                     | Gastrointestinal disorders |
| Abdominal wall haematoma          | Abdominal wall conditions NEC                                | Abdominal hernias and other abdominal wall conditions | Gastrointestinal disorders |
| Oral mucosal erythema             | Oral soft tissue signs and symptoms                          | Oral soft tissue conditions                           | Gastrointestinal disorders |
| Gingival erythema                 | Gingival disorders NEC                                       | Dental and gingival conditions                        | Gastrointestinal disorders |
| Bloody peritoneal effluent        | Peritoneal and retroperitoneal haemorrhages                  | Peritoneal and retroperitoneal conditions             | Gastrointestinal disorders |
| Contact stomatitis                | Stomatitis and ulceration                                    | Oral soft tissue conditions                           | Gastrointestinal disorders |
| Glycogenic acanthosis             | Gastrointestinal mucosal dystrophies and secretion disorders | Gastrointestinal conditions NEC                       | Gastrointestinal disorders |
| Inguinal hernia strangulated      | Inguinal hernias                                             | Abdominal hernias and other abdominal wall conditions | Gastrointestinal disorders |
| Gastric xanthoma                  | Gastrointestinal disorders NEC                               | Gastrointestinal conditions NEC                       | Gastrointestinal disorders |
| Malignant dysphagia               | Gastrointestinal signs and symptoms NEC                      | Gastrointestinal signs and symptoms                   | Gastrointestinal disorders |
| Oral disorder                     | Oral soft tissue disorders NEC                               | Oral soft tissue conditions                           | Gastrointestinal disorders |
| Gastrointestinal sounds abnormal  | Abdominal findings abnormal                                  | Gastrointestinal signs and symptoms                   | Gastrointestinal disorders |
| Lupus enteritis                   | Gastrointestinal inflammatory disorders NEC                  | Gastrointestinal inflammatory conditions              | Gastrointestinal disorders |
| Dieulafoy's vascular malformation | Gastrointestinal vascular malformations                      | Gastrointestinal vascular conditions                  | Gastrointestinal disorders |
| Intestinal mucosal atrophy        | Gastrointestinal disorders NEC                               | Gastrointestinal conditions NEC                       | Gastrointestinal disorders |
| Lupus pancreatitis                | Acute and chronic pancreatitis                               | Exocrine pancreas conditions                          | Gastrointestinal disorders |
| Oesophageal hypomotility          | Gastrointestinal atonic and hypomotility disorders NEC       | Gastrointestinal motility and defaecation conditions  | Gastrointestinal disorders |
| Papilla of Vater stenosis         | Duodenal and small intestinal stenosis and obstruction       | Gastrointestinal stenosis and obstruction             | Gastrointestinal disorders |
| Malacoplakia gastrointestinal     | Gastrointestinal inflammatory disorders NEC                  | Gastrointestinal inflammatory conditions              | Gastrointestinal disorders |

|                                      |                                                              |                                                       |                            |
|--------------------------------------|--------------------------------------------------------------|-------------------------------------------------------|----------------------------|
| Haemorrhagic erosive gastritis       | Gastric ulcers and perforation                               | Gastrointestinal ulceration and perforation           | Gastrointestinal disorders |
| Abdominal wall haemorrhage           | Abdominal wall conditions NEC                                | Abdominal hernias and other abdominal wall conditions | Gastrointestinal disorders |
| Gastrointestinal mucosal exfoliation | Gastrointestinal disorders NEC                               | Gastrointestinal conditions NEC                       | Gastrointestinal disorders |
| Melanoplakia oral                    | Oral soft tissue disorders NEC                               | Oral soft tissue conditions                           | Gastrointestinal disorders |
| Burning mouth syndrome               | Oral soft tissue signs and symptoms                          | Oral soft tissue conditions                           | Gastrointestinal disorders |
| Anal pruritus                        | Anal and rectal signs and symptoms                           | Anal and rectal conditions NEC                        | Gastrointestinal disorders |
| Pancreatic infarction                | Pancreatic disorders NEC                                     | Exocrine pancreas conditions                          | Gastrointestinal disorders |
| Anorectal discomfort                 | Anal and rectal signs and symptoms                           | Anal and rectal conditions NEC                        | Gastrointestinal disorders |
| Anorectal squamous cell metaplasia   | Anal and rectal disorders NEC                                | Anal and rectal conditions NEC                        | Gastrointestinal disorders |
| Traumatic occlusion                  | Dental disorders NEC                                         | Dental and gingival conditions                        | Gastrointestinal disorders |
| Pneumoretroperitoneum                | Peritoneal and retroperitoneal disorders                     | Peritoneal and retroperitoneal conditions             | Gastrointestinal disorders |
| Levator syndrome                     | Anal and rectal pains                                        | Anal and rectal conditions NEC                        | Gastrointestinal disorders |
| Gastrosplenic fistula                | Gastrointestinal fistulae                                    | Gastrointestinal conditions NEC                       | Gastrointestinal disorders |
| Pancreatic calcification             | Pancreatic disorders NEC                                     | Exocrine pancreas conditions                          | Gastrointestinal disorders |
| Portal hypertensive enteropathy      | Intestinal haemorrhages                                      | Gastrointestinal haemorrhages NEC                     | Gastrointestinal disorders |
| Anorectal varices                    | Haemorrhoids and gastrointestinal varices (excl oesophageal) | Gastrointestinal vascular conditions                  | Gastrointestinal disorders |
| Anorectal varices haemorrhage        | Haemorrhoids and gastrointestinal varices (excl oesophageal) | Gastrointestinal vascular conditions                  | Gastrointestinal disorders |
| Intestinal steatosis                 | Gastrointestinal disorders NEC                               | Gastrointestinal conditions NEC                       | Gastrointestinal disorders |
| Autoimmune pancreatitis              | Acute and chronic pancreatitis                               | Exocrine pancreas conditions                          | Gastrointestinal disorders |
| Atrophic glossitis                   | Tongue disorders                                             | Tongue conditions                                     | Gastrointestinal disorders |

|                                        |                                                              |                                                       |                            |
|----------------------------------------|--------------------------------------------------------------|-------------------------------------------------------|----------------------------|
| Tongue pigmentation                    | Tongue signs and symptoms                                    | Tongue conditions                                     | Gastrointestinal disorders |
| Myochosis                              | Gastrointestinal signs and symptoms NEC                      | Gastrointestinal signs and symptoms                   | Gastrointestinal disorders |
| Ultrafiltration failure                | Peritoneal and retroperitoneal disorders                     | Peritoneal and retroperitoneal conditions             | Gastrointestinal disorders |
| Mesenteritis                           | Gastrointestinal inflammatory disorders NEC                  | Gastrointestinal inflammatory conditions              | Gastrointestinal disorders |
| Bile acid malabsorption                | Malabsorption syndromes                                      | Malabsorption conditions                              | Gastrointestinal disorders |
| Intestinal haematoma                   | Intestinal haemorrhages                                      | Gastrointestinal haemorrhages NEC                     | Gastrointestinal disorders |
| Omental infarction                     | Gastrointestinal vascular occlusion and infarction           | Gastrointestinal vascular conditions                  | Gastrointestinal disorders |
| Tongue pruritus                        | Tongue signs and symptoms                                    | Tongue conditions                                     | Gastrointestinal disorders |
| Tooth crowding                         | Dental disorders NEC                                         | Dental and gingival conditions                        | Gastrointestinal disorders |
| Gastrointestinal vascular malformation | Gastrointestinal vascular malformations                      | Gastrointestinal vascular conditions                  | Gastrointestinal disorders |
| Ischaemic gastritis                    | Gastritis (excl infective)                                   | Gastrointestinal inflammatory conditions              | Gastrointestinal disorders |
| Gastrocoele                            | Abdominal cavity hernias NEC                                 | Abdominal hernias and other abdominal wall conditions | Gastrointestinal disorders |
| Cemento osseous dysplasia              | Dental disorders NEC                                         | Dental and gingival conditions                        | Gastrointestinal disorders |
| Intrinsic factor deficiency            | Gastrointestinal mucosal dystrophies and secretion disorders | Gastrointestinal conditions NEC                       | Gastrointestinal disorders |
| Retained deciduous tooth               | Dental disorders NEC                                         | Dental and gingival conditions                        | Gastrointestinal disorders |
| Lip pruritus                           | Oral soft tissue signs and symptoms                          | Oral soft tissue conditions                           | Gastrointestinal disorders |
| Oesophageal irritation                 | Oesophagitis (excl infective)                                | Gastrointestinal inflammatory conditions              | Gastrointestinal disorders |
| Gastrointestinal tract irritation      | Gastrointestinal inflammatory disorders NEC                  | Gastrointestinal inflammatory conditions              | Gastrointestinal disorders |
| Nicotinic stomatitis                   | Stomatitis and ulceration                                    | Oral soft tissue conditions                           | Gastrointestinal disorders |
| Gastric mucosa erythema                | Gastrointestinal disorders NEC                               | Gastrointestinal conditions NEC                       | Gastrointestinal disorders |

|                                      |                                                              |                                                      |                            |
|--------------------------------------|--------------------------------------------------------------|------------------------------------------------------|----------------------------|
| Colon dysplasia                      | Gastrointestinal mucosal dystrophies and secretion disorders | Gastrointestinal conditions NEC                      | Gastrointestinal disorders |
| Traumatic tooth displacement         | Dental disorders NEC                                         | Dental and gingival conditions                       | Gastrointestinal disorders |
| Functional gastrointestinal disorder | Gastrointestinal disorders NEC                               | Gastrointestinal conditions NEC                      | Gastrointestinal disorders |
| Mastocytic enterocolitis             | Gastrointestinal inflammatory disorders NEC                  | Gastrointestinal inflammatory conditions             | Gastrointestinal disorders |
| Salivary gland induration            | Salivary gland disorders NEC                                 | Salivary gland conditions                            | Gastrointestinal disorders |
| Pancreatic cyst rupture              | Cystic pancreatic disorders                                  | Exocrine pancreas conditions                         | Gastrointestinal disorders |
| Intestinal varices                   | Haemorrhoids and gastrointestinal varices (excl oesophageal) | Gastrointestinal vascular conditions                 | Gastrointestinal disorders |
| Oesophageal atony                    | Gastrointestinal atonic and hypomotility disorders NEC       | Gastrointestinal motility and defaecation conditions | Gastrointestinal disorders |
| Mesenteric haematoma                 | Intestinal haemorrhages                                      | Gastrointestinal haemorrhages NEC                    | Gastrointestinal disorders |
| Noninfectious peritonitis            | Peritoneal and retroperitoneal disorders                     | Peritoneal and retroperitoneal conditions            | Gastrointestinal disorders |
| Retroperitoneal mass                 | Peritoneal and retroperitoneal disorders                     | Peritoneal and retroperitoneal conditions            | Gastrointestinal disorders |
| Oesophageal fibrosis                 | Oesophageal stenosis and obstruction                         | Gastrointestinal stenosis and obstruction            | Gastrointestinal disorders |
| Tooth pulp haemorrhage               | Dental pulp disorders                                        | Dental and gingival conditions                       | Gastrointestinal disorders |
| Oesophageal mucosa erythema          | Oesophageal disorders NEC                                    | Gastrointestinal conditions NEC                      | Gastrointestinal disorders |
| Varicose veins of abdominal wall     | Haemorrhoids and gastrointestinal varices (excl oesophageal) | Gastrointestinal vascular conditions                 | Gastrointestinal disorders |
| Narcotic bowel syndrome              | Non-mechanical ileus                                         | Gastrointestinal motility and defaecation conditions | Gastrointestinal disorders |
| Duodenal vascular ectasia            | Gastrointestinal vascular malformations                      | Gastrointestinal vascular conditions                 | Gastrointestinal disorders |
| Oesophageal mucosal dissection       | Oesophageal disorders NEC                                    | Gastrointestinal conditions NEC                      | Gastrointestinal disorders |
| Oesophageal motility disorder        | Gastrointestinal dyskinetic disorders                        | Gastrointestinal motility and defaecation conditions | Gastrointestinal disorders |
| Periodontal inflammation             | Dental and periodontal infections and inflammations          | Dental and gingival conditions                       | Gastrointestinal disorders |

|                                       |                                                              |                                                      |                            |
|---------------------------------------|--------------------------------------------------------------|------------------------------------------------------|----------------------------|
| Gingival inflammation                 | Gingival disorders NEC                                       | Dental and gingival conditions                       | Gastrointestinal disorders |
| Duodenal papillitis                   | Gastrointestinal inflammatory disorders NEC                  | Gastrointestinal inflammatory conditions             | Gastrointestinal disorders |
| Tooth demineralisation                | Dental disorders NEC                                         | Dental and gingival conditions                       | Gastrointestinal disorders |
| Pharyngo-oesophageal diverticulum     | Diverticula                                                  | Diverticular disorders                               | Gastrointestinal disorders |
| Pancreatic steatosis                  | Pancreatic disorders NEC                                     | Exocrine pancreas conditions                         | Gastrointestinal disorders |
| Peritoneal mesothelial hyperplasia    | Peritoneal and retroperitoneal disorders                     | Peritoneal and retroperitoneal conditions            | Gastrointestinal disorders |
| Intestinal fibrosis                   | Gastrointestinal stenosis and obstruction NEC                | Gastrointestinal stenosis and obstruction            | Gastrointestinal disorders |
| Intestinal smooth muscle hypertrophy  | Gastrointestinal disorders NEC                               | Gastrointestinal conditions NEC                      | Gastrointestinal disorders |
| Pyloric sphincter insufficiency       | Gastrointestinal atonic and hypomotility disorders NEC       | Gastrointestinal motility and defaecation conditions | Gastrointestinal disorders |
| Peripancreatic varices                | Haemorrhoids and gastrointestinal varices (excl oesophageal) | Gastrointestinal vascular conditions                 | Gastrointestinal disorders |
| Small intestine polyp                 | Benign neoplasms gastrointestinal (excl oral cavity)         | Benign neoplasms gastrointestinal                    | Gastrointestinal disorders |
| Anal paraesthesia                     | Anal and rectal signs and symptoms                           | Anal and rectal conditions NEC                       | Gastrointestinal disorders |
| Intestinal calcification              | Gastrointestinal signs and symptoms NEC                      | Gastrointestinal signs and symptoms                  | Gastrointestinal disorders |
| Large intestinal stenosis             | Large intestinal stenosis and obstruction                    | Gastrointestinal stenosis and obstruction            | Gastrointestinal disorders |
| Ischaemic enteritis                   | Gastrointestinal inflammatory disorders NEC                  | Gastrointestinal inflammatory conditions             | Gastrointestinal disorders |
| Pyostomatitis vegetans                | Stomatitis and ulceration                                    | Oral soft tissue conditions                          | Gastrointestinal disorders |
| Oesophageal compression               | Oesophageal stenosis and obstruction                         | Gastrointestinal stenosis and obstruction            | Gastrointestinal disorders |
| Biliary ascites                       | Peritoneal and retroperitoneal disorders                     | Peritoneal and retroperitoneal conditions            | Gastrointestinal disorders |
| Neonatal gastrointestinal haemorrhage | Non-site specific gastrointestinal haemorrhages              | Gastrointestinal haemorrhages NEC                    | Gastrointestinal disorders |
| Neonatal intestinal perforation       | Intestinal ulcers and perforation NEC                        | Gastrointestinal ulceration and perforation          | Gastrointestinal disorders |

|                                    |                                                              |                                                       |                            |
|------------------------------------|--------------------------------------------------------------|-------------------------------------------------------|----------------------------|
| Meconium cyst                      | Peritoneal and retroperitoneal disorders                     | Peritoneal and retroperitoneal conditions             | Gastrointestinal disorders |
| Fixed bowel loop                   | Gastrointestinal signs and symptoms NEC                      | Gastrointestinal signs and symptoms                   | Gastrointestinal disorders |
| Palatal swelling                   | Oral soft tissue swelling and oedema                         | Oral soft tissue conditions                           | Gastrointestinal disorders |
| Gastrointestinal polyp haemorrhage | Benign neoplasms gastrointestinal (excl oral cavity)         | Benign neoplasms gastrointestinal                     | Gastrointestinal disorders |
| Abdominal hernia perforation       | Abdominal hernias, site unspecified                          | Abdominal hernias and other abdominal wall conditions | Gastrointestinal disorders |
| Appendicolith                      | Gastrointestinal disorders NEC                               | Gastrointestinal conditions NEC                       | Gastrointestinal disorders |
| Mesenteric phleboscrosis           | Gastrointestinal vascular occlusion and infarction           | Gastrointestinal vascular conditions                  | Gastrointestinal disorders |
| Anorectal swelling                 | Anal and rectal signs and symptoms                           | Anal and rectal conditions NEC                        | Gastrointestinal disorders |
| Tongue infarction                  | Tongue disorders                                             | Tongue conditions                                     | Gastrointestinal disorders |
| Mesenteric vascular occlusion      | Gastrointestinal vascular occlusion and infarction           | Gastrointestinal vascular conditions                  | Gastrointestinal disorders |
| Scalloped tongue                   | Tongue signs and symptoms                                    | Tongue conditions                                     | Gastrointestinal disorders |
| Apoptotic colonopathy              | Gastrointestinal mucosal dystrophies and secretion disorders | Gastrointestinal conditions NEC                       | Gastrointestinal disorders |
| Richter's hernia                   | Abdominal hernias, site unspecified                          | Abdominal hernias and other abdominal wall conditions | Gastrointestinal disorders |
| Tongue polyp                       | Benign oral cavity neoplasms                                 | Benign neoplasms gastrointestinal                     | Gastrointestinal disorders |
| Oral mucosa haematoma              | Oral soft tissue haemorrhages                                | Oral soft tissue conditions                           | Gastrointestinal disorders |
| Gastric prolapse                   | Gastrointestinal disorders NEC                               | Gastrointestinal conditions NEC                       | Gastrointestinal disorders |
| Alveolar bone resorption           | Dental disorders NEC                                         | Dental and gingival conditions                        | Gastrointestinal disorders |
| Pancreatic fibrosis                | Pancreatic disorders NEC                                     | Exocrine pancreas conditions                          | Gastrointestinal disorders |
| Faeces soft                        | Faecal abnormalities NEC                                     | Gastrointestinal signs and symptoms                   | Gastrointestinal disorders |
| Noninfective gingivitis            | Gingival disorders NEC                                       | Dental and gingival conditions                        | Gastrointestinal disorders |



## 4.2 Allergic reactions

| Preferred term                   | High level term                                                  | High level group term                                              | System organ class                                   |
|----------------------------------|------------------------------------------------------------------|--------------------------------------------------------------------|------------------------------------------------------|
| Allergic myocarditis             | Noninfectious myocarditis                                        | Myocardial disorders                                               | Cardiac disorders                                    |
| Alveolitis allergic              | Lower respiratory tract inflammatory and immunologic conditions  | Lower respiratory tract disorders (excl obstruction and infection) | Respiratory, thoracic and mediastinal disorders      |
| Anaphylactic reaction            | Anaphylactic responses                                           | Allergic conditions                                                | Immune system disorders                              |
| Anaphylactic shock               | Anaphylactic responses                                           | Allergic conditions                                                | Immune system disorders                              |
| Anaphylactoid reaction           | Anaphylactic responses                                           | Allergic conditions                                                | Immune system disorders                              |
| Anaphylaxis treatment            | Therapeutic procedures NEC                                       | Therapeutic procedures and supportive care NEC                     | Surgical and medical procedures                      |
| Angioedema                       | Angioedemas                                                      | Angioedema and urticaria                                           | Skin and subcutaneous tissue disorders               |
| Application site dermatitis      | Application and instillation site reactions                      | Administration site reactions                                      | General disorders and administration site conditions |
| Application site rash            | Application and instillation site reactions                      | Administration site reactions                                      | General disorders and administration site conditions |
| Atopy                            | Atopic disorders                                                 | Allergic conditions                                                | Immune system disorders                              |
| Blepharitis allergic             | Lid, lash and lacrimal infections, irritations and inflammations | Ocular infections, irritations and inflammations                   | Eye disorders                                        |
| Blood immunoglobulin E abnormal  | Immunoglobulin analyses                                          | Immunology and allergy investigations                              | Investigations                                       |
| Blood immunoglobulin E increased | Immunoglobulin analyses                                          | Immunology and allergy investigations                              | Investigations                                       |
| Bromoderma                       | Dermatitis ascribed to specific agent                            | Epidermal and dermal conditions                                    | Skin and subcutaneous tissue disorders               |
| Bronchospasm                     | Bronchospasm and obstruction                                     | Bronchial disorders (excl neoplasms)                               | Respiratory, thoracic and mediastinal disorders      |
| Circulatory collapse             | Circulatory collapse and shock                                   | Decreased and nonspecific blood pressure disorders and shock       | Vascular disorders                                   |
| Conjunctival oedema              | Conjunctival infections, irritations and inflammations           | Ocular infections, irritations and inflammations                   | Eye disorders                                        |
| Conjunctivitis allergic          | Conjunctival infections, irritations and inflammations           | Ocular infections, irritations and inflammations                   | Eye disorders                                        |
| Contrast media reaction          | Non-site specific procedural complications                       | Procedural related injuries and complications NEC                  | Injury, poisoning and procedural complications       |
| Corneal oedema                   | Corneal infections, oedemas and inflammations                    | Ocular infections, irritations and inflammations                   | Eye disorders                                        |
| Cutaneous vasculitis             | Skin vasculitides                                                | Skin vascular abnormalities                                        | Skin and subcutaneous tissue disorders               |
| Dermatitis                       | Dermatitis and eczema                                            | Epidermal and dermal conditions                                    | Skin and subcutaneous tissue disorders               |
| Dermatitis acneiform             | Acnes                                                            | Skin appendage conditions                                          | Skin and subcutaneous tissue disorders               |
| Dermatitis allergic              | Dermatitis and eczema                                            | Epidermal and dermal conditions                                    | Skin and subcutaneous tissue disorders               |

|                                    |                                                                  |                                                     |                                                      |
|------------------------------------|------------------------------------------------------------------|-----------------------------------------------------|------------------------------------------------------|
| Dermatitis atopic                  | Dermatitis and eczema                                            | Epidermal and dermal conditions                     | Skin and subcutaneous tissue disorders               |
| Dermatitis bullous                 | Bullous conditions                                               | Epidermal and dermal conditions                     | Skin and subcutaneous tissue disorders               |
| Dermatitis contact                 | Dermatitis and eczema                                            | Epidermal and dermal conditions                     | Skin and subcutaneous tissue disorders               |
| Dermatitis exfoliative             | Exfoliative conditions                                           | Epidermal and dermal conditions                     | Skin and subcutaneous tissue disorders               |
| Dermatitis exfoliative generalised | Exfoliative conditions                                           | Epidermal and dermal conditions                     | Skin and subcutaneous tissue disorders               |
| Dermatitis herpetiformis           | Bullous conditions                                               | Epidermal and dermal conditions                     | Skin and subcutaneous tissue disorders               |
| Dermatitis infected                | Skin structures and soft tissue infections                       | Infections - pathogen unspecified                   | Infections and infestations                          |
| Drug eruption                      | Dermatitis ascribed to specific agent                            | Epidermal and dermal conditions                     | Skin and subcutaneous tissue disorders               |
| Drug hypersensitivity              | Allergies to foods, food additives, drugs and other chemicals    | Allergic conditions                                 | Immune system disorders                              |
| Eczema                             | Dermatitis and eczema                                            | Epidermal and dermal conditions                     | Skin and subcutaneous tissue disorders               |
| Eczema infantile                   | Dermatitis and eczema                                            | Epidermal and dermal conditions                     | Skin and subcutaneous tissue disorders               |
| Eczema nummular                    | Dermatitis and eczema                                            | Epidermal and dermal conditions                     | Skin and subcutaneous tissue disorders               |
| Encephalopathy allergic            | Encephalopathies NEC                                             | Encephalopathies                                    | Nervous system disorders                             |
| Epidermolysis bullosa              | Skin and subcutaneous tissue disorders congenital NEC            | Skin and subcutaneous tissue disorders congenital   | Congenital, familial and genetic disorders           |
| Epiglottic oedema                  | Laryngeal spasm, oedema and obstruction                          | Upper respiratory tract disorders (excl infections) | Respiratory, thoracic and mediastinal disorders      |
| Erythema multiforme                | Bullous conditions                                               | Epidermal and dermal conditions                     | Skin and subcutaneous tissue disorders               |
| Erythema nodosum                   | Panniculitides                                                   | Skin and subcutaneous tissue disorders NEC          | Skin and subcutaneous tissue disorders               |
| Eye allergy                        | Ocular infections, inflammations and associated manifestations   | Ocular infections, irritations and inflammations    | Eye disorders                                        |
| Eye swelling                       | Ocular disorders NEC                                             | Eye disorders NEC                                   | Eye disorders                                        |
| Eyelid oedema                      | Lid, lash and lacrimal infections, irritations and inflammations | Ocular infections, irritations and inflammations    | Eye disorders                                        |
| Face oedema                        | Oedema NEC                                                       | General system disorders NEC                        | General disorders and administration site conditions |
| Giant papillary conjunctivitis     | Conjunctival infections, irritations and inflammations           | Ocular infections, irritations and inflammations    | Eye disorders                                        |
| Gingival swelling                  | Oral soft tissue swelling and oedema                             | Oral soft tissue conditions                         | Gastrointestinal disorders                           |
| Henoch-Schonlein purpura           | Purpura and related conditions                                   | Skin vascular abnormalities                         | Skin and subcutaneous tissue disorders               |
| Hereditary angioedema              | Congenital disorders NEC                                         | Congenital and hereditary disorders NEC             | Congenital, familial and genetic disorders           |
| Hypersensitivity                   | Allergic conditions NEC                                          | Allergic conditions                                 | Immune system disorders                              |
| Hypersensitivity vasculitis        | Skin vasculitides                                                | Skin vascular abnormalities                         | Skin and subcutaneous tissue disorders               |

|                                   |                                                      |                                                     |                                                      |
|-----------------------------------|------------------------------------------------------|-----------------------------------------------------|------------------------------------------------------|
| Idiopathic urticaria              | Urticarias                                           | Angioedema and urticaria                            | Skin and subcutaneous tissue disorders               |
| Injection site dermatitis         | Injection site reactions                             | Administration site reactions                       | General disorders and administration site conditions |
| Injection site hypersensitivity   | Injection site reactions                             | Administration site reactions                       | General disorders and administration site conditions |
| Injection site rash               | Injection site reactions                             | Administration site reactions                       | General disorders and administration site conditions |
| Injection site urticaria          | Injection site reactions                             | Administration site reactions                       | General disorders and administration site conditions |
| Laryngeal oedema                  | Laryngeal spasm, oedema and obstruction              | Upper respiratory tract disorders (excl infections) | Respiratory, thoracic and mediastinal disorders      |
| Laryngospasm                      | Laryngeal spasm, oedema and obstruction              | Upper respiratory tract disorders (excl infections) | Respiratory, thoracic and mediastinal disorders      |
| Laryngotracheal oedema            | Laryngeal spasm, oedema and obstruction              | Upper respiratory tract disorders (excl infections) | Respiratory, thoracic and mediastinal disorders      |
| Lip oedema                        | Oral soft tissue swelling and oedema                 | Oral soft tissue conditions                         | Gastrointestinal disorders                           |
| Lip swelling                      | Oral soft tissue swelling and oedema                 | Oral soft tissue conditions                         | Gastrointestinal disorders                           |
| Multiple allergies                | Allergic conditions NEC                              | Allergic conditions                                 | Immune system disorders                              |
| Nephritis allergic                | Glomerulonephritis and nephrotic syndrome            | Nephropathies                                       | Renal and urinary disorders                          |
| Nikolsky's sign                   | Exfoliative conditions                               | Epidermal and dermal conditions                     | Skin and subcutaneous tissue disorders               |
| Oculomucocutaneous syndrome       | Bullous conditions                                   | Epidermal and dermal conditions                     | Skin and subcutaneous tissue disorders               |
| Oedema mouth                      | Oral soft tissue swelling and oedema                 | Oral soft tissue conditions                         | Gastrointestinal disorders                           |
| Oropharyngeal spasm               | Pharyngeal disorders (excl infections and neoplasms) | Upper respiratory tract disorders (excl infections) | Respiratory, thoracic and mediastinal disorders      |
| Oropharyngeal swelling            | Pharyngeal disorders (excl infections and neoplasms) | Upper respiratory tract disorders (excl infections) | Respiratory, thoracic and mediastinal disorders      |
| Periorbital oedema                | Ocular disorders NEC                                 | Eye disorders NEC                                   | Eye disorders                                        |
| Pharyngeal oedema                 | Pharyngeal disorders (excl infections and neoplasms) | Upper respiratory tract disorders (excl infections) | Respiratory, thoracic and mediastinal disorders      |
| Radioallergosorbent test positive | Immunoglobulin analyses                              | Immunology and allergy investigations               | Investigations                                       |
| Rash                              | Rashes, eruptions and exanths NEC                    | Epidermal and dermal conditions                     | Skin and subcutaneous tissue disorders               |
| Rash erythematous                 | Erythemas                                            | Epidermal and dermal conditions                     | Skin and subcutaneous tissue disorders               |
| Rash follicular                   | Pustular conditions                                  | Epidermal and dermal conditions                     | Skin and subcutaneous tissue disorders               |
| Rash generalised                  | Rashes, eruptions and exanths NEC                    | Epidermal and dermal conditions                     | Skin and subcutaneous tissue disorders               |
| Rash macular                      | Rashes, eruptions and exanths NEC                    | Epidermal and dermal conditions                     | Skin and subcutaneous tissue disorders               |
| Rash maculo-papular               | Rashes, eruptions and exanths NEC                    | Epidermal and dermal conditions                     | Skin and subcutaneous tissue disorders               |

|                              |                                                               |                                                                  |                                                 |
|------------------------------|---------------------------------------------------------------|------------------------------------------------------------------|-------------------------------------------------|
| Rash morbilliform            | Rashes, eruptions and exanths NEC                             | Epidermal and dermal conditions                                  | Skin and subcutaneous tissue disorders          |
| Rash neonatal                | Rashes, eruptions and exanths NEC                             | Epidermal and dermal conditions                                  | Skin and subcutaneous tissue disorders          |
| Rash papulosquamous          | Papulosquamous conditions                                     | Epidermal and dermal conditions                                  | Skin and subcutaneous tissue disorders          |
| Rash pruritic                | Pruritus NEC                                                  | Epidermal and dermal conditions                                  | Skin and subcutaneous tissue disorders          |
| Rash pustular                | Skin structures and soft tissue infections                    | Infections - pathogen unspecified                                | Infections and infestations                     |
| Rash scarlatiniform          | Rashes, eruptions and exanths NEC                             | Epidermal and dermal conditions                                  | Skin and subcutaneous tissue disorders          |
| Rash vesicular               | Rashes, eruptions and exanths NEC                             | Epidermal and dermal conditions                                  | Skin and subcutaneous tissue disorders          |
| Reaction to azo-dyes         | Allergies to foods, food additives, drugs and other chemicals | Allergic conditions                                              | Immune system disorders                         |
| Reaction to colouring        | Allergies to foods, food additives, drugs and other chemicals | Allergic conditions                                              | Immune system disorders                         |
| Red man syndrome             | Erythemas                                                     | Epidermal and dermal conditions                                  | Skin and subcutaneous tissue disorders          |
| Rhinitis allergic            | Nasal congestion and inflammations                            | Upper respiratory tract disorders (excl infections)              | Respiratory, thoracic and mediastinal disorders |
| Scrotal oedema               | Scrotal disorders NEC                                         | Penile and scrotal disorders (excl infections and inflammations) | Reproductive system and breast disorders        |
| Serum sickness               | Allergic conditions NEC                                       | Allergic conditions                                              | Immune system disorders                         |
| Serum sickness-like reaction | Allergic conditions NEC                                       | Allergic conditions                                              | Immune system disorders                         |
| Shock                        | Circulatory collapse and shock                                | Decreased and nonspecific blood pressure disorders and shock     | Vascular disorders                              |
| Skin necrosis                | Dermal and epidermal conditions NEC                           | Epidermal and dermal conditions                                  | Skin and subcutaneous tissue disorders          |
| Skin reaction                | Dermal and epidermal conditions NEC                           | Epidermal and dermal conditions                                  | Skin and subcutaneous tissue disorders          |
| Skin test positive           | Immunology skin tests NEC                                     | Immunology and allergy investigations                            | Investigations                                  |
| Solar urticaria              | Urticarias                                                    | Angioedema and urticaria                                         | Skin and subcutaneous tissue disorders          |
| Solvent sensitivity          | Allergies to foods, food additives, drugs and other chemicals | Allergic conditions                                              | Immune system disorders                         |
| Stevens-Johnson syndrome     | Bullous conditions                                            | Epidermal and dermal conditions                                  | Skin and subcutaneous tissue disorders          |
| Swelling face                | Angioedemas                                                   | Angioedema and urticaria                                         | Skin and subcutaneous tissue disorders          |
| Swollen tongue               | Tongue signs and symptoms                                     | Tongue conditions                                                | Gastrointestinal disorders                      |
| Tongue oedema                | Tongue signs and symptoms                                     | Tongue conditions                                                | Gastrointestinal disorders                      |
| Toxic epidermal necrolysis   | Bullous conditions                                            | Epidermal and dermal conditions                                  | Skin and subcutaneous tissue disorders          |
| Tracheal oedema              | Tracheal disorders (excl infections and neoplasms)            | Upper respiratory tract disorders (excl infections)              | Respiratory, thoracic and mediastinal disorders |
| Type I hypersensitivity      | Allergic conditions NEC                                       | Allergic conditions                                              | Immune system disorders                         |

|                                                          |                                                               |                                                            |                                                      |
|----------------------------------------------------------|---------------------------------------------------------------|------------------------------------------------------------|------------------------------------------------------|
| Urticaria                                                | Urticarias                                                    | Angioedema and urticaria                                   | Skin and subcutaneous tissue disorders               |
| Urticaria cholinergic                                    | Urticarias                                                    | Angioedema and urticaria                                   | Skin and subcutaneous tissue disorders               |
| Urticaria contact                                        | Urticarias                                                    | Angioedema and urticaria                                   | Skin and subcutaneous tissue disorders               |
| Urticaria papular                                        | Urticarias                                                    | Angioedema and urticaria                                   | Skin and subcutaneous tissue disorders               |
| Urticaria physical                                       | Urticarias                                                    | Angioedema and urticaria                                   | Skin and subcutaneous tissue disorders               |
| Urticaria pigmentosa                                     | Urticarias                                                    | Angioedema and urticaria                                   | Skin and subcutaneous tissue disorders               |
| Urticaria vesiculosa                                     | Urticarias                                                    | Angioedema and urticaria                                   | Skin and subcutaneous tissue disorders               |
| Vaginal ulceration                                       | Vulvovaginal disorders NEC                                    | Vulvovaginal disorders (excl infections and inflammations) | Reproductive system and breast disorders             |
| Vasculitic rash                                          | Skin vasculitides                                             | Skin vascular abnormalities                                | Skin and subcutaneous tissue disorders               |
| Vulval ulceration                                        | Vulvovaginal disorders NEC                                    | Vulvovaginal disorders (excl infections and inflammations) | Reproductive system and breast disorders             |
| Allergic granulomatous angiitis                          | Vasculitides                                                  | Immune disorders NEC                                       | Immune system disorders                              |
| Acute generalised exanthematous pustulosis               | Pustular conditions                                           | Epidermal and dermal conditions                            | Skin and subcutaneous tissue disorders               |
| Allergic sinusitis                                       | Paranasal sinus disorders (excl infections and neoplasms)     | Upper respiratory tract disorders (excl infections)        | Respiratory, thoracic and mediastinal disorders      |
| Gingival oedema                                          | Oral soft tissue swelling and oedema                          | Oral soft tissue conditions                                | Gastrointestinal disorders                           |
| Rash maculovesicular                                     | Rashes, eruptions and exanths NEC                             | Epidermal and dermal conditions                            | Skin and subcutaneous tissue disorders               |
| Application site eczema                                  | Application and instillation site reactions                   | Administration site reactions                              | General disorders and administration site conditions |
| Application site urticaria                               | Application and instillation site reactions                   | Administration site reactions                              | General disorders and administration site conditions |
| Vulvovaginal ulceration                                  | Vulvovaginal disorders NEC                                    | Vulvovaginal disorders (excl infections and inflammations) | Reproductive system and breast disorders             |
| Allergic pharyngitis                                     | Pharyngeal disorders (excl infections and neoplasms)          | Upper respiratory tract disorders (excl infections)        | Respiratory, thoracic and mediastinal disorders      |
| Anti-neutrophil cytoplasmic antibody positive vasculitis | Vasculitides                                                  | Immune disorders NEC                                       | Immune system disorders                              |
| Scleritis allergic                                       | Scleral infections, irritations and inflammations             | Ocular infections, irritations and inflammations           | Eye disorders                                        |
| Allergic cystitis                                        | Bladder infections and inflammations                          | Bladder and bladder neck disorders (excl calculi)          | Renal and urinary disorders                          |
| Small bowel angioedema                                   | Gastrointestinal inflammatory disorders NEC                   | Gastrointestinal inflammatory conditions                   | Gastrointestinal disorders                           |
| Kaposi's varicelliform eruption                          | Viral infections NEC                                          | Viral infectious disorders                                 | Infections and infestations                          |
| Iodine allergy                                           | Allergies to foods, food additives, drugs and other chemicals | Allergic conditions                                        | Immune system disorders                              |
| Eye oedema                                               | Ocular disorders NEC                                          | Eye disorders NEC                                          | Eye disorders                                        |

|                                           |                                                               |                                                     |                                                      |
|-------------------------------------------|---------------------------------------------------------------|-----------------------------------------------------|------------------------------------------------------|
| Circumoral oedema                         | Angioedemas                                                   | Angioedema and urticaria                            | Skin and subcutaneous tissue disorders               |
| Catheter site rash                        | Implant and catheter site reactions                           | Administration site reactions                       | General disorders and administration site conditions |
| Catheter site urticaria                   | Implant and catheter site reactions                           | Administration site reactions                       | General disorders and administration site conditions |
| Urticaria chronic                         | Urticarias                                                    | Angioedema and urticaria                            | Skin and subcutaneous tissue disorders               |
| Allergic bronchitis                       | Bronchial conditions NEC                                      | Bronchial disorders (excl neoplasms)                | Respiratory, thoracic and mediastinal disorders      |
| Epidermolysis                             | Skin and subcutaneous tissue disorders congenital NEC         | Skin and subcutaneous tissue disorders congenital   | Congenital, familial and genetic disorders           |
| Type IV hypersensitivity reaction         | Allergic conditions NEC                                       | Allergic conditions                                 | Immune system disorders                              |
| Type III immune complex mediated reaction | Allergic conditions NEC                                       | Allergic conditions                                 | Immune system disorders                              |
| Allergic cough                            | Coughing and associated symptoms                              | Respiratory disorders NEC                           | Respiratory, thoracic and mediastinal disorders      |
| Type II hypersensitivity                  | Allergic conditions NEC                                       | Allergic conditions                                 | Immune system disorders                              |
| Allergy to vaccine                        | Allergies to foods, food additives, drugs and other chemicals | Allergic conditions                                 | Immune system disorders                              |
| Eczema weeping                            | Dermatitis and eczema                                         | Epidermal and dermal conditions                     | Skin and subcutaneous tissue disorders               |
| Allergy test positive                     | Immunology analyses NEC                                       | Immunology and allergy investigations               | Investigations                                       |
| Encephalitis allergic                     | Encephalitis NEC                                              | Central nervous system infections and inflammations | Nervous system disorders                             |
| Mucocutaneous rash                        | Rashes, eruptions and exanths NEC                             | Epidermal and dermal conditions                     | Skin and subcutaneous tissue disorders               |
| Palpable purpura                          | Skin vasculitides                                             | Skin vascular abnormalities                         | Skin and subcutaneous tissue disorders               |
| Palatal oedema                            | Oral soft tissue swelling and oedema                          | Oral soft tissue conditions                         | Gastrointestinal disorders                           |
| Allergic keratitis                        | Corneal infections, oedemas and inflammations                 | Ocular infections, irritations and inflammations    | Eye disorders                                        |
| Scleral oedema                            | Scleral infections, irritations and inflammations             | Ocular infections, irritations and inflammations    | Eye disorders                                        |
| Toxic skin eruption                       | Dermatitis ascribed to specific agent                         | Epidermal and dermal conditions                     | Skin and subcutaneous tissue disorders               |
| Rash rubelliform                          | Rashes, eruptions and exanths NEC                             | Epidermal and dermal conditions                     | Skin and subcutaneous tissue disorders               |
| Dermatitis psoriasiform                   | Psoriatic conditions                                          | Epidermal and dermal conditions                     | Skin and subcutaneous tissue disorders               |
| Eczema vesicular                          | Dermatitis and eczema                                         | Epidermal and dermal conditions                     | Skin and subcutaneous tissue disorders               |
| Hand dermatitis                           | Dermatitis and eczema                                         | Epidermal and dermal conditions                     | Skin and subcutaneous tissue disorders               |
| Stoma site rash                           | Stoma complications                                           | Procedural related injuries and complications NEC   | Injury, poisoning and procedural complications       |
| Epidermal necrosis                        | Dermal and epidermal conditions NEC                           | Epidermal and dermal conditions                     | Skin and subcutaneous tissue disorders               |
| Allergic colitis                          | Colitis (excl infective)                                      | Gastrointestinal inflammatory conditions            | Gastrointestinal disorders                           |

|                                                  |                                                                            |                                                            |                                                      |
|--------------------------------------------------|----------------------------------------------------------------------------|------------------------------------------------------------|------------------------------------------------------|
| Haemorrhagic urticaria                           | Urticarias                                                                 | Angioedema and urticaria                                   | Skin and subcutaneous tissue disorders               |
| Infusion site rash                               | Infusion site reactions                                                    | Administration site reactions                              | General disorders and administration site conditions |
| Allergic oedema                                  | Allergic conditions NEC                                                    | Allergic conditions                                        | Immune system disorders                              |
| Arthritis allergic                               | Arthropathies NEC                                                          | Joint disorders                                            | Musculoskeletal and connective tissue disorders      |
| Allergic otitis media                            | Middle ear infections and inflammations                                    | Middle ear disorders (excl congenital)                     | Ear and labyrinth disorders                          |
| Heparin-induced thrombocytopenia                 | Thrombocytopenias                                                          | Platelet disorders                                         | Blood and lymphatic system disorders                 |
| Dennie-Morgan fold                               | Dermatitis and eczema                                                      | Epidermal and dermal conditions                            | Skin and subcutaneous tissue disorders               |
| Anaphylactoid shock                              | Anaphylactic responses                                                     | Allergic conditions                                        | Immune system disorders                              |
| Pruritus allergic                                | Pruritus NEC                                                               | Epidermal and dermal conditions                            | Skin and subcutaneous tissue disorders               |
| Allergic respiratory symptom                     | Respiratory signs and symptoms NEC                                         | Respiratory disorders NEC                                  | Respiratory, thoracic and mediastinal disorders      |
| Allergic respiratory disease                     | Respiratory tract disorders NEC                                            | Respiratory disorders NEC                                  | Respiratory, thoracic and mediastinal disorders      |
| Application site hypersensitivity                | Application and instillation site reactions                                | Administration site reactions                              | General disorders and administration site conditions |
| Implant site rash                                | Implant and catheter site reactions                                        | Administration site reactions                              | General disorders and administration site conditions |
| Implant site urticaria                           | Implant and catheter site reactions                                        | Administration site reactions                              | General disorders and administration site conditions |
| Implant site dermatitis                          | Implant and catheter site reactions                                        | Administration site reactions                              | General disorders and administration site conditions |
| Implant site hypersensitivity                    | Implant and catheter site reactions                                        | Administration site reactions                              | General disorders and administration site conditions |
| Antiallergic therapy                             | Therapeutic procedures NEC                                                 | Therapeutic procedures and supportive care NEC             | Surgical and medical procedures                      |
| Documented hypersensitivity to administered drug | Medication monitoring errors                                               | Medication errors                                          | Injury, poisoning and procedural complications       |
| Vaginal exfoliation                              | Vulvovaginal disorders NEC                                                 | Vulvovaginal disorders (excl infections and inflammations) | Reproductive system and breast disorders             |
| Exfoliative rash                                 | Exfoliative conditions                                                     | Epidermal and dermal conditions                            | Skin and subcutaneous tissue disorders               |
| Reaction to drug excipients                      | Allergies to foods, food additives, drugs and other chemicals              | Allergic conditions                                        | Immune system disorders                              |
| Reaction to preservatives                        | Allergies to foods, food additives, drugs and other chemicals              | Allergic conditions                                        | Immune system disorders                              |
| Laryngitis allergic                              | Laryngeal and adjacent sites disorders NEC (excl infections and neoplasms) | Upper respiratory tract disorders (excl infections)        | Respiratory, thoracic and mediastinal disorders      |
| Infusion site dermatitis                         | Infusion site reactions                                                    | Administration site reactions                              | General disorders and administration site conditions |
| Infusion site hypersensitivity                   | Infusion site reactions                                                    | Administration site reactions                              | General disorders and administration site conditions |

|                                       |                                                                |                                                              |                                                      |
|---------------------------------------|----------------------------------------------------------------|--------------------------------------------------------------|------------------------------------------------------|
| Infusion site urticaria               | Infusion site reactions                                        | Administration site reactions                                | General disorders and administration site conditions |
| Antiendomysial antibody positive      | Immunology analyses NEC                                        | Immunology and allergy investigations                        | Investigations                                       |
| Eczema vaccinatum                     | Orthopox viral infections                                      | Viral infectious disorders                                   | Infections and infestations                          |
| Allergic transfusion reaction         | Transfusion related complications                              | Procedural related injuries and complications NEC            | Injury, poisoning and procedural complications       |
| Gleich's syndrome                     | Angioedemas                                                    | Angioedema and urticaria                                     | Skin and subcutaneous tissue disorders               |
| Contrast media allergy                | Allergies to foods, food additives, drugs and other chemicals  | Allergic conditions                                          | Immune system disorders                              |
| Anaphylactic transfusion reaction     | Transfusion related complications                              | Procedural related injuries and complications NEC            | Injury, poisoning and procedural complications       |
| Immediate post-injection reaction     | Therapeutic and nontherapeutic responses                       | Therapeutic and nontherapeutic effects (excl toxicity)       | General disorders and administration site conditions |
| Oculorespiratory syndrome             | Conjunctival infections, irritations and inflammations         | Ocular infections, irritations and inflammations             | Eye disorders                                        |
| Contact stomatitis                    | Stomatitis and ulceration                                      | Oral soft tissue conditions                                  | Gastrointestinal disorders                           |
| Oropharyngeal blistering              | Upper respiratory tract signs and symptoms                     | Respiratory disorders NEC                                    | Respiratory, thoracic and mediastinal disorders      |
| Interstitial granulomatous dermatitis | Granulomatous and deep cutaneous inflammatory conditions       | Epidermal and dermal conditions                              | Skin and subcutaneous tissue disorders               |
| Injection site vasculitis             | Injection site reactions                                       | Administration site reactions                                | General disorders and administration site conditions |
| First use syndrome                    | Anaphylactic responses                                         | Allergic conditions                                          | Immune system disorders                              |
| Oral allergy syndrome                 | Allergies to foods, food additives, drugs and other chemicals  | Allergic conditions                                          | Immune system disorders                              |
| Vaccination site hypersensitivity     | Vaccination site reactions                                     | Administration site reactions                                | General disorders and administration site conditions |
| Kounis syndrome                       | Ischaemic coronary artery disorders                            | Coronary artery disorders                                    | Cardiac disorders                                    |
| Henoch-Schonlein purpura nephritis    | Glomerulonephritis and nephrotic syndrome                      | Nephropathies                                                | Renal and urinary disorders                          |
| Vaccination site dermatitis           | Vaccination site reactions                                     | Administration site reactions                                | General disorders and administration site conditions |
| Vaccination site rash                 | Vaccination site reactions                                     | Administration site reactions                                | General disorders and administration site conditions |
| Vaccination site exfoliation          | Vaccination site reactions                                     | Administration site reactions                                | General disorders and administration site conditions |
| Vaccination site urticaria            | Vaccination site reactions                                     | Administration site reactions                                | General disorders and administration site conditions |
| Vaccination site vesicles             | Vaccination site reactions                                     | Administration site reactions                                | General disorders and administration site conditions |
| Limbal swelling                       | Ocular infections, inflammations and associated manifestations | Ocular infections, irritations and inflammations             | Eye disorders                                        |
| Distributive shock                    | Circulatory collapse and shock                                 | Decreased and nonspecific blood pressure disorders and shock | Vascular disorders                                   |



|                                                       |                                                           |                                                            |                                                      |
|-------------------------------------------------------|-----------------------------------------------------------|------------------------------------------------------------|------------------------------------------------------|
| Immune tolerance induction                            | Prophylactic procedures NEC                               | Therapeutic procedures and supportive care NEC             | Surgical and medical procedures                      |
| Administration site rash                              | Administration site reactions NEC                         | Administration site reactions                              | General disorders and administration site conditions |
| Allergic hepatitis                                    | Hepatocellular damage and hepatitis NEC                   | Hepatic and hepatobiliary disorders                        | Hepatobiliary disorders                              |
| Chronic hyperplastic eosinophilic sinusitis           | Paranasal sinus disorders (excl infections and neoplasms) | Upper respiratory tract disorders (excl infections)        | Respiratory, thoracic and mediastinal disorders      |
| Chronic eosinophilic rhinosinusitis                   | Paranasal sinus disorders (excl infections and neoplasms) | Upper respiratory tract disorders (excl infections)        | Respiratory, thoracic and mediastinal disorders      |
| Vulvovaginal rash                                     | Vulvovaginal signs and symptoms                           | Vulvovaginal disorders (excl infections and inflammations) | Reproductive system and breast disorders             |
| Incision site dermatitis                              | Non-site specific procedural complications                | Procedural related injuries and complications NEC          | Injury, poisoning and procedural complications       |
| Idiopathic angioedema                                 | Angioedemas                                               | Angioedema and urticaria                                   | Skin and subcutaneous tissue disorders               |
| Incision site rash                                    | Non-site specific procedural complications                | Procedural related injuries and complications NEC          | Injury, poisoning and procedural complications       |
| Drug reaction with eosinophilia and systemic symptoms | Dermatitis ascribed to specific agent                     | Epidermal and dermal conditions                            | Skin and subcutaneous tissue disorders               |
| Catheter site dermatitis                              | Implant and catheter site reactions                       | Administration site reactions                              | General disorders and administration site conditions |
| Catheter site eczema                                  | Implant and catheter site reactions                       | Administration site reactions                              | General disorders and administration site conditions |
| Catheter site hypersensitivity                        | Implant and catheter site reactions                       | Administration site reactions                              | General disorders and administration site conditions |
| Catheter site vasculitis                              | Implant and catheter site reactions                       | Administration site reactions                              | General disorders and administration site conditions |
| Allergy to immunoglobulin therapy                     | Allergic conditions NEC                                   | Allergic conditions                                        | Immune system disorders                              |
| Pathergy reaction                                     | Dermal and epidermal conditions NEC                       | Epidermal and dermal conditions                            | Skin and subcutaneous tissue disorders               |
| Drug provocation test                                 | Immunology analyses NEC                                   | Immunology and allergy investigations                      | Investigations                                       |
| Palatal swelling                                      | Oral soft tissue swelling and oedema                      | Oral soft tissue conditions                                | Gastrointestinal disorders                           |
| Stoma site hypersensitivity                           | Stoma complications                                       | Procedural related injuries and complications NEC          | Injury, poisoning and procedural complications       |
| Immune thrombocytopenic purpura                       | Thrombocytopenias                                         | Platelet disorders                                         | Blood and lymphatic system disorders                 |
| Infusion site eczema                                  | Infusion site reactions                                   | Administration site reactions                              | General disorders and administration site conditions |
| Infusion site vasculitis                              | Infusion site reactions                                   | Administration site reactions                              | General disorders and administration site conditions |

### 4.3 Antibody adverse events

| Preferred term                                    | High level term                      | High level group term                                         | System organ class                         |
|---------------------------------------------------|--------------------------------------|---------------------------------------------------------------|--------------------------------------------|
| Coagulation factor XIII level                     | Coagulation and bleeding analyses    | Haematology investigations (incl blood groups)                | Investigations                             |
| Coagulation factor XIII level decreased           | Coagulation and bleeding analyses    | Haematology investigations (incl blood groups)                | Investigations                             |
| Drug specific antibody present                    | Therapeutic drug monitoring analyses | Toxicology and therapeutic drug monitoring                    | Investigations                             |
| Factor XIII deficiency                            | Coagulation disorders congenital     | Blood and lymphatic system disorders congenital               | Congenital, familial and genetic disorders |
| Factor VIII inhibition                            | Coagulopathies                       | Coagulopathies and bleeding diatheses (excl thrombocytopenic) | Blood and lymphatic system disorders       |
| Anti factor VIII antibody positive                | Coagulation and bleeding analyses    | Haematology investigations (incl blood groups)                | Investigations                             |
| Anti-insulin antibody                             | Autoimmunity analyses                | Immunology and allergy investigations                         | Investigations                             |
| Factor IX inhibition                              | Coagulopathies                       | Coagulopathies and bleeding diatheses (excl thrombocytopenic) | Blood and lymphatic system disorders       |
| Anti-insulin antibody positive                    | Autoimmunity analyses                | Immunology and allergy investigations                         | Investigations                             |
| Anti-insulin antibody increased                   | Autoimmunity analyses                | Immunology and allergy investigations                         | Investigations                             |
| Haemophilia A with anti factor VIII               | Coagulation disorders congenital     | Blood and lymphatic system disorders congenital               | Congenital, familial and genetic disorders |
| Haemophilia B with anti factor IX                 | Coagulation disorders congenital     | Blood and lymphatic system disorders congenital               | Congenital, familial and genetic disorders |
| Acquired haemophilia with anti FVIII, XI, or XIII | Coagulation factor deficiencies      | Coagulopathies and bleeding diatheses (excl thrombocytopenic) | Blood and lymphatic system disorders       |
| Inhibiting antibodies                             | Immunology analyses NEC              | Immunology and allergy investigations                         | Investigations                             |
| Neutralising antibodies                           | Immunology analyses NEC              | Immunology and allergy investigations                         | Investigations                             |
| Anti factor VII antibody positive                 | Coagulation and bleeding analyses    | Haematology investigations (incl blood groups)                | Investigations                             |
| Anti factor IX antibody positive                  | Coagulation and bleeding analyses    | Haematology investigations (incl blood groups)                | Investigations                             |
| Factor XIII Inhibition                            | Coagulopathies                       | Coagulopathies and bleeding diatheses (excl thrombocytopenic) | Blood and lymphatic system disorders       |

|                                        |                                   |                                                |                |
|----------------------------------------|-----------------------------------|------------------------------------------------|----------------|
| Autoantibody test                      | Autoimmunity analyses             | Immunology and allergy investigations          | Investigations |
| Autoantibody positive                  | Autoimmunity analyses             | Immunology and allergy investigations          | Investigations |
| Antibody test                          | Immunology analyses NEC           | Immunology and allergy investigations          | Investigations |
| Antibody test abnormal                 | Immunology analyses NEC           | Immunology and allergy investigations          | Investigations |
| Antibody test positive                 | Immunology analyses NEC           | Immunology and allergy investigations          | Investigations |
| Coagulation factor XIII level abnormal | Coagulation and bleeding analyses | Haematology investigations (incl blood groups) | Investigations |
| Neutralising antibodies positive       | Immunology analyses NEC           | Immunology and allergy investigations          | Investigations |
| Non-neutralising antibodies positive   | Immunology analyses NEC           | Immunology and allergy investigations          | Investigations |
| Anti factor VIII antibody test         | Coagulation and bleeding analyses | Haematology investigations (incl blood groups) | Investigations |

#### 4.4 Calcitonin adverse events

| Preferred term                | High level term                                        | High level group term                                        | System organ class                 |
|-------------------------------|--------------------------------------------------------|--------------------------------------------------------------|------------------------------------|
| Blood calcitonin              | Gastrointestinal, pancreatic and APUD hormone analyses | Endocrine investigations (incl sex hormones)                 | Investigations                     |
| Blood calcitonin abnormal     | Gastrointestinal, pancreatic and APUD hormone analyses | Endocrine investigations (incl sex hormones)                 | Investigations                     |
| Blood calcitonin increased    | Gastrointestinal, pancreatic and APUD hormone analyses | Endocrine investigations (incl sex hormones)                 | Investigations                     |
| Calcitonin secretion disorder | Thyroid disorders NEC                                  | Thyroid gland disorders                                      | Endocrine disorders                |
| Ectopic calcitonin production | Ectopic endocrine disorders                            | Neoplastic and ectopic endocrinopathies                      | Endocrine disorders                |
| Hypercalcaemia                | Calcium metabolism disorders                           | Bone, calcium, magnesium and phosphorus metabolism disorders | Metabolism and nutrition disorders |

#### 4.5 Cardiovascular adverse events

| Preferred term                 | High level term                      | High level group term                                              | System organ class                              |
|--------------------------------|--------------------------------------|--------------------------------------------------------------------|-------------------------------------------------|
| Acquired cardiac septal defect | Myocardial disorders NEC             | Myocardial disorders                                               | Cardiac disorders                               |
| Acute myocardial infarction    | Ischaemic coronary artery disorders  | Coronary artery disorders                                          | Cardiac disorders                               |
| Acute prerenal failure         | Renal failure and impairment         | Renal disorders (excl nephropathies)                               | Renal and urinary disorders                     |
| Acute pulmonary oedema         | Pulmonary oedemas                    | Lower respiratory tract disorders (excl obstruction and infection) | Respiratory, thoracic and mediastinal disorders |
| Acute respiratory failure      | Respiratory failures (excl neonatal) | Respiratory disorders NEC                                          | Respiratory, thoracic and mediastinal disorders |
| Adams-Stokes syndrome          | Cardiac conduction disorders         | Cardiac arrhythmias                                                | Cardiac disorders                               |
| Allergic myocarditis           | Noninfectious myocarditis            | Myocardial disorders                                               | Cardiac disorders                               |
| Amaurosis                      | Blindness (excl colour blindness)    | Vision disorders                                                   | Eye disorders                                   |

|                                       |                                               |                                                      |                                                |
|---------------------------------------|-----------------------------------------------|------------------------------------------------------|------------------------------------------------|
| Amaurosis fugax                       | Blindness (excl colour blindness)             | Vision disorders                                     | Eye disorders                                  |
| Anaphylactic reaction                 | Anaphylactic responses                        | Allergic conditions                                  | Immune system disorders                        |
| Anaphylactic shock                    | Anaphylactic responses                        | Allergic conditions                                  | Immune system disorders                        |
| Anaphylactoid reaction                | Anaphylactic responses                        | Allergic conditions                                  | Immune system disorders                        |
| Angina pectoris                       | Ischaemic coronary artery disorders           | Coronary artery disorders                            | Cardiac disorders                              |
| Angina unstable                       | Ischaemic coronary artery disorders           | Coronary artery disorders                            | Cardiac disorders                              |
| Angioplasty                           | Vascular therapeutic procedures NEC           | Vascular therapeutic procedures                      | Surgical and medical procedures                |
| Anomalous atrioventricular excitation | Rate and rhythm disorders NEC                 | Cardiac arrhythmias                                  | Cardiac disorders                              |
| Anuria                                | Renal failure and impairment                  | Renal disorders (excl nephropathies)                 | Renal and urinary disorders                    |
| Aortic embolus                        | Aortic embolism and thrombosis                | Embolism and thrombosis                              | Vascular disorders                             |
| Aortic thrombosis                     | Aortic embolism and thrombosis                | Embolism and thrombosis                              | Vascular disorders                             |
| Aortitis                              | Aortic inflammatory disorders                 | Vascular inflammations                               | Vascular disorders                             |
| Aphasia                               | Cortical dysfunction NEC                      | Neurological disorders NEC                           | Nervous system disorders                       |
| Arrhythmia                            | Rate and rhythm disorders NEC                 | Cardiac arrhythmias                                  | Cardiac disorders                              |
| Arrhythmia neonatal                   | Rate and rhythm disorders NEC                 | Cardiac arrhythmias                                  | Cardiac disorders                              |
| Arrhythmia supraventricular           | Supraventricular arrhythmias                  | Cardiac arrhythmias                                  | Cardiac disorders                              |
| Arterectomy with graft replacement    | Arterial therapeutic procedures (excl aortic) | Vascular therapeutic procedures                      | Surgical and medical procedures                |
| Arterial thrombosis                   | Non-site specific embolism and thrombosis     | Embolism and thrombosis                              | Vascular disorders                             |
| Arteriovenous fistula thrombosis      | Cardiac and vascular procedural complications | Procedural related injuries and complications<br>NEC | Injury, poisoning and procedural complications |
| Arteriogram carotid abnormal          | Vascular imaging procedures NEC               | Cardiac and vascular investigations (excl enzyme     | Investigations                                 |

|                                      |                                               |                                                         |                            |
|--------------------------------------|-----------------------------------------------|---------------------------------------------------------|----------------------------|
|                                      |                                               | tests)                                                  |                            |
| Arteriogram coronary abnormal        | Cardiac imaging procedures                    | Cardiac and vascular investigations (excl enzyme tests) | Investigations             |
| Arteriosclerosis coronary artery     | Coronary artery disorders NEC                 | Coronary artery disorders                               | Cardiac disorders          |
| Arteriospasm coronary                | Ischaemic coronary artery disorders           | Coronary artery disorders                               | Cardiac disorders          |
| Arteritis                            | Arterial inflammations                        | Vascular inflammations                                  | Vascular disorders         |
| Arteritis coronary                   | Coronary artery disorders NEC                 | Coronary artery disorders                               | Cardiac disorders          |
| Ascites                              | Peritoneal and retroperitoneal disorders      | Peritoneal and retroperitoneal conditions               | Gastrointestinal disorders |
| Atrial fibrillation                  | Supraventricular arrhythmias                  | Cardiac arrhythmias                                     | Cardiac disorders          |
| Atrial flutter                       | Supraventricular arrhythmias                  | Cardiac arrhythmias                                     | Cardiac disorders          |
| Atrial septal defect acquired        | Myocardial disorders NEC                      | Myocardial disorders                                    | Cardiac disorders          |
| Atrial tachycardia                   | Supraventricular arrhythmias                  | Cardiac arrhythmias                                     | Cardiac disorders          |
| Atrioventricular block               | Cardiac conduction disorders                  | Cardiac arrhythmias                                     | Cardiac disorders          |
| Atrioventricular block complete      | Cardiac conduction disorders                  | Cardiac arrhythmias                                     | Cardiac disorders          |
| Atrioventricular block first degree  | Cardiac conduction disorders                  | Cardiac arrhythmias                                     | Cardiac disorders          |
| Atrioventricular block second degree | Cardiac conduction disorders                  | Cardiac arrhythmias                                     | Cardiac disorders          |
| Axillary vein thrombosis             | Peripheral embolism and thrombosis            | Embolism and thrombosis                                 | Vascular disorders         |
| Basilar artery stenosis              | Central nervous system vascular disorders NEC | Central nervous system vascular disorders               | Nervous system disorders   |
| Behcet's syndrome                    | Vasculitides NEC                              | Vascular inflammations                                  | Vascular disorders         |
| Biopsy heart abnormal                | Cardiac histopathology procedures             | Cardiac and vascular investigations (excl enzyme tests) | Investigations             |

|                                           |                                               |                                                              |                          |
|-------------------------------------------|-----------------------------------------------|--------------------------------------------------------------|--------------------------|
| Blindness transient                       | Blindness (excl colour blindness)             | Vision disorders                                             | Eye disorders            |
| Blood creatine phosphokinase abnormal     | Skeletal and cardiac muscle analyses          | Enzyme investigations NEC                                    | Investigations           |
| Blood creatine phosphokinase increased    | Skeletal and cardiac muscle analyses          | Enzyme investigations NEC                                    | Investigations           |
| Blood creatine phosphokinase MB abnormal  | Skeletal and cardiac muscle analyses          | Enzyme investigations NEC                                    | Investigations           |
| Blood creatine phosphokinase MB increased | Skeletal and cardiac muscle analyses          | Enzyme investigations NEC                                    | Investigations           |
| Blood pressure diastolic abnormal         | Vascular tests NEC (incl blood pressure)      | Cardiac and vascular investigations (excl enzyme tests)      | Investigations           |
| Blood pressure diastolic decreased        | Vascular tests NEC (incl blood pressure)      | Cardiac and vascular investigations (excl enzyme tests)      | Investigations           |
| Blood pressure diastolic increased        | Vascular tests NEC (incl blood pressure)      | Cardiac and vascular investigations (excl enzyme tests)      | Investigations           |
| Blood pressure fluctuation                | Blood pressure disorders NEC                  | Decreased and nonspecific blood pressure disorders and shock | Vascular disorders       |
| Blood pressure immeasurable               | Vascular tests NEC (incl blood pressure)      | Cardiac and vascular investigations (excl enzyme tests)      | Investigations           |
| Blood pressure systolic abnormal          | Vascular tests NEC (incl blood pressure)      | Cardiac and vascular investigations (excl enzyme tests)      | Investigations           |
| Blood pressure systolic decreased         | Vascular tests NEC (incl blood pressure)      | Cardiac and vascular investigations (excl enzyme tests)      | Investigations           |
| Blood pressure systolic increased         | Vascular tests NEC (incl blood pressure)      | Cardiac and vascular investigations (excl enzyme tests)      | Investigations           |
| Bradycardia                               | Rate and rhythm disorders NEC                 | Cardiac arrhythmias                                          | Cardiac disorders        |
| Bradycardia foetal                        | Rate and rhythm disorders NEC                 | Cardiac arrhythmias                                          | Cardiac disorders        |
| Brain hypoxia                             | Central nervous system vascular disorders NEC | Central nervous system vascular disorders                    | Nervous system disorders |
| Brain stem haemorrhage                    | Central nervous system haemorrhages and       | Central nervous system vascular disorders                    | Nervous system disorders |

|                               |                                                                   |                                           |                          |
|-------------------------------|-------------------------------------------------------------------|-------------------------------------------|--------------------------|
|                               | cerebrovascular accidents                                         |                                           |                          |
| Brain stem infarction         | Central nervous system haemorrhages and cerebrovascular accidents | Central nervous system vascular disorders | Nervous system disorders |
| Brain stem ischaemia          | Central nervous system haemorrhages and cerebrovascular accidents | Central nervous system vascular disorders | Nervous system disorders |
| Budd-Chiari syndrome          | Hepatic vascular disorders                                        | Hepatic and hepatobiliary disorders       | Hepatobiliary disorders  |
| Bundle branch block           | Cardiac conduction disorders                                      | Cardiac arrhythmias                       | Cardiac disorders        |
| Bundle branch block bilateral | Cardiac conduction disorders                                      | Cardiac arrhythmias                       | Cardiac disorders        |
| Bundle branch block left      | Cardiac conduction disorders                                      | Cardiac arrhythmias                       | Cardiac disorders        |
| Bundle branch block right     | Cardiac conduction disorders                                      | Cardiac arrhythmias                       | Cardiac disorders        |
| Cardiac amyloidosis           | Myocardial disorders NEC                                          | Myocardial disorders                      | Cardiac disorders        |
| Cardiac aneurysm              | Myocardial disorders NEC                                          | Myocardial disorders                      | Cardiac disorders        |
| Cardiac arrest                | Ventricular arrhythmias and cardiac arrest                        | Cardiac arrhythmias                       | Cardiac disorders        |
| Cardiac arrest neonatal       | Ventricular arrhythmias and cardiac arrest                        | Cardiac arrhythmias                       | Cardiac disorders        |
| Cardiac asthma                | Heart failure signs and symptoms                                  | Heart failures                            | Cardiac disorders        |
| Cardiac failure               | Heart failures NEC                                                | Heart failures                            | Cardiac disorders        |
| Cardiac failure acute         | Heart failures NEC                                                | Heart failures                            | Cardiac disorders        |
| Cardiac failure chronic       | Heart failures NEC                                                | Heart failures                            | Cardiac disorders        |
| Cardiac failure congestive    | Heart failures NEC                                                | Heart failures                            | Cardiac disorders        |
| Cardiac failure high output   | Heart failures NEC                                                | Heart failures                            | Cardiac disorders        |
| Cardiac hypertrophy           | Myocardial disorders NEC                                          | Myocardial disorders                      | Cardiac disorders        |



|                                       |                                                                   |                                                         |                          |
|---------------------------------------|-------------------------------------------------------------------|---------------------------------------------------------|--------------------------|
| Cardiac index abnormal                | Cardiac function diagnostic procedures                            | Cardiac and vascular investigations (excl enzyme tests) | Investigations           |
| Cardiac index decreased               | Cardiac function diagnostic procedures                            | Cardiac and vascular investigations (excl enzyme tests) | Investigations           |
| Cardiac index increased               | Cardiac function diagnostic procedures                            | Cardiac and vascular investigations (excl enzyme tests) | Investigations           |
| Cardiac output decreased              | Cardiac function diagnostic procedures                            | Cardiac and vascular investigations (excl enzyme tests) | Investigations           |
| Cardiac sarcoidosis                   | Myocardial disorders NEC                                          | Myocardial disorders                                    | Cardiac disorders        |
| Cardio-respiratory arrest             | Ventricular arrhythmias and cardiac arrest                        | Cardiac arrhythmias                                     | Cardiac disorders        |
| Cardio-respiratory arrest neonatal    | Ventricular arrhythmias and cardiac arrest                        | Cardiac arrhythmias                                     | Cardiac disorders        |
| Cardiogenic shock                     | Heart failures NEC                                                | Heart failures                                          | Cardiac disorders        |
| Cardiomegaly                          | Myocardial disorders NEC                                          | Myocardial disorders                                    | Cardiac disorders        |
| Cardiomyopathy                        | Cardiomyopathies                                                  | Myocardial disorders                                    | Cardiac disorders        |
| Cardiomyopathy alcoholic              | Cardiomyopathies                                                  | Myocardial disorders                                    | Cardiac disorders        |
| Cardiothoracic ratio increased        | Cardiac imaging procedures                                        | Cardiac and vascular investigations (excl enzyme tests) | Investigations           |
| Cardiovascular disorder               | Cardiac disorders NEC                                             | Cardiac disorder signs and symptoms                     | Cardiac disorders        |
| Cardiovascular function test abnormal | Cardiac function diagnostic procedures                            | Cardiac and vascular investigations (excl enzyme tests) | Investigations           |
| Carotid arterial embolus              | Central nervous system haemorrhages and cerebrovascular accidents | Central nervous system vascular disorders               | Nervous system disorders |
| Carotid artery aneurysm               | Central nervous system aneurysms and dissections                  | Central nervous system vascular disorders               | Nervous system disorders |
| Carotid artery stenosis               | Central nervous system vascular disorders NEC                     | Central nervous system vascular disorders               | Nervous system disorders |

|                                                  |                                                                   |                                                         |                                            |
|--------------------------------------------------|-------------------------------------------------------------------|---------------------------------------------------------|--------------------------------------------|
| Carotid artery thrombosis                        | Central nervous system haemorrhages and cerebrovascular accidents | Central nervous system vascular disorders               | Nervous system disorders                   |
| Carotid endarterectomy                           | Arterial therapeutic procedures (excl aortic)                     | Vascular therapeutic procedures                         | Surgical and medical procedures            |
| Cavernous sinus thrombosis                       | Central nervous system and spinal infections                      | Infections - pathogen unspecified                       | Infections and infestations                |
| Central venous pressure increased                | Cardiac function diagnostic procedures                            | Cardiac and vascular investigations (excl enzyme tests) | Investigations                             |
| Cerebellar artery thrombosis                     | Central nervous system haemorrhages and cerebrovascular accidents | Central nervous system vascular disorders               | Nervous system disorders                   |
| Cerebellar haemorrhage                           | Central nervous system haemorrhages and cerebrovascular accidents | Central nervous system vascular disorders               | Nervous system disorders                   |
| Cerebellar infarction                            | Central nervous system haemorrhages and cerebrovascular accidents | Central nervous system vascular disorders               | Nervous system disorders                   |
| Cerebral aneurysm ruptured syphilitic            | Treponema infections                                              | Bacterial infectious disorders                          | Infections and infestations                |
| Cerebral arteriovenous malformation haemorrhagic | Vascular anomalies congenital NEC                                 | Cardiac and vascular disorders congenital               | Congenital, familial and genetic disorders |
| Cerebral arteritis                               | Central nervous system vascular disorders NEC                     | Central nervous system vascular disorders               | Nervous system disorders                   |
| Cerebral artery embolism                         | Central nervous system haemorrhages and cerebrovascular accidents | Central nervous system vascular disorders               | Nervous system disorders                   |
| Cerebral artery occlusion                        | Central nervous system haemorrhages and cerebrovascular accidents | Central nervous system vascular disorders               | Nervous system disorders                   |
| Cerebral artery thrombosis                       | Central nervous system haemorrhages and cerebrovascular accidents | Central nervous system vascular disorders               | Nervous system disorders                   |
| Cerebral circulatory failure                     | Central nervous system vascular disorders NEC                     | Central nervous system vascular disorders               | Nervous system disorders                   |
| Cerebral haemorrhage                             | Central nervous system haemorrhages and cerebrovascular accidents | Central nervous system vascular disorders               | Nervous system disorders                   |
| Cerebral haemorrhage neonatal                    | Central nervous system haemorrhages and                           | Central nervous system vascular disorders               | Nervous system disorders                   |

|                            |                                                                   |                                                              |                                                      |
|----------------------------|-------------------------------------------------------------------|--------------------------------------------------------------|------------------------------------------------------|
|                            | cerebrovascular accidents                                         |                                                              |                                                      |
| Cerebral infarction        | Central nervous system haemorrhages and cerebrovascular accidents | Central nervous system vascular disorders                    | Nervous system disorders                             |
| Cerebral infarction foetal | Central nervous system haemorrhages and cerebrovascular accidents | Central nervous system vascular disorders                    | Nervous system disorders                             |
| Cerebral ischaemia         | Central nervous system haemorrhages and cerebrovascular accidents | Central nervous system vascular disorders                    | Nervous system disorders                             |
| Cerebral thrombosis        | Central nervous system haemorrhages and cerebrovascular accidents | Central nervous system vascular disorders                    | Nervous system disorders                             |
| Cerebral venous thrombosis | Cerebrovascular venous and sinus thrombosis                       | Central nervous system vascular disorders                    | Nervous system disorders                             |
| Cerebrovascular accident   | Central nervous system haemorrhages and cerebrovascular accidents | Central nervous system vascular disorders                    | Nervous system disorders                             |
| Cerebrovascular disorder   | Central nervous system vascular disorders NEC                     | Central nervous system vascular disorders                    | Nervous system disorders                             |
| Chest pain                 | Pain and discomfort NEC                                           | General system disorders NEC                                 | General disorders and administration site conditions |
| Chest X-ray abnormal       | Respiratory tract and thoracic imaging procedures                 | Respiratory and pulmonary investigations (excl blood gases)  | Investigations                                       |
| Circulatory collapse       | Circulatory collapse and shock                                    | Decreased and nonspecific blood pressure disorders and shock | Vascular disorders                                   |
| Conduction disorder        | Cardiac conduction disorders                                      | Cardiac arrhythmias                                          | Cardiac disorders                                    |
| Cor pulmonale              | Right ventricular failures                                        | Heart failures                                               | Cardiac disorders                                    |
| Cor pulmonale acute        | Right ventricular failures                                        | Heart failures                                               | Cardiac disorders                                    |
| Cor pulmonale chronic      | Right ventricular failures                                        | Heart failures                                               | Cardiac disorders                                    |
| Coronary artery bypass     | Arterial therapeutic procedures (excl aortic)                     | Vascular therapeutic procedures                              | Surgical and medical procedures                      |
| Coronary artery disease    | Coronary artery disorders NEC                                     | Coronary artery disorders                                    | Cardiac disorders                                    |

|                                         |                                               |                                                         |                                        |
|-----------------------------------------|-----------------------------------------------|---------------------------------------------------------|----------------------------------------|
| Coronary artery embolism                | Coronary artery disorders NEC                 | Coronary artery disorders                               | Cardiac disorders                      |
| Coronary artery occlusion               | Coronary artery disorders NEC                 | Coronary artery disorders                               | Cardiac disorders                      |
| Coronary artery stenosis                | Coronary artery disorders NEC                 | Coronary artery disorders                               | Cardiac disorders                      |
| Coronary artery thrombosis              | Coronary artery disorders NEC                 | Coronary artery disorders                               | Cardiac disorders                      |
| Coronary endarterectomy                 | Arterial therapeutic procedures (excl aortic) | Vascular therapeutic procedures                         | Surgical and medical procedures        |
| Coronary ostial stenosis                | Coronary artery disorders NEC                 | Coronary artery disorders                               | Cardiac disorders                      |
| Coxsackie carditis                      | Coxsackie viral infections                    | Viral infectious disorders                              | Infections and infestations            |
| Coxsackie myocarditis                   | Coxsackie viral infections                    | Viral infectious disorders                              | Infections and infestations            |
| Cryoglobulinaemia                       | Vasculitides NEC                              | Vascular inflammations                                  | Vascular disorders                     |
| Cryoglobulins present                   | Immunoglobulin analyses                       | Immunology and allergy investigations                   | Investigations                         |
| Cutaneous vasculitis                    | Skin vasculitides                             | Skin vascular abnormalities                             | Skin and subcutaneous tissue disorders |
| Cytotoxic cardiomyopathy                | Cardiomyopathies                              | Myocardial disorders                                    | Cardiac disorders                      |
| Defect conduction intraventricular      | Cardiac conduction disorders                  | Cardiac arrhythmias                                     | Cardiac disorders                      |
| Diabetic cardiomyopathy                 | Cardiomyopathies                              | Myocardial disorders                                    | Cardiac disorders                      |
| Diffuse vasculitis                      | Vasculitides NEC                              | Vascular inflammations                                  | Vascular disorders                     |
| Dilatation atrial                       | Myocardial disorders NEC                      | Myocardial disorders                                    | Cardiac disorders                      |
| Dilatation ventricular                  | Myocardial disorders NEC                      | Myocardial disorders                                    | Cardiac disorders                      |
| Diplegia                                | Paralysis and paresis (excl cranial nerve)    | Movement disorders (incl parkinsonism)                  | Nervous system disorders               |
| Directional Doppler flow tests abnormal | Vascular imaging procedures NEC               | Cardiac and vascular investigations (excl enzyme tests) | Investigations                         |
| Dissecting coronary artery aneurysm     | Coronary artery disorders NEC                 | Coronary artery disorders                               | Cardiac disorders                      |

|                                                   |                                        |                                                               |                                                 |
|---------------------------------------------------|----------------------------------------|---------------------------------------------------------------|-------------------------------------------------|
| Disseminated intravascular coagulation            | Coagulopathies                         | Coagulopathies and bleeding diatheses (excl thrombocytopenic) | Blood and lymphatic system disorders            |
| Disseminated intravascular coagulation in newborn | Coagulopathies                         | Coagulopathies and bleeding diatheses (excl thrombocytopenic) | Blood and lymphatic system disorders            |
| Dysarthria                                        | Speech and language abnormalities      | Neurological disorders NEC                                    | Nervous system disorders                        |
| Dyspnoea                                          | Breathing abnormalities                | Respiratory disorders NEC                                     | Respiratory, thoracic and mediastinal disorders |
| Dyspnoea paroxysmal nocturnal                     | Breathing abnormalities                | Respiratory disorders NEC                                     | Respiratory, thoracic and mediastinal disorders |
| Ejection fraction abnormal                        | Cardiac function diagnostic procedures | Cardiac and vascular investigations (excl enzyme tests)       | Investigations                                  |
| Electrocardiogram abnormal                        | ECG investigations                     | Cardiac and vascular investigations (excl enzyme tests)       | Investigations                                  |
| Electrocardiogram ambulatory abnormal             | ECG investigations                     | Cardiac and vascular investigations (excl enzyme tests)       | Investigations                                  |
| Electrocardiogram delta waves abnormal            | ECG investigations                     | Cardiac and vascular investigations (excl enzyme tests)       | Investigations                                  |
| Electrocardiogram PR shortened                    | ECG investigations                     | Cardiac and vascular investigations (excl enzyme tests)       | Investigations                                  |
| Electrocardiogram QRS complex prolonged           | ECG investigations                     | Cardiac and vascular investigations (excl enzyme tests)       | Investigations                                  |
| Electrocardiogram QT prolonged                    | ECG investigations                     | Cardiac and vascular investigations (excl enzyme tests)       | Investigations                                  |
| Electrocardiogram ST segment abnormal             | ECG investigations                     | Cardiac and vascular investigations (excl enzyme tests)       | Investigations                                  |
| Electrocardiogram ST segment depression           | ECG investigations                     | Cardiac and vascular investigations (excl enzyme tests)       | Investigations                                  |
| Electrocardiogram ST segment elevation            | ECG investigations                     | Cardiac and vascular investigations (excl enzyme tests)       | Investigations                                  |

|                                     |                                                                   |                                                         |                                                |
|-------------------------------------|-------------------------------------------------------------------|---------------------------------------------------------|------------------------------------------------|
| Electrocardiogram T wave inversion  | ECG investigations                                                | Cardiac and vascular investigations (excl enzyme tests) | Investigations                                 |
| Embolic stroke                      | Central nervous system haemorrhages and cerebrovascular accidents | Central nervous system vascular disorders               | Nervous system disorders                       |
| Embolism arterial                   | Non-site specific embolism and thrombosis                         | Embolism and thrombosis                                 | Vascular disorders                             |
| Embolism venous                     | Non-site specific embolism and thrombosis                         | Embolism and thrombosis                                 | Vascular disorders                             |
| Endarterectomy                      | Arterial therapeutic procedures (excl aortic)                     | Vascular therapeutic procedures                         | Surgical and medical procedures                |
| Endocardial fibroelastosis          | Cardiac disorders congenital NEC                                  | Cardiac and vascular disorders congenital               | Congenital, familial and genetic disorders     |
| Endotoxic shock                     | Sepsis, bacteraemia, viraemia and fungaemia NEC                   | Infections - pathogen unspecified                       | Infections and infestations                    |
| Eosinophilic myocarditis            | Noninfectious myocarditis                                         | Myocardial disorders                                    | Cardiac disorders                              |
| Erythema induratum                  | Tuberculous infections                                            | Mycobacterial infectious disorders                      | Infections and infestations                    |
| Exercise electrocardiogram abnormal | ECG investigations                                                | Cardiac and vascular investigations (excl enzyme tests) | Investigations                                 |
| Exercise test abnormal              | Cardiac function diagnostic procedures                            | Cardiac and vascular investigations (excl enzyme tests) | Investigations                                 |
| Extradural haematoma                | Cerebral injuries NEC                                             | Injuries NEC                                            | Injury, poisoning and procedural complications |
| Extrasystoles                       | Rate and rhythm disorders NEC                                     | Cardiac arrhythmias                                     | Cardiac disorders                              |
| Foetal arrhythmia                   | Rate and rhythm disorders NEC                                     | Cardiac arrhythmias                                     | Cardiac disorders                              |
| Goodpasture's syndrome              | Glomerulonephritis and nephrotic syndrome                         | Nephropathies                                           | Renal and urinary disorders                    |
| Grey syndrome neonatal              | Heart failures NEC                                                | Heart failures                                          | Cardiac disorders                              |
| Haemorrhage intracranial            | Central nervous system haemorrhages and cerebrovascular accidents | Central nervous system vascular disorders               | Nervous system disorders                       |
| Haemorrhagic cerebral infarction    | Central nervous system haemorrhages and                           | Central nervous system vascular disorders               | Nervous system disorders                       |

|                           |                                                                   |                                                                 |                                            |
|---------------------------|-------------------------------------------------------------------|-----------------------------------------------------------------|--------------------------------------------|
|                           | cerebrovascular accidents                                         |                                                                 |                                            |
| Haemorrhagic infarction   | Non-site specific necrosis and vascular insufficiency NEC         | Arteriosclerosis, stenosis, vascular insufficiency and necrosis | Vascular disorders                         |
| Haemorrhagic stroke       | Central nervous system haemorrhages and cerebrovascular accidents | Central nervous system vascular disorders                       | Nervous system disorders                   |
| Haemorrhoids thrombosed   | Haemorrhoids and gastrointestinal varices (excl oesophageal)      | Gastrointestinal vascular conditions                            | Gastrointestinal disorders                 |
| Heart block congenital    | Cardiac disorders congenital NEC                                  | Cardiac and vascular disorders congenital                       | Congenital, familial and genetic disorders |
| Heart rate abnormal       | Heart rate and pulse investigations                               | Cardiac and vascular investigations (excl enzyme tests)         | Investigations                             |
| Heart rate decreased      | Heart rate and pulse investigations                               | Cardiac and vascular investigations (excl enzyme tests)         | Investigations                             |
| Heart rate increased      | Heart rate and pulse investigations                               | Cardiac and vascular investigations (excl enzyme tests)         | Investigations                             |
| Heart rate irregular      | Heart rate and pulse investigations                               | Cardiac and vascular investigations (excl enzyme tests)         | Investigations                             |
| Heart transplant          | Cardiac therapeutic procedures NEC                                | Cardiac therapeutic procedures                                  | Surgical and medical procedures            |
| Hemiparesis               | Paralysis and paresis (excl cranial nerve)                        | Movement disorders (incl parkinsonism)                          | Nervous system disorders                   |
| Hemiplegia                | Paralysis and paresis (excl cranial nerve)                        | Movement disorders (incl parkinsonism)                          | Nervous system disorders                   |
| Henoch-Schonlein purpura  | Purpura and related conditions                                    | Skin vascular abnormalities                                     | Skin and subcutaneous tissue disorders     |
| Hepatic artery embolism   | Hepatic vascular disorders                                        | Hepatic and hepatobiliary disorders                             | Hepatobiliary disorders                    |
| Hepatic artery thrombosis | Hepatic vascular disorders                                        | Hepatic and hepatobiliary disorders                             | Hepatobiliary disorders                    |
| Hepatic congestion        | Hepatobiliary signs and symptoms                                  | Hepatic and hepatobiliary disorders                             | Hepatobiliary disorders                    |
| Hepatic infarction        | Hepatic vascular disorders                                        | Hepatic and hepatobiliary disorders                             | Hepatobiliary disorders                    |

|                                       |                                                                   |                                                              |                                                                     |
|---------------------------------------|-------------------------------------------------------------------|--------------------------------------------------------------|---------------------------------------------------------------------|
| Hepatic vein thrombosis               | Hepatic vascular disorders                                        | Hepatic and hepatobiliary disorders                          | Hepatobiliary disorders                                             |
| Hepatomegaly                          | Hepatobiliary signs and symptoms                                  | Hepatic and hepatobiliary disorders                          | Hepatobiliary disorders                                             |
| Hepatorenal failure                   | Hepatic failure and associated disorders                          | Hepatic and hepatobiliary disorders                          | Hepatobiliary disorders                                             |
| Hypersensitivity vasculitis           | Skin vasculitides                                                 | Skin vascular abnormalities                                  | Skin and subcutaneous tissue disorders                              |
| Hypertrophic cardiomyopathy           | Cardiac septal defects congenital                                 | Cardiac and vascular disorders congenital                    | Congenital, familial and genetic disorders                          |
| Hypovolaemic shock                    | Circulatory collapse and shock                                    | Decreased and nonspecific blood pressure disorders and shock | Vascular disorders                                                  |
| Iliac artery embolism                 | Peripheral embolism and thrombosis                                | Embolism and thrombosis                                      | Vascular disorders                                                  |
| Injection site thrombosis             | Injection site reactions                                          | Administration site reactions                                | General disorders and administration site conditions                |
| Intestinal infarction                 | Gastrointestinal vascular occlusion and infarction                | Gastrointestinal vascular conditions                         | Gastrointestinal disorders                                          |
| Intra-cerebral aneurysm operation     | Arterial therapeutic procedures (excl aortic)                     | Vascular therapeutic procedures                              | Surgical and medical procedures                                     |
| Intracranial aneurysm                 | Central nervous system aneurysms and dissections                  | Central nervous system vascular disorders                    | Nervous system disorders                                            |
| Intracranial tumour haemorrhage       | Oncologic complications and emergencies                           | Neoplasm related morbidities                                 | Neoplasms benign, malignant and unspecified (incl cysts and polyps) |
| Intraventricular haemorrhage          | Central nervous system haemorrhages and cerebrovascular accidents | Central nervous system vascular disorders                    | Nervous system disorders                                            |
| Intraventricular haemorrhage neonatal | Central nervous system haemorrhages and cerebrovascular accidents | Central nervous system vascular disorders                    | Nervous system disorders                                            |
| Jugular vein thrombosis               | Peripheral embolism and thrombosis                                | Embolism and thrombosis                                      | Vascular disorders                                                  |
| Kawasaki's disease                    | Arterial inflammations                                            | Vascular inflammations                                       | Vascular disorders                                                  |
| Labile blood pressure                 | Blood pressure disorders NEC                                      | Decreased and nonspecific blood pressure disorders and shock | Vascular disorders                                                  |
| Lateral medullary syndrome            | Central nervous system haemorrhages and                           | Central nervous system vascular disorders                    | Nervous system disorders                                            |



|                                          |                                                    |                                                                 |                                                      |
|------------------------------------------|----------------------------------------------------|-----------------------------------------------------------------|------------------------------------------------------|
|                                          | cerebrovascular accidents                          |                                                                 |                                                      |
| Left ventricular failure                 | Left ventricular failures                          | Heart failures                                                  | Cardiac disorders                                    |
| Leriche syndrome                         | Aortic necrosis and vascular insufficiency         | Arteriosclerosis, stenosis, vascular insufficiency and necrosis | Vascular disorders                                   |
| Long QT syndrome                         | Cardiac conduction disorders                       | Cardiac arrhythmias                                             | Cardiac disorders                                    |
| Loss of consciousness                    | Disturbances in consciousness NEC                  | Neurological disorders NEC                                      | Nervous system disorders                             |
| Low cardiac output syndrome              | Heart failures NEC                                 | Heart failures                                                  | Cardiac disorders                                    |
| Lown-Ganong-Levine syndrome              | Cardiac disorders congenital NEC                   | Cardiac and vascular disorders congenital                       | Congenital, familial and genetic disorders           |
| Mesenteric arterial occlusion            | Gastrointestinal vascular occlusion and infarction | Gastrointestinal vascular conditions                            | Gastrointestinal disorders                           |
| Mesenteric artery embolism               | Gastrointestinal vascular occlusion and infarction | Gastrointestinal vascular conditions                            | Gastrointestinal disorders                           |
| Mesenteric artery stenosis               | Gastrointestinal vascular occlusion and infarction | Gastrointestinal vascular conditions                            | Gastrointestinal disorders                           |
| Mesenteric artery thrombosis             | Gastrointestinal vascular occlusion and infarction | Gastrointestinal vascular conditions                            | Gastrointestinal disorders                           |
| Mesenteric vascular insufficiency        | Gastrointestinal vascular occlusion and infarction | Gastrointestinal vascular conditions                            | Gastrointestinal disorders                           |
| Mesenteric vein thrombosis               | Gastrointestinal vascular occlusion and infarction | Gastrointestinal vascular conditions                            | Gastrointestinal disorders                           |
| Mesenteric venous occlusion              | Gastrointestinal vascular occlusion and infarction | Gastrointestinal vascular conditions                            | Gastrointestinal disorders                           |
| Monoparesis                              | Paralysis and paresis (excl cranial nerve)         | Movement disorders (incl parkinsonism)                          | Nervous system disorders                             |
| Monoplegia                               | Paralysis and paresis (excl cranial nerve)         | Movement disorders (incl parkinsonism)                          | Nervous system disorders                             |
| Moyamoya disease                         | Central nervous system vascular disorders NEC      | Central nervous system vascular disorders                       | Nervous system disorders                             |
| Multi-organ failure                      | General signs and symptoms NEC                     | General system disorders NEC                                    | General disorders and administration site conditions |
| Multiple gated acquisition scan abnormal | Cardiac function diagnostic procedures             | Cardiac and vascular investigations (excl enzyme tests)         | Investigations                                       |

|                                |                                             |                                                |                                                      |
|--------------------------------|---------------------------------------------|------------------------------------------------|------------------------------------------------------|
| Myocardial fibrosis            | Myocardial disorders NEC                    | Myocardial disorders                           | Cardiac disorders                                    |
| Myocardial infarction          | Ischaemic coronary artery disorders         | Coronary artery disorders                      | Cardiac disorders                                    |
| Myocardial ischaemia           | Ischaemic coronary artery disorders         | Coronary artery disorders                      | Cardiac disorders                                    |
| Myocardial necrosis            | Myocardial disorders NEC                    | Myocardial disorders                           | Cardiac disorders                                    |
| Myocarditis                    | Noninfectious myocarditis                   | Myocardial disorders                           | Cardiac disorders                                    |
| Myocarditis meningococcal      | Neisseria infections                        | Bacterial infectious disorders                 | Infections and infestations                          |
| Myocarditis septic             | Bacterial infections NEC                    | Bacterial infectious disorders                 | Infections and infestations                          |
| Myocarditis syphilitic         | Treponema infections                        | Bacterial infectious disorders                 | Infections and infestations                          |
| Myocarditis toxoplasmal        | Toxoplasma infections                       | Protozoal infectious disorders                 | Infections and infestations                          |
| Myoglobinuria                  | Urinary abnormalities                       | Urinary tract signs and symptoms               | Renal and urinary disorders                          |
| Neonatal respiratory failure   | Neonatal hypoxic conditions                 | Neonatal respiratory disorders                 | Respiratory, thoracic and mediastinal disorders      |
| Nocturia                       | Urinary tract signs and symptoms NEC        | Urinary tract signs and symptoms               | Renal and urinary disorders                          |
| Nodal arrhythmia               | Rate and rhythm disorders NEC               | Cardiac arrhythmias                            | Cardiac disorders                                    |
| Nodal rhythm                   | Rate and rhythm disorders NEC               | Cardiac arrhythmias                            | Cardiac disorders                                    |
| Nodular vasculitis             | Skin vasculitides                           | Skin vascular abnormalities                    | Skin and subcutaneous tissue disorders               |
| Obstetrical pulmonary embolism | Pulmonary thrombotic and embolic conditions | Pulmonary vascular disorders                   | Respiratory, thoracic and mediastinal disorders      |
| Oedema                         | Oedema NEC                                  | General system disorders NEC                   | General disorders and administration site conditions |
| Oedema peripheral              | Oedema NEC                                  | General system disorders NEC                   | General disorders and administration site conditions |
| Optic nerve infarction         | Optic nerve bleeding and vascular disorders | Ocular haemorrhages and vascular disorders NEC | Eye disorders                                        |
| Orthopnoea                     | Breathing abnormalities                     | Respiratory disorders NEC                      | Respiratory, thoracic and mediastinal disorders      |

|                              |                                                                   |                                                                  |                                                 |
|------------------------------|-------------------------------------------------------------------|------------------------------------------------------------------|-------------------------------------------------|
| Orthostatic hypotension      | Vascular hypotensive disorders                                    | Decreased and nonspecific blood pressure disorders and shock     | Vascular disorders                              |
| Palpitations                 | Cardiac signs and symptoms NEC                                    | Cardiac disorder signs and symptoms                              | Cardiac disorders                               |
| Papillary muscle infarction  | Ischaemic coronary artery disorders                               | Coronary artery disorders                                        | Cardiac disorders                               |
| Paralysis                    | Paralysis and paresis (excl cranial nerve)                        | Movement disorders (incl parkinsonism)                           | Nervous system disorders                        |
| Paralysis flaccid            | Paralysis and paresis (excl cranial nerve)                        | Movement disorders (incl parkinsonism)                           | Nervous system disorders                        |
| Paraparesis                  | Paralysis and paresis (excl cranial nerve)                        | Movement disorders (incl parkinsonism)                           | Nervous system disorders                        |
| Paraplegia                   | Paralysis and paresis (excl cranial nerve)                        | Movement disorders (incl parkinsonism)                           | Nervous system disorders                        |
| Parasystole                  | Rate and rhythm disorders NEC                                     | Cardiac arrhythmias                                              | Cardiac disorders                               |
| Paresis                      | Paralysis and paresis (excl cranial nerve)                        | Movement disorders (incl parkinsonism)                           | Nervous system disorders                        |
| Pelvic venous thrombosis     | Peripheral embolism and thrombosis                                | Embolism and thrombosis                                          | Vascular disorders                              |
| Penile vein thrombosis       | Penile disorders NEC (excl erection and ejaculation)              | Penile and scrotal disorders (excl infections and inflammations) | Reproductive system and breast disorders        |
| Pituitary infarction         | Hypothalamic and pituitary disorders NEC                          | Hypothalamus and pituitary gland disorders                       | Endocrine disorders                             |
| Plasma viscosity abnormal    | Haematological analyses NEC                                       | Haematology investigations (incl blood groups)                   | Investigations                                  |
| Polyarteritis nodosa         | Vasculitides NEC                                                  | Vascular inflammations                                           | Vascular disorders                              |
| Polymyalgia rheumatica       | Connective tissue disorders NEC                                   | Connective tissue disorders (excl congenital)                    | Musculoskeletal and connective tissue disorders |
| Portal shunt                 | Hepatic therapeutic procedures                                    | Hepatobiliary therapeutic procedures                             | Surgical and medical procedures                 |
| Portal vein thrombosis       | Hepatic vascular disorders                                        | Hepatic and hepatobiliary disorders                              | Hepatobiliary disorders                         |
| Postpartum venous thrombosis | Non-site specific embolism and thrombosis                         | Embolism and thrombosis                                          | Vascular disorders                              |
| Precerebral artery occlusion | Central nervous system haemorrhages and cerebrovascular accidents | Central nervous system vascular disorders                        | Nervous system disorders                        |

|                                             |                                                                 |                                                                    |                                                 |
|---------------------------------------------|-----------------------------------------------------------------|--------------------------------------------------------------------|-------------------------------------------------|
| Prinzmetal angina                           | Ischaemic coronary artery disorders                             | Coronary artery disorders                                          | Cardiac disorders                               |
| Pulmonary arterial wedge pressure increased | Cardiac function diagnostic procedures                          | Cardiac and vascular investigations (excl enzyme tests)            | Investigations                                  |
| Pulmonary artery thrombosis                 | Pulmonary thrombotic and embolic conditions                     | Pulmonary vascular disorders                                       | Respiratory, thoracic and mediastinal disorders |
| Pulmonary congestion                        | Pulmonary oedemas                                               | Lower respiratory tract disorders (excl obstruction and infection) | Respiratory, thoracic and mediastinal disorders |
| Pulmonary embolism                          | Pulmonary thrombotic and embolic conditions                     | Pulmonary vascular disorders                                       | Respiratory, thoracic and mediastinal disorders |
| Pulmonary infarction                        | Pulmonary thrombotic and embolic conditions                     | Pulmonary vascular disorders                                       | Respiratory, thoracic and mediastinal disorders |
| Pulmonary microemboli                       | Pulmonary thrombotic and embolic conditions                     | Pulmonary vascular disorders                                       | Respiratory, thoracic and mediastinal disorders |
| Pulmonary oedema                            | Pulmonary oedemas                                               | Lower respiratory tract disorders (excl obstruction and infection) | Respiratory, thoracic and mediastinal disorders |
| Pulmonary thrombosis                        | Pulmonary thrombotic and embolic conditions                     | Pulmonary vascular disorders                                       | Respiratory, thoracic and mediastinal disorders |
| Pulmonary vasculitis                        | Lower respiratory tract inflammatory and immunologic conditions | Lower respiratory tract disorders (excl obstruction and infection) | Respiratory, thoracic and mediastinal disorders |
| Pulmonary veno-occlusive disease            | Vascular pulmonary disorders NEC                                | Pulmonary vascular disorders                                       | Respiratory, thoracic and mediastinal disorders |
| Pulmonary venous thrombosis                 | Pulmonary thrombotic and embolic conditions                     | Pulmonary vascular disorders                                       | Respiratory, thoracic and mediastinal disorders |
| Pulse absent                                | Heart rate and pulse investigations                             | Cardiac and vascular investigations (excl enzyme tests)            | Investigations                                  |
| Quadriplegia                                | Paralysis and paresis (excl cranial nerve)                      | Movement disorders (incl parkinsonism)                             | Nervous system disorders                        |
| Red blood cells CSF positive                | Cerebrospinal fluid tests (excl microbiology)                   | Neurological, special senses and psychiatric investigations        | Investigations                                  |
| Renal arteritis                             | Renal vascular and ischaemic conditions                         | Renal disorders (excl nephropathies)                               | Renal and urinary disorders                     |
| Renal artery thrombosis                     | Renal vascular and ischaemic conditions                         | Renal disorders (excl nephropathies)                               | Renal and urinary disorders                     |

|                            |                                                            |                                                                  |                                                 |
|----------------------------|------------------------------------------------------------|------------------------------------------------------------------|-------------------------------------------------|
| Renal failure              | Renal failure and impairment                               | Renal disorders (excl nephropathies)                             | Renal and urinary disorders                     |
| Renal failure acute        | Renal failure and impairment                               | Renal disorders (excl nephropathies)                             | Renal and urinary disorders                     |
| Renal failure neonatal     | Renal failure and impairment                               | Renal disorders (excl nephropathies)                             | Renal and urinary disorders                     |
| Renal infarct              | Renal vascular and ischaemic conditions                    | Renal disorders (excl nephropathies)                             | Renal and urinary disorders                     |
| Renal vasculitis           | Renal vascular and ischaemic conditions                    | Renal disorders (excl nephropathies)                             | Renal and urinary disorders                     |
| Renal vein embolism        | Renal vascular and ischaemic conditions                    | Renal disorders (excl nephropathies)                             | Renal and urinary disorders                     |
| Renal vein thrombosis      | Renal vascular and ischaemic conditions                    | Renal disorders (excl nephropathies)                             | Renal and urinary disorders                     |
| Respiratory failure        | Respiratory failures (excl neonatal)                       | Respiratory disorders NEC                                        | Respiratory, thoracic and mediastinal disorders |
| Restrictive cardiomyopathy | Cardiomyopathies                                           | Myocardial disorders                                             | Cardiac disorders                               |
| Retinal artery embolism    | Retinal bleeding and vascular disorders (excl retinopathy) | Retina, choroid and vitreous haemorrhages and vascular disorders | Eye disorders                                   |
| Retinal artery occlusion   | Retinal bleeding and vascular disorders (excl retinopathy) | Retina, choroid and vitreous haemorrhages and vascular disorders | Eye disorders                                   |
| Retinal artery thrombosis  | Retinal bleeding and vascular disorders (excl retinopathy) | Retina, choroid and vitreous haemorrhages and vascular disorders | Eye disorders                                   |
| Retinal vasculitis         | Retinal, choroid and vitreous infections and inflammations | Ocular infections, irritations and inflammations                 | Eye disorders                                   |
| Retinal vein occlusion     | Retinal bleeding and vascular disorders (excl retinopathy) | Retina, choroid and vitreous haemorrhages and vascular disorders | Eye disorders                                   |
| Retinal vein thrombosis    | Retinal bleeding and vascular disorders (excl retinopathy) | Retina, choroid and vitreous haemorrhages and vascular disorders | Eye disorders                                   |
| Rhythm idioventricular     | Ventricular arrhythmias and cardiac arrest                 | Cardiac arrhythmias                                              | Cardiac disorders                               |
| Right ventricular failure  | Right ventricular failures                                 | Heart failures                                                   | Cardiac disorders                               |

|                                  |                                                                   |                                                              |                                                |
|----------------------------------|-------------------------------------------------------------------|--------------------------------------------------------------|------------------------------------------------|
| Ruptured cerebral aneurysm       | Central nervous system haemorrhages and cerebrovascular accidents | Central nervous system vascular disorders                    | Nervous system disorders                       |
| Septic shock                     | Sepsis, bacteraemia, viraemia and fungaemia NEC                   | Infections - pathogen unspecified                            | Infections and infestations                    |
| Shock                            | Circulatory collapse and shock                                    | Decreased and nonspecific blood pressure disorders and shock | Vascular disorders                             |
| Shock hypoglycaemic              | Hypoglycaemic conditions NEC                                      | Glucose metabolism disorders (incl diabetes mellitus)        | Metabolism and nutrition disorders             |
| Shunt occlusion                  | Non-site specific procedural complications                        | Procedural related injuries and complications NEC            | Injury, poisoning and procedural complications |
| Sick sinus syndrome              | Supraventricular arrhythmias                                      | Cardiac arrhythmias                                          | Cardiac disorders                              |
| Sinoatrial block                 | Cardiac conduction disorders                                      | Cardiac arrhythmias                                          | Cardiac disorders                              |
| Sinus arrest                     | Supraventricular arrhythmias                                      | Cardiac arrhythmias                                          | Cardiac disorders                              |
| Sinus arrhythmia                 | Supraventricular arrhythmias                                      | Cardiac arrhythmias                                          | Cardiac disorders                              |
| Sinus bradycardia                | Supraventricular arrhythmias                                      | Cardiac arrhythmias                                          | Cardiac disorders                              |
| Sinus tachycardia                | Supraventricular arrhythmias                                      | Cardiac arrhythmias                                          | Cardiac disorders                              |
| Spastic paralysis                | Paralysis and paresis (excl cranial nerve)                        | Movement disorders (incl parkinsonism)                       | Nervous system disorders                       |
| Spinal vessel congenital anomaly | Vascular anomalies congenital NEC                                 | Cardiac and vascular disorders congenital                    | Congenital, familial and genetic disorders     |
| Splenic infarction               | Spleen disorders                                                  | Spleen, lymphatic and reticuloendothelial system disorders   | Blood and lymphatic system disorders           |
| Splenic vein thrombosis          | Spleen disorders                                                  | Spleen, lymphatic and reticuloendothelial system disorders   | Blood and lymphatic system disorders           |
| Stroke volume decreased          | Cardiac function diagnostic procedures                            | Cardiac and vascular investigations (excl enzyme tests)      | Investigations                                 |
| Subarachnoid haemorrhage         | Central nervous system haemorrhages and cerebrovascular accidents | Central nervous system vascular disorders                    | Nervous system disorders                       |

|                                    |                                                                   |                                                                 |                                                      |
|------------------------------------|-------------------------------------------------------------------|-----------------------------------------------------------------|------------------------------------------------------|
| Subarachnoid haemorrhage neonatal  | Central nervous system haemorrhages and cerebrovascular accidents | Central nervous system vascular disorders                       | Nervous system disorders                             |
| Subclavian artery embolism         | Peripheral embolism and thrombosis                                | Embolism and thrombosis                                         | Vascular disorders                                   |
| Subclavian artery thrombosis       | Peripheral embolism and thrombosis                                | Embolism and thrombosis                                         | Vascular disorders                                   |
| Subclavian steal syndrome          | Site specific vascular disorders NEC                              | Vascular disorders NEC                                          | Vascular disorders                                   |
| Subdural haematoma                 | Cerebral injuries NEC                                             | Injuries NEC                                                    | Injury, poisoning and procedural complications       |
| Subdural haematoma evacuation      | Skull and brain therapeutic procedures                            | Nervous system, skull and spine therapeutic procedures          | Surgical and medical procedures                      |
| Subdural haemorrhage               | Cerebral injuries NEC                                             | Injuries NEC                                                    | Injury, poisoning and procedural complications       |
| Subdural haemorrhage neonatal      | Central nervous system haemorrhages and cerebrovascular accidents | Central nervous system vascular disorders                       | Nervous system disorders                             |
| Sudden death                       | Death and sudden death                                            | Fatal outcomes                                                  | General disorders and administration site conditions |
| Superior sagittal sinus thrombosis | Cerebrovascular venous and sinus thrombosis                       | Central nervous system vascular disorders                       | Nervous system disorders                             |
| Superior vena cava syndrome        | Site specific necrosis and vascular insufficiency NEC             | Arteriosclerosis, stenosis, vascular insufficiency and necrosis | Vascular disorders                                   |
| Supraventricular extrasystoles     | Supraventricular arrhythmias                                      | Cardiac arrhythmias                                             | Cardiac disorders                                    |
| Supraventricular tachycardia       | Supraventricular arrhythmias                                      | Cardiac arrhythmias                                             | Cardiac disorders                                    |
| Syncope                            | Disturbances in consciousness NEC                                 | Neurological disorders NEC                                      | Nervous system disorders                             |
| Tachycardia                        | Rate and rhythm disorders NEC                                     | Cardiac arrhythmias                                             | Cardiac disorders                                    |
| Tachycardia foetal                 | Rate and rhythm disorders NEC                                     | Cardiac arrhythmias                                             | Cardiac disorders                                    |
| Tachycardia paroxysmal             | Rate and rhythm disorders NEC                                     | Cardiac arrhythmias                                             | Cardiac disorders                                    |
| Takayasu's arteritis               | Arterial inflammations                                            | Vascular inflammations                                          | Vascular disorders                                   |

|                                     |                                                                   |                                                               |                                          |
|-------------------------------------|-------------------------------------------------------------------|---------------------------------------------------------------|------------------------------------------|
| Temporal arteritis                  | Arterial inflammations                                            | Vascular inflammations                                        | Vascular disorders                       |
| Testicular infarction               | Testicular and epididymal disorders NEC                           | Testicular and epididymal disorders                           | Reproductive system and breast disorders |
| Thrombectomy                        | Vascular therapeutic procedures NEC                               | Vascular therapeutic procedures                               | Surgical and medical procedures          |
| Thromboangiitis obliterans          | Vasculitides NEC                                                  | Vascular inflammations                                        | Vascular disorders                       |
| Thrombolysis                        | Haematological therapeutic procedures NEC                         | Haematological and lymphoid tissue therapeutic procedures     | Surgical and medical procedures          |
| Thrombophlebitis                    | Peripheral embolism and thrombosis                                | Embolism and thrombosis                                       | Vascular disorders                       |
| Thrombophlebitis migrans            | Non-site specific embolism and thrombosis                         | Embolism and thrombosis                                       | Vascular disorders                       |
| Thrombophlebitis neonatal           | Non-site specific embolism and thrombosis                         | Embolism and thrombosis                                       | Vascular disorders                       |
| Thrombophlebitis superficial        | Peripheral embolism and thrombosis                                | Embolism and thrombosis                                       | Vascular disorders                       |
| Thrombosed varicose vein            | Varicose veins non-site specific                                  | Venous varices                                                | Vascular disorders                       |
| Thrombosis                          | Non-site specific embolism and thrombosis                         | Embolism and thrombosis                                       | Vascular disorders                       |
| Thrombosis mesenteric vessel        | Gastrointestinal vascular occlusion and infarction                | Gastrointestinal vascular conditions                          | Gastrointestinal disorders               |
| Thrombosis prophylaxis              | Prophylactic procedures NEC                                       | Therapeutic procedures and supportive care NEC                | Surgical and medical procedures          |
| Thrombotic microangiopathy          | Coagulopathies                                                    | Coagulopathies and bleeding diatheses (excl thrombocytopenic) | Blood and lymphatic system disorders     |
| Thrombotic stroke                   | Central nervous system haemorrhages and cerebrovascular accidents | Central nervous system vascular disorders                     | Nervous system disorders                 |
| Thrombotic thrombocytopenic purpura | Thrombocytopenias                                                 | Platelet disorders                                            | Blood and lymphatic system disorders     |
| Thyroid infarction                  | Thyroid disorders NEC                                             | Thyroid gland disorders                                       | Endocrine disorders                      |
| Torsade de pointes                  | Ventricular arrhythmias and cardiac arrest                        | Cardiac arrhythmias                                           | Cardiac disorders                        |
| Toxic shock syndrome                | Infections NEC                                                    | Infections - pathogen unspecified                             | Infections and infestations              |



|                                   |                                               |                                                         |                                                                     |
|-----------------------------------|-----------------------------------------------|---------------------------------------------------------|---------------------------------------------------------------------|
| Transient ischaemic attack        | Transient cerebrovascular events              | Central nervous system vascular disorders               | Nervous system disorders                                            |
| Transverse sinus thrombosis       | Cerebrovascular venous and sinus thrombosis   | Central nervous system vascular disorders               | Nervous system disorders                                            |
| Trifascicular block               | Cardiac conduction disorders                  | Cardiac arrhythmias                                     | Cardiac disorders                                                   |
| Tumour embolism                   | Oncologic complications and emergencies       | Neoplasm related morbidities                            | Neoplasms benign, malignant and unspecified (incl cysts and polyps) |
| Ultrasound Doppler abnormal       | Vascular imaging procedures NEC               | Cardiac and vascular investigations (excl enzyme tests) | Investigations                                                      |
| Vascular purpura                  | Purpura and related conditions                | Skin vascular abnormalities                             | Skin and subcutaneous tissue disorders                              |
| Vasculitic rash                   | Skin vasculitides                             | Skin vascular abnormalities                             | Skin and subcutaneous tissue disorders                              |
| Vasculitis                        | Vasculitides NEC                              | Vascular inflammations                                  | Vascular disorders                                                  |
| Vasculitis cerebral               | Central nervous system vascular disorders NEC | Central nervous system vascular disorders               | Nervous system disorders                                            |
| Vasculitis necrotising            | Vasculitides NEC                              | Vascular inflammations                                  | Vascular disorders                                                  |
| Vena cava embolism                | Vena caval embolism and thrombosis            | Embolism and thrombosis                                 | Vascular disorders                                                  |
| Vena cava thrombosis              | Vena caval embolism and thrombosis            | Embolism and thrombosis                                 | Vascular disorders                                                  |
| Venogram abnormal                 | Vascular imaging procedures NEC               | Cardiac and vascular investigations (excl enzyme tests) | Investigations                                                      |
| Venoocclusive liver disease       | Hepatic vascular disorders                    | Hepatic and hepatobiliary disorders                     | Hepatobiliary disorders                                             |
| Venous pressure increased         | Vascular tests NEC (incl blood pressure)      | Cardiac and vascular investigations (excl enzyme tests) | Investigations                                                      |
| Venous pressure jugular abnormal  | Cardiac function diagnostic procedures        | Cardiac and vascular investigations (excl enzyme tests) | Investigations                                                      |
| Venous pressure jugular increased | Cardiac function diagnostic procedures        | Cardiac and vascular investigations (excl enzyme tests) | Investigations                                                      |

|                                    |                                                                   |                                           |                             |
|------------------------------------|-------------------------------------------------------------------|-------------------------------------------|-----------------------------|
| Venous thrombosis                  | Non-site specific embolism and thrombosis                         | Embolism and thrombosis                   | Vascular disorders          |
| Ventricular arrhythmia             | Ventricular arrhythmias and cardiac arrest                        | Cardiac arrhythmias                       | Cardiac disorders           |
| Ventricular asystole               | Ventricular arrhythmias and cardiac arrest                        | Cardiac arrhythmias                       | Cardiac disorders           |
| Ventricular extrasystoles          | Ventricular arrhythmias and cardiac arrest                        | Cardiac arrhythmias                       | Cardiac disorders           |
| Ventricular fibrillation           | Ventricular arrhythmias and cardiac arrest                        | Cardiac arrhythmias                       | Cardiac disorders           |
| Ventricular flutter                | Ventricular arrhythmias and cardiac arrest                        | Cardiac arrhythmias                       | Cardiac disorders           |
| Ventricular hypertrophy            | Myocardial disorders NEC                                          | Myocardial disorders                      | Cardiac disorders           |
| Ventricular septal defect acquired | Myocardial disorders NEC                                          | Myocardial disorders                      | Cardiac disorders           |
| Ventricular tachycardia            | Ventricular arrhythmias and cardiac arrest                        | Cardiac arrhythmias                       | Cardiac disorders           |
| Vertebral artery stenosis          | Central nervous system vascular disorders NEC                     | Central nervous system vascular disorders | Nervous system disorders    |
| Vertebrobasilar insufficiency      | Central nervous system vascular disorders NEC                     | Central nervous system vascular disorders | Nervous system disorders    |
| Viral myocarditis                  | Viral infections NEC                                              | Viral infectious disorders                | Infections and infestations |
| Visual acuity reduced transiently  | Partial vision loss                                               | Vision disorders                          | Eye disorders               |
| Wandering pacemaker                | Supraventricular arrhythmias                                      | Cardiac arrhythmias                       | Cardiac disorders           |
| Withdrawal arrhythmia              | Rate and rhythm disorders NEC                                     | Cardiac arrhythmias                       | Cardiac disorders           |
| Wolff-Parkinson-White syndrome     | Cardiac conduction disorders                                      | Cardiac arrhythmias                       | Cardiac disorders           |
| Mental status changes              | Mental disorders NEC                                              | Psychiatric disorders NEC                 | Psychiatric disorders       |
| Vasculitis gastrointestinal        | Gastrointestinal inflammatory disorders NEC                       | Gastrointestinal inflammatory conditions  | Gastrointestinal disorders  |
| Cardiomyopathy acute               | Cardiomyopathies                                                  | Myocardial disorders                      | Cardiac disorders           |
| Spinal haematoma                   | Central nervous system haemorrhages and cerebrovascular accidents | Central nervous system vascular disorders | Nervous system disorders    |

|                                 |                                                                   |                                           |                                 |
|---------------------------------|-------------------------------------------------------------------|-------------------------------------------|---------------------------------|
| Post thrombotic syndrome        | Non-site specific embolism and thrombosis                         | Embolism and thrombosis                   | Vascular disorders              |
| Allergic granulomatous angiitis | Vasculitides                                                      | Immune disorders NEC                      | Immune system disorders         |
| Cardiotoxicity                  | Cardiac disorders NEC                                             | Cardiac disorder signs and symptoms       | Cardiac disorders               |
| Intracardiac thrombus           | Cardiac disorders NEC                                             | Cardiac disorder signs and symptoms       | Cardiac disorders               |
| Atrial hypertrophy              | Myocardial disorders NEC                                          | Myocardial disorders                      | Cardiac disorders               |
| Rheumatoid vasculitis           | Vasculitides NEC                                                  | Vascular inflammations                    | Vascular disorders              |
| Coronary artery dissection      | Coronary artery disorders NEC                                     | Coronary artery disorders                 | Cardiac disorders               |
| Atrial thrombosis               | Cardiac disorders NEC                                             | Cardiac disorder signs and symptoms       | Cardiac disorders               |
| Agnosia                         | Cortical dysfunction NEC                                          | Neurological disorders NEC                | Nervous system disorders        |
| Spastic paraplegia              | Paralysis and paresis (excl cranial nerve)                        | Movement disorders (incl parkinsonism)    | Nervous system disorders        |
| Myocardial haemorrhage          | Myocardial disorders NEC                                          | Myocardial disorders                      | Cardiac disorders               |
| Ischaemic cardiomyopathy        | Cardiomyopathies                                                  | Myocardial disorders                      | Cardiac disorders               |
| Phlebectomy                     | Venous therapeutic procedures                                     | Vascular therapeutic procedures           | Surgical and medical procedures |
| Vena cava filter insertion      | Venous therapeutic procedures                                     | Vascular therapeutic procedures           | Surgical and medical procedures |
| Basilar artery occlusion        | Central nervous system haemorrhages and cerebrovascular accidents | Central nervous system vascular disorders | Nervous system disorders        |
| Carotid artery occlusion        | Central nervous system haemorrhages and cerebrovascular accidents | Central nervous system vascular disorders | Nervous system disorders        |
| Vertebral artery occlusion      | Central nervous system haemorrhages and cerebrovascular accidents | Central nervous system vascular disorders | Nervous system disorders        |
| Cardiac pseudoaneurysm          | Myocardial disorders NEC                                          | Myocardial disorders                      | Cardiac disorders               |
| Renal artery occlusion          | Renal vascular and ischaemic conditions                           | Renal disorders (excl nephropathies)      | Renal and urinary disorders     |

|                                           |                                                                   |                                                         |                                                      |
|-------------------------------------------|-------------------------------------------------------------------|---------------------------------------------------------|------------------------------------------------------|
| Spinal cord haemorrhage                   | Spinal cord and nerve root disorders NEC                          | Spinal cord and nerve root disorders                    | Nervous system disorders                             |
| Accelerated idioventricular rhythm        | Ventricular arrhythmias and cardiac arrest                        | Cardiac arrhythmias                                     | Cardiac disorders                                    |
| Vascular graft occlusion                  | Transplantation complications                                     | Procedural related injuries and complications NEC       | Injury, poisoning and procedural complications       |
| Vascular operation                        | Vascular therapeutic procedures NEC                               | Vascular therapeutic procedures                         | Surgical and medical procedures                      |
| Cerebrovascular accident prophylaxis      | Prophylactic procedures NEC                                       | Therapeutic procedures and supportive care NEC          | Surgical and medical procedures                      |
| Electrocardiogram ST-T segment depression | ECG investigations                                                | Cardiac and vascular investigations (excl enzyme tests) | Investigations                                       |
| Electrocardiogram ST-T segment elevation  | ECG investigations                                                | Cardiac and vascular investigations (excl enzyme tests) | Investigations                                       |
| Nocturnal dyspnoea                        | Breathing abnormalities                                           | Respiratory disorders NEC                               | Respiratory, thoracic and mediastinal disorders      |
| Spinal epidural haemorrhage               | Central nervous system haemorrhages and cerebrovascular accidents | Central nervous system vascular disorders               | Nervous system disorders                             |
| Wolff-Parkinson-White syndrome congenital | Cardiac disorders congenital NEC                                  | Cardiac and vascular disorders congenital               | Congenital, familial and genetic disorders           |
| Sudden cardiac death                      | Death and sudden death                                            | Fatal outcomes                                          | General disorders and administration site conditions |
| Peripartum cardiomyopathy                 | Pregnancy complicated by maternal disorders                       | Maternal complications of pregnancy                     | Pregnancy, puerperium and perinatal conditions       |
| Spinal artery embolism                    | Central nervous system vascular disorders NEC                     | Central nervous system vascular disorders               | Nervous system disorders                             |
| Subclavian vein thrombosis                | Peripheral embolism and thrombosis                                | Embolism and thrombosis                                 | Vascular disorders                                   |
| Tachyarrhythmia                           | Rate and rhythm disorders NEC                                     | Cardiac arrhythmias                                     | Cardiac disorders                                    |
| Oedema due to cardiac disease             | Oedema NEC                                                        | General system disorders NEC                            | General disorders and administration site conditions |
| Quadriplegia                              | Paralysis and paresis (excl cranial nerve)                        | Movement disorders (incl parkinsonism)                  | Nervous system disorders                             |
| Left ventricular dysfunction              | Myocardial disorders NEC                                          | Myocardial disorders                                    | Cardiac disorders                                    |

|                                |                                                                   |                                                              |                                                      |
|--------------------------------|-------------------------------------------------------------------|--------------------------------------------------------------|------------------------------------------------------|
| Pituitary haemorrhage          | Hypothalamic and pituitary disorders NEC                          | Hypothalamus and pituitary gland disorders                   | Endocrine disorders                                  |
| Ventricular pre-excitation     | Ventricular arrhythmias and cardiac arrest                        | Cardiac arrhythmias                                          | Cardiac disorders                                    |
| Bradyarrhythmia                | Rate and rhythm disorders NEC                                     | Cardiac arrhythmias                                          | Cardiac disorders                                    |
| Silent myocardial infarction   | Ischaemic coronary artery disorders                               | Coronary artery disorders                                    | Cardiac disorders                                    |
| Shock haemorrhagic             | Circulatory collapse and shock                                    | Decreased and nonspecific blood pressure disorders and shock | Vascular disorders                                   |
| Neonatal tachycardia           | Rate and rhythm disorders NEC                                     | Cardiac arrhythmias                                          | Cardiac disorders                                    |
| Neonatal anuria                | Renal failure and impairment                                      | Renal disorders (excl nephropathies)                         | Renal and urinary disorders                          |
| Peripheral oedema neonatal     | Oedema NEC                                                        | General system disorders NEC                                 | General disorders and administration site conditions |
| Neonatal cardiac failure       | Heart failures NEC                                                | Heart failures                                               | Cardiac disorders                                    |
| Atrial pressure increased      | Cardiac function diagnostic procedures                            | Cardiac and vascular investigations (excl enzyme tests)      | Investigations                                       |
| Non-obstructive cardiomyopathy | Cardiomyopathies                                                  | Myocardial disorders                                         | Cardiac disorders                                    |
| Bone infarction                | Bone disorders NEC                                                | Bone disorders (excl congenital and fractures)               | Musculoskeletal and connective tissue disorders      |
| Cardio-respiratory distress    | Heart failures NEC                                                | Heart failures                                               | Cardiac disorders                                    |
| Coronary revascularisation     | Arterial therapeutic procedures (excl aortic)                     | Vascular therapeutic procedures                              | Surgical and medical procedures                      |
| Cardiac death                  | Death and sudden death                                            | Fatal outcomes                                               | General disorders and administration site conditions |
| Paroxysmal arrhythmia          | Rate and rhythm disorders NEC                                     | Cardiac arrhythmias                                          | Cardiac disorders                                    |
| Cardiomyopathy neonatal        | Cardiomyopathies                                                  | Myocardial disorders                                         | Cardiac disorders                                    |
| Cerebral haemorrhage foetal    | Central nervous system haemorrhages and cerebrovascular accidents | Central nervous system vascular disorders                    | Nervous system disorders                             |
| Spinal epidural haematoma      | Central nervous system haemorrhages and                           | Central nervous system vascular disorders                    | Nervous system disorders                             |

|                                                          |                                                                   |                                                                    |                                                      |
|----------------------------------------------------------|-------------------------------------------------------------------|--------------------------------------------------------------------|------------------------------------------------------|
|                                                          | cerebrovascular accidents                                         |                                                                    |                                                      |
| Spinal subdural haematoma                                | Central nervous system haemorrhages and cerebrovascular accidents | Central nervous system vascular disorders                          | Nervous system disorders                             |
| Paget-Schroetter syndrome                                | Peripheral embolism and thrombosis                                | Embolism and thrombosis                                            | Vascular disorders                                   |
| Coronary angioplasty                                     | Arterial therapeutic procedures (excl aortic)                     | Vascular therapeutic procedures                                    | Surgical and medical procedures                      |
| Electrocardiogram T wave abnormal                        | ECG investigations                                                | Cardiac and vascular investigations (excl enzyme tests)            | Investigations                                       |
| Electrocardiogram P wave abnormal                        | ECG investigations                                                | Cardiac and vascular investigations (excl enzyme tests)            | Investigations                                       |
| Neonatal multi-organ failure                             | General signs and symptoms NEC                                    | General system disorders NEC                                       | General disorders and administration site conditions |
| Carotid artery dissection                                | Central nervous system aneurysms and dissections                  | Central nervous system vascular disorders                          | Nervous system disorders                             |
| Pulmonary oedema neonatal                                | Pulmonary oedemas                                                 | Lower respiratory tract disorders (excl obstruction and infection) | Respiratory, thoracic and mediastinal disorders      |
| Reversible ischaemic neurological deficit                | Transient cerebrovascular events                                  | Central nervous system vascular disorders                          | Nervous system disorders                             |
| Ventricular hypokinesia                                  | Myocardial disorders NEC                                          | Myocardial disorders                                               | Cardiac disorders                                    |
| Ejection fraction decreased                              | Cardiac function diagnostic procedures                            | Cardiac and vascular investigations (excl enzyme tests)            | Investigations                                       |
| Anti-neutrophil cytoplasmic antibody positive vasculitis | Vasculitides                                                      | Immune disorders NEC                                               | Immune system disorders                              |
| Increased ventricular preload                            | Cardiac function diagnostic procedures                            | Cardiac and vascular investigations (excl enzyme tests)            | Investigations                                       |
| Postoperative thrombosis                                 | Non-site specific procedural complications                        | Procedural related injuries and complications NEC                  | Injury, poisoning and procedural complications       |
| Decreased ventricular preload                            | Cardiac function diagnostic procedures                            | Cardiac and vascular investigations (excl enzyme tests)            | Investigations                                       |

|                                        |                                                                   |                                                                  |                                                      |
|----------------------------------------|-------------------------------------------------------------------|------------------------------------------------------------------|------------------------------------------------------|
| Homans' sign positive                  | Vascular tests NEC (incl blood pressure)                          | Cardiac and vascular investigations (excl enzyme tests)          | Investigations                                       |
| Deep vein thrombosis                   | Peripheral embolism and thrombosis                                | Embolism and thrombosis                                          | Vascular disorders                                   |
| Lacunar infarction                     | Central nervous system haemorrhages and cerebrovascular accidents | Central nervous system vascular disorders                        | Nervous system disorders                             |
| Cardiopulmonary failure                | Heart failures NEC                                                | Heart failures                                                   | Cardiac disorders                                    |
| Blood pressure inadequately controlled | Blood pressure disorders NEC                                      | Decreased and nonspecific blood pressure disorders and shock     | Vascular disorders                                   |
| Electrocardiogram Q wave abnormal      | ECG investigations                                                | Cardiac and vascular investigations (excl enzyme tests)          | Investigations                                       |
| Graft thrombosis                       | Transplantation complications                                     | Procedural related injuries and complications NEC                | Injury, poisoning and procedural complications       |
| Blood viscosity increased              | Haematological analyses NEC                                       | Haematology investigations (incl blood groups)                   | Investigations                                       |
| Carotid aneurysm rupture               | Central nervous system haemorrhages and cerebrovascular accidents | Central nervous system vascular disorders                        | Nervous system disorders                             |
| Hepatojugular reflux                   | Heart failure signs and symptoms                                  | Heart failures                                                   | Cardiac disorders                                    |
| Acute coronary syndrome                | Ischaemic coronary artery disorders                               | Coronary artery disorders                                        | Cardiac disorders                                    |
| Myocardial reperfusion injury          | Ischaemic coronary artery disorders                               | Coronary artery disorders                                        | Cardiac disorders                                    |
| Retinal infarction                     | Retinal bleeding and vascular disorders (excl retinopathy)        | Retina, choroid and vitreous haemorrhages and vascular disorders | Eye disorders                                        |
| Cerebrovascular operation              | Skull and brain therapeutic procedures                            | Nervous system, skull and spine therapeutic procedures           | Surgical and medical procedures                      |
| Hepatic artery occlusion               | Hepatic vascular disorders                                        | Hepatic and hepatobiliary disorders                              | Hepatobiliary disorders                              |
| Pacemaker syndrome                     | Cardiac complications associated with device                      | Complications associated with device                             | General disorders and administration site conditions |
| Femoral artery occlusion               | Peripheral vasoconstriction, necrosis and vascular                | Arteriosclerosis, stenosis, vascular insufficiency               | Vascular disorders                                   |

|                                              |                                                                   |                                                             |                                                      |
|----------------------------------------------|-------------------------------------------------------------------|-------------------------------------------------------------|------------------------------------------------------|
|                                              | insufficiency                                                     | and necrosis                                                |                                                      |
| Coronary arterial stent insertion            | Arterial therapeutic procedures (excl aortic)                     | Vascular therapeutic procedures                             | Surgical and medical procedures                      |
| Cerebrospinal thrombotic tamponade           | Increased intracranial pressure disorders                         | Increased intracranial pressure and hydrocephalus           | Nervous system disorders                             |
| Electrocardiogram ST-T segment abnormal      | ECG investigations                                                | Cardiac and vascular investigations (excl enzyme tests)     | Investigations                                       |
| Diastolic dysfunction                        | Myocardial disorders NEC                                          | Myocardial disorders                                        | Cardiac disorders                                    |
| Left ventricular heave                       | Cardiac signs and symptoms NEC                                    | Cardiac disorder signs and symptoms                         | Cardiac disorders                                    |
| Ventricular assist device insertion          | Cardiac device therapeutic procedures                             | Cardiac therapeutic procedures                              | Surgical and medical procedures                      |
| Electrocardiogram repolarisation abnormality | ECG investigations                                                | Cardiac and vascular investigations (excl enzyme tests)     | Investigations                                       |
| Meningorrhagia                               | Central nervous system haemorrhages and cerebrovascular accidents | Central nervous system vascular disorders                   | Nervous system disorders                             |
| Catheterisation venous                       | Venous therapeutic procedures                                     | Vascular therapeutic procedures                             | Surgical and medical procedures                      |
| Cardiac flutter                              | Rate and rhythm disorders NEC                                     | Cardiac arrhythmias                                         | Cardiac disorders                                    |
| Coronary artery insufficiency                | Coronary artery disorders NEC                                     | Coronary artery disorders                                   | Cardiac disorders                                    |
| Angiogram cerebral abnormal                  | Central nervous system imaging procedures                         | Neurological, special senses and psychiatric investigations | Investigations                                       |
| Arterial therapeutic procedure               | Arterial therapeutic procedures (excl aortic)                     | Vascular therapeutic procedures                             | Surgical and medical procedures                      |
| Venous repair                                | Venous therapeutic procedures                                     | Vascular therapeutic procedures                             | Surgical and medical procedures                      |
| Intra-aortic balloon placement               | Aortic therapeutic procedures                                     | Vascular therapeutic procedures                             | Surgical and medical procedures                      |
| Carotid artery bypass                        | Arterial therapeutic procedures (excl aortic)                     | Vascular therapeutic procedures                             | Surgical and medical procedures                      |
| Organ failure                                | General signs and symptoms NEC                                    | General system disorders NEC                                | General disorders and administration site conditions |



|                                       |                                               |                                                            |                                                      |
|---------------------------------------|-----------------------------------------------|------------------------------------------------------------|------------------------------------------------------|
| Coronary artery reocclusion           | Cardiac and vascular procedural complications | Procedural related injuries and complications<br>NEC       | Injury, poisoning and procedural complications       |
| Peripheral revascularisation          | Vascular therapeutic procedures NEC           | Vascular therapeutic procedures                            | Surgical and medical procedures                      |
| Central venous catheterisation        | Venous therapeutic procedures                 | Vascular therapeutic procedures                            | Surgical and medical procedures                      |
| Brain natriuretic peptide increased   | Metabolism tests NEC                          | Metabolic, nutritional and blood gas<br>investigations     | Investigations                                       |
| Brain natriuretic peptide abnormal    | Metabolism tests NEC                          | Metabolic, nutritional and blood gas<br>investigations     | Investigations                                       |
| Atrial natriuretic peptide abnormal   | Metabolism tests NEC                          | Metabolic, nutritional and blood gas<br>investigations     | Investigations                                       |
| Atrial natriuretic peptide increased  | Metabolism tests NEC                          | Metabolic, nutritional and blood gas<br>investigations     | Investigations                                       |
| Cardiac monitoring abnormal           | Cardiac function diagnostic procedures        | Cardiac and vascular investigations (excl enzyme<br>tests) | Investigations                                       |
| Cardiac ventriculogram right abnormal | Cardiac imaging procedures                    | Cardiac and vascular investigations (excl enzyme<br>tests) | Investigations                                       |
| Cardiac ventriculogram abnormal       | Cardiac imaging procedures                    | Cardiac and vascular investigations (excl enzyme<br>tests) | Investigations                                       |
| Cardiac telemetry abnormal            | ECG investigations                            | Cardiac and vascular investigations (excl enzyme<br>tests) | Investigations                                       |
| Cardiac imaging procedure abnormal    | Cardiac imaging procedures                    | Cardiac and vascular investigations (excl enzyme<br>tests) | Investigations                                       |
| Pacemaker generated arrhythmia        | Cardiac complications associated with device  | Complications associated with device                       | General disorders and administration site conditions |
| Cardiac ventriculogram left abnormal  | Cardiac imaging procedures                    | Cardiac and vascular investigations (excl enzyme<br>tests) | Investigations                                       |
| Foetal cerebrovascular disorder       | Central nervous system vascular disorders NEC | Central nervous system vascular disorders                  | Nervous system disorders                             |

|                                         |                                                                   |                                                         |                                 |
|-----------------------------------------|-------------------------------------------------------------------|---------------------------------------------------------|---------------------------------|
| Cerebellar artery occlusion             | Central nervous system haemorrhages and cerebrovascular accidents | Central nervous system vascular disorders               | Nervous system disorders        |
| Electrocardiogram PQ interval prolonged | ECG investigations                                                | Cardiac and vascular investigations (excl enzyme tests) | Investigations                  |
| Electrocardiogram PR prolongation       | ECG investigations                                                | Cardiac and vascular investigations (excl enzyme tests) | Investigations                  |
| Compression stockings application       | Vascular therapeutic procedures NEC                               | Vascular therapeutic procedures                         | Surgical and medical procedures |
| Sneddon's syndrome                      | Central nervous system vascular disorders NEC                     | Central nervous system vascular disorders               | Nervous system disorders        |
| Cerebral haematoma                      | Central nervous system haemorrhages and cerebrovascular accidents | Central nervous system vascular disorders               | Nervous system disorders        |
| Cardiac ventricular thrombosis          | Cardiac disorders NEC                                             | Cardiac disorder signs and symptoms                     | Cardiac disorders               |
| Agonal rhythm                           | Rate and rhythm disorders NEC                                     | Cardiac arrhythmias                                     | Cardiac disorders               |
| Myocardial calcification                | Myocardial disorders NEC                                          | Myocardial disorders                                    | Cardiac disorders               |
| Malarial myocarditis                    | Plasmodia infections                                              | Protozoal infectious disorders                          | Infections and infestations     |
| Superior mesenteric artery syndrome     | Vascular malformations and acquired anomalies                     | Vascular disorders NEC                                  | Vascular disorders              |
| Charcot-Bouchar microaneurysms          | Central nervous system aneurysms and dissections                  | Central nervous system vascular disorders               | Nervous system disorders        |
| Cardiac cirrhosis                       | Hepatic fibrosis and cirrhosis                                    | Hepatic and hepatobiliary disorders                     | Hepatobiliary disorders         |
| Cardiac stress test abnormal            | Cardiac function diagnostic procedures                            | Cardiac and vascular investigations (excl enzyme tests) | Investigations                  |
| Electrocardiogram U-wave abnormality    | ECG investigations                                                | Cardiac and vascular investigations (excl enzyme tests) | Investigations                  |
| Haemorrhagic transformation stroke      | Central nervous system haemorrhages and cerebrovascular accidents | Central nervous system vascular disorders               | Nervous system disorders        |
| Haemorrhage coronary artery             | Coronary artery disorders NEC                                     | Coronary artery disorders                               | Cardiac disorders               |

|                                            |                                                                |                                                                  |                                                |
|--------------------------------------------|----------------------------------------------------------------|------------------------------------------------------------------|------------------------------------------------|
| Cytomegalovirus myocarditis                | Cytomegaloviral infections                                     | Viral infectious disorders                                       | Infections and infestations                    |
| Viral vasculitis                           | Viral infections NEC                                           | Viral infectious disorders                                       | Infections and infestations                    |
| Renal vein occlusion                       | Renal vascular and ischaemic conditions                        | Renal disorders (excl nephropathies)                             | Renal and urinary disorders                    |
| Congestive cardiomyopathy                  | Cardiomyopathies                                               | Myocardial disorders                                             | Cardiac disorders                              |
| Cerebrovascular arteriovenous malformation | Vascular anomalies congenital NEC                              | Cardiac and vascular disorders congenital                        | Congenital, familial and genetic disorders     |
| Intraoperative cerebral artery occlusion   | Cardiac and vascular procedural complications                  | Procedural related injuries and complications<br>NEC             | Injury, poisoning and procedural complications |
| Heart and lung transplant                  | Cardiac therapeutic procedures NEC                             | Cardiac therapeutic procedures                                   | Surgical and medical procedures                |
| Arterial bypass operation                  | Arterial therapeutic procedures (excl aortic)                  | Vascular therapeutic procedures                                  | Surgical and medical procedures                |
| Bradycardia neonatal                       | Rate and rhythm disorders NEC                                  | Cardiac arrhythmias                                              | Cardiac disorders                              |
| Ventricular hyperkinesia                   | Myocardial disorders NEC                                       | Myocardial disorders                                             | Cardiac disorders                              |
| Coronary artery restenosis                 | Cardiac and vascular procedural complications                  | Procedural related injuries and complications<br>NEC             | Injury, poisoning and procedural complications |
| Cogan's syndrome                           | Iris and uveal tract infections, irritations and inflammations | Ocular infections, irritations and inflammations                 | Eye disorders                                  |
| Palpable purpura                           | Skin vasculitides                                              | Skin vascular abnormalities                                      | Skin and subcutaneous tissue disorders         |
| Blood brain barrier defect                 | Central nervous system vascular disorders NEC                  | Central nervous system vascular disorders                        | Nervous system disorders                       |
| Balint's syndrome                          | Cortical dysfunction NEC                                       | Neurological disorders NEC                                       | Nervous system disorders                       |
| Bifascicular block                         | Cardiac conduction disorders                                   | Cardiac arrhythmias                                              | Cardiac disorders                              |
| Choroidal infarction                       | Choroid and vitreous haemorrhages and vascular disorders       | Retina, choroid and vitreous haemorrhages and vascular disorders | Eye disorders                                  |
| Renal artery angioplasty                   | Arterial therapeutic procedures (excl aortic)                  | Vascular therapeutic procedures                                  | Surgical and medical procedures                |

|                                            |                                                                   |                                                              |                                            |
|--------------------------------------------|-------------------------------------------------------------------|--------------------------------------------------------------|--------------------------------------------|
| Angiogram peripheral abnormal              | Vascular imaging procedures NEC                                   | Cardiac and vascular investigations (excl enzyme tests)      | Investigations                             |
| Peripheral artery angioplasty              | Arterial therapeutic procedures (excl aortic)                     | Vascular therapeutic procedures                              | Surgical and medical procedures            |
| ECG P wave inverted                        | ECG investigations                                                | Cardiac and vascular investigations (excl enzyme tests)      | Investigations                             |
| Cardiac septal hypertrophy                 | Myocardial disorders NEC                                          | Myocardial disorders                                         | Cardiac disorders                          |
| Aortic bypass                              | Aortic therapeutic procedures                                     | Vascular therapeutic procedures                              | Surgical and medical procedures            |
| Vertebral artery thrombosis                | Central nervous system haemorrhages and cerebrovascular accidents | Central nervous system vascular disorders                    | Nervous system disorders                   |
| Aortogram abnormal                         | Vascular imaging procedures NEC                                   | Cardiac and vascular investigations (excl enzyme tests)      | Investigations                             |
| Computerised tomogram thorax abnormal      | Respiratory tract and thoracic imaging procedures                 | Respiratory and pulmonary investigations (excl blood gases)  | Investigations                             |
| Long QT syndrome congenital                | Cardiac disorders congenital NEC                                  | Cardiac and vascular disorders congenital                    | Congenital, familial and genetic disorders |
| Arrhythmogenic right ventricular dysplasia | Cardiac disorders congenital NEC                                  | Cardiac and vascular disorders congenital                    | Congenital, familial and genetic disorders |
| Neurogenic shock                           | Circulatory collapse and shock                                    | Decreased and nonspecific blood pressure disorders and shock | Vascular disorders                         |
| Lupus vasculitis                           | Vasculitides NEC                                                  | Vascular inflammations                                       | Vascular disorders                         |
| Postinfarction angina                      | Ischaemic coronary artery disorders                               | Coronary artery disorders                                    | Cardiac disorders                          |
| Subendocardial ischaemia                   | Ischaemic coronary artery disorders                               | Coronary artery disorders                                    | Cardiac disorders                          |
| Pulseless electrical activity              | Ventricular arrhythmias and cardiac arrest                        | Cardiac arrhythmias                                          | Cardiac disorders                          |
| Heart alternation                          | Rate and rhythm disorders NEC                                     | Cardiac arrhythmias                                          | Cardiac disorders                          |
| Reperfusion arrhythmia                     | Rate and rhythm disorders NEC                                     | Cardiac arrhythmias                                          | Cardiac disorders                          |

|                                                      |                                                   |                                                              |                                                      |
|------------------------------------------------------|---------------------------------------------------|--------------------------------------------------------------|------------------------------------------------------|
| Ventricular parasystole                              | Ventricular arrhythmias and cardiac arrest        | Cardiac arrhythmias                                          | Cardiac disorders                                    |
| Hypertensive cardiomyopathy                          | Cardiomyopathies                                  | Myocardial disorders                                         | Cardiac disorders                                    |
| Troponin increased                                   | Skeletal and cardiac muscle analyses              | Enzyme investigations NEC                                    | Investigations                                       |
| Troponin I increased                                 | Skeletal and cardiac muscle analyses              | Enzyme investigations NEC                                    | Investigations                                       |
| Troponin T increased                                 | Skeletal and cardiac muscle analyses              | Enzyme investigations NEC                                    | Investigations                                       |
| ECG signs of myocardial ischaemia                    | ECG investigations                                | Cardiac and vascular investigations (excl enzyme tests)      | Investigations                                       |
| Surgical vascular shunt                              | Vascular therapeutic procedures NEC               | Vascular therapeutic procedures                              | Surgical and medical procedures                      |
| Myocardial abscess                                   | Cardiac infections                                | Infections - pathogen unspecified                            | Infections and infestations                          |
| Cardiac function test abnormal                       | Cardiac function diagnostic procedures            | Cardiac and vascular investigations (excl enzyme tests)      | Investigations                                       |
| Hypoperfusion                                        | Circulatory collapse and shock                    | Decreased and nonspecific blood pressure disorders and shock | Vascular disorders                                   |
| Arteriovenous fistula occlusion                      | Cardiac and vascular procedural complications     | Procedural related injuries and complications NEC            | Injury, poisoning and procedural complications       |
| Spinal cord infarction                               | Spinal cord and nerve root disorders NEC          | Spinal cord and nerve root disorders                         | Nervous system disorders                             |
| Right ventricular dysfunction                        | Myocardial disorders NEC                          | Myocardial disorders                                         | Cardiac disorders                                    |
| Nuclear magnetic resonance imaging thoracic abnormal | Respiratory tract and thoracic imaging procedures | Respiratory and pulmonary investigations (excl blood gases)  | Investigations                                       |
| Embolia cutis medicamentosa                          | Injection site reactions                          | Administration site reactions                                | General disorders and administration site conditions |
| Myoglobinaemia                                       | Muscle related signs and symptoms NEC             | Muscle disorders                                             | Musculoskeletal and connective tissue disorders      |
| Vasodilation procedure                               | Vascular therapeutic procedures NEC               | Vascular therapeutic procedures                              | Surgical and medical procedures                      |
| Cerebrovascular insufficiency                        | Central nervous system vascular disorders NEC     | Central nervous system vascular disorders                    | Nervous system disorders                             |

|                               |                                                                   |                                                                 |                                                |
|-------------------------------|-------------------------------------------------------------------|-----------------------------------------------------------------|------------------------------------------------|
| Thalamus haemorrhage          | Central nervous system haemorrhages and cerebrovascular accidents | Central nervous system vascular disorders                       | Nervous system disorders                       |
| Putamen haemorrhage           | Central nervous system haemorrhages and cerebrovascular accidents | Central nervous system vascular disorders                       | Nervous system disorders                       |
| Inferior vena caval occlusion | Site specific necrosis and vascular insufficiency<br>NEC          | Arteriosclerosis, stenosis, vascular insufficiency and necrosis | Vascular disorders                             |
| Superior vena cava occlusion  | Site specific necrosis and vascular insufficiency<br>NEC          | Arteriosclerosis, stenosis, vascular insufficiency and necrosis | Vascular disorders                             |
| Portal vein occlusion         | Hepatic vascular disorders                                        | Hepatic and hepatobiliary disorders                             | Hepatobiliary disorders                        |
| Venous occlusion              | Non-site specific necrosis and vascular insufficiency<br>NEC      | Arteriosclerosis, stenosis, vascular insufficiency and necrosis | Vascular disorders                             |
| Hepatic vein occlusion        | Hepatic vascular disorders                                        | Hepatic and hepatobiliary disorders                             | Hepatobiliary disorders                        |
| Iliac vein occlusion          | Peripheral vasoconstriction, necrosis and vascular insufficiency  | Arteriosclerosis, stenosis, vascular insufficiency and necrosis | Vascular disorders                             |
| Coronary bypass thrombosis    | Cardiac and vascular procedural complications                     | Procedural related injuries and complications<br>NEC            | Injury, poisoning and procedural complications |
| Myocarditis mycotic           | Fungal infections NEC                                             | Fungal infectious disorders                                     | Infections and infestations                    |
| Brugada syndrome              | Cardiac conduction disorders                                      | Cardiac arrhythmias                                             | Cardiac disorders                              |
| Shunt thrombosis              | Non-site specific procedural complications                        | Procedural related injuries and complications<br>NEC            | Injury, poisoning and procedural complications |
| Ventricular dysfunction       | Myocardial disorders NEC                                          | Myocardial disorders                                            | Cardiac disorders                              |
| Cerebral vasoconstriction     | Central nervous system vascular disorders NEC                     | Central nervous system vascular disorders                       | Nervous system disorders                       |
| Ventricular dyskinesia        | Myocardial disorders NEC                                          | Myocardial disorders                                            | Cardiac disorders                              |
| Papillary muscle haemorrhage  | Myocardial disorders NEC                                          | Myocardial disorders                                            | Cardiac disorders                              |
| Intracranial haematoma        | Central nervous system haemorrhages and                           | Central nervous system vascular disorders                       | Nervous system disorders                       |

|                                                   |                                                                   |                                                         |                                 |
|---------------------------------------------------|-------------------------------------------------------------------|---------------------------------------------------------|---------------------------------|
|                                                   | cerebrovascular accidents                                         |                                                         |                                 |
| Stroke in evolution                               | Central nervous system haemorrhages and cerebrovascular accidents | Central nervous system vascular disorders               | Nervous system disorders        |
| Fahr's disease                                    | Central nervous system vascular disorders NEC                     | Central nervous system vascular disorders               | Nervous system disorders        |
| Pneumatic compression therapy                     | Vascular therapeutic procedures NEC                               | Vascular therapeutic procedures                         | Surgical and medical procedures |
| Cardiac resynchronisation therapy                 | Cardiac device therapeutic procedures                             | Cardiac therapeutic procedures                          | Surgical and medical procedures |
| Jugular vein distension                           | Site specific vascular disorders NEC                              | Vascular disorders NEC                                  | Vascular disorders              |
| Left ventricular end-diastolic pressure decreased | Cardiac function diagnostic procedures                            | Cardiac and vascular investigations (excl enzyme tests) | Investigations                  |
| Antineutrophil cytoplasmic antibody positive      | Autoimmunity analyses                                             | Immunology and allergy investigations                   | Investigations                  |
| Antineutrophil cytoplasmic antibody increased     | Autoimmunity analyses                                             | Immunology and allergy investigations                   | Investigations                  |
| Right ventricular systolic pressure decreased     | Cardiac function diagnostic procedures                            | Cardiac and vascular investigations (excl enzyme tests) | Investigations                  |
| Computerised tomogram coronary artery abnormal    | Cardiac imaging procedures                                        | Cardiac and vascular investigations (excl enzyme tests) | Investigations                  |
| Embolic cerebral infarction                       | Central nervous system haemorrhages and cerebrovascular accidents | Central nervous system vascular disorders               | Nervous system disorders        |
| Ischaemic cerebral infarction                     | Central nervous system haemorrhages and cerebrovascular accidents | Central nervous system vascular disorders               | Nervous system disorders        |
| Ventricular failure                               | Heart failures NEC                                                | Heart failures                                          | Cardiac disorders               |
| Angiogram abnormal                                | Vascular imaging procedures NEC                                   | Cardiac and vascular investigations (excl enzyme tests) | Investigations                  |
| Cardiac operation                                 | Cardiac therapeutic procedures NEC                                | Cardiac therapeutic procedures                          | Surgical and medical procedures |
| Cerebellar haematoma                              | Central nervous system haemorrhages and                           | Central nervous system vascular disorders               | Nervous system disorders        |

|                                      |                                                                   |                                                                 |                                                      |
|--------------------------------------|-------------------------------------------------------------------|-----------------------------------------------------------------|------------------------------------------------------|
|                                      | cerebrovascular accidents                                         |                                                                 |                                                      |
| Electrocardiogram change             | ECG investigations                                                | Cardiac and vascular investigations (excl enzyme tests)         | Investigations                                       |
| Foetal heart rate disorder           | Rate and rhythm disorders NEC                                     | Cardiac arrhythmias                                             | Cardiac disorders                                    |
| Embolism                             | Non-site specific embolism and thrombosis                         | Embolism and thrombosis                                         | Vascular disorders                                   |
| Infarction                           | Non-site specific necrosis and vascular insufficiency NEC         | Arteriosclerosis, stenosis, vascular insufficiency and necrosis | Vascular disorders                                   |
| Intracranial venous sinus thrombosis | Cerebrovascular venous and sinus thrombosis                       | Central nervous system vascular disorders                       | Nervous system disorders                             |
| Ischaemic stroke                     | Central nervous system haemorrhages and cerebrovascular accidents | Central nervous system vascular disorders                       | Nervous system disorders                             |
| Oedema neonatal                      | Oedema NEC                                                        | General system disorders NEC                                    | General disorders and administration site conditions |
| Papillary muscle disorder            | Myocardial disorders NEC                                          | Myocardial disorders                                            | Cardiac disorders                                    |
| Peripheral embolism                  | Peripheral embolism and thrombosis                                | Embolism and thrombosis                                         | Vascular disorders                                   |
| Spinal vascular disorder             | Central nervous system vascular disorders NEC                     | Central nervous system vascular disorders                       | Nervous system disorders                             |
| Venous thrombosis limb               | Peripheral embolism and thrombosis                                | Embolism and thrombosis                                         | Vascular disorders                                   |
| Antibody test abnormal               | Immunology analyses NEC                                           | Immunology and allergy investigations                           | Investigations                                       |
| Antibody test positive               | Immunology analyses NEC                                           | Immunology and allergy investigations                           | Investigations                                       |
| Scan myocardial perfusion abnormal   | Cardiac imaging procedures                                        | Cardiac and vascular investigations (excl enzyme tests)         | Investigations                                       |
| Cardiac fibrillation                 | Rate and rhythm disorders NEC                                     | Cardiac arrhythmias                                             | Cardiac disorders                                    |
| Echocardiogram abnormal              | Cardiac function diagnostic procedures                            | Cardiac and vascular investigations (excl enzyme tests)         | Investigations                                       |
| Ultrasonic angiogram abnormal        | Vascular imaging procedures NEC                                   | Cardiac and vascular investigations (excl enzyme tests)         | Investigations                                       |



|                                           |                                                                   |                                                                  |                                                      |
|-------------------------------------------|-------------------------------------------------------------------|------------------------------------------------------------------|------------------------------------------------------|
|                                           |                                                                   | tests)                                                           |                                                      |
| Aortic surgery                            | Aortic therapeutic procedures                                     | Vascular therapeutic procedures                                  | Surgical and medical procedures                      |
| Arterial graft                            | Arterial therapeutic procedures (excl aortic)                     | Vascular therapeutic procedures                                  | Surgical and medical procedures                      |
| Arterial stent insertion                  | Arterial therapeutic procedures (excl aortic)                     | Vascular therapeutic procedures                                  | Surgical and medical procedures                      |
| Arteriogram abnormal                      | Vascular imaging procedures NEC                                   | Cardiac and vascular investigations (excl enzyme tests)          | Investigations                                       |
| Carotid artery disease                    | Central nervous system vascular disorders NEC                     | Central nervous system vascular disorders                        | Nervous system disorders                             |
| Cerebrovascular stenosis                  | Central nervous system vascular disorders NEC                     | Central nervous system vascular disorders                        | Nervous system disorders                             |
| Cardiac electrophysiologic study abnormal | Cardiac function diagnostic procedures                            | Cardiac and vascular investigations (excl enzyme tests)          | Investigations                                       |
| Intracerebral haematoma evacuation        | Skull and brain therapeutic procedures                            | Nervous system, skull and spine therapeutic procedures           | Surgical and medical procedures                      |
| Retinal vascular thrombosis               | Retinal bleeding and vascular disorders (excl retinopathy)        | Retina, choroid and vitreous haemorrhages and vascular disorders | Eye disorders                                        |
| Venoocclusive disease                     | Non-site specific vascular disorders NEC                          | Vascular disorders NEC                                           | Vascular disorders                                   |
| Venous operation                          | Venous therapeutic procedures                                     | Vascular therapeutic procedures                                  | Surgical and medical procedures                      |
| Congenital cerebrovascular anomaly        | Vascular anomalies congenital NEC                                 | Cardiac and vascular disorders congenital                        | Congenital, familial and genetic disorders           |
| Truncus coeliacus thrombosis              | Gastrointestinal vascular occlusion and infarction                | Gastrointestinal vascular conditions                             | Gastrointestinal disorders                           |
| Heparin-induced thrombocytopenia          | Thrombocytopenias                                                 | Platelet disorders                                               | Blood and lymphatic system disorders                 |
| Thrombosis in device                      | Device malfunction events NEC                                     | Device issues                                                    | General disorders and administration site conditions |
| Brain stem thrombosis                     | Central nervous system haemorrhages and cerebrovascular accidents | Central nervous system vascular disorders                        | Nervous system disorders                             |
| Peripheral arterial occlusive disease     | Peripheral vasoconstriction, necrosis and vascular                | Arteriosclerosis, stenosis, vascular insufficiency               | Vascular disorders                                   |

|                                        |                                                                   |                                                                 |                                    |
|----------------------------------------|-------------------------------------------------------------------|-----------------------------------------------------------------|------------------------------------|
|                                        | insufficiency                                                     | and necrosis                                                    |                                    |
| Arterial occlusive disease             | Non-site specific necrosis and vascular insufficiency NEC         | Arteriosclerosis, stenosis, vascular insufficiency and necrosis | Vascular disorders                 |
| Atherectomy                            | Arterial therapeutic procedures (excl aortic)                     | Vascular therapeutic procedures                                 | Surgical and medical procedures    |
| Acute left ventricular failure         | Left ventricular failures                                         | Heart failures                                                  | Cardiac disorders                  |
| Acute right ventricular failure        | Right ventricular failures                                        | Heart failures                                                  | Cardiac disorders                  |
| Chronic left ventricular failure       | Left ventricular failures                                         | Heart failures                                                  | Cardiac disorders                  |
| Chronic right ventricular failure      | Right ventricular failures                                        | Heart failures                                                  | Cardiac disorders                  |
| Basilar artery thrombosis              | Central nervous system haemorrhages and cerebrovascular accidents | Central nervous system vascular disorders                       | Nervous system disorders           |
| Anaphylactoid shock                    | Anaphylactic responses                                            | Allergic conditions                                             | Immune system disorders            |
| Propofol infusion syndrome             | Metabolic acidoses (excl diabetic acidoses)                       | Acid-base disorders                                             | Metabolism and nutrition disorders |
| Microscopic polyangiitis               | Vasculitides NEC                                                  | Vascular inflammations                                          | Vascular disorders                 |
| Vascular stent insertion               | Vascular therapeutic procedures NEC                               | Vascular therapeutic procedures                                 | Surgical and medical procedures    |
| Venous stent insertion                 | Venous therapeutic procedures                                     | Vascular therapeutic procedures                                 | Surgical and medical procedures    |
| Cardiac siderosis                      | Cardiomyopathies                                                  | Myocardial disorders                                            | Cardiac disorders                  |
| Hypothenar hammer syndrome             | Peripheral embolism and thrombosis                                | Embolism and thrombosis                                         | Vascular disorders                 |
| Renal embolism                         | Renal vascular and ischaemic conditions                           | Renal disorders (excl nephropathies)                            | Renal and urinary disorders        |
| Cerebral artery stenosis               | Central nervous system vascular disorders NEC                     | Central nervous system vascular disorders                       | Nervous system disorders           |
| Vascular encephalopathy                | Central nervous system vascular disorders NEC                     | Central nervous system vascular disorders                       | Nervous system disorders           |
| Pulmonary artery therapeutic procedure | Arterial therapeutic procedures (excl aortic)                     | Vascular therapeutic procedures                                 | Surgical and medical procedures    |

|                                           |                                                                   |                                                                 |                                                      |
|-------------------------------------------|-------------------------------------------------------------------|-----------------------------------------------------------------|------------------------------------------------------|
| Electrocardiogram QT interval abnormal    | ECG investigations                                                | Cardiac and vascular investigations (excl enzyme tests)         | Investigations                                       |
| Implant site thrombosis                   | Implant and catheter site reactions                               | Administration site reactions                                   | General disorders and administration site conditions |
| Post procedural pulmonary embolism        | Respiratory tract and thoracic cavity procedural complications    | Procedural related injuries and complications NEC               | Injury, poisoning and procedural complications       |
| Central pain syndrome                     | Sensory abnormalities NEC                                         | Neurological disorders NEC                                      | Nervous system disorders                             |
| Atrial conduction time prolongation       | Cardiac conduction disorders                                      | Cardiac arrhythmias                                             | Cardiac disorders                                    |
| Right ventricle outflow tract obstruction | Cardiovascular disorders congenital NEC                           | Cardiac and vascular disorders congenital                       | Congenital, familial and genetic disorders           |
| Autoimmune myocarditis                    | Noninfectious myocarditis                                         | Myocardial disorders                                            | Cardiac disorders                                    |
| Myocarditis post infection                | Noninfectious myocarditis                                         | Myocardial disorders                                            | Cardiac disorders                                    |
| Iliac artery occlusion                    | Peripheral vasoconstriction, necrosis and vascular insufficiency  | Arteriosclerosis, stenosis, vascular insufficiency and necrosis | Vascular disorders                                   |
| Venous thrombosis neonatal                | Non-site specific embolism and thrombosis                         | Embolism and thrombosis                                         | Vascular disorders                                   |
| Placental infarction                      | Placental abnormalities (excl neoplasms)                          | Placental, amniotic and cavity disorders (excl haemorrhages)    | Pregnancy, puerperium and perinatal conditions       |
| Device occlusion                          | Device malfunction events NEC                                     | Device issues                                                   | General disorders and administration site conditions |
| Carotid artery insufficiency              | Central nervous system vascular disorders NEC                     | Central nervous system vascular disorders                       | Nervous system disorders                             |
| Thromboembolectomy                        | Vascular therapeutic procedures NEC                               | Vascular therapeutic procedures                                 | Surgical and medical procedures                      |
| Thalamic infarction                       | Central nervous system haemorrhages and cerebrovascular accidents | Central nervous system vascular disorders                       | Nervous system disorders                             |
| Subclavian coronary steal syndrome        | Ischaemic coronary artery disorders                               | Coronary artery disorders                                       | Cardiac disorders                                    |
| Myocarditis bacterial                     | Bacterial infections NEC                                          | Bacterial infectious disorders                                  | Infections and infestations                          |
| Myocarditis helminthic                    | Helminthic infections NEC                                         | Helminthic disorders                                            | Infections and infestations                          |

|                                    |                                                    |                                                             |                                                      |
|------------------------------------|----------------------------------------------------|-------------------------------------------------------------|------------------------------------------------------|
| Pseudovasculitis                   | Vasculitides NEC                                   | Vascular inflammations                                      | Vascular disorders                                   |
| Ventricular tachyarrhythmia        | Ventricular arrhythmias and cardiac arrest         | Cardiac arrhythmias                                         | Cardiac disorders                                    |
| Supraventricular tachyarrhythmia   | Supraventricular arrhythmias                       | Cardiac arrhythmias                                         | Cardiac disorders                                    |
| Cerebral hypoperfusion             | Central nervous system vascular disorders NEC      | Central nervous system vascular disorders                   | Nervous system disorders                             |
| Infusion site thrombosis           | Infusion site reactions                            | Administration site reactions                               | General disorders and administration site conditions |
| NIH stroke scale score increased   | Neurologic diagnostic procedures                   | Neurological, special senses and psychiatric investigations | Investigations                                       |
| NIH stroke scale score decreased   | Neurologic diagnostic procedures                   | Neurological, special senses and psychiatric investigations | Investigations                                       |
| NIH stroke scale abnormal          | Neurologic diagnostic procedures                   | Neurological, special senses and psychiatric investigations | Investigations                                       |
| Cerebral arteriosclerosis          | Central nervous system vascular disorders NEC      | Central nervous system vascular disorders                   | Nervous system disorders                             |
| Mesenteric arteriosclerosis        | Gastrointestinal vascular occlusion and infarction | Gastrointestinal vascular conditions                        | Gastrointestinal disorders                           |
| Percutaneous coronary intervention | Arterial therapeutic procedures (excl aortic)      | Vascular therapeutic procedures                             | Surgical and medical procedures                      |
| Embolic pneumonia                  | Lower respiratory tract and lung infections        | Infections - pathogen unspecified                           | Infections and infestations                          |
| Cardiovascular insufficiency       | Cardiac disorders NEC                              | Cardiac disorder signs and symptoms                         | Cardiac disorders                                    |
| Paradoxical embolism               | Non-site specific embolism and thrombosis          | Embolism and thrombosis                                     | Vascular disorders                                   |
| Intracardiac mass                  | Cardiac disorders NEC                              | Cardiac disorder signs and symptoms                         | Cardiac disorders                                    |
| Carotid artery stent insertion     | Arterial therapeutic procedures (excl aortic)      | Vascular therapeutic procedures                             | Surgical and medical procedures                      |
| Stress cardiomyopathy              | Cardiomyopathies                                   | Myocardial disorders                                        | Cardiac disorders                                    |
| Lupus myocarditis                  | Noninfectious myocarditis                          | Myocardial disorders                                        | Cardiac disorders                                    |
| Post procedural stroke             | Neurological and psychiatric procedural            | Procedural related injuries and complications               | Injury, poisoning and procedural complications       |

|                                         |                                                                      |                                                                     |                                                |
|-----------------------------------------|----------------------------------------------------------------------|---------------------------------------------------------------------|------------------------------------------------|
|                                         | complications                                                        | NEC                                                                 |                                                |
| Post procedural myocardial infarction   | Cardiac and vascular procedural complications                        | Procedural related injuries and complications<br>NEC                | Injury, poisoning and procedural complications |
| Visual midline shift syndrome           | Sensory abnormalities NEC                                            | Neurological disorders NEC                                          | Nervous system disorders                       |
| Myocarditis infectious                  | Cardiac infections                                                   | Infections - pathogen unspecified                                   | Infections and infestations                    |
| Deep vein thrombosis postoperative      | Cardiac and vascular procedural complications                        | Procedural related injuries and complications<br>NEC                | Injury, poisoning and procedural complications |
| Ocular vasculitis                       | Ocular infections, inflammations and associated<br>manifestations    | Ocular infections, irritations and inflammations                    | Eye disorders                                  |
| Venous thrombosis in pregnancy          | Non-site specific embolism and thrombosis                            | Embolism and thrombosis                                             | Vascular disorders                             |
| Basal ganglia haemorrhage               | Central nervous system haemorrhages and<br>cerebrovascular accidents | Central nervous system vascular disorders                           | Nervous system disorders                       |
| Anaphylactic transfusion reaction       | Transfusion related complications                                    | Procedural related injuries and complications<br>NEC                | Injury, poisoning and procedural complications |
| Carotid arteriosclerosis                | Central nervous system vascular disorders NEC                        | Central nervous system vascular disorders                           | Nervous system disorders                       |
| Cerebellar embolism                     | Central nervous system haemorrhages and<br>cerebrovascular accidents | Central nervous system vascular disorders                           | Nervous system disorders                       |
| Rebound tachycardia                     | Rate and rhythm disorders NEC                                        | Cardiac arrhythmias                                                 | Cardiac disorders                              |
| Thrombosis corpora cavernosa            | Penile disorders NEC (excl erection and ejaculation)                 | Penile and scrotal disorders (excl infections and<br>inflammations) | Reproductive system and breast disorders       |
| Cerebral microhaemorrhage               | Central nervous system vascular disorders NEC                        | Central nervous system vascular disorders                           | Nervous system disorders                       |
| Right atrial dilatation                 | Myocardial disorders NEC                                             | Myocardial disorders                                                | Cardiac disorders                              |
| Right atrial pressure increased         | Cardiac function diagnostic procedures                               | Cardiac and vascular investigations (excl enzyme<br>tests)          | Investigations                                 |
| Vascular resistance pulmonary increased | Vascular tests NEC (incl blood pressure)                             | Cardiac and vascular investigations (excl enzyme<br>tests)          | Investigations                                 |

|                                         |                                                                   |                                                                  |                                                                     |
|-----------------------------------------|-------------------------------------------------------------------|------------------------------------------------------------------|---------------------------------------------------------------------|
|                                         |                                                                   | tests)                                                           |                                                                     |
| Left atrial dilatation                  | Myocardial disorders NEC                                          | Myocardial disorders                                             | Cardiac disorders                                                   |
| Thrombotic cerebral infarction          | Central nervous system haemorrhages and cerebrovascular accidents | Central nervous system vascular disorders                        | Nervous system disorders                                            |
| Millard-Gubler syndrome                 | Nervous system disorders NEC                                      | Neurological disorders NEC                                       | Nervous system disorders                                            |
| Cerebral microangiopathy                | Central nervous system vascular disorders NEC                     | Central nervous system vascular disorders                        | Nervous system disorders                                            |
| Segmented hyalinising vasculitis        | Skin vasculitides                                                 | Skin vascular abnormalities                                      | Skin and subcutaneous tissue disorders                              |
| Accessory cardiac pathway               | Cardiac conduction disorders                                      | Cardiac arrhythmias                                              | Cardiac disorders                                                   |
| Reduction ventriculoplasty              | Cardiac therapeutic procedures NEC                                | Cardiac therapeutic procedures                                   | Surgical and medical procedures                                     |
| Electrocardiogram RR interval prolonged | ECG investigations                                                | Cardiac and vascular investigations (excl enzyme tests)          | Investigations                                                      |
| Vascular graft                          | Vascular therapeutic procedures NEC                               | Vascular therapeutic procedures                                  | Surgical and medical procedures                                     |
| Capsular warning syndrome               | Transient cerebrovascular events                                  | Central nervous system vascular disorders                        | Nervous system disorders                                            |
| External counterpulsation               | Arterial therapeutic procedures (excl aortic)                     | Vascular therapeutic procedures                                  | Surgical and medical procedures                                     |
| Brain injury                            | Structural brain disorders NEC                                    | Structural brain disorders                                       | Nervous system disorders                                            |
| Injection site vasculitis               | Injection site reactions                                          | Administration site reactions                                    | General disorders and administration site conditions                |
| Penile artery occlusion                 | Penile disorders NEC (excl erection and ejaculation)              | Penile and scrotal disorders (excl infections and inflammations) | Reproductive system and breast disorders                            |
| Cerebral amyloid angiopathy             | Central nervous system vascular disorders NEC                     | Central nervous system vascular disorders                        | Nervous system disorders                                            |
| Tumour thrombosis                       | Oncologic complications and emergencies                           | Neoplasm related morbidities                                     | Neoplasms benign, malignant and unspecified (incl cysts and polyps) |
| Splenic vein occlusion                  | Spleen disorders                                                  | Spleen, lymphatic and reticuloendothelial system disorders       | Blood and lymphatic system disorders                                |

|                                            |                                                                   |                                                            |                                                 |
|--------------------------------------------|-------------------------------------------------------------------|------------------------------------------------------------|-------------------------------------------------|
| Atrioventricular conduction time shortened | Cardiac conduction disorders                                      | Cardiac arrhythmias                                        | Cardiac disorders                               |
| Cardiorenal syndrome                       | Heart failures NEC                                                | Heart failures                                             | Cardiac disorders                               |
| Pancreatic infarction                      | Pancreatic disorders NEC                                          | Exocrine pancreas conditions                               | Gastrointestinal disorders                      |
| Hyperdynamic left ventricle                | Cardiac signs and symptoms NEC                                    | Cardiac disorder signs and symptoms                        | Cardiac disorders                               |
| Femoral artery embolism                    | Peripheral embolism and thrombosis                                | Embolism and thrombosis                                    | Vascular disorders                              |
| Capillaritis                               | Skin vasculitides                                                 | Skin vascular abnormalities                                | Skin and subcutaneous tissue disorders          |
| SI QIII TIII pattern                       | ECG investigations                                                | Cardiac and vascular investigations (excl enzyme tests)    | Investigations                                  |
| Coronary no-reflow phenomenon              | Ischaemic coronary artery disorders                               | Coronary artery disorders                                  | Cardiac disorders                               |
| Venous recanalisation                      | Non-site specific embolism and thrombosis                         | Embolism and thrombosis                                    | Vascular disorders                              |
| Cerebellar ischaemia                       | Central nervous system haemorrhages and cerebrovascular accidents | Central nervous system vascular disorders                  | Nervous system disorders                        |
| Chronotropic incompetence                  | Rate and rhythm disorders NEC                                     | Cardiac arrhythmias                                        | Cardiac disorders                               |
| Prosthetic vessel implantation             | Vascular therapeutic procedures NEC                               | Vascular therapeutic procedures                            | Surgical and medical procedures                 |
| Brain stem stroke                          | Central nervous system haemorrhages and cerebrovascular accidents | Central nervous system vascular disorders                  | Nervous system disorders                        |
| Splenic embolism                           | Spleen disorders                                                  | Spleen, lymphatic and reticuloendothelial system disorders | Blood and lymphatic system disorders            |
| Pulmonary vein occlusion                   | Vascular pulmonary disorders NEC                                  | Pulmonary vascular disorders                               | Respiratory, thoracic and mediastinal disorders |
| Viral cardiomyopathy                       | Viral infections NEC                                              | Viral infectious disorders                                 | Infections and infestations                     |
| Basal ganglia infarction                   | Central nervous system haemorrhages and cerebrovascular accidents | Central nervous system vascular disorders                  | Nervous system disorders                        |
| Hepatic vein dilatation                    | Hepatic vascular disorders                                        | Hepatic and hepatobiliary disorders                        | Hepatobiliary disorders                         |

|                                    |                                                                     |                                                                    |                                                                        |
|------------------------------------|---------------------------------------------------------------------|--------------------------------------------------------------------|------------------------------------------------------------------------|
| Myocardial depression              | Myocardial disorders NEC                                            | Myocardial disorders                                               | Cardiac disorders                                                      |
| Kounis syndrome                    | Ischaemic coronary artery disorders                                 | Coronary artery disorders                                          | Cardiac disorders                                                      |
| Peripheral arterial reocclusion    | Cardiac and vascular procedural complications                       | Procedural related injuries and complications<br>NEC               | Injury, poisoning and procedural complications                         |
| Henoch-Schonlein purpura nephritis | Glomerulonephritis and nephrotic syndrome                           | Nephropathies                                                      | Renal and urinary disorders                                            |
| Atrioventricular dissociation      | Cardiac conduction disorders                                        | Cardiac arrhythmias                                                | Cardiac disorders                                                      |
| HIV cardiomyopathy                 | Retroviral infections                                               | Viral infectious disorders                                         | Infections and infestations                                            |
| Brachiocephalic artery occlusion   | Site specific necrosis and vascular insufficiency<br>NEC            | Arteriosclerosis, stenosis, vascular insufficiency<br>and necrosis | Vascular disorders                                                     |
| Subclavian artery occlusion        | Site specific necrosis and vascular insufficiency<br>NEC            | Arteriosclerosis, stenosis, vascular insufficiency<br>and necrosis | Vascular disorders                                                     |
| Coeliac artery occlusion           | Site specific necrosis and vascular insufficiency<br>NEC            | Arteriosclerosis, stenosis, vascular insufficiency<br>and necrosis | Vascular disorders                                                     |
| Langerhans' cell histiocytosis     | Histiocytoses                                                       | Haematopoietic neoplasms (excl leukaemias and<br>lymphomas)        | Neoplasms benign, malignant and unspecified (incl<br>cysts and polyps) |
| May-Thurner syndrome               | Peripheral vasoconstriction, necrosis and vascular<br>insufficiency | Arteriosclerosis, stenosis, vascular insufficiency<br>and necrosis | Vascular disorders                                                     |
| Collateral circulation             | Non-site specific vascular disorders NEC                            | Vascular disorders NEC                                             | Vascular disorders                                                     |
| Vascular graft thrombosis          | Transplantation complications                                       | Procedural related injuries and complications<br>NEC               | Injury, poisoning and procedural complications                         |
| Carotid artery stent removal       | Arterial therapeutic procedures (excl aortic)                       | Vascular therapeutic procedures                                    | Surgical and medical procedures                                        |
| Hypoxic-ischaemic encephalopathy   | Encephalopathies NEC                                                | Encephalopathies                                                   | Nervous system disorders                                               |
| Type 2 lepra reaction              | Leprous infections                                                  | Mycobacterial infectious disorders                                 | Infections and infestations                                            |
| Distributive shock                 | Circulatory collapse and shock                                      | Decreased and nonspecific blood pressure<br>disorders and shock    | Vascular disorders                                                     |



|                                                 |                                                                   |                                                                 |                                                      |
|-------------------------------------------------|-------------------------------------------------------------------|-----------------------------------------------------------------|------------------------------------------------------|
| Superficial siderosis of central nervous system | Central nervous system vascular disorders NEC                     | Central nervous system vascular disorders                       | Nervous system disorders                             |
| Acute haemorrhagic oedema of infancy            | Skin vasculitides                                                 | Skin vascular abnormalities                                     | Skin and subcutaneous tissue disorders               |
| Post stroke depression                          | Depressive disorders                                              | Depressed mood disorders and disturbances                       | Psychiatric disorders                                |
| Vessel puncture site thrombosis                 | Administration site reactions NEC                                 | Administration site reactions                                   | General disorders and administration site conditions |
| Cerebral septic infarct                         | Sepsis, bacteraemia, viraemia and fungaemia NEC                   | Infections - pathogen unspecified                               | Infections and infestations                          |
| Cerebral haemosiderin deposition                | Central nervous system vascular disorders NEC                     | Central nervous system vascular disorders                       | Nervous system disorders                             |
| Stress echocardiogram abnormal                  | Cardiac function diagnostic procedures                            | Cardiac and vascular investigations (excl enzyme tests)         | Investigations                                       |
| Inner ear infarction                            | Inner ear disorders NEC                                           | Inner ear and VIIIth cranial nerve disorders                    | Ear and labyrinth disorders                          |
| Cerebral gas embolism                           | Central nervous system haemorrhages and cerebrovascular accidents | Central nervous system vascular disorders                       | Nervous system disorders                             |
| Cerebral small vessel ischaemic disease         | Central nervous system vascular disorders NEC                     | Central nervous system vascular disorders                       | Nervous system disorders                             |
| Metabolic cardiomyopathy                        | Cardiomyopathies                                                  | Myocardial disorders                                            | Cardiac disorders                                    |
| Inferior vena cava syndrome                     | Site specific necrosis and vascular insufficiency NEC             | Arteriosclerosis, stenosis, vascular insufficiency and necrosis | Vascular disorders                                   |
| Right ventricular heave                         | Cardiac signs and symptoms NEC                                    | Cardiac disorder signs and symptoms                             | Cardiac disorders                                    |
| Arterectomy                                     | Arterial therapeutic procedures (excl aortic)                     | Vascular therapeutic procedures                                 | Surgical and medical procedures                      |
| Basal ganglia stroke                            | Central nervous system haemorrhages and cerebrovascular accidents | Central nervous system vascular disorders                       | Nervous system disorders                             |
| Ventricular dyssynchrony                        | Myocardial disorders NEC                                          | Myocardial disorders                                            | Cardiac disorders                                    |
| Retrograde p-waves                              | ECG investigations                                                | Cardiac and vascular investigations (excl enzyme tests)         | Investigations                                       |

|                                                           |                                                                  |                                                                 |                                                |
|-----------------------------------------------------------|------------------------------------------------------------------|-----------------------------------------------------------------|------------------------------------------------|
| Brain stem microhaemorrhage                               | Central nervous system vascular disorders NEC                    | Central nervous system vascular disorders                       | Nervous system disorders                       |
| Cerebellar microhaemorrhage                               | Central nervous system vascular disorders NEC                    | Central nervous system vascular disorders                       | Nervous system disorders                       |
| Haemorrhagic vasculitis                                   | Vasculitides NEC                                                 | Vascular inflammations                                          | Vascular disorders                             |
| Carotid angioplasty                                       | Arterial therapeutic procedures (excl aortic)                    | Vascular therapeutic procedures                                 | Surgical and medical procedures                |
| Mesenteric artery stent insertion                         | Arterial therapeutic procedures (excl aortic)                    | Vascular therapeutic procedures                                 | Surgical and medical procedures                |
| Spinal artery thrombosis                                  | Central nervous system vascular disorders NEC                    | Central nervous system vascular disorders                       | Nervous system disorders                       |
| CSF bilirubin positive                                    | Cerebrospinal fluid tests (excl microbiology)                    | Neurological, special senses and psychiatric investigations     | Investigations                                 |
| Internal carotid artery kinking                           | Central nervous system vascular disorders NEC                    | Central nervous system vascular disorders                       | Nervous system disorders                       |
| Congenital hemiparesis                                    | Neurological disorders congenital NEC                            | Neurological disorders congenital                               | Congenital, familial and genetic disorders     |
| Systolic dysfunction                                      | Myocardial disorders NEC                                         | Myocardial disorders                                            | Cardiac disorders                              |
| Vertebrobasilar dolichoectasia                            | Central nervous system vascular disorders NEC                    | Central nervous system vascular disorders                       | Nervous system disorders                       |
| Cerebral revascularisation                                | Arterial therapeutic procedures (excl aortic)                    | Vascular therapeutic procedures                                 | Surgical and medical procedures                |
| Susac's syndrome                                          | Vasculitides NEC                                                 | Vascular inflammations                                          | Vascular disorders                             |
| Popliteal artery entrapment syndrome                      | Peripheral vasoconstriction, necrosis and vascular insufficiency | Arteriosclerosis, stenosis, vascular insufficiency and necrosis | Vascular disorders                             |
| Umbilical cord thrombosis                                 | Umbilical cord complications                                     | Neonatal and perinatal conditions                               | Pregnancy, puerperium and perinatal conditions |
| N-terminal prohormone brain natriuretic peptide abnormal  | Metabolism tests NEC                                             | Metabolic, nutritional and blood gas investigations             | Investigations                                 |
| N-terminal prohormone brain natriuretic peptide increased | Metabolism tests NEC                                             | Metabolic, nutritional and blood gas investigations             | Investigations                                 |
| Atrial parasystole                                        | Supraventricular arrhythmias                                     | Cardiac arrhythmias                                             | Cardiac disorders                              |

|                                       |                                                                   |                                                         |                                                |
|---------------------------------------|-------------------------------------------------------------------|---------------------------------------------------------|------------------------------------------------|
| Lenegre's disease                     | Cardiac conduction disorders                                      | Cardiac arrhythmias                                     | Cardiac disorders                              |
| Vertebral artery dissection           | Central nervous system aneurysms and dissections                  | Central nervous system vascular disorders               | Nervous system disorders                       |
| Central nervous system haemorrhage    | Central nervous system haemorrhages and cerebrovascular accidents | Central nervous system vascular disorders               | Nervous system disorders                       |
| Ovarian vein thrombosis               | Ovarian and fallopian tube disorders NEC                          | Ovarian and fallopian tube disorders                    | Reproductive system and breast disorders       |
| Artificial heart implant              | Cardiac device therapeutic procedures                             | Cardiac therapeutic procedures                          | Surgical and medical procedures                |
| Myocardial stunning                   | Ischaemic coronary artery disorders                               | Coronary artery disorders                               | Cardiac disorders                              |
| Renal vascular thrombosis             | Renal vascular and ischaemic conditions                           | Renal disorders (excl nephropathies)                    | Renal and urinary disorders                    |
| ECG electrically inactive area        | ECG investigations                                                | Cardiac and vascular investigations (excl enzyme tests) | Investigations                                 |
| Prerenal failure                      | Renal failure and impairment                                      | Renal disorders (excl nephropathies)                    | Renal and urinary disorders                    |
| Carotid artery restenosis             | Cardiac and vascular procedural complications                     | Procedural related injuries and complications NEC       | Injury, poisoning and procedural complications |
| Carotid revascularisation             | Arterial therapeutic procedures (excl aortic)                     | Vascular therapeutic procedures                         | Surgical and medical procedures                |
| Peripheral endarterectomy             | Arterial therapeutic procedures (excl aortic)                     | Vascular therapeutic procedures                         | Surgical and medical procedures                |
| Peripheral artery bypass              | Arterial therapeutic procedures (excl aortic)                     | Vascular therapeutic procedures                         | Surgical and medical procedures                |
| Peripheral artery stent insertion     | Arterial therapeutic procedures (excl aortic)                     | Vascular therapeutic procedures                         | Surgical and medical procedures                |
| Peripheral artery thrombosis          | Peripheral embolism and thrombosis                                | Embolism and thrombosis                                 | Vascular disorders                             |
| Granulomatosis with polyangiitis      | Vasculitides NEC                                                  | Vascular inflammations                                  | Vascular disorders                             |
| Amyloid related imaging abnormalities | Central nervous system vascular disorders NEC                     | Central nervous system vascular disorders               | Nervous system disorders                       |
| Microvascular coronary artery disease | Ischaemic coronary artery disorders                               | Coronary artery disorders                               | Cardiac disorders                              |
| Chronic pigmented purpura             | Purpura and related conditions                                    | Skin vascular abnormalities                             | Skin and subcutaneous tissue disorders         |

|                                      |                                                                   |                                                              |                                                      |
|--------------------------------------|-------------------------------------------------------------------|--------------------------------------------------------------|------------------------------------------------------|
| Alcohol septal ablation              | Cardiac therapeutic procedures NEC                                | Cardiac therapeutic procedures                               | Surgical and medical procedures                      |
| Modified Rankin score increased      | Neurologic diagnostic procedures                                  | Neurological, special senses and psychiatric investigations  | Investigations                                       |
| Modified Rankin score decreased      | Neurologic diagnostic procedures                                  | Neurological, special senses and psychiatric investigations  | Investigations                                       |
| Pulmonary endarterectomy             | Arterial therapeutic procedures (excl aortic)                     | Vascular therapeutic procedures                              | Surgical and medical procedures                      |
| Brain stem haematoma                 | Central nervous system haemorrhages and cerebrovascular accidents | Central nervous system vascular disorders                    | Nervous system disorders                             |
| Spinal subdural haemorrhage          | Central nervous system haemorrhages and cerebrovascular accidents | Central nervous system vascular disorders                    | Nervous system disorders                             |
| Spinal subarachnoid haemorrhage      | Central nervous system haemorrhages and cerebrovascular accidents | Central nervous system vascular disorders                    | Nervous system disorders                             |
| Intracranial artery dissection       | Central nervous system aneurysms and dissections                  | Central nervous system vascular disorders                    | Nervous system disorders                             |
| Instillation site thrombosis         | Application and instillation site reactions                       | Administration site reactions                                | General disorders and administration site conditions |
| Epidural haemorrhage                 | Cerebral injuries NEC                                             | Injuries NEC                                                 | Injury, poisoning and procedural complications       |
| Obstructive shock                    | Circulatory collapse and shock                                    | Decreased and nonspecific blood pressure disorders and shock | Vascular disorders                                   |
| Microembolism                        | Non-site specific embolism and thrombosis                         | Embolism and thrombosis                                      | Vascular disorders                                   |
| Perinatal stroke                     | Central nervous system haemorrhages and cerebrovascular accidents | Central nervous system vascular disorders                    | Nervous system disorders                             |
| Portal vein cavernous transformation | Hepatic vascular disorders                                        | Hepatic and hepatobiliary disorders                          | Hepatobiliary disorders                              |
| Tachycardia induced cardiomyopathy   | Cardiomyopathies                                                  | Myocardial disorders                                         | Cardiac disorders                                    |
| Acute aortic syndrome                | Aortic aneurysms and dissections                                  | Aneurysms and artery dissections                             | Vascular disorders                                   |
| Ophthalmic vein thrombosis           | Ocular bleeding and vascular disorders NEC                        | Ocular haemorrhages and vascular disorders NEC               | Eye disorders                                        |

|                                                 |                                                                   |                                                             |                                                      |
|-------------------------------------------------|-------------------------------------------------------------------|-------------------------------------------------------------|------------------------------------------------------|
| Cardiopulmonary exercise test abnormal          | Respiratory and pulmonary function diagnostic procedures          | Respiratory and pulmonary investigations (excl blood gases) | Investigations                                       |
| Vena cava filter removal                        | Venous therapeutic procedures                                     | Vascular therapeutic procedures                             | Surgical and medical procedures                      |
| Brain stem embolism                             | Central nervous system haemorrhages and cerebrovascular accidents | Central nervous system vascular disorders                   | Nervous system disorders                             |
| Dural arteriovenous fistula                     | Central nervous system vascular disorders NEC                     | Central nervous system vascular disorders                   | Nervous system disorders                             |
| Hepatic vascular thrombosis                     | Hepatic vascular disorders                                        | Hepatic and hepatobiliary disorders                         | Hepatobiliary disorders                              |
| Stoma site thrombosis                           | Stoma complications                                               | Procedural related injuries and complications NEC           | Injury, poisoning and procedural complications       |
| Mesenteric vascular occlusion                   | Gastrointestinal vascular occlusion and infarction                | Gastrointestinal vascular conditions                        | Gastrointestinal disorders                           |
| Splenic artery thrombosis                       | Spleen disorders                                                  | Spleen, lymphatic and reticuloendothelial system disorders  | Blood and lymphatic system disorders                 |
| Splenic thrombosis                              | Spleen disorders                                                  | Spleen, lymphatic and reticuloendothelial system disorders  | Blood and lymphatic system disorders                 |
| Foetal heart rate deceleration abnormality      | Rate and rhythm disorders NEC                                     | Cardiac arrhythmias                                         | Cardiac disorders                                    |
| Baseline foetal heart rate variability disorder | Rate and rhythm disorders NEC                                     | Cardiac arrhythmias                                         | Cardiac disorders                                    |
| Junctional ectopic tachycardia                  | Supraventricular arrhythmias                                      | Cardiac arrhythmias                                         | Cardiac disorders                                    |
| Nonreassuring foetal heart rate pattern         | Rate and rhythm disorders NEC                                     | Cardiac arrhythmias                                         | Cardiac disorders                                    |
| Foetal heart rate acceleration abnormality      | Rate and rhythm disorders NEC                                     | Cardiac arrhythmias                                         | Cardiac disorders                                    |
| Radiation vasculitis                            | Radiation injuries                                                | Injuries by physical agents                                 | Injury, poisoning and procedural complications       |
| Precerebral artery thrombosis                   | Central nervous system haemorrhages and cerebrovascular accidents | Central nervous system vascular disorders                   | Nervous system disorders                             |
| Infusion site vasculitis                        | Infusion site reactions                                           | Administration site reactions                               | General disorders and administration site conditions |

## 4.6 Gallbladder disease adverse events

| Preferred term                         | High level term                                      | High level group term                | System organ class              |
|----------------------------------------|------------------------------------------------------|--------------------------------------|---------------------------------|
| Abnormal faeces                        | Faecal abnormalities NEC                             | Gastrointestinal signs and symptoms  | Gastrointestinal disorders      |
| Bile duct stone                        | Obstructive bile duct disorders (excl neoplasms)     | Bile duct disorders                  | Hepatobiliary disorders         |
| Biliary cirrhosis                      | Hepatic fibrosis and cirrhosis                       | Hepatic and hepatobiliary disorders  | Hepatobiliary disorders         |
| Biliary cirrhosis primary              | Hepatic fibrosis and cirrhosis                       | Hepatic and hepatobiliary disorders  | Hepatobiliary disorders         |
| Biliary colic                          | Bile duct infections and inflammations               | Bile duct disorders                  | Hepatobiliary disorders         |
| Biliary fibrosis                       | Hepatic fibrosis and cirrhosis                       | Hepatic and hepatobiliary disorders  | Hepatobiliary disorders         |
| Biliary fistula                        | Structural and other bile duct disorders             | Bile duct disorders                  | Hepatobiliary disorders         |
| Bilirubin conjugated increased         | Liver function analyses                              | Hepatobiliary investigations         | Investigations                  |
| Bilirubinuria                          | Urinary abnormalities                                | Urinary tract signs and symptoms     | Renal and urinary disorders     |
| Blood bilirubin increased              | Liver function analyses                              | Hepatobiliary investigations         | Investigations                  |
| Blood bilirubin unconjugated increased | Liver function analyses                              | Hepatobiliary investigations         | Investigations                  |
| Cholangiogram abnormal                 | Hepatobiliary imaging procedures                     | Hepatobiliary investigations         | Investigations                  |
| Cholangiolitis                         | Bile duct infections and inflammations               | Bile duct disorders                  | Hepatobiliary disorders         |
| Cholangitis                            | Bile duct infections and inflammations               | Bile duct disorders                  | Hepatobiliary disorders         |
| Cholangitis acute                      | Bile duct infections and inflammations               | Bile duct disorders                  | Hepatobiliary disorders         |
| Cholangitis sclerosing                 | Bile duct infections and inflammations               | Bile duct disorders                  | Hepatobiliary disorders         |
| Cholecystectomy                        | Biliary tract and gallbladder therapeutic procedures | Hepatobiliary therapeutic procedures | Surgical and medical procedures |
| Cholecystitis                          | Cholecystitis and cholelithiasis                     | Gallbladder disorders                | Hepatobiliary disorders         |
| Cholecystitis acute                    | Cholecystitis and cholelithiasis                     | Gallbladder disorders                | Hepatobiliary disorders         |
| Cholecystitis chronic                  | Cholecystitis and cholelithiasis                     | Gallbladder disorders                | Hepatobiliary disorders         |
| Cholecystogram intravenous abnormal    | Hepatobiliary imaging procedures                     | Hepatobiliary investigations         | Investigations                  |
| Cholecystostomy                        | Biliary tract and gallbladder therapeutic procedures | Hepatobiliary therapeutic procedures | Surgical and medical procedures |
| Choledochotomy                         | Biliary tract and gallbladder therapeutic procedures | Hepatobiliary therapeutic procedures | Surgical and medical procedures |
| Cholelithiasis                         | Cholecystitis and cholelithiasis                     | Gallbladder disorders                | Hepatobiliary disorders         |
| Cholelithiasis obstructive             | Cholecystitis and cholelithiasis                     | Gallbladder disorders                | Hepatobiliary disorders         |
| Cholestasis                            | Cholestasis and jaundice                             | Hepatic and hepatobiliary disorders  | Hepatobiliary disorders         |

|                                                         |                                                      |                                           |                                                |
|---------------------------------------------------------|------------------------------------------------------|-------------------------------------------|------------------------------------------------|
| Endoscopic retrograde cholangiopancreatography abnormal | Hepatobiliary imaging procedures                     | Hepatobiliary investigations              | Investigations                                 |
| Endoscopy biliary tract abnormal                        | Hepatobiliary imaging procedures                     | Hepatobiliary investigations              | Investigations                                 |
| Faeces pale                                             | Faecal abnormalities NEC                             | Gastrointestinal signs and symptoms       | Gastrointestinal disorders                     |
| Gallbladder cholesterolosis                             | Gallbladder disorders NEC                            | Gallbladder disorders                     | Hepatobiliary disorders                        |
| Gallbladder disorder                                    | Gallbladder disorders NEC                            | Gallbladder disorders                     | Hepatobiliary disorders                        |
| Gallbladder fistula                                     | Gallbladder disorders NEC                            | Gallbladder disorders                     | Hepatobiliary disorders                        |
| Gallbladder non-functioning                             | Gallbladder disorders NEC                            | Gallbladder disorders                     | Hepatobiliary disorders                        |
| Gallbladder obstruction                                 | Gallbladder disorders NEC                            | Gallbladder disorders                     | Hepatobiliary disorders                        |
| Gallbladder oedema                                      | Gallbladder disorders NEC                            | Gallbladder disorders                     | Hepatobiliary disorders                        |
| Gallbladder pain                                        | Gallbladder disorders NEC                            | Gallbladder disorders                     | Hepatobiliary disorders                        |
| Gallbladder perforation                                 | Gallbladder disorders NEC                            | Gallbladder disorders                     | Hepatobiliary disorders                        |
| Gallbladder injury                                      | Abdominal injuries NEC                               | Injuries NEC                              | Injury, poisoning and procedural complications |
| Gallstone ileus                                         | Gastrointestinal stenosis and obstruction NEC        | Gastrointestinal stenosis and obstruction | Gastrointestinal disorders                     |
| Hepatitis cholestatic                                   | Cholestasis and jaundice                             | Hepatic and hepatobiliary disorders       | Hepatobiliary disorders                        |
| Hyperbilirubinaemia                                     | Cholestasis and jaundice                             | Hepatic and hepatobiliary disorders       | Hepatobiliary disorders                        |
| Hyperplastic cholecystopathy                            | Gallbladder disorders NEC                            | Gallbladder disorders                     | Hepatobiliary disorders                        |
| Jaundice                                                | Cholestasis and jaundice                             | Hepatic and hepatobiliary disorders       | Hepatobiliary disorders                        |
| Jaundice cholestatic                                    | Cholestasis and jaundice                             | Hepatic and hepatobiliary disorders       | Hepatobiliary disorders                        |
| Jaundice extrahepatic obstructive                       | Cholestasis and jaundice                             | Hepatic and hepatobiliary disorders       | Hepatobiliary disorders                        |
| Perforation bile duct                                   | Structural and other bile duct disorders             | Bile duct disorders                       | Hepatobiliary disorders                        |
| Cholestasis of pregnancy                                | Cholestasis and jaundice                             | Hepatic and hepatobiliary disorders       | Hepatobiliary disorders                        |
| Choledochenterostomy                                    | Biliary tract and gallbladder therapeutic procedures | Hepatobiliary therapeutic procedures      | Surgical and medical procedures                |
| Cholecystocholangitis                                   | Bile duct infections and inflammations               | Bile duct disorders                       | Hepatobiliary disorders                        |
| Urine bilirubin increased                               | Liver function analyses                              | Hepatobiliary investigations              | Investigations                                 |
| Porcelain gallbladder                                   | Gallbladder disorders NEC                            | Gallbladder disorders                     | Hepatobiliary disorders                        |
| Gallbladder empyema                                     | Hepatobiliary and spleen infections                  | Infections - pathogen unspecified         | Infections and infestations                    |
| Bile duct stenosis                                      | Obstructive bile duct disorders (excl neoplasms)     | Bile duct disorders                       | Hepatobiliary disorders                        |
| Bile duct stenosis traumatic                            | Abdominal injuries NEC                               | Injuries NEC                              | Injury, poisoning and procedural complications |

|                                       |                                                             |                                                     |                                                |
|---------------------------------------|-------------------------------------------------------------|-----------------------------------------------------|------------------------------------------------|
| Bile output decreased                 | Liver function analyses                                     | Hepatobiliary investigations                        | Investigations                                 |
| Bile output abnormal                  | Liver function analyses                                     | Hepatobiliary investigations                        | Investigations                                 |
| Bile duct stent insertion             | Biliary tract and gallbladder therapeutic procedures        | Hepatobiliary therapeutic procedures                | Surgical and medical procedures                |
| Gallbladder abscess                   | Hepatobiliary and spleen infections                         | Infections - pathogen unspecified                   | Infections and infestations                    |
| Pancreatobiliary sphincterotomy       | Pancreatic therapeutic procedures                           | Gastrointestinal therapeutic procedures             | Surgical and medical procedures                |
| Biliary sphincterotomy                | Pancreatic therapeutic procedures                           | Gastrointestinal therapeutic procedures             | Surgical and medical procedures                |
| Dilatation intrahepatic duct acquired | Structural and other bile duct disorders                    | Bile duct disorders                                 | Hepatobiliary disorders                        |
| Choledochectomy                       | Biliary tract and gallbladder therapeutic procedures        | Hepatobiliary therapeutic procedures                | Surgical and medical procedures                |
| Choledochostomy                       | Biliary tract and gallbladder therapeutic procedures        | Hepatobiliary therapeutic procedures                | Surgical and medical procedures                |
| Cholelithotomy                        | Biliary tract and gallbladder therapeutic procedures        | Hepatobiliary therapeutic procedures                | Surgical and medical procedures                |
| Cholecystogram oral abnormal          | Hepatobiliary imaging procedures                            | Hepatobiliary investigations                        | Investigations                                 |
| Cholangiectasis acquired              | Structural and other bile duct disorders                    | Bile duct disorders                                 | Hepatobiliary disorders                        |
| Vanishing bile duct syndrome          | Structural and other bile duct disorders                    | Bile duct disorders                                 | Hepatobiliary disorders                        |
| Bile duct obstruction                 | Obstructive bile duct disorders (excl neoplasms)            | Bile duct disorders                                 | Hepatobiliary disorders                        |
| Biliary anastomosis                   | Biliary tract and gallbladder therapeutic procedures        | Hepatobiliary therapeutic procedures                | Surgical and medical procedures                |
| Hepatobiliary infection               | Hepatobiliary and spleen infections                         | Infections - pathogen unspecified                   | Infections and infestations                    |
| Biliary dyskinesia                    | Gallbladder disorders NEC                                   | Gallbladder disorders                               | Hepatobiliary disorders                        |
| X-ray hepatobiliary abnormal          | Hepatobiliary imaging procedures                            | Hepatobiliary investigations                        | Investigations                                 |
| Emphysematous cholecystitis           | Hepatobiliary and spleen infections                         | Infections - pathogen unspecified                   | Infections and infestations                    |
| Hydrocholecystis                      | Gallbladder disorders NEC                                   | Gallbladder disorders                               | Hepatobiliary disorders                        |
| Biliary dilatation                    | Structural and other bile duct disorders                    | Bile duct disorders                                 | Hepatobiliary disorders                        |
| Biliary tract dilation procedure      | Biliary tract and gallbladder therapeutic procedures        | Hepatobiliary therapeutic procedures                | Surgical and medical procedures                |
| Post cholecystectomy syndrome         | Cholestasis and jaundice                                    | Hepatic and hepatobiliary disorders                 | Hepatobiliary disorders                        |
| Gallbladder palpable                  | Physical examination procedures and organ system status     | Physical examination and organ system status topics | Investigations                                 |
| Post procedural bile leak             | Gastrointestinal and hepatobiliary procedural complications | Procedural related injuries and complications NEC   | Injury, poisoning and procedural complications |
| Choledocholithotomy                   | Biliary tract and gallbladder therapeutic procedures        | Hepatobiliary therapeutic procedures                | Surgical and medical procedures                |
| Biliary sepsis                        | Hepatobiliary and spleen infections                         | Infections - pathogen unspecified                   | Infections and infestations                    |
| Ultrasound biliary tract abnormal     | Hepatobiliary imaging procedures                            | Hepatobiliary investigations                        | Investigations                                 |



|                                      |                                                             |                                                   |                                                |
|--------------------------------------|-------------------------------------------------------------|---------------------------------------------------|------------------------------------------------|
| Gallbladder mucocoele                | Gallbladder disorders NEC                                   | Gallbladder disorders                             | Hepatobiliary disorders                        |
| Biopsy bile duct abnormal            | Hepatobiliary histopathology procedures                     | Hepatobiliary investigations                      | Investigations                                 |
| Biliary fistula repair               | Biliary tract and gallbladder therapeutic procedures        | Hepatobiliary therapeutic procedures              | Surgical and medical procedures                |
| Gallbladder fistula repair           | Biliary tract and gallbladder therapeutic procedures        | Hepatobiliary therapeutic procedures              | Surgical and medical procedures                |
| Biliary ischaemia                    | Structural and other bile duct disorders                    | Bile duct disorders                               | Hepatobiliary disorders                        |
| Blood bilirubin abnormal             | Liver function analyses                                     | Hepatobiliary investigations                      | Investigations                                 |
| Bile output increased                | Liver function analyses                                     | Hepatobiliary investigations                      | Investigations                                 |
| Bile duct necrosis                   | Structural and other bile duct disorders                    | Bile duct disorders                               | Hepatobiliary disorders                        |
| Haemobilia                           | Hepatic and hepatobiliary disorders NEC                     | Hepatic and hepatobiliary disorders               | Hepatobiliary disorders                        |
| Biloma                               | Hepatic and hepatobiliary disorders NEC                     | Hepatic and hepatobiliary disorders               | Hepatobiliary disorders                        |
| Gallbladder necrosis                 | Gallbladder disorders NEC                                   | Gallbladder disorders                             | Hepatobiliary disorders                        |
| Blood alkaline phosphatase increased | Tissue enzyme analyses NEC                                  | Enzyme investigations NEC                         | Investigations                                 |
| Blood alkaline phosphatase abnormal  | Tissue enzyme analyses NEC                                  | Enzyme investigations NEC                         | Investigations                                 |
| Bile culture positive                | Microbiology and serology tests NEC                         | Microbiology and serology investigations          | Investigations                                 |
| Biliary tract disorder               | Structural and other bile duct disorders                    | Bile duct disorders                               | Hepatobiliary disorders                        |
| Bilirubin excretion disorder         | Hepatic enzymes and function abnormalities                  | Hepatic and hepatobiliary disorders               | Hepatobiliary disorders                        |
| Biliary tract infection              | Hepatobiliary and spleen infections                         | Infections - pathogen unspecified                 | Infections and infestations                    |
| Biliary tract operation              | Biliary tract and gallbladder therapeutic procedures        | Hepatobiliary therapeutic procedures              | Surgical and medical procedures                |
| Cholangitis chronic                  | Bile duct infections and inflammations                      | Bile duct disorders                               | Hepatobiliary disorders                        |
| Gallbladder operation                | Biliary tract and gallbladder therapeutic procedures        | Hepatobiliary therapeutic procedures              | Surgical and medical procedures                |
| Hepatobiliary disease                | Hepatic and hepatobiliary disorders NEC                     | Hepatic and hepatobiliary disorders               | Hepatobiliary disorders                        |
| Cholecystitis infective              | Hepatobiliary and spleen infections                         | Infections - pathogen unspecified                 | Infections and infestations                    |
| Gallbladder enlargement              | Gallbladder disorders NEC                                   | Gallbladder disorders                             | Hepatobiliary disorders                        |
| Biliary abscess                      | Hepatobiliary and spleen infections                         | Infections - pathogen unspecified                 | Infections and infestations                    |
| Biliary anastomosis complication     | Gastrointestinal and hepatobiliary procedural complications | Procedural related injuries and complications NEC | Injury, poisoning and procedural complications |
| Bile duct pressure increased         | Liver function analyses                                     | Hepatobiliary investigations                      | Investigations                                 |
| Sphincter of Oddi dysfunction        | Obstructive bile duct disorders (excl neoplasms)            | Bile duct disorders                               | Hepatobiliary disorders                        |
| Lemmel's syndrome                    | Bile duct infections and inflammations                      | Bile duct disorders                               | Hepatobiliary disorders                        |

|                                               |                                                             |                                                   |                                                 |
|-----------------------------------------------|-------------------------------------------------------------|---------------------------------------------------|-------------------------------------------------|
| AIDS cholangiopathy                           | Retroviral infections                                       | Viral infectious disorders                        | Infections and infestations                     |
| Ampulla of Vater stenosis                     | Obstructive bile duct disorders (excl neoplasms)            | Bile duct disorders                               | Hepatobiliary disorders                         |
| Cholecystoenterostomy                         | Biliary tract and gallbladder therapeutic procedures        | Hepatobiliary therapeutic procedures              | Surgical and medical procedures                 |
| Bilirubin conjugated abnormal                 | Liver function analyses                                     | Hepatobiliary investigations                      | Investigations                                  |
| Cholelithiasis migration                      | Cholecystitis and cholelithiasis                            | Gallbladder disorders                             | Hepatobiliary disorders                         |
| Hepatolithectomy                              | Biliary tract and gallbladder therapeutic procedures        | Hepatobiliary therapeutic procedures              | Surgical and medical procedures                 |
| Bile duct stent removal                       | Biliary tract and gallbladder therapeutic procedures        | Hepatobiliary therapeutic procedures              | Surgical and medical procedures                 |
| Urobilinogen urine decreased                  | Liver function analyses                                     | Hepatobiliary investigations                      | Investigations                                  |
| Reynold's syndrome                            | Connective tissue disorders NEC                             | Connective tissue disorders (excl congenital)     | Musculoskeletal and connective tissue disorders |
| Biliary cast syndrome                         | Obstructive bile duct disorders (excl neoplasms)            | Bile duct disorders                               | Hepatobiliary disorders                         |
| Deficiency of bile secretion                  | Cholestasis and jaundice                                    | Hepatic and hepatobiliary disorders               | Hepatobiliary disorders                         |
| Biloma rupture                                | Hepatic and hepatobiliary disorders NEC                     | Hepatic and hepatobiliary disorders               | Hepatobiliary disorders                         |
| Gallbladder varices                           | Hepatic vascular disorders                                  | Hepatic and hepatobiliary disorders               | Hepatobiliary disorders                         |
| Limy bile syndrome                            | Gallbladder disorders NEC                                   | Gallbladder disorders                             | Hepatobiliary disorders                         |
| Cholangiostomy                                | Biliary tract and gallbladder therapeutic procedures        | Hepatobiliary therapeutic procedures              | Surgical and medical procedures                 |
| Biliary ascites                               | Peritoneal and retroperitoneal disorders                    | Peritoneal and retroperitoneal conditions         | Gastrointestinal disorders                      |
| Parenteral nutrition associated liver disease | Gastrointestinal and hepatobiliary procedural complications | Procedural related injuries and complications NEC | Injury, poisoning and procedural complications  |
| Gallbladder volvulus                          | Gallbladder disorders NEC                                   | Gallbladder disorders                             | Hepatobiliary disorders                         |

## 4.7 Immune complex adverse events

| Preferred term                | High level term                               | High level group term                       | System organ class                              |
|-------------------------------|-----------------------------------------------|---------------------------------------------|-------------------------------------------------|
| Acute psychosis               | Psychotic disorder NEC                        | Schizophrenia and other psychotic disorders | Psychiatric disorders                           |
| Aortitis                      | Aortic inflammatory disorders                 | Vascular inflammations                      | Vascular disorders                              |
| Arteritis                     | Arterial inflammations                        | Vascular inflammations                      | Vascular disorders                              |
| Arteritis coronary            | Coronary artery disorders NEC                 | Coronary artery disorders                   | Cardiac disorders                               |
| Arthritis                     | Arthropathies NEC                             | Joint disorders                             | Musculoskeletal and connective tissue disorders |
| Atonic seizures               | Seizures and seizure disorders NEC            | Seizures (incl subtypes)                    | Nervous system disorders                        |
| Behcet's syndrome             | Vasculitides NEC                              | Vascular inflammations                      | Vascular disorders                              |
| Cardiolipin antibody positive | Autoimmunity analyses                         | Immunology and allergy investigations       | Investigations                                  |
| Cerebral arteritis            | Central nervous system vascular disorders NEC | Central nervous system vascular disorders   | Nervous system disorders                        |
| Complex partial seizures      | Partial complex seizures                      | Seizures (incl subtypes)                    | Nervous system disorders                        |
| Convulsion                    | Seizures and seizure disorders NEC            | Seizures (incl subtypes)                    | Nervous system disorders                        |
| Convulsions local             | Seizures and seizure disorders NEC            | Seizures (incl subtypes)                    | Nervous system disorders                        |
| Cryoglobulinaemia             | Vasculitides NEC                              | Vascular inflammations                      | Vascular disorders                              |
| Cryoglobulins present         | Immunoglobulin analyses                       | Immunology and allergy investigations       | Investigations                                  |
| Cutaneous vasculitis          | Skin vasculitides                             | Skin vascular abnormalities                 | Skin and subcutaneous tissue disorders          |
| Diffuse vasculitis            | Vasculitides NEC                              | Vascular inflammations                      | Vascular disorders                              |
| Epilepsy                      | Seizures and seizure disorders NEC            | Seizures (incl subtypes)                    | Nervous system disorders                        |
| Erythema induratum            | Tuberculous infections                        | Mycobacterial infectious disorders          | Infections and infestations                     |

|                                          |                                           |                                                     |                                        |
|------------------------------------------|-------------------------------------------|-----------------------------------------------------|----------------------------------------|
| Generalised non-convulsive epilepsy      | Absence seizures                          | Seizures (incl subtypes)                            | Nervous system disorders               |
| Glomerulonephritis membranoproliferative | Glomerulonephritis and nephrotic syndrome | Nephropathies                                       | Renal and urinary disorders            |
| Glomerulonephritis membranous            | Glomerulonephritis and nephrotic syndrome | Nephropathies                                       | Renal and urinary disorders            |
| Glomerulonephritis proliferative         | Glomerulonephritis and nephrotic syndrome | Nephropathies                                       | Renal and urinary disorders            |
| Goodpasture's syndrome                   | Glomerulonephritis and nephrotic syndrome | Nephropathies                                       | Renal and urinary disorders            |
| Guillain-Barre syndrome                  | Acute polyneuropathies                    | Peripheral neuropathies                             | Nervous system disorders               |
| Haemolysis                               | Haemolyses NEC                            | Haemolyses and related conditions                   | Blood and lymphatic system disorders   |
| Haemolytic anaemia                       | Anaemias haemolytic NEC                   | Haemolyses and related conditions                   | Blood and lymphatic system disorders   |
| Henoch-Schonlein purpura                 | Purpura and related conditions            | Skin vascular abnormalities                         | Skin and subcutaneous tissue disorders |
| Hypersensitivity vasculitis              | Skin vasculitides                         | Skin vascular abnormalities                         | Skin and subcutaneous tissue disorders |
| IgA nephropathy                          | Glomerulonephritis and nephrotic syndrome | Nephropathies                                       | Renal and urinary disorders            |
| Kawasaki's disease                       | Arterial inflammations                    | Vascular inflammations                              | Vascular disorders                     |
| LE cells present                         | Autoimmunity analyses                     | Immunology and allergy investigations               | Investigations                         |
| Leukopenia                               | Leukopenias NEC                           | White blood cell disorders                          | Blood and lymphatic system disorders   |
| Lupus encephalitis                       | Encephalitis NEC                          | Central nervous system infections and inflammations | Nervous system disorders               |
| Lupus nephritis                          | Nephritis NEC                             | Nephropathies                                       | Renal and urinary disorders            |
| Lymphocyte count decreased               | White blood cell analyses                 | Haematology investigations (incl blood groups)      | Investigations                         |
| Lymphopenia                              | Leukopenias NEC                           | White blood cell disorders                          | Blood and lymphatic system disorders   |
| Mouth ulceration                         | Stomatitis and ulceration                 | Oral soft tissue conditions                         | Gastrointestinal disorders             |
| Nephritis                                | Nephritis NEC                             | Nephropathies                                       | Renal and urinary disorders            |

|                           |                                                                 |                                                                    |                                                      |
|---------------------------|-----------------------------------------------------------------|--------------------------------------------------------------------|------------------------------------------------------|
| Nodular vasculitis        | Skin vasculitides                                               | Skin vascular abnormalities                                        | Skin and subcutaneous tissue disorders               |
| Pericardial effusion      | Pericardial disorders NEC                                       | Pericardial disorders                                              | Cardiac disorders                                    |
| Pericarditis              | Noninfectious pericarditis                                      | Pericardial disorders                                              | Cardiac disorders                                    |
| Petit mal epilepsy        | Absence seizures                                                | Seizures (incl subtypes)                                           | Nervous system disorders                             |
| Pharyngeal ulceration     | Pharyngeal disorders (excl infections and neoplasms)            | Upper respiratory tract disorders (excl infections)                | Respiratory, thoracic and mediastinal disorders      |
| Photosensitivity reaction | Photosensitivity and photodermatosis conditions                 | Epidermal and dermal conditions                                    | Skin and subcutaneous tissue disorders               |
| Plasma viscosity abnormal | Haematological analyses NEC                                     | Haematology investigations (incl blood groups)                     | Investigations                                       |
| Platelet count decreased  | Platelet analyses                                               | Haematology investigations (incl blood groups)                     | Investigations                                       |
| Pleural effusion          | Pneumothorax and pleural effusions NEC                          | Pleural disorders                                                  | Respiratory, thoracic and mediastinal disorders      |
| Pleural rub               | Respiratory signs and symptoms NEC                              | Respiratory disorders NEC                                          | Respiratory, thoracic and mediastinal disorders      |
| Pleurisy                  | Pleural infections and inflammations                            | Pleural disorders                                                  | Respiratory, thoracic and mediastinal disorders      |
| Polyarteritis nodosa      | Vasculitides NEC                                                | Vascular inflammations                                             | Vascular disorders                                   |
| Polyarthritits            | Arthropathies NEC                                               | Joint disorders                                                    | Musculoskeletal and connective tissue disorders      |
| Polymyalgia rheumatica    | Connective tissue disorders NEC                                 | Connective tissue disorders (excl congenital)                      | Musculoskeletal and connective tissue disorders      |
| Polyserositis             | Inflammations                                                   | General system disorders NEC                                       | General disorders and administration site conditions |
| Proteinuria               | Urinary abnormalities                                           | Urinary tract signs and symptoms                                   | Renal and urinary disorders                          |
| Psychomotor seizures      | Partial complex seizures                                        | Seizures (incl subtypes)                                           | Nervous system disorders                             |
| Psychotic behaviour       | Psychotic disorder NEC                                          | Schizophrenia and other psychotic disorders                        | Psychiatric disorders                                |
| Pulmonary vasculitis      | Lower respiratory tract inflammatory and immunologic conditions | Lower respiratory tract disorders (excl obstruction and infection) | Respiratory, thoracic and mediastinal disorders      |

|                                   |                                                            |                                                  |                                                 |
|-----------------------------------|------------------------------------------------------------|--------------------------------------------------|-------------------------------------------------|
| Renal arteritis                   | Renal vascular and ischaemic conditions                    | Renal disorders (excl nephropathies)             | Renal and urinary disorders                     |
| Renal vasculitis                  | Renal vascular and ischaemic conditions                    | Renal disorders (excl nephropathies)             | Renal and urinary disorders                     |
| Retinal vasculitis                | Retinal, choroid and vitreous infections and inflammations | Ocular infections, irritations and inflammations | Eye disorders                                   |
| Simple partial seizures           | Partial simple seizures NEC                                | Seizures (incl subtypes)                         | Nervous system disorders                        |
| SLE arthritis                     | Arthropathies NEC                                          | Joint disorders                                  | Musculoskeletal and connective tissue disorders |
| Solar dermatitis                  | Photosensitivity and photodermatosis conditions            | Epidermal and dermal conditions                  | Skin and subcutaneous tissue disorders          |
| Status epilepticus                | Seizures and seizure disorders NEC                         | Seizures (incl subtypes)                         | Nervous system disorders                        |
| Systemic lupus erythematosus      | Lupus erythematosus (incl subtypes)                        | Connective tissue disorders (excl congenital)    | Musculoskeletal and connective tissue disorders |
| Systemic lupus erythematosus rash | Rashes, eruptions and exanthems NEC                        | Epidermal and dermal conditions                  | Skin and subcutaneous tissue disorders          |
| Takayasu's arteritis              | Arterial inflammations                                     | Vascular inflammations                           | Vascular disorders                              |
| Temporal arteritis                | Arterial inflammations                                     | Vascular inflammations                           | Vascular disorders                              |
| Temporal lobe epilepsy            | Partial complex seizures                                   | Seizures (incl subtypes)                         | Nervous system disorders                        |
| Thromboangiitis obliterans        | Vasculitides NEC                                           | Vascular inflammations                           | Vascular disorders                              |
| Thrombocytopenia                  | Thrombocytopenias                                          | Platelet disorders                               | Blood and lymphatic system disorders            |
| Tongue ulceration                 | Tongue disorders                                           | Tongue conditions                                | Gastrointestinal disorders                      |
| Tonic convulsion                  | Seizures and seizure disorders NEC                         | Seizures (incl subtypes)                         | Nervous system disorders                        |
| Uncinate fits                     | Partial complex seizures                                   | Seizures (incl subtypes)                         | Nervous system disorders                        |
| Vascular purpura                  | Purpura and related conditions                             | Skin vascular abnormalities                      | Skin and subcutaneous tissue disorders          |
| Vasculitic rash                   | Skin vasculitides                                          | Skin vascular abnormalities                      | Skin and subcutaneous tissue disorders          |
| Vasculitis                        | Vasculitides NEC                                           | Vascular inflammations                           | Vascular disorders                              |

|                                                          |                                                 |                                                       |                                                 |
|----------------------------------------------------------|-------------------------------------------------|-------------------------------------------------------|-------------------------------------------------|
| Vasculitis cerebral                                      | Central nervous system vascular disorders NEC   | Central nervous system vascular disorders             | Nervous system disorders                        |
| Vasculitis necrotising                                   | Vasculitides NEC                                | Vascular inflammations                                | Vascular disorders                              |
| White blood cell count decreased                         | White blood cell analyses                       | Haematology investigations (incl blood groups)        | Investigations                                  |
| Vasculitis gastrointestinal                              | Gastrointestinal inflammatory disorders NEC     | Gastrointestinal inflammatory conditions              | Gastrointestinal disorders                      |
| Allergic granulomatous angiitis                          | Vasculitides                                    | Immune disorders NEC                                  | Immune system disorders                         |
| Rheumatoid vasculitis                                    | Vasculitides NEC                                | Vascular inflammations                                | Vascular disorders                              |
| Antiphospholipid antibodies positive                     | Autoimmunity analyses                           | Immunology and allergy investigations                 | Investigations                                  |
| Frontal lobe epilepsy                                    | Seizures and seizure disorders NEC              | Seizures (incl subtypes)                              | Nervous system disorders                        |
| Miller Fisher syndrome                                   | Acute polyneuropathies                          | Peripheral neuropathies                               | Nervous system disorders                        |
| Autonomic seizure                                        | Partial simple seizures NEC                     | Seizures (incl subtypes)                              | Nervous system disorders                        |
| Pericardial rub                                          | Pericardial disorders NEC                       | Pericardial disorders                                 | Cardiac disorders                               |
| Double stranded DNA antibody                             | Autoimmunity analyses                           | Immunology and allergy investigations                 | Investigations                                  |
| Lupus-like syndrome                                      | Lupus erythematosus (incl subtypes)             | Connective tissue disorders (excl congenital)         | Musculoskeletal and connective tissue disorders |
| Anti-neutrophil cytoplasmic antibody positive vasculitis | Vasculitides                                    | Immune disorders NEC                                  | Immune system disorders                         |
| Photodermatitis                                          | Photosensitivity and photodermatitis conditions | Epidermal and dermal conditions                       | Skin and subcutaneous tissue disorders          |
| Blood viscosity increased                                | Haematological analyses NEC                     | Haematology investigations (incl blood groups)        | Investigations                                  |
| Protein urine present                                    | Urinalysis NEC                                  | Renal and urinary tract investigations and urinalyses | Investigations                                  |
| Clonic convulsion                                        | Seizures and seizure disorders NEC              | Seizures (incl subtypes)                              | Nervous system disorders                        |
| Histone antibody positive                                | Autoimmunity analyses                           | Immunology and allergy investigations                 | Investigations                                  |

|                                                           |                                                                 |                                                                    |                                                      |
|-----------------------------------------------------------|-----------------------------------------------------------------|--------------------------------------------------------------------|------------------------------------------------------|
| Myoclonic epilepsy                                        | Seizures and seizure disorders NEC                              | Seizures (incl subtypes)                                           | Nervous system disorders                             |
| Partial seizures with secondary generalisation            | Seizures and seizure disorders NEC                              | Seizures (incl subtypes)                                           | Nervous system disorders                             |
| Viral vasculitis                                          | Viral infections NEC                                            | Viral infectious disorders                                         | Infections and infestations                          |
| Cutaneous lupus erythematosus                             | Connective tissue disorders                                     | Epidermal and dermal conditions                                    | Skin and subcutaneous tissue disorders               |
| Cogan's syndrome                                          | Iris and uveal tract infections, irritations and inflammations  | Ocular infections, irritations and inflammations                   | Eye disorders                                        |
| Atypical benign partial epilepsy                          | Seizures and seizure disorders NEC                              | Seizures (incl subtypes)                                           | Nervous system disorders                             |
| Palpable purpura                                          | Skin vasculitides                                               | Skin vascular abnormalities                                        | Skin and subcutaneous tissue disorders               |
| Lupus pneumonitis                                         | Lower respiratory tract inflammatory and immunologic conditions | Lower respiratory tract disorders (excl obstruction and infection) | Respiratory, thoracic and mediastinal disorders      |
| Chronic inflammatory demyelinating polyradiculoneuropathy | Chronic polyneuropathies                                        | Peripheral neuropathies                                            | Nervous system disorders                             |
| Neonatal lupus erythematosus                              | Connective tissue disorders congenital                          | Musculoskeletal and connective tissue disorders congenital         | Congenital, familial and genetic disorders           |
| Subacute cutaneous lupus erythematosus                    | Connective tissue disorders                                     | Epidermal and dermal conditions                                    | Skin and subcutaneous tissue disorders               |
| Acute cutaneous lupus erythematosus                       | Connective tissue disorders                                     | Epidermal and dermal conditions                                    | Skin and subcutaneous tissue disorders               |
| Chronic cutaneous lupus erythematosus                     | Connective tissue disorders                                     | Epidermal and dermal conditions                                    | Skin and subcutaneous tissue disorders               |
| Lupus vasculitis                                          | Vasculitides NEC                                                | Vascular inflammations                                             | Vascular disorders                                   |
| Pericarditis lupus                                        | Noninfectious pericarditis                                      | Pericardial disorders                                              | Cardiac disorders                                    |
| Lupus endocarditis                                        | Endocarditis NEC                                                | Endocardial disorders                                              | Cardiac disorders                                    |
| Serositis                                                 | Inflammations                                                   | General system disorders NEC                                       | General disorders and administration site conditions |
| Pleuropericarditis                                        | Noninfectious pericarditis                                      | Pericardial disorders                                              | Cardiac disorders                                    |



|                                               |                                           |                                                |                             |
|-----------------------------------------------|-------------------------------------------|------------------------------------------------|-----------------------------|
| Antinuclear antibody positive                 | Autoimmunity analyses                     | Immunology and allergy investigations          | Investigations              |
| Antineutrophil cytoplasmic antibody positive  | Autoimmunity analyses                     | Immunology and allergy investigations          | Investigations              |
| Antineutrophil cytoplasmic antibody increased | Autoimmunity analyses                     | Immunology and allergy investigations          | Investigations              |
| DNA antibody positive                         | Autoimmunity analyses                     | Immunology and allergy investigations          | Investigations              |
| Partial seizures                              | Seizures and seizure disorders NEC        | Seizures (incl subtypes)                       | Nervous system disorders    |
| Antibody test abnormal                        | Immunology analyses NEC                   | Immunology and allergy investigations          | Investigations              |
| Antibody test positive                        | Immunology analyses NEC                   | Immunology and allergy investigations          | Investigations              |
| Demyelinating polyneuropathy                  | Chronic polyneuropathies                  | Peripheral neuropathies                        | Nervous system disorders    |
| Psychotic disorder                            | Psychotic disorder NEC                    | Schizophrenia and other psychotic disorders    | Psychiatric disorders       |
| Peritonitis lupus                             | Peritoneal and retroperitoneal disorders  | Peritoneal and retroperitoneal conditions      | Gastrointestinal disorders  |
| Microscopic polyangiitis                      | Vasculitides NEC                          | Vascular inflammations                         | Vascular disorders          |
| Neuropsychiatric lupus                        | Nervous system disorders NEC              | Neurological disorders NEC                     | Nervous system disorders    |
| Oral mucosa erosion                           | Stomatitis and ulceration                 | Oral soft tissue conditions                    | Gastrointestinal disorders  |
| Antinuclear antibody increased                | Autoimmunity analyses                     | Immunology and allergy investigations          | Investigations              |
| Plateletcrit decreased                        | Platelet analyses                         | Haematology investigations (incl blood groups) | Investigations              |
| Pseudovasculitis                              | Vasculitides NEC                          | Vascular inflammations                         | Vascular disorders          |
| Nephritic syndrome                            | Glomerulonephritis and nephrotic syndrome | Nephropathies                                  | Renal and urinary disorders |
| Lupus myocarditis                             | Noninfectious myocarditis                 | Myocardial disorders                           | Cardiac disorders           |
| Beta-2 glycoprotein antibody positive         | Autoimmunity analyses                     | Immunology and allergy investigations          | Investigations              |
| Mesangioproliferative glomerulonephritis      | Glomerulonephritis and nephrotic syndrome | Nephropathies                                  | Renal and urinary disorders |

|                                                               |                                                                |                                                           |                                                                     |
|---------------------------------------------------------------|----------------------------------------------------------------|-----------------------------------------------------------|---------------------------------------------------------------------|
| Ocular vasculitis                                             | Ocular infections, inflammations and associated manifestations | Ocular infections, irritations and inflammations          | Eye disorders                                                       |
| Segmented hyalinising vasculitis                              | Skin vasculitides                                              | Skin vascular abnormalities                               | Skin and subcutaneous tissue disorders                              |
| Urinary casts present                                         | Urinalysis NEC                                                 | Renal and urinary tract investigations and urinalyses     | Investigations                                                      |
| Systemic lupus erythematosus disease activity index increased | Investigations NEC                                             | Investigations, imaging and histopathology procedures NEC | Investigations                                                      |
| Systemic lupus erythematosus disease activity index decreased | Investigations NEC                                             | Investigations, imaging and histopathology procedures NEC | Investigations                                                      |
| Systemic lupus erythematosus disease activity index abnormal  | Investigations NEC                                             | Investigations, imaging and histopathology procedures NEC | Investigations                                                      |
| Lupus hepatitis                                               | Hepatocellular damage and hepatitis NEC                        | Hepatic and hepatobiliary disorders                       | Hepatobiliary disorders                                             |
| Lupus enteritis                                               | Gastrointestinal inflammatory disorders NEC                    | Gastrointestinal inflammatory conditions                  | Gastrointestinal disorders                                          |
| Shrinking lung syndrome                                       | Diaphragmatic disorders                                        | Thoracic disorders (excl lung and pleura)                 | Respiratory, thoracic and mediastinal disorders                     |
| Lupus pancreatitis                                            | Acute and chronic pancreatitis                                 | Exocrine pancreas conditions                              | Gastrointestinal disorders                                          |
| Butterfly rash                                                | Rashes, eruptions and exanths NEC                              | Epidermal and dermal conditions                           | Skin and subcutaneous tissue disorders                              |
| Injection site vasculitis                                     | Injection site reactions                                       | Administration site reactions                             | General disorders and administration site conditions                |
| Capillaritis                                                  | Skin vasculitides                                              | Skin vascular abnormalities                               | Skin and subcutaneous tissue disorders                              |
| Henoch-Schonlein purpura nephritis                            | Glomerulonephritis and nephrotic syndrome                      | Nephropathies                                             | Renal and urinary disorders                                         |
| Langerhans' cell histiocytosis                                | Histiocytoses                                                  | Haematopoietic neoplasms (excl leukaemias and lymphomas)  | Neoplasms benign, malignant and unspecified (incl cysts and polyps) |
| Double stranded DNA antibody positive                         | Autoimmunity analyses                                          | Immunology and allergy investigations                     | Investigations                                                      |
| Antiribosomal P antibody positive                             | Autoimmunity analyses                                          | Immunology and allergy investigations                     | Investigations                                                      |

|                                      |                                      |                                                   |                                                      |
|--------------------------------------|--------------------------------------|---------------------------------------------------|------------------------------------------------------|
| Type 2 lepra reaction                | Leprous infections                   | Mycobacterial infectious disorders                | Infections and infestations                          |
| Acute haemorrhagic oedema of infancy | Skin vasculitides                    | Skin vascular abnormalities                       | Skin and subcutaneous tissue disorders               |
| Haemorrhagic vasculitis              | Vasculitides NEC                     | Vascular inflammations                            | Vascular disorders                                   |
| Anti-neuronal antibody positive      | Autoimmunity analyses                | Immunology and allergy investigations             | Investigations                                       |
| Granulomatosis with polyangiitis     | Vasculitides NEC                     | Vascular inflammations                            | Vascular disorders                                   |
| Chronic pigmented purpura            | Purpura and related conditions       | Skin vascular abnormalities                       | Skin and subcutaneous tissue disorders               |
| Lupus pleurisy                       | Pleural infections and inflammations | Pleural disorders                                 | Respiratory, thoracic and mediastinal disorders      |
| Radiation vasculitis                 | Radiation injuries                   | Injuries by physical agents                       | Injury, poisoning and procedural complications       |
| Lupus cystitis                       | Bladder infections and inflammations | Bladder and bladder neck disorders (excl calculi) | Renal and urinary disorders                          |
| Infusion site vasculitis             | Infusion site reactions              | Administration site reactions                     | General disorders and administration site conditions |

## 4.8 Injection site reactions

| Preferred term                 | High level term                             | High level group term             | System organ class                                   |
|--------------------------------|---------------------------------------------|-----------------------------------|------------------------------------------------------|
| Administration site reaction   | Administration site reactions NEC           | Administration site reactions     | General disorders and administration site conditions |
| Application site anaesthesia   | Application and instillation site reactions | Administration site reactions     | General disorders and administration site conditions |
| Application site atrophy       | Application and instillation site reactions | Administration site reactions     | General disorders and administration site conditions |
| Application site dermatitis    | Application and instillation site reactions | Administration site reactions     | General disorders and administration site conditions |
| Application site erythema      | Application and instillation site reactions | Administration site reactions     | General disorders and administration site conditions |
| Application site irritation    | Application and instillation site reactions | Administration site reactions     | General disorders and administration site conditions |
| Application site necrosis      | Application and instillation site reactions | Administration site reactions     | General disorders and administration site conditions |
| Application site oedema        | Application and instillation site reactions | Administration site reactions     | General disorders and administration site conditions |
| Application site pain          | Application and instillation site reactions | Administration site reactions     | General disorders and administration site conditions |
| Application site pruritus      | Application and instillation site reactions | Administration site reactions     | General disorders and administration site conditions |
| Application site rash          | Application and instillation site reactions | Administration site reactions     | General disorders and administration site conditions |
| Application site reaction      | Application and instillation site reactions | Administration site reactions     | General disorders and administration site conditions |
| Application site ulcer         | Application and instillation site reactions | Administration site reactions     | General disorders and administration site conditions |
| Application site warmth        | Application and instillation site reactions | Administration site reactions     | General disorders and administration site conditions |
| Injection site abscess         | Infections NEC                              | Infections - pathogen unspecified | Infections and infestations                          |
| Injection site abscess sterile | Injection site reactions                    | Administration site reactions     | General disorders and administration site conditions |
| Injection site anaesthesia     | Injection site reactions                    | Administration site reactions     | General disorders and administration site conditions |
| Injection site atrophy         | Injection site reactions                    | Administration site reactions     | General disorders and administration site conditions |

|                                 |                          |                                   |                                                      |
|---------------------------------|--------------------------|-----------------------------------|------------------------------------------------------|
| Injection site bruising         | Injection site reactions | Administration site reactions     | General disorders and administration site conditions |
| Injection site cyst             | Injection site reactions | Administration site reactions     | General disorders and administration site conditions |
| Injection site dermatitis       | Injection site reactions | Administration site reactions     | General disorders and administration site conditions |
| Injection site erosion          | Injection site reactions | Administration site reactions     | General disorders and administration site conditions |
| Injection site erythema         | Injection site reactions | Administration site reactions     | General disorders and administration site conditions |
| Injection site extravasation    | Injection site reactions | Administration site reactions     | General disorders and administration site conditions |
| Injection site fibrosis         | Injection site reactions | Administration site reactions     | General disorders and administration site conditions |
| Injection site granuloma        | Injection site reactions | Administration site reactions     | General disorders and administration site conditions |
| Injection site haematoma        | Injection site reactions | Administration site reactions     | General disorders and administration site conditions |
| Injection site haemorrhage      | Injection site reactions | Administration site reactions     | General disorders and administration site conditions |
| Injection site hypersensitivity | Injection site reactions | Administration site reactions     | General disorders and administration site conditions |
| Injection site hypertrophy      | Injection site reactions | Administration site reactions     | General disorders and administration site conditions |
| Injection site induration       | Injection site reactions | Administration site reactions     | General disorders and administration site conditions |
| Injection site infection        | Infections NEC           | Infections - pathogen unspecified | Infections and infestations                          |
| Injection site inflammation     | Injection site reactions | Administration site reactions     | General disorders and administration site conditions |
| Injection site irritation       | Injection site reactions | Administration site reactions     | General disorders and administration site conditions |
| Injection site mass             | Injection site reactions | Administration site reactions     | General disorders and administration site conditions |
| Injection site necrosis         | Injection site reactions | Administration site reactions     | General disorders and administration site conditions |
| Injection site nerve damage     | Injection site reactions | Administration site reactions     | General disorders and administration site conditions |
| Injection site oedema           | Injection site reactions | Administration site reactions     | General disorders and administration site conditions |

|                                   |                                             |                                   |                                                      |
|-----------------------------------|---------------------------------------------|-----------------------------------|------------------------------------------------------|
| Injection site pain               | Injection site reactions                    | Administration site reactions     | General disorders and administration site conditions |
| Injection site paraesthesia       | Injection site reactions                    | Administration site reactions     | General disorders and administration site conditions |
| Injection site phlebitis          | Injection site reactions                    | Administration site reactions     | General disorders and administration site conditions |
| Injection site pruritus           | Injection site reactions                    | Administration site reactions     | General disorders and administration site conditions |
| Injection site rash               | Injection site reactions                    | Administration site reactions     | General disorders and administration site conditions |
| Injection site reaction           | Injection site reactions                    | Administration site reactions     | General disorders and administration site conditions |
| Injection site thrombosis         | Injection site reactions                    | Administration site reactions     | General disorders and administration site conditions |
| Injection site ulcer              | Injection site reactions                    | Administration site reactions     | General disorders and administration site conditions |
| Injection site urticaria          | Injection site reactions                    | Administration site reactions     | General disorders and administration site conditions |
| Injection site vesicles           | Injection site reactions                    | Administration site reactions     | General disorders and administration site conditions |
| Injection site warmth             | Injection site reactions                    | Administration site reactions     | General disorders and administration site conditions |
| Instillation site pain            | Application and instillation site reactions | Administration site reactions     | General disorders and administration site conditions |
| Malabsorption from injection site | Injection site reactions                    | Administration site reactions     | General disorders and administration site conditions |
| Infusion site erythema            | Infusion site reactions                     | Administration site reactions     | General disorders and administration site conditions |
| Injection site ischaemia          | Injection site reactions                    | Administration site reactions     | General disorders and administration site conditions |
| Application site vesicles         | Application and instillation site reactions | Administration site reactions     | General disorders and administration site conditions |
| Application site dryness          | Application and instillation site reactions | Administration site reactions     | General disorders and administration site conditions |
| Application site infection        | Infections NEC                              | Infections - pathogen unspecified | Infections and infestations                          |
| Application site inflammation     | Application and instillation site reactions | Administration site reactions     | General disorders and administration site conditions |
| Application site papules          | Application and instillation site reactions | Administration site reactions     | General disorders and administration site conditions |

|                                          |                                             |                                   |                                                      |
|------------------------------------------|---------------------------------------------|-----------------------------------|------------------------------------------------------|
| Application site pustules                | Skin structures and soft tissue infections  | Infections - pathogen unspecified | Infections and infestations                          |
| Injection site joint swelling            | Injection site reactions                    | Administration site reactions     | General disorders and administration site conditions |
| Injection site joint pain                | Injection site reactions                    | Administration site reactions     | General disorders and administration site conditions |
| Injection site joint warmth              | Injection site reactions                    | Administration site reactions     | General disorders and administration site conditions |
| Injection site joint redness             | Injection site reactions                    | Administration site reactions     | General disorders and administration site conditions |
| Puncture site abscess                    | Infections NEC                              | Infections - pathogen unspecified | Infections and infestations                          |
| Injection site cellulitis                | Bacterial infections NEC                    | Bacterial infectious disorders    | Infections and infestations                          |
| Injection site coldness                  | Injection site reactions                    | Administration site reactions     | General disorders and administration site conditions |
| Application site cold feeling            | Application and instillation site reactions | Administration site reactions     | General disorders and administration site conditions |
| Application site eczema                  | Application and instillation site reactions | Administration site reactions     | General disorders and administration site conditions |
| Application site hyperaesthesia          | Application and instillation site reactions | Administration site reactions     | General disorders and administration site conditions |
| Application site nodule                  | Application and instillation site reactions | Administration site reactions     | General disorders and administration site conditions |
| Application site pallor                  | Application and instillation site reactions | Administration site reactions     | General disorders and administration site conditions |
| Application site paraesthesia            | Application and instillation site reactions | Administration site reactions     | General disorders and administration site conditions |
| Application site urticaria               | Application and instillation site reactions | Administration site reactions     | General disorders and administration site conditions |
| Application site bruise                  | Application and instillation site reactions | Administration site reactions     | General disorders and administration site conditions |
| Puncture site haemorrhage                | Administration site reactions NEC           | Administration site reactions     | General disorders and administration site conditions |
| Injection site discolouration            | Injection site reactions                    | Administration site reactions     | General disorders and administration site conditions |
| Application site discharge               | Application and instillation site reactions | Administration site reactions     | General disorders and administration site conditions |
| Injection site photosensitivity reaction | Injection site reactions                    | Administration site reactions     | General disorders and administration site conditions |

|                                          |                                             |                                   |                                                      |
|------------------------------------------|---------------------------------------------|-----------------------------------|------------------------------------------------------|
| Application site swelling                | Application and instillation site reactions | Administration site reactions     | General disorders and administration site conditions |
| Injection site swelling                  | Injection site reactions                    | Administration site reactions     | General disorders and administration site conditions |
| Infusion site induration                 | Infusion site reactions                     | Administration site reactions     | General disorders and administration site conditions |
| Infusion site pain                       | Infusion site reactions                     | Administration site reactions     | General disorders and administration site conditions |
| Infusion site warmth                     | Infusion site reactions                     | Administration site reactions     | General disorders and administration site conditions |
| Infusion site swelling                   | Infusion site reactions                     | Administration site reactions     | General disorders and administration site conditions |
| Infusion site phlebitis                  | Infusion site reactions                     | Administration site reactions     | General disorders and administration site conditions |
| Infusion site pruritus                   | Infusion site reactions                     | Administration site reactions     | General disorders and administration site conditions |
| Injection site joint movement impairment | Injection site reactions                    | Administration site reactions     | General disorders and administration site conditions |
| Puncture site reaction                   | Administration site reactions NEC           | Administration site reactions     | General disorders and administration site conditions |
| Infusion site oedema                     | Infusion site reactions                     | Administration site reactions     | General disorders and administration site conditions |
| Vessel puncture site haemorrhage         | Administration site reactions NEC           | Administration site reactions     | General disorders and administration site conditions |
| Injection site discomfort                | Injection site reactions                    | Administration site reactions     | General disorders and administration site conditions |
| Injection site calcification             | Injection site reactions                    | Administration site reactions     | General disorders and administration site conditions |
| Application site perspiration            | Application and instillation site reactions | Administration site reactions     | General disorders and administration site conditions |
| Injection site pustule                   | Skin structures and soft tissue infections  | Infections - pathogen unspecified | Infections and infestations                          |
| Infusion site ulcer                      | Infusion site reactions                     | Administration site reactions     | General disorders and administration site conditions |
| Infusion site reaction                   | Infusion site reactions                     | Administration site reactions     | General disorders and administration site conditions |
| Infusion site infection                  | Vascular infections                         | Infections - pathogen unspecified | Infections and infestations                          |
| Instillation site irritation             | Application and instillation site reactions | Administration site reactions     | General disorders and administration site conditions |



|                                            |                                             |                                   |                                                      |
|--------------------------------------------|---------------------------------------------|-----------------------------------|------------------------------------------------------|
| Injection site movement impairment         | Injection site reactions                    | Administration site reactions     | General disorders and administration site conditions |
| Infusion site inflammation                 | Infusion site reactions                     | Administration site reactions     | General disorders and administration site conditions |
| Injected limb mobility decreased           | Injection site reactions                    | Administration site reactions     | General disorders and administration site conditions |
| Injection site lymphadenopathy             | Injection site reactions                    | Administration site reactions     | General disorders and administration site conditions |
| Injection site nodule                      | Injection site reactions                    | Administration site reactions     | General disorders and administration site conditions |
| Application site abscess                   | Infections NEC                              | Infections - pathogen unspecified | Infections and infestations                          |
| Administration site pain                   | Administration site reactions NEC           | Administration site reactions     | General disorders and administration site conditions |
| Infusion site abscess                      | Vascular infections                         | Infections - pathogen unspecified | Infections and infestations                          |
| Application site mass                      | Application and instillation site reactions | Administration site reactions     | General disorders and administration site conditions |
| Embolia cutis medicamentosa                | Injection site reactions                    | Administration site reactions     | General disorders and administration site conditions |
| Application site photosensitivity reaction | Application and instillation site reactions | Administration site reactions     | General disorders and administration site conditions |
| Application site discolouration            | Application and instillation site reactions | Administration site reactions     | General disorders and administration site conditions |
| Application site scar                      | Application and instillation site reactions | Administration site reactions     | General disorders and administration site conditions |
| Injection site scar                        | Injection site reactions                    | Administration site reactions     | General disorders and administration site conditions |
| Application site alopecia                  | Application and instillation site reactions | Administration site reactions     | General disorders and administration site conditions |
| Application site folliculitis              | Bacterial infections NEC                    | Bacterial infectious disorders    | Infections and infestations                          |
| Infusion site bruising                     | Infusion site reactions                     | Administration site reactions     | General disorders and administration site conditions |
| Infusion site rash                         | Infusion site reactions                     | Administration site reactions     | General disorders and administration site conditions |
| Oral administration complication           | Administration site reactions NEC           | Administration site reactions     | General disorders and administration site conditions |
| Application site discomfort                | Application and instillation site reactions | Administration site reactions     | General disorders and administration site conditions |

|                                          |                                             |                                   |                                                      |
|------------------------------------------|---------------------------------------------|-----------------------------------|------------------------------------------------------|
| Venipuncture site rash                   | Administration site reactions NEC           | Administration site reactions     | General disorders and administration site conditions |
| Puncture site infection                  | Infections NEC                              | Infections - pathogen unspecified | Infections and infestations                          |
| Application site hypersensitivity        | Application and instillation site reactions | Administration site reactions     | General disorders and administration site conditions |
| Instillation site erythema               | Application and instillation site reactions | Administration site reactions     | General disorders and administration site conditions |
| Instillation site pruritus               | Application and instillation site reactions | Administration site reactions     | General disorders and administration site conditions |
| Instillation site reaction               | Application and instillation site reactions | Administration site reactions     | General disorders and administration site conditions |
| Instillation site foreign body sensation | Application and instillation site reactions | Administration site reactions     | General disorders and administration site conditions |
| Instillation site dryness                | Application and instillation site reactions | Administration site reactions     | General disorders and administration site conditions |
| Application site induration              | Application and instillation site reactions | Administration site reactions     | General disorders and administration site conditions |
| Vessel puncture site reaction            | Administration site reactions NEC           | Administration site reactions     | General disorders and administration site conditions |
| Vessel puncture site bruise              | Administration site reactions NEC           | Administration site reactions     | General disorders and administration site conditions |
| Vessel puncture site discharge           | Administration site reactions NEC           | Administration site reactions     | General disorders and administration site conditions |
| Injection site joint inflammation        | Injection site reactions                    | Administration site reactions     | General disorders and administration site conditions |
| Injection site joint effusion            | Injection site reactions                    | Administration site reactions     | General disorders and administration site conditions |
| Application site exfoliation             | Application and instillation site reactions | Administration site reactions     | General disorders and administration site conditions |
| Infusion site extravasation              | Infusion site reactions                     | Administration site reactions     | General disorders and administration site conditions |
| Application site burn                    | Application and instillation site reactions | Administration site reactions     | General disorders and administration site conditions |
| Application site cellulitis              | Bacterial infections NEC                    | Bacterial infectious disorders    | Infections and infestations                          |
| Application site fissure                 | Application and instillation site reactions | Administration site reactions     | General disorders and administration site conditions |
| Infusion site atrophy                    | Infusion site reactions                     | Administration site reactions     | General disorders and administration site conditions |

|                                         |                          |                                |                                                      |
|-----------------------------------------|--------------------------|--------------------------------|------------------------------------------------------|
| Infusion site cellulitis                | Bacterial infections NEC | Bacterial infectious disorders | Infections and infestations                          |
| Infusion site coldness                  | Infusion site reactions  | Administration site reactions  | General disorders and administration site conditions |
| Infusion site cyst                      | Infusion site reactions  | Administration site reactions  | General disorders and administration site conditions |
| Infusion site dermatitis                | Infusion site reactions  | Administration site reactions  | General disorders and administration site conditions |
| Infusion site discolouration            | Infusion site reactions  | Administration site reactions  | General disorders and administration site conditions |
| Infusion site erosion                   | Infusion site reactions  | Administration site reactions  | General disorders and administration site conditions |
| Infusion site fibrosis                  | Infusion site reactions  | Administration site reactions  | General disorders and administration site conditions |
| Infusion site haematoma                 | Infusion site reactions  | Administration site reactions  | General disorders and administration site conditions |
| Infusion site haemorrhage               | Infusion site reactions  | Administration site reactions  | General disorders and administration site conditions |
| Infusion site hypersensitivity          | Infusion site reactions  | Administration site reactions  | General disorders and administration site conditions |
| Infusion site hypertrophy               | Infusion site reactions  | Administration site reactions  | General disorders and administration site conditions |
| Infusion site irritation                | Infusion site reactions  | Administration site reactions  | General disorders and administration site conditions |
| Infusion site ischaemia                 | Infusion site reactions  | Administration site reactions  | General disorders and administration site conditions |
| Infusion site lymphadenopathy           | Infusion site reactions  | Administration site reactions  | General disorders and administration site conditions |
| Infusion site mass                      | Infusion site reactions  | Administration site reactions  | General disorders and administration site conditions |
| Infusion site mobility decreased        | Infusion site reactions  | Administration site reactions  | General disorders and administration site conditions |
| Infusion site necrosis                  | Infusion site reactions  | Administration site reactions  | General disorders and administration site conditions |
| Infusion site nerve damage              | Infusion site reactions  | Administration site reactions  | General disorders and administration site conditions |
| Infusion site paraesthesia              | Infusion site reactions  | Administration site reactions  | General disorders and administration site conditions |
| Infusion site photosensitivity reaction | Infusion site reactions  | Administration site reactions  | General disorders and administration site conditions |

|                                |                                             |                                   |                                                      |
|--------------------------------|---------------------------------------------|-----------------------------------|------------------------------------------------------|
| Infusion site pustule          | Skin structures and soft tissue infections  | Infections - pathogen unspecified | Infections and infestations                          |
| Infusion site scar             | Infusion site reactions                     | Administration site reactions     | General disorders and administration site conditions |
| Infusion site thrombosis       | Infusion site reactions                     | Administration site reactions     | General disorders and administration site conditions |
| Infusion site urticaria        | Infusion site reactions                     | Administration site reactions     | General disorders and administration site conditions |
| Infusion site vesicles         | Infusion site reactions                     | Administration site reactions     | General disorders and administration site conditions |
| Infusion site anaesthesia      | Infusion site reactions                     | Administration site reactions     | General disorders and administration site conditions |
| Infusion site granuloma        | Infusion site reactions                     | Administration site reactions     | General disorders and administration site conditions |
| Application site erosion       | Application and instillation site reactions | Administration site reactions     | General disorders and administration site conditions |
| Puncture site pain             | Administration site reactions NEC           | Administration site reactions     | General disorders and administration site conditions |
| Injection site discharge       | Injection site reactions                    | Administration site reactions     | General disorders and administration site conditions |
| Systemic leakage               | Administration site reactions NEC           | Administration site reactions     | General disorders and administration site conditions |
| Instillation site discomfort   | Application and instillation site reactions | Administration site reactions     | General disorders and administration site conditions |
| Instillation site lacrimation  | Application and instillation site reactions | Administration site reactions     | General disorders and administration site conditions |
| Vessel puncture site haematoma | Administration site reactions NEC           | Administration site reactions     | General disorders and administration site conditions |
| Infusion site hypoaesthesia    | Infusion site reactions                     | Administration site reactions     | General disorders and administration site conditions |
| Injection site pallor          | Injection site reactions                    | Administration site reactions     | General disorders and administration site conditions |
| Injection site papule          | Injection site reactions                    | Administration site reactions     | General disorders and administration site conditions |
| Injection site injury          | Injection site reactions                    | Administration site reactions     | General disorders and administration site conditions |
| Application site odour         | Application and instillation site reactions | Administration site reactions     | General disorders and administration site conditions |
| Application site scab          | Application and instillation site reactions | Administration site reactions     | General disorders and administration site conditions |

|                                   |                                             |                                   |                                                      |
|-----------------------------------|---------------------------------------------|-----------------------------------|------------------------------------------------------|
| Injection site scab               | Injection site reactions                    | Administration site reactions     | General disorders and administration site conditions |
| Infusion site scab                | Infusion site reactions                     | Administration site reactions     | General disorders and administration site conditions |
| Administration site infection     | Infections NEC                              | Infections - pathogen unspecified | Infections and infestations                          |
| Injection site eczema             | Injection site reactions                    | Administration site reactions     | General disorders and administration site conditions |
| Injection site streaking          | Injection site reactions                    | Administration site reactions     | General disorders and administration site conditions |
| Injection site recall reaction    | Injection site reactions                    | Administration site reactions     | General disorders and administration site conditions |
| Vessel puncture site pain         | Administration site reactions NEC           | Administration site reactions     | General disorders and administration site conditions |
| Vessel puncture site anaesthesia  | Administration site reactions NEC           | Administration site reactions     | General disorders and administration site conditions |
| Injection site dryness            | Injection site reactions                    | Administration site reactions     | General disorders and administration site conditions |
| Injection site laceration         | Injection site reactions                    | Administration site reactions     | General disorders and administration site conditions |
| Vessel puncture site pruritus     | Administration site reactions NEC           | Administration site reactions     | General disorders and administration site conditions |
| Injection site macule             | Injection site reactions                    | Administration site reactions     | General disorders and administration site conditions |
| Vessel puncture site paraesthesia | Administration site reactions NEC           | Administration site reactions     | General disorders and administration site conditions |
| Puncture site induration          | Administration site reactions NEC           | Administration site reactions     | General disorders and administration site conditions |
| Injection site vasculitis         | Injection site reactions                    | Administration site reactions     | General disorders and administration site conditions |
| Application site haematoma        | Application and instillation site reactions | Administration site reactions     | General disorders and administration site conditions |
| Infusion site exfoliation         | Infusion site reactions                     | Administration site reactions     | General disorders and administration site conditions |
| Injection site exfoliation        | Injection site reactions                    | Administration site reactions     | General disorders and administration site conditions |
| Administration site abscess       | Infections NEC                              | Infections - pathogen unspecified | Infections and infestations                          |
| Puncture site discharge           | Administration site reactions NEC           | Administration site reactions     | General disorders and administration site conditions |

|                                   |                                             |                                   |                                                      |
|-----------------------------------|---------------------------------------------|-----------------------------------|------------------------------------------------------|
| Injection site dysaesthesia       | Injection site reactions                    | Administration site reactions     | General disorders and administration site conditions |
| Infusion site discomfort          | Infusion site reactions                     | Administration site reactions     | General disorders and administration site conditions |
| Vessel puncture site inflammation | Administration site reactions NEC           | Administration site reactions     | General disorders and administration site conditions |
| Vessel puncture site swelling     | Administration site reactions NEC           | Administration site reactions     | General disorders and administration site conditions |
| Vessel puncture site thrombosis   | Administration site reactions NEC           | Administration site reactions     | General disorders and administration site conditions |
| Administration site rash          | Administration site reactions NEC           | Administration site reactions     | General disorders and administration site conditions |
| Instillation site complication    | Application and instillation site reactions | Administration site reactions     | General disorders and administration site conditions |
| Puncture site swelling            | Administration site reactions NEC           | Administration site reactions     | General disorders and administration site conditions |
| Application site telangiectasia   | Application and instillation site reactions | Administration site reactions     | General disorders and administration site conditions |
| Application site haemorrhage      | Application and instillation site reactions | Administration site reactions     | General disorders and administration site conditions |
| Vessel puncture site induration   | Administration site reactions NEC           | Administration site reactions     | General disorders and administration site conditions |
| Vessel puncture site infection    | Infections NEC                              | Infections - pathogen unspecified | Infections and infestations                          |
| Injection site plaque             | Injection site reactions                    | Administration site reactions     | General disorders and administration site conditions |
| Injection site hyperaesthesia     | Injection site reactions                    | Administration site reactions     | General disorders and administration site conditions |
| Application site acne             | Application and instillation site reactions | Administration site reactions     | General disorders and administration site conditions |
| Injection site joint discomfort   | Injection site reactions                    | Administration site reactions     | General disorders and administration site conditions |
| Instillation site paraesthesia    | Application and instillation site reactions | Administration site reactions     | General disorders and administration site conditions |
| Instillation site exfoliation     | Application and instillation site reactions | Administration site reactions     | General disorders and administration site conditions |
| Instillation site abscess         | Infections NEC                              | Infections - pathogen unspecified | Infections and infestations                          |
| Instillation site anaesthesia     | Application and instillation site reactions | Administration site reactions     | General disorders and administration site conditions |

|                                    |                                             |                                   |                                                      |
|------------------------------------|---------------------------------------------|-----------------------------------|------------------------------------------------------|
| Instillation site atrophy          | Application and instillation site reactions | Administration site reactions     | General disorders and administration site conditions |
| Instillation site burn             | Application and instillation site reactions | Administration site reactions     | General disorders and administration site conditions |
| Instillation site discharge        | Application and instillation site reactions | Administration site reactions     | General disorders and administration site conditions |
| Instillation site discolouration   | Application and instillation site reactions | Administration site reactions     | General disorders and administration site conditions |
| Instillation site erosion          | Application and instillation site reactions | Administration site reactions     | General disorders and administration site conditions |
| Instillation site haematoma        | Application and instillation site reactions | Administration site reactions     | General disorders and administration site conditions |
| Instillation site haemorrhage      | Application and instillation site reactions | Administration site reactions     | General disorders and administration site conditions |
| Instillation site hyperaesthesia   | Application and instillation site reactions | Administration site reactions     | General disorders and administration site conditions |
| Instillation site hypersensitivity | Application and instillation site reactions | Administration site reactions     | General disorders and administration site conditions |
| Instillation site induration       | Application and instillation site reactions | Administration site reactions     | General disorders and administration site conditions |
| Instillation site infection        | Infections NEC                              | Infections - pathogen unspecified | Infections and infestations                          |
| Instillation site inflammation     | Application and instillation site reactions | Administration site reactions     | General disorders and administration site conditions |
| Instillation site necrosis         | Application and instillation site reactions | Administration site reactions     | General disorders and administration site conditions |
| Instillation site nodule           | Application and instillation site reactions | Administration site reactions     | General disorders and administration site conditions |
| Instillation site odour            | Application and instillation site reactions | Administration site reactions     | General disorders and administration site conditions |
| Instillation site oedema           | Application and instillation site reactions | Administration site reactions     | General disorders and administration site conditions |
| Instillation site papules          | Application and instillation site reactions | Administration site reactions     | General disorders and administration site conditions |
| Instillation site pustules         | Skin structures and soft tissue infections  | Infections - pathogen unspecified | Infections and infestations                          |
| Instillation site rash             | Application and instillation site reactions | Administration site reactions     | General disorders and administration site conditions |
| Instillation site scab             | Application and instillation site reactions | Administration site reactions     | General disorders and administration site conditions |

|                                    |                                             |                                   |                                                      |
|------------------------------------|---------------------------------------------|-----------------------------------|------------------------------------------------------|
| Instillation site swelling         | Application and instillation site reactions | Administration site reactions     | General disorders and administration site conditions |
| Instillation site thrombosis       | Application and instillation site reactions | Administration site reactions     | General disorders and administration site conditions |
| Instillation site ulcer            | Application and instillation site reactions | Administration site reactions     | General disorders and administration site conditions |
| Instillation site urticaria        | Application and instillation site reactions | Administration site reactions     | General disorders and administration site conditions |
| Instillation site vesicles         | Application and instillation site reactions | Administration site reactions     | General disorders and administration site conditions |
| Instillation site warmth           | Application and instillation site reactions | Administration site reactions     | General disorders and administration site conditions |
| Instillation site bruise           | Application and instillation site reactions | Administration site reactions     | General disorders and administration site conditions |
| Application site laceration        | Administration site reactions NEC           | Administration site reactions     | General disorders and administration site conditions |
| Puncture site oedema               | Administration site reactions NEC           | Administration site reactions     | General disorders and administration site conditions |
| Application site hypertrophy       | Application and instillation site reactions | Administration site reactions     | General disorders and administration site conditions |
| Application site hypoaesthesia     | Application and instillation site reactions | Administration site reactions     | General disorders and administration site conditions |
| Injection site hypoaesthesia       | Injection site reactions                    | Administration site reactions     | General disorders and administration site conditions |
| Instillation site hypoaesthesia    | Application and instillation site reactions | Administration site reactions     | General disorders and administration site conditions |
| Vessel puncture site hypoaesthesia | Administration site reactions NEC           | Administration site reactions     | General disorders and administration site conditions |
| Injection site joint infection     | Bone and joint infections                   | Infections - pathogen unspecified | Infections and infestations                          |
| Administration site inflammation   | Administration site reactions NEC           | Administration site reactions     | General disorders and administration site conditions |
| Puncture site erythema             | Administration site reactions NEC           | Administration site reactions     | General disorders and administration site conditions |
| Vessel puncture site erythema      | Administration site reactions NEC           | Administration site reactions     | General disorders and administration site conditions |
| Puncture site hypoaesthesia        | Administration site reactions NEC           | Administration site reactions     | General disorders and administration site conditions |
| Administration site erythema       | Administration site reactions NEC           | Administration site reactions     | General disorders and administration site conditions |



|                          |                         |                               |                                                      |
|--------------------------|-------------------------|-------------------------------|------------------------------------------------------|
| Infusion site eczema     | Infusion site reactions | Administration site reactions | General disorders and administration site conditions |
| Infusion site vasculitis | Infusion site reactions | Administration site reactions | General disorders and administration site conditions |

#### 4.9 Elevated lipase and/or amylase adverse events

| Preferred term    | High level term         | High level group term           | System organ class                 |
|-------------------|-------------------------|---------------------------------|------------------------------------|
| Amylase           | Digestive enzymes       | Gastrointestinal investigations | Investigations                     |
| Amylase increased | Digestive enzymes       | Gastrointestinal investigations | Investigations                     |
| Lipase increased  | Digestive enzymes       | Gastrointestinal investigations | Investigations                     |
| Lipase            | Digestive enzymes       | Gastrointestinal investigations | Investigations                     |
| Lipase abnormal   | Digestive enzymes       | Gastrointestinal investigations | Investigations                     |
| Hyperamylasaemia  | Metabolic disorders NEC | Metabolism disorders NEC        | Metabolism and nutrition disorders |
| Hyperlipasaemia   | Metabolic disorders NEC | Metabolism disorders NEC        | Metabolism and nutrition disorders |
| Amylase abnormal  | Digestive enzymes       | Gastrointestinal investigations | Investigations                     |

#### 4.10 Medication error adverse events

| Preferred term                                | High level term                              | High level group term                | System organ class                                   |
|-----------------------------------------------|----------------------------------------------|--------------------------------------|------------------------------------------------------|
| Accidental overdose                           | Overdoses                                    | Medication errors                    | Injury, poisoning and procedural complications       |
| Complication of device removal                | Complications associated with device NEC     | Complications associated with device | General disorders and administration site conditions |
| Device breakage                               | Device physical property and chemical issues | Device issues                        | General disorders and administration site conditions |
| Device expulsion                              | Device issues NEC                            | Device issues                        | General disorders and administration site conditions |
| Device extrusion                              | Device issues NEC                            | Device issues                        | General disorders and administration site conditions |
| Device leakage                                | Device issues NEC                            | Device issues                        | General disorders and administration site conditions |
| Drug administered at inappropriate site       | Maladministrations                           | Medication errors                    | Injury, poisoning and procedural complications       |
| Inappropriate schedule of drug administration | Maladministrations                           | Medication errors                    | Injury, poisoning and procedural complications       |
| Intentional overdose                          | Overdoses                                    | Medication errors                    | Injury, poisoning and procedural complications       |
| Medication error                              | Medication errors NEC                        | Medication errors                    | Injury, poisoning and procedural complications       |
| Overdose                                      | Overdoses                                    | Medication errors                    | Injury, poisoning and procedural complications       |
| Wrong drug administered                       | Maladministrations                           | Medication errors                    | Injury, poisoning and procedural complications       |
| Wrong patient received medication             | Maladministrations                           | Medication errors                    | Injury, poisoning and procedural                     |

|                                |                                                             |                                                   |                                                      |
|--------------------------------|-------------------------------------------------------------|---------------------------------------------------|------------------------------------------------------|
|                                |                                                             |                                                   | complications                                        |
| Prescribed overdose            | Overdoses                                                   | Medication errors                                 | Injury, poisoning and procedural complications       |
| Medical device discomfort      | Complications associated with device NEC                    | Complications associated with device              | General disorders and administration site conditions |
| Feeding tube complication      | Gastrointestinal and hepatobiliary procedural complications | Procedural related injuries and complications NEC | Injury, poisoning and procedural complications       |
| Device failure                 | Device issues NEC                                           | Device issues                                     | General disorders and administration site conditions |
| Medical device complication    | Complications associated with device NEC                    | Complications associated with device              | General disorders and administration site conditions |
| Underdose                      | Maladministrations                                          | Medication errors                                 | Injury, poisoning and procedural complications       |
| Poor quality drug administered | Maladministrations                                          | Medication errors                                 | Injury, poisoning and procedural complications       |
| Medical device pain            | Complications associated with device NEC                    | Complications associated with device              | General disorders and administration site conditions |
| Device ineffective             | Device malfunction events NEC                               | Device issues                                     | General disorders and administration site conditions |
| Thrombosis in device           | Device malfunction events NEC                               | Device issues                                     | General disorders and administration site conditions |
| Medical device site reaction   | Complications associated with device NEC                    | Complications associated with device              | General disorders and administration site conditions |
| Device malfunction             | Device malfunction events NEC                               | Device issues                                     | General disorders and administration site conditions |
| Electromagnetic interference   | Device electrical issues                                    | Device issues                                     | General disorders and administration site conditions |

|                                         |                               |                   |                                                      |
|-----------------------------------------|-------------------------------|-------------------|------------------------------------------------------|
| Oversensing                             | Device malfunction events NEC | Device issues     | General disorders and administration site conditions |
| Undersensing                            | Device malfunction events NEC | Device issues     | General disorders and administration site conditions |
| Vaccination error                       | Medication errors NEC         | Medication errors | Injury, poisoning and procedural complications       |
| Drug dose omission                      | Maladministrations            | Medication errors | Injury, poisoning and procedural complications       |
| Drug administration error               | Maladministrations            | Medication errors | Injury, poisoning and procedural complications       |
| Drug prescribing error                  | Medication errors NEC         | Medication errors | Injury, poisoning and procedural complications       |
| Counterfeit drug administered           | Maladministrations            | Medication errors | Injury, poisoning and procedural complications       |
| Incorrect route of drug administration  | Maladministrations            | Medication errors | Injury, poisoning and procedural complications       |
| Incorrect drug dosage form administered | Maladministrations            | Medication errors | Injury, poisoning and procedural complications       |
| Incorrect drug administration rate      | Maladministrations            | Medication errors | Injury, poisoning and procedural complications       |
| Incorrect drug administration duration  | Maladministrations            | Medication errors | Injury, poisoning and procedural complications       |
| Wrong technique in drug usage process   | Maladministrations            | Medication errors | Injury, poisoning and procedural complications       |
| Drug dispensing error                   | Medication errors NEC         | Medication errors | Injury, poisoning and procedural complications       |
| Incorrect dose administered             | Maladministrations            | Medication errors | Injury, poisoning and procedural complications       |

|                                                                    |                                          |                                      |                                                      |
|--------------------------------------------------------------------|------------------------------------------|--------------------------------------|------------------------------------------------------|
| Extra dose administered                                            | Maladministrations                       | Medication errors                    | Injury, poisoning and procedural complications       |
| Documented hypersensitivity to administered drug                   | Medication monitoring errors             | Medication errors                    | Injury, poisoning and procedural complications       |
| Labelled drug-drug interaction medication error                    | Medication monitoring errors             | Medication errors                    | Injury, poisoning and procedural complications       |
| Labelled drug-food interaction medication error                    | Medication monitoring errors             | Medication errors                    | Injury, poisoning and procedural complications       |
| Labelled drug-disease interaction medication error                 | Medication monitoring errors             | Medication errors                    | Injury, poisoning and procedural complications       |
| Intercepted medication error                                       | Medication errors NEC                    | Medication errors                    | Injury, poisoning and procedural complications       |
| Circumstance or information capable of leading to medication error | Medication errors NEC                    | Medication errors                    | Injury, poisoning and procedural complications       |
| Device psychogenic complication                                    | Complications associated with device NEC | Complications associated with device | General disorders and administration site conditions |
| Complication of device insertion                                   | Complications associated with device NEC | Complications associated with device | General disorders and administration site conditions |
| Device dislocation                                                 | Device issues NEC                        | Device issues                        | General disorders and administration site conditions |
| Device occlusion                                                   | Device malfunction events NEC            | Device issues                        | General disorders and administration site conditions |
| Device related infection                                           | Infections NEC                           | Infections - pathogen unspecified    | Infections and infestations                          |
| Device lead issue                                                  | Device issues NEC                        | Device issues                        | General disorders and administration site conditions |
| Device connection issue                                            | Device issues NEC                        | Device issues                        | General disorders and administration site conditions |

|                                                                 |                                              |                                            |                                                      |
|-----------------------------------------------------------------|----------------------------------------------|--------------------------------------------|------------------------------------------------------|
| Drug dispensed to wrong patient                                 | Medication errors NEC                        | Medication errors                          | Injury, poisoning and procedural complications       |
| Intercepted drug dispensing error                               | Medication errors NEC                        | Medication errors                          | Injury, poisoning and procedural complications       |
| Intercepted drug administration error                           | Maladministrations                           | Medication errors                          | Injury, poisoning and procedural complications       |
| Intercepted wrong patient selected                              | Medication errors NEC                        | Medication errors                          | Injury, poisoning and procedural complications       |
| Device electrical finding                                       | Device electrical issues                     | Device issues                              | General disorders and administration site conditions |
| Device lead damage                                              | Device physical property and chemical issues | Device issues                              | General disorders and administration site conditions |
| Failure of child resistant mechanism for pharmaceutical product | Product packaging issues                     | Product quality issues                     | General disorders and administration site conditions |
| Device misuse                                                   | Device issues NEC                            | Device issues                              | General disorders and administration site conditions |
| Device toxicity                                                 | Poisoning and toxicity                       | Exposures, chemical injuries and poisoning | Injury, poisoning and procedural complications       |
| Device intolerance                                              | Complications associated with device NEC     | Complications associated with device       | General disorders and administration site conditions |
| Radiation overdose                                              | Overdoses                                    | Medication errors                          | Injury, poisoning and procedural complications       |
| Radiation underdose                                             | Maladministrations                           | Medication errors                          | Injury, poisoning and procedural complications       |
| Incorrect dose administered by device                           | Maladministrations                           | Medication errors                          | Injury, poisoning and procedural complications       |
| Product contamination                                           | Product contamination and sterility issues   | Product quality issues                     | General disorders and administration site conditions |

|                                 |                                              |                        |                                                      |
|---------------------------------|----------------------------------------------|------------------------|------------------------------------------------------|
| Product contamination chemical  | Product contamination and sterility issues   | Product quality issues | General disorders and administration site conditions |
| Product contamination microbial | Product contamination and sterility issues   | Product quality issues | General disorders and administration site conditions |
| Product contamination physical  | Product contamination and sterility issues   | Product quality issues | General disorders and administration site conditions |
| Product sterility lacking       | Product contamination and sterility issues   | Product quality issues | General disorders and administration site conditions |
| Needle issue                    | Device physical property and chemical issues | Device issues          | General disorders and administration site conditions |
| Syringe issue                   | Device physical property and chemical issues | Device issues          | General disorders and administration site conditions |
| Product friable                 | Product physical issues                      | Product quality issues | General disorders and administration site conditions |
| Product colour issue            | Product physical issues                      | Product quality issues | General disorders and administration site conditions |
| Product coating issue           | Product physical issues                      | Product quality issues | General disorders and administration site conditions |
| Product shape issue             | Product physical issues                      | Product quality issues | General disorders and administration site conditions |
| Liquid product physical issue   | Product physical issues                      | Product quality issues | General disorders and administration site conditions |
| Product reconstitution issue    | Product physical issues                      | Product quality issues | General disorders and administration site conditions |
| Product odour abnormal          | Product physical issues                      | Product quality issues | General disorders and administration site conditions |
| Product taste abnormal          | Product physical issues                      | Product quality issues | General disorders and administration site conditions |



|                                     |                            |                        |                                                      |
|-------------------------------------|----------------------------|------------------------|------------------------------------------------------|
| Product formulation issue           | Product quality issues NEC | Product quality issues | General disorders and administration site conditions |
| Product solubility abnormal         | Product physical issues    | Product quality issues | General disorders and administration site conditions |
| Product gel formation               | Product physical issues    | Product quality issues | General disorders and administration site conditions |
| Product dosage form issue           | Product physical issues    | Product quality issues | General disorders and administration site conditions |
| Product size issue                  | Product physical issues    | Product quality issues | General disorders and administration site conditions |
| Product deposit                     | Product physical issues    | Product quality issues | General disorders and administration site conditions |
| Product lot number issue            | Product label issues       | Product quality issues | General disorders and administration site conditions |
| Product identification number issue | Product label issues       | Product quality issues | General disorders and administration site conditions |
| Product label on wrong product      | Product label issues       | Product quality issues | General disorders and administration site conditions |
| Product barcode issue               | Product label issues       | Product quality issues | General disorders and administration site conditions |
| Product label counterfeit           | Product label issues       | Product quality issues | General disorders and administration site conditions |
| Product expiration date issue       | Product label issues       | Product quality issues | General disorders and administration site conditions |
| Physical product label issue        | Product label issues       | Product quality issues | General disorders and administration site conditions |
| Product label confusion             | Medication errors NEC      | Medication errors      | Injury, poisoning and procedural complications       |

|                                   |                            |                        |                                                      |
|-----------------------------------|----------------------------|------------------------|------------------------------------------------------|
| Product label issue               | Product label issues       | Product quality issues | General disorders and administration site conditions |
| Product outer packaging issue     | Product packaging issues   | Product quality issues | General disorders and administration site conditions |
| Product container issue           | Product packaging issues   | Product quality issues | General disorders and administration site conditions |
| Product dropper issue             | Product packaging issues   | Product quality issues | General disorders and administration site conditions |
| Product closure issue             | Product packaging issues   | Product quality issues | General disorders and administration site conditions |
| Product closure removal difficult | Product packaging issues   | Product quality issues | General disorders and administration site conditions |
| Product commingling               | Product packaging issues   | Product quality issues | General disorders and administration site conditions |
| Product container seal issue      | Product packaging issues   | Product quality issues | General disorders and administration site conditions |
| Product packaging quantity issue  | Product packaging issues   | Product quality issues | General disorders and administration site conditions |
| Product blister packaging issue   | Product packaging issues   | Product quality issues | General disorders and administration site conditions |
| Product packaging counterfeit     | Product packaging issues   | Product quality issues | General disorders and administration site conditions |
| Product measured potency issue    | Product quality issues NEC | Product quality issues | General disorders and administration site conditions |
| Product substitution issue        | Product quality issues NEC | Product quality issues | General disorders and administration site conditions |
| Product quality issue             | Product quality issues NEC | Product quality issues | General disorders and administration site conditions |

|                                                  |                                                 |                                      |                                                      |
|--------------------------------------------------|-------------------------------------------------|--------------------------------------|------------------------------------------------------|
| Incorrect product storage                        | Medication errors NEC                           | Medication errors                    | Injury, poisoning and procedural complications       |
| Product compounding quality issue                | Product quality issues NEC                      | Product quality issues               | General disorders and administration site conditions |
| Product tampering                                | Product quality issues NEC                      | Product quality issues               | General disorders and administration site conditions |
| Product counterfeit                              | Product quality issues NEC                      | Product quality issues               | General disorders and administration site conditions |
| Product name confusion                           | Medication errors NEC                           | Medication errors                    | Injury, poisoning and procedural complications       |
| Product packaging issue                          | Product packaging issues                        | Product quality issues               | General disorders and administration site conditions |
| Device related sepsis                            | Sepsis, bacteraemia, viraemia and fungaemia NEC | Infections - pathogen unspecified    | Infections and infestations                          |
| Injury associated with device                    | Complications associated with device NEC        | Complications associated with device | General disorders and administration site conditions |
| Neurological complication associated with device | Complications associated with device NEC        | Complications associated with device | General disorders and administration site conditions |
| Device alarm issue                               | Device information output issues                | Device issues                        | General disorders and administration site conditions |
| Device information output issue                  | Device information output issues                | Device issues                        | General disorders and administration site conditions |
| Device computer issue                            | Device computer issues                          | Device issues                        | General disorders and administration site conditions |
| Device electrical impedance issue                | Device electrical issues                        | Device issues                        | General disorders and administration site conditions |
| Device-device incompatibility                    | Device incompatibility issues                   | Device issues                        | General disorders and administration site conditions |

|                                |                                              |               |                                                      |
|--------------------------------|----------------------------------------------|---------------|------------------------------------------------------|
| Patient-device incompatibility | Device incompatibility issues                | Device issues | General disorders and administration site conditions |
| Device difficult to use        | Device operational issues NEC                | Device issues | General disorders and administration site conditions |
| Device signal detection issue  | Device malfunction events NEC                | Device issues | General disorders and administration site conditions |
| Device stimulation issue       | Device malfunction events NEC                | Device issues | General disorders and administration site conditions |
| Stent malfunction              | Device malfunction events NEC                | Device issues | General disorders and administration site conditions |
| Device optical issue           | Device malfunction events NEC                | Device issues | General disorders and administration site conditions |
| Device pacing issue            | Device malfunction events NEC                | Device issues | General disorders and administration site conditions |
| Device power source issue      | Device malfunction events NEC                | Device issues | General disorders and administration site conditions |
| Device capturing issue         | Device malfunction events NEC                | Device issues | General disorders and administration site conditions |
| Device issue                   | Device issues NEC                            | Device issues | General disorders and administration site conditions |
| Device damage                  | Device physical property and chemical issues | Device issues | General disorders and administration site conditions |
| Device material issue          | Device physical property and chemical issues | Device issues | General disorders and administration site conditions |
| Device chemical property issue | Device physical property and chemical issues | Device issues | General disorders and administration site conditions |
| Device colour issue            | Device physical property and chemical issues | Device issues | General disorders and administration site conditions |

|                                       |                                              |                        |                                                      |
|---------------------------------------|----------------------------------------------|------------------------|------------------------------------------------------|
| Product cleaning inadequate           | Product contamination and sterility issues   | Product quality issues | General disorders and administration site conditions |
| Product contamination with body fluid | Product contamination and sterility issues   | Product quality issues | General disorders and administration site conditions |
| Device material opacification         | Device physical property and chemical issues | Device issues          | General disorders and administration site conditions |
| Device physical property issue        | Device physical property and chemical issues | Device issues          | General disorders and administration site conditions |
| Product adhesion issue                | Product quality issues NEC                   | Product quality issues | General disorders and administration site conditions |
| Device kink                           | Device physical property and chemical issues | Device issues          | General disorders and administration site conditions |
| Wrong device used                     | Device issues NEC                            | Device issues          | General disorders and administration site conditions |
| Wrong device dispensed                | Device issues NEC                            | Device issues          | General disorders and administration site conditions |
| Drug administered in wrong device     | Maladministrations                           | Medication errors      | Injury, poisoning and procedural complications       |
| Device extension damage               | Device physical property and chemical issues | Device issues          | General disorders and administration site conditions |
| Device infusion issue                 | Device malfunction events NEC                | Device issues          | General disorders and administration site conditions |
| Device inversion                      | Device issues NEC                            | Device issues          | General disorders and administration site conditions |
| Pump reservoir issue                  | Device issues NEC                            | Device issues          | General disorders and administration site conditions |
| Device deployment issue               | Device issues NEC                            | Device issues          | General disorders and administration site conditions |

|                                                   |                                              |                                   |                                                      |
|---------------------------------------------------|----------------------------------------------|-----------------------------------|------------------------------------------------------|
| Device deposit issue                              | Device physical property and chemical issues | Device issues                     | General disorders and administration site conditions |
| Medical device entrapment                         | Device malfunction events NEC                | Device issues                     | General disorders and administration site conditions |
| Intentional medical device removal by patient     | Device issues NEC                            | Device issues                     | General disorders and administration site conditions |
| Drug administered to patient of inappropriate age | Maladministrations                           | Medication errors                 | Injury, poisoning and procedural complications       |
| Out of specification test results                 | Product quality issues NEC                   | Product quality issues            | General disorders and administration site conditions |
| Product physical issue                            | Product physical issues                      | Product quality issues            | General disorders and administration site conditions |
| Product distribution issue                        | Product quality issues NEC                   | Product quality issues            | General disorders and administration site conditions |
| Device battery issue                              | Device malfunction events NEC                | Device issues                     | General disorders and administration site conditions |
| Product origin unknown                            | Product quality issues NEC                   | Product quality issues            | General disorders and administration site conditions |
| Suspected counterfeit product                     | Product quality issues NEC                   | Product quality issues            | General disorders and administration site conditions |
| Product dosage form confusion                     | Medication errors NEC                        | Medication errors                 | Injury, poisoning and procedural complications       |
| Incomplete course of vaccination                  | Maladministrations                           | Medication errors                 | Injury, poisoning and procedural complications       |
| Cardiac haemolytic anaemia                        | Anaemias haemolytic mechanical factor        | Haemolyses and related conditions | Blood and lymphatic system disorders                 |
| Red cell fragmentation syndrome                   | Anaemias haemolytic mechanical factor        | Haemolyses and related conditions | Blood and lymphatic system disorders                 |
| Product quality control issue                     | Product quality issues NEC                   | Product quality issues            | General disorders and administration site            |

|                                                           |                                            |                             |                                                      |
|-----------------------------------------------------------|--------------------------------------------|-----------------------------|------------------------------------------------------|
|                                                           |                                            |                             | conditions                                           |
| Product process control issue                             | Product quality issues NEC                 | Product quality issues      | General disorders and administration site conditions |
| Product raw material issue                                | Product quality issues NEC                 | Product quality issues      | General disorders and administration site conditions |
| Multiple use of single-use product                        | Maladministrations                         | Medication errors           | Injury, poisoning and procedural complications       |
| Intercepted drug prescribing error                        | Medication errors NEC                      | Medication errors           | Injury, poisoning and procedural complications       |
| Inadequate aseptic technique in use of product            | Product contamination and sterility issues | Product quality issues      | General disorders and administration site conditions |
| Product package associated injury                         | Non-site specific injuries NEC             | Injuries NEC                | Injury, poisoning and procedural complications       |
| Transmission of an infectious agent via product           | Infectious transmissions                   | Ancillary infectious topics | Infections and infestations                          |
| Suspected transmission of an infectious agent via product | Infectious transmissions                   | Ancillary infectious topics | Infections and infestations                          |
| Device allergy                                            | Allergic conditions NEC                    | Allergic conditions         | Immune system disorders                              |
| Device use error                                          | Device issues NEC                          | Device issues               | General disorders and administration site conditions |
| Unintentional medical device removal                      | Device issues NEC                          | Device issues               | General disorders and administration site conditions |
| Accidental device ingestion                               | Device issues NEC                          | Device issues               | General disorders and administration site conditions |
| Prescribed underdose                                      | Maladministrations                         | Medication errors           | Injury, poisoning and procedural complications       |
| Booster dose missed                                       | Maladministrations                         | Medication errors           | Injury, poisoning and procedural complications       |

|                                                                    |                                  |                                            |                                                      |
|--------------------------------------------------------------------|----------------------------------|--------------------------------------------|------------------------------------------------------|
| Exposure via contaminated device                                   | Pathways and sources of exposure | Exposures, chemical injuries and poisoning | Injury, poisoning and procedural complications       |
| Accidental exposure to product                                     | Accidental exposures to product  | Medication errors                          | Injury, poisoning and procedural complications       |
| Accidental exposure to product by child                            | Accidental exposures to product  | Medication errors                          | Injury, poisoning and procedural complications       |
| Expired device used                                                | Device issues NEC                | Device issues                              | General disorders and administration site conditions |
| Therapeutic drug monitoring analysis not performed                 | Medication monitoring errors     | Medication errors                          | Injury, poisoning and procedural complications       |
| Therapeutic drug monitoring analysis incorrectly performed         | Medication monitoring errors     | Medication errors                          | Injury, poisoning and procedural complications       |
| Lack of injection site rotation                                    | Maladministrations               | Medication errors                          | Injury, poisoning and procedural complications       |
| Accidental use of placebo                                          | Maladministrations               | Medication errors                          | Injury, poisoning and procedural complications       |
| Product physical consistency issue                                 | Product physical issues          | Product quality issues                     | General disorders and administration site conditions |
| Incorrect dosage administered                                      | Maladministrations               | Medication errors                          | Injury, poisoning and procedural complications       |
| Intentional underdose                                              | Maladministrations               | Medication errors                          | Injury, poisoning and procedural complications       |
| Device end of service                                              | Device issues NEC                | Device issues                              | General disorders and administration site conditions |
| Device telemetry issue                                             | Device information output issues | Device issues                              | General disorders and administration site conditions |
| Circumstance or information capable of leading to device use error | Device issues NEC                | Device issues                              | General disorders and administration site conditions |



|                             |                                              |                                                   |                                                      |
|-----------------------------|----------------------------------------------|---------------------------------------------------|------------------------------------------------------|
| Product difficult to remove | Product quality issues NEC                   | Product quality issues                            | General disorders and administration site conditions |
| Device defective            | Device physical property and chemical issues | Device issues                                     | General disorders and administration site conditions |
| Medication monitoring error | Medication monitoring errors                 | Medication errors                                 | Injury, poisoning and procedural complications       |
| Embedded device             | Device issues NEC                            | Device issues                                     | General disorders and administration site conditions |
| Product packaging confusion | Medication errors NEC                        | Medication errors                                 | Injury, poisoning and procedural complications       |
| Implant subsidence          | Device issues NEC                            | Device issues                                     | General disorders and administration site conditions |
| Radiolucency around implant | Musculoskeletal procedural complications     | Procedural related injuries and complications NEC | Injury, poisoning and procedural complications       |
| Drug titration error        | Medication monitoring errors                 | Medication errors                                 | Injury, poisoning and procedural complications       |

## 4.11 Neoplasm adverse events

| Preferred term                             | High level term                       | High level group term                         | System organ class                                                  |
|--------------------------------------------|---------------------------------------|-----------------------------------------------|---------------------------------------------------------------------|
| Acanthosis nigricans                       | Skin hyperplasias and hypertrophies   | Cornification and dystrophic skin disorders   | Skin and subcutaneous tissue disorders                              |
| Acoustic neuroma                           | Neuromas                              | Nervous system neoplasms benign               | Neoplasms benign, malignant and unspecified (incl cysts and polyps) |
| Acral lentiginous melanoma                 | Skin melanomas (excl ocular)          | Skin neoplasms malignant and unspecified      | Neoplasms benign, malignant and unspecified (incl cysts and polyps) |
| Acral lentiginous melanoma stage I         | Skin melanomas (excl ocular)          | Skin neoplasms malignant and unspecified      | Neoplasms benign, malignant and unspecified (incl cysts and polyps) |
| Acral lentiginous melanoma stage II        | Skin melanomas (excl ocular)          | Skin neoplasms malignant and unspecified      | Neoplasms benign, malignant and unspecified (incl cysts and polyps) |
| Acral lentiginous melanoma stage III       | Skin melanomas (excl ocular)          | Skin neoplasms malignant and unspecified      | Neoplasms benign, malignant and unspecified (incl cysts and polyps) |
| Acral lentiginous melanoma stage IV        | Skin melanomas (excl ocular)          | Skin neoplasms malignant and unspecified      | Neoplasms benign, malignant and unspecified (incl cysts and polyps) |
| Acrochordon                                | Skin neoplasms benign                 | Cutaneous neoplasms benign                    | Neoplasms benign, malignant and unspecified (incl cysts and polyps) |
| ACTH-producing pituitary tumour            | Hormone secreting pituitary neoplasms | Endocrine neoplasms malignant and unspecified | Neoplasms benign, malignant and unspecified (incl cysts and polyps) |
| Actinic keratosis                          | Skin preneoplastic conditions NEC     | Cornification and dystrophic skin disorders   | Skin and subcutaneous tissue disorders                              |
| Acute leukaemia                            | Leukaemias acute NEC                  | Leukaemias                                    | Neoplasms benign, malignant and unspecified (incl cysts and polyps) |
| Acute lymphocytic leukaemia                | Leukaemias acute lymphocytic          | Leukaemias                                    | Neoplasms benign, malignant and unspecified (incl cysts and polyps) |
| Acute lymphocytic leukaemia (in remission) | Leukaemias acute lymphocytic          | Leukaemias                                    | Neoplasms benign, malignant and unspecified (incl cysts and polyps) |

|                                          |                                                                                 |                                                                        |                                                                     |
|------------------------------------------|---------------------------------------------------------------------------------|------------------------------------------------------------------------|---------------------------------------------------------------------|
| Acute megakaryocytic leukaemia           | Leukaemias acute myeloid                                                        | Leukaemias                                                             | Neoplasms benign, malignant and unspecified (incl cysts and polyps) |
| Acute monocytic leukaemia                | Leukaemias acute myeloid                                                        | Leukaemias                                                             | Neoplasms benign, malignant and unspecified (incl cysts and polyps) |
| Acute monocytic leukaemia (in remission) | Leukaemias acute myeloid                                                        | Leukaemias                                                             | Neoplasms benign, malignant and unspecified (incl cysts and polyps) |
| Acute myeloid leukaemia                  | Leukaemias acute myeloid                                                        | Leukaemias                                                             | Neoplasms benign, malignant and unspecified (incl cysts and polyps) |
| Acute myeloid leukaemia (in remission)   | Leukaemias acute myeloid                                                        | Leukaemias                                                             | Neoplasms benign, malignant and unspecified (incl cysts and polyps) |
| Acute myelomonocytic leukaemia           | Leukaemias acute myeloid                                                        | Leukaemias                                                             | Neoplasms benign, malignant and unspecified (incl cysts and polyps) |
| Acute promyelocytic leukaemia            | Leukaemias acute myeloid                                                        | Leukaemias                                                             | Neoplasms benign, malignant and unspecified (incl cysts and polyps) |
| Adenocarcinoma                           | Neoplasms malignant site unspecified NEC                                        | Miscellaneous and site unspecified neoplasms malignant and unspecified | Neoplasms benign, malignant and unspecified (incl cysts and polyps) |
| Adenocarcinoma gastric                   | Gastric neoplasms malignant                                                     | Gastrointestinal neoplasms malignant and unspecified                   | Neoplasms benign, malignant and unspecified (incl cysts and polyps) |
| Adenocarcinoma of colon                  | Colorectal neoplasms malignant                                                  | Gastrointestinal neoplasms malignant and unspecified                   | Neoplasms benign, malignant and unspecified (incl cysts and polyps) |
| Adenocarcinoma of the cervix             | Cervix neoplasms malignant                                                      | Reproductive neoplasms female malignant and unspecified                | Neoplasms benign, malignant and unspecified (incl cysts and polyps) |
| Adenoma benign                           | Neoplasms benign site unspecified NEC                                           | Miscellaneous and site unspecified neoplasms benign                    | Neoplasms benign, malignant and unspecified (incl cysts and polyps) |
| Adenosquamous carcinoma of the cervix    | Cervix neoplasms malignant                                                      | Reproductive neoplasms female malignant and unspecified                | Neoplasms benign, malignant and unspecified (incl cysts and polyps) |
| Adenosquamous cell lung cancer           | Non-small cell neoplasms malignant of the respiratory tract cell type specified | Respiratory and mediastinal neoplasms malignant and unspecified        | Neoplasms benign, malignant and unspecified (incl cysts and polyps) |

|                                            |                                                                                 |                                                                 |                                                                     |
|--------------------------------------------|---------------------------------------------------------------------------------|-----------------------------------------------------------------|---------------------------------------------------------------------|
| Adenosquamous cell lung cancer recurrent   | Non-small cell neoplasms malignant of the respiratory tract cell type specified | Respiratory and mediastinal neoplasms malignant and unspecified | Neoplasms benign, malignant and unspecified (incl cysts and polyps) |
| Adenosquamous cell lung cancer stage 0     | Non-small cell neoplasms malignant of the respiratory tract cell type specified | Respiratory and mediastinal neoplasms malignant and unspecified | Neoplasms benign, malignant and unspecified (incl cysts and polyps) |
| Adenosquamous cell lung cancer stage I     | Non-small cell neoplasms malignant of the respiratory tract cell type specified | Respiratory and mediastinal neoplasms malignant and unspecified | Neoplasms benign, malignant and unspecified (incl cysts and polyps) |
| Adenosquamous cell lung cancer stage II    | Non-small cell neoplasms malignant of the respiratory tract cell type specified | Respiratory and mediastinal neoplasms malignant and unspecified | Neoplasms benign, malignant and unspecified (incl cysts and polyps) |
| Adenosquamous cell lung cancer stage III   | Non-small cell neoplasms malignant of the respiratory tract cell type specified | Respiratory and mediastinal neoplasms malignant and unspecified | Neoplasms benign, malignant and unspecified (incl cysts and polyps) |
| Adenosquamous cell lung cancer stage IV    | Non-small cell neoplasms malignant of the respiratory tract cell type specified | Respiratory and mediastinal neoplasms malignant and unspecified | Neoplasms benign, malignant and unspecified (incl cysts and polyps) |
| Adrenal adenoma                            | Adrenal neoplasms benign                                                        | Endocrine neoplasms benign                                      | Neoplasms benign, malignant and unspecified (incl cysts and polyps) |
| Adrenocortical carcinoma                   | Adrenal neoplasms malignant                                                     | Endocrine neoplasms malignant and unspecified                   | Neoplasms benign, malignant and unspecified (incl cysts and polyps) |
| Adult T-cell lymphoma/leukaemia            | Adult T-cell lymphomas/leukaemias                                               | Lymphomas non-Hodgkin's T-cell                                  | Neoplasms benign, malignant and unspecified (incl cysts and polyps) |
| Adult T-cell lymphoma/leukaemia recurrent  | Adult T-cell lymphomas/leukaemias                                               | Lymphomas non-Hodgkin's T-cell                                  | Neoplasms benign, malignant and unspecified (incl cysts and polyps) |
| Adult T-cell lymphoma/leukaemia refractory | Adult T-cell lymphomas/leukaemias                                               | Lymphomas non-Hodgkin's T-cell                                  | Neoplasms benign, malignant and unspecified (incl cysts and polyps) |
| Adult T-cell lymphoma/leukaemia stage I    | Adult T-cell lymphomas/leukaemias                                               | Lymphomas non-Hodgkin's T-cell                                  | Neoplasms benign, malignant and unspecified (incl cysts and polyps) |
| Adult T-cell lymphoma/leukaemia stage II   | Adult T-cell lymphomas/leukaemias                                               | Lymphomas non-Hodgkin's T-cell                                  | Neoplasms benign, malignant and unspecified (incl cysts and polyps) |
| Adult T-cell lymphoma/leukaemia stage III  | Adult T-cell lymphomas/leukaemias                                               | Lymphomas non-Hodgkin's T-cell                                  | Neoplasms benign, malignant and unspecified (incl cysts and polyps) |

|                                          |                                        |                                                        |                                                                     |
|------------------------------------------|----------------------------------------|--------------------------------------------------------|---------------------------------------------------------------------|
| Adult T-cell lymphoma/leukaemia stage IV | Adult T-cell lymphomas/leukaemias      | Lymphomas non-Hodgkin's T-cell                         | Neoplasms benign, malignant and unspecified (incl cysts and polyps) |
| Aesthesioneuroblastoma                   | Nervous system neoplasms malignant NEC | Nervous system neoplasms malignant and unspecified NEC | Neoplasms benign, malignant and unspecified (incl cysts and polyps) |
| Aleukaemic leukaemia                     | Leukaemias NEC                         | Leukaemias                                             | Neoplasms benign, malignant and unspecified (incl cysts and polyps) |
| Alpha 1 foetoprotein abnormal            | Protein analyses NEC                   | Protein and chemistry analyses NEC                     | Investigations                                                      |
| Alpha 1 foetoprotein increased           | Protein analyses NEC                   | Protein and chemistry analyses NEC                     | Investigations                                                      |
| Alpha interferon therapy                 | Cytokine therapies                     | Therapeutic procedures and supportive care NEC         | Surgical and medical procedures                                     |
| Alveolar soft part sarcoma               | Alveolar soft part sarcomas            | Soft tissue neoplasms malignant and unspecified        | Neoplasms benign, malignant and unspecified (incl cysts and polyps) |
| Alveolar soft part sarcoma metastatic    | Alveolar soft part sarcomas            | Soft tissue neoplasms malignant and unspecified        | Neoplasms benign, malignant and unspecified (incl cysts and polyps) |
| Alveolar soft part sarcoma recurrent     | Alveolar soft part sarcomas            | Soft tissue neoplasms malignant and unspecified        | Neoplasms benign, malignant and unspecified (incl cysts and polyps) |
| Amputation of penis                      | Penile therapeutic procedures          | Male genital tract therapeutic procedures              | Surgical and medical procedures                                     |
| Anal cancer recurrent                    | Anal canal neoplasms malignant         | Gastrointestinal neoplasms malignant and unspecified   | Neoplasms benign, malignant and unspecified (incl cysts and polyps) |
| Anal cancer stage 0                      | Anal canal neoplasms malignant         | Gastrointestinal neoplasms malignant and unspecified   | Neoplasms benign, malignant and unspecified (incl cysts and polyps) |
| Anal cancer stage I                      | Anal canal neoplasms malignant         | Gastrointestinal neoplasms malignant and unspecified   | Neoplasms benign, malignant and unspecified (incl cysts and polyps) |
| Anal cancer stage II                     | Anal canal neoplasms malignant         | Gastrointestinal neoplasms malignant and unspecified   | Neoplasms benign, malignant and unspecified (incl cysts and polyps) |
| Anal cancer stage III                    | Anal canal neoplasms malignant         | Gastrointestinal neoplasms malignant and unspecified   | Neoplasms benign, malignant and unspecified (incl cysts and polyps) |

|                                                                  |                                                        |                                                        |                                                                     |
|------------------------------------------------------------------|--------------------------------------------------------|--------------------------------------------------------|---------------------------------------------------------------------|
| Anal cancer stage IV                                             | Anal canal neoplasms malignant                         | Gastrointestinal neoplasms malignant and unspecified   | Neoplasms benign, malignant and unspecified (incl cysts and polyps) |
| Anal leukoplakia                                                 | Anal and rectal disorders NEC                          | Anal and rectal conditions NEC                         | Gastrointestinal disorders                                          |
| Anal polyp                                                       | Benign neoplasms gastrointestinal (excl oral cavity)   | Benign neoplasms gastrointestinal                      | Gastrointestinal disorders                                          |
| Anal polypectomy                                                 | Anorectal therapeutic procedures                       | Gastrointestinal therapeutic procedures                | Surgical and medical procedures                                     |
| Anaplastic astrocytoma                                           | Glial tumours malignant                                | Nervous system neoplasms malignant and unspecified NEC | Neoplasms benign, malignant and unspecified (incl cysts and polyps) |
| Anaplastic large cell lymphoma T- and null-cell types            | Anaplastic large cell lymphomas T- and null-cell types | Lymphomas non-Hodgkin's T-cell                         | Neoplasms benign, malignant and unspecified (incl cysts and polyps) |
| Anaplastic large cell lymphoma T- and null-cell types recurrent  | Anaplastic large cell lymphomas T- and null-cell types | Lymphomas non-Hodgkin's T-cell                         | Neoplasms benign, malignant and unspecified (incl cysts and polyps) |
| Anaplastic large cell lymphoma T- and null-cell types refractory | Anaplastic large cell lymphomas T- and null-cell types | Lymphomas non-Hodgkin's T-cell                         | Neoplasms benign, malignant and unspecified (incl cysts and polyps) |
| Anaplastic large cell lymphoma T- and null-cell types stage I    | Anaplastic large cell lymphomas T- and null-cell types | Lymphomas non-Hodgkin's T-cell                         | Neoplasms benign, malignant and unspecified (incl cysts and polyps) |
| Anaplastic large cell lymphoma T- and null-cell types stage II   | Anaplastic large cell lymphomas T- and null-cell types | Lymphomas non-Hodgkin's T-cell                         | Neoplasms benign, malignant and unspecified (incl cysts and polyps) |
| Anaplastic large cell lymphoma T- and null-cell types stage III  | Anaplastic large cell lymphomas T- and null-cell types | Lymphomas non-Hodgkin's T-cell                         | Neoplasms benign, malignant and unspecified (incl cysts and polyps) |
| Anaplastic large cell lymphoma T- and null-cell types stage IV   | Anaplastic large cell lymphomas T- and null-cell types | Lymphomas non-Hodgkin's T-cell                         | Neoplasms benign, malignant and unspecified (incl cysts and polyps) |
| Anaplastic thyroid cancer                                        | Thyroid neoplasms malignant                            | Endocrine neoplasms malignant and unspecified          | Neoplasms benign, malignant and unspecified (incl cysts and polyps) |
| Androgen therapy                                                 | Hormonal therapeutic procedures NEC                    | Endocrine gland therapeutic procedures                 | Surgical and medical procedures                                     |
| Aneurysmal bone cyst                                             | Bone disorders NEC                                     | Bone disorders (excl congenital and fractures)         | Musculoskeletal and connective tissue disorders                     |

|                                               |                                       |                                                     |                                                                     |
|-----------------------------------------------|---------------------------------------|-----------------------------------------------------|---------------------------------------------------------------------|
| Angiocentric lymphoma                         | Angiocentric lymphomas                | Lymphomas non-Hodgkin's T-cell                      | Neoplasms benign, malignant and unspecified (incl cysts and polyps) |
| Angiocentric lymphoma recurrent               | Angiocentric lymphomas                | Lymphomas non-Hodgkin's T-cell                      | Neoplasms benign, malignant and unspecified (incl cysts and polyps) |
| Angiocentric lymphoma refractory              | Angiocentric lymphomas                | Lymphomas non-Hodgkin's T-cell                      | Neoplasms benign, malignant and unspecified (incl cysts and polyps) |
| Angiocentric lymphoma stage I                 | Angiocentric lymphomas                | Lymphomas non-Hodgkin's T-cell                      | Neoplasms benign, malignant and unspecified (incl cysts and polyps) |
| Angiocentric lymphoma stage II                | Angiocentric lymphomas                | Lymphomas non-Hodgkin's T-cell                      | Neoplasms benign, malignant and unspecified (incl cysts and polyps) |
| Angiocentric lymphoma stage III               | Angiocentric lymphomas                | Lymphomas non-Hodgkin's T-cell                      | Neoplasms benign, malignant and unspecified (incl cysts and polyps) |
| Angiocentric lymphoma stage IV                | Angiocentric lymphomas                | Lymphomas non-Hodgkin's T-cell                      | Neoplasms benign, malignant and unspecified (incl cysts and polyps) |
| Angiofibroma                                  | Neoplasms benign site unspecified NEC | Miscellaneous and site unspecified neoplasms benign | Neoplasms benign, malignant and unspecified (incl cysts and polyps) |
| Angioimmunoblastic T-cell lymphoma            | Angioimmunoblastic T-cell lymphomas   | Lymphomas non-Hodgkin's T-cell                      | Neoplasms benign, malignant and unspecified (incl cysts and polyps) |
| Angioimmunoblastic T-cell lymphoma recurrent  | Angioimmunoblastic T-cell lymphomas   | Lymphomas non-Hodgkin's T-cell                      | Neoplasms benign, malignant and unspecified (incl cysts and polyps) |
| Angioimmunoblastic T-cell lymphoma refractory | Angioimmunoblastic T-cell lymphomas   | Lymphomas non-Hodgkin's T-cell                      | Neoplasms benign, malignant and unspecified (incl cysts and polyps) |
| Angioimmunoblastic T-cell lymphoma stage I    | Angioimmunoblastic T-cell lymphomas   | Lymphomas non-Hodgkin's T-cell                      | Neoplasms benign, malignant and unspecified (incl cysts and polyps) |
| Angioimmunoblastic T-cell lymphoma stage II   | Angioimmunoblastic T-cell lymphomas   | Lymphomas non-Hodgkin's T-cell                      | Neoplasms benign, malignant and unspecified (incl cysts and polyps) |
| Angioimmunoblastic T-cell lymphoma stage III  | Angioimmunoblastic T-cell lymphomas   | Lymphomas non-Hodgkin's T-cell                      | Neoplasms benign, malignant and unspecified (incl cysts and polyps) |

|                                                |                                                         |                                                                        |                                                                     |
|------------------------------------------------|---------------------------------------------------------|------------------------------------------------------------------------|---------------------------------------------------------------------|
| Angioimmunoblastic T-cell lymphoma stage IV    | Angioimmunoblastic T-cell lymphomas                     | Lymphomas non-Hodgkin's T-cell                                         | Neoplasms benign, malignant and unspecified (incl cysts and polyps) |
| Angiosarcoma                                   | Cardiovascular neoplasms malignant and unspecified      | Miscellaneous and site unspecified neoplasms malignant and unspecified | Neoplasms benign, malignant and unspecified (incl cysts and polyps) |
| Angiosarcoma metastatic                        | Cardiovascular neoplasms malignant and unspecified      | Miscellaneous and site unspecified neoplasms malignant and unspecified | Neoplasms benign, malignant and unspecified (incl cysts and polyps) |
| Angiosarcoma recurrent                         | Cardiovascular neoplasms malignant and unspecified      | Miscellaneous and site unspecified neoplasms malignant and unspecified | Neoplasms benign, malignant and unspecified (incl cysts and polyps) |
| Antiandrogen therapy                           | Hormonal therapeutic procedures NEC                     | Endocrine gland therapeutic procedures                                 | Surgical and medical procedures                                     |
| Antioestrogen therapy                          | Hormonal therapeutic procedures NEC                     | Endocrine gland therapeutic procedures                                 | Surgical and medical procedures                                     |
| APUDoma                                        | Islet cell neoplasms and APUDoma NEC                    | Endocrine neoplasms malignant and unspecified                          | Neoplasms benign, malignant and unspecified (incl cysts and polyps) |
| Arsenical keratosis                            | Hyperkeratoses                                          | Cornification and dystrophic skin disorders                            | Skin and subcutaneous tissue disorders                              |
| Aspiration bone marrow abnormal                | Bone marrow and immune tissue histopathology procedures | Haematology investigations (incl blood groups)                         | Investigations                                                      |
| Astrocytoma                                    | Nervous system neoplasms unspecified malignancy NEC     | Nervous system neoplasms malignant and unspecified NEC                 | Neoplasms benign, malignant and unspecified (incl cysts and polyps) |
| Aural polyp                                    | Ear disorders NEC                                       | Aural disorders NEC                                                    | Ear and labyrinth disorders                                         |
| Autologous bone marrow transplantation therapy | Blood and blood product treatment                       | Haematological and lymphoid tissue therapeutic procedures              | Surgical and medical procedures                                     |
| B precursor type acute leukaemia               | Leukaemias acute lymphocytic                            | Leukaemias                                                             | Neoplasms benign, malignant and unspecified (incl cysts and polyps) |
| B-cell lymphoma                                | B-cell lymphomas NEC                                    | Lymphomas non-Hodgkin's B-cell                                         | Neoplasms benign, malignant and unspecified (incl cysts and polyps) |
| B-cell lymphoma recurrent                      | B-cell lymphomas NEC                                    | Lymphomas non-Hodgkin's B-cell                                         | Neoplasms benign, malignant and unspecified (incl cysts and polyps) |



|                                              |                                    |                                |                                                                     |
|----------------------------------------------|------------------------------------|--------------------------------|---------------------------------------------------------------------|
| B-cell lymphoma refractory                   | B-cell lymphomas NEC               | Lymphomas non-Hodgkin's B-cell | Neoplasms benign, malignant and unspecified (incl cysts and polyps) |
| B-cell lymphoma stage I                      | B-cell lymphomas NEC               | Lymphomas non-Hodgkin's B-cell | Neoplasms benign, malignant and unspecified (incl cysts and polyps) |
| B-cell lymphoma stage II                     | B-cell lymphomas NEC               | Lymphomas non-Hodgkin's B-cell | Neoplasms benign, malignant and unspecified (incl cysts and polyps) |
| B-cell lymphoma stage III                    | B-cell lymphomas NEC               | Lymphomas non-Hodgkin's B-cell | Neoplasms benign, malignant and unspecified (incl cysts and polyps) |
| B-cell lymphoma stage IV                     | B-cell lymphomas NEC               | Lymphomas non-Hodgkin's B-cell | Neoplasms benign, malignant and unspecified (incl cysts and polyps) |
| B-cell small lymphocytic lymphoma            | B-cell small lymphocytic lymphomas | Lymphomas non-Hodgkin's B-cell | Neoplasms benign, malignant and unspecified (incl cysts and polyps) |
| B-cell small lymphocytic lymphoma recurrent  | B-cell small lymphocytic lymphomas | Lymphomas non-Hodgkin's B-cell | Neoplasms benign, malignant and unspecified (incl cysts and polyps) |
| B-cell small lymphocytic lymphoma refractory | B-cell small lymphocytic lymphomas | Lymphomas non-Hodgkin's B-cell | Neoplasms benign, malignant and unspecified (incl cysts and polyps) |
| B-cell small lymphocytic lymphoma stage I    | B-cell small lymphocytic lymphomas | Lymphomas non-Hodgkin's B-cell | Neoplasms benign, malignant and unspecified (incl cysts and polyps) |
| B-cell small lymphocytic lymphoma stage II   | B-cell small lymphocytic lymphomas | Lymphomas non-Hodgkin's B-cell | Neoplasms benign, malignant and unspecified (incl cysts and polyps) |
| B-cell small lymphocytic lymphoma stage III  | B-cell small lymphocytic lymphomas | Lymphomas non-Hodgkin's B-cell | Neoplasms benign, malignant and unspecified (incl cysts and polyps) |
| B-cell small lymphocytic lymphoma stage IV   | B-cell small lymphocytic lymphomas | Lymphomas non-Hodgkin's B-cell | Neoplasms benign, malignant and unspecified (incl cysts and polyps) |
| B-cell type acute leukaemia                  | Leukaemias acute lymphocytic       | Leukaemias                     | Neoplasms benign, malignant and unspecified (incl cysts and polyps) |
| B-cell unclassifiable lymphoma high grade    | B-cell unclassifiable lymphomas    | Lymphomas non-Hodgkin's B-cell | Neoplasms benign, malignant and unspecified (incl cysts and polyps) |

|                                          |                                                              |                                                                        |                                                                     |
|------------------------------------------|--------------------------------------------------------------|------------------------------------------------------------------------|---------------------------------------------------------------------|
| B-cell unclassifiable lymphoma low grade | B-cell unclassifiable lymphomas                              | Lymphomas non-Hodgkin's B-cell                                         | Neoplasms benign, malignant and unspecified (incl cysts and polyps) |
| Barrett's oesophagus                     | Gastrointestinal mucosal dystrophies and secretion disorders | Gastrointestinal conditions NEC                                        | Gastrointestinal disorders                                          |
| Bartholin's cyst                         | Vulvovaginal cysts and neoplasms                             | Vulvovaginal disorders (excl infections and inflammations)             | Reproductive system and breast disorders                            |
| Basal cell carcinoma                     | Skin neoplasms malignant and unspecified (excl melanoma)     | Skin neoplasms malignant and unspecified                               | Neoplasms benign, malignant and unspecified (incl cysts and polyps) |
| Basosquamous carcinoma                   | Neoplasms malignant site unspecified NEC                     | Miscellaneous and site unspecified neoplasms malignant and unspecified | Neoplasms benign, malignant and unspecified (incl cysts and polyps) |
| Basosquamous carcinoma of skin           | Skin neoplasms malignant and unspecified (excl melanoma)     | Skin neoplasms malignant and unspecified                               | Neoplasms benign, malignant and unspecified (incl cysts and polyps) |
| Becker's naevus                          | Skin neoplasms benign                                        | Cutaneous neoplasms benign                                             | Neoplasms benign, malignant and unspecified (incl cysts and polyps) |
| Bence Jones proteinuria                  | Urinary abnormalities                                        | Urinary tract signs and symptoms                                       | Renal and urinary disorders                                         |
| Benign breast neoplasm                   | Breast and nipple neoplasms benign                           | Breast neoplasms benign (incl nipple)                                  | Neoplasms benign, malignant and unspecified (incl cysts and polyps) |
| Benign cardiac neoplasm                  | Cardiovascular neoplasms benign                              | Miscellaneous and site unspecified neoplasms benign                    | Neoplasms benign, malignant and unspecified (incl cysts and polyps) |
| Benign duodenal neoplasm                 | Upper gastrointestinal neoplasms benign                      | Gastrointestinal neoplasms benign                                      | Neoplasms benign, malignant and unspecified (incl cysts and polyps) |
| Benign gastric neoplasm                  | Upper gastrointestinal neoplasms benign                      | Gastrointestinal neoplasms benign                                      | Neoplasms benign, malignant and unspecified (incl cysts and polyps) |
| Benign hepatic neoplasm                  | Hepatobiliary neoplasms benign                               | Hepatic and biliary neoplasms benign                                   | Neoplasms benign, malignant and unspecified (incl cysts and polyps) |
| Benign hydatidiform mole                 | Reproductive neoplasms female benign NEC                     | Reproductive neoplasms female benign                                   | Neoplasms benign, malignant and unspecified (incl cysts and polyps) |

|                                         |                                                    |                                                                   |                                                                     |
|-----------------------------------------|----------------------------------------------------|-------------------------------------------------------------------|---------------------------------------------------------------------|
| Benign laryngeal neoplasm               | Pharyngeal and laryngeal neoplasms benign          | Respiratory and mediastinal neoplasms benign (excl mesotheliomas) | Neoplasms benign, malignant and unspecified (incl cysts and polyps) |
| Benign lung neoplasm                    | Respiratory tract and pleural neoplasms benign NEC | Respiratory and mediastinal neoplasms benign (excl mesotheliomas) | Neoplasms benign, malignant and unspecified (incl cysts and polyps) |
| Benign mediastinal neoplasm             | Mediastinal neoplasms benign                       | Respiratory and mediastinal neoplasms benign (excl mesotheliomas) | Neoplasms benign, malignant and unspecified (incl cysts and polyps) |
| Benign middle ear neoplasm              | Aural neoplasms benign                             | Miscellaneous and site unspecified neoplasms benign               | Neoplasms benign, malignant and unspecified (incl cysts and polyps) |
| Benign neoplasm of adrenal gland        | Adrenal neoplasms benign                           | Endocrine neoplasms benign                                        | Neoplasms benign, malignant and unspecified (incl cysts and polyps) |
| Benign neoplasm of bladder              | Urinary tract neoplasms benign                     | Renal and urinary tract neoplasms benign                          | Neoplasms benign, malignant and unspecified (incl cysts and polyps) |
| Benign neoplasm of cervix uteri         | Cervix neoplasms benign                            | Reproductive neoplasms female benign                              | Neoplasms benign, malignant and unspecified (incl cysts and polyps) |
| Benign neoplasm of choroid              | Ocular neoplasms benign                            | Ocular neoplasms                                                  | Neoplasms benign, malignant and unspecified (incl cysts and polyps) |
| Benign neoplasm of conjunctiva          | Ocular neoplasms benign                            | Ocular neoplasms                                                  | Neoplasms benign, malignant and unspecified (incl cysts and polyps) |
| Benign neoplasm of cornea               | Ocular neoplasms benign                            | Ocular neoplasms                                                  | Neoplasms benign, malignant and unspecified (incl cysts and polyps) |
| Benign neoplasm of epididymis           | Reproductive neoplasms male benign NEC             | Reproductive neoplasms male benign                                | Neoplasms benign, malignant and unspecified (incl cysts and polyps) |
| Benign neoplasm of eye                  | Ocular neoplasms benign                            | Ocular neoplasms                                                  | Neoplasms benign, malignant and unspecified (incl cysts and polyps) |
| Benign neoplasm of islets of Langerhans | Endocrine neoplasms benign NEC                     | Endocrine neoplasms benign                                        | Neoplasms benign, malignant and unspecified (incl cysts and polyps) |
| Benign neoplasm of lacrimal duct        | Ocular neoplasms benign                            | Ocular neoplasms                                                  | Neoplasms benign, malignant and unspecified (incl cysts and polyps) |

|                                   |                                         |                                                                   |                                                                     |
|-----------------------------------|-----------------------------------------|-------------------------------------------------------------------|---------------------------------------------------------------------|
| Benign neoplasm of lacrimal gland | Ocular neoplasms benign                 | Ocular neoplasms                                                  | Neoplasms benign, malignant and unspecified (incl cysts and polyps) |
| Benign neoplasm of orbit          | Ocular neoplasms benign                 | Ocular neoplasms                                                  | Neoplasms benign, malignant and unspecified (incl cysts and polyps) |
| Benign neoplasm of pineal gland   | Nervous system neoplasms benign NEC     | Nervous system neoplasms benign                                   | Neoplasms benign, malignant and unspecified (incl cysts and polyps) |
| Benign neoplasm of prostate       | Prostatic neoplasms benign              | Reproductive neoplasms male benign                                | Neoplasms benign, malignant and unspecified (incl cysts and polyps) |
| Benign neoplasm of retina         | Ocular neoplasms benign                 | Ocular neoplasms                                                  | Neoplasms benign, malignant and unspecified (incl cysts and polyps) |
| Benign neoplasm of scrotum        | Reproductive neoplasms male benign NEC  | Reproductive neoplasms male benign                                | Neoplasms benign, malignant and unspecified (incl cysts and polyps) |
| Benign neoplasm of skin           | Skin neoplasms benign                   | Cutaneous neoplasms benign                                        | Neoplasms benign, malignant and unspecified (incl cysts and polyps) |
| Benign neoplasm of spinal cord    | Nervous system neoplasms benign NEC     | Nervous system neoplasms benign                                   | Neoplasms benign, malignant and unspecified (incl cysts and polyps) |
| Benign neoplasm of testis         | Reproductive neoplasms male benign NEC  | Reproductive neoplasms male benign                                | Neoplasms benign, malignant and unspecified (incl cysts and polyps) |
| Benign neoplasm of thymus         | Mediastinal neoplasms benign            | Respiratory and mediastinal neoplasms benign (excl mesotheliomas) | Neoplasms benign, malignant and unspecified (incl cysts and polyps) |
| Benign neoplasm of thyroid gland  | Thyroid neoplasms benign                | Endocrine neoplasms benign                                        | Neoplasms benign, malignant and unspecified (incl cysts and polyps) |
| Benign neoplasm of ureter         | Urinary tract neoplasms benign          | Renal and urinary tract neoplasms benign                          | Neoplasms benign, malignant and unspecified (incl cysts and polyps) |
| Benign neoplasm of urethra        | Urinary tract neoplasms benign          | Renal and urinary tract neoplasms benign                          | Neoplasms benign, malignant and unspecified (incl cysts and polyps) |
| Benign oesophageal neoplasm       | Upper gastrointestinal neoplasms benign | Gastrointestinal neoplasms benign                                 | Neoplasms benign, malignant and unspecified (incl cysts and polyps) |

|                                   |                                                    |                                                                   |                                                                     |
|-----------------------------------|----------------------------------------------------|-------------------------------------------------------------------|---------------------------------------------------------------------|
| Benign ovarian tumour             | Ovarian neoplasms benign                           | Reproductive neoplasms female benign                              | Neoplasms benign, malignant and unspecified (incl cysts and polyps) |
| Benign penile neoplasm            | Reproductive neoplasms male benign NEC             | Reproductive neoplasms male benign                                | Neoplasms benign, malignant and unspecified (incl cysts and polyps) |
| Benign peritoneal neoplasm        | Gastrointestinal neoplasms benign NEC              | Gastrointestinal neoplasms benign                                 | Neoplasms benign, malignant and unspecified (incl cysts and polyps) |
| Benign pleural mesothelioma       | Mesotheliomas benign                               | Mesotheliomas                                                     | Neoplasms benign, malignant and unspecified (incl cysts and polyps) |
| Benign pleural neoplasm           | Respiratory tract and pleural neoplasms benign NEC | Respiratory and mediastinal neoplasms benign (excl mesotheliomas) | Neoplasms benign, malignant and unspecified (incl cysts and polyps) |
| Benign salivary gland neoplasm    | Lip and oral cavity neoplasms benign               | Gastrointestinal neoplasms benign                                 | Neoplasms benign, malignant and unspecified (incl cysts and polyps) |
| Benign tracheal neoplasm          | Respiratory tract and pleural neoplasms benign NEC | Respiratory and mediastinal neoplasms benign (excl mesotheliomas) | Neoplasms benign, malignant and unspecified (incl cysts and polyps) |
| Benign vaginal neoplasm           | Vaginal neoplasms benign                           | Reproductive neoplasms female benign                              | Neoplasms benign, malignant and unspecified (incl cysts and polyps) |
| Benign vulval neoplasm            | Vulval neoplasms benign                            | Reproductive neoplasms female benign                              | Neoplasms benign, malignant and unspecified (incl cysts and polyps) |
| Beta interferon therapy           | Cytokine therapies                                 | Therapeutic procedures and supportive care NEC                    | Surgical and medical procedures                                     |
| Bile duct adenocarcinoma          | Bile duct neoplasms malignant                      | Hepatobiliary neoplasms malignant and unspecified                 | Neoplasms benign, malignant and unspecified (incl cysts and polyps) |
| Bile duct adenosquamous carcinoma | Bile duct neoplasms malignant                      | Hepatobiliary neoplasms malignant and unspecified                 | Neoplasms benign, malignant and unspecified (incl cysts and polyps) |
| Bile duct cancer                  | Bile duct neoplasms malignant                      | Hepatobiliary neoplasms malignant and unspecified                 | Neoplasms benign, malignant and unspecified (incl cysts and polyps) |
| Bile duct cancer recurrent        | Bile duct neoplasms malignant                      | Hepatobiliary neoplasms malignant and unspecified                 | Neoplasms benign, malignant and unspecified (incl cysts and polyps) |

|                                   |                                                           |                                                                      |                                                                     |
|-----------------------------------|-----------------------------------------------------------|----------------------------------------------------------------------|---------------------------------------------------------------------|
| Bile duct squamous cell carcinoma | Bile duct neoplasms malignant                             | Hepatobiliary neoplasms malignant and unspecified                    | Neoplasms benign, malignant and unspecified (incl cysts and polyps) |
| Biliary neoplasm                  | Hepatobiliary neoplasms malignancy unspecified            | Hepatobiliary neoplasms malignant and unspecified                    | Neoplasms benign, malignant and unspecified (incl cysts and polyps) |
| Biopsy abdominal wall abnormal    | Musculoskeletal and soft tissue histopathology procedures | Musculoskeletal and soft tissue investigations (excl enzyme tests)   | Investigations                                                      |
| Biopsy adrenal gland abnormal     | Adrenal gland histopathology procedures                   | Endocrine investigations (incl sex hormones)                         | Investigations                                                      |
| Biopsy anus abnormal              | Gastrointestinal histopathology procedures                | Gastrointestinal investigations                                      | Investigations                                                      |
| Biopsy bladder abnormal           | Urinary tract histopathology procedures                   | Renal and urinary tract investigations and urinalyses                | Investigations                                                      |
| Biopsy bone abnormal              | Musculoskeletal and soft tissue histopathology procedures | Musculoskeletal and soft tissue investigations (excl enzyme tests)   | Investigations                                                      |
| Biopsy bone marrow abnormal       | Bone marrow and immune tissue histopathology procedures   | Haematology investigations (incl blood groups)                       | Investigations                                                      |
| Biopsy brain abnormal             | Central nervous system histopathology procedures          | Neurological, special senses and psychiatric investigations          | Investigations                                                      |
| Biopsy breast abnormal            | Reproductive organ and breast histopathology procedures   | Reproductive organ and breast investigations (excl hormone analyses) | Investigations                                                      |
| Biopsy bronchus abnormal          | Respiratory tract and thoracic histopathology procedures  | Respiratory and pulmonary investigations (excl blood gases)          | Investigations                                                      |
| Biopsy cartilage abnormal         | Musculoskeletal and soft tissue histopathology procedures | Musculoskeletal and soft tissue investigations (excl enzyme tests)   | Investigations                                                      |
| Biopsy cervix abnormal            | Reproductive organ and breast histopathology procedures   | Reproductive organ and breast investigations (excl hormone analyses) | Investigations                                                      |
| Biopsy colon abnormal             | Gastrointestinal histopathology procedures                | Gastrointestinal investigations                                      | Investigations                                                      |
| Biopsy conjunctiva abnormal       | Ophthalmic histopathology and imaging procedures          | Neurological, special senses and psychiatric investigations          | Investigations                                                      |

|                             |                                                           |                                                                      |                |
|-----------------------------|-----------------------------------------------------------|----------------------------------------------------------------------|----------------|
| Biopsy cornea abnormal      | Ophthalmic histopathology and imaging procedures          | Neurological, special senses and psychiatric investigations          | Investigations |
| Biopsy endometrium abnormal | Reproductive organ and breast histopathology procedures   | Reproductive organ and breast investigations (excl hormone analyses) | Investigations |
| Biopsy epididymis abnormal  | Reproductive organ and breast histopathology procedures   | Reproductive organ and breast investigations (excl hormone analyses) | Investigations |
| Biopsy heart abnormal       | Cardiac histopathology procedures                         | Cardiac and vascular investigations (excl enzyme tests)              | Investigations |
| Biopsy kidney abnormal      | Urinary tract histopathology procedures                   | Renal and urinary tract investigations and urinalyses                | Investigations |
| Biopsy larynx abnormal      | Respiratory tract and thoracic histopathology procedures  | Respiratory and pulmonary investigations (excl blood gases)          | Investigations |
| Biopsy lip abnormal         | Gastrointestinal histopathology procedures                | Gastrointestinal investigations                                      | Investigations |
| Biopsy liver abnormal       | Hepatobiliary histopathology procedures                   | Hepatobiliary investigations                                         | Investigations |
| Biopsy lung abnormal        | Respiratory tract and thoracic histopathology procedures  | Respiratory and pulmonary investigations (excl blood gases)          | Investigations |
| Biopsy lymph gland abnormal | Bone marrow and immune tissue histopathology procedures   | Haematology investigations (incl blood groups)                       | Investigations |
| Biopsy mucosa abnormal      | Histopathology procedures NEC                             | Investigations, imaging and histopathology procedures NEC            | Investigations |
| Biopsy muscle abnormal      | Musculoskeletal and soft tissue histopathology procedures | Musculoskeletal and soft tissue investigations (excl enzyme tests)   | Investigations |
| Biopsy oesophagus abnormal  | Gastrointestinal histopathology procedures                | Gastrointestinal investigations                                      | Investigations |
| Biopsy ovary abnormal       | Reproductive organ and breast histopathology procedures   | Reproductive organ and breast investigations (excl hormone analyses) | Investigations |
| Biopsy palate abnormal      | Gastrointestinal histopathology procedures                | Gastrointestinal investigations                                      | Investigations |

|                                   |                                                          |                                                                      |                |
|-----------------------------------|----------------------------------------------------------|----------------------------------------------------------------------|----------------|
| Biopsy parathyroid gland abnormal | Parathyroid histopathology procedures                    | Endocrine investigations (incl sex hormones)                         | Investigations |
| Biopsy penis abnormal             | Reproductive organ and breast histopathology procedures  | Reproductive organ and breast investigations (excl hormone analyses) | Investigations |
| Biopsy pericardium abnormal       | Cardiac histopathology procedures                        | Cardiac and vascular investigations (excl enzyme tests)              | Investigations |
| Biopsy peripheral nerve abnormal  | Peripheral nervous system histopathology procedures      | Neurological, special senses and psychiatric investigations          | Investigations |
| Biopsy peritoneum abnormal        | Gastrointestinal histopathology procedures               | Gastrointestinal investigations                                      | Investigations |
| Biopsy pharynx abnormal           | Respiratory tract and thoracic histopathology procedures | Respiratory and pulmonary investigations (excl blood gases)          | Investigations |
| Biopsy pleura abnormal            | Respiratory tract and thoracic histopathology procedures | Respiratory and pulmonary investigations (excl blood gases)          | Investigations |
| Biopsy rectum abnormal            | Gastrointestinal histopathology procedures               | Gastrointestinal investigations                                      | Investigations |
| Biopsy retina abnormal            | Ophthalmic histopathology and imaging procedures         | Neurological, special senses and psychiatric investigations          | Investigations |
| Biopsy salivary gland abnormal    | Gastrointestinal histopathology procedures               | Gastrointestinal investigations                                      | Investigations |
| Biopsy sclera abnormal            | Ophthalmic histopathology and imaging procedures         | Neurological, special senses and psychiatric investigations          | Investigations |
| Biopsy site unspecified abnormal  | Histopathology procedures NEC                            | Investigations, imaging and histopathology procedures NEC            | Investigations |
| Biopsy skin abnormal              | Skin histopathology procedures                           | Skin investigations                                                  | Investigations |
| Biopsy spinal cord abnormal       | Central nervous system histopathology procedures         | Neurological, special senses and psychiatric investigations          | Investigations |
| Biopsy stomach abnormal           | Gastrointestinal histopathology procedures               | Gastrointestinal investigations                                      | Investigations |
| Biopsy testes abnormal            | Reproductive organ and breast histopathology procedures  | Reproductive organ and breast investigations (excl hormone analyses) | Investigations |



|                                          |                                                          |                                                                      |                                                                     |
|------------------------------------------|----------------------------------------------------------|----------------------------------------------------------------------|---------------------------------------------------------------------|
| Biopsy thymus gland abnormal             | Bone marrow and immune tissue histopathology procedures  | Haematology investigations (incl blood groups)                       | Investigations                                                      |
| Biopsy thyroid gland abnormal            | Thyroid histopathology procedures                        | Endocrine investigations (incl sex hormones)                         | Investigations                                                      |
| Biopsy tongue abnormal                   | Gastrointestinal histopathology procedures               | Gastrointestinal investigations                                      | Investigations                                                      |
| Biopsy trachea abnormal                  | Respiratory tract and thoracic histopathology procedures | Respiratory and pulmonary investigations (excl blood gases)          | Investigations                                                      |
| Biopsy urethra abnormal                  | Urinary tract histopathology procedures                  | Renal and urinary tract investigations and urinalyses                | Investigations                                                      |
| Biopsy vagina abnormal                   | Reproductive organ and breast histopathology procedures  | Reproductive organ and breast investigations (excl hormone analyses) | Investigations                                                      |
| Biopsy vulva abnormal                    | Reproductive organ and breast histopathology procedures  | Reproductive organ and breast investigations (excl hormone analyses) | Investigations                                                      |
| Bladder adenocarcinoma recurrent         | Bladder neoplasms malignant                              | Renal and urinary tract neoplasms malignant and unspecified          | Neoplasms benign, malignant and unspecified (incl cysts and polyps) |
| Bladder adenocarcinoma stage 0           | Bladder neoplasms malignant                              | Renal and urinary tract neoplasms malignant and unspecified          | Neoplasms benign, malignant and unspecified (incl cysts and polyps) |
| Bladder adenocarcinoma stage I           | Bladder neoplasms malignant                              | Renal and urinary tract neoplasms malignant and unspecified          | Neoplasms benign, malignant and unspecified (incl cysts and polyps) |
| Bladder adenocarcinoma stage II          | Bladder neoplasms malignant                              | Renal and urinary tract neoplasms malignant and unspecified          | Neoplasms benign, malignant and unspecified (incl cysts and polyps) |
| Bladder adenocarcinoma stage III         | Bladder neoplasms malignant                              | Renal and urinary tract neoplasms malignant and unspecified          | Neoplasms benign, malignant and unspecified (incl cysts and polyps) |
| Bladder adenocarcinoma stage IV          | Bladder neoplasms malignant                              | Renal and urinary tract neoplasms malignant and unspecified          | Neoplasms benign, malignant and unspecified (incl cysts and polyps) |
| Bladder adenocarcinoma stage unspecified | Bladder neoplasms malignant                              | Renal and urinary tract neoplasms malignant and unspecified          | Neoplasms benign, malignant and unspecified (incl cysts and polyps) |
| Bladder cancer                           | Bladder neoplasms malignant                              | Renal and urinary tract neoplasms malignant                          | Neoplasms benign, malignant and                                     |

|                                                |                                                    |                                                             |                                                                     |
|------------------------------------------------|----------------------------------------------------|-------------------------------------------------------------|---------------------------------------------------------------------|
|                                                |                                                    | and unspecified                                             | unspecified (incl cysts and polyps)                                 |
| Bladder cancer recurrent                       | Bladder neoplasms malignant                        | Renal and urinary tract neoplasms malignant and unspecified | Neoplasms benign, malignant and unspecified (incl cysts and polyps) |
| Bladder cancer stage 0, with cancer in situ    | Bladder neoplasms malignant                        | Renal and urinary tract neoplasms malignant and unspecified | Neoplasms benign, malignant and unspecified (incl cysts and polyps) |
| Bladder cancer stage 0, without cancer in situ | Bladder neoplasms malignant                        | Renal and urinary tract neoplasms malignant and unspecified | Neoplasms benign, malignant and unspecified (incl cysts and polyps) |
| Bladder cancer stage I, with cancer in situ    | Bladder neoplasms malignant                        | Renal and urinary tract neoplasms malignant and unspecified | Neoplasms benign, malignant and unspecified (incl cysts and polyps) |
| Bladder cancer stage I, without cancer in situ | Bladder neoplasms malignant                        | Renal and urinary tract neoplasms malignant and unspecified | Neoplasms benign, malignant and unspecified (incl cysts and polyps) |
| Bladder cancer stage II                        | Bladder neoplasms malignant                        | Renal and urinary tract neoplasms malignant and unspecified | Neoplasms benign, malignant and unspecified (incl cysts and polyps) |
| Bladder cancer stage III                       | Bladder neoplasms malignant                        | Renal and urinary tract neoplasms malignant and unspecified | Neoplasms benign, malignant and unspecified (incl cysts and polyps) |
| Bladder cancer stage IV                        | Bladder neoplasms malignant                        | Renal and urinary tract neoplasms malignant and unspecified | Neoplasms benign, malignant and unspecified (incl cysts and polyps) |
| Bladder neck resection                         | Bladder therapeutic procedures                     | Renal and urinary tract therapeutic procedures              | Surgical and medical procedures                                     |
| Bladder neoplasm                               | Urinary tract neoplasms unspecified malignancy NEC | Renal and urinary tract neoplasms malignant and unspecified | Neoplasms benign, malignant and unspecified (incl cysts and polyps) |
| Bladder papilloma                              | Urinary tract neoplasms benign                     | Renal and urinary tract neoplasms benign                    | Neoplasms benign, malignant and unspecified (incl cysts and polyps) |
| Bladder squamous cell carcinoma recurrent      | Bladder neoplasms malignant                        | Renal and urinary tract neoplasms malignant and unspecified | Neoplasms benign, malignant and unspecified (incl cysts and polyps) |
| Bladder squamous cell carcinoma stage 0        | Bladder neoplasms malignant                        | Renal and urinary tract neoplasms malignant and unspecified | Neoplasms benign, malignant and unspecified (incl cysts and polyps) |
| Bladder squamous cell carcinoma stage I        | Bladder neoplasms malignant                        | Renal and urinary tract neoplasms malignant                 | Neoplasms benign, malignant and                                     |

|                                                   |                                                      |                                                             |                                                                     |
|---------------------------------------------------|------------------------------------------------------|-------------------------------------------------------------|---------------------------------------------------------------------|
|                                                   |                                                      | and unspecified                                             | unspecified (incl cysts and polyps)                                 |
| Bladder squamous cell carcinoma stage II          | Bladder neoplasms malignant                          | Renal and urinary tract neoplasms malignant and unspecified | Neoplasms benign, malignant and unspecified (incl cysts and polyps) |
| Bladder squamous cell carcinoma stage III         | Bladder neoplasms malignant                          | Renal and urinary tract neoplasms malignant and unspecified | Neoplasms benign, malignant and unspecified (incl cysts and polyps) |
| Bladder squamous cell carcinoma stage IV          | Bladder neoplasms malignant                          | Renal and urinary tract neoplasms malignant and unspecified | Neoplasms benign, malignant and unspecified (incl cysts and polyps) |
| Bladder squamous cell carcinoma stage unspecified | Bladder neoplasms malignant                          | Renal and urinary tract neoplasms malignant and unspecified | Neoplasms benign, malignant and unspecified (incl cysts and polyps) |
| Bladder transitional cell carcinoma               | Bladder neoplasms malignant                          | Renal and urinary tract neoplasms malignant and unspecified | Neoplasms benign, malignant and unspecified (incl cysts and polyps) |
| Blast cell proliferation                          | Myeloproliferative disorders (excl leukaemias)       | Haematopoietic neoplasms (excl leukaemias and lymphomas)    | Neoplasms benign, malignant and unspecified (incl cysts and polyps) |
| Bone cancer                                       | Bone neoplasms malignant (excl sarcomas)             | Skeletal neoplasms malignant and unspecified                | Neoplasms benign, malignant and unspecified (incl cysts and polyps) |
| Bone cyst                                         | Bone disorders NEC                                   | Bone disorders (excl congenital and fractures)              | Musculoskeletal and connective tissue disorders                     |
| Bone giant cell tumour                            | Bone neoplasms unspecified malignancy                | Skeletal neoplasms malignant and unspecified                | Neoplasms benign, malignant and unspecified (incl cysts and polyps) |
| Bone giant cell tumour benign                     | Bone neoplasms benign (excl cysts)                   | Skeletal neoplasms benign                                   | Neoplasms benign, malignant and unspecified (incl cysts and polyps) |
| Bone neoplasm                                     | Bone neoplasms unspecified malignancy                | Skeletal neoplasms malignant and unspecified                | Neoplasms benign, malignant and unspecified (incl cysts and polyps) |
| Bone sarcoma                                      | Bone sarcomas                                        | Skeletal neoplasms malignant and unspecified                | Neoplasms benign, malignant and unspecified (incl cysts and polyps) |
| Borderline ovarian tumour                         | Female reproductive neoplasms unspecified malignancy | Reproductive neoplasms female malignant and unspecified     | Neoplasms benign, malignant and unspecified (incl cysts and polyps) |

|                          |                                                                                  |                                                            |                                                                     |
|--------------------------|----------------------------------------------------------------------------------|------------------------------------------------------------|---------------------------------------------------------------------|
| Bowen's disease          | Skin neoplasms malignant and unspecified (excl melanoma)                         | Skin neoplasms malignant and unspecified                   | Neoplasms benign, malignant and unspecified (incl cysts and polyps) |
| Bowenoid papulosis       | Skin neoplasms benign                                                            | Cutaneous neoplasms benign                                 | Neoplasms benign, malignant and unspecified (incl cysts and polyps) |
| Brain neoplasm benign    | Nervous system neoplasms benign NEC                                              | Nervous system neoplasms benign                            | Neoplasms benign, malignant and unspecified (incl cysts and polyps) |
| Brain neoplasm malignant | Central nervous system neoplasms malignant NEC                                   | Nervous system neoplasms malignant and unspecified NEC     | Neoplasms benign, malignant and unspecified (incl cysts and polyps) |
| Brain stem glioma        | Glial tumours malignant                                                          | Nervous system neoplasms malignant and unspecified NEC     | Neoplasms benign, malignant and unspecified (incl cysts and polyps) |
| Brain stem glioma benign | Gliomas benign                                                                   | Nervous system neoplasms benign                            | Neoplasms benign, malignant and unspecified (incl cysts and polyps) |
| Branchial cyst           | Musculoskeletal and connective tissue disorders of face, neck and jaw congenital | Musculoskeletal and connective tissue disorders congenital | Congenital, familial and genetic disorders                          |
| Breast cancer            | Breast and nipple neoplasms malignant                                            | Breast neoplasms malignant and unspecified (incl nipple)   | Neoplasms benign, malignant and unspecified (incl cysts and polyps) |
| Breast cancer in situ    | Breast and nipple neoplasms malignant                                            | Breast neoplasms malignant and unspecified (incl nipple)   | Neoplasms benign, malignant and unspecified (incl cysts and polyps) |
| Breast cancer recurrent  | Breast and nipple neoplasms malignant                                            | Breast neoplasms malignant and unspecified (incl nipple)   | Neoplasms benign, malignant and unspecified (incl cysts and polyps) |
| Breast cancer stage I    | Breast and nipple neoplasms malignant                                            | Breast neoplasms malignant and unspecified (incl nipple)   | Neoplasms benign, malignant and unspecified (incl cysts and polyps) |
| Breast cancer stage II   | Breast and nipple neoplasms malignant                                            | Breast neoplasms malignant and unspecified (incl nipple)   | Neoplasms benign, malignant and unspecified (incl cysts and polyps) |
| Breast cancer stage III  | Breast and nipple neoplasms malignant                                            | Breast neoplasms malignant and unspecified (incl nipple)   | Neoplasms benign, malignant and unspecified (incl cysts and polyps) |
| Breast cancer stage IV   | Breast and nipple neoplasms malignant                                            | Breast neoplasms malignant and unspecified (incl nipple)   | Neoplasms benign, malignant and unspecified (incl cysts and polyps) |

|                                    |                                                                             |                                                                 |                                                                     |
|------------------------------------|-----------------------------------------------------------------------------|-----------------------------------------------------------------|---------------------------------------------------------------------|
| Breast cyst                        | Benign and malignant breast neoplasms                                       | Breast disorders                                                | Reproductive system and breast disorders                            |
| Breast dysplasia                   | Breast disorders NEC                                                        | Breast disorders                                                | Reproductive system and breast disorders                            |
| Breast neoplasm                    | Breast neoplasms unspecified malignancy                                     | Breast neoplasms malignant and unspecified (incl nipple)        | Neoplasms benign, malignant and unspecified (incl cysts and polyps) |
| Breast prosthesis implantation     | Breast therapeutic procedures NEC                                           | Breast therapeutic procedures                                   | Surgical and medical procedures                                     |
| Breast reconstruction              | Breast therapeutic procedures NEC                                           | Breast therapeutic procedures                                   | Surgical and medical procedures                                     |
| Bronchial carcinoma                | Respiratory tract and pleural neoplasms malignant cell type unspecified NEC | Respiratory and mediastinal neoplasms malignant and unspecified | Neoplasms benign, malignant and unspecified (incl cysts and polyps) |
| Burkitt's lymphoma                 | Burkitt's lymphomas                                                         | Lymphomas non-Hodgkin's B-cell                                  | Neoplasms benign, malignant and unspecified (incl cysts and polyps) |
| Burkitt's lymphoma recurrent       | Burkitt's lymphomas                                                         | Lymphomas non-Hodgkin's B-cell                                  | Neoplasms benign, malignant and unspecified (incl cysts and polyps) |
| Burkitt's lymphoma refractory      | Burkitt's lymphomas                                                         | Lymphomas non-Hodgkin's B-cell                                  | Neoplasms benign, malignant and unspecified (incl cysts and polyps) |
| Burkitt's lymphoma stage I         | Burkitt's lymphomas                                                         | Lymphomas non-Hodgkin's B-cell                                  | Neoplasms benign, malignant and unspecified (incl cysts and polyps) |
| Burkitt's lymphoma stage II        | Burkitt's lymphomas                                                         | Lymphomas non-Hodgkin's B-cell                                  | Neoplasms benign, malignant and unspecified (incl cysts and polyps) |
| Burkitt's lymphoma stage III       | Burkitt's lymphomas                                                         | Lymphomas non-Hodgkin's B-cell                                  | Neoplasms benign, malignant and unspecified (incl cysts and polyps) |
| Burkitt's lymphoma stage IV        | Burkitt's lymphomas                                                         | Lymphomas non-Hodgkin's B-cell                                  | Neoplasms benign, malignant and unspecified (incl cysts and polyps) |
| Cachexia                           | General nutritional disorders NEC                                           | Appetite and general nutritional disorders                      | Metabolism and nutrition disorders                                  |
| Carcinoembryonic antigen increased | Cell marker analyses                                                        | Cytogenetic investigations                                      | Investigations                                                      |
| Carcinogenic effect in offspring   | Congenital disorders NEC                                                    | Congenital and hereditary disorders NEC                         | Congenital, familial and genetic disorders                          |

|                                                |                                                                             |                                                                 |                                                                     |
|------------------------------------------------|-----------------------------------------------------------------------------|-----------------------------------------------------------------|---------------------------------------------------------------------|
| Carcinogenicity                                | Poisoning and toxicity                                                      | Exposures, chemical injuries and poisoning                      | Injury, poisoning and procedural complications                      |
| Carcinoid syndrome                             | Ectopic endocrine disorders                                                 | Neoplastic and ectopic endocrinopathies                         | Endocrine disorders                                                 |
| Carcinoid tumour                               | Carcinoid tumours                                                           | Endocrine neoplasms malignant and unspecified                   | Neoplasms benign, malignant and unspecified (incl cysts and polyps) |
| Carcinoid tumour of the appendix               | Carcinoid tumours                                                           | Endocrine neoplasms malignant and unspecified                   | Neoplasms benign, malignant and unspecified (incl cysts and polyps) |
| Carcinoid tumour of the caecum                 | Carcinoid tumours                                                           | Endocrine neoplasms malignant and unspecified                   | Neoplasms benign, malignant and unspecified (incl cysts and polyps) |
| Carcinoid tumour of the gastrointestinal tract | Carcinoid tumours                                                           | Endocrine neoplasms malignant and unspecified                   | Neoplasms benign, malignant and unspecified (incl cysts and polyps) |
| Carcinoid tumour of the prostate               | Carcinoid tumours                                                           | Endocrine neoplasms malignant and unspecified                   | Neoplasms benign, malignant and unspecified (incl cysts and polyps) |
| Carcinoid tumour of the stomach                | Carcinoid tumours                                                           | Endocrine neoplasms malignant and unspecified                   | Neoplasms benign, malignant and unspecified (incl cysts and polyps) |
| Carcinoid tumour pulmonary                     | Carcinoid tumours                                                           | Endocrine neoplasms malignant and unspecified                   | Neoplasms benign, malignant and unspecified (incl cysts and polyps) |
| Carcinoma in situ of eye                       | Ocular neoplasms malignant (excl melanomas)                                 | Ocular neoplasms                                                | Neoplasms benign, malignant and unspecified (incl cysts and polyps) |
| Carcinoma in situ of penis                     | Penile neoplasms malignant                                                  | Reproductive neoplasms male malignant and unspecified           | Neoplasms benign, malignant and unspecified (incl cysts and polyps) |
| Carcinoma in situ of skin                      | Skin neoplasms malignant and unspecified (excl melanoma)                    | Skin neoplasms malignant and unspecified                        | Neoplasms benign, malignant and unspecified (incl cysts and polyps) |
| Carcinoma in situ of trachea                   | Respiratory tract and pleural neoplasms malignant cell type unspecified NEC | Respiratory and mediastinal neoplasms malignant and unspecified | Neoplasms benign, malignant and unspecified (incl cysts and polyps) |
| Carotid body tumour                            | Nervous system neoplasms unspecified malignancy NEC                         | Nervous system neoplasms malignant and unspecified NEC          | Neoplasms benign, malignant and unspecified (incl cysts and polyps) |

|                                       |                                                      |                                                         |                                                                     |
|---------------------------------------|------------------------------------------------------|---------------------------------------------------------|---------------------------------------------------------------------|
| Central nervous system dermoid tumour | Congenital disorders NEC                             | Congenital and hereditary disorders NEC                 | Congenital, familial and genetic disorders                          |
| Central nervous system lymphoma       | Lymphomas unspecified NEC                            | Lymphomas NEC                                           | Neoplasms benign, malignant and unspecified (incl cysts and polyps) |
| Central nervous system neoplasm       | Nervous system neoplasms unspecified malignancy NEC  | Nervous system neoplasms malignant and unspecified NEC  | Neoplasms benign, malignant and unspecified (incl cysts and polyps) |
| Cervical cyst                         | Cervix neoplasms                                     | Cervix disorders (excl infections and inflammations)    | Reproductive system and breast disorders                            |
| Cervical dysplasia                    | Cervix disorders NEC                                 | Cervix disorders (excl infections and inflammations)    | Reproductive system and breast disorders                            |
| Cervical polyp                        | Cervix neoplasms                                     | Cervix disorders (excl infections and inflammations)    | Reproductive system and breast disorders                            |
| Cervix adenomatous polyp              | Cervix neoplasms                                     | Cervix disorders (excl infections and inflammations)    | Reproductive system and breast disorders                            |
| Cervix carcinoma                      | Cervix neoplasms malignant                           | Reproductive neoplasms female malignant and unspecified | Neoplasms benign, malignant and unspecified (incl cysts and polyps) |
| Cervix carcinoma recurrent            | Cervix neoplasms malignant                           | Reproductive neoplasms female malignant and unspecified | Neoplasms benign, malignant and unspecified (incl cysts and polyps) |
| Cervix carcinoma stage I              | Cervix neoplasms malignant                           | Reproductive neoplasms female malignant and unspecified | Neoplasms benign, malignant and unspecified (incl cysts and polyps) |
| Cervix carcinoma stage II             | Cervix neoplasms malignant                           | Reproductive neoplasms female malignant and unspecified | Neoplasms benign, malignant and unspecified (incl cysts and polyps) |
| Cervix carcinoma stage III            | Cervix neoplasms malignant                           | Reproductive neoplasms female malignant and unspecified | Neoplasms benign, malignant and unspecified (incl cysts and polyps) |
| Cervix carcinoma stage IV             | Cervix neoplasms malignant                           | Reproductive neoplasms female malignant and unspecified | Neoplasms benign, malignant and unspecified (incl cysts and polyps) |
| Cervix neoplasm                       | Female reproductive neoplasms unspecified malignancy | Reproductive neoplasms female malignant and unspecified | Neoplasms benign, malignant and unspecified (incl cysts and polyps) |

|                                              |                                        |                                                        |                                                                        |
|----------------------------------------------|----------------------------------------|--------------------------------------------------------|------------------------------------------------------------------------|
| Chemotherapy cardiotoxicity attenuation      | Chemotherapies                         | Therapeutic procedures and supportive care<br>NEC      | Surgical and medical procedures                                        |
| Chemotherapy multiple agents systemic        | Chemotherapies                         | Therapeutic procedures and supportive care<br>NEC      | Surgical and medical procedures                                        |
| Chemotherapy neurotoxicity attenuation       | Chemotherapies                         | Therapeutic procedures and supportive care<br>NEC      | Surgical and medical procedures                                        |
| Chemotherapy single agent systemic           | Chemotherapies                         | Therapeutic procedures and supportive care<br>NEC      | Surgical and medical procedures                                        |
| Chemotherapy urothelial toxicity attenuation | Chemotherapies                         | Therapeutic procedures and supportive care<br>NEC      | Surgical and medical procedures                                        |
| Chloroma                                     | Leukaemias myeloid NEC                 | Leukaemias                                             | Neoplasms benign, malignant and<br>unspecified (incl cysts and polyps) |
| Chloroma (in remission)                      | Leukaemias myeloid NEC                 | Leukaemias                                             | Neoplasms benign, malignant and<br>unspecified (incl cysts and polyps) |
| Cholangioadenoma                             | Hepatobiliary neoplasms benign         | Hepatic and biliary neoplasms benign                   | Neoplasms benign, malignant and<br>unspecified (incl cysts and polyps) |
| Cholangiocarcinoma                           | Bile duct neoplasms malignant          | Hepatobiliary neoplasms malignant and<br>unspecified   | Neoplasms benign, malignant and<br>unspecified (incl cysts and polyps) |
| Choledochal cyst                             | Hepatobiliary abnormalities congenital | Hepatobiliary disorders congenital                     | Congenital, familial and genetic disorders                             |
| Cholesteatoma                                | Aural neoplasms benign                 | Miscellaneous and site unspecified neoplasms<br>benign | Neoplasms benign, malignant and<br>unspecified (incl cysts and polyps) |
| Cholesterin granuloma of middle ear          | Aural neoplasms benign                 | Miscellaneous and site unspecified neoplasms<br>benign | Neoplasms benign, malignant and<br>unspecified (incl cysts and polyps) |
| Cholesterol granuloma                        | Aural neoplasms benign                 | Miscellaneous and site unspecified neoplasms<br>benign | Neoplasms benign, malignant and<br>unspecified (incl cysts and polyps) |
| Chondroblastoma                              | Cartilage neoplasms benign             | Skeletal neoplasms benign                              | Neoplasms benign, malignant and<br>unspecified (incl cysts and polyps) |



|                                              |                                                 |                                                                        |                                                                     |
|----------------------------------------------|-------------------------------------------------|------------------------------------------------------------------------|---------------------------------------------------------------------|
| Chondroma                                    | Cartilage neoplasms benign                      | Skeletal neoplasms benign                                              | Neoplasms benign, malignant and unspecified (incl cysts and polyps) |
| Chondrosarcoma                               | Cartilage sarcomas                              | Skeletal neoplasms malignant and unspecified                           | Neoplasms benign, malignant and unspecified (incl cysts and polyps) |
| Chondrosarcoma metastatic                    | Cartilage sarcomas                              | Skeletal neoplasms malignant and unspecified                           | Neoplasms benign, malignant and unspecified (incl cysts and polyps) |
| Chondrosarcoma recurrent                     | Cartilage sarcomas                              | Skeletal neoplasms malignant and unspecified                           | Neoplasms benign, malignant and unspecified (incl cysts and polyps) |
| Chordoma                                     | Bone neoplasms unspecified malignancy           | Skeletal neoplasms malignant and unspecified                           | Neoplasms benign, malignant and unspecified (incl cysts and polyps) |
| Choriocarcinoma                              | Germ cell neoplasms site unspecified NEC        | Miscellaneous and site unspecified neoplasms malignant and unspecified | Neoplasms benign, malignant and unspecified (incl cysts and polyps) |
| Choroid melanoma                             | Ocular melanomas                                | Ocular neoplasms                                                       | Neoplasms benign, malignant and unspecified (incl cysts and polyps) |
| Choroid plexus papilloma                     | Nervous system neoplasms benign NEC             | Nervous system neoplasms benign                                        | Neoplasms benign, malignant and unspecified (incl cysts and polyps) |
| Choroid tumour excision                      | Choroid and conjunctival therapeutic procedures | Eye therapeutic procedures                                             | Surgical and medical procedures                                     |
| Chronic leukaemia                            | Leukaemias chronic NEC                          | Leukaemias                                                             | Neoplasms benign, malignant and unspecified (incl cysts and polyps) |
| Chronic lymphocytic leukaemia                | Leukaemias chronic lymphocytic                  | Leukaemias                                                             | Neoplasms benign, malignant and unspecified (incl cysts and polyps) |
| Chronic lymphocytic leukaemia (in remission) | Leukaemias chronic lymphocytic                  | Leukaemias                                                             | Neoplasms benign, malignant and unspecified (incl cysts and polyps) |
| Chronic lymphocytic leukaemia recurrent      | Leukaemias chronic lymphocytic                  | Leukaemias                                                             | Neoplasms benign, malignant and unspecified (incl cysts and polyps) |
| Chronic lymphocytic leukaemia refractory     | Leukaemias chronic lymphocytic                  | Leukaemias                                                             | Neoplasms benign, malignant and unspecified (incl cysts and polyps) |

|                                                 |                                        |                                                             |                                                                     |
|-------------------------------------------------|----------------------------------------|-------------------------------------------------------------|---------------------------------------------------------------------|
| Chronic lymphocytic leukaemia stage 0           | Leukaemias chronic lymphocytic         | Leukaemias                                                  | Neoplasms benign, malignant and unspecified (incl cysts and polyps) |
| Chronic lymphocytic leukaemia stage 1           | Leukaemias chronic lymphocytic         | Leukaemias                                                  | Neoplasms benign, malignant and unspecified (incl cysts and polyps) |
| Chronic lymphocytic leukaemia stage 2           | Leukaemias chronic lymphocytic         | Leukaemias                                                  | Neoplasms benign, malignant and unspecified (incl cysts and polyps) |
| Chronic lymphocytic leukaemia stage 3           | Leukaemias chronic lymphocytic         | Leukaemias                                                  | Neoplasms benign, malignant and unspecified (incl cysts and polyps) |
| Chronic lymphocytic leukaemia stage 4           | Leukaemias chronic lymphocytic         | Leukaemias                                                  | Neoplasms benign, malignant and unspecified (incl cysts and polyps) |
| Chronic myeloid leukaemia                       | Leukaemias chronic myeloid             | Leukaemias                                                  | Neoplasms benign, malignant and unspecified (incl cysts and polyps) |
| Chronic myeloid leukaemia (in remission)        | Leukaemias chronic myeloid             | Leukaemias                                                  | Neoplasms benign, malignant and unspecified (incl cysts and polyps) |
| Chronic myelomonocytic leukaemia                | Myelodysplastic syndromes              | Leukaemias                                                  | Neoplasms benign, malignant and unspecified (incl cysts and polyps) |
| Chronic myelomonocytic leukaemia (in remission) | Myelodysplastic syndromes              | Leukaemias                                                  | Neoplasms benign, malignant and unspecified (incl cysts and polyps) |
| Clear cell endometrial carcinoma                | Endometrial neoplasms malignant        | Reproductive neoplasms female malignant and unspecified     | Neoplasms benign, malignant and unspecified (incl cysts and polyps) |
| Clear cell sarcoma of the kidney                | Renal neoplasms malignant              | Renal and urinary tract neoplasms malignant and unspecified | Neoplasms benign, malignant and unspecified (incl cysts and polyps) |
| Colectomy total                                 | Large intestine therapeutic procedures | Gastrointestinal therapeutic procedures                     | Surgical and medical procedures                                     |
| Colon cancer                                    | Colorectal neoplasms malignant         | Gastrointestinal neoplasms malignant and unspecified        | Neoplasms benign, malignant and unspecified (incl cysts and polyps) |
| Colon cancer recurrent                          | Colorectal neoplasms malignant         | Gastrointestinal neoplasms malignant and unspecified        | Neoplasms benign, malignant and unspecified (incl cysts and polyps) |

|                                    |                                        |                                                      |                                                                     |
|------------------------------------|----------------------------------------|------------------------------------------------------|---------------------------------------------------------------------|
| Colon cancer stage I               | Colorectal neoplasms malignant         | Gastrointestinal neoplasms malignant and unspecified | Neoplasms benign, malignant and unspecified (incl cysts and polyps) |
| Colon cancer stage II              | Colorectal neoplasms malignant         | Gastrointestinal neoplasms malignant and unspecified | Neoplasms benign, malignant and unspecified (incl cysts and polyps) |
| Colon cancer stage III             | Colorectal neoplasms malignant         | Gastrointestinal neoplasms malignant and unspecified | Neoplasms benign, malignant and unspecified (incl cysts and polyps) |
| Colon cancer stage IV              | Colorectal neoplasms malignant         | Gastrointestinal neoplasms malignant and unspecified | Neoplasms benign, malignant and unspecified (incl cysts and polyps) |
| Colony stimulating factor therapy  | Cytokine therapies                     | Therapeutic procedures and supportive care NEC       | Surgical and medical procedures                                     |
| Colorectal cancer recurrent        | Colorectal neoplasms malignant         | Gastrointestinal neoplasms malignant and unspecified | Neoplasms benign, malignant and unspecified (incl cysts and polyps) |
| Colorectal cancer stage I          | Colorectal neoplasms malignant         | Gastrointestinal neoplasms malignant and unspecified | Neoplasms benign, malignant and unspecified (incl cysts and polyps) |
| Colorectal cancer stage II         | Colorectal neoplasms malignant         | Gastrointestinal neoplasms malignant and unspecified | Neoplasms benign, malignant and unspecified (incl cysts and polyps) |
| Colorectal cancer stage III        | Colorectal neoplasms malignant         | Gastrointestinal neoplasms malignant and unspecified | Neoplasms benign, malignant and unspecified (incl cysts and polyps) |
| Colorectal cancer stage IV         | Colorectal neoplasms malignant         | Gastrointestinal neoplasms malignant and unspecified | Neoplasms benign, malignant and unspecified (incl cysts and polyps) |
| Colorectal carcinoma stage 0       | Colorectal neoplasms malignant         | Gastrointestinal neoplasms malignant and unspecified | Neoplasms benign, malignant and unspecified (incl cysts and polyps) |
| Congenital cystic disease of liver | Hepatobiliary abnormalities congenital | Hepatobiliary disorders congenital                   | Congenital, familial and genetic disorders                          |
| Congenital cystic kidney disease   | Renal disorders congenital             | Renal and urinary tract disorders congenital         | Congenital, familial and genetic disorders                          |
| Congenital renal cyst              | Renal disorders congenital             | Renal and urinary tract disorders congenital         | Congenital, familial and genetic disorders                          |
| Conjunctival cyst                  | Ocular cysts and polyps                | Ocular neoplasms                                     | Eye disorders                                                       |

|                                          |                                                       |                                                             |                                                                     |
|------------------------------------------|-------------------------------------------------------|-------------------------------------------------------------|---------------------------------------------------------------------|
| Craniopharyngioma                        | Endocrine neoplasms malignant and unspecified NEC     | Endocrine neoplasms malignant and unspecified               | Neoplasms benign, malignant and unspecified (incl cysts and polyps) |
| Craniopharyngioma benign                 | Nervous system neoplasms benign NEC                   | Nervous system neoplasms benign                             | Neoplasms benign, malignant and unspecified (incl cysts and polyps) |
| Crohn's disease                          | Colitis (excl infective)                              | Gastrointestinal inflammatory conditions                    | Gastrointestinal disorders                                          |
| CSF lymphocyte count abnormal            | Cerebrospinal fluid tests (excl microbiology)         | Neurological, special senses and psychiatric investigations | Investigations                                                      |
| CSF lymphocyte count increased           | Cerebrospinal fluid tests (excl microbiology)         | Neurological, special senses and psychiatric investigations | Investigations                                                      |
| Cyclotron therapy                        | Radiotherapies site unspecified                       | Therapeutic procedures and supportive care NEC              | Surgical and medical procedures                                     |
| Cyst                                     | Mass conditions NEC                                   | Tissue disorders NEC                                        | General disorders and administration site conditions                |
| Cystic eyeball, congenital               | Ocular disorders congenital NEC                       | Eye disorders congenital                                    | Congenital, familial and genetic disorders                          |
| Dermal cyst                              | Skin cysts and polyps                                 | Cutaneous neoplasms benign                                  | Skin and subcutaneous tissue disorders                              |
| Dermoid cyst                             | Skin and subcutaneous tissue disorders congenital NEC | Skin and subcutaneous tissue disorders congenital           | Congenital, familial and genetic disorders                          |
| Diffuse large B-cell lymphoma            | Diffuse large B-cell lymphomas                        | Lymphomas non-Hodgkin's B-cell                              | Neoplasms benign, malignant and unspecified (incl cysts and polyps) |
| Diffuse large B-cell lymphoma recurrent  | Diffuse large B-cell lymphomas                        | Lymphomas non-Hodgkin's B-cell                              | Neoplasms benign, malignant and unspecified (incl cysts and polyps) |
| Diffuse large B-cell lymphoma refractory | Diffuse large B-cell lymphomas                        | Lymphomas non-Hodgkin's B-cell                              | Neoplasms benign, malignant and unspecified (incl cysts and polyps) |
| Diffuse large B-cell lymphoma stage I    | Diffuse large B-cell lymphomas                        | Lymphomas non-Hodgkin's B-cell                              | Neoplasms benign, malignant and unspecified (incl cysts and polyps) |
| Diffuse large B-cell lymphoma stage II   | Diffuse large B-cell lymphomas                        | Lymphomas non-Hodgkin's B-cell                              | Neoplasms benign, malignant and unspecified (incl cysts and polyps) |

|                                           |                                                          |                                                           |                                                                     |
|-------------------------------------------|----------------------------------------------------------|-----------------------------------------------------------|---------------------------------------------------------------------|
| Diffuse large B-cell lymphoma stage III   | Diffuse large B-cell lymphomas                           | Lymphomas non-Hodgkin's B-cell                            | Neoplasms benign, malignant and unspecified (incl cysts and polyps) |
| Diffuse large B-cell lymphoma stage IV    | Diffuse large B-cell lymphomas                           | Lymphomas non-Hodgkin's B-cell                            | Neoplasms benign, malignant and unspecified (incl cysts and polyps) |
| Duodenal polyp                            | Benign neoplasms gastrointestinal (excl oral cavity)     | Benign neoplasms gastrointestinal                         | Gastrointestinal disorders                                          |
| Duodenectomy                              | Small intestine therapeutic procedures                   | Gastrointestinal therapeutic procedures                   | Surgical and medical procedures                                     |
| Dysplastic naevus syndrome                | Skin and subcutaneous tissue disorders congenital<br>NEC | Skin and subcutaneous tissue disorders<br>congenital      | Congenital, familial and genetic disorders                          |
| Ectopic ACTH syndrome                     | Ectopic endocrine disorders                              | Neoplastic and ectopic endocrinopathies                   | Endocrine disorders                                                 |
| Ectopic aldosterone secretion             | Ectopic endocrine disorders                              | Neoplastic and ectopic endocrinopathies                   | Endocrine disorders                                                 |
| Ectopic antidiuretic hormone secretion    | Ectopic endocrine disorders                              | Neoplastic and ectopic endocrinopathies                   | Endocrine disorders                                                 |
| Ectopic calcitonin production             | Ectopic endocrine disorders                              | Neoplastic and ectopic endocrinopathies                   | Endocrine disorders                                                 |
| Ectopic chorionic gonadotrophin secretion | Ectopic endocrine disorders                              | Neoplastic and ectopic endocrinopathies                   | Endocrine disorders                                                 |
| Ectopic growth hormone secretion          | Ectopic endocrine disorders                              | Neoplastic and ectopic endocrinopathies                   | Endocrine disorders                                                 |
| Ectopic parathyroid hormone production    | Ectopic endocrine disorders                              | Neoplastic and ectopic endocrinopathies                   | Endocrine disorders                                                 |
| Ectopic prolactin secretion               | Ectopic endocrine disorders                              | Neoplastic and ectopic endocrinopathies                   | Endocrine disorders                                                 |
| Ectopic renin secretion                   | Ectopic endocrine disorders                              | Neoplastic and ectopic endocrinopathies                   | Endocrine disorders                                                 |
| Electron radiation therapy to bladder     | Bladder radiotherapies                                   | Renal and urinary tract therapeutic procedures            | Surgical and medical procedures                                     |
| Electron radiation therapy to bone        | Bone radiotherapies                                      | Bone and joint therapeutic procedures                     | Surgical and medical procedures                                     |
| Electron radiation therapy to brain       | Brain radiotherapies                                     | Nervous system, skull and spine therapeutic<br>procedures | Surgical and medical procedures                                     |
| Electron radiation therapy to breast      | Breast radiotherapies                                    | Breast therapeutic procedures                             | Surgical and medical procedures                                     |

|                                                    |                                                    |                                                                   |                                                                     |
|----------------------------------------------------|----------------------------------------------------|-------------------------------------------------------------------|---------------------------------------------------------------------|
| Electron radiation therapy to colon                | Gastrointestinal radiotherapies                    | Gastrointestinal therapeutic procedures                           | Surgical and medical procedures                                     |
| Electron radiation therapy to ear, nose, or throat | Ear, nose and throat radiotherapies                | Head and neck therapeutic procedures                              | Surgical and medical procedures                                     |
| Electron radiation therapy to lung                 | Pulmonary radiotherapies                           | Respiratory tract therapeutic procedures                          | Surgical and medical procedures                                     |
| Electron radiation therapy to pancreas             | Pancreatic radiotherapies                          | Gastrointestinal therapeutic procedures                           | Surgical and medical procedures                                     |
| Electron radiation therapy to prostate             | Prostatic radiotherapies                           | Male genital tract therapeutic procedures                         | Surgical and medical procedures                                     |
| Electron radiation therapy to skin                 | Skin radiotherapies                                | Skin and subcutaneous tissue therapeutic procedures               | Surgical and medical procedures                                     |
| Electron radiation therapy to uterus               | Uterine radiotherapies                             | Obstetric and gynaecological therapeutic procedures               | Surgical and medical procedures                                     |
| Enchondromatosis                                   | Cartilage neoplasms benign                         | Skeletal neoplasms benign                                         | Neoplasms benign, malignant and unspecified (incl cysts and polyps) |
| Endobronchial lipoma                               | Respiratory tract and pleural neoplasms benign NEC | Respiratory and mediastinal neoplasms benign (excl mesotheliomas) | Neoplasms benign, malignant and unspecified (incl cysts and polyps) |
| Endometrial adenocarcinoma                         | Endometrial neoplasms malignant                    | Reproductive neoplasms female malignant and unspecified           | Neoplasms benign, malignant and unspecified (incl cysts and polyps) |
| Endometrial adenoma                                | Uterine neoplasms benign                           | Reproductive neoplasms female benign                              | Neoplasms benign, malignant and unspecified (incl cysts and polyps) |
| Endometrial cancer                                 | Endometrial neoplasms malignant                    | Reproductive neoplasms female malignant and unspecified           | Neoplasms benign, malignant and unspecified (incl cysts and polyps) |
| Endometrial cancer metastatic                      | Endometrial neoplasms malignant                    | Reproductive neoplasms female malignant and unspecified           | Neoplasms benign, malignant and unspecified (incl cysts and polyps) |
| Endometrial cancer recurrent                       | Endometrial neoplasms malignant                    | Reproductive neoplasms female malignant and unspecified           | Neoplasms benign, malignant and unspecified (incl cysts and polyps) |
| Endometrial cancer stage 0                         | Endometrial neoplasms malignant                    | Reproductive neoplasms female malignant and unspecified           | Neoplasms benign, malignant and unspecified (incl cysts and polyps) |
| Endometrial cancer stage I                         | Endometrial neoplasms malignant                    | Reproductive neoplasms female malignant and                       | Neoplasms benign, malignant and                                     |

|                                |                                                      |                                                         |                                                                     |
|--------------------------------|------------------------------------------------------|---------------------------------------------------------|---------------------------------------------------------------------|
|                                |                                                      | unspecified                                             | unspecified (incl cysts and polyps)                                 |
| Endometrial cancer stage II    | Endometrial neoplasms malignant                      | Reproductive neoplasms female malignant and unspecified | Neoplasms benign, malignant and unspecified (incl cysts and polyps) |
| Endometrial cancer stage III   | Endometrial neoplasms malignant                      | Reproductive neoplasms female malignant and unspecified | Neoplasms benign, malignant and unspecified (incl cysts and polyps) |
| Endometrial cancer stage IV    | Endometrial neoplasms malignant                      | Reproductive neoplasms female malignant and unspecified | Neoplasms benign, malignant and unspecified (incl cysts and polyps) |
| Endometrial hyperplasia        | Uterine disorders NEC                                | Uterine, pelvic and broad ligament disorders            | Reproductive system and breast disorders                            |
| Endometrial neoplasm           | Female reproductive neoplasms unspecified malignancy | Reproductive neoplasms female malignant and unspecified | Neoplasms benign, malignant and unspecified (incl cysts and polyps) |
| Eosinophilic leukaemia         | Leukaemias myeloid NEC                               | Leukaemias                                              | Neoplasms benign, malignant and unspecified (incl cysts and polyps) |
| Ependymoma                     | Nervous system neoplasms unspecified malignancy NEC  | Nervous system neoplasms malignant and unspecified NEC  | Neoplasms benign, malignant and unspecified (incl cysts and polyps) |
| Ependymoma malignant           | Glial tumours malignant                              | Nervous system neoplasms malignant and unspecified NEC  | Neoplasms benign, malignant and unspecified (incl cysts and polyps) |
| Ependymoma benign              | Nervous system neoplasms benign NEC                  | Nervous system neoplasms benign                         | Neoplasms benign, malignant and unspecified (incl cysts and polyps) |
| Epididymal cyst                | Testicular and epididymal neoplasms                  | Testicular and epididymal disorders                     | Reproductive system and breast disorders                            |
| Epithelioid sarcoma            | Epithelioid sarcomas                                 | Soft tissue neoplasms malignant and unspecified         | Neoplasms benign, malignant and unspecified (incl cysts and polyps) |
| Epithelioid sarcoma metastatic | Epithelioid sarcomas                                 | Soft tissue neoplasms malignant and unspecified         | Neoplasms benign, malignant and unspecified (incl cysts and polyps) |
| Epithelioid sarcoma recurrent  | Epithelioid sarcomas                                 | Soft tissue neoplasms malignant and unspecified         | Neoplasms benign, malignant and unspecified (incl cysts and polyps) |
| Epithelioma adenoides cysticum | Skin neoplasms benign                                | Cutaneous neoplasms benign                              | Neoplasms benign, malignant and unspecified (incl cysts and polyps) |

|                                                      |                                                |                                                                        |                                                                     |
|------------------------------------------------------|------------------------------------------------|------------------------------------------------------------------------|---------------------------------------------------------------------|
| Erythraemic myelosis (in remission)                  | Leukaemias acute myeloid                       | Leukaemias                                                             | Neoplasms benign, malignant and unspecified (incl cysts and polyps) |
| Erythroleukaemia                                     | Leukaemias acute myeloid                       | Leukaemias                                                             | Neoplasms benign, malignant and unspecified (incl cysts and polyps) |
| Essential thrombocythaemia                           | Myeloproliferative disorders (excl leukaemias) | Haematopoietic neoplasms (excl leukaemias and lymphomas)               | Neoplasms benign, malignant and unspecified (incl cysts and polyps) |
| Ewing's sarcoma                                      | Bone sarcomas                                  | Skeletal neoplasms malignant and unspecified                           | Neoplasms benign, malignant and unspecified (incl cysts and polyps) |
| Ewing's sarcoma metastatic                           | Bone sarcomas                                  | Skeletal neoplasms malignant and unspecified                           | Neoplasms benign, malignant and unspecified (incl cysts and polyps) |
| Ewing's sarcoma recurrent                            | Bone sarcomas                                  | Skeletal neoplasms malignant and unspecified                           | Neoplasms benign, malignant and unspecified (incl cysts and polyps) |
| Ex vivo gene therapy                                 | Gene therapies                                 | Therapeutic procedures and supportive care<br>NEC                      | Surgical and medical procedures                                     |
| Extended radical mastectomy                          | Mastectomies                                   | Breast therapeutic procedures                                          | Surgical and medical procedures                                     |
| Extra-osseous Ewing's sarcoma                        | Extraskelatal Ewing's sarcomas                 | Soft tissue neoplasms malignant and unspecified                        | Neoplasms benign, malignant and unspecified (incl cysts and polyps) |
| Extra-osseous Ewing's sarcoma metastatic             | Extraskelatal Ewing's sarcomas                 | Soft tissue neoplasms malignant and unspecified                        | Neoplasms benign, malignant and unspecified (incl cysts and polyps) |
| Extra-osseous Ewing's sarcoma recurrent              | Extraskelatal Ewing's sarcomas                 | Soft tissue neoplasms malignant and unspecified                        | Neoplasms benign, malignant and unspecified (incl cysts and polyps) |
| Extragonadal primary embryonal carcinoma             | Extragonadal primary germ cell neoplasms       | Miscellaneous and site unspecified neoplasms malignant and unspecified | Neoplasms benign, malignant and unspecified (incl cysts and polyps) |
| Extragonadal primary germ cell tumour mixed stage I  | Extragonadal primary germ cell neoplasms       | Miscellaneous and site unspecified neoplasms malignant and unspecified | Neoplasms benign, malignant and unspecified (incl cysts and polyps) |
| Extragonadal primary germ cell tumour mixed stage II | Extragonadal primary germ cell neoplasms       | Miscellaneous and site unspecified neoplasms malignant and unspecified | Neoplasms benign, malignant and unspecified (incl cysts and polyps) |



|                                                                 |                                                              |                                                                        |                                                                     |
|-----------------------------------------------------------------|--------------------------------------------------------------|------------------------------------------------------------------------|---------------------------------------------------------------------|
| Extragenadal primary germ cell tumour mixed stage III           | Extragenadal primary germ cell neoplasms                     | Miscellaneous and site unspecified neoplasms malignant and unspecified | Neoplasms benign, malignant and unspecified (incl cysts and polyps) |
| Extragenadal primary non-seminoma stage I                       | Extragenadal primary germ cell neoplasms                     | Miscellaneous and site unspecified neoplasms malignant and unspecified | Neoplasms benign, malignant and unspecified (incl cysts and polyps) |
| Extragenadal primary non-seminoma stage II                      | Extragenadal primary germ cell neoplasms                     | Miscellaneous and site unspecified neoplasms malignant and unspecified | Neoplasms benign, malignant and unspecified (incl cysts and polyps) |
| Extragenadal primary non-seminoma stage III                     | Extragenadal primary germ cell neoplasms                     | Miscellaneous and site unspecified neoplasms malignant and unspecified | Neoplasms benign, malignant and unspecified (incl cysts and polyps) |
| Extragenadal primary non-seminoma stage IV                      | Extragenadal primary germ cell neoplasms                     | Miscellaneous and site unspecified neoplasms malignant and unspecified | Neoplasms benign, malignant and unspecified (incl cysts and polyps) |
| Extragenadal primary seminoma (pure) stage I                    | Extragenadal primary germ cell neoplasms                     | Miscellaneous and site unspecified neoplasms malignant and unspecified | Neoplasms benign, malignant and unspecified (incl cysts and polyps) |
| Extragenadal primary seminoma (pure) stage II                   | Extragenadal primary germ cell neoplasms                     | Miscellaneous and site unspecified neoplasms malignant and unspecified | Neoplasms benign, malignant and unspecified (incl cysts and polyps) |
| Extragenadal primary seminoma (pure) stage III                  | Extragenadal primary germ cell neoplasms                     | Miscellaneous and site unspecified neoplasms malignant and unspecified | Neoplasms benign, malignant and unspecified (incl cysts and polyps) |
| Extragenadal primary seminoma (pure) stage IV                   | Extragenadal primary germ cell neoplasms                     | Miscellaneous and site unspecified neoplasms malignant and unspecified | Neoplasms benign, malignant and unspecified (incl cysts and polyps) |
| Extranodal marginal zone B-cell lymphoma (MALT type) recurrent  | Extranodal marginal zone B-cell lymphomas (low grade B-cell) | Lymphomas non-Hodgkin's B-cell                                         | Neoplasms benign, malignant and unspecified (incl cysts and polyps) |
| Extranodal marginal zone B-cell lymphoma (MALT type) refractory | Extranodal marginal zone B-cell lymphomas (low grade B-cell) | Lymphomas non-Hodgkin's B-cell                                         | Neoplasms benign, malignant and unspecified (incl cysts and polyps) |
| Extranodal marginal zone B-cell lymphoma (MALT type) stage I    | Extranodal marginal zone B-cell lymphomas (low grade B-cell) | Lymphomas non-Hodgkin's B-cell                                         | Neoplasms benign, malignant and unspecified (incl cysts and polyps) |
| Extranodal marginal zone B-cell lymphoma (MALT type) stage II   | Extranodal marginal zone B-cell lymphomas (low grade B-cell) | Lymphomas non-Hodgkin's B-cell                                         | Neoplasms benign, malignant and unspecified (incl cysts and polyps) |
| Extranodal marginal zone B-cell lymphoma (MALT type) stage III  | Extranodal marginal zone B-cell lymphomas (low grade B-cell) | Lymphomas non-Hodgkin's B-cell                                         | Neoplasms benign, malignant and unspecified (incl cysts and polyps) |

|                                                               |                                                              |                                                         |                                                                     |
|---------------------------------------------------------------|--------------------------------------------------------------|---------------------------------------------------------|---------------------------------------------------------------------|
| Extranodal marginal zone B-cell lymphoma (MALT type) stage IV | Extranodal marginal zone B-cell lymphomas (low grade B-cell) | Lymphomas non-Hodgkin's B-cell                          | Neoplasms benign, malignant and unspecified (incl cysts and polyps) |
| Extraocular retinoblastoma                                    | Ocular neoplasms malignant (excl melanomas)                  | Ocular neoplasms                                        | Neoplasms benign, malignant and unspecified (incl cysts and polyps) |
| Extraskelletal chondrosarcoma metastatic                      | Extraskelletal chondrosarcomas                               | Soft tissue neoplasms malignant and unspecified         | Neoplasms benign, malignant and unspecified (incl cysts and polyps) |
| Extraskelletal chondrosarcoma recurrent                       | Extraskelletal chondrosarcomas                               | Soft tissue neoplasms malignant and unspecified         | Neoplasms benign, malignant and unspecified (incl cysts and polyps) |
| Extraskelletal osteosarcoma                                   | Extraskelletal osteosarcomas                                 | Soft tissue neoplasms malignant and unspecified         | Neoplasms benign, malignant and unspecified (incl cysts and polyps) |
| Extraskelletal osteosarcoma metastatic                        | Extraskelletal osteosarcomas                                 | Soft tissue neoplasms malignant and unspecified         | Neoplasms benign, malignant and unspecified (incl cysts and polyps) |
| Extraskelletal osteosarcoma recurrent                         | Extraskelletal osteosarcomas                                 | Soft tissue neoplasms malignant and unspecified         | Neoplasms benign, malignant and unspecified (incl cysts and polyps) |
| Fallopian tube cancer                                         | Fallopian tube neoplasms malignant                           | Reproductive neoplasms female malignant and unspecified | Neoplasms benign, malignant and unspecified (incl cysts and polyps) |
| Fallopian tube cancer metastatic                              | Fallopian tube neoplasms malignant                           | Reproductive neoplasms female malignant and unspecified | Neoplasms benign, malignant and unspecified (incl cysts and polyps) |
| Fallopian tube cancer stage I                                 | Fallopian tube neoplasms malignant                           | Reproductive neoplasms female malignant and unspecified | Neoplasms benign, malignant and unspecified (incl cysts and polyps) |
| Fallopian tube cancer stage II                                | Fallopian tube neoplasms malignant                           | Reproductive neoplasms female malignant and unspecified | Neoplasms benign, malignant and unspecified (incl cysts and polyps) |
| Fallopian tube cancer stage III                               | Fallopian tube neoplasms malignant                           | Reproductive neoplasms female malignant and unspecified | Neoplasms benign, malignant and unspecified (incl cysts and polyps) |
| Fallopian tube cancer stage IV                                | Fallopian tube neoplasms malignant                           | Reproductive neoplasms female malignant and unspecified | Neoplasms benign, malignant and unspecified (incl cysts and polyps) |
| Fibroadenoma of breast                                        | Breast and nipple neoplasms benign                           | Breast neoplasms benign (incl nipple)                   | Neoplasms benign, malignant and unspecified (incl cysts and polyps) |

|                                                                  |                                                            |                                                     |                                                                     |
|------------------------------------------------------------------|------------------------------------------------------------|-----------------------------------------------------|---------------------------------------------------------------------|
| Fibrocystic breast disease                                       | Benign and malignant breast neoplasms                      | Breast disorders                                    | Reproductive system and breast disorders                            |
| Fibroma                                                          | Neoplasms benign site unspecified NEC                      | Miscellaneous and site unspecified neoplasms benign | Neoplasms benign, malignant and unspecified (incl cysts and polyps) |
| Fibrosarcoma                                                     | Fibrosarcomas malignant                                    | Soft tissue neoplasms malignant and unspecified     | Neoplasms benign, malignant and unspecified (incl cysts and polyps) |
| Fibrosarcoma excision                                            | Therapeutic procedures NEC                                 | Therapeutic procedures and supportive care NEC      | Surgical and medical procedures                                     |
| Fibrosarcoma metastatic                                          | Fibrosarcomas malignant                                    | Soft tissue neoplasms malignant and unspecified     | Neoplasms benign, malignant and unspecified (incl cysts and polyps) |
| Follicle centre lymphoma diffuse small cell lymphoma recurrent   | Follicle centre lymphomas diffuse predominantly small cell | Lymphomas non-Hodgkin's B-cell                      | Neoplasms benign, malignant and unspecified (incl cysts and polyps) |
| Follicle centre lymphoma diffuse small cell lymphoma refractory  | Follicle centre lymphomas diffuse predominantly small cell | Lymphomas non-Hodgkin's B-cell                      | Neoplasms benign, malignant and unspecified (incl cysts and polyps) |
| Follicle centre lymphoma diffuse small cell lymphoma stage I     | Follicle centre lymphomas diffuse predominantly small cell | Lymphomas non-Hodgkin's B-cell                      | Neoplasms benign, malignant and unspecified (incl cysts and polyps) |
| Follicle centre lymphoma diffuse small cell lymphoma stage II    | Follicle centre lymphomas diffuse predominantly small cell | Lymphomas non-Hodgkin's B-cell                      | Neoplasms benign, malignant and unspecified (incl cysts and polyps) |
| Follicle centre lymphoma diffuse small cell lymphoma stage III   | Follicle centre lymphomas diffuse predominantly small cell | Lymphomas non-Hodgkin's B-cell                      | Neoplasms benign, malignant and unspecified (incl cysts and polyps) |
| Follicle centre lymphoma diffuse small cell lymphoma stage IV    | Follicle centre lymphomas diffuse predominantly small cell | Lymphomas non-Hodgkin's B-cell                      | Neoplasms benign, malignant and unspecified (incl cysts and polyps) |
| Follicle centre lymphoma, follicular grade I, II, III recurrent  | Follicle centre lymphomas, follicular grade I, II, III     | Lymphomas non-Hodgkin's B-cell                      | Neoplasms benign, malignant and unspecified (incl cysts and polyps) |
| Follicle centre lymphoma, follicular grade I, II, III refractory | Follicle centre lymphomas, follicular grade I, II, III     | Lymphomas non-Hodgkin's B-cell                      | Neoplasms benign, malignant and unspecified (incl cysts and polyps) |
| Follicle centre lymphoma, follicular grade I, II, III stage I    | Follicle centre lymphomas, follicular grade I, II, III     | Lymphomas non-Hodgkin's B-cell                      | Neoplasms benign, malignant and unspecified (incl cysts and polyps) |

|                                                                 |                                                        |                                                        |                                                                     |
|-----------------------------------------------------------------|--------------------------------------------------------|--------------------------------------------------------|---------------------------------------------------------------------|
| Follicle centre lymphoma, follicular grade I, II, III stage II  | Follicle centre lymphomas, follicular grade I, II, III | Lymphomas non-Hodgkin's B-cell                         | Neoplasms benign, malignant and unspecified (incl cysts and polyps) |
| Follicle centre lymphoma, follicular grade I, II, III stage III | Follicle centre lymphomas, follicular grade I, II, III | Lymphomas non-Hodgkin's B-cell                         | Neoplasms benign, malignant and unspecified (incl cysts and polyps) |
| Follicle centre lymphoma, follicular grade I, II, III stage IV  | Follicle centre lymphomas, follicular grade I, II, III | Lymphomas non-Hodgkin's B-cell                         | Neoplasms benign, malignant and unspecified (incl cysts and polyps) |
| Follicular thyroid cancer                                       | Thyroid neoplasms malignant                            | Endocrine neoplasms malignant and unspecified          | Neoplasms benign, malignant and unspecified (incl cysts and polyps) |
| Gallbladder cancer                                              | Gallbladder neoplasms malignant                        | Hepatobiliary neoplasms malignant and unspecified      | Neoplasms benign, malignant and unspecified (incl cysts and polyps) |
| Gallbladder cancer recurrent                                    | Gallbladder neoplasms malignant                        | Hepatobiliary neoplasms malignant and unspecified      | Neoplasms benign, malignant and unspecified (incl cysts and polyps) |
| Gamma interferon therapy                                        | Cytokine therapies                                     | Therapeutic procedures and supportive care NEC         | Surgical and medical procedures                                     |
| Gamma radiation therapy to bladder                              | Bladder radiotherapies                                 | Renal and urinary tract therapeutic procedures         | Surgical and medical procedures                                     |
| Gamma radiation therapy to bone                                 | Bone radiotherapies                                    | Bone and joint therapeutic procedures                  | Surgical and medical procedures                                     |
| Gamma radiation therapy to brain                                | Brain radiotherapies                                   | Nervous system, skull and spine therapeutic procedures | Surgical and medical procedures                                     |
| Gamma radiation therapy to breast                               | Breast radiotherapies                                  | Breast therapeutic procedures                          | Surgical and medical procedures                                     |
| Gamma radiation therapy to colon                                | Gastrointestinal radiotherapies                        | Gastrointestinal therapeutic procedures                | Surgical and medical procedures                                     |
| Gamma radiation therapy to ear, nose, or throat                 | Ear, nose and throat radiotherapies                    | Head and neck therapeutic procedures                   | Surgical and medical procedures                                     |
| Gamma radiation therapy to lung                                 | Pulmonary radiotherapies                               | Respiratory tract therapeutic procedures               | Surgical and medical procedures                                     |
| Gamma radiation therapy to pancreas                             | Pancreatic radiotherapies                              | Gastrointestinal therapeutic procedures                | Surgical and medical procedures                                     |
| Gamma radiation therapy to pleura                               | Pleural radiation therapies                            | Respiratory tract therapeutic procedures               | Surgical and medical procedures                                     |
| Gamma radiation therapy to prostate                             | Prostatic radiotherapies                               | Male genital tract therapeutic procedures              | Surgical and medical procedures                                     |

|                                    |                                                      |                                                        |                                                                     |
|------------------------------------|------------------------------------------------------|--------------------------------------------------------|---------------------------------------------------------------------|
| Gamma radiation therapy to skin    | Skin radiotherapies                                  | Skin and subcutaneous tissue therapeutic procedures    | Surgical and medical procedures                                     |
| Gamma radiation therapy to thyroid | Thyroid radiotherapies                               | Endocrine gland therapeutic procedures                 | Surgical and medical procedures                                     |
| Gamma radiation therapy to uterus  | Uterine radiotherapies                               | Obstetric and gynaecological therapeutic procedures    | Surgical and medical procedures                                     |
| Ganglioglioma                      | Nervous system neoplasms unspecified malignancy NEC  | Nervous system neoplasms malignant and unspecified NEC | Neoplasms benign, malignant and unspecified (incl cysts and polyps) |
| Ganglioneuroblastoma               | Nervous system neoplasms malignant NEC               | Nervous system neoplasms malignant and unspecified NEC | Neoplasms benign, malignant and unspecified (incl cysts and polyps) |
| Ganglioneuroma                     | Neuromas                                             | Nervous system neoplasms benign                        | Neoplasms benign, malignant and unspecified (incl cysts and polyps) |
| Gastric cancer                     | Gastric neoplasms malignant                          | Gastrointestinal neoplasms malignant and unspecified   | Neoplasms benign, malignant and unspecified (incl cysts and polyps) |
| Gastric cancer recurrent           | Gastric neoplasms malignant                          | Gastrointestinal neoplasms malignant and unspecified   | Neoplasms benign, malignant and unspecified (incl cysts and polyps) |
| Gastric cancer stage 0             | Gastric neoplasms malignant                          | Gastrointestinal neoplasms malignant and unspecified   | Neoplasms benign, malignant and unspecified (incl cysts and polyps) |
| Gastric cancer stage I             | Gastric neoplasms malignant                          | Gastrointestinal neoplasms malignant and unspecified   | Neoplasms benign, malignant and unspecified (incl cysts and polyps) |
| Gastric cancer stage II            | Gastric neoplasms malignant                          | Gastrointestinal neoplasms malignant and unspecified   | Neoplasms benign, malignant and unspecified (incl cysts and polyps) |
| Gastric cancer stage III           | Gastric neoplasms malignant                          | Gastrointestinal neoplasms malignant and unspecified   | Neoplasms benign, malignant and unspecified (incl cysts and polyps) |
| Gastric polypectomy                | Gastric therapeutic procedures                       | Gastrointestinal therapeutic procedures                | Surgical and medical procedures                                     |
| Gastric polyps                     | Benign neoplasms gastrointestinal (excl oral cavity) | Benign neoplasms gastrointestinal                      | Gastrointestinal disorders                                          |
| Gastrinoma                         | Islet cell neoplasms and APUDoma NEC                 | Endocrine neoplasms malignant and unspecified          | Neoplasms benign, malignant and unspecified (incl cysts and polyps) |

|                                           |                                                     |                                                                 |                                                                     |
|-------------------------------------------|-----------------------------------------------------|-----------------------------------------------------------------|---------------------------------------------------------------------|
| Gastrointestinal carcinoma                | Gastrointestinal neoplasms malignant NEC            | Gastrointestinal neoplasms malignant and unspecified            | Neoplasms benign, malignant and unspecified (incl cysts and polyps) |
| Genital neoplasm malignant female         | Female reproductive neoplasms malignant NEC         | Reproductive neoplasms female malignant and unspecified         | Neoplasms benign, malignant and unspecified (incl cysts and polyps) |
| Giant cell epulis                         | Gingival disorders NEC                              | Dental and gingival conditions                                  | Gastrointestinal disorders                                          |
| Giant cell tumour of tendon sheath        | Soft tissue neoplasms benign NEC                    | Soft tissue neoplasms benign                                    | Neoplasms benign, malignant and unspecified (incl cysts and polyps) |
| Gingival polyp                            | Benign oral cavity neoplasms                        | Benign neoplasms gastrointestinal                               | Gastrointestinal disorders                                          |
| Glioblastoma                              | Glial tumours malignant                             | Nervous system neoplasms malignant and unspecified NEC          | Neoplasms benign, malignant and unspecified (incl cysts and polyps) |
| Glioblastoma multiforme                   | Glial tumours malignant                             | Nervous system neoplasms malignant and unspecified NEC          | Neoplasms benign, malignant and unspecified (incl cysts and polyps) |
| Glioma                                    | Nervous system neoplasms unspecified malignancy NEC | Nervous system neoplasms malignant and unspecified NEC          | Neoplasms benign, malignant and unspecified (incl cysts and polyps) |
| Gliosarcoma                               | Glial tumours malignant                             | Nervous system neoplasms malignant and unspecified NEC          | Neoplasms benign, malignant and unspecified (incl cysts and polyps) |
| Glomus tumour                             | Soft tissue neoplasms benign NEC                    | Soft tissue neoplasms benign                                    | Neoplasms benign, malignant and unspecified (incl cysts and polyps) |
| Glossectomy                               | Tongue therapeutic procedures                       | Head and neck therapeutic procedures                            | Surgical and medical procedures                                     |
| Glottis carcinoma                         | Laryngeal neoplasms malignant                       | Respiratory and mediastinal neoplasms malignant and unspecified | Neoplasms benign, malignant and unspecified (incl cysts and polyps) |
| Glucagonoma                               | Islet cell neoplasms and APUDoma NEC                | Endocrine neoplasms malignant and unspecified                   | Neoplasms benign, malignant and unspecified (incl cysts and polyps) |
| Growth hormone-producing pituitary tumour | Hormone secreting pituitary neoplasms               | Endocrine neoplasms malignant and unspecified                   | Neoplasms benign, malignant and unspecified (incl cysts and polyps) |
| Haemangioblastoma                         | Nervous system neoplasms benign NEC                 | Nervous system neoplasms benign                                 | Neoplasms benign, malignant and unspecified (incl cysts and polyps) |

|                                 |                                                    |                                                                        |                                                                     |
|---------------------------------|----------------------------------------------------|------------------------------------------------------------------------|---------------------------------------------------------------------|
| Haemangioma                     | Cardiovascular neoplasms benign                    | Miscellaneous and site unspecified neoplasms benign                    | Neoplasms benign, malignant and unspecified (incl cysts and polyps) |
| Haemangioma congenital          | Vascular anomalies congenital NEC                  | Cardiac and vascular disorders congenital                              | Congenital, familial and genetic disorders                          |
| Haemangioma of breast           | Breast and nipple neoplasms benign                 | Breast neoplasms benign (incl nipple)                                  | Neoplasms benign, malignant and unspecified (incl cysts and polyps) |
| Haemangioma of liver            | Hepatobiliary neoplasms benign                     | Hepatic and biliary neoplasms benign                                   | Neoplasms benign, malignant and unspecified (incl cysts and polyps) |
| Haemangioma of retina           | Retinal disorders congenital                       | Eye disorders congenital                                               | Congenital, familial and genetic disorders                          |
| Haemangioma of skin             | Skin neoplasms benign                              | Cutaneous neoplasms benign                                             | Neoplasms benign, malignant and unspecified (incl cysts and polyps) |
| Haemangiopericytoma             | Cardiovascular neoplasms malignant and unspecified | Miscellaneous and site unspecified neoplasms malignant and unspecified | Neoplasms benign, malignant and unspecified (incl cysts and polyps) |
| Haemangiopericytoma of meninges | Meningiomas malignant                              | Nervous system neoplasms malignant and unspecified NEC                 | Neoplasms benign, malignant and unspecified (incl cysts and polyps) |
| Hair follicle tumour benign     | Skin neoplasms benign                              | Cutaneous neoplasms benign                                             | Neoplasms benign, malignant and unspecified (incl cysts and polyps) |
| Hairy cell leukaemia            | Leukaemias chronic lymphocytic                     | Leukaemias                                                             | Neoplasms benign, malignant and unspecified (incl cysts and polyps) |
| Heavy chain disease             | Plasma cell neoplasms NEC                          | Plasma cell neoplasms                                                  | Neoplasms benign, malignant and unspecified (incl cysts and polyps) |
| Hepatic adenoma                 | Hepatobiliary neoplasms benign                     | Hepatic and biliary neoplasms benign                                   | Neoplasms benign, malignant and unspecified (incl cysts and polyps) |
| Hepatic cyst                    | Hepatic and hepatobiliary disorders NEC            | Hepatic and hepatobiliary disorders                                    | Hepatobiliary disorders                                             |
| Hepatic neoplasm                | Hepatobiliary neoplasms malignancy unspecified     | Hepatobiliary neoplasms malignant and unspecified                      | Neoplasms benign, malignant and unspecified (incl cysts and polyps) |
| Hepatoblastoma recurrent        | Hepatoblastomas                                    | Hepatobiliary neoplasms malignant and unspecified                      | Neoplasms benign, malignant and unspecified (incl cysts and polyps) |

|                                                                  |                                                   |                                                          |                                                                     |
|------------------------------------------------------------------|---------------------------------------------------|----------------------------------------------------------|---------------------------------------------------------------------|
| High grade B-cell lymphoma Burkitt-like lymphoma                 | High grade B-cell lymphomas Burkitt-like lymphoma | Lymphomas non-Hodgkin's B-cell                           | Neoplasms benign, malignant and unspecified (incl cysts and polyps) |
| High grade B-cell lymphoma Burkitt-like lymphoma recurrent       | High grade B-cell lymphomas Burkitt-like lymphoma | Lymphomas non-Hodgkin's B-cell                           | Neoplasms benign, malignant and unspecified (incl cysts and polyps) |
| High grade B-cell lymphoma Burkitt-like lymphoma refractory      | High grade B-cell lymphomas Burkitt-like lymphoma | Lymphomas non-Hodgkin's B-cell                           | Neoplasms benign, malignant and unspecified (incl cysts and polyps) |
| High grade B-cell lymphoma Burkitt-like lymphoma stage I         | High grade B-cell lymphomas Burkitt-like lymphoma | Lymphomas non-Hodgkin's B-cell                           | Neoplasms benign, malignant and unspecified (incl cysts and polyps) |
| High grade B-cell lymphoma Burkitt-like lymphoma stage II        | High grade B-cell lymphomas Burkitt-like lymphoma | Lymphomas non-Hodgkin's B-cell                           | Neoplasms benign, malignant and unspecified (incl cysts and polyps) |
| High grade B-cell lymphoma Burkitt-like lymphoma stage III       | High grade B-cell lymphomas Burkitt-like lymphoma | Lymphomas non-Hodgkin's B-cell                           | Neoplasms benign, malignant and unspecified (incl cysts and polyps) |
| High grade B-cell lymphoma Burkitt-like lymphoma stage IV        | High grade B-cell lymphomas Burkitt-like lymphoma | Lymphomas non-Hodgkin's B-cell                           | Neoplasms benign, malignant and unspecified (incl cysts and polyps) |
| Histiocytosis                                                    | Histiocytoses                                     | Haematopoietic neoplasms (excl leukaemias and lymphomas) | Neoplasms benign, malignant and unspecified (incl cysts and polyps) |
| Hodgkin's disease                                                | Hodgkin's disease NEC                             | Lymphomas Hodgkin's disease                              | Neoplasms benign, malignant and unspecified (incl cysts and polyps) |
| Hodgkin's disease lymphocyte depletion stage I site unspecified  | Hodgkin's disease lymphocyte depletion type       | Lymphomas Hodgkin's disease                              | Neoplasms benign, malignant and unspecified (incl cysts and polyps) |
| Hodgkin's disease lymphocyte depletion stage I subdiaphragm      | Hodgkin's disease lymphocyte depletion type       | Lymphomas Hodgkin's disease                              | Neoplasms benign, malignant and unspecified (incl cysts and polyps) |
| Hodgkin's disease lymphocyte depletion stage I supradiaphragm    | Hodgkin's disease lymphocyte depletion type       | Lymphomas Hodgkin's disease                              | Neoplasms benign, malignant and unspecified (incl cysts and polyps) |
| Hodgkin's disease lymphocyte depletion stage II site unspecified | Hodgkin's disease lymphocyte depletion type       | Lymphomas Hodgkin's disease                              | Neoplasms benign, malignant and unspecified (incl cysts and polyps) |
| Hodgkin's disease lymphocyte depletion stage II subdiaphragm     | Hodgkin's disease lymphocyte depletion type       | Lymphomas Hodgkin's disease                              | Neoplasms benign, malignant and unspecified (incl cysts and polyps) |



|                                                                   |                                                |                             |                                                                     |
|-------------------------------------------------------------------|------------------------------------------------|-----------------------------|---------------------------------------------------------------------|
| Hodgkin's disease lymphocyte depletion stage II supradiaphragm    | Hodgkin's disease lymphocyte depletion type    | Lymphomas Hodgkin's disease | Neoplasms benign, malignant and unspecified (incl cysts and polyps) |
| Hodgkin's disease lymphocyte depletion type recurrent             | Hodgkin's disease lymphocyte depletion type    | Lymphomas Hodgkin's disease | Neoplasms benign, malignant and unspecified (incl cysts and polyps) |
| Hodgkin's disease lymphocyte depletion type refractory            | Hodgkin's disease lymphocyte depletion type    | Lymphomas Hodgkin's disease | Neoplasms benign, malignant and unspecified (incl cysts and polyps) |
| Hodgkin's disease lymphocyte depletion type stage III             | Hodgkin's disease lymphocyte depletion type    | Lymphomas Hodgkin's disease | Neoplasms benign, malignant and unspecified (incl cysts and polyps) |
| Hodgkin's disease lymphocyte depletion type stage IV              | Hodgkin's disease lymphocyte depletion type    | Lymphomas Hodgkin's disease | Neoplasms benign, malignant and unspecified (incl cysts and polyps) |
| Hodgkin's disease lymphocyte depletion type stage unspecified     | Hodgkin's disease lymphocyte depletion type    | Lymphomas Hodgkin's disease | Neoplasms benign, malignant and unspecified (incl cysts and polyps) |
| Hodgkin's disease lymphocyte predominance stage I site unspec     | Hodgkin's disease lymphocyte predominance type | Lymphomas Hodgkin's disease | Neoplasms benign, malignant and unspecified (incl cysts and polyps) |
| Hodgkin's disease lymphocyte predominance stage I subdiaphragm    | Hodgkin's disease lymphocyte predominance type | Lymphomas Hodgkin's disease | Neoplasms benign, malignant and unspecified (incl cysts and polyps) |
| Hodgkin's disease lymphocyte predominance stage I supradiaphragm  | Hodgkin's disease lymphocyte predominance type | Lymphomas Hodgkin's disease | Neoplasms benign, malignant and unspecified (incl cysts and polyps) |
| Hodgkin's disease lymphocyte predominance stage II site unspec    | Hodgkin's disease lymphocyte predominance type | Lymphomas Hodgkin's disease | Neoplasms benign, malignant and unspecified (incl cysts and polyps) |
| Hodgkin's disease lymphocyte predominance stage II subdiaphragm   | Hodgkin's disease lymphocyte predominance type | Lymphomas Hodgkin's disease | Neoplasms benign, malignant and unspecified (incl cysts and polyps) |
| Hodgkin's disease lymphocyte predominance stage II supradiaphragm | Hodgkin's disease lymphocyte predominance type | Lymphomas Hodgkin's disease | Neoplasms benign, malignant and unspecified (incl cysts and polyps) |
| Hodgkin's disease lymphocyte predominance type recurrent          | Hodgkin's disease lymphocyte predominance type | Lymphomas Hodgkin's disease | Neoplasms benign, malignant and unspecified (incl cysts and polyps) |
| Hodgkin's disease lymphocyte predominance type refractory         | Hodgkin's disease lymphocyte predominance type | Lymphomas Hodgkin's disease | Neoplasms benign, malignant and unspecified (incl cysts and polyps) |

|                                                                  |                                                |                             |                                                                     |
|------------------------------------------------------------------|------------------------------------------------|-----------------------------|---------------------------------------------------------------------|
| Hodgkin's disease lymphocyte predominance type stage III         | Hodgkin's disease lymphocyte predominance type | Lymphomas Hodgkin's disease | Neoplasms benign, malignant and unspecified (incl cysts and polyps) |
| Hodgkin's disease lymphocyte predominance type stage IV          | Hodgkin's disease lymphocyte predominance type | Lymphomas Hodgkin's disease | Neoplasms benign, malignant and unspecified (incl cysts and polyps) |
| Hodgkin's disease lymphocyte predominance type stage unspecified | Hodgkin's disease lymphocyte predominance type | Lymphomas Hodgkin's disease | Neoplasms benign, malignant and unspecified (incl cysts and polyps) |
| Hodgkin's disease mixed cellularity recurrent                    | Hodgkin's disease mixed cellularity type       | Lymphomas Hodgkin's disease | Neoplasms benign, malignant and unspecified (incl cysts and polyps) |
| Hodgkin's disease mixed cellularity refractory                   | Hodgkin's disease mixed cellularity type       | Lymphomas Hodgkin's disease | Neoplasms benign, malignant and unspecified (incl cysts and polyps) |
| Hodgkin's disease mixed cellularity stage I site unspecified     | Hodgkin's disease mixed cellularity type       | Lymphomas Hodgkin's disease | Neoplasms benign, malignant and unspecified (incl cysts and polyps) |
| Hodgkin's disease mixed cellularity stage I subdiaphragmatic     | Hodgkin's disease mixed cellularity type       | Lymphomas Hodgkin's disease | Neoplasms benign, malignant and unspecified (incl cysts and polyps) |
| Hodgkin's disease mixed cellularity stage I supradiaphragmatic   | Hodgkin's disease mixed cellularity type       | Lymphomas Hodgkin's disease | Neoplasms benign, malignant and unspecified (incl cysts and polyps) |
| Hodgkin's disease mixed cellularity stage II subdiaphragmatic    | Hodgkin's disease mixed cellularity type       | Lymphomas Hodgkin's disease | Neoplasms benign, malignant and unspecified (incl cysts and polyps) |
| Hodgkin's disease mixed cellularity stage II supradiaphragmatic  | Hodgkin's disease mixed cellularity type       | Lymphomas Hodgkin's disease | Neoplasms benign, malignant and unspecified (incl cysts and polyps) |
| Hodgkin's disease mixed cellularity stage III                    | Hodgkin's disease mixed cellularity type       | Lymphomas Hodgkin's disease | Neoplasms benign, malignant and unspecified (incl cysts and polyps) |
| Hodgkin's disease mixed cellularity stage IV                     | Hodgkin's disease mixed cellularity type       | Lymphomas Hodgkin's disease | Neoplasms benign, malignant and unspecified (incl cysts and polyps) |
| Hodgkin's disease mixed cellularity stage unspecified            | Hodgkin's disease mixed cellularity type       | Lymphomas Hodgkin's disease | Neoplasms benign, malignant and unspecified (incl cysts and polyps) |
| Hodgkin's disease nodular sclerosis                              | Hodgkin's disease nodular sclerosis type       | Lymphomas Hodgkin's disease | Neoplasms benign, malignant and unspecified (incl cysts and polyps) |

|                                                |                                                   |                                               |                                                                     |
|------------------------------------------------|---------------------------------------------------|-----------------------------------------------|---------------------------------------------------------------------|
| Hodgkin's disease nodular sclerosis recurrent  | Hodgkin's disease nodular sclerosis type          | Lymphomas Hodgkin's disease                   | Neoplasms benign, malignant and unspecified (incl cysts and polyps) |
| Hodgkin's disease nodular sclerosis refractory | Hodgkin's disease nodular sclerosis type          | Lymphomas Hodgkin's disease                   | Neoplasms benign, malignant and unspecified (incl cysts and polyps) |
| Hodgkin's disease nodular sclerosis stage III  | Hodgkin's disease nodular sclerosis type          | Lymphomas Hodgkin's disease                   | Neoplasms benign, malignant and unspecified (incl cysts and polyps) |
| Hodgkin's disease nodular sclerosis stage IV   | Hodgkin's disease nodular sclerosis type          | Lymphomas Hodgkin's disease                   | Neoplasms benign, malignant and unspecified (incl cysts and polyps) |
| Hodgkin's disease recurrent                    | Hodgkin's disease NEC                             | Lymphomas Hodgkin's disease                   | Neoplasms benign, malignant and unspecified (incl cysts and polyps) |
| Hodgkin's disease refractory                   | Hodgkin's disease NEC                             | Lymphomas Hodgkin's disease                   | Neoplasms benign, malignant and unspecified (incl cysts and polyps) |
| Hodgkin's disease stage I                      | Hodgkin's disease NEC                             | Lymphomas Hodgkin's disease                   | Neoplasms benign, malignant and unspecified (incl cysts and polyps) |
| Hodgkin's disease stage II                     | Hodgkin's disease NEC                             | Lymphomas Hodgkin's disease                   | Neoplasms benign, malignant and unspecified (incl cysts and polyps) |
| Hodgkin's disease stage III                    | Hodgkin's disease NEC                             | Lymphomas Hodgkin's disease                   | Neoplasms benign, malignant and unspecified (incl cysts and polyps) |
| Hodgkin's disease unclassifiable               | Hodgkin's disease NEC                             | Lymphomas Hodgkin's disease                   | Neoplasms benign, malignant and unspecified (incl cysts and polyps) |
| Hormone-secreting ovarian tumour               | Endocrine neoplasms malignant and unspecified NEC | Endocrine neoplasms malignant and unspecified | Neoplasms benign, malignant and unspecified (incl cysts and polyps) |
| Horner's syndrome                              | Autonomic nervous system disorders                | Neuromuscular disorders                       | Nervous system disorders                                            |
| Hypercalcaemia of malignancy                   | Ectopic endocrine disorders                       | Neoplastic and ectopic endocrinopathies       | Endocrine disorders                                                 |
| Hypergammaglobulinaemia benign monoclonal      | Plasma cell neoplasms NEC                         | Plasma cell neoplasms                         | Neoplasms benign, malignant and unspecified (incl cysts and polyps) |
| Hyperthermia therapy                           | Therapeutic procedures NEC                        | Therapeutic procedures and supportive care    | Surgical and medical procedures                                     |

|                                            |                                                    |                                                                   |                                                                     |
|--------------------------------------------|----------------------------------------------------|-------------------------------------------------------------------|---------------------------------------------------------------------|
|                                            |                                                    | NEC                                                               |                                                                     |
| Hypertrophic osteoarthropathy              | Bone disorders NEC                                 | Bone disorders (excl congenital and fractures)                    | Musculoskeletal and connective tissue disorders                     |
| Hypopharyngeal cancer                      | Hypopharyngeal neoplasms malignant and unspecified | Respiratory and mediastinal neoplasms malignant and unspecified   | Neoplasms benign, malignant and unspecified (incl cysts and polyps) |
| Hypopharyngeal cancer recurrent            | Hypopharyngeal neoplasms malignant and unspecified | Respiratory and mediastinal neoplasms malignant and unspecified   | Neoplasms benign, malignant and unspecified (incl cysts and polyps) |
| Hypopharyngeal cancer stage 0              | Hypopharyngeal neoplasms malignant and unspecified | Respiratory and mediastinal neoplasms malignant and unspecified   | Neoplasms benign, malignant and unspecified (incl cysts and polyps) |
| Hypopharyngeal cancer stage I              | Hypopharyngeal neoplasms malignant and unspecified | Respiratory and mediastinal neoplasms malignant and unspecified   | Neoplasms benign, malignant and unspecified (incl cysts and polyps) |
| Hypopharyngeal cancer stage II             | Hypopharyngeal neoplasms malignant and unspecified | Respiratory and mediastinal neoplasms malignant and unspecified   | Neoplasms benign, malignant and unspecified (incl cysts and polyps) |
| Hypopharyngeal cancer stage III            | Hypopharyngeal neoplasms malignant and unspecified | Respiratory and mediastinal neoplasms malignant and unspecified   | Neoplasms benign, malignant and unspecified (incl cysts and polyps) |
| Hypopharyngeal cancer stage IV             | Hypopharyngeal neoplasms malignant and unspecified | Respiratory and mediastinal neoplasms malignant and unspecified   | Neoplasms benign, malignant and unspecified (incl cysts and polyps) |
| Hypopharyngeal neoplasm benign             | Pharyngeal and laryngeal neoplasms benign          | Respiratory and mediastinal neoplasms benign (excl mesotheliomas) | Neoplasms benign, malignant and unspecified (incl cysts and polyps) |
| Hysterectomy                               | Uterine therapeutic procedures                     | Obstetric and gynaecological therapeutic procedures               | Surgical and medical procedures                                     |
| Inflammatory carcinoma of breast recurrent | Breast and nipple neoplasms malignant              | Breast neoplasms malignant and unspecified (incl nipple)          | Neoplasms benign, malignant and unspecified (incl cysts and polyps) |
| Inflammatory carcinoma of breast stage III | Breast and nipple neoplasms malignant              | Breast neoplasms malignant and unspecified (incl nipple)          | Neoplasms benign, malignant and unspecified (incl cysts and polyps) |
| Inflammatory carcinoma of breast stage IV  | Breast and nipple neoplasms malignant              | Breast neoplasms malignant and unspecified (incl nipple)          | Neoplasms benign, malignant and unspecified (incl cysts and polyps) |

|                                       |                                         |                                                          |                                                                     |
|---------------------------------------|-----------------------------------------|----------------------------------------------------------|---------------------------------------------------------------------|
| Inflammatory carcinoma of the breast  | Breast and nipple neoplasms malignant   | Breast neoplasms malignant and unspecified (incl nipple) | Neoplasms benign, malignant and unspecified (incl cysts and polyps) |
| Injection site cyst                   | Injection site reactions                | Administration site reactions                            | General disorders and administration site conditions                |
| Insulinoma                            | Islet cell neoplasms and APUDoma NEC    | Endocrine neoplasms malignant and unspecified            | Neoplasms benign, malignant and unspecified (incl cysts and polyps) |
| Interleukin therapy                   | Cytokine therapies                      | Therapeutic procedures and supportive care NEC           | Surgical and medical procedures                                     |
| Intestinal T-cell lymphoma recurrent  | Intestinal T-cell lymphomas             | Lymphomas non-Hodgkin's T-cell                           | Neoplasms benign, malignant and unspecified (incl cysts and polyps) |
| Intestinal T-cell lymphoma refractory | Intestinal T-cell lymphomas             | Lymphomas non-Hodgkin's T-cell                           | Neoplasms benign, malignant and unspecified (incl cysts and polyps) |
| Intestinal T-cell lymphoma stage I    | Intestinal T-cell lymphomas             | Lymphomas non-Hodgkin's T-cell                           | Neoplasms benign, malignant and unspecified (incl cysts and polyps) |
| Intestinal T-cell lymphoma stage II   | Intestinal T-cell lymphomas             | Lymphomas non-Hodgkin's T-cell                           | Neoplasms benign, malignant and unspecified (incl cysts and polyps) |
| Intestinal T-cell lymphoma stage III  | Intestinal T-cell lymphomas             | Lymphomas non-Hodgkin's T-cell                           | Neoplasms benign, malignant and unspecified (incl cysts and polyps) |
| Intestinal T-cell lymphoma stage IV   | Intestinal T-cell lymphomas             | Lymphomas non-Hodgkin's T-cell                           | Neoplasms benign, malignant and unspecified (incl cysts and polyps) |
| Intra-abdominal haemangioma           | Gastrointestinal neoplasms benign NEC   | Gastrointestinal neoplasms benign                        | Neoplasms benign, malignant and unspecified (incl cysts and polyps) |
| Intracranial haemangioma              | Nervous system neoplasms benign NEC     | Nervous system neoplasms benign                          | Neoplasms benign, malignant and unspecified (incl cysts and polyps) |
| Intracranial meningioma malignant     | Meningiomas malignant                   | Nervous system neoplasms malignant and unspecified NEC   | Neoplasms benign, malignant and unspecified (incl cysts and polyps) |
| Intracranial tumour haemorrhage       | Oncologic complications and emergencies | Neoplasm related morbidities                             | Neoplasms benign, malignant and unspecified (incl cysts and polyps) |

|                                           |                                                                                 |                                                                 |                                                                     |
|-------------------------------------------|---------------------------------------------------------------------------------|-----------------------------------------------------------------|---------------------------------------------------------------------|
| Intraductal papilloma of breast           | Breast and nipple neoplasms benign                                              | Breast neoplasms benign (incl nipple)                           | Neoplasms benign, malignant and unspecified (incl cysts and polyps) |
| Iris cyst                                 | Ocular cysts and polyps                                                         | Ocular neoplasms                                                | Eye disorders                                                       |
| Jaw cyst                                  | Bone disorders NEC                                                              | Bone disorders (excl congenital and fractures)                  | Musculoskeletal and connective tissue disorders                     |
| Juvenile chronic myelomonocytic leukaemia | Leukaemias chronic myeloid                                                      | Leukaemias                                                      | Neoplasms benign, malignant and unspecified (incl cysts and polyps) |
| Juvenile melanoma benign                  | Skin neoplasms benign                                                           | Cutaneous neoplasms benign                                      | Neoplasms benign, malignant and unspecified (incl cysts and polyps) |
| Kaposi's sarcoma                          | Kaposi's sarcomas                                                               | Soft tissue neoplasms malignant and unspecified                 | Neoplasms benign, malignant and unspecified (incl cysts and polyps) |
| Kaposi's sarcoma AIDS related             | Kaposi's sarcomas                                                               | Soft tissue neoplasms malignant and unspecified                 | Neoplasms benign, malignant and unspecified (incl cysts and polyps) |
| Kaposi's sarcoma classical type           | Kaposi's sarcomas                                                               | Soft tissue neoplasms malignant and unspecified                 | Neoplasms benign, malignant and unspecified (incl cysts and polyps) |
| Keratoacanthoma                           | Skin neoplasms malignant and unspecified (excl melanoma)                        | Skin neoplasms malignant and unspecified                        | Neoplasms benign, malignant and unspecified (incl cysts and polyps) |
| Large cell lung cancer                    | Non-small cell neoplasms malignant of the respiratory tract cell type specified | Respiratory and mediastinal neoplasms malignant and unspecified | Neoplasms benign, malignant and unspecified (incl cysts and polyps) |
| Large cell lung cancer recurrent          | Non-small cell neoplasms malignant of the respiratory tract cell type specified | Respiratory and mediastinal neoplasms malignant and unspecified | Neoplasms benign, malignant and unspecified (incl cysts and polyps) |
| Large cell lung cancer stage 0            | Non-small cell neoplasms malignant of the respiratory tract cell type specified | Respiratory and mediastinal neoplasms malignant and unspecified | Neoplasms benign, malignant and unspecified (incl cysts and polyps) |
| Large cell lung cancer stage I            | Non-small cell neoplasms malignant of the respiratory tract cell type specified | Respiratory and mediastinal neoplasms malignant and unspecified | Neoplasms benign, malignant and unspecified (incl cysts and polyps) |
| Large cell lung cancer stage II           | Non-small cell neoplasms malignant of the respiratory tract cell type specified | Respiratory and mediastinal neoplasms malignant and unspecified | Neoplasms benign, malignant and unspecified (incl cysts and polyps) |

|                                  |                                                                                 |                                                                   |                                                                     |
|----------------------------------|---------------------------------------------------------------------------------|-------------------------------------------------------------------|---------------------------------------------------------------------|
| Large cell lung cancer stage III | Non-small cell neoplasms malignant of the respiratory tract cell type specified | Respiratory and mediastinal neoplasms malignant and unspecified   | Neoplasms benign, malignant and unspecified (incl cysts and polyps) |
| Large cell lung cancer stage IV  | Non-small cell neoplasms malignant of the respiratory tract cell type specified | Respiratory and mediastinal neoplasms malignant and unspecified   | Neoplasms benign, malignant and unspecified (incl cysts and polyps) |
| Large granular lymphocytosis     | Leukaemias chronic T-cell                                                       | Leukaemias                                                        | Neoplasms benign, malignant and unspecified (incl cysts and polyps) |
| Laryngeal cancer                 | Laryngeal neoplasms malignant                                                   | Respiratory and mediastinal neoplasms malignant and unspecified   | Neoplasms benign, malignant and unspecified (incl cysts and polyps) |
| Laryngeal cancer recurrent       | Laryngeal neoplasms malignant                                                   | Respiratory and mediastinal neoplasms malignant and unspecified   | Neoplasms benign, malignant and unspecified (incl cysts and polyps) |
| Laryngeal cancer stage 0         | Laryngeal neoplasms malignant                                                   | Respiratory and mediastinal neoplasms malignant and unspecified   | Neoplasms benign, malignant and unspecified (incl cysts and polyps) |
| Laryngeal cancer stage I         | Laryngeal neoplasms malignant                                                   | Respiratory and mediastinal neoplasms malignant and unspecified   | Neoplasms benign, malignant and unspecified (incl cysts and polyps) |
| Laryngeal cancer stage II        | Laryngeal neoplasms malignant                                                   | Respiratory and mediastinal neoplasms malignant and unspecified   | Neoplasms benign, malignant and unspecified (incl cysts and polyps) |
| Laryngeal cancer stage III       | Laryngeal neoplasms malignant                                                   | Respiratory and mediastinal neoplasms malignant and unspecified   | Neoplasms benign, malignant and unspecified (incl cysts and polyps) |
| Laryngeal cancer stage IV        | Laryngeal neoplasms malignant                                                   | Respiratory and mediastinal neoplasms malignant and unspecified   | Neoplasms benign, malignant and unspecified (incl cysts and polyps) |
| Laryngeal neoplasm               | Laryngeal neoplasms malignancy unspecified                                      | Respiratory and mediastinal neoplasms malignant and unspecified   | Neoplasms benign, malignant and unspecified (incl cysts and polyps) |
| Laryngeal papilloma              | Pharyngeal and laryngeal neoplasms benign                                       | Respiratory and mediastinal neoplasms benign (excl mesotheliomas) | Neoplasms benign, malignant and unspecified (incl cysts and polyps) |
| Laryngeal polyp                  | Laryngeal and adjacent sites disorders NEC (excl infections and neoplasms)      | Upper respiratory tract disorders (excl infections)               | Respiratory, thoracic and mediastinal disorders                     |
| Laryngeal polypectomy            | Laryngeal therapeutic procedures                                                | Head and neck therapeutic procedures                              | Surgical and medical procedures                                     |

|                                   |                                  |                                                                 |                                                                     |
|-----------------------------------|----------------------------------|-----------------------------------------------------------------|---------------------------------------------------------------------|
| Laryngeal squamous cell carcinoma | Laryngeal neoplasms malignant    | Respiratory and mediastinal neoplasms malignant and unspecified | Neoplasms benign, malignant and unspecified (incl cysts and polyps) |
| Leiomyoma                         | Soft tissue neoplasms benign NEC | Soft tissue neoplasms benign                                    | Neoplasms benign, malignant and unspecified (incl cysts and polyps) |
| Leiomyosarcoma                    | Leiomyosarcomas                  | Soft tissue neoplasms malignant and unspecified                 | Neoplasms benign, malignant and unspecified (incl cysts and polyps) |
| Leiomyosarcoma metastatic         | Leiomyosarcomas                  | Soft tissue neoplasms malignant and unspecified                 | Neoplasms benign, malignant and unspecified (incl cysts and polyps) |
| Leiomyosarcoma recurrent          | Leiomyosarcomas                  | Soft tissue neoplasms malignant and unspecified                 | Neoplasms benign, malignant and unspecified (incl cysts and polyps) |
| Lentigo maligna                   | Skin melanomas (excl ocular)     | Skin neoplasms malignant and unspecified                        | Neoplasms benign, malignant and unspecified (incl cysts and polyps) |
| Lentigo maligna recurrent         | Skin melanomas (excl ocular)     | Skin neoplasms malignant and unspecified                        | Neoplasms benign, malignant and unspecified (incl cysts and polyps) |
| Lentigo maligna stage I           | Skin melanomas (excl ocular)     | Skin neoplasms malignant and unspecified                        | Neoplasms benign, malignant and unspecified (incl cysts and polyps) |
| Lentigo maligna stage II          | Skin melanomas (excl ocular)     | Skin neoplasms malignant and unspecified                        | Neoplasms benign, malignant and unspecified (incl cysts and polyps) |
| Lentigo maligna stage III         | Skin melanomas (excl ocular)     | Skin neoplasms malignant and unspecified                        | Neoplasms benign, malignant and unspecified (incl cysts and polyps) |
| Lentigo maligna stage IV          | Skin melanomas (excl ocular)     | Skin neoplasms malignant and unspecified                        | Neoplasms benign, malignant and unspecified (incl cysts and polyps) |
| Leukaemia                         | Leukaemias NEC                   | Leukaemias                                                      | Neoplasms benign, malignant and unspecified (incl cysts and polyps) |
| Leukaemia basophilic              | Leukaemias myeloid NEC           | Leukaemias                                                      | Neoplasms benign, malignant and unspecified (incl cysts and polyps) |
| Leukaemia granulocytic            | Leukaemias myeloid NEC           | Leukaemias                                                      | Neoplasms benign, malignant and unspecified (incl cysts and polyps) |



|                                         |                                                      |                                                                  |                                                                     |
|-----------------------------------------|------------------------------------------------------|------------------------------------------------------------------|---------------------------------------------------------------------|
| Leukaemia monocytic                     | Leukaemias myeloid NEC                               | Leukaemias                                                       | Neoplasms benign, malignant and unspecified (incl cysts and polyps) |
| Leukaemic lymphoma                      | Non-Hodgkin's lymphomas NEC                          | Lymphomas non-Hodgkin's unspecified histology                    | Neoplasms benign, malignant and unspecified (incl cysts and polyps) |
| Leukoerythroblastosis                   | Myeloproliferative disorders (excl leukaemias)       | Haematopoietic neoplasms (excl leukaemias and lymphomas)         | Neoplasms benign, malignant and unspecified (incl cysts and polyps) |
| Leukoplakia oesophageal                 | Oesophageal disorders NEC                            | Gastrointestinal conditions NEC                                  | Gastrointestinal disorders                                          |
| Leukoplakia of penis                    | Penile disorders NEC (excl erection and ejaculation) | Penile and scrotal disorders (excl infections and inflammations) | Reproductive system and breast disorders                            |
| Leukoplakia oral                        | Oral soft tissue disorders NEC                       | Oral soft tissue conditions                                      | Gastrointestinal disorders                                          |
| Leydig cell tumour of the testis        | Reproductive neoplasms male unspecified malignancy   | Reproductive neoplasms male malignant and unspecified            | Neoplasms benign, malignant and unspecified (incl cysts and polyps) |
| Light chain disease                     | Plasma cell neoplasms NEC                            | Plasma cell neoplasms                                            | Neoplasms benign, malignant and unspecified (incl cysts and polyps) |
| Linitis plastica                        | Gastric neoplasms malignant                          | Gastrointestinal neoplasms malignant and unspecified             | Neoplasms benign, malignant and unspecified (incl cysts and polyps) |
| Lip and/or oral cavity cancer recurrent | Lip and oral cavity neoplasms malignant              | Gastrointestinal neoplasms malignant and unspecified             | Neoplasms benign, malignant and unspecified (incl cysts and polyps) |
| Lip and/or oral cavity cancer stage 0   | Lip and oral cavity neoplasms malignant              | Gastrointestinal neoplasms malignant and unspecified             | Neoplasms benign, malignant and unspecified (incl cysts and polyps) |
| Lip and/or oral cavity cancer stage I   | Lip and oral cavity neoplasms malignant              | Gastrointestinal neoplasms malignant and unspecified             | Neoplasms benign, malignant and unspecified (incl cysts and polyps) |
| Lip and/or oral cavity cancer stage II  | Lip and oral cavity neoplasms malignant              | Gastrointestinal neoplasms malignant and unspecified             | Neoplasms benign, malignant and unspecified (incl cysts and polyps) |
| Lip and/or oral cavity cancer stage III | Lip and oral cavity neoplasms malignant              | Gastrointestinal neoplasms malignant and unspecified             | Neoplasms benign, malignant and unspecified (incl cysts and polyps) |
| Lip and/or oral cavity cancer stage IV  | Lip and oral cavity neoplasms malignant              | Gastrointestinal neoplasms malignant and                         | Neoplasms benign, malignant and                                     |

|                                          |                                                                                 |                                                                 |                                                                     |
|------------------------------------------|---------------------------------------------------------------------------------|-----------------------------------------------------------------|---------------------------------------------------------------------|
|                                          |                                                                                 | unspecified                                                     | unspecified (incl cysts and polyps)                                 |
| Lip neoplasm benign                      | Lip and oral cavity neoplasms benign                                            | Gastrointestinal neoplasms benign                               | Neoplasms benign, malignant and unspecified (incl cysts and polyps) |
| Lip neoplasm malignant stage unspecified | Lip and oral cavity neoplasms malignant                                         | Gastrointestinal neoplasms malignant and unspecified            | Neoplasms benign, malignant and unspecified (incl cysts and polyps) |
| Lipoma                                   | Soft tissue neoplasms benign NEC                                                | Soft tissue neoplasms benign                                    | Neoplasms benign, malignant and unspecified (incl cysts and polyps) |
| Lipoma of breast                         | Breast and nipple neoplasms benign                                              | Breast neoplasms benign (incl nipple)                           | Neoplasms benign, malignant and unspecified (incl cysts and polyps) |
| Liposarcoma                              | Liposarcomas malignant                                                          | Soft tissue neoplasms malignant and unspecified                 | Neoplasms benign, malignant and unspecified (incl cysts and polyps) |
| Liposarcoma metastatic                   | Liposarcomas malignant                                                          | Soft tissue neoplasms malignant and unspecified                 | Neoplasms benign, malignant and unspecified (incl cysts and polyps) |
| Liposarcoma recurrent                    | Liposarcomas malignant                                                          | Soft tissue neoplasms malignant and unspecified                 | Neoplasms benign, malignant and unspecified (incl cysts and polyps) |
| Lung lobectomy                           | Bronchial and pulmonary therapeutic procedures                                  | Respiratory tract therapeutic procedures                        | Surgical and medical procedures                                     |
| Lung adenocarcinoma                      | Non-small cell neoplasms malignant of the respiratory tract cell type specified | Respiratory and mediastinal neoplasms malignant and unspecified | Neoplasms benign, malignant and unspecified (incl cysts and polyps) |
| Lung adenocarcinoma recurrent            | Non-small cell neoplasms malignant of the respiratory tract cell type specified | Respiratory and mediastinal neoplasms malignant and unspecified | Neoplasms benign, malignant and unspecified (incl cysts and polyps) |
| Lung adenocarcinoma stage 0              | Non-small cell neoplasms malignant of the respiratory tract cell type specified | Respiratory and mediastinal neoplasms malignant and unspecified | Neoplasms benign, malignant and unspecified (incl cysts and polyps) |
| Lung adenocarcinoma stage I              | Non-small cell neoplasms malignant of the respiratory tract cell type specified | Respiratory and mediastinal neoplasms malignant and unspecified | Neoplasms benign, malignant and unspecified (incl cysts and polyps) |
| Lung adenocarcinoma stage II             | Non-small cell neoplasms malignant of the respiratory tract cell type specified | Respiratory and mediastinal neoplasms malignant and unspecified | Neoplasms benign, malignant and unspecified (incl cysts and polyps) |
| Lung adenocarcinoma stage III            | Non-small cell neoplasms malignant of the respiratory                           | Respiratory and mediastinal neoplasms                           | Neoplasms benign, malignant and                                     |

|                                                |                                                                                 |                                                                 |                                                                     |
|------------------------------------------------|---------------------------------------------------------------------------------|-----------------------------------------------------------------|---------------------------------------------------------------------|
|                                                | tract cell type specified                                                       | malignant and unspecified                                       | unspecified (incl cysts and polyps)                                 |
| Lung adenocarcinoma stage IV                   | Non-small cell neoplasms malignant of the respiratory tract cell type specified | Respiratory and mediastinal neoplasms malignant and unspecified | Neoplasms benign, malignant and unspecified (incl cysts and polyps) |
| Lung carcinoma cell type unspecified recurrent | Respiratory tract and pleural neoplasms malignant cell type unspecified NEC     | Respiratory and mediastinal neoplasms malignant and unspecified | Neoplasms benign, malignant and unspecified (incl cysts and polyps) |
| Lung carcinoma cell type unspecified stage 0   | Respiratory tract and pleural neoplasms malignant cell type unspecified NEC     | Respiratory and mediastinal neoplasms malignant and unspecified | Neoplasms benign, malignant and unspecified (incl cysts and polyps) |
| Lung carcinoma cell type unspecified stage I   | Respiratory tract and pleural neoplasms malignant cell type unspecified NEC     | Respiratory and mediastinal neoplasms malignant and unspecified | Neoplasms benign, malignant and unspecified (incl cysts and polyps) |
| Lung carcinoma cell type unspecified stage II  | Respiratory tract and pleural neoplasms malignant cell type unspecified NEC     | Respiratory and mediastinal neoplasms malignant and unspecified | Neoplasms benign, malignant and unspecified (incl cysts and polyps) |
| Lung carcinoma cell type unspecified stage III | Respiratory tract and pleural neoplasms malignant cell type unspecified NEC     | Respiratory and mediastinal neoplasms malignant and unspecified | Neoplasms benign, malignant and unspecified (incl cysts and polyps) |
| Lung carcinoma cell type unspecified stage IV  | Respiratory tract and pleural neoplasms malignant cell type unspecified NEC     | Respiratory and mediastinal neoplasms malignant and unspecified | Neoplasms benign, malignant and unspecified (incl cysts and polyps) |
| Lung squamous cell carcinoma recurrent         | Non-small cell neoplasms malignant of the respiratory tract cell type specified | Respiratory and mediastinal neoplasms malignant and unspecified | Neoplasms benign, malignant and unspecified (incl cysts and polyps) |
| Lung squamous cell carcinoma stage 0           | Non-small cell neoplasms malignant of the respiratory tract cell type specified | Respiratory and mediastinal neoplasms malignant and unspecified | Neoplasms benign, malignant and unspecified (incl cysts and polyps) |
| Lung squamous cell carcinoma stage I           | Non-small cell neoplasms malignant of the respiratory tract cell type specified | Respiratory and mediastinal neoplasms malignant and unspecified | Neoplasms benign, malignant and unspecified (incl cysts and polyps) |
| Lung squamous cell carcinoma stage II          | Non-small cell neoplasms malignant of the respiratory tract cell type specified | Respiratory and mediastinal neoplasms malignant and unspecified | Neoplasms benign, malignant and unspecified (incl cysts and polyps) |
| Lung squamous cell carcinoma stage III         | Non-small cell neoplasms malignant of the respiratory tract cell type specified | Respiratory and mediastinal neoplasms malignant and unspecified | Neoplasms benign, malignant and unspecified (incl cysts and polyps) |
| Lung squamous cell carcinoma stage IV          | Non-small cell neoplasms malignant of the respiratory tract cell type specified | Respiratory and mediastinal neoplasms malignant and unspecified | Neoplasms benign, malignant and unspecified (incl cysts and polyps) |

|                                                     |                                            |                                                 |                                                                     |
|-----------------------------------------------------|--------------------------------------------|-------------------------------------------------|---------------------------------------------------------------------|
| Lymphangioma                                        | Soft tissue neoplasms benign NEC           | Soft tissue neoplasms benign                    | Neoplasms benign, malignant and unspecified (incl cysts and polyps) |
| Lymphangiosarcoma                                   | Lymphangiosarcomas                         | Soft tissue neoplasms malignant and unspecified | Neoplasms benign, malignant and unspecified (incl cysts and polyps) |
| Lymphocyte adoptive therapy                         | Cellular antitumour therapies              | Therapeutic procedures and supportive care NEC  | Surgical and medical procedures                                     |
| Lymphocytic leukaemia                               | Leukaemias lymphocytic NEC                 | Leukaemias                                      | Neoplasms benign, malignant and unspecified (incl cysts and polyps) |
| Lymphoid leukaemia (in remission)                   | Leukaemias lymphocytic NEC                 | Leukaemias                                      | Neoplasms benign, malignant and unspecified (incl cysts and polyps) |
| Lymphoma                                            | Lymphomas unspecified NEC                  | Lymphomas NEC                                   | Neoplasms benign, malignant and unspecified (incl cysts and polyps) |
| Lymphoma AIDS related                               | Lymphomas unspecified NEC                  | Lymphomas NEC                                   | Neoplasms benign, malignant and unspecified (incl cysts and polyps) |
| Lymphoplasmacytoid lymphoma/immunocytoma            | Lymphoplasmacytoid lymphomas/immunocytomas | Lymphomas non-Hodgkin's B-cell                  | Neoplasms benign, malignant and unspecified (incl cysts and polyps) |
| Lymphoplasmacytoid lymphoma/immunocytoma recurrent  | Lymphoplasmacytoid lymphomas/immunocytomas | Lymphomas non-Hodgkin's B-cell                  | Neoplasms benign, malignant and unspecified (incl cysts and polyps) |
| Lymphoplasmacytoid lymphoma/immunocytoma refractory | Lymphoplasmacytoid lymphomas/immunocytomas | Lymphomas non-Hodgkin's B-cell                  | Neoplasms benign, malignant and unspecified (incl cysts and polyps) |
| Lymphoplasmacytoid lymphoma/immunocytoma stage I    | Lymphoplasmacytoid lymphomas/immunocytomas | Lymphomas non-Hodgkin's B-cell                  | Neoplasms benign, malignant and unspecified (incl cysts and polyps) |
| Lymphoplasmacytoid lymphoma/immunocytoma stage II   | Lymphoplasmacytoid lymphomas/immunocytomas | Lymphomas non-Hodgkin's B-cell                  | Neoplasms benign, malignant and unspecified (incl cysts and polyps) |
| Lymphoplasmacytoid lymphoma/immunocytoma stage III  | Lymphoplasmacytoid lymphomas/immunocytomas | Lymphomas non-Hodgkin's B-cell                  | Neoplasms benign, malignant and unspecified (incl cysts and polyps) |
| Lymphoplasmacytoid lymphoma/immunocytoma stage IV   | Lymphoplasmacytoid lymphomas/immunocytomas | Lymphomas non-Hodgkin's B-cell                  | Neoplasms benign, malignant and unspecified (incl cysts and polyps) |

|                                              |                                                    |                                                                        |                                                                     |
|----------------------------------------------|----------------------------------------------------|------------------------------------------------------------------------|---------------------------------------------------------------------|
| Malignant ascites                            | Oncologic complications and emergencies            | Neoplasm related morbidities                                           | Neoplasms benign, malignant and unspecified (incl cysts and polyps) |
| Malignant breast lump removal                | Breast neoplasm removal                            | Breast therapeutic procedures                                          | Surgical and medical procedures                                     |
| Malignant fibrous histiocytoma               | Fibrous histiocytomas malignant                    | Soft tissue neoplasms malignant and unspecified                        | Neoplasms benign, malignant and unspecified (incl cysts and polyps) |
| Malignant fibrous histiocytoma metastatic    | Fibrous histiocytomas malignant                    | Soft tissue neoplasms malignant and unspecified                        | Neoplasms benign, malignant and unspecified (incl cysts and polyps) |
| Malignant fibrous histiocytoma of bone       | Bone sarcomas                                      | Skeletal neoplasms malignant and unspecified                           | Neoplasms benign, malignant and unspecified (incl cysts and polyps) |
| Malignant fibrous histiocytoma recurrent     | Fibrous histiocytomas malignant                    | Soft tissue neoplasms malignant and unspecified                        | Neoplasms benign, malignant and unspecified (incl cysts and polyps) |
| Malignant haemangiopericytoma                | Cardiovascular neoplasms malignant and unspecified | Miscellaneous and site unspecified neoplasms malignant and unspecified | Neoplasms benign, malignant and unspecified (incl cysts and polyps) |
| Malignant haemangiopericytoma metastatic     | Cardiovascular neoplasms malignant and unspecified | Miscellaneous and site unspecified neoplasms malignant and unspecified | Neoplasms benign, malignant and unspecified (incl cysts and polyps) |
| Malignant haemangiopericytoma recurrent      | Cardiovascular neoplasms malignant and unspecified | Miscellaneous and site unspecified neoplasms malignant and unspecified | Neoplasms benign, malignant and unspecified (incl cysts and polyps) |
| Malignant histiocytosis                      | Histiocytoses                                      | Haematopoietic neoplasms (excl leukaemias and lymphomas)               | Neoplasms benign, malignant and unspecified (incl cysts and polyps) |
| Malignant hydatidiform mole                  | Extragenital primary germ cell neoplasms           | Miscellaneous and site unspecified neoplasms malignant and unspecified | Neoplasms benign, malignant and unspecified (incl cysts and polyps) |
| Malignant lymphoma unclassifiable high grade | Lymphomas unclassifiable malignant                 | Lymphomas NEC                                                          | Neoplasms benign, malignant and unspecified (incl cysts and polyps) |
| Malignant lymphoma unclassifiable low grade  | Lymphomas unclassifiable malignant                 | Lymphomas NEC                                                          | Neoplasms benign, malignant and unspecified (incl cysts and polyps) |
| Malignant mast cell neoplasm                 | Haematologic neoplasms NEC                         | Haematopoietic neoplasms (excl leukaemias and lymphomas)               | Neoplasms benign, malignant and unspecified (incl cysts and polyps) |

|                                             |                                             |                                                                        |                                                                     |
|---------------------------------------------|---------------------------------------------|------------------------------------------------------------------------|---------------------------------------------------------------------|
| Malignant melanoma                          | Skin melanomas (excl ocular)                | Skin neoplasms malignant and unspecified                               | Neoplasms benign, malignant and unspecified (incl cysts and polyps) |
| Malignant melanoma in situ                  | Skin melanomas (excl ocular)                | Skin neoplasms malignant and unspecified                               | Neoplasms benign, malignant and unspecified (incl cysts and polyps) |
| Malignant melanoma of sites other than skin | Neoplasms malignant site unspecified NEC    | Miscellaneous and site unspecified neoplasms malignant and unspecified | Neoplasms benign, malignant and unspecified (incl cysts and polyps) |
| Malignant melanoma stage I                  | Skin melanomas (excl ocular)                | Skin neoplasms malignant and unspecified                               | Neoplasms benign, malignant and unspecified (incl cysts and polyps) |
| Malignant melanoma stage II                 | Skin melanomas (excl ocular)                | Skin neoplasms malignant and unspecified                               | Neoplasms benign, malignant and unspecified (incl cysts and polyps) |
| Malignant melanoma stage III                | Skin melanomas (excl ocular)                | Skin neoplasms malignant and unspecified                               | Neoplasms benign, malignant and unspecified (incl cysts and polyps) |
| Malignant melanoma stage IV                 | Skin melanomas (excl ocular)                | Skin neoplasms malignant and unspecified                               | Neoplasms benign, malignant and unspecified (incl cysts and polyps) |
| Malignant mesenchymoma metastatic           | Mesenchymomas malignant                     | Soft tissue neoplasms malignant and unspecified                        | Neoplasms benign, malignant and unspecified (incl cysts and polyps) |
| Malignant mesenchymoma recurrent            | Mesenchymomas malignant                     | Soft tissue neoplasms malignant and unspecified                        | Neoplasms benign, malignant and unspecified (incl cysts and polyps) |
| Malignant neoplasm of ampulla of Vater      | Hepatobiliary neoplasms malignant NEC       | Hepatobiliary neoplasms malignant and unspecified                      | Neoplasms benign, malignant and unspecified (incl cysts and polyps) |
| Malignant neoplasm of choroid               | Ocular neoplasms malignant (excl melanomas) | Ocular neoplasms                                                       | Neoplasms benign, malignant and unspecified (incl cysts and polyps) |
| Malignant neoplasm of conjunctiva           | Ocular neoplasms malignant (excl melanomas) | Ocular neoplasms                                                       | Neoplasms benign, malignant and unspecified (incl cysts and polyps) |
| Malignant neoplasm of cornea                | Ocular neoplasms malignant (excl melanomas) | Ocular neoplasms                                                       | Neoplasms benign, malignant and unspecified (incl cysts and polyps) |
| Malignant neoplasm of eye                   | Ocular neoplasms malignant (excl melanomas) | Ocular neoplasms                                                       | Neoplasms benign, malignant and unspecified (incl cysts and polyps) |

|                                            |                                                                             |                                                                 |                                                                     |
|--------------------------------------------|-----------------------------------------------------------------------------|-----------------------------------------------------------------|---------------------------------------------------------------------|
| Malignant neoplasm of islets of Langerhans | Islet cell neoplasms and APUDoma NEC                                        | Endocrine neoplasms malignant and unspecified                   | Neoplasms benign, malignant and unspecified (incl cysts and polyps) |
| Malignant neoplasm of lacrimal duct        | Ocular neoplasms malignant (excl melanomas)                                 | Ocular neoplasms                                                | Neoplasms benign, malignant and unspecified (incl cysts and polyps) |
| Malignant neoplasm of lacrimal gland       | Ocular neoplasms malignant (excl melanomas)                                 | Ocular neoplasms                                                | Neoplasms benign, malignant and unspecified (incl cysts and polyps) |
| Malignant neoplasm of orbit                | Ocular neoplasms malignant (excl melanomas)                                 | Ocular neoplasms                                                | Neoplasms benign, malignant and unspecified (incl cysts and polyps) |
| Malignant neoplasm of paraurethral glands  | Urinary tract neoplasms malignant NEC                                       | Renal and urinary tract neoplasms malignant and unspecified     | Neoplasms benign, malignant and unspecified (incl cysts and polyps) |
| Malignant neoplasm of placenta             | Female reproductive neoplasms malignant NEC                                 | Reproductive neoplasms female malignant and unspecified         | Neoplasms benign, malignant and unspecified (incl cysts and polyps) |
| Malignant neoplasm of pleura               | Respiratory tract and pleural neoplasms malignant cell type unspecified NEC | Respiratory and mediastinal neoplasms malignant and unspecified | Neoplasms benign, malignant and unspecified (incl cysts and polyps) |
| Malignant neoplasm of renal pelvis         | Renal pelvis and ureter neoplasms malignant                                 | Renal and urinary tract neoplasms malignant and unspecified     | Neoplasms benign, malignant and unspecified (incl cysts and polyps) |
| Malignant neoplasm of retina               | Ocular neoplasms malignant (excl melanomas)                                 | Ocular neoplasms                                                | Neoplasms benign, malignant and unspecified (incl cysts and polyps) |
| Malignant neoplasm of spermatic cord       | Reproductive neoplasms male malignant NEC                                   | Reproductive neoplasms male malignant and unspecified           | Neoplasms benign, malignant and unspecified (incl cysts and polyps) |
| Malignant neoplasm of spinal cord          | Central nervous system neoplasms malignant NEC                              | Nervous system neoplasms malignant and unspecified NEC          | Neoplasms benign, malignant and unspecified (incl cysts and polyps) |
| Malignant neoplasm of thorax               | Mediastinal neoplasms malignant                                             | Respiratory and mediastinal neoplasms malignant and unspecified | Neoplasms benign, malignant and unspecified (incl cysts and polyps) |
| Malignant neoplasm of uterine adnexa       | Female reproductive neoplasms malignant NEC                                 | Reproductive neoplasms female malignant and unspecified         | Neoplasms benign, malignant and unspecified (incl cysts and polyps) |
| Malignant oligodendroglioma                | Glial tumours malignant                                                     | Nervous system neoplasms malignant and unspecified NEC          | Neoplasms benign, malignant and unspecified (incl cysts and polyps) |

|                                 |                                                          |                                                          |                                                                     |
|---------------------------------|----------------------------------------------------------|----------------------------------------------------------|---------------------------------------------------------------------|
| Malignant ovarian cyst          | Ovarian neoplasms malignant (excl germ cell)             | Reproductive neoplasms female malignant and unspecified  | Neoplasms benign, malignant and unspecified (incl cysts and polyps) |
| Malignant palate neoplasm       | Lip and oral cavity neoplasms malignant                  | Gastrointestinal neoplasms malignant and unspecified     | Neoplasms benign, malignant and unspecified (incl cysts and polyps) |
| Malignant pituitary tumour      | Endocrine neoplasms malignant and unspecified NEC        | Endocrine neoplasms malignant and unspecified            | Neoplasms benign, malignant and unspecified (incl cysts and polyps) |
| Malignant pleural effusion      | Oncologic complications and emergencies                  | Neoplasm related morbidities                             | Neoplasms benign, malignant and unspecified (incl cysts and polyps) |
| Malignant splenic neoplasm      | Haematologic neoplasms NEC                               | Haematopoietic neoplasms (excl leukaemias and lymphomas) | Neoplasms benign, malignant and unspecified (incl cysts and polyps) |
| Mantle cell lymphoma recurrent  | Mantle cell lymphomas                                    | Lymphomas non-Hodgkin's B-cell                           | Neoplasms benign, malignant and unspecified (incl cysts and polyps) |
| Mantle cell lymphoma refractory | Mantle cell lymphomas                                    | Lymphomas non-Hodgkin's B-cell                           | Neoplasms benign, malignant and unspecified (incl cysts and polyps) |
| Mantle cell lymphoma stage I    | Mantle cell lymphomas                                    | Lymphomas non-Hodgkin's B-cell                           | Neoplasms benign, malignant and unspecified (incl cysts and polyps) |
| Mantle cell lymphoma stage II   | Mantle cell lymphomas                                    | Lymphomas non-Hodgkin's B-cell                           | Neoplasms benign, malignant and unspecified (incl cysts and polyps) |
| Mantle cell lymphoma stage III  | Mantle cell lymphomas                                    | Lymphomas non-Hodgkin's B-cell                           | Neoplasms benign, malignant and unspecified (incl cysts and polyps) |
| Mantle cell lymphoma stage IV   | Mantle cell lymphomas                                    | Lymphomas non-Hodgkin's B-cell                           | Neoplasms benign, malignant and unspecified (incl cysts and polyps) |
| Marrow hyperplasia              | Haematologic neoplasms NEC                               | Haematopoietic neoplasms (excl leukaemias and lymphomas) | Neoplasms benign, malignant and unspecified (incl cysts and polyps) |
| Mastectomy                      | Mastectomies                                             | Breast therapeutic procedures                            | Surgical and medical procedures                                     |
| Mastocytoma                     | Skin neoplasms malignant and unspecified (excl melanoma) | Skin neoplasms malignant and unspecified                 | Neoplasms benign, malignant and unspecified (incl cysts and polyps) |



|                                    |                                                                    |                                                                 |                                                                     |
|------------------------------------|--------------------------------------------------------------------|-----------------------------------------------------------------|---------------------------------------------------------------------|
| Mastoidectomy                      | Mastoid therapeutic procedures                                     | Head and neck therapeutic procedures                            | Surgical and medical procedures                                     |
| Mature B-cell type acute leukaemia | Leukaemias acute lymphocytic                                       | Leukaemias                                                      | Neoplasms benign, malignant and unspecified (incl cysts and polyps) |
| Maxillofacial sinus neoplasm       | Respiratory tract and pleural neoplasms malignancy unspecified NEC | Respiratory and mediastinal neoplasms malignant and unspecified | Neoplasms benign, malignant and unspecified (incl cysts and polyps) |
| Mediastinum neoplasm               | Mediastinal neoplasms malignancy unspecified NEC                   | Respiratory and mediastinal neoplasms malignant and unspecified | Neoplasms benign, malignant and unspecified (incl cysts and polyps) |
| Medullary carcinoma of breast      | Breast and nipple neoplasms malignant                              | Breast neoplasms malignant and unspecified (incl nipple)        | Neoplasms benign, malignant and unspecified (incl cysts and polyps) |
| Medullary thyroid cancer           | Thyroid neoplasms malignant                                        | Endocrine neoplasms malignant and unspecified                   | Neoplasms benign, malignant and unspecified (incl cysts and polyps) |
| Medulloblastoma                    | Glial tumours malignant                                            | Nervous system neoplasms malignant and unspecified NEC          | Neoplasms benign, malignant and unspecified (incl cysts and polyps) |
| Megaloblasts increased             | Bone marrow and immune tissue histopathology procedures            | Haematology investigations (incl blood groups)                  | Investigations                                                      |
| Meigs' syndrome                    | Oncologic complications and emergencies                            | Neoplasm related morbidities                                    | Neoplasms benign, malignant and unspecified (incl cysts and polyps) |
| Melanocytic naevus                 | Skin neoplasms benign                                              | Cutaneous neoplasms benign                                      | Neoplasms benign, malignant and unspecified (incl cysts and polyps) |
| Meningioma                         | Nervous system neoplasms unspecified malignancy NEC                | Nervous system neoplasms malignant and unspecified NEC          | Neoplasms benign, malignant and unspecified (incl cysts and polyps) |
| Meningioma benign                  | Meningiomas benign                                                 | Nervous system neoplasms benign                                 | Neoplasms benign, malignant and unspecified (incl cysts and polyps) |
| Meningioma malignant               | Meningiomas malignant                                              | Nervous system neoplasms malignant and unspecified NEC          | Neoplasms benign, malignant and unspecified (incl cysts and polyps) |
| Mesonephric duct cyst              | Female reproductive tract disorders congenital                     | Reproductive tract and breast disorders congenital              | Congenital, familial and genetic disorders                          |

|                                  |                                         |               |                                                                     |
|----------------------------------|-----------------------------------------|---------------|---------------------------------------------------------------------|
| Mesothelioma                     | Mesotheliomas malignant and unspecified | Mesotheliomas | Neoplasms benign, malignant and unspecified (incl cysts and polyps) |
| Mesothelioma malignant           | Mesotheliomas malignant and unspecified | Mesotheliomas | Neoplasms benign, malignant and unspecified (incl cysts and polyps) |
| Mesothelioma malignant recurrent | Mesotheliomas malignant and unspecified | Mesotheliomas | Neoplasms benign, malignant and unspecified (incl cysts and polyps) |
| Metastases to abdominal cavity   | Metastases to specified sites           | Metastases    | Neoplasms benign, malignant and unspecified (incl cysts and polyps) |
| Metastases to adrenals           | Metastases to specified sites           | Metastases    | Neoplasms benign, malignant and unspecified (incl cysts and polyps) |
| Metastases to bone               | Metastases to specified sites           | Metastases    | Neoplasms benign, malignant and unspecified (incl cysts and polyps) |
| Metastases to breast             | Metastases to specified sites           | Metastases    | Neoplasms benign, malignant and unspecified (incl cysts and polyps) |
| Metastases to kidney             | Metastases to specified sites           | Metastases    | Neoplasms benign, malignant and unspecified (incl cysts and polyps) |
| Metastases to large intestine    | Metastases to specified sites           | Metastases    | Neoplasms benign, malignant and unspecified (incl cysts and polyps) |
| Metastases to liver              | Metastases to specified sites           | Metastases    | Neoplasms benign, malignant and unspecified (incl cysts and polyps) |
| Metastases to lung               | Metastases to specified sites           | Metastases    | Neoplasms benign, malignant and unspecified (incl cysts and polyps) |
| Metastases to lymph nodes        | Metastases to specified sites           | Metastases    | Neoplasms benign, malignant and unspecified (incl cysts and polyps) |
| Metastases to neck               | Metastases to specified sites           | Metastases    | Neoplasms benign, malignant and unspecified (incl cysts and polyps) |
| Metastases to ovary              | Metastases to specified sites           | Metastases    | Neoplasms benign, malignant and unspecified (incl cysts and polyps) |

|                                          |                                         |                                                         |                                                                     |
|------------------------------------------|-----------------------------------------|---------------------------------------------------------|---------------------------------------------------------------------|
| Metastases to pleura                     | Metastases to specified sites           | Metastases                                              | Neoplasms benign, malignant and unspecified (incl cysts and polyps) |
| Metastases to skin                       | Metastases to specified sites           | Metastases                                              | Neoplasms benign, malignant and unspecified (incl cysts and polyps) |
| Metastases to small intestine            | Metastases to specified sites           | Metastases                                              | Neoplasms benign, malignant and unspecified (incl cysts and polyps) |
| Metastases to spine                      | Metastases to specified sites           | Metastases                                              | Neoplasms benign, malignant and unspecified (incl cysts and polyps) |
| Metastases to the mediastinum            | Metastases to specified sites           | Metastases                                              | Neoplasms benign, malignant and unspecified (incl cysts and polyps) |
| Metastatic malignant melanoma            | Skin melanomas (excl ocular)            | Skin neoplasms malignant and unspecified                | Neoplasms benign, malignant and unspecified (incl cysts and polyps) |
| Metastatic pain                          | Oncologic complications and emergencies | Neoplasm related morbidities                            | Neoplasms benign, malignant and unspecified (incl cysts and polyps) |
| Mixed hepatocellular cholangiocarcinoma  | Hepatobiliary neoplasms malignant NEC   | Hepatobiliary neoplasms malignant and unspecified       | Neoplasms benign, malignant and unspecified (incl cysts and polyps) |
| Modified radical mastectomy              | Mastectomies                            | Breast therapeutic procedures                           | Surgical and medical procedures                                     |
| Mouth cyst                               | Benign oral cavity neoplasms            | Benign neoplasms gastrointestinal                       | Gastrointestinal disorders                                          |
| Mucinous endometrial carcinoma           | Endometrial neoplasms malignant         | Reproductive neoplasms female malignant and unspecified | Neoplasms benign, malignant and unspecified (incl cysts and polyps) |
| Mucosal cyst of postmastoidectomy cavity | Mastoid disorders                       | Middle ear disorders (excl congenital)                  | Ear and labyrinth disorders                                         |
| Multiple gated acquisition scan abnormal | Cardiac function diagnostic procedures  | Cardiac and vascular investigations (excl enzyme tests) | Investigations                                                      |
| Myasthenic syndrome                      | Neuromuscular junction dysfunction      | Neuromuscular disorders                                 | Nervous system disorders                                            |
| Mycosis fungoides                        | Mycoses fungoides                       | Lymphomas non-Hodgkin's T-cell                          | Neoplasms benign, malignant and unspecified (incl cysts and polyps) |

|                                         |                                                                      |                                                                 |                                                                     |
|-----------------------------------------|----------------------------------------------------------------------|-----------------------------------------------------------------|---------------------------------------------------------------------|
| Mycosis fungoides recurrent             | Mycoses fungoides                                                    | Lymphomas non-Hodgkin's T-cell                                  | Neoplasms benign, malignant and unspecified (incl cysts and polyps) |
| Mycosis fungoides refractory            | Mycoses fungoides                                                    | Lymphomas non-Hodgkin's T-cell                                  | Neoplasms benign, malignant and unspecified (incl cysts and polyps) |
| Mycosis fungoides stage I               | Mycoses fungoides                                                    | Lymphomas non-Hodgkin's T-cell                                  | Neoplasms benign, malignant and unspecified (incl cysts and polyps) |
| Mycosis fungoides stage II              | Mycoses fungoides                                                    | Lymphomas non-Hodgkin's T-cell                                  | Neoplasms benign, malignant and unspecified (incl cysts and polyps) |
| Mycosis fungoides stage III             | Mycoses fungoides                                                    | Lymphomas non-Hodgkin's T-cell                                  | Neoplasms benign, malignant and unspecified (incl cysts and polyps) |
| Mycosis fungoides stage IV              | Mycoses fungoides                                                    | Lymphomas non-Hodgkin's T-cell                                  | Neoplasms benign, malignant and unspecified (incl cysts and polyps) |
| Myectomy                                | Muscle therapeutic procedures                                        | Soft tissue therapeutic procedures                              | Surgical and medical procedures                                     |
| Myelodysplastic syndrome                | Myelodysplastic syndromes                                            | Leukaemias                                                      | Neoplasms benign, malignant and unspecified (incl cysts and polyps) |
| Myelodysplastic syndrome unclassifiable | Myelodysplastic syndromes                                            | Leukaemias                                                      | Neoplasms benign, malignant and unspecified (incl cysts and polyps) |
| Myelofibrosis                           | Myeloproliferative disorders (excl leukaemias)                       | Haematopoietic neoplasms (excl leukaemias and lymphomas)        | Neoplasms benign, malignant and unspecified (incl cysts and polyps) |
| Myeloid leukaemia                       | Leukaemias myeloid NEC                                               | Leukaemias                                                      | Neoplasms benign, malignant and unspecified (incl cysts and polyps) |
| Myeloproliferative disorder             | Myeloproliferative disorders (excl leukaemias)                       | Haematopoietic neoplasms (excl leukaemias and lymphomas)        | Neoplasms benign, malignant and unspecified (incl cysts and polyps) |
| Nasal cavity cancer                     | Paranasal sinus and nasal cavity neoplasms malignant and unspecified | Respiratory and mediastinal neoplasms malignant and unspecified | Neoplasms benign, malignant and unspecified (incl cysts and polyps) |
| Nasal polyps                            | Nasal disorders NEC                                                  | Upper respiratory tract disorders (excl infections)             | Respiratory, thoracic and mediastinal disorders                     |

|                                         |                                                                                 |                                                                        |                                                                     |
|-----------------------------------------|---------------------------------------------------------------------------------|------------------------------------------------------------------------|---------------------------------------------------------------------|
| Nasal sinus cancer                      | Paranasal sinus and nasal cavity neoplasms malignant and unspecified            | Respiratory and mediastinal neoplasms malignant and unspecified        | Neoplasms benign, malignant and unspecified (incl cysts and polyps) |
| Nasopharyngeal cancer recurrent         | Oropharyngeal, nasopharyngeal and tonsillar neoplasms malignant and unspecified | Respiratory and mediastinal neoplasms malignant and unspecified        | Neoplasms benign, malignant and unspecified (incl cysts and polyps) |
| Nasopharyngeal cancer stage 0           | Oropharyngeal, nasopharyngeal and tonsillar neoplasms malignant and unspecified | Respiratory and mediastinal neoplasms malignant and unspecified        | Neoplasms benign, malignant and unspecified (incl cysts and polyps) |
| Nasopharyngeal cancer stage I           | Oropharyngeal, nasopharyngeal and tonsillar neoplasms malignant and unspecified | Respiratory and mediastinal neoplasms malignant and unspecified        | Neoplasms benign, malignant and unspecified (incl cysts and polyps) |
| Nasopharyngeal cancer stage II          | Oropharyngeal, nasopharyngeal and tonsillar neoplasms malignant and unspecified | Respiratory and mediastinal neoplasms malignant and unspecified        | Neoplasms benign, malignant and unspecified (incl cysts and polyps) |
| Nasopharyngeal cancer stage III         | Oropharyngeal, nasopharyngeal and tonsillar neoplasms malignant and unspecified | Respiratory and mediastinal neoplasms malignant and unspecified        | Neoplasms benign, malignant and unspecified (incl cysts and polyps) |
| Nasopharyngeal cancer stage IV          | Oropharyngeal, nasopharyngeal and tonsillar neoplasms malignant and unspecified | Respiratory and mediastinal neoplasms malignant and unspecified        | Neoplasms benign, malignant and unspecified (incl cysts and polyps) |
| Nasopharyngeal neoplasm benign          | Oropharyngeal, nasopharyngeal and tonsillar neoplasms benign                    | Respiratory and mediastinal neoplasms benign (excl mesotheliomas)      | Neoplasms benign, malignant and unspecified (incl cysts and polyps) |
| Natural killer-cell leukaemia           | Leukaemias chronic T-cell                                                       | Leukaemias                                                             | Neoplasms benign, malignant and unspecified (incl cysts and polyps) |
| Needle biopsy site unspecified abnormal | Histopathology procedures NEC                                                   | Investigations, imaging and histopathology procedures NEC              | Investigations                                                      |
| Neonatal leukaemia                      | Haematological disorders congenital NEC                                         | Blood and lymphatic system disorders congenital                        | Congenital, familial and genetic disorders                          |
| Neoplasm                                | Neoplasms unspecified malignancy and site unspecified NEC                       | Miscellaneous and site unspecified neoplasms malignant and unspecified | Neoplasms benign, malignant and unspecified (incl cysts and polyps) |
| Neoplasm malignant                      | Neoplasms malignant site unspecified NEC                                        | Miscellaneous and site unspecified neoplasms malignant and unspecified | Neoplasms benign, malignant and unspecified (incl cysts and polyps) |
| Neoplasm prostate                       | Reproductive neoplasms male unspecified malignancy                              | Reproductive neoplasms male malignant and unspecified                  | Neoplasms benign, malignant and unspecified (incl cysts and polyps) |

|                                                |                                                          |                                                             |                                                                     |
|------------------------------------------------|----------------------------------------------------------|-------------------------------------------------------------|---------------------------------------------------------------------|
| Neoplasm skin                                  | Skin neoplasms malignant and unspecified (excl melanoma) | Skin neoplasms malignant and unspecified                    | Neoplasms benign, malignant and unspecified (incl cysts and polyps) |
| Nephrectomy                                    | Renal therapeutic procedures                             | Renal and urinary tract therapeutic procedures              | Surgical and medical procedures                                     |
| Nephroblastoma                                 | Renal neoplasms malignant                                | Renal and urinary tract neoplasms malignant and unspecified | Neoplasms benign, malignant and unspecified (incl cysts and polyps) |
| Neurilemmoma benign                            | Nervous system neoplasms benign NEC                      | Nervous system neoplasms benign                             | Neoplasms benign, malignant and unspecified (incl cysts and polyps) |
| Neuroblastoma                                  | Nervous system neoplasms malignant NEC                   | Nervous system neoplasms malignant and unspecified NEC      | Neoplasms benign, malignant and unspecified (incl cysts and polyps) |
| Neuroendocrine carcinoma of the skin           | Skin neoplasms malignant and unspecified (excl melanoma) | Skin neoplasms malignant and unspecified                    | Neoplasms benign, malignant and unspecified (incl cysts and polyps) |
| Neurofibroma                                   | Nervous system neoplasms benign NEC                      | Nervous system neoplasms benign                             | Neoplasms benign, malignant and unspecified (incl cysts and polyps) |
| Neurofibromatosis                              | Neurological disorders congenital NEC                    | Neurological disorders congenital                           | Congenital, familial and genetic disorders                          |
| Neurofibrosarcoma metastatic                   | Neurofibrosarcomas                                       | Soft tissue neoplasms malignant and unspecified             | Neoplasms benign, malignant and unspecified (incl cysts and polyps) |
| Neurofibrosarcoma recurrent                    | Neurofibrosarcomas                                       | Soft tissue neoplasms malignant and unspecified             | Neoplasms benign, malignant and unspecified (incl cysts and polyps) |
| Neuroma                                        | Neuromas                                                 | Nervous system neoplasms benign                             | Neoplasms benign, malignant and unspecified (incl cysts and polyps) |
| Neurotensinoma                                 | Islet cell neoplasms and APUDoma NEC                     | Endocrine neoplasms malignant and unspecified               | Neoplasms benign, malignant and unspecified (incl cysts and polyps) |
| Nodal marginal zone B-cell lymphoma            | Nodal marginal zone B-cell lymphomas                     | Lymphomas non-Hodgkin's B-cell                              | Neoplasms benign, malignant and unspecified (incl cysts and polyps) |
| Nodal marginal zone B-cell lymphoma recurrent  | Nodal marginal zone B-cell lymphomas                     | Lymphomas non-Hodgkin's B-cell                              | Neoplasms benign, malignant and unspecified (incl cysts and polyps) |
| Nodal marginal zone B-cell lymphoma refractory | Nodal marginal zone B-cell lymphomas                     | Lymphomas non-Hodgkin's B-cell                              | Neoplasms benign, malignant and                                     |

|                                               |                                                                                 |                                                                 |                                                                     |
|-----------------------------------------------|---------------------------------------------------------------------------------|-----------------------------------------------------------------|---------------------------------------------------------------------|
|                                               |                                                                                 |                                                                 | unspecified (incl cysts and polyps)                                 |
| Nodal marginal zone B-cell lymphoma stage I   | Nodal marginal zone B-cell lymphomas                                            | Lymphomas non-Hodgkin's B-cell                                  | Neoplasms benign, malignant and unspecified (incl cysts and polyps) |
| Nodal marginal zone B-cell lymphoma stage II  | Nodal marginal zone B-cell lymphomas                                            | Lymphomas non-Hodgkin's B-cell                                  | Neoplasms benign, malignant and unspecified (incl cysts and polyps) |
| Nodal marginal zone B-cell lymphoma stage III | Nodal marginal zone B-cell lymphomas                                            | Lymphomas non-Hodgkin's B-cell                                  | Neoplasms benign, malignant and unspecified (incl cysts and polyps) |
| Nodal marginal zone B-cell lymphoma stage IV  | Nodal marginal zone B-cell lymphomas                                            | Lymphomas non-Hodgkin's B-cell                                  | Neoplasms benign, malignant and unspecified (incl cysts and polyps) |
| Nodular melanoma                              | Skin melanomas (excl ocular)                                                    | Skin neoplasms malignant and unspecified                        | Neoplasms benign, malignant and unspecified (incl cysts and polyps) |
| Non-small cell lung cancer recurrent          | Non-small cell neoplasms malignant of the respiratory tract cell type specified | Respiratory and mediastinal neoplasms malignant and unspecified | Neoplasms benign, malignant and unspecified (incl cysts and polyps) |
| Non-small cell lung cancer stage 0            | Non-small cell neoplasms malignant of the respiratory tract cell type specified | Respiratory and mediastinal neoplasms malignant and unspecified | Neoplasms benign, malignant and unspecified (incl cysts and polyps) |
| Non-small cell lung cancer stage I            | Non-small cell neoplasms malignant of the respiratory tract cell type specified | Respiratory and mediastinal neoplasms malignant and unspecified | Neoplasms benign, malignant and unspecified (incl cysts and polyps) |
| Non-small cell lung cancer stage II           | Non-small cell neoplasms malignant of the respiratory tract cell type specified | Respiratory and mediastinal neoplasms malignant and unspecified | Neoplasms benign, malignant and unspecified (incl cysts and polyps) |
| Non-small cell lung cancer stage III          | Non-small cell neoplasms malignant of the respiratory tract cell type specified | Respiratory and mediastinal neoplasms malignant and unspecified | Neoplasms benign, malignant and unspecified (incl cysts and polyps) |
| Non-small cell lung cancer stage IIIA         | Non-small cell neoplasms malignant of the respiratory tract cell type specified | Respiratory and mediastinal neoplasms malignant and unspecified | Neoplasms benign, malignant and unspecified (incl cysts and polyps) |
| Non-small cell lung cancer stage IIIB         | Non-small cell neoplasms malignant of the respiratory tract cell type specified | Respiratory and mediastinal neoplasms malignant and unspecified | Neoplasms benign, malignant and unspecified (incl cysts and polyps) |
| Non-small cell lung cancer stage IV           | Non-small cell neoplasms malignant of the respiratory tract cell type specified | Respiratory and mediastinal neoplasms malignant and unspecified | Neoplasms benign, malignant and unspecified (incl cysts and polyps) |

|                                                                    |                                                          |                                                        |                                                                     |
|--------------------------------------------------------------------|----------------------------------------------------------|--------------------------------------------------------|---------------------------------------------------------------------|
| Non-Hodgkin's lymphoma                                             | Non-Hodgkin's lymphomas NEC                              | Lymphomas non-Hodgkin's unspecified histology          | Neoplasms benign, malignant and unspecified (incl cysts and polyps) |
| Non-secretory adenoma of pituitary                                 | Nervous system neoplasms unspecified malignancy NEC      | Nervous system neoplasms malignant and unspecified NEC | Neoplasms benign, malignant and unspecified (incl cysts and polyps) |
| Non-Hodgkin's lymphoma recurrent                                   | Non-Hodgkin's lymphomas NEC                              | Lymphomas non-Hodgkin's unspecified histology          | Neoplasms benign, malignant and unspecified (incl cysts and polyps) |
| Non-Hodgkin's lymphoma refractory                                  | Non-Hodgkin's lymphomas NEC                              | Lymphomas non-Hodgkin's unspecified histology          | Neoplasms benign, malignant and unspecified (incl cysts and polyps) |
| Non-Hodgkin's lymphoma stage I                                     | Non-Hodgkin's lymphomas NEC                              | Lymphomas non-Hodgkin's unspecified histology          | Neoplasms benign, malignant and unspecified (incl cysts and polyps) |
| Non-Hodgkin's lymphoma stage II                                    | Non-Hodgkin's lymphomas NEC                              | Lymphomas non-Hodgkin's unspecified histology          | Neoplasms benign, malignant and unspecified (incl cysts and polyps) |
| Non-Hodgkin's lymphoma stage III                                   | Non-Hodgkin's lymphomas NEC                              | Lymphomas non-Hodgkin's unspecified histology          | Neoplasms benign, malignant and unspecified (incl cysts and polyps) |
| Non-Hodgkin's lymphoma stage IV                                    | Non-Hodgkin's lymphomas NEC                              | Lymphomas non-Hodgkin's unspecified histology          | Neoplasms benign, malignant and unspecified (incl cysts and polyps) |
| Non-Hodgkin's lymphoma unspecified histology aggressive recurrent  | Non-Hodgkin's lymphomas unspecified histology aggressive | Lymphomas non-Hodgkin's unspecified histology          | Neoplasms benign, malignant and unspecified (incl cysts and polyps) |
| Non-Hodgkin's lymphoma unspecified histology aggressive refractory | Non-Hodgkin's lymphomas unspecified histology aggressive | Lymphomas non-Hodgkin's unspecified histology          | Neoplasms benign, malignant and unspecified (incl cysts and polyps) |
| Non-Hodgkin's lymphoma unspecified histology aggressive stage I    | Non-Hodgkin's lymphomas unspecified histology aggressive | Lymphomas non-Hodgkin's unspecified histology          | Neoplasms benign, malignant and unspecified (incl cysts and polyps) |
| Non-Hodgkin's lymphoma unspecified histology aggressive stage II   | Non-Hodgkin's lymphomas unspecified histology aggressive | Lymphomas non-Hodgkin's unspecified histology          | Neoplasms benign, malignant and unspecified (incl cysts and polyps) |
| Non-Hodgkin's lymphoma unspecified histology aggressive stage III  | Non-Hodgkin's lymphomas unspecified histology aggressive | Lymphomas non-Hodgkin's unspecified histology          | Neoplasms benign, malignant and unspecified (incl cysts and polyps) |
| Non-Hodgkin's lymphoma unspecified histology aggressive stage IV   | Non-Hodgkin's lymphomas unspecified histology aggressive | Lymphomas non-Hodgkin's unspecified histology          | Neoplasms benign, malignant and unspecified (incl cysts and polyps) |



|                                                                 |                                                        |                                                      |                                                                     |
|-----------------------------------------------------------------|--------------------------------------------------------|------------------------------------------------------|---------------------------------------------------------------------|
| Non-Hodgkin's lymphoma unspecified histology indolent stage I   | Non-Hodgkin's lymphomas unspecified histology indolent | Lymphomas non-Hodgkin's unspecified histology        | Neoplasms benign, malignant and unspecified (incl cysts and polyps) |
| Non-Hodgkin's lymphoma unspecified histology indolent stage II  | Non-Hodgkin's lymphomas unspecified histology indolent | Lymphomas non-Hodgkin's unspecified histology        | Neoplasms benign, malignant and unspecified (incl cysts and polyps) |
| Non-Hodgkin's lymphoma unspecified histology indolent stage III | Non-Hodgkin's lymphomas unspecified histology indolent | Lymphomas non-Hodgkin's unspecified histology        | Neoplasms benign, malignant and unspecified (incl cysts and polyps) |
| Non-Hodgkin's lymphoma unspecified histology indolent stage IV  | Non-Hodgkin's lymphomas unspecified histology indolent | Lymphomas non-Hodgkin's unspecified histology        | Neoplasms benign, malignant and unspecified (incl cysts and polyps) |
| Obstructive uropathy                                            | Renal obstructive disorders                            | Renal disorders (excl nephropathies)                 | Renal and urinary disorders                                         |
| Oesophageal adenocarcinoma                                      | Oesophageal neoplasms malignant                        | Gastrointestinal neoplasms malignant and unspecified | Neoplasms benign, malignant and unspecified (incl cysts and polyps) |
| Oesophageal adenocarcinoma recurrent                            | Oesophageal neoplasms malignant                        | Gastrointestinal neoplasms malignant and unspecified | Neoplasms benign, malignant and unspecified (incl cysts and polyps) |
| Oesophageal adenocarcinoma stage 0                              | Oesophageal neoplasms malignant                        | Gastrointestinal neoplasms malignant and unspecified | Neoplasms benign, malignant and unspecified (incl cysts and polyps) |
| Oesophageal adenocarcinoma stage I                              | Oesophageal neoplasms malignant                        | Gastrointestinal neoplasms malignant and unspecified | Neoplasms benign, malignant and unspecified (incl cysts and polyps) |
| Oesophageal adenocarcinoma stage II                             | Oesophageal neoplasms malignant                        | Gastrointestinal neoplasms malignant and unspecified | Neoplasms benign, malignant and unspecified (incl cysts and polyps) |
| Oesophageal adenocarcinoma stage III                            | Oesophageal neoplasms malignant                        | Gastrointestinal neoplasms malignant and unspecified | Neoplasms benign, malignant and unspecified (incl cysts and polyps) |
| Oesophageal adenocarcinoma stage IV                             | Oesophageal neoplasms malignant                        | Gastrointestinal neoplasms malignant and unspecified | Neoplasms benign, malignant and unspecified (incl cysts and polyps) |
| Oesophageal carcinoma                                           | Oesophageal neoplasms malignant                        | Gastrointestinal neoplasms malignant and unspecified | Neoplasms benign, malignant and unspecified (incl cysts and polyps) |
| Oesophageal carcinoma recurrent                                 | Oesophageal neoplasms malignant                        | Gastrointestinal neoplasms malignant and unspecified | Neoplasms benign, malignant and unspecified (incl cysts and polyps) |

|                                               |                                                     |                                                        |                                                                     |
|-----------------------------------------------|-----------------------------------------------------|--------------------------------------------------------|---------------------------------------------------------------------|
| Oesophageal carcinoma stage 0                 | Oesophageal neoplasms malignant                     | Gastrointestinal neoplasms malignant and unspecified   | Neoplasms benign, malignant and unspecified (incl cysts and polyps) |
| Oesophageal squamous cell carcinoma recurrent | Oesophageal neoplasms malignant                     | Gastrointestinal neoplasms malignant and unspecified   | Neoplasms benign, malignant and unspecified (incl cysts and polyps) |
| Oesophageal squamous cell carcinoma stage 0   | Oesophageal neoplasms malignant                     | Gastrointestinal neoplasms malignant and unspecified   | Neoplasms benign, malignant and unspecified (incl cysts and polyps) |
| Oesophageal squamous cell carcinoma stage I   | Oesophageal neoplasms malignant                     | Gastrointestinal neoplasms malignant and unspecified   | Neoplasms benign, malignant and unspecified (incl cysts and polyps) |
| Oesophageal squamous cell carcinoma stage II  | Oesophageal neoplasms malignant                     | Gastrointestinal neoplasms malignant and unspecified   | Neoplasms benign, malignant and unspecified (incl cysts and polyps) |
| Oesophageal squamous cell carcinoma stage III | Oesophageal neoplasms malignant                     | Gastrointestinal neoplasms malignant and unspecified   | Neoplasms benign, malignant and unspecified (incl cysts and polyps) |
| Oesophageal squamous cell carcinoma stage IV  | Oesophageal neoplasms malignant                     | Gastrointestinal neoplasms malignant and unspecified   | Neoplasms benign, malignant and unspecified (incl cysts and polyps) |
| Oesophagectomy                                | Oesophageal therapeutic procedures                  | Gastrointestinal therapeutic procedures                | Surgical and medical procedures                                     |
| Oligodendroglioma                             | Nervous system neoplasms unspecified malignancy NEC | Nervous system neoplasms malignant and unspecified NEC | Neoplasms benign, malignant and unspecified (incl cysts and polyps) |
| Oligodendroglioma benign                      | Gliomas benign                                      | Nervous system neoplasms benign                        | Neoplasms benign, malignant and unspecified (incl cysts and polyps) |
| Omentectomy                                   | Abdominal therapeutic procedures NEC                | Gastrointestinal therapeutic procedures                | Surgical and medical procedures                                     |
| Oophorectomy bilateral                        | Ovarian therapeutic procedures                      | Obstetric and gynaecological therapeutic procedures    | Surgical and medical procedures                                     |
| Oral hairy leukoplakia                        | Epstein-Barr viral infections                       | Viral infectious disorders                             | Infections and infestations                                         |
| Oral neoplasm benign                          | Lip and oral cavity neoplasms benign                | Gastrointestinal neoplasms benign                      | Neoplasms benign, malignant and unspecified (incl cysts and polyps) |
| Orchidectomy                                  | Testicular and scrotal therapeutic procedures       | Male genital tract therapeutic procedures              | Surgical and medical procedures                                     |

|                                       |                                                                                 |                                                                   |                                                                     |
|---------------------------------------|---------------------------------------------------------------------------------|-------------------------------------------------------------------|---------------------------------------------------------------------|
| Oropharyngeal cancer                  | Oropharyngeal, nasopharyngeal and tonsillar neoplasms malignant and unspecified | Respiratory and mediastinal neoplasms malignant and unspecified   | Neoplasms benign, malignant and unspecified (incl cysts and polyps) |
| Oropharyngeal cancer recurrent        | Oropharyngeal, nasopharyngeal and tonsillar neoplasms malignant and unspecified | Respiratory and mediastinal neoplasms malignant and unspecified   | Neoplasms benign, malignant and unspecified (incl cysts and polyps) |
| Oropharyngeal cancer stage 0          | Oropharyngeal, nasopharyngeal and tonsillar neoplasms malignant and unspecified | Respiratory and mediastinal neoplasms malignant and unspecified   | Neoplasms benign, malignant and unspecified (incl cysts and polyps) |
| Oropharyngeal cancer stage I          | Oropharyngeal, nasopharyngeal and tonsillar neoplasms malignant and unspecified | Respiratory and mediastinal neoplasms malignant and unspecified   | Neoplasms benign, malignant and unspecified (incl cysts and polyps) |
| Oropharyngeal cancer stage II         | Oropharyngeal, nasopharyngeal and tonsillar neoplasms malignant and unspecified | Respiratory and mediastinal neoplasms malignant and unspecified   | Neoplasms benign, malignant and unspecified (incl cysts and polyps) |
| Oropharyngeal cancer stage III        | Oropharyngeal, nasopharyngeal and tonsillar neoplasms malignant and unspecified | Respiratory and mediastinal neoplasms malignant and unspecified   | Neoplasms benign, malignant and unspecified (incl cysts and polyps) |
| Oropharyngeal lymphoepithelioma       | Oropharyngeal, nasopharyngeal and tonsillar neoplasms malignant and unspecified | Respiratory and mediastinal neoplasms malignant and unspecified   | Neoplasms benign, malignant and unspecified (incl cysts and polyps) |
| Oropharyngeal neoplasm benign         | Oropharyngeal, nasopharyngeal and tonsillar neoplasms benign                    | Respiratory and mediastinal neoplasms benign (excl mesotheliomas) | Neoplasms benign, malignant and unspecified (incl cysts and polyps) |
| Oropharyngeal squamous cell carcinoma | Oropharyngeal, nasopharyngeal and tonsillar neoplasms malignant and unspecified | Respiratory and mediastinal neoplasms malignant and unspecified   | Neoplasms benign, malignant and unspecified (incl cysts and polyps) |
| Osteoma                               | Bone neoplasms benign (excl cysts)                                              | Skeletal neoplasms benign                                         | Neoplasms benign, malignant and unspecified (incl cysts and polyps) |
| Osteosarcoma                          | Bone sarcomas                                                                   | Skeletal neoplasms malignant and unspecified                      | Neoplasms benign, malignant and unspecified (incl cysts and polyps) |
| Osteosarcoma metastatic               | Bone sarcomas                                                                   | Skeletal neoplasms malignant and unspecified                      | Neoplasms benign, malignant and unspecified (incl cysts and polyps) |
| Osteosarcoma recurrent                | Bone sarcomas                                                                   | Skeletal neoplasms malignant and unspecified                      | Neoplasms benign, malignant and unspecified (incl cysts and polyps) |
| Ovarian cancer                        | Ovarian neoplasms malignant (excl germ cell)                                    | Reproductive neoplasms female malignant and unspecified           | Neoplasms benign, malignant and unspecified (incl cysts and polyps) |

|                                             |                                                |                                                         |                                                                     |
|---------------------------------------------|------------------------------------------------|---------------------------------------------------------|---------------------------------------------------------------------|
| Ovarian cyst                                | Ovarian and fallopian tube cysts and neoplasms | Ovarian and fallopian tube disorders                    | Reproductive system and breast disorders                            |
| Ovarian cyst ruptured                       | Ovarian and fallopian tube cysts and neoplasms | Ovarian and fallopian tube disorders                    | Reproductive system and breast disorders                            |
| Ovarian dysgerminoma stage I                | Ovarian germ cell neoplasms malignant          | Reproductive neoplasms female malignant and unspecified | Neoplasms benign, malignant and unspecified (incl cysts and polyps) |
| Ovarian dysgerminoma stage II               | Ovarian germ cell neoplasms malignant          | Reproductive neoplasms female malignant and unspecified | Neoplasms benign, malignant and unspecified (incl cysts and polyps) |
| Ovarian dysgerminoma stage III              | Ovarian germ cell neoplasms malignant          | Reproductive neoplasms female malignant and unspecified | Neoplasms benign, malignant and unspecified (incl cysts and polyps) |
| Ovarian dysgerminoma stage IV               | Ovarian germ cell neoplasms malignant          | Reproductive neoplasms female malignant and unspecified | Neoplasms benign, malignant and unspecified (incl cysts and polyps) |
| Ovarian epithelial cancer metastatic        | Ovarian neoplasms malignant (excl germ cell)   | Reproductive neoplasms female malignant and unspecified | Neoplasms benign, malignant and unspecified (incl cysts and polyps) |
| Ovarian epithelial cancer recurrent         | Ovarian neoplasms malignant (excl germ cell)   | Reproductive neoplasms female malignant and unspecified | Neoplasms benign, malignant and unspecified (incl cysts and polyps) |
| Ovarian epithelial cancer stage I           | Ovarian neoplasms malignant (excl germ cell)   | Reproductive neoplasms female malignant and unspecified | Neoplasms benign, malignant and unspecified (incl cysts and polyps) |
| Ovarian epithelial cancer stage II          | Ovarian neoplasms malignant (excl germ cell)   | Reproductive neoplasms female malignant and unspecified | Neoplasms benign, malignant and unspecified (incl cysts and polyps) |
| Ovarian epithelial cancer stage III         | Ovarian neoplasms malignant (excl germ cell)   | Reproductive neoplasms female malignant and unspecified | Neoplasms benign, malignant and unspecified (incl cysts and polyps) |
| Ovarian epithelial cancer stage IV          | Ovarian neoplasms malignant (excl germ cell)   | Reproductive neoplasms female malignant and unspecified | Neoplasms benign, malignant and unspecified (incl cysts and polyps) |
| Ovarian germ cell choriocarcinoma stage I   | Ovarian germ cell neoplasms malignant          | Reproductive neoplasms female malignant and unspecified | Neoplasms benign, malignant and unspecified (incl cysts and polyps) |
| Ovarian germ cell choriocarcinoma stage II  | Ovarian germ cell neoplasms malignant          | Reproductive neoplasms female malignant and unspecified | Neoplasms benign, malignant and unspecified (incl cysts and polyps) |
| Ovarian germ cell choriocarcinoma stage III | Ovarian germ cell neoplasms malignant          | Reproductive neoplasms female malignant and             | Neoplasms benign, malignant and                                     |

|                                                     |                                       |                                                         |                                                                     |
|-----------------------------------------------------|---------------------------------------|---------------------------------------------------------|---------------------------------------------------------------------|
|                                                     |                                       | unspecified                                             | unspecified (incl cysts and polyps)                                 |
| Ovarian germ cell choriocarcinoma stage IV          | Ovarian germ cell neoplasms malignant | Reproductive neoplasms female malignant and unspecified | Neoplasms benign, malignant and unspecified (incl cysts and polyps) |
| Ovarian germ cell embryonal carcinoma stage I       | Ovarian germ cell neoplasms malignant | Reproductive neoplasms female malignant and unspecified | Neoplasms benign, malignant and unspecified (incl cysts and polyps) |
| Ovarian germ cell embryonal carcinoma stage II      | Ovarian germ cell neoplasms malignant | Reproductive neoplasms female malignant and unspecified | Neoplasms benign, malignant and unspecified (incl cysts and polyps) |
| Ovarian germ cell embryonal carcinoma stage III     | Ovarian germ cell neoplasms malignant | Reproductive neoplasms female malignant and unspecified | Neoplasms benign, malignant and unspecified (incl cysts and polyps) |
| Ovarian germ cell embryonal carcinoma stage IV      | Ovarian germ cell neoplasms malignant | Reproductive neoplasms female malignant and unspecified | Neoplasms benign, malignant and unspecified (incl cysts and polyps) |
| Ovarian germ cell endodermal sinus tumour stage I   | Ovarian germ cell neoplasms malignant | Reproductive neoplasms female malignant and unspecified | Neoplasms benign, malignant and unspecified (incl cysts and polyps) |
| Ovarian germ cell endodermal sinus tumour stage II  | Ovarian germ cell neoplasms malignant | Reproductive neoplasms female malignant and unspecified | Neoplasms benign, malignant and unspecified (incl cysts and polyps) |
| Ovarian germ cell endodermal sinus tumour stage III | Ovarian germ cell neoplasms malignant | Reproductive neoplasms female malignant and unspecified | Neoplasms benign, malignant and unspecified (incl cysts and polyps) |
| Ovarian germ cell endodermal sinus tumour stage IV  | Ovarian germ cell neoplasms malignant | Reproductive neoplasms female malignant and unspecified | Neoplasms benign, malignant and unspecified (incl cysts and polyps) |
| Ovarian germ cell polyembryoma stage I              | Ovarian germ cell neoplasms malignant | Reproductive neoplasms female malignant and unspecified | Neoplasms benign, malignant and unspecified (incl cysts and polyps) |
| Ovarian germ cell polyembryoma stage II             | Ovarian germ cell neoplasms malignant | Reproductive neoplasms female malignant and unspecified | Neoplasms benign, malignant and unspecified (incl cysts and polyps) |
| Ovarian germ cell polyembryoma stage III            | Ovarian germ cell neoplasms malignant | Reproductive neoplasms female malignant and unspecified | Neoplasms benign, malignant and unspecified (incl cysts and polyps) |
| Ovarian germ cell polyembryoma stage IV             | Ovarian germ cell neoplasms malignant | Reproductive neoplasms female malignant and unspecified | Neoplasms benign, malignant and unspecified (incl cysts and polyps) |

|                                        |                                                                             |                                                                 |                                                                     |
|----------------------------------------|-----------------------------------------------------------------------------|-----------------------------------------------------------------|---------------------------------------------------------------------|
| Ovarian germ cell teratoma benign      | Ovarian neoplasms benign                                                    | Reproductive neoplasms female benign                            | Neoplasms benign, malignant and unspecified (incl cysts and polyps) |
| Ovarian germ cell teratoma stage I     | Ovarian germ cell neoplasms malignant                                       | Reproductive neoplasms female malignant and unspecified         | Neoplasms benign, malignant and unspecified (incl cysts and polyps) |
| Ovarian germ cell teratoma stage II    | Ovarian germ cell neoplasms malignant                                       | Reproductive neoplasms female malignant and unspecified         | Neoplasms benign, malignant and unspecified (incl cysts and polyps) |
| Ovarian germ cell teratoma stage III   | Ovarian germ cell neoplasms malignant                                       | Reproductive neoplasms female malignant and unspecified         | Neoplasms benign, malignant and unspecified (incl cysts and polyps) |
| Ovarian germ cell teratoma stage IV    | Ovarian germ cell neoplasms malignant                                       | Reproductive neoplasms female malignant and unspecified         | Neoplasms benign, malignant and unspecified (incl cysts and polyps) |
| Ovarian low malignant potential tumour | Ovarian neoplasms malignant (excl germ cell)                                | Reproductive neoplasms female malignant and unspecified         | Neoplasms benign, malignant and unspecified (incl cysts and polyps) |
| Paget's disease of nipple              | Breast and nipple neoplasms malignant                                       | Breast neoplasms malignant and unspecified (incl nipple)        | Neoplasms benign, malignant and unspecified (incl cysts and polyps) |
| Paget's disease of penis               | Penile neoplasms malignant                                                  | Reproductive neoplasms male malignant and unspecified           | Neoplasms benign, malignant and unspecified (incl cysts and polyps) |
| Paget's disease of skin                | Skin neoplasms malignant and unspecified (excl melanoma)                    | Skin neoplasms malignant and unspecified                        | Neoplasms benign, malignant and unspecified (incl cysts and polyps) |
| Paget's disease of the vulva           | Vulval neoplasms malignant                                                  | Reproductive neoplasms female malignant and unspecified         | Neoplasms benign, malignant and unspecified (incl cysts and polyps) |
| Pancoast's tumour                      | Respiratory tract and pleural neoplasms malignant cell type unspecified NEC | Respiratory and mediastinal neoplasms malignant and unspecified | Neoplasms benign, malignant and unspecified (incl cysts and polyps) |
| Pancreatotomy                          | Pancreatic therapeutic procedures                                           | Gastrointestinal therapeutic procedures                         | Surgical and medical procedures                                     |
| Pancreatic carcinoma                   | Pancreatic neoplasms malignant (excl islet cell and carcinoid)              | Gastrointestinal neoplasms malignant and unspecified            | Neoplasms benign, malignant and unspecified (incl cysts and polyps) |
| Pancreatic carcinoma metastatic        | Pancreatic neoplasms malignant (excl islet cell and carcinoid)              | Gastrointestinal neoplasms malignant and unspecified            | Neoplasms benign, malignant and unspecified (incl cysts and polyps) |

|                                                               |                                                                      |                                                                 |                                                                     |
|---------------------------------------------------------------|----------------------------------------------------------------------|-----------------------------------------------------------------|---------------------------------------------------------------------|
| Pancreatic carcinoma recurrent                                | Pancreatic neoplasms malignant (excl islet cell and carcinoid)       | Gastrointestinal neoplasms malignant and unspecified            | Neoplasms benign, malignant and unspecified (incl cysts and polyps) |
| Pancreatic cyst                                               | Cystic pancreatic disorders                                          | Exocrine pancreas conditions                                    | Gastrointestinal disorders                                          |
| Pancreaticoduodenectomy                                       | Abdominal therapeutic procedures NEC                                 | Gastrointestinal therapeutic procedures                         | Surgical and medical procedures                                     |
| Papillary serous endometrial carcinoma                        | Endometrial neoplasms malignant                                      | Reproductive neoplasms female malignant and unspecified         | Neoplasms benign, malignant and unspecified (incl cysts and polyps) |
| Papillary thyroid cancer                                      | Thyroid neoplasms malignant                                          | Endocrine neoplasms malignant and unspecified                   | Neoplasms benign, malignant and unspecified (incl cysts and polyps) |
| Papillary tumour of renal pelvis                              | Renal neoplasms benign                                               | Renal and urinary tract neoplasms benign                        | Neoplasms benign, malignant and unspecified (incl cysts and polyps) |
| Papilloma                                                     | Neoplasms benign site unspecified NEC                                | Miscellaneous and site unspecified neoplasms benign             | Neoplasms benign, malignant and unspecified (incl cysts and polyps) |
| Paraganglion neoplasm benign                                  | Endocrine neoplasms benign NEC                                       | Endocrine neoplasms benign                                      | Neoplasms benign, malignant and unspecified (incl cysts and polyps) |
| Paraganglion neoplasm malignant                               | Endocrine neoplasms malignant and unspecified NEC                    | Endocrine neoplasms malignant and unspecified                   | Neoplasms benign, malignant and unspecified (incl cysts and polyps) |
| Paranasal biopsy abnormal                                     | Respiratory tract and thoracic histopathology procedures             | Respiratory and pulmonary investigations (excl blood gases)     | Investigations                                                      |
| Paranasal sinus and nasal cavity malignant neoplasm recurrent | Paranasal sinus and nasal cavity neoplasms malignant and unspecified | Respiratory and mediastinal neoplasms malignant and unspecified | Neoplasms benign, malignant and unspecified (incl cysts and polyps) |
| Paranasal sinus and nasal cavity malignant neoplasm stage 0   | Paranasal sinus and nasal cavity neoplasms malignant and unspecified | Respiratory and mediastinal neoplasms malignant and unspecified | Neoplasms benign, malignant and unspecified (incl cysts and polyps) |
| Paranasal sinus and nasal cavity malignant neoplasm stage I   | Paranasal sinus and nasal cavity neoplasms malignant and unspecified | Respiratory and mediastinal neoplasms malignant and unspecified | Neoplasms benign, malignant and unspecified (incl cysts and polyps) |
| Paranasal sinus and nasal cavity malignant neoplasm stage II  | Paranasal sinus and nasal cavity neoplasms malignant and unspecified | Respiratory and mediastinal neoplasms malignant and unspecified | Neoplasms benign, malignant and unspecified (incl cysts and polyps) |
| Paranasal sinus and nasal cavity malignant neoplasm           | Paranasal sinus and nasal cavity neoplasms malignant                 | Respiratory and mediastinal neoplasms                           | Neoplasms benign, malignant and                                     |

|                                                              |                                                                      |                                                                 |                                                                     |
|--------------------------------------------------------------|----------------------------------------------------------------------|-----------------------------------------------------------------|---------------------------------------------------------------------|
| stage III                                                    | and unspecified                                                      | malignant and unspecified                                       | unspecified (incl cysts and polyps)                                 |
| Paranasal sinus and nasal cavity malignant neoplasm stage IV | Paranasal sinus and nasal cavity neoplasms malignant and unspecified | Respiratory and mediastinal neoplasms malignant and unspecified | Neoplasms benign, malignant and unspecified (incl cysts and polyps) |
| Parapsoriasis                                                | Papulosquamous conditions                                            | Epidermal and dermal conditions                                 | Skin and subcutaneous tissue disorders                              |
| Parathyroid tumour                                           | Endocrine neoplasms malignant and unspecified NEC                    | Endocrine neoplasms malignant and unspecified                   | Neoplasms benign, malignant and unspecified (incl cysts and polyps) |
| Parathyroid tumour benign                                    | Endocrine neoplasms benign NEC                                       | Endocrine neoplasms benign                                      | Neoplasms benign, malignant and unspecified (incl cysts and polyps) |
| Parathyroid tumour malignant                                 | Endocrine neoplasms malignant and unspecified NEC                    | Endocrine neoplasms malignant and unspecified                   | Neoplasms benign, malignant and unspecified (incl cysts and polyps) |
| Parathyroidectomy                                            | Parathyroid gland therapeutic procedures                             | Endocrine gland therapeutic procedures                          | Surgical and medical procedures                                     |
| Parotidectomy                                                | Salivary gland therapeutic procedures                                | Head and neck therapeutic procedures                            | Surgical and medical procedures                                     |
| Pathological fracture                                        | Fractures NEC                                                        | Fractures                                                       | Musculoskeletal and connective tissue disorders                     |
| Penile cancer                                                | Penile neoplasms malignant                                           | Reproductive neoplasms male malignant and unspecified           | Neoplasms benign, malignant and unspecified (incl cysts and polyps) |
| Penile wart                                                  | Reproductive neoplasms male benign NEC                               | Reproductive neoplasms male benign                              | Neoplasms benign, malignant and unspecified (incl cysts and polyps) |
| Penile warts excision                                        | Penile therapeutic procedures                                        | Male genital tract therapeutic procedures                       | Surgical and medical procedures                                     |
| Penis carcinoma metastatic                                   | Penile neoplasms malignant                                           | Reproductive neoplasms male malignant and unspecified           | Neoplasms benign, malignant and unspecified (incl cysts and polyps) |
| Penis carcinoma recurrent                                    | Penile neoplasms malignant                                           | Reproductive neoplasms male malignant and unspecified           | Neoplasms benign, malignant and unspecified (incl cysts and polyps) |
| Penis carcinoma stage I                                      | Penile neoplasms malignant                                           | Reproductive neoplasms male malignant and unspecified           | Neoplasms benign, malignant and unspecified (incl cysts and polyps) |
| Penis carcinoma stage II                                     | Penile neoplasms malignant                                           | Reproductive neoplasms male malignant and                       | Neoplasms benign, malignant and                                     |



|                                                   |                                         |                                                        |                                                                     |
|---------------------------------------------------|-----------------------------------------|--------------------------------------------------------|---------------------------------------------------------------------|
|                                                   |                                         | unspecified                                            | unspecified (incl cysts and polyps)                                 |
| Penis carcinoma stage III                         | Penile neoplasms malignant              | Reproductive neoplasms male malignant and unspecified  | Neoplasms benign, malignant and unspecified (incl cysts and polyps) |
| Penis carcinoma stage IV                          | Penile neoplasms malignant              | Reproductive neoplasms male malignant and unspecified  | Neoplasms benign, malignant and unspecified (incl cysts and polyps) |
| Pericardial mesothelioma malignant recurrent      | Mesotheliomas malignant and unspecified | Mesotheliomas                                          | Neoplasms benign, malignant and unspecified (incl cysts and polyps) |
| Pericarditis malignant                            | Oncologic complications and emergencies | Neoplasm related morbidities                           | Neoplasms benign, malignant and unspecified (incl cysts and polyps) |
| Peripheral nerve sheath tumour malignant          | Nervous system neoplasms malignant NEC  | Nervous system neoplasms malignant and unspecified NEC | Neoplasms benign, malignant and unspecified (incl cysts and polyps) |
| Peripheral neuroepithelioma of bone metastatic    | Bone sarcomas                           | Skeletal neoplasms malignant and unspecified           | Neoplasms benign, malignant and unspecified (incl cysts and polyps) |
| Peripheral neuroepithelioma of bone recurrent     | Bone sarcomas                           | Skeletal neoplasms malignant and unspecified           | Neoplasms benign, malignant and unspecified (incl cysts and polyps) |
| Peripheral T-cell lymphoma unspecified            | Peripheral T-cell lymphomas NEC         | Lymphomas non-Hodgkin's T-cell                         | Neoplasms benign, malignant and unspecified (incl cysts and polyps) |
| Peripheral T-cell lymphoma unspecified recurrent  | Peripheral T-cell lymphomas NEC         | Lymphomas non-Hodgkin's T-cell                         | Neoplasms benign, malignant and unspecified (incl cysts and polyps) |
| Peripheral T-cell lymphoma unspecified refractory | Peripheral T-cell lymphomas NEC         | Lymphomas non-Hodgkin's T-cell                         | Neoplasms benign, malignant and unspecified (incl cysts and polyps) |
| Peripheral T-cell lymphoma unspecified stage I    | Peripheral T-cell lymphomas NEC         | Lymphomas non-Hodgkin's T-cell                         | Neoplasms benign, malignant and unspecified (incl cysts and polyps) |
| Peripheral T-cell lymphoma unspecified stage II   | Peripheral T-cell lymphomas NEC         | Lymphomas non-Hodgkin's T-cell                         | Neoplasms benign, malignant and unspecified (incl cysts and polyps) |
| Peripheral T-cell lymphoma unspecified stage III  | Peripheral T-cell lymphomas NEC         | Lymphomas non-Hodgkin's T-cell                         | Neoplasms benign, malignant and unspecified (incl cysts and polyps) |

|                                                 |                                                      |                                                                   |                                                                     |
|-------------------------------------------------|------------------------------------------------------|-------------------------------------------------------------------|---------------------------------------------------------------------|
| Peripheral T-cell lymphoma unspecified stage IV | Peripheral T-cell lymphomas NEC                      | Lymphomas non-Hodgkin's T-cell                                    | Neoplasms benign, malignant and unspecified (incl cysts and polyps) |
| Peritoneal mesothelioma malignant recurrent     | Mesotheliomas malignant and unspecified              | Mesotheliomas                                                     | Neoplasms benign, malignant and unspecified (incl cysts and polyps) |
| Peutz-Jeghers syndrome                          | Intestinal disorders congenital                      | Gastrointestinal tract disorders congenital                       | Congenital, familial and genetic disorders                          |
| Phaeochromocytoma                               | Islet cell neoplasms and APUDoma NEC                 | Endocrine neoplasms malignant and unspecified                     | Neoplasms benign, malignant and unspecified (incl cysts and polyps) |
| Pharyngeal cancer                               | Pharyngeal neoplasms malignant and unspecified       | Respiratory and mediastinal neoplasms malignant and unspecified   | Neoplasms benign, malignant and unspecified (incl cysts and polyps) |
| Pharyngeal cancer recurrent                     | Pharyngeal neoplasms malignant and unspecified       | Respiratory and mediastinal neoplasms malignant and unspecified   | Neoplasms benign, malignant and unspecified (incl cysts and polyps) |
| Pharyngeal cancer stage 0                       | Pharyngeal neoplasms malignant and unspecified       | Respiratory and mediastinal neoplasms malignant and unspecified   | Neoplasms benign, malignant and unspecified (incl cysts and polyps) |
| Pharyngeal cancer stage I                       | Pharyngeal neoplasms malignant and unspecified       | Respiratory and mediastinal neoplasms malignant and unspecified   | Neoplasms benign, malignant and unspecified (incl cysts and polyps) |
| Pharyngeal cancer stage II                      | Pharyngeal neoplasms malignant and unspecified       | Respiratory and mediastinal neoplasms malignant and unspecified   | Neoplasms benign, malignant and unspecified (incl cysts and polyps) |
| Pharyngeal cancer stage III                     | Pharyngeal neoplasms malignant and unspecified       | Respiratory and mediastinal neoplasms malignant and unspecified   | Neoplasms benign, malignant and unspecified (incl cysts and polyps) |
| Pharyngeal cancer stage IV                      | Pharyngeal neoplasms malignant and unspecified       | Respiratory and mediastinal neoplasms malignant and unspecified   | Neoplasms benign, malignant and unspecified (incl cysts and polyps) |
| Pharyngeal cyst                                 | Pharyngeal disorders (excl infections and neoplasms) | Upper respiratory tract disorders (excl infections)               | Respiratory, thoracic and mediastinal disorders                     |
| Pharyngeal neoplasm benign                      | Pharyngeal and laryngeal neoplasms benign            | Respiratory and mediastinal neoplasms benign (excl mesotheliomas) | Neoplasms benign, malignant and unspecified (incl cysts and polyps) |
| Photon radiation therapy to bladder             | Bladder radiotherapies                               | Renal and urinary tract therapeutic procedures                    | Surgical and medical procedures                                     |
| Photon radiation therapy to bone                | Bone radiotherapies                                  | Bone and joint therapeutic procedures                             | Surgical and medical procedures                                     |

|                                                  |                                                   |                                                              |                                                                     |
|--------------------------------------------------|---------------------------------------------------|--------------------------------------------------------------|---------------------------------------------------------------------|
| Photon radiation therapy to brain                | Brain radiotherapies                              | Nervous system, skull and spine therapeutic procedures       | Surgical and medical procedures                                     |
| Photon radiation therapy to breast               | Breast radiotherapies                             | Breast therapeutic procedures                                | Surgical and medical procedures                                     |
| Photon radiation therapy to colon                | Gastrointestinal radiotherapies                   | Gastrointestinal therapeutic procedures                      | Surgical and medical procedures                                     |
| Photon radiation therapy to ear, nose, or throat | Ear, nose and throat radiotherapies               | Head and neck therapeutic procedures                         | Surgical and medical procedures                                     |
| Photon radiation therapy to lung                 | Pulmonary radiotherapies                          | Respiratory tract therapeutic procedures                     | Surgical and medical procedures                                     |
| Photon radiation therapy to pancreas             | Pancreatic radiotherapies                         | Gastrointestinal therapeutic procedures                      | Surgical and medical procedures                                     |
| Photon radiation therapy to pleura               | Pleural radiation therapies                       | Respiratory tract therapeutic procedures                     | Surgical and medical procedures                                     |
| Photon radiation therapy to prostate             | Prostatic radiotherapies                          | Male genital tract therapeutic procedures                    | Surgical and medical procedures                                     |
| Photon radiation therapy to skin                 | Skin radiotherapies                               | Skin and subcutaneous tissue therapeutic procedures          | Surgical and medical procedures                                     |
| Photon radiation therapy to thyroid              | Thyroid radiotherapies                            | Endocrine gland therapeutic procedures                       | Surgical and medical procedures                                     |
| Photon radiation therapy to uterus               | Uterine radiotherapies                            | Obstetric and gynaecological therapeutic procedures          | Surgical and medical procedures                                     |
| Pineal germinoma                                 | Pineal neoplasms                                  | Nervous system neoplasms malignant and unspecified NEC       | Neoplasms benign, malignant and unspecified (incl cysts and polyps) |
| Pinealoma                                        | Pineal neoplasms                                  | Nervous system neoplasms malignant and unspecified NEC       | Neoplasms benign, malignant and unspecified (incl cysts and polyps) |
| Pineocytoma                                      | Pineal neoplasms                                  | Nervous system neoplasms malignant and unspecified NEC       | Neoplasms benign, malignant and unspecified (incl cysts and polyps) |
| Pituitary tumour                                 | Endocrine neoplasms malignant and unspecified NEC | Endocrine neoplasms malignant and unspecified                | Neoplasms benign, malignant and unspecified (incl cysts and polyps) |
| Placental polyp                                  | Placental abnormalities (excl neoplasms)          | Placental, amniotic and cavity disorders (excl haemorrhages) | Pregnancy, puerperium and perinatal conditions                      |
| Plasma cell leukaemia                            | Plasma cell myelomas                              | Plasma cell neoplasms                                        | Neoplasms benign, malignant and                                     |

|                                              |                                                        |                                                                 |                                                                     |
|----------------------------------------------|--------------------------------------------------------|-----------------------------------------------------------------|---------------------------------------------------------------------|
|                                              |                                                        |                                                                 | unspecified (incl cysts and polyps)                                 |
| Plasma cell myeloma                          | Plasma cell myelomas                                   | Plasma cell neoplasms                                           | Neoplasms benign, malignant and unspecified (incl cysts and polyps) |
| Plasmacytoma                                 | Plasma cell myelomas                                   | Plasma cell neoplasms                                           | Neoplasms benign, malignant and unspecified (incl cysts and polyps) |
| Pleural mesothelioma                         | Mesotheliomas malignant and unspecified                | Mesotheliomas                                                   | Neoplasms benign, malignant and unspecified (incl cysts and polyps) |
| Pleural mesothelioma malignant recurrent     | Mesotheliomas malignant and unspecified                | Mesotheliomas                                                   | Neoplasms benign, malignant and unspecified (incl cysts and polyps) |
| Pleurectomy                                  | Pleural therapeutic procedures                         | Respiratory tract therapeutic procedures                        | Surgical and medical procedures                                     |
| Pneumonectomy                                | Bronchial and pulmonary therapeutic procedures         | Respiratory tract therapeutic procedures                        | Surgical and medical procedures                                     |
| Polycythaemia vera                           | Myeloproliferative disorders (excl leukaemias)         | Haematopoietic neoplasms (excl leukaemias and lymphomas)        | Neoplasms benign, malignant and unspecified (incl cysts and polyps) |
| Polyneuropathy in malignant disease          | Chronic polyneuropathies                               | Peripheral neuropathies                                         | Nervous system disorders                                            |
| Postcricoid cancer                           | Laryngeal neoplasms malignant                          | Respiratory and mediastinal neoplasms malignant and unspecified | Neoplasms benign, malignant and unspecified (incl cysts and polyps) |
| Postmastectomy lymphoedema syndrome          | Reproductive tract and breast procedural complications | Procedural related injuries and complications<br>NEC            | Injury, poisoning and procedural complications                      |
| Precursor B-lymphoblastic lymphoma           | Precursor B-lymphoblastic lymphomas                    | Lymphomas non-Hodgkin's B-cell                                  | Neoplasms benign, malignant and unspecified (incl cysts and polyps) |
| Precursor B-lymphoblastic lymphoma stage I   | Precursor B-lymphoblastic lymphomas                    | Lymphomas non-Hodgkin's B-cell                                  | Neoplasms benign, malignant and unspecified (incl cysts and polyps) |
| Precursor B-lymphoblastic lymphoma stage II  | Precursor B-lymphoblastic lymphomas                    | Lymphomas non-Hodgkin's B-cell                                  | Neoplasms benign, malignant and unspecified (incl cysts and polyps) |
| Precursor B-lymphoblastic lymphoma stage III | Precursor B-lymphoblastic lymphomas                    | Lymphomas non-Hodgkin's B-cell                                  | Neoplasms benign, malignant and unspecified (incl cysts and polyps) |

|                                                         |                                                |                                |                                                                     |
|---------------------------------------------------------|------------------------------------------------|--------------------------------|---------------------------------------------------------------------|
| Precursor B-lymphoblastic lymphoma stage IV             | Precursor B-lymphoblastic lymphomas            | Lymphomas non-Hodgkin's B-cell | Neoplasms benign, malignant and unspecified (incl cysts and polyps) |
| Precursor T-lymphoblastic lymphoma/leukaemia            | Precursor T-lymphoblastic lymphomas/leukaemias | Lymphomas non-Hodgkin's T-cell | Neoplasms benign, malignant and unspecified (incl cysts and polyps) |
| Precursor T-lymphoblastic lymphoma/leukaemia recurrent  | Precursor T-lymphoblastic lymphomas/leukaemias | Lymphomas non-Hodgkin's T-cell | Neoplasms benign, malignant and unspecified (incl cysts and polyps) |
| Precursor T-lymphoblastic lymphoma/leukaemia refractory | Precursor T-lymphoblastic lymphomas/leukaemias | Lymphomas non-Hodgkin's T-cell | Neoplasms benign, malignant and unspecified (incl cysts and polyps) |
| Precursor T-lymphoblastic lymphoma/leukaemia stage I    | Precursor T-lymphoblastic lymphomas/leukaemias | Lymphomas non-Hodgkin's T-cell | Neoplasms benign, malignant and unspecified (incl cysts and polyps) |
| Precursor T-lymphoblastic lymphoma/leukaemia stage II   | Precursor T-lymphoblastic lymphomas/leukaemias | Lymphomas non-Hodgkin's T-cell | Neoplasms benign, malignant and unspecified (incl cysts and polyps) |
| Precursor T-lymphoblastic lymphoma/leukaemia stage III  | Precursor T-lymphoblastic lymphomas/leukaemias | Lymphomas non-Hodgkin's T-cell | Neoplasms benign, malignant and unspecified (incl cysts and polyps) |
| Precursor T-lymphoblastic lymphoma/leukaemia stage IV   | Precursor T-lymphoblastic lymphomas/leukaemias | Lymphomas non-Hodgkin's T-cell | Neoplasms benign, malignant and unspecified (incl cysts and polyps) |
| Primary mediastinal large B-cell lymphoma               | Primary mediastinal large B-cell lymphomas     | Lymphomas non-Hodgkin's B-cell | Neoplasms benign, malignant and unspecified (incl cysts and polyps) |
| Primary mediastinal large B-cell lymphoma recurrent     | Primary mediastinal large B-cell lymphomas     | Lymphomas non-Hodgkin's B-cell | Neoplasms benign, malignant and unspecified (incl cysts and polyps) |
| Primary mediastinal large B-cell lymphoma refractory    | Primary mediastinal large B-cell lymphomas     | Lymphomas non-Hodgkin's B-cell | Neoplasms benign, malignant and unspecified (incl cysts and polyps) |
| Primary mediastinal large B-cell lymphoma stage I       | Primary mediastinal large B-cell lymphomas     | Lymphomas non-Hodgkin's B-cell | Neoplasms benign, malignant and unspecified (incl cysts and polyps) |
| Primary mediastinal large B-cell lymphoma stage II      | Primary mediastinal large B-cell lymphomas     | Lymphomas non-Hodgkin's B-cell | Neoplasms benign, malignant and unspecified (incl cysts and polyps) |
| Primary mediastinal large B-cell lymphoma stage III     | Primary mediastinal large B-cell lymphomas     | Lymphomas non-Hodgkin's B-cell | Neoplasms benign, malignant and unspecified (incl cysts and polyps) |

|                                                    |                                            |                                                       |                                                                     |
|----------------------------------------------------|--------------------------------------------|-------------------------------------------------------|---------------------------------------------------------------------|
| Primary mediastinal large B-cell lymphoma stage IV | Primary mediastinal large B-cell lymphomas | Lymphomas non-Hodgkin's B-cell                        | Neoplasms benign, malignant and unspecified (incl cysts and polyps) |
| Prolactin-producing pituitary tumour               | Hormone secreting pituitary neoplasms      | Endocrine neoplasms malignant and unspecified         | Neoplasms benign, malignant and unspecified (incl cysts and polyps) |
| Prolactinoma                                       | Nervous system neoplasms benign NEC        | Nervous system neoplasms benign                       | Neoplasms benign, malignant and unspecified (incl cysts and polyps) |
| Prolymphocytic leukaemia                           | Leukaemias chronic lymphocytic             | Leukaemias                                            | Neoplasms benign, malignant and unspecified (incl cysts and polyps) |
| Prophylactic chemotherapy                          | Prophylactic procedures NEC                | Therapeutic procedures and supportive care NEC        | Surgical and medical procedures                                     |
| Prostate cancer metastatic                         | Prostatic neoplasms malignant              | Reproductive neoplasms male malignant and unspecified | Neoplasms benign, malignant and unspecified (incl cysts and polyps) |
| Prostate cancer recurrent                          | Prostatic neoplasms malignant              | Reproductive neoplasms male malignant and unspecified | Neoplasms benign, malignant and unspecified (incl cysts and polyps) |
| Prostate cancer stage 0                            | Prostatic neoplasms malignant              | Reproductive neoplasms male malignant and unspecified | Neoplasms benign, malignant and unspecified (incl cysts and polyps) |
| Prostate cancer stage I                            | Prostatic neoplasms malignant              | Reproductive neoplasms male malignant and unspecified | Neoplasms benign, malignant and unspecified (incl cysts and polyps) |
| Prostate cancer stage II                           | Prostatic neoplasms malignant              | Reproductive neoplasms male malignant and unspecified | Neoplasms benign, malignant and unspecified (incl cysts and polyps) |
| Prostate cancer stage III                          | Prostatic neoplasms malignant              | Reproductive neoplasms male malignant and unspecified | Neoplasms benign, malignant and unspecified (incl cysts and polyps) |
| Prostate cancer stage IV                           | Prostatic neoplasms malignant              | Reproductive neoplasms male malignant and unspecified | Neoplasms benign, malignant and unspecified (incl cysts and polyps) |
| Prostatic adenoma                                  | Prostatic neoplasms benign                 | Reproductive neoplasms male benign                    | Neoplasms benign, malignant and unspecified (incl cysts and polyps) |
| Prostatic specific antigen increased               | Cell marker analyses                       | Cytogenetic investigations                            | Investigations                                                      |

|                            |                                                           |                                                                        |                                                                     |
|----------------------------|-----------------------------------------------------------|------------------------------------------------------------------------|---------------------------------------------------------------------|
| Pseudomyxoma peritonei     | Oncologic complications and emergencies                   | Neoplasm related morbidities                                           | Neoplasms benign, malignant and unspecified (incl cysts and polyps) |
| Pyoderma gangrenosum       | Skin and subcutaneous tissue ulcerations                  | Skin and subcutaneous tissue disorders NEC                             | Skin and subcutaneous tissue disorders                              |
| Pyogenic granuloma         | Skin neoplasms benign                                     | Cutaneous neoplasms benign                                             | Neoplasms benign, malignant and unspecified (incl cysts and polyps) |
| Queyrat erythroplasia      | Neoplasms unspecified malignancy and site unspecified NEC | Miscellaneous and site unspecified neoplasms malignant and unspecified | Neoplasms benign, malignant and unspecified (incl cysts and polyps) |
| Radical hysterectomy       | Uterine therapeutic procedures                            | Obstetric and gynaecological therapeutic procedures                    | Surgical and medical procedures                                     |
| Radical mastectomy         | Mastectomies                                              | Breast therapeutic procedures                                          | Surgical and medical procedures                                     |
| Radicular cyst             | Dental disorders NEC                                      | Dental and gingival conditions                                         | Gastrointestinal disorders                                          |
| Radioactive iodine therapy | Thyroid radiotherapies                                    | Endocrine gland therapeutic procedures                                 | Surgical and medical procedures                                     |
| Radiotherapy               | Radiotherapies site unspecified                           | Therapeutic procedures and supportive care NEC                         | Surgical and medical procedures                                     |
| Rectal adenocarcinoma      | Colorectal neoplasms malignant                            | Gastrointestinal neoplasms malignant and unspecified                   | Neoplasms benign, malignant and unspecified (incl cysts and polyps) |
| Rectal cancer              | Colorectal neoplasms malignant                            | Gastrointestinal neoplasms malignant and unspecified                   | Neoplasms benign, malignant and unspecified (incl cysts and polyps) |
| Rectal cancer recurrent    | Colorectal neoplasms malignant                            | Gastrointestinal neoplasms malignant and unspecified                   | Neoplasms benign, malignant and unspecified (incl cysts and polyps) |
| Rectal cancer stage 0      | Colorectal neoplasms malignant                            | Gastrointestinal neoplasms malignant and unspecified                   | Neoplasms benign, malignant and unspecified (incl cysts and polyps) |
| Rectal cancer stage I      | Colorectal neoplasms malignant                            | Gastrointestinal neoplasms malignant and unspecified                   | Neoplasms benign, malignant and unspecified (incl cysts and polyps) |
| Rectal cancer stage II     | Colorectal neoplasms malignant                            | Gastrointestinal neoplasms malignant and unspecified                   | Neoplasms benign, malignant and unspecified (incl cysts and polyps) |

|                                             |                                                      |                                                                        |                                                                     |
|---------------------------------------------|------------------------------------------------------|------------------------------------------------------------------------|---------------------------------------------------------------------|
| Rectal cancer stage III                     | Colorectal neoplasms malignant                       | Gastrointestinal neoplasms malignant and unspecified                   | Neoplasms benign, malignant and unspecified (incl cysts and polyps) |
| Rectal cancer stage IV                      | Colorectal neoplasms malignant                       | Gastrointestinal neoplasms malignant and unspecified                   | Neoplasms benign, malignant and unspecified (incl cysts and polyps) |
| Rectal polyp                                | Benign neoplasms gastrointestinal (excl oral cavity) | Benign neoplasms gastrointestinal                                      | Gastrointestinal disorders                                          |
| Rectal polypectomy                          | Anorectal therapeutic procedures                     | Gastrointestinal therapeutic procedures                                | Surgical and medical procedures                                     |
| Rectosigmoid cancer                         | Colorectal neoplasms malignant                       | Gastrointestinal neoplasms malignant and unspecified                   | Neoplasms benign, malignant and unspecified (incl cysts and polyps) |
| Rectosigmoid cancer recurrent               | Colorectal neoplasms malignant                       | Gastrointestinal neoplasms malignant and unspecified                   | Neoplasms benign, malignant and unspecified (incl cysts and polyps) |
| Rectosigmoid cancer stage 0                 | Colorectal neoplasms malignant                       | Gastrointestinal neoplasms malignant and unspecified                   | Neoplasms benign, malignant and unspecified (incl cysts and polyps) |
| Rectosigmoid cancer stage I                 | Colorectal neoplasms malignant                       | Gastrointestinal neoplasms malignant and unspecified                   | Neoplasms benign, malignant and unspecified (incl cysts and polyps) |
| Rectosigmoid cancer stage II                | Colorectal neoplasms malignant                       | Gastrointestinal neoplasms malignant and unspecified                   | Neoplasms benign, malignant and unspecified (incl cysts and polyps) |
| Rectosigmoid cancer stage III               | Colorectal neoplasms malignant                       | Gastrointestinal neoplasms malignant and unspecified                   | Neoplasms benign, malignant and unspecified (incl cysts and polyps) |
| Rectosigmoid cancer stage IV                | Colorectal neoplasms malignant                       | Gastrointestinal neoplasms malignant and unspecified                   | Neoplasms benign, malignant and unspecified (incl cysts and polyps) |
| Recurrent cancer                            | Neoplasms malignant site unspecified NEC             | Miscellaneous and site unspecified neoplasms malignant and unspecified | Neoplasms benign, malignant and unspecified (incl cysts and polyps) |
| Refractory anaemia with an excess of blasts | Myelodysplastic syndromes                            | Leukaemias                                                             | Neoplasms benign, malignant and unspecified (incl cysts and polyps) |
| Refractory anaemia with ringed sideroblasts | Myelodysplastic syndromes                            | Leukaemias                                                             | Neoplasms benign, malignant and unspecified (incl cysts and polyps) |
| Renal cancer                                | Renal neoplasms malignant                            | Renal and urinary tract neoplasms malignant                            | Neoplasms benign, malignant and                                     |



|                                |                                                    |                                                                   |                                                                     |
|--------------------------------|----------------------------------------------------|-------------------------------------------------------------------|---------------------------------------------------------------------|
|                                |                                                    | and unspecified                                                   | unspecified (incl cysts and polyps)                                 |
| Renal cancer recurrent         | Renal neoplasms malignant                          | Renal and urinary tract neoplasms malignant and unspecified       | Neoplasms benign, malignant and unspecified (incl cysts and polyps) |
| Renal cancer stage I           | Renal neoplasms malignant                          | Renal and urinary tract neoplasms malignant and unspecified       | Neoplasms benign, malignant and unspecified (incl cysts and polyps) |
| Renal cancer stage II          | Renal neoplasms malignant                          | Renal and urinary tract neoplasms malignant and unspecified       | Neoplasms benign, malignant and unspecified (incl cysts and polyps) |
| Renal cancer stage III         | Renal neoplasms malignant                          | Renal and urinary tract neoplasms malignant and unspecified       | Neoplasms benign, malignant and unspecified (incl cysts and polyps) |
| Renal cancer stage IV          | Renal neoplasms malignant                          | Renal and urinary tract neoplasms malignant and unspecified       | Neoplasms benign, malignant and unspecified (incl cysts and polyps) |
| Renal cell carcinoma recurrent | Renal neoplasms malignant                          | Renal and urinary tract neoplasms malignant and unspecified       | Neoplasms benign, malignant and unspecified (incl cysts and polyps) |
| Renal cell carcinoma stage I   | Renal neoplasms malignant                          | Renal and urinary tract neoplasms malignant and unspecified       | Neoplasms benign, malignant and unspecified (incl cysts and polyps) |
| Renal cell carcinoma stage II  | Renal neoplasms malignant                          | Renal and urinary tract neoplasms malignant and unspecified       | Neoplasms benign, malignant and unspecified (incl cysts and polyps) |
| Renal cell carcinoma stage III | Renal neoplasms malignant                          | Renal and urinary tract neoplasms malignant and unspecified       | Neoplasms benign, malignant and unspecified (incl cysts and polyps) |
| Renal cell carcinoma stage IV  | Renal neoplasms malignant                          | Renal and urinary tract neoplasms malignant and unspecified       | Neoplasms benign, malignant and unspecified (incl cysts and polyps) |
| Renal cyst                     | Renal neoplasms                                    | Renal disorders (excl nephropathies)                              | Renal and urinary disorders                                         |
| Renal tumour excision          | Renal therapeutic procedures                       | Renal and urinary tract therapeutic procedures                    | Surgical and medical procedures                                     |
| Resection of rectum            | Anorectal therapeutic procedures                   | Gastrointestinal therapeutic procedures                           | Surgical and medical procedures                                     |
| Respiratory papilloma          | Respiratory tract and pleural neoplasms benign NEC | Respiratory and mediastinal neoplasms benign (excl mesotheliomas) | Neoplasms benign, malignant and unspecified (incl cysts and polyps) |

|                                     |                                                                             |                                                                 |                                                                     |
|-------------------------------------|-----------------------------------------------------------------------------|-----------------------------------------------------------------|---------------------------------------------------------------------|
| Respiratory tract carcinoma in situ | Respiratory tract and pleural neoplasms malignant cell type unspecified NEC | Respiratory and mediastinal neoplasms malignant and unspecified | Neoplasms benign, malignant and unspecified (incl cysts and polyps) |
| Retinal melanoma                    | Ocular melanomas                                                            | Ocular neoplasms                                                | Neoplasms benign, malignant and unspecified (incl cysts and polyps) |
| Retinal tumour excision             | Retinal therapeutic procedures                                              | Eye therapeutic procedures                                      | Surgical and medical procedures                                     |
| Retinoblastoma                      | Ocular neoplasms malignant (excl melanomas)                                 | Ocular neoplasms                                                | Neoplasms benign, malignant and unspecified (incl cysts and polyps) |
| Retro-orbital neoplasm              | Ocular neoplasms malignancy unspecified                                     | Ocular neoplasms                                                | Neoplasms benign, malignant and unspecified (incl cysts and polyps) |
| Retro-pubic prostatectomy           | Prostatic therapeutic procedures                                            | Male genital tract therapeutic procedures                       | Surgical and medical procedures                                     |
| Retroperitoneal cancer              | Gastrointestinal neoplasms malignant NEC                                    | Gastrointestinal neoplasms malignant and unspecified            | Neoplasms benign, malignant and unspecified (incl cysts and polyps) |
| Rhabdoid tumour of the kidney       | Renal neoplasms malignant                                                   | Renal and urinary tract neoplasms malignant and unspecified     | Neoplasms benign, malignant and unspecified (incl cysts and polyps) |
| Rhabdomyoma                         | Soft tissue neoplasms benign NEC                                            | Soft tissue neoplasms benign                                    | Neoplasms benign, malignant and unspecified (incl cysts and polyps) |
| Rhabdomyosarcoma                    | Rhabdomyosarcomas                                                           | Soft tissue neoplasms malignant and unspecified                 | Neoplasms benign, malignant and unspecified (incl cysts and polyps) |
| Rhabdomyosarcoma recurrent          | Rhabdomyosarcomas                                                           | Soft tissue neoplasms malignant and unspecified                 | Neoplasms benign, malignant and unspecified (incl cysts and polyps) |
| Salivary gland cancer recurrent     | Salivary gland neoplasms malignant                                          | Gastrointestinal neoplasms malignant and unspecified            | Neoplasms benign, malignant and unspecified (incl cysts and polyps) |
| Salivary gland cancer stage 0       | Salivary gland neoplasms malignant                                          | Gastrointestinal neoplasms malignant and unspecified            | Neoplasms benign, malignant and unspecified (incl cysts and polyps) |
| Salivary gland cancer stage I       | Salivary gland neoplasms malignant                                          | Gastrointestinal neoplasms malignant and unspecified            | Neoplasms benign, malignant and unspecified (incl cysts and polyps) |
| Salivary gland cancer stage II      | Salivary gland neoplasms malignant                                          | Gastrointestinal neoplasms malignant and                        | Neoplasms benign, malignant and                                     |

|                                  |                                                 |                                                           |                                                                     |
|----------------------------------|-------------------------------------------------|-----------------------------------------------------------|---------------------------------------------------------------------|
|                                  |                                                 | unspecified                                               | unspecified (incl cysts and polyps)                                 |
| Salivary gland cancer stage III  | Salivary gland neoplasms malignant              | Gastrointestinal neoplasms malignant and unspecified      | Neoplasms benign, malignant and unspecified (incl cysts and polyps) |
| Salivary gland cancer stage IV   | Salivary gland neoplasms malignant              | Gastrointestinal neoplasms malignant and unspecified      | Neoplasms benign, malignant and unspecified (incl cysts and polyps) |
| Salivary gland resection         | Salivary gland therapeutic procedures           | Head and neck therapeutic procedures                      | Surgical and medical procedures                                     |
| Salpingectomy                    | Fallopian tube therapeutic procedures           | Obstetric and gynaecological therapeutic procedures       | Surgical and medical procedures                                     |
| Salpingo-oophorectomy            | Fallopian tube therapeutic procedures           | Obstetric and gynaecological therapeutic procedures       | Surgical and medical procedures                                     |
| Salpingo-oophorectomy bilateral  | Fallopian tube therapeutic procedures           | Obstetric and gynaecological therapeutic procedures       | Surgical and medical procedures                                     |
| Salpingo-oophorectomy unilateral | Fallopian tube therapeutic procedures           | Obstetric and gynaecological therapeutic procedures       | Surgical and medical procedures                                     |
| Sarcoma                          | Soft tissue sarcomas histology unspecified      | Soft tissue neoplasms malignant and unspecified           | Neoplasms benign, malignant and unspecified (incl cysts and polyps) |
| Sarcoma excision                 | Therapeutic procedures NEC                      | Therapeutic procedures and supportive care NEC            | Surgical and medical procedures                                     |
| Sarcoma of skin                  | Soft tissue sarcomas histology unspecified      | Soft tissue neoplasms malignant and unspecified           | Neoplasms benign, malignant and unspecified (incl cysts and polyps) |
| Sarcoma uterus                   | Soft tissue sarcomas histology unspecified      | Soft tissue neoplasms malignant and unspecified           | Neoplasms benign, malignant and unspecified (incl cysts and polyps) |
| Sarcomatosis                     | Soft tissue sarcomas histology unspecified      | Soft tissue neoplasms malignant and unspecified           | Neoplasms benign, malignant and unspecified (incl cysts and polyps) |
| Scan gallium abnormal            | Imaging procedures NEC                          | Investigations, imaging and histopathology procedures NEC | Investigations                                                      |
| Schwannoma                       | Nervous system neoplasms unspecified malignancy | Nervous system neoplasms malignant and                    | Neoplasms benign, malignant and                                     |

|                                    |                                                           |                                                                        |                                                                     |
|------------------------------------|-----------------------------------------------------------|------------------------------------------------------------------------|---------------------------------------------------------------------|
|                                    | NEC                                                       | unspecified NEC                                                        | unspecified (incl cysts and polyps)                                 |
| Scrotal cancer                     | Reproductive neoplasms male malignant NEC                 | Reproductive neoplasms male malignant and unspecified                  | Neoplasms benign, malignant and unspecified (incl cysts and polyps) |
| Sebaceous naevus                   | Skin and subcutaneous tissue disorders congenital NEC     | Skin and subcutaneous tissue disorders congenital                      | Congenital, familial and genetic disorders                          |
| Seborrhoeic keratosis              | Skin neoplasms benign                                     | Cutaneous neoplasms benign                                             | Neoplasms benign, malignant and unspecified (incl cysts and polyps) |
| Second primary malignancy          | Neoplasms malignant site unspecified NEC                  | Miscellaneous and site unspecified neoplasms malignant and unspecified | Neoplasms benign, malignant and unspecified (incl cysts and polyps) |
| Secretory adenoma of pituitary     | Nervous system neoplasms unspecified malignancy NEC       | Nervous system neoplasms malignant and unspecified NEC                 | Neoplasms benign, malignant and unspecified (incl cysts and polyps) |
| Seminoma                           | Testicular neoplasms malignant                            | Reproductive neoplasms male malignant and unspecified                  | Neoplasms benign, malignant and unspecified (incl cysts and polyps) |
| Silicon granuloma                  | Skin neoplasms benign                                     | Cutaneous neoplasms benign                                             | Neoplasms benign, malignant and unspecified (incl cysts and polyps) |
| Simple mastectomy                  | Mastectomies                                              | Breast therapeutic procedures                                          | Surgical and medical procedures                                     |
| Sinus polyp                        | Paranasal sinus disorders (excl infections and neoplasms) | Upper respiratory tract disorders (excl infections)                    | Respiratory, thoracic and mediastinal disorders                     |
| Sinus polyp degeneration           | Paranasal sinus disorders (excl infections and neoplasms) | Upper respiratory tract disorders (excl infections)                    | Respiratory, thoracic and mediastinal disorders                     |
| Skin cancer                        | Skin neoplasms malignant and unspecified (excl melanoma)  | Skin neoplasms malignant and unspecified                               | Neoplasms benign, malignant and unspecified (incl cysts and polyps) |
| Skin papilloma                     | Skin neoplasms benign                                     | Cutaneous neoplasms benign                                             | Neoplasms benign, malignant and unspecified (incl cysts and polyps) |
| Small cell carcinoma               | Neoplasms malignant site unspecified NEC                  | Miscellaneous and site unspecified neoplasms malignant and unspecified | Neoplasms benign, malignant and unspecified (incl cysts and polyps) |
| Small cell carcinoma of the cervix | Cervix neoplasms malignant                                | Reproductive neoplasms female malignant and                            | Neoplasms benign, malignant and                                     |

|                                          |                                         |                                                                  |                                                                     |
|------------------------------------------|-----------------------------------------|------------------------------------------------------------------|---------------------------------------------------------------------|
|                                          |                                         | unspecified                                                      | unspecified (incl cysts and polyps)                                 |
| Small cell lung cancer                   | Respiratory tract small cell carcinomas | Respiratory and mediastinal neoplasms malignant and unspecified  | Neoplasms benign, malignant and unspecified (incl cysts and polyps) |
| Small cell lung cancer extensive stage   | Respiratory tract small cell carcinomas | Respiratory and mediastinal neoplasms malignant and unspecified  | Neoplasms benign, malignant and unspecified (incl cysts and polyps) |
| Small cell lung cancer limited stage     | Respiratory tract small cell carcinomas | Respiratory and mediastinal neoplasms malignant and unspecified  | Neoplasms benign, malignant and unspecified (incl cysts and polyps) |
| Small cell lung cancer recurrent         | Respiratory tract small cell carcinomas | Respiratory and mediastinal neoplasms malignant and unspecified  | Neoplasms benign, malignant and unspecified (incl cysts and polyps) |
| Small intestinal resection               | Small intestine therapeutic procedures  | Gastrointestinal therapeutic procedures                          | Surgical and medical procedures                                     |
| Small intestine carcinoma metastatic     | Small intestinal neoplasms malignant    | Gastrointestinal neoplasms malignant and unspecified             | Neoplasms benign, malignant and unspecified (incl cysts and polyps) |
| Small intestine carcinoma recurrent      | Small intestinal neoplasms malignant    | Gastrointestinal neoplasms malignant and unspecified             | Neoplasms benign, malignant and unspecified (incl cysts and polyps) |
| Small intestine leiomyosarcoma           | Leiomyosarcomas                         | Soft tissue neoplasms malignant and unspecified                  | Neoplasms benign, malignant and unspecified (incl cysts and polyps) |
| Somatostatinoma                          | Islet cell neoplasms and APUDoma NEC    | Endocrine neoplasms malignant and unspecified                    | Neoplasms benign, malignant and unspecified (incl cysts and polyps) |
| Spermatocele                             | Scrotal disorders NEC                   | Penile and scrotal disorders (excl infections and inflammations) | Reproductive system and breast disorders                            |
| Spinal meningioma benign                 | Meningiomas benign                      | Nervous system neoplasms benign                                  | Neoplasms benign, malignant and unspecified (incl cysts and polyps) |
| Spinal meningioma malignant              | Meningiomas malignant                   | Nervous system neoplasms malignant and unspecified NEC           | Neoplasms benign, malignant and unspecified (incl cysts and polyps) |
| Splenectomy                              | Lymphoid tissue therapeutic procedures  | Haematological and lymphoid tissue therapeutic procedures        | Surgical and medical procedures                                     |
| Splenic marginal zone lymphoma recurrent | Splenic marginal zone lymphomas         | Lymphomas non-Hodgkin's B-cell                                   | Neoplasms benign, malignant and                                     |

|                                            |                                                                                 |                                                                        |                                                                     |
|--------------------------------------------|---------------------------------------------------------------------------------|------------------------------------------------------------------------|---------------------------------------------------------------------|
|                                            |                                                                                 |                                                                        | unspecified (incl cysts and polyps)                                 |
| Splenic marginal zone lymphoma refractory  | Splenic marginal zone lymphomas                                                 | Lymphomas non-Hodgkin's B-cell                                         | Neoplasms benign, malignant and unspecified (incl cysts and polyps) |
| Splenic marginal zone lymphoma stage I     | Splenic marginal zone lymphomas                                                 | Lymphomas non-Hodgkin's B-cell                                         | Neoplasms benign, malignant and unspecified (incl cysts and polyps) |
| Splenic marginal zone lymphoma stage II    | Splenic marginal zone lymphomas                                                 | Lymphomas non-Hodgkin's B-cell                                         | Neoplasms benign, malignant and unspecified (incl cysts and polyps) |
| Splenic marginal zone lymphoma stage III   | Splenic marginal zone lymphomas                                                 | Lymphomas non-Hodgkin's B-cell                                         | Neoplasms benign, malignant and unspecified (incl cysts and polyps) |
| Splenic marginal zone lymphoma stage IV    | Splenic marginal zone lymphomas                                                 | Lymphomas non-Hodgkin's B-cell                                         | Neoplasms benign, malignant and unspecified (incl cysts and polyps) |
| Squamous cell carcinoma                    | Neoplasms malignant site unspecified NEC                                        | Miscellaneous and site unspecified neoplasms malignant and unspecified | Neoplasms benign, malignant and unspecified (incl cysts and polyps) |
| Squamous cell carcinoma of lung            | Non-small cell neoplasms malignant of the respiratory tract cell type specified | Respiratory and mediastinal neoplasms malignant and unspecified        | Neoplasms benign, malignant and unspecified (incl cysts and polyps) |
| Squamous cell carcinoma of skin            | Skin neoplasms malignant and unspecified (excl melanoma)                        | Skin neoplasms malignant and unspecified                               | Neoplasms benign, malignant and unspecified (incl cysts and polyps) |
| Squamous cell carcinoma of the cervix      | Cervix neoplasms malignant                                                      | Reproductive neoplasms female malignant and unspecified                | Neoplasms benign, malignant and unspecified (incl cysts and polyps) |
| Squamous cell carcinoma of the hypopharynx | Hypopharyngeal neoplasms malignant and unspecified                              | Respiratory and mediastinal neoplasms malignant and unspecified        | Neoplasms benign, malignant and unspecified (incl cysts and polyps) |
| Squamous cell carcinoma of the oral cavity | Lip and oral cavity neoplasms malignant                                         | Gastrointestinal neoplasms malignant and unspecified                   | Neoplasms benign, malignant and unspecified (incl cysts and polyps) |
| Squamous cell carcinoma of the tongue      | Lip and oral cavity neoplasms malignant                                         | Gastrointestinal neoplasms malignant and unspecified                   | Neoplasms benign, malignant and unspecified (incl cysts and polyps) |
| Squamous cell carcinoma of the vagina      | Vaginal neoplasms malignant                                                     | Reproductive neoplasms female malignant and unspecified                | Neoplasms benign, malignant and unspecified (incl cysts and polyps) |

|                                                  |                                                       |                                                                 |                                                                     |
|--------------------------------------------------|-------------------------------------------------------|-----------------------------------------------------------------|---------------------------------------------------------------------|
| Squamous cell carcinoma of the vulva             | Vulval neoplasms malignant                            | Reproductive neoplasms female malignant and unspecified         | Neoplasms benign, malignant and unspecified (incl cysts and polyps) |
| Squamous endometrial carcinoma                   | Endometrial neoplasms malignant                       | Reproductive neoplasms female malignant and unspecified         | Neoplasms benign, malignant and unspecified (incl cysts and polyps) |
| Superficial spreading melanoma stage I           | Skin melanomas (excl ocular)                          | Skin neoplasms malignant and unspecified                        | Neoplasms benign, malignant and unspecified (incl cysts and polyps) |
| Superficial spreading melanoma stage II          | Skin melanomas (excl ocular)                          | Skin neoplasms malignant and unspecified                        | Neoplasms benign, malignant and unspecified (incl cysts and polyps) |
| Superficial spreading melanoma stage III         | Skin melanomas (excl ocular)                          | Skin neoplasms malignant and unspecified                        | Neoplasms benign, malignant and unspecified (incl cysts and polyps) |
| Superficial spreading melanoma stage IV          | Skin melanomas (excl ocular)                          | Skin neoplasms malignant and unspecified                        | Neoplasms benign, malignant and unspecified (incl cysts and polyps) |
| Superficial spreading melanoma stage unspecified | Skin melanomas (excl ocular)                          | Skin neoplasms malignant and unspecified                        | Neoplasms benign, malignant and unspecified (incl cysts and polyps) |
| Superior vena cava syndrome                      | Site specific necrosis and vascular insufficiency NEC | Arteriosclerosis, stenosis, vascular insufficiency and necrosis | Vascular disorders                                                  |
| Suprapubic prostatectomy                         | Prostatic therapeutic procedures                      | Male genital tract therapeutic procedures                       | Surgical and medical procedures                                     |
| Sweat gland tumour                               | Skin neoplasms benign                                 | Cutaneous neoplasms benign                                      | Neoplasms benign, malignant and unspecified (incl cysts and polyps) |
| Synovial cyst                                    | Synovial disorders                                    | Synovial and bursal disorders                                   | Musculoskeletal and connective tissue disorders                     |
| Synovial sarcoma                                 | Soft tissue sarcomas histology unspecified            | Soft tissue neoplasms malignant and unspecified                 | Neoplasms benign, malignant and unspecified (incl cysts and polyps) |
| Synovial sarcoma metastatic                      | Soft tissue sarcomas histology unspecified            | Soft tissue neoplasms malignant and unspecified                 | Neoplasms benign, malignant and unspecified (incl cysts and polyps) |
| Synovial sarcoma recurrent                       | Soft tissue sarcomas histology unspecified            | Soft tissue neoplasms malignant and unspecified                 | Neoplasms benign, malignant and unspecified (incl cysts and polyps) |

|                                           |                                                        |                                                                        |                                                                     |
|-------------------------------------------|--------------------------------------------------------|------------------------------------------------------------------------|---------------------------------------------------------------------|
| T-cell chronic lymphocytic leukaemia      | Leukaemias chronic T-cell                              | Leukaemias                                                             | Neoplasms benign, malignant and unspecified (incl cysts and polyps) |
| T-cell lymphoma                           | Anaplastic large cell lymphomas T- and null-cell types | Lymphomas non-Hodgkin's T-cell                                         | Neoplasms benign, malignant and unspecified (incl cysts and polyps) |
| T-cell lymphoma recurrent                 | Anaplastic large cell lymphomas T- and null-cell types | Lymphomas non-Hodgkin's T-cell                                         | Neoplasms benign, malignant and unspecified (incl cysts and polyps) |
| T-cell lymphoma refractory                | Anaplastic large cell lymphomas T- and null-cell types | Lymphomas non-Hodgkin's T-cell                                         | Neoplasms benign, malignant and unspecified (incl cysts and polyps) |
| T-cell lymphoma stage I                   | Anaplastic large cell lymphomas T- and null-cell types | Lymphomas non-Hodgkin's T-cell                                         | Neoplasms benign, malignant and unspecified (incl cysts and polyps) |
| T-cell lymphoma stage II                  | Anaplastic large cell lymphomas T- and null-cell types | Lymphomas non-Hodgkin's T-cell                                         | Neoplasms benign, malignant and unspecified (incl cysts and polyps) |
| T-cell lymphoma stage III                 | Anaplastic large cell lymphomas T- and null-cell types | Lymphomas non-Hodgkin's T-cell                                         | Neoplasms benign, malignant and unspecified (incl cysts and polyps) |
| T-cell lymphoma stage IV                  | Anaplastic large cell lymphomas T- and null-cell types | Lymphomas non-Hodgkin's T-cell                                         | Neoplasms benign, malignant and unspecified (incl cysts and polyps) |
| T-cell prolymphocytic leukaemia           | Leukaemias chronic T-cell                              | Leukaemias                                                             | Neoplasms benign, malignant and unspecified (incl cysts and polyps) |
| T-cell type acute leukaemia               | Leukaemias acute lymphocytic                           | Leukaemias                                                             | Neoplasms benign, malignant and unspecified (incl cysts and polyps) |
| T-cell unclassifiable lymphoma high grade | T-cell unclassifiable lymphomas                        | Lymphomas non-Hodgkin's T-cell                                         | Neoplasms benign, malignant and unspecified (incl cysts and polyps) |
| T-cell unclassifiable lymphoma low grade  | T-cell unclassifiable lymphomas                        | Lymphomas non-Hodgkin's T-cell                                         | Neoplasms benign, malignant and unspecified (incl cysts and polyps) |
| Teratoma                                  | Germ cell neoplasms site unspecified NEC               | Miscellaneous and site unspecified neoplasms malignant and unspecified | Neoplasms benign, malignant and unspecified (incl cysts and polyps) |
| Testicular choriocarcinoma stage I        | Testicular neoplasms malignant                         | Reproductive neoplasms male malignant and unspecified                  | Neoplasms benign, malignant and unspecified (incl cysts and polyps) |



|                                             |                                |                                                       |                                                                     |
|---------------------------------------------|--------------------------------|-------------------------------------------------------|---------------------------------------------------------------------|
| Testicular choriocarcinoma stage II         | Testicular neoplasms malignant | Reproductive neoplasms male malignant and unspecified | Neoplasms benign, malignant and unspecified (incl cysts and polyps) |
| Testicular choriocarcinoma stage III        | Testicular neoplasms malignant | Reproductive neoplasms male malignant and unspecified | Neoplasms benign, malignant and unspecified (incl cysts and polyps) |
| Testicular embryonal carcinoma stage I      | Testicular neoplasms malignant | Reproductive neoplasms male malignant and unspecified | Neoplasms benign, malignant and unspecified (incl cysts and polyps) |
| Testicular embryonal carcinoma stage II     | Testicular neoplasms malignant | Reproductive neoplasms male malignant and unspecified | Neoplasms benign, malignant and unspecified (incl cysts and polyps) |
| Testicular embryonal carcinoma stage III    | Testicular neoplasms malignant | Reproductive neoplasms male malignant and unspecified | Neoplasms benign, malignant and unspecified (incl cysts and polyps) |
| Testicular germ cell tumour mixed stage I   | Testicular neoplasms malignant | Reproductive neoplasms male malignant and unspecified | Neoplasms benign, malignant and unspecified (incl cysts and polyps) |
| Testicular germ cell tumour mixed stage II  | Testicular neoplasms malignant | Reproductive neoplasms male malignant and unspecified | Neoplasms benign, malignant and unspecified (incl cysts and polyps) |
| Testicular germ cell tumour mixed stage III | Testicular neoplasms malignant | Reproductive neoplasms male malignant and unspecified | Neoplasms benign, malignant and unspecified (incl cysts and polyps) |
| Testicular malignant teratoma stage I       | Testicular neoplasms malignant | Reproductive neoplasms male malignant and unspecified | Neoplasms benign, malignant and unspecified (incl cysts and polyps) |
| Testicular malignant teratoma stage II      | Testicular neoplasms malignant | Reproductive neoplasms male malignant and unspecified | Neoplasms benign, malignant and unspecified (incl cysts and polyps) |
| Testicular malignant teratoma stage III     | Testicular neoplasms malignant | Reproductive neoplasms male malignant and unspecified | Neoplasms benign, malignant and unspecified (incl cysts and polyps) |
| Testicular seminoma (pure) stage I          | Testicular neoplasms malignant | Reproductive neoplasms male malignant and unspecified | Neoplasms benign, malignant and unspecified (incl cysts and polyps) |
| Testicular seminoma (pure) stage II         | Testicular neoplasms malignant | Reproductive neoplasms male malignant and unspecified | Neoplasms benign, malignant and unspecified (incl cysts and polyps) |
| Testicular seminoma (pure) stage III        | Testicular neoplasms malignant | Reproductive neoplasms male malignant and unspecified | Neoplasms benign, malignant and unspecified (incl cysts and polyps) |

|                                                        |                                                                             |                                                                 |                                                                     |
|--------------------------------------------------------|-----------------------------------------------------------------------------|-----------------------------------------------------------------|---------------------------------------------------------------------|
| Testicular teratoma benign                             | Reproductive neoplasms male benign NEC                                      | Reproductive neoplasms male benign                              | Neoplasms benign, malignant and unspecified (incl cysts and polyps) |
| Testicular yolk sac tumour stage I                     | Testicular neoplasms malignant                                              | Reproductive neoplasms male malignant and unspecified           | Neoplasms benign, malignant and unspecified (incl cysts and polyps) |
| Testicular yolk sac tumour stage II                    | Testicular neoplasms malignant                                              | Reproductive neoplasms male malignant and unspecified           | Neoplasms benign, malignant and unspecified (incl cysts and polyps) |
| Testicular yolk sac tumour stage III                   | Testicular neoplasms malignant                                              | Reproductive neoplasms male malignant and unspecified           | Neoplasms benign, malignant and unspecified (incl cysts and polyps) |
| Throat cancer                                          | Respiratory tract and pleural neoplasms malignant cell type unspecified NEC | Respiratory and mediastinal neoplasms malignant and unspecified | Neoplasms benign, malignant and unspecified (incl cysts and polyps) |
| Thymoma                                                | Mediastinal neoplasms malignancy unspecified NEC                            | Respiratory and mediastinal neoplasms malignant and unspecified | Neoplasms benign, malignant and unspecified (incl cysts and polyps) |
| Thymoma malignant recurrent                            | Mediastinal neoplasms malignant                                             | Respiratory and mediastinal neoplasms malignant and unspecified | Neoplasms benign, malignant and unspecified (incl cysts and polyps) |
| Thyroid adenoma                                        | Thyroid neoplasms benign                                                    | Endocrine neoplasms benign                                      | Neoplasms benign, malignant and unspecified (incl cysts and polyps) |
| Thyroid cyst                                           | Thyroid neoplasms                                                           | Thyroid gland disorders                                         | Endocrine disorders                                                 |
| Thyroid electron radiation therapy                     | Thyroid radiotherapies                                                      | Endocrine gland therapeutic procedures                          | Surgical and medical procedures                                     |
| Thyroid neoplasm                                       | Endocrine neoplasms malignant and unspecified NEC                           | Endocrine neoplasms malignant and unspecified                   | Neoplasms benign, malignant and unspecified (incl cysts and polyps) |
| Thyroid stimulating hormone-producing pituitary tumour | Hormone secreting pituitary neoplasms                                       | Endocrine neoplasms malignant and unspecified                   | Neoplasms benign, malignant and unspecified (incl cysts and polyps) |
| Tongue neoplasm benign                                 | Lip and oral cavity neoplasms benign                                        | Gastrointestinal neoplasms benign                               | Neoplasms benign, malignant and unspecified (incl cysts and polyps) |
| Tongue neoplasm malignant stage unspecified            | Lip and oral cavity neoplasms malignant                                     | Gastrointestinal neoplasms malignant and unspecified            | Neoplasms benign, malignant and unspecified (incl cysts and polyps) |
| Tonsil cancer                                          | Oropharyngeal, nasopharyngeal and tonsillar                                 | Respiratory and mediastinal neoplasms                           | Neoplasms benign, malignant and                                     |

|                                                                   |                                                                             |                                                                   |                                                                     |
|-------------------------------------------------------------------|-----------------------------------------------------------------------------|-------------------------------------------------------------------|---------------------------------------------------------------------|
|                                                                   | neoplasms malignant and unspecified                                         | malignant and unspecified                                         | unspecified (incl cysts and polyps)                                 |
| Tonsillar neoplasm benign                                         | Oropharyngeal, nasopharyngeal and tonsillar neoplasms benign                | Respiratory and mediastinal neoplasms benign (excl mesotheliomas) | Neoplasms benign, malignant and unspecified (incl cysts and polyps) |
| Tracheal cancer                                                   | Respiratory tract and pleural neoplasms malignant cell type unspecified NEC | Respiratory and mediastinal neoplasms malignant and unspecified   | Neoplasms benign, malignant and unspecified (incl cysts and polyps) |
| Transitional cell cancer of renal pelvis and ureter metastatic    | Renal pelvis and ureter neoplasms malignant                                 | Renal and urinary tract neoplasms malignant and unspecified       | Neoplasms benign, malignant and unspecified (incl cysts and polyps) |
| Transitional cell cancer of the renal pelvis and ureter           | Renal pelvis and ureter neoplasms malignant                                 | Renal and urinary tract neoplasms malignant and unspecified       | Neoplasms benign, malignant and unspecified (incl cysts and polyps) |
| Transitional cell cancer of the renal pelvis and ureter localised | Renal pelvis and ureter neoplasms malignant                                 | Renal and urinary tract neoplasms malignant and unspecified       | Neoplasms benign, malignant and unspecified (incl cysts and polyps) |
| Transitional cell cancer of the renal pelvis and ureter recurrent | Renal pelvis and ureter neoplasms malignant                                 | Renal and urinary tract neoplasms malignant and unspecified       | Neoplasms benign, malignant and unspecified (incl cysts and polyps) |
| Transitional cell cancer of the renal pelvis and ureter regional  | Renal pelvis and ureter neoplasms malignant                                 | Renal and urinary tract neoplasms malignant and unspecified       | Neoplasms benign, malignant and unspecified (incl cysts and polyps) |
| Transitional cell carcinoma                                       | Urinary tract neoplasms malignant NEC                                       | Renal and urinary tract neoplasms malignant and unspecified       | Neoplasms benign, malignant and unspecified (incl cysts and polyps) |
| Transitional cell carcinoma urethra                               | Urinary tract neoplasms malignant NEC                                       | Renal and urinary tract neoplasms malignant and unspecified       | Neoplasms benign, malignant and unspecified (incl cysts and polyps) |
| Transurethral prostatectomy                                       | Prostatic therapeutic procedures                                            | Male genital tract therapeutic procedures                         | Surgical and medical procedures                                     |
| Tumour embolism                                                   | Oncologic complications and emergencies                                     | Neoplasm related morbidities                                      | Neoplasms benign, malignant and unspecified (incl cysts and polyps) |
| Tumour flare                                                      | Oncologic complications and emergencies                                     | Neoplasm related morbidities                                      | Neoplasms benign, malignant and unspecified (incl cysts and polyps) |
| Tumour lysis syndrome                                             | Electrolyte imbalance NEC                                                   | Electrolyte and fluid balance conditions                          | Metabolism and nutrition disorders                                  |
| Tumour pain                                                       | Oncologic complications and emergencies                                     | Neoplasm related morbidities                                      | Neoplasms benign, malignant and unspecified (incl cysts and polyps) |

|                                 |                                                  |                                                                      |                                                                     |
|---------------------------------|--------------------------------------------------|----------------------------------------------------------------------|---------------------------------------------------------------------|
| Ultrasound scan vagina abnormal | Reproductive organ and breast imaging procedures | Reproductive organ and breast investigations (excl hormone analyses) | Investigations                                                      |
| Undifferentiated sarcoma        | Soft tissue sarcomas histology unspecified       | Soft tissue neoplasms malignant and unspecified                      | Neoplasms benign, malignant and unspecified (incl cysts and polyps) |
| Ureteric cancer                 | Renal pelvis and ureter neoplasms malignant      | Renal and urinary tract neoplasms malignant and unspecified          | Neoplasms benign, malignant and unspecified (incl cysts and polyps) |
| Ureteric cancer local           | Renal pelvis and ureter neoplasms malignant      | Renal and urinary tract neoplasms malignant and unspecified          | Neoplasms benign, malignant and unspecified (incl cysts and polyps) |
| Ureteric cancer metastatic      | Renal pelvis and ureter neoplasms malignant      | Renal and urinary tract neoplasms malignant and unspecified          | Neoplasms benign, malignant and unspecified (incl cysts and polyps) |
| Ureteric cancer recurrent       | Renal pelvis and ureter neoplasms malignant      | Renal and urinary tract neoplasms malignant and unspecified          | Neoplasms benign, malignant and unspecified (incl cysts and polyps) |
| Ureteric cancer regional        | Renal pelvis and ureter neoplasms malignant      | Renal and urinary tract neoplasms malignant and unspecified          | Neoplasms benign, malignant and unspecified (incl cysts and polyps) |
| Urethral cancer                 | Urinary tract neoplasms malignant NEC            | Renal and urinary tract neoplasms malignant and unspecified          | Neoplasms benign, malignant and unspecified (incl cysts and polyps) |
| Urethral cancer metastatic      | Urinary tract neoplasms malignant NEC            | Renal and urinary tract neoplasms malignant and unspecified          | Neoplasms benign, malignant and unspecified (incl cysts and polyps) |
| Urethral cancer recurrent       | Urinary tract neoplasms malignant NEC            | Renal and urinary tract neoplasms malignant and unspecified          | Neoplasms benign, malignant and unspecified (incl cysts and polyps) |
| Urethral papilloma              | Urinary tract neoplasms benign                   | Renal and urinary tract neoplasms benign                             | Neoplasms benign, malignant and unspecified (incl cysts and polyps) |
| Urinary cystectomy              | Bladder therapeutic procedures                   | Renal and urinary tract therapeutic procedures                       | Surgical and medical procedures                                     |
| Uterine cancer                  | Uterine neoplasms malignant NEC                  | Reproductive neoplasms female malignant and unspecified              | Neoplasms benign, malignant and unspecified (incl cysts and polyps) |
| Uterine carcinoma in situ       | Uterine neoplasms malignant NEC                  | Reproductive neoplasms female malignant and unspecified              | Neoplasms benign, malignant and unspecified (incl cysts and polyps) |

|                           |                                                      |                                                            |                                                                     |
|---------------------------|------------------------------------------------------|------------------------------------------------------------|---------------------------------------------------------------------|
| Uterine leiomyoma         | Uterine neoplasms benign                             | Reproductive neoplasms female benign                       | Neoplasms benign, malignant and unspecified (incl cysts and polyps) |
| Uterine leiomyosarcoma    | Leiomyosarcomas                                      | Soft tissue neoplasms malignant and unspecified            | Neoplasms benign, malignant and unspecified (incl cysts and polyps) |
| Uterine neoplasm          | Female reproductive neoplasms unspecified malignancy | Reproductive neoplasms female malignant and unspecified    | Neoplasms benign, malignant and unspecified (incl cysts and polyps) |
| Uterine polyp             | Uterine neoplasms                                    | Uterine, pelvic and broad ligament disorders               | Reproductive system and breast disorders                            |
| Vaginal cancer            | Vaginal neoplasms malignant                          | Reproductive neoplasms female malignant and unspecified    | Neoplasms benign, malignant and unspecified (incl cysts and polyps) |
| Vaginal cancer metastatic | Vaginal neoplasms malignant                          | Reproductive neoplasms female malignant and unspecified    | Neoplasms benign, malignant and unspecified (incl cysts and polyps) |
| Vaginal cancer recurrent  | Vaginal neoplasms malignant                          | Reproductive neoplasms female malignant and unspecified    | Neoplasms benign, malignant and unspecified (incl cysts and polyps) |
| Vaginal cancer stage 0    | Vaginal neoplasms malignant                          | Reproductive neoplasms female malignant and unspecified    | Neoplasms benign, malignant and unspecified (incl cysts and polyps) |
| Vaginal cancer stage I    | Vaginal neoplasms malignant                          | Reproductive neoplasms female malignant and unspecified    | Neoplasms benign, malignant and unspecified (incl cysts and polyps) |
| Vaginal cancer stage II   | Vaginal neoplasms malignant                          | Reproductive neoplasms female malignant and unspecified    | Neoplasms benign, malignant and unspecified (incl cysts and polyps) |
| Vaginal cancer stage III  | Vaginal neoplasms malignant                          | Reproductive neoplasms female malignant and unspecified    | Neoplasms benign, malignant and unspecified (incl cysts and polyps) |
| Vaginal cancer stage IVA  | Vaginal neoplasms malignant                          | Reproductive neoplasms female malignant and unspecified    | Neoplasms benign, malignant and unspecified (incl cysts and polyps) |
| Vaginal cancer stage IVB  | Vaginal neoplasms malignant                          | Reproductive neoplasms female malignant and unspecified    | Neoplasms benign, malignant and unspecified (incl cysts and polyps) |
| Vaginal cyst              | Vulvovaginal cysts and neoplasms                     | Vulvovaginal disorders (excl infections and inflammations) | Reproductive system and breast disorders                            |

|                          |                                                                            |                                                            |                                                                     |
|--------------------------|----------------------------------------------------------------------------|------------------------------------------------------------|---------------------------------------------------------------------|
| Vaginal dysplasia        | Vulvovaginal disorders NEC                                                 | Vulvovaginal disorders (excl infections and inflammations) | Reproductive system and breast disorders                            |
| Vaginal polyp            | Vulvovaginal cysts and neoplasms                                           | Vulvovaginal disorders (excl infections and inflammations) | Reproductive system and breast disorders                            |
| Vipoma                   | Islet cell neoplasms and APUDoma NEC                                       | Endocrine neoplasms malignant and unspecified              | Neoplasms benign, malignant and unspecified (incl cysts and polyps) |
| Vocal cord polyp         | Laryngeal and adjacent sites disorders NEC (excl infections and neoplasms) | Upper respiratory tract disorders (excl infections)        | Respiratory, thoracic and mediastinal disorders                     |
| Vulval cancer            | Vulval neoplasms malignant                                                 | Reproductive neoplasms female malignant and unspecified    | Neoplasms benign, malignant and unspecified (incl cysts and polyps) |
| Vulval cancer metastatic | Vulval neoplasms malignant                                                 | Reproductive neoplasms female malignant and unspecified    | Neoplasms benign, malignant and unspecified (incl cysts and polyps) |
| Vulval cancer recurrent  | Vulval neoplasms malignant                                                 | Reproductive neoplasms female malignant and unspecified    | Neoplasms benign, malignant and unspecified (incl cysts and polyps) |
| Vulval cancer stage 0    | Vulval neoplasms malignant                                                 | Reproductive neoplasms female malignant and unspecified    | Neoplasms benign, malignant and unspecified (incl cysts and polyps) |
| Vulval cancer stage I    | Vulval neoplasms malignant                                                 | Reproductive neoplasms female malignant and unspecified    | Neoplasms benign, malignant and unspecified (incl cysts and polyps) |
| Vulval cancer stage II   | Vulval neoplasms malignant                                                 | Reproductive neoplasms female malignant and unspecified    | Neoplasms benign, malignant and unspecified (incl cysts and polyps) |
| Vulval cancer stage III  | Vulval neoplasms malignant                                                 | Reproductive neoplasms female malignant and unspecified    | Neoplasms benign, malignant and unspecified (incl cysts and polyps) |
| Vulval cancer stage IV   | Vulval neoplasms malignant                                                 | Reproductive neoplasms female malignant and unspecified    | Neoplasms benign, malignant and unspecified (incl cysts and polyps) |
| Vulval polyp             | Vulvovaginal cysts and neoplasms                                           | Vulvovaginal disorders (excl infections and inflammations) | Reproductive system and breast disorders                            |
| Vulval warts removal     | External female genital therapeutic procedures                             | Obstetric and gynaecological therapeutic procedures        | Surgical and medical procedures                                     |

|                                             |                                                |                                                        |                                                                     |
|---------------------------------------------|------------------------------------------------|--------------------------------------------------------|---------------------------------------------------------------------|
| Vulvectomy                                  | External female genital therapeutic procedures | Obstetric and gynaecological therapeutic procedures    | Surgical and medical procedures                                     |
| Waldenstrom's macroglobulinaemia            | Waldenstrom's macroglobulinaemias              | Lymphomas non-Hodgkin's B-cell                         | Neoplasms benign, malignant and unspecified (incl cysts and polyps) |
| Waldenstrom's macroglobulinaemia recurrent  | Waldenstrom's macroglobulinaemias              | Lymphomas non-Hodgkin's B-cell                         | Neoplasms benign, malignant and unspecified (incl cysts and polyps) |
| Waldenstrom's macroglobulinaemia refractory | Waldenstrom's macroglobulinaemias              | Lymphomas non-Hodgkin's B-cell                         | Neoplasms benign, malignant and unspecified (incl cysts and polyps) |
| Waldenstrom's macroglobulinaemia stage I    | Waldenstrom's macroglobulinaemias              | Lymphomas non-Hodgkin's B-cell                         | Neoplasms benign, malignant and unspecified (incl cysts and polyps) |
| Waldenstrom's macroglobulinaemia stage II   | Waldenstrom's macroglobulinaemias              | Lymphomas non-Hodgkin's B-cell                         | Neoplasms benign, malignant and unspecified (incl cysts and polyps) |
| Waldenstrom's macroglobulinaemia stage III  | Waldenstrom's macroglobulinaemias              | Lymphomas non-Hodgkin's B-cell                         | Neoplasms benign, malignant and unspecified (incl cysts and polyps) |
| Waldenstrom's macroglobulinaemia stage IV   | Waldenstrom's macroglobulinaemias              | Lymphomas non-Hodgkin's B-cell                         | Neoplasms benign, malignant and unspecified (incl cysts and polyps) |
| X-ray therapy to bladder                    | Bladder radiotherapies                         | Renal and urinary tract therapeutic procedures         | Surgical and medical procedures                                     |
| X-ray therapy to bone                       | Bone radiotherapies                            | Bone and joint therapeutic procedures                  | Surgical and medical procedures                                     |
| X-ray therapy to brain                      | Brain radiotherapies                           | Nervous system, skull and spine therapeutic procedures | Surgical and medical procedures                                     |
| X-ray therapy to breast                     | Breast radiotherapies                          | Breast therapeutic procedures                          | Surgical and medical procedures                                     |
| X-ray therapy to colon                      | Gastrointestinal radiotherapies                | Gastrointestinal therapeutic procedures                | Surgical and medical procedures                                     |
| X-ray therapy to ear, nose, or throat       | Ear, nose and throat radiotherapies            | Head and neck therapeutic procedures                   | Surgical and medical procedures                                     |
| X-ray therapy to lung                       | Pulmonary radiotherapies                       | Respiratory tract therapeutic procedures               | Surgical and medical procedures                                     |
| X-ray therapy to pancreas                   | Pancreatic radiotherapies                      | Gastrointestinal therapeutic procedures                | Surgical and medical procedures                                     |

|                                       |                                                         |                                                                        |                                                                     |
|---------------------------------------|---------------------------------------------------------|------------------------------------------------------------------------|---------------------------------------------------------------------|
| X-ray therapy to pleura               | Pleural radiation therapies                             | Respiratory tract therapeutic procedures                               | Surgical and medical procedures                                     |
| X-ray therapy to prostate             | Prostatic radiotherapies                                | Male genital tract therapeutic procedures                              | Surgical and medical procedures                                     |
| X-ray therapy to skin                 | Skin radiotherapies                                     | Skin and subcutaneous tissue therapeutic procedures                    | Surgical and medical procedures                                     |
| X-ray therapy to thyroid              | Thyroid radiotherapies                                  | Endocrine gland therapeutic procedures                                 | Surgical and medical procedures                                     |
| X-ray therapy to uterus               | Uterine radiotherapies                                  | Obstetric and gynaecological therapeutic procedures                    | Surgical and medical procedures                                     |
| X-ray treatment                       | Radiotherapies site unspecified                         | Therapeutic procedures and supportive care NEC                         | Surgical and medical procedures                                     |
| Yolk sac tumour site unspecified      | Germ cell neoplasms site unspecified NEC                | Miscellaneous and site unspecified neoplasms malignant and unspecified | Neoplasms benign, malignant and unspecified (incl cysts and polyps) |
| Endometrial stromal sarcoma           | Endometrial neoplasms malignant                         | Reproductive neoplasms female malignant and unspecified                | Neoplasms benign, malignant and unspecified (incl cysts and polyps) |
| Teratoma benign                       | Neoplasms benign site unspecified NEC                   | Miscellaneous and site unspecified neoplasms benign                    | Neoplasms benign, malignant and unspecified (incl cysts and polyps) |
| Biopsy prostate abnormal              | Reproductive organ and breast histopathology procedures | Reproductive organ and breast investigations (excl hormone analyses)   | Investigations                                                      |
| Biopsy chorionic villous abnormal     | Reproductive organ and breast histopathology procedures | Reproductive organ and breast investigations (excl hormone analyses)   | Investigations                                                      |
| Chemotherapy extravasation management | Chemotherapies                                          | Therapeutic procedures and supportive care NEC                         | Surgical and medical procedures                                     |
| Intestinal polyp                      | Benign neoplasms gastrointestinal (excl oral cavity)    | Benign neoplasms gastrointestinal                                      | Gastrointestinal disorders                                          |
| Tumour marker increased               | Cell marker analyses                                    | Cytogenetic investigations                                             | Investigations                                                      |
| Pericardial effusion malignant        | Oncologic complications and emergencies                 | Neoplasm related morbidities                                           | Neoplasms benign, malignant and unspecified (incl cysts and polyps) |
| Lymphocele                            | Lymphangiopathies                                       | Lymphatic vessel disorders                                             | Vascular disorders                                                  |



|                                 |                                                       |                                                     |                                                                     |
|---------------------------------|-------------------------------------------------------|-----------------------------------------------------|---------------------------------------------------------------------|
| Infantile septic granulomatosis | Infections congenital NEC                             | Infections and infestations congenital              | Congenital, familial and genetic disorders                          |
| Phakomatosis                    | Congenital disorders NEC                              | Congenital and hereditary disorders NEC             | Congenital, familial and genetic disorders                          |
| Oncocytoma                      | Neoplasms benign site unspecified NEC                 | Miscellaneous and site unspecified neoplasms benign | Neoplasms benign, malignant and unspecified (incl cysts and polyps) |
| Breast calcifications           | Breast disorders NEC                                  | Breast disorders                                    | Reproductive system and breast disorders                            |
| Cancer hormonal therapy         | Hormonal therapeutic procedures NEC                   | Endocrine gland therapeutic procedures              | Surgical and medical procedures                                     |
| Congenital choroid plexus cyst  | Cerebral disorders congenital                         | Neurological disorders congenital                   | Congenital, familial and genetic disorders                          |
| Cerebral haemangioma            | Nervous system neoplasms benign NEC                   | Nervous system neoplasms benign                     | Neoplasms benign, malignant and unspecified (incl cysts and polyps) |
| Biliary adenoma                 | Hepatobiliary neoplasms benign                        | Hepatic and biliary neoplasms benign                | Neoplasms benign, malignant and unspecified (incl cysts and polyps) |
| Rectal adenoma                  | Lower gastrointestinal neoplasms benign               | Gastrointestinal neoplasms benign                   | Neoplasms benign, malignant and unspecified (incl cysts and polyps) |
| Colon adenoma                   | Lower gastrointestinal neoplasms benign               | Gastrointestinal neoplasms benign                   | Neoplasms benign, malignant and unspecified (incl cysts and polyps) |
| Intraosseous angioma            | Bone neoplasms unspecified malignancy                 | Skeletal neoplasms malignant and unspecified        | Neoplasms benign, malignant and unspecified (incl cysts and polyps) |
| Testicular cyst                 | Testicular and epididymal neoplasms                   | Testicular and epididymal disorders                 | Reproductive system and breast disorders                            |
| Osteoma cutis                   | Skin neoplasms benign                                 | Cutaneous neoplasms benign                          | Neoplasms benign, malignant and unspecified (incl cysts and polyps) |
| Steatocystoma multiplex         | Skin and subcutaneous tissue disorders congenital NEC | Skin and subcutaneous tissue disorders congenital   | Congenital, familial and genetic disorders                          |
| Congenital cerebral haemangioma | Cerebral disorders congenital                         | Neurological disorders congenital                   | Congenital, familial and genetic disorders                          |
| Uterine cyst                    | Uterine neoplasms                                     | Uterine, pelvic and broad ligament disorders        | Reproductive system and breast disorders                            |
| Angiolipoma                     | Soft tissue neoplasms benign NEC                      | Soft tissue neoplasms benign                        | Neoplasms benign, malignant and                                     |

|                                         |                                                      |                                                           |                                                                     |
|-----------------------------------------|------------------------------------------------------|-----------------------------------------------------------|---------------------------------------------------------------------|
|                                         |                                                      |                                                           | unspecified (incl cysts and polyps)                                 |
| Lymphadenectomy                         | Lymphoid tissue therapeutic procedures               | Haematological and lymphoid tissue therapeutic procedures | Surgical and medical procedures                                     |
| Ovarian adenoma                         | Ovarian neoplasms benign                             | Reproductive neoplasms female benign                      | Neoplasms benign, malignant and unspecified (incl cysts and polyps) |
| Arachnoid cyst                          | Nervous system cysts and polyps                      | Nervous system neoplasms benign                           | Nervous system disorders                                            |
| Spindle cell sarcoma                    | Soft tissue sarcomas histology unspecified           | Soft tissue neoplasms malignant and unspecified           | Neoplasms benign, malignant and unspecified (incl cysts and polyps) |
| Chemotherapy cytokine prophylaxis       | Prophylactic procedures NEC                          | Therapeutic procedures and supportive care NEC            | Surgical and medical procedures                                     |
| Hysterosalpingo-oophorectomy            | Uterine therapeutic procedures                       | Obstetric and gynaecological therapeutic procedures       | Surgical and medical procedures                                     |
| Pharyngeal mass                         | Pharyngeal disorders (excl infections and neoplasms) | Upper respiratory tract disorders (excl infections)       | Respiratory, thoracic and mediastinal disorders                     |
| Precancerous skin lesion                | Skin preneoplastic conditions NEC                    | Cornification and dystrophic skin disorders               | Skin and subcutaneous tissue disorders                              |
| Fibromatosis                            | Soft tissue neoplasms benign NEC                     | Soft tissue neoplasms benign                              | Neoplasms benign, malignant and unspecified (incl cysts and polyps) |
| Urethral cyst                           | Urethral neoplasms                                   | Urethral disorders (excl calculi)                         | Renal and urinary disorders                                         |
| Tissue polypeptide antigen increased    | Cell marker analyses                                 | Cytogenetic investigations                                | Investigations                                                      |
| Bone marrow tumour cell infiltration    | Haematologic neoplasms NEC                           | Haematopoietic neoplasms (excl leukaemias and lymphomas)  | Neoplasms benign, malignant and unspecified (incl cysts and polyps) |
| Bone marrow leukaemic cell infiltration | Haematologic neoplasms NEC                           | Haematopoietic neoplasms (excl leukaemias and lymphomas)  | Neoplasms benign, malignant and unspecified (incl cysts and polyps) |
| Lymphohistiocytosis                     | Histiocytoses                                        | Haematopoietic neoplasms (excl leukaemias and lymphomas)  | Neoplasms benign, malignant and unspecified (incl cysts and polyps) |
| Adrenal cyst                            | Adrenal neoplasms                                    | Adrenal gland disorders                                   | Endocrine disorders                                                 |

|                               |                                                |                                              |                                                                     |
|-------------------------------|------------------------------------------------|----------------------------------------------|---------------------------------------------------------------------|
| Ovarian cyst torsion          | Ovarian and fallopian tube cysts and neoplasms | Ovarian and fallopian tube disorders         | Reproductive system and breast disorders                            |
| Endometrial dysplasia         | Uterine disorders NEC                          | Uterine, pelvic and broad ligament disorders | Reproductive system and breast disorders                            |
| Gallbladder polyp             | Gallbladder disorders NEC                      | Gallbladder disorders                        | Hepatobiliary disorders                                             |
| Metastases to heart           | Metastases to specified sites                  | Metastases                                   | Neoplasms benign, malignant and unspecified (incl cysts and polyps) |
| Metastases to stomach         | Metastases to specified sites                  | Metastases                                   | Neoplasms benign, malignant and unspecified (incl cysts and polyps) |
| Metastases to pancreas        | Metastases to specified sites                  | Metastases                                   | Neoplasms benign, malignant and unspecified (incl cysts and polyps) |
| Metastases to bladder         | Metastases to specified sites                  | Metastases                                   | Neoplasms benign, malignant and unspecified (incl cysts and polyps) |
| Metastases to thyroid         | Metastases to specified sites                  | Metastases                                   | Neoplasms benign, malignant and unspecified (incl cysts and polyps) |
| Metastases to eye             | Metastases to specified sites                  | Metastases                                   | Neoplasms benign, malignant and unspecified (incl cysts and polyps) |
| Metastases to placenta        | Metastases to specified sites                  | Metastases                                   | Neoplasms benign, malignant and unspecified (incl cysts and polyps) |
| Metastases to uterus          | Metastases to specified sites                  | Metastases                                   | Neoplasms benign, malignant and unspecified (incl cysts and polyps) |
| Metastases to fallopian tube  | Metastases to specified sites                  | Metastases                                   | Neoplasms benign, malignant and unspecified (incl cysts and polyps) |
| Metastases to pituitary gland | Metastases to specified sites                  | Metastases                                   | Neoplasms benign, malignant and unspecified (incl cysts and polyps) |
| Metastases to muscle          | Metastases to specified sites                  | Metastases                                   | Neoplasms benign, malignant and unspecified (incl cysts and polyps) |
| Tumour haemorrhage            | Oncologic complications and emergencies        | Neoplasm related morbidities                 | Neoplasms benign, malignant and unspecified (incl cysts and polyps) |

|                                       |                                                                             |                                                                 |                                                                     |
|---------------------------------------|-----------------------------------------------------------------------------|-----------------------------------------------------------------|---------------------------------------------------------------------|
| Neonatal neuroblastoma                | Nervous system neoplasms malignant NEC                                      | Nervous system neoplasms malignant and unspecified NEC          | Neoplasms benign, malignant and unspecified (incl cysts and polyps) |
| Urinary bladder polyp                 | Bladder neoplasms                                                           | Bladder and bladder neck disorders (excl calculi)               | Renal and urinary disorders                                         |
| Renal cyst ruptured                   | Renal structural abnormalities and trauma                                   | Renal disorders (excl nephropathies)                            | Renal and urinary disorders                                         |
| Lung cancer metastatic                | Respiratory tract and pleural neoplasms malignant cell type unspecified NEC | Respiratory and mediastinal neoplasms malignant and unspecified | Neoplasms benign, malignant and unspecified (incl cysts and polyps) |
| Renal cancer metastatic               | Renal neoplasms malignant                                                   | Renal and urinary tract neoplasms malignant and unspecified     | Neoplasms benign, malignant and unspecified (incl cysts and polyps) |
| Carcinoid tumour of the duodenum      | Carcinoid tumours                                                           | Endocrine neoplasms malignant and unspecified                   | Neoplasms benign, malignant and unspecified (incl cysts and polyps) |
| Gastrointestinal dysplasia            | Gastrointestinal mucosal dystrophies and secretion disorders                | Gastrointestinal conditions NEC                                 | Gastrointestinal disorders                                          |
| Gastric dysplasia                     | Gastrointestinal mucosal dystrophies and secretion disorders                | Gastrointestinal conditions NEC                                 | Gastrointestinal disorders                                          |
| Mediastinal cyst                      | Mediastinal disorders                                                       | Thoracic disorders (excl lung and pleura)                       | Respiratory, thoracic and mediastinal disorders                     |
| Oesophageal dysplasia                 | Gastrointestinal mucosal dystrophies and secretion disorders                | Gastrointestinal conditions NEC                                 | Gastrointestinal disorders                                          |
| Renal oncocytoma                      | Renal neoplasms benign                                                      | Renal and urinary tract neoplasms benign                        | Neoplasms benign, malignant and unspecified (incl cysts and polyps) |
| Adnexa uteri cyst                     | Pelvis and broad ligament disorders NEC                                     | Uterine, pelvic and broad ligament disorders                    | Reproductive system and breast disorders                            |
| Hygroma colli                         | Soft tissue neoplasms benign NEC                                            | Soft tissue neoplasms benign                                    | Neoplasms benign, malignant and unspecified (incl cysts and polyps) |
| Castleman's disease                   | Lymphoproliferative disorders NEC (excl leukaemias and lymphomas)           | Haematopoietic neoplasms (excl leukaemias and lymphomas)        | Neoplasms benign, malignant and unspecified (incl cysts and polyps) |
| Blast crisis in myelogenous leukaemia | Leukaemias myeloid NEC                                                      | Leukaemias                                                      | Neoplasms benign, malignant and                                     |

|                                 |                                                       |                                                             |                                                                     |
|---------------------------------|-------------------------------------------------------|-------------------------------------------------------------|---------------------------------------------------------------------|
|                                 |                                                       |                                                             | unspecified (incl cysts and polyps)                                 |
| Tumour ulceration               | Oncologic complications and emergencies               | Neoplasm related morbidities                                | Neoplasms benign, malignant and unspecified (incl cysts and polyps) |
| Vulva cyst                      | Vulvovaginal cysts and neoplasms                      | Vulvovaginal disorders (excl infections and inflammations)  | Reproductive system and breast disorders                            |
| Pinealoblastoma                 | Pineal neoplasms                                      | Nervous system neoplasms malignant and unspecified NEC      | Neoplasms benign, malignant and unspecified (incl cysts and polyps) |
| Eyelid tumour                   | Ocular neoplasms malignancy unspecified               | Ocular neoplasms                                            | Neoplasms benign, malignant and unspecified (incl cysts and polyps) |
| Infected naevus                 | Skin neoplasms benign                                 | Cutaneous neoplasms benign                                  | Neoplasms benign, malignant and unspecified (incl cysts and polyps) |
| Metastatic renal cell carcinoma | Renal neoplasms malignant                             | Renal and urinary tract neoplasms malignant and unspecified | Neoplasms benign, malignant and unspecified (incl cysts and polyps) |
| Fallopian tube cyst             | Ovarian and fallopian tube cysts and neoplasms        | Ovarian and fallopian tube disorders                        | Reproductive system and breast disorders                            |
| Congenital acrochordon          | Skin and subcutaneous tissue disorders congenital NEC | Skin and subcutaneous tissue disorders congenital           | Congenital, familial and genetic disorders                          |
| Radical prostatectomy           | Prostatic therapeutic procedures                      | Male genital tract therapeutic procedures                   | Surgical and medical procedures                                     |
| Liver carcinoma ruptured        | Hepatic neoplasms malignant                           | Hepatobiliary neoplasms malignant and unspecified           | Neoplasms benign, malignant and unspecified (incl cysts and polyps) |
| Eye naevus                      | Ocular neoplasms benign                               | Ocular neoplasms                                            | Neoplasms benign, malignant and unspecified (incl cysts and polyps) |
| Congenital eye naevus           | Iris and choroid disorders congenital                 | Eye disorders congenital                                    | Congenital, familial and genetic disorders                          |
| Gastrointestinal stromal tumour | Gastrointestinal neoplasms malignancy unspecified NEC | Gastrointestinal neoplasms malignant and unspecified        | Neoplasms benign, malignant and unspecified (incl cysts and polyps) |
| Intraneural cyst                | Nervous system cysts and polyps                       | Nervous system neoplasms benign                             | Nervous system disorders                                            |
| Myeloblastoma                   | Myeloproliferative disorders (excl leukaemias)        | Haematopoietic neoplasms (excl leukaemias)                  | Neoplasms benign, malignant and                                     |

|                                              |                                                                   |                                                                        |                                                                     |
|----------------------------------------------|-------------------------------------------------------------------|------------------------------------------------------------------------|---------------------------------------------------------------------|
|                                              |                                                                   | and lymphomas)                                                         | unspecified (incl cysts and polyps)                                 |
| Splenic cyst                                 | Haematological cysts and polyps                                   | Haematopoietic neoplasms (excl leukaemias and lymphomas)               | Blood and lymphatic system disorders                                |
| Chemodectoma                                 | Neoplasms benign site unspecified NEC                             | Miscellaneous and site unspecified neoplasms benign                    | Neoplasms benign, malignant and unspecified (incl cysts and polyps) |
| Xanthogranuloma                              | Soft tissue neoplasms benign NEC                                  | Soft tissue neoplasms benign                                           | Neoplasms benign, malignant and unspecified (incl cysts and polyps) |
| Bladder leukoplakia                          | Bladder disorders NEC                                             | Bladder and bladder neck disorders (excl calculi)                      | Renal and urinary disorders                                         |
| Thyroglossal cyst                            | Thyroid disorders congenital                                      | Endocrine disorders congenital                                         | Congenital, familial and genetic disorders                          |
| Post transplant lymphoproliferative disorder | Lymphoproliferative disorders NEC (excl leukaemias and lymphomas) | Haematopoietic neoplasms (excl leukaemias and lymphomas)               | Neoplasms benign, malignant and unspecified (incl cysts and polyps) |
| Malignant neoplasm progression               | Neoplasms malignant site unspecified NEC                          | Miscellaneous and site unspecified neoplasms malignant and unspecified | Neoplasms benign, malignant and unspecified (incl cysts and polyps) |
| Buccal polyp                                 | Benign oral cavity neoplasms                                      | Benign neoplasms gastrointestinal                                      | Gastrointestinal disorders                                          |
| Carbohydrate antigen 125 increased           | Cell marker analyses                                              | Cytogenetic investigations                                             | Investigations                                                      |
| Carbohydrate antigen 15-3 increased          | Cell marker analyses                                              | Cytogenetic investigations                                             | Investigations                                                      |
| Carbohydrate antigen 549 increased           | Cell marker analyses                                              | Cytogenetic investigations                                             | Investigations                                                      |
| Carbohydrate antigen 19-9 increased          | Cell marker analyses                                              | Cytogenetic investigations                                             | Investigations                                                      |
| Carbohydrate antigen 27.29 increased         | Cell marker analyses                                              | Cytogenetic investigations                                             | Investigations                                                      |
| Pharyngectomy                                | Pharyngeal therapeutic procedures                                 | Head and neck therapeutic procedures                                   | Surgical and medical procedures                                     |
| Pylorectomy                                  | Gastric therapeutic procedures                                    | Gastrointestinal therapeutic procedures                                | Surgical and medical procedures                                     |
| Chondromatosis                               | Cartilage neoplasms benign                                        | Skeletal neoplasms benign                                              | Neoplasms benign, malignant and unspecified (incl cysts and polyps) |

|                                |                                                                            |                                                                        |                                                                     |
|--------------------------------|----------------------------------------------------------------------------|------------------------------------------------------------------------|---------------------------------------------------------------------|
| Ureteral polyp                 | Ureteric disorders NEC                                                     | Ureteric disorders                                                     | Renal and urinary disorders                                         |
| Urethral polyp                 | Urethral neoplasms                                                         | Urethral disorders (excl calculi)                                      | Renal and urinary disorders                                         |
| Vocal cord cyst                | Laryngeal and adjacent sites disorders NEC (excl infections and neoplasms) | Upper respiratory tract disorders (excl infections)                    | Respiratory, thoracic and mediastinal disorders                     |
| Acquired bronchial cyst        | Bronchial conditions NEC                                                   | Bronchial disorders (excl neoplasms)                                   | Respiratory, thoracic and mediastinal disorders                     |
| Cardiac neoplasm unspecified   | Cardiovascular neoplasms malignant and unspecified                         | Miscellaneous and site unspecified neoplasms malignant and unspecified | Neoplasms benign, malignant and unspecified (incl cysts and polyps) |
| Large intestine polyp          | Benign neoplasms gastrointestinal (excl oral cavity)                       | Benign neoplasms gastrointestinal                                      | Gastrointestinal disorders                                          |
| Abdominal wall cyst            | Abdominal wall conditions NEC                                              | Abdominal hernias and other abdominal wall conditions                  | Gastrointestinal disorders                                          |
| Gastrointestinal tract adenoma | Gastrointestinal neoplasms benign NEC                                      | Gastrointestinal neoplasms benign                                      | Neoplasms benign, malignant and unspecified (incl cysts and polyps) |
| Salivary gland adenoma         | Lip and oral cavity neoplasms benign                                       | Gastrointestinal neoplasms benign                                      | Neoplasms benign, malignant and unspecified (incl cysts and polyps) |
| Testicle adenoma               | Reproductive neoplasms male benign NEC                                     | Reproductive neoplasms male benign                                     | Neoplasms benign, malignant and unspecified (incl cysts and polyps) |
| Urethral adenoma               | Urinary tract neoplasms benign                                             | Renal and urinary tract neoplasms benign                               | Neoplasms benign, malignant and unspecified (incl cysts and polyps) |
| Urinary bladder adenoma        | Urinary tract neoplasms benign                                             | Renal and urinary tract neoplasms benign                               | Neoplasms benign, malignant and unspecified (incl cysts and polyps) |
| Chest wall cyst                | Benign musculoskeletal and connective tissue neoplasms                     | Musculoskeletal and connective tissue neoplasms                        | Musculoskeletal and connective tissue disorders                     |
| Tongue dysplasia               | Tongue disorders                                                           | Tongue conditions                                                      | Gastrointestinal disorders                                          |
| Large intestine fibroma        | Lower gastrointestinal neoplasms benign                                    | Gastrointestinal neoplasms benign                                      | Neoplasms benign, malignant and unspecified (incl cysts and polyps) |

|                                         |                                      |                                   |                                                                     |
|-----------------------------------------|--------------------------------------|-----------------------------------|---------------------------------------------------------------------|
| Oral fibroma                            | Lip and oral cavity neoplasms benign | Gastrointestinal neoplasms benign | Neoplasms benign, malignant and unspecified (incl cysts and polyps) |
| Metastases to bone marrow               | Metastases to specified sites        | Metastases                        | Neoplasms benign, malignant and unspecified (incl cysts and polyps) |
| Metastases to chest wall                | Metastases to specified sites        | Metastases                        | Neoplasms benign, malignant and unspecified (incl cysts and polyps) |
| Metastases to abdominal wall            | Metastases to specified sites        | Metastases                        | Neoplasms benign, malignant and unspecified (incl cysts and polyps) |
| Metastases to diaphragm                 | Metastases to specified sites        | Metastases                        | Neoplasms benign, malignant and unspecified (incl cysts and polyps) |
| Metastases to Eustachian tube           | Metastases to specified sites        | Metastases                        | Neoplasms benign, malignant and unspecified (incl cysts and polyps) |
| Metastases to gallbladder               | Metastases to specified sites        | Metastases                        | Neoplasms benign, malignant and unspecified (incl cysts and polyps) |
| Metastases to larynx                    | Metastases to specified sites        | Metastases                        | Neoplasms benign, malignant and unspecified (incl cysts and polyps) |
| Metastases to mouth                     | Metastases to specified sites        | Metastases                        | Neoplasms benign, malignant and unspecified (incl cysts and polyps) |
| Metastases to nasal sinuses             | Metastases to specified sites        | Metastases                        | Neoplasms benign, malignant and unspecified (incl cysts and polyps) |
| Metastases to oesophagus                | Metastases to specified sites        | Metastases                        | Neoplasms benign, malignant and unspecified (incl cysts and polyps) |
| Metastases to penis                     | Metastases to specified sites        | Metastases                        | Neoplasms benign, malignant and unspecified (incl cysts and polyps) |
| Metastases to perineum                  | Metastases to specified sites        | Metastases                        | Neoplasms benign, malignant and unspecified (incl cysts and polyps) |
| Metastases to peripheral nervous system | Metastases to specified sites        | Metastases                        | Neoplasms benign, malignant and unspecified (incl cysts and polyps) |



|                               |                                                      |                                                     |                                                                     |
|-------------------------------|------------------------------------------------------|-----------------------------------------------------|---------------------------------------------------------------------|
| Metastases to peritoneum      | Metastases to specified sites                        | Metastases                                          | Neoplasms benign, malignant and unspecified (incl cysts and polyps) |
| Metastases to pharynx         | Metastases to specified sites                        | Metastases                                          | Neoplasms benign, malignant and unspecified (incl cysts and polyps) |
| Metastases to prostate        | Metastases to specified sites                        | Metastases                                          | Neoplasms benign, malignant and unspecified (incl cysts and polyps) |
| Metastases to rectum          | Metastases to specified sites                        | Metastases                                          | Neoplasms benign, malignant and unspecified (incl cysts and polyps) |
| Metastases to retroperitoneum | Metastases to specified sites                        | Metastases                                          | Neoplasms benign, malignant and unspecified (incl cysts and polyps) |
| Metastases to salivary gland  | Metastases to specified sites                        | Metastases                                          | Neoplasms benign, malignant and unspecified (incl cysts and polyps) |
| Metastases to spleen          | Metastases to specified sites                        | Metastases                                          | Neoplasms benign, malignant and unspecified (incl cysts and polyps) |
| Metastases to testicle        | Metastases to specified sites                        | Metastases                                          | Neoplasms benign, malignant and unspecified (incl cysts and polyps) |
| Metastases to thorax          | Metastases to specified sites                        | Metastases                                          | Neoplasms benign, malignant and unspecified (incl cysts and polyps) |
| Metastases to trachea         | Metastases to specified sites                        | Metastases                                          | Neoplasms benign, malignant and unspecified (incl cysts and polyps) |
| Pituitary cyst                | Pituitary neoplasms                                  | Hypothalamus and pituitary gland disorders          | Endocrine disorders                                                 |
| Retroperitoneum cyst          | Benign neoplasms gastrointestinal (excl oral cavity) | Benign neoplasms gastrointestinal                   | Gastrointestinal disorders                                          |
| Urinary bladder sarcoma       | Soft tissue sarcomas histology unspecified           | Soft tissue neoplasms malignant and unspecified     | Neoplasms benign, malignant and unspecified (incl cysts and polyps) |
| Vaginectomy                   | Vaginal therapeutic procedures                       | Obstetric and gynaecological therapeutic procedures | Surgical and medical procedures                                     |
| Metastases to meninges        | Metastases to specified sites                        | Metastases                                          | Neoplasms benign, malignant and                                     |

|                              |                                                                            |                                                                        |                                                                     |
|------------------------------|----------------------------------------------------------------------------|------------------------------------------------------------------------|---------------------------------------------------------------------|
|                              |                                                                            |                                                                        | unspecified (incl cysts and polyps)                                 |
| Hepatic cyst infection       | Hepatobiliary and spleen infections                                        | Infections - pathogen unspecified                                      | Infections and infestations                                         |
| Lymphoma cutis               | B-cell lymphomas NEC                                                       | Lymphomas non-Hodgkin's B-cell                                         | Neoplasms benign, malignant and unspecified (incl cysts and polyps) |
| Gastrinoma malignant         | Islet cell neoplasms and APUDoma NEC                                       | Endocrine neoplasms malignant and unspecified                          | Neoplasms benign, malignant and unspecified (incl cysts and polyps) |
| Phaeochromocytoma malignant  | Islet cell neoplasms and APUDoma NEC                                       | Endocrine neoplasms malignant and unspecified                          | Neoplasms benign, malignant and unspecified (incl cysts and polyps) |
| Nasal neoplasm benign        | Nasal and paranasal sinus neoplasms benign                                 | Respiratory and mediastinal neoplasms benign (excl mesotheliomas)      | Neoplasms benign, malignant and unspecified (incl cysts and polyps) |
| Nasal cyst                   | Nasal disorders NEC                                                        | Upper respiratory tract disorders (excl infections)                    | Respiratory, thoracic and mediastinal disorders                     |
| Ota's naevus                 | Skin and subcutaneous tissue disorders congenital NEC                      | Skin and subcutaneous tissue disorders congenital                      | Congenital, familial and genetic disorders                          |
| Pericardial cyst             | Cardiac neoplasms NEC                                                      | Cardiac neoplasms                                                      | Cardiac disorders                                                   |
| Pharyngeal leukoplakia       | Pharyngeal disorders (excl infections and neoplasms)                       | Upper respiratory tract disorders (excl infections)                    | Respiratory, thoracic and mediastinal disorders                     |
| Multiple endocrine neoplasia | Endocrine disorders congenital NEC                                         | Endocrine disorders congenital                                         | Congenital, familial and genetic disorders                          |
| Perineurial cyst             | Nervous system cysts and polyps                                            | Nervous system neoplasms benign                                        | Nervous system disorders                                            |
| Pseudosarcoma                | Neoplasms unspecified malignancy and site unspecified NEC                  | Miscellaneous and site unspecified neoplasms malignant and unspecified | Neoplasms benign, malignant and unspecified (incl cysts and polyps) |
| Angiomyolipoma               | Soft tissue neoplasms benign NEC                                           | Soft tissue neoplasms benign                                           | Neoplasms benign, malignant and unspecified (incl cysts and polyps) |
| Laryngeal cyst               | Laryngeal and adjacent sites disorders NEC (excl infections and neoplasms) | Upper respiratory tract disorders (excl infections)                    | Respiratory, thoracic and mediastinal disorders                     |
| Tongue cyst                  | Benign oral cavity neoplasms                                               | Benign neoplasms gastrointestinal                                      | Gastrointestinal disorders                                          |

|                                                     |                                                                             |                                                                 |                                                                     |
|-----------------------------------------------------|-----------------------------------------------------------------------------|-----------------------------------------------------------------|---------------------------------------------------------------------|
| Cowden's disease                                    | Autosomal chromosomal abnormalities                                         | Chromosomal abnormalities and abnormal gene carriers            | Congenital, familial and genetic disorders                          |
| Hereditary non-polyposis colorectal cancer syndrome | Intestinal disorders congenital                                             | Gastrointestinal tract disorders congenital                     | Congenital, familial and genetic disorders                          |
| Intestinal adenocarcinoma                           | Gastrointestinal neoplasms malignant NEC                                    | Gastrointestinal neoplasms malignant and unspecified            | Neoplasms benign, malignant and unspecified (incl cysts and polyps) |
| Diaphragm neoplasm                                  | Respiratory tract and pleural neoplasms malignancy unspecified NEC          | Respiratory and mediastinal neoplasms malignant and unspecified | Neoplasms benign, malignant and unspecified (incl cysts and polyps) |
| Oesophageal polyp                                   | Benign neoplasms gastrointestinal (excl oral cavity)                        | Benign neoplasms gastrointestinal                               | Gastrointestinal disorders                                          |
| Peritoneal cyst                                     | Peritoneal and retroperitoneal disorders                                    | Peritoneal and retroperitoneal conditions                       | Gastrointestinal disorders                                          |
| Pharyngeal polyp                                    | Pharyngeal disorders (excl infections and neoplasms)                        | Upper respiratory tract disorders (excl infections)             | Respiratory, thoracic and mediastinal disorders                     |
| Renal adenoma                                       | Renal neoplasms benign                                                      | Renal and urinary tract neoplasms benign                        | Neoplasms benign, malignant and unspecified (incl cysts and polyps) |
| Peritoneal sarcoma                                  | Gastrointestinal neoplasms malignant NEC                                    | Gastrointestinal neoplasms malignant and unspecified            | Neoplasms benign, malignant and unspecified (incl cysts and polyps) |
| Pleural sarcoma                                     | Respiratory tract and pleural neoplasms malignant cell type unspecified NEC | Respiratory and mediastinal neoplasms malignant and unspecified | Neoplasms benign, malignant and unspecified (incl cysts and polyps) |
| Uvulectomy                                          | Palatal therapeutic procedures                                              | Head and neck therapeutic procedures                            | Surgical and medical procedures                                     |
| Anogenital dysplasia                                | Anal and rectal disorders NEC                                               | Anal and rectal conditions NEC                                  | Gastrointestinal disorders                                          |
| Foetal cystic hygroma                               | Congenital disorders NEC                                                    | Congenital and hereditary disorders NEC                         | Congenital, familial and genetic disorders                          |
| Congenital teratoma                                 | Congenital disorders NEC                                                    | Congenital and hereditary disorders NEC                         | Congenital, familial and genetic disorders                          |
| Lymphocytic lymphoma                                | Lymphomas unspecified NEC                                                   | Lymphomas NEC                                                   | Neoplasms benign, malignant and unspecified (incl cysts and polyps) |
| Aural cystadenoma                                   | Aural neoplasms benign                                                      | Miscellaneous and site unspecified neoplasms benign             | Neoplasms benign, malignant and unspecified (incl cysts and polyps) |

|                                  |                                                                    |                                                                   |                                                                     |
|----------------------------------|--------------------------------------------------------------------|-------------------------------------------------------------------|---------------------------------------------------------------------|
| Tumour associated fever          | Oncologic complications and emergencies                            | Neoplasm related morbidities                                      | Neoplasms benign, malignant and unspecified (incl cysts and polyps) |
| Bronchial neoplasm               | Respiratory tract and pleural neoplasms malignancy unspecified NEC | Respiratory and mediastinal neoplasms malignant and unspecified   | Neoplasms benign, malignant and unspecified (incl cysts and polyps) |
| Bronchial neoplasm benign        | Respiratory tract and pleural neoplasms benign NEC                 | Respiratory and mediastinal neoplasms benign (excl mesotheliomas) | Neoplasms benign, malignant and unspecified (incl cysts and polyps) |
| Salivary gland cyst              | Salivary gland disorders NEC                                       | Salivary gland conditions                                         | Gastrointestinal disorders                                          |
| Focal nodular hyperplasia        | Hepatobiliary neoplasms benign                                     | Hepatic and biliary neoplasms benign                              | Neoplasms benign, malignant and unspecified (incl cysts and polyps) |
| Epidermodysplasia verruciformis  | Papilloma viral infections                                         | Viral infectious disorders                                        | Infections and infestations                                         |
| Colorectal cancer metastatic     | Colorectal neoplasms malignant                                     | Gastrointestinal neoplasms malignant and unspecified              | Neoplasms benign, malignant and unspecified (incl cysts and polyps) |
| Colorectal adenocarcinoma        | Colorectal neoplasms malignant                                     | Gastrointestinal neoplasms malignant and unspecified              | Neoplasms benign, malignant and unspecified (incl cysts and polyps) |
| Leukaemic infiltration pulmonary | Leukaemias NEC                                                     | Leukaemias                                                        | Neoplasms benign, malignant and unspecified (incl cysts and polyps) |
| Cerebral hygroma                 | Nervous system neoplasms benign NEC                                | Nervous system neoplasms benign                                   | Neoplasms benign, malignant and unspecified (incl cysts and polyps) |
| Biliary cyst                     | Structural and other bile duct disorders                           | Bile duct disorders                                               | Hepatobiliary disorders                                             |
| Neuroendocrine tumour            | Endocrine neoplasms malignant and unspecified NEC                  | Endocrine neoplasms malignant and unspecified                     | Neoplasms benign, malignant and unspecified (incl cysts and polyps) |
| Ocular neoplasm                  | Ocular neoplasms malignancy unspecified                            | Ocular neoplasms                                                  | Neoplasms benign, malignant and unspecified (incl cysts and polyps) |
| Parovarian cyst                  | Ovarian and fallopian tube cysts and neoplasms                     | Ovarian and fallopian tube disorders                              | Reproductive system and breast disorders                            |
| Seminal vesicular cyst           | Reproductive tract disorders NEC (excl neoplasms)                  | Reproductive tract disorders NEC                                  | Reproductive system and breast disorders                            |
| Epiglottidectomy                 | Laryngeal therapeutic procedures                                   | Head and neck therapeutic procedures                              | Surgical and medical procedures                                     |

|                                        |                                                                |                                                           |                                                                     |
|----------------------------------------|----------------------------------------------------------------|-----------------------------------------------------------|---------------------------------------------------------------------|
| Hemilaryngectomy                       | Laryngeal therapeutic procedures                               | Head and neck therapeutic procedures                      | Surgical and medical procedures                                     |
| Vocal cordectomy                       | Laryngeal therapeutic procedures                               | Head and neck therapeutic procedures                      | Surgical and medical procedures                                     |
| Laryngopharyngectomy                   | Laryngeal therapeutic procedures                               | Head and neck therapeutic procedures                      | Surgical and medical procedures                                     |
| Uterine tumour excision                | Uterine therapeutic procedures                                 | Obstetric and gynaecological therapeutic procedures       | Surgical and medical procedures                                     |
| Transurethral bladder resection        | Bladder therapeutic procedures                                 | Renal and urinary tract therapeutic procedures            | Surgical and medical procedures                                     |
| Adenocarcinoma pancreas                | Pancreatic neoplasms malignant (excl islet cell and carcinoid) | Gastrointestinal neoplasms malignant and unspecified      | Neoplasms benign, malignant and unspecified (incl cysts and polyps) |
| Fibrous cortical defect                | Bone neoplasms benign (excl cysts)                             | Skeletal neoplasms benign                                 | Neoplasms benign, malignant and unspecified (incl cysts and polyps) |
| Intestinal polypectomy                 | Gastrointestinal therapeutic procedures NEC                    | Gastrointestinal therapeutic procedures                   | Surgical and medical procedures                                     |
| Ovarian dysgerminoma stage unspecified | Ovarian germ cell neoplasms malignant                          | Reproductive neoplasms female malignant and unspecified   | Neoplasms benign, malignant and unspecified (incl cysts and polyps) |
| Oral polypectomy                       | Head, neck and oral cavity therapeutic procedures NEC          | Head and neck therapeutic procedures                      | Surgical and medical procedures                                     |
| Carcinoid tumour of the small bowel    | Carcinoid tumours                                              | Endocrine neoplasms malignant and unspecified             | Neoplasms benign, malignant and unspecified (incl cysts and polyps) |
| Erythroplasia of penis                 | Reproductive neoplasms male unspecified malignancy             | Reproductive neoplasms male malignant and unspecified     | Neoplasms benign, malignant and unspecified (incl cysts and polyps) |
| Erythroplasia of vulva                 | Female reproductive neoplasms unspecified malignancy           | Reproductive neoplasms female malignant and unspecified   | Neoplasms benign, malignant and unspecified (incl cysts and polyps) |
| Erythroplasia of lip                   | Lip and oral cavity neoplasms malignancy unspecified           | Gastrointestinal neoplasms malignant and unspecified      | Neoplasms benign, malignant and unspecified (incl cysts and polyps) |
| Electron radiation therapy to blood    | Haematological radiotherapies                                  | Haematological and lymphoid tissue therapeutic procedures | Surgical and medical procedures                                     |
| Gamma radiation therapy to blood       | Haematological radiotherapies                                  | Haematological and lymphoid tissue                        | Surgical and medical procedures                                     |

|                                           |                                         |                                                           |                                                                     |
|-------------------------------------------|-----------------------------------------|-----------------------------------------------------------|---------------------------------------------------------------------|
|                                           |                                         | therapeutic procedures                                    |                                                                     |
| Photon radiation therapy to blood         | Haematological radiotherapies           | Haematological and lymphoid tissue therapeutic procedures | Surgical and medical procedures                                     |
| X-ray therapy to blood                    | Haematological radiotherapies           | Haematological and lymphoid tissue therapeutic procedures | Surgical and medical procedures                                     |
| Electron radiation therapy to liver       | Hepatobiliary radiotherapies            | Hepatobiliary therapeutic procedures                      | Surgical and medical procedures                                     |
| Gamma radiation therapy to liver          | Hepatobiliary radiotherapies            | Hepatobiliary therapeutic procedures                      | Surgical and medical procedures                                     |
| Photon radiation therapy to liver         | Hepatobiliary radiotherapies            | Hepatobiliary therapeutic procedures                      | Surgical and medical procedures                                     |
| X-ray therapy to liver                    | Hepatobiliary radiotherapies            | Hepatobiliary therapeutic procedures                      | Surgical and medical procedures                                     |
| Electron radiation therapy to soft tissue | Soft tissue radiotherapies              | Soft tissue therapeutic procedures                        | Surgical and medical procedures                                     |
| Gamma radiation therapy to soft tissue    | Soft tissue radiotherapies              | Soft tissue therapeutic procedures                        | Surgical and medical procedures                                     |
| Photon radiation therapy to soft tissue   | Soft tissue radiotherapies              | Soft tissue therapeutic procedures                        | Surgical and medical procedures                                     |
| X-ray therapy to soft tissue              | Soft tissue radiotherapies              | Soft tissue therapeutic procedures                        | Surgical and medical procedures                                     |
| Neoplasm of cornea unspecified malignancy | Ocular neoplasms malignancy unspecified | Ocular neoplasms                                          | Neoplasms benign, malignant and unspecified (incl cysts and polyps) |
| Lymphoma operation                        | Lymphoid tissue therapeutic procedures  | Haematological and lymphoid tissue therapeutic procedures | Surgical and medical procedures                                     |
| Lymphoid tissue operation                 | Lymphoid tissue therapeutic procedures  | Haematological and lymphoid tissue therapeutic procedures | Surgical and medical procedures                                     |
| Hysterosalpingectomy                      | Uterine therapeutic procedures          | Obstetric and gynaecological therapeutic procedures       | Surgical and medical procedures                                     |
| Malignant nipple neoplasm male            | Breast and nipple neoplasms malignant   | Breast neoplasms malignant and unspecified (incl nipple)  | Neoplasms benign, malignant and unspecified (incl cysts and polyps) |
| Malignant nipple neoplasm female          | Breast and nipple neoplasms malignant   | Breast neoplasms malignant and unspecified (incl nipple)  | Neoplasms benign, malignant and unspecified (incl cysts and polyps) |

|                                         |                                                       |                                                                        |                                                                     |
|-----------------------------------------|-------------------------------------------------------|------------------------------------------------------------------------|---------------------------------------------------------------------|
| Lymphangiosis carcinomatosa             | Metastases to specified sites                         | Metastases                                                             | Neoplasms benign, malignant and unspecified (incl cysts and polyps) |
| Genital cyst                            | Reproductive tract neoplasms NEC                      | Reproductive tract disorders NEC                                       | Reproductive system and breast disorders                            |
| Leukaemia cutis                         | Leukaemias NEC                                        | Leukaemias                                                             | Neoplasms benign, malignant and unspecified (incl cysts and polyps) |
| Splenic neoplasm malignancy unspecified | Haematologic neoplasms NEC                            | Haematopoietic neoplasms (excl leukaemias and lymphomas)               | Neoplasms benign, malignant and unspecified (incl cysts and polyps) |
| Adenoid cystic carcinoma                | Neoplasms malignant site unspecified NEC              | Miscellaneous and site unspecified neoplasms malignant and unspecified | Neoplasms benign, malignant and unspecified (incl cysts and polyps) |
| Ostectomy                               | Bone therapeutic procedures NEC                       | Bone and joint therapeutic procedures                                  | Surgical and medical procedures                                     |
| Biopsy ear abnormal                     | Ear and labyrinth histopathology procedures           | Neurological, special senses and psychiatric investigations            | Investigations                                                      |
| Biopsy small intestine abnormal         | Gastrointestinal histopathology procedures            | Gastrointestinal investigations                                        | Investigations                                                      |
| Nephroureterectomy                      | Renal therapeutic procedures                          | Renal and urinary tract therapeutic procedures                         | Surgical and medical procedures                                     |
| Pancreaticosplenectomy                  | Abdominal therapeutic procedures NEC                  | Gastrointestinal therapeutic procedures                                | Surgical and medical procedures                                     |
| Nervous system neoplasm surgery         | Nervous system therapeutic procedures NEC             | Nervous system, skull and spine therapeutic procedures                 | Surgical and medical procedures                                     |
| Oral cavity neoplasm surgery            | Head, neck and oral cavity therapeutic procedures NEC | Head and neck therapeutic procedures                                   | Surgical and medical procedures                                     |
| Venous angioma of brain                 | Venous disorders congenital                           | Cardiac and vascular disorders congenital                              | Congenital, familial and genetic disorders                          |
| Hemipelvectomy                          | Therapeutic procedures NEC                            | Therapeutic procedures and supportive care NEC                         | Surgical and medical procedures                                     |
| Scan bone marrow abnormal               | Bone marrow and immune tissue imaging procedures      | Haematology investigations (incl blood groups)                         | Investigations                                                      |
| Gastrointestinal cancer metastatic      | Gastrointestinal neoplasms malignant NEC              | Gastrointestinal neoplasms malignant and unspecified                   | Neoplasms benign, malignant and unspecified (incl cysts and polyps) |

|                                          |                                                          |                                                        |                                                                     |
|------------------------------------------|----------------------------------------------------------|--------------------------------------------------------|---------------------------------------------------------------------|
| Immunoblastic lymphoma                   | Non-Hodgkin's lymphomas unspecified histology aggressive | Lymphomas non-Hodgkin's unspecified histology          | Neoplasms benign, malignant and unspecified (incl cysts and polyps) |
| Optic nerve neoplasm                     | Ocular neoplasms malignancy unspecified                  | Ocular neoplasms                                       | Neoplasms benign, malignant and unspecified (incl cysts and polyps) |
| Fibrous histiocytoma                     | Skin neoplasms benign                                    | Cutaneous neoplasms benign                             | Neoplasms benign, malignant and unspecified (incl cysts and polyps) |
| Blast cell crisis                        | Leukaemias acute NEC                                     | Leukaemias                                             | Neoplasms benign, malignant and unspecified (incl cysts and polyps) |
| Brain tumour operation                   | Skull and brain therapeutic procedures                   | Nervous system, skull and spine therapeutic procedures | Surgical and medical procedures                                     |
| Sigmoidectomy                            | Large intestine therapeutic procedures                   | Gastrointestinal therapeutic procedures                | Surgical and medical procedures                                     |
| Free prostate-specific antigen positive  | Cell marker analyses                                     | Cytogenetic investigations                             | Investigations                                                      |
| Free prostate-specific antigen increased | Cell marker analyses                                     | Cytogenetic investigations                             | Investigations                                                      |
| Benign fallopian tube neoplasm           | Reproductive neoplasms female benign NEC                 | Reproductive neoplasms female benign                   | Neoplasms benign, malignant and unspecified (incl cysts and polyps) |
| POEMS syndrome                           | Plasma cell myelomas                                     | Plasma cell neoplasms                                  | Neoplasms benign, malignant and unspecified (incl cysts and polyps) |
| Hepatic cyst ruptured                    | Hepatic and hepatobiliary disorders NEC                  | Hepatic and hepatobiliary disorders                    | Hepatobiliary disorders                                             |
| Hemicorporectomy                         | Therapeutic procedures NEC                               | Therapeutic procedures and supportive care NEC         | Surgical and medical procedures                                     |
| Oestrogen receptor assay positive        | Cell marker analyses                                     | Cytogenetic investigations                             | Investigations                                                      |
| Progesterone receptor assay positive     | Cell marker analyses                                     | Cytogenetic investigations                             | Investigations                                                      |
| Tumour necrosis                          | Oncologic complications and emergencies                  | Neoplasm related morbidities                           | Neoplasms benign, malignant and unspecified (incl cysts and polyps) |
| Haemorrhagic tumour necrosis             | Oncologic complications and emergencies                  | Neoplasm related morbidities                           | Neoplasms benign, malignant and unspecified (incl cysts and polyps) |



|                                   |                                                    |                                                                        |                                                                     |
|-----------------------------------|----------------------------------------------------|------------------------------------------------------------------------|---------------------------------------------------------------------|
| Small intestine carcinoma         | Small intestinal neoplasms malignant               | Gastrointestinal neoplasms malignant and unspecified                   | Neoplasms benign, malignant and unspecified (incl cysts and polyps) |
| Total adrenalectomy               | Adrenal gland therapeutic procedures               | Endocrine gland therapeutic procedures                                 | Surgical and medical procedures                                     |
| Intestinal resection              | Gastrointestinal therapeutic procedures NEC        | Gastrointestinal therapeutic procedures                                | Surgical and medical procedures                                     |
| Contralateral breast cancer       | Breast and nipple neoplasms malignant              | Breast neoplasms malignant and unspecified (incl nipple)               | Neoplasms benign, malignant and unspecified (incl cysts and polyps) |
| Myolipoma                         | Soft tissue neoplasms benign NEC                   | Soft tissue neoplasms benign                                           | Neoplasms benign, malignant and unspecified (incl cysts and polyps) |
| Hepatic haemangioma rupture       | Hepatobiliary neoplasms benign                     | Hepatic and biliary neoplasms benign                                   | Neoplasms benign, malignant and unspecified (incl cysts and polyps) |
| Cystadenocarcinoma ovary          | Ovarian neoplasms malignant (excl germ cell)       | Reproductive neoplasms female malignant and unspecified                | Neoplasms benign, malignant and unspecified (incl cysts and polyps) |
| Serous cystadenocarcinoma ovary   | Ovarian neoplasms malignant (excl germ cell)       | Reproductive neoplasms female malignant and unspecified                | Neoplasms benign, malignant and unspecified (incl cysts and polyps) |
| Mucinous cystadenocarcinoma ovary | Ovarian neoplasms malignant (excl germ cell)       | Reproductive neoplasms female malignant and unspecified                | Neoplasms benign, malignant and unspecified (incl cysts and polyps) |
| Vulvar dysplasia                  | Vulvovaginal disorders NEC                         | Vulvovaginal disorders (excl infections and inflammations)             | Reproductive system and breast disorders                            |
| Pericardial neoplasm              | Cardiovascular neoplasms malignant and unspecified | Miscellaneous and site unspecified neoplasms malignant and unspecified | Neoplasms benign, malignant and unspecified (incl cysts and polyps) |
| Malignant pericardial neoplasm    | Cardiovascular neoplasms malignant and unspecified | Miscellaneous and site unspecified neoplasms malignant and unspecified | Neoplasms benign, malignant and unspecified (incl cysts and polyps) |
| Benign pericardium neoplasm       | Cardiovascular neoplasms benign                    | Miscellaneous and site unspecified neoplasms benign                    | Neoplasms benign, malignant and unspecified (incl cysts and polyps) |
| Disseminated large cell lymphoma  | Lymphomas unspecified NEC                          | Lymphomas NEC                                                          | Neoplasms benign, malignant and unspecified (incl cysts and polyps) |
| Congenital cerebral cyst          | Cerebral disorders congenital                      | Neurological disorders congenital                                      | Congenital, familial and genetic disorders                          |

|                                  |                                                                |                                                                        |                                                                     |
|----------------------------------|----------------------------------------------------------------|------------------------------------------------------------------------|---------------------------------------------------------------------|
| Pancreatic sarcoma               | Pancreatic neoplasms malignant (excl islet cell and carcinoid) | Gastrointestinal neoplasms malignant and unspecified                   | Neoplasms benign, malignant and unspecified (incl cysts and polyps) |
| Carcinoid tumour of the pancreas | Carcinoid tumours                                              | Endocrine neoplasms malignant and unspecified                          | Neoplasms benign, malignant and unspecified (incl cysts and polyps) |
| Gastric sarcoma                  | Gastric neoplasms malignant                                    | Gastrointestinal neoplasms malignant and unspecified                   | Neoplasms benign, malignant and unspecified (incl cysts and polyps) |
| Cardiac fibroma                  | Cardiovascular neoplasms benign                                | Miscellaneous and site unspecified neoplasms benign                    | Neoplasms benign, malignant and unspecified (incl cysts and polyps) |
| Cardiac lymphangioma             | Lymphatic system disorders congenital                          | Blood and lymphatic system disorders congenital                        | Congenital, familial and genetic disorders                          |
| Cardiac haemangioma benign       | Cardiovascular neoplasms benign                                | Miscellaneous and site unspecified neoplasms benign                    | Neoplasms benign, malignant and unspecified (incl cysts and polyps) |
| Cardiac neurofibroma             | Cardiovascular neoplasms benign                                | Miscellaneous and site unspecified neoplasms benign                    | Neoplasms benign, malignant and unspecified (incl cysts and polyps) |
| Ear neoplasm                     | Aural neoplasms malignant and unspecified                      | Miscellaneous and site unspecified neoplasms malignant and unspecified | Neoplasms benign, malignant and unspecified (incl cysts and polyps) |
| Ear neoplasm malignant           | Aural neoplasms malignant and unspecified                      | Miscellaneous and site unspecified neoplasms malignant and unspecified | Neoplasms benign, malignant and unspecified (incl cysts and polyps) |
| Gingival cyst                    | Gingival disorders NEC                                         | Dental and gingival conditions                                         | Gastrointestinal disorders                                          |
| Vascular neoplasm                | Cardiovascular neoplasms malignant and unspecified             | Miscellaneous and site unspecified neoplasms malignant and unspecified | Neoplasms benign, malignant and unspecified (incl cysts and polyps) |
| Testicular papilloma             | Reproductive neoplasms male benign NEC                         | Reproductive neoplasms male benign                                     | Neoplasms benign, malignant and unspecified (incl cysts and polyps) |
| Brain cancer metastatic          | Central nervous system neoplasms malignant NEC                 | Nervous system neoplasms malignant and unspecified NEC                 | Neoplasms benign, malignant and unspecified (incl cysts and polyps) |
| Cervix cancer metastatic         | Cervix neoplasms malignant                                     | Reproductive neoplasms female malignant and unspecified                | Neoplasms benign, malignant and unspecified (incl cysts and polyps) |

|                                 |                                                                      |                                                                        |                                                                     |
|---------------------------------|----------------------------------------------------------------------|------------------------------------------------------------------------|---------------------------------------------------------------------|
| Adrenal gland cancer metastatic | Adrenal neoplasms malignant                                          | Endocrine neoplasms malignant and unspecified                          | Neoplasms benign, malignant and unspecified (incl cysts and polyps) |
| Anal cancer metastatic          | Anal canal neoplasms malignant                                       | Gastrointestinal neoplasms malignant and unspecified                   | Neoplasms benign, malignant and unspecified (incl cysts and polyps) |
| Rectal cancer metastatic        | Colorectal neoplasms malignant                                       | Gastrointestinal neoplasms malignant and unspecified                   | Neoplasms benign, malignant and unspecified (incl cysts and polyps) |
| Oral cavity cancer metastatic   | Lip and oral cavity neoplasms malignant                              | Gastrointestinal neoplasms malignant and unspecified                   | Neoplasms benign, malignant and unspecified (incl cysts and polyps) |
| Ocular cancer metastatic        | Ocular neoplasms malignant (excl melanomas)                          | Ocular neoplasms                                                       | Neoplasms benign, malignant and unspecified (incl cysts and polyps) |
| Otic cancer metastatic          | Aural neoplasms malignant and unspecified                            | Miscellaneous and site unspecified neoplasms malignant and unspecified | Neoplasms benign, malignant and unspecified (incl cysts and polyps) |
| Bone cancer metastatic          | Bone neoplasms malignant (excl sarcomas)                             | Skeletal neoplasms malignant and unspecified                           | Neoplasms benign, malignant and unspecified (incl cysts and polyps) |
| Oesophageal cancer metastatic   | Oesophageal neoplasms malignant                                      | Gastrointestinal neoplasms malignant and unspecified                   | Neoplasms benign, malignant and unspecified (incl cysts and polyps) |
| Testicular cancer metastatic    | Testicular neoplasms malignant                                       | Reproductive neoplasms male malignant and unspecified                  | Neoplasms benign, malignant and unspecified (incl cysts and polyps) |
| Pharyngeal cancer metastatic    | Pharyngeal neoplasms malignant and unspecified                       | Respiratory and mediastinal neoplasms malignant and unspecified        | Neoplasms benign, malignant and unspecified (incl cysts and polyps) |
| Sinus cancer metastatic         | Paranasal sinus and nasal cavity neoplasms malignant and unspecified | Respiratory and mediastinal neoplasms malignant and unspecified        | Neoplasms benign, malignant and unspecified (incl cysts and polyps) |
| Pituitary cancer metastatic     | Endocrine neoplasms malignant and unspecified NEC                    | Endocrine neoplasms malignant and unspecified                          | Neoplasms benign, malignant and unspecified (incl cysts and polyps) |
| Thyroid cancer metastatic       | Thyroid neoplasms malignant                                          | Endocrine neoplasms malignant and unspecified                          | Neoplasms benign, malignant and unspecified (incl cysts and polyps) |
| Thymic cancer metastatic        | Mediastinal neoplasms malignant                                      | Respiratory and mediastinal neoplasms malignant and unspecified        | Neoplasms benign, malignant and unspecified (incl cysts and polyps) |

|                             |                                                          |                                                                 |                                                                     |
|-----------------------------|----------------------------------------------------------|-----------------------------------------------------------------|---------------------------------------------------------------------|
| Tongue cancer metastatic    | Lip and oral cavity neoplasms malignant                  | Gastrointestinal neoplasms malignant and unspecified            | Neoplasms benign, malignant and unspecified (incl cysts and polyps) |
| Hepatic cancer metastatic   | Hepatic neoplasms malignant                              | Hepatobiliary neoplasms malignant and unspecified               | Neoplasms benign, malignant and unspecified (incl cysts and polyps) |
| Biliary cancer metastatic   | Bile duct neoplasms malignant                            | Hepatobiliary neoplasms malignant and unspecified               | Neoplasms benign, malignant and unspecified (incl cysts and polyps) |
| Breast cancer metastatic    | Breast and nipple neoplasms malignant                    | Breast neoplasms malignant and unspecified (incl nipple)        | Neoplasms benign, malignant and unspecified (incl cysts and polyps) |
| Colon cancer metastatic     | Colorectal neoplasms malignant                           | Gastrointestinal neoplasms malignant and unspecified            | Neoplasms benign, malignant and unspecified (incl cysts and polyps) |
| Skin cancer metastatic      | Skin neoplasms malignant and unspecified (excl melanoma) | Skin neoplasms malignant and unspecified                        | Neoplasms benign, malignant and unspecified (incl cysts and polyps) |
| Metastases to urinary tract | Metastases to specified sites                            | Metastases                                                      | Neoplasms benign, malignant and unspecified (incl cysts and polyps) |
| Benign vascular neoplasm    | Cardiovascular neoplasms benign                          | Miscellaneous and site unspecified neoplasms benign             | Neoplasms benign, malignant and unspecified (incl cysts and polyps) |
| Ovarian embryonal carcinoma | Ovarian germ cell neoplasms malignant                    | Reproductive neoplasms female malignant and unspecified         | Neoplasms benign, malignant and unspecified (incl cysts and polyps) |
| Nipple neoplasm             | Breast neoplasms unspecified malignancy                  | Breast neoplasms malignant and unspecified (incl nipple)        | Neoplasms benign, malignant and unspecified (incl cysts and polyps) |
| Neoplasm of appendix        | Gastrointestinal neoplasms malignancy unspecified NEC    | Gastrointestinal neoplasms malignant and unspecified            | Neoplasms benign, malignant and unspecified (incl cysts and polyps) |
| Neoplasm of thymus          | Mediastinal neoplasms malignancy unspecified NEC         | Respiratory and mediastinal neoplasms malignant and unspecified | Neoplasms benign, malignant and unspecified (incl cysts and polyps) |
| Hypopharyngeal neoplasm     | Hypopharyngeal neoplasms malignant and unspecified       | Respiratory and mediastinal neoplasms malignant and unspecified | Neoplasms benign, malignant and unspecified (incl cysts and polyps) |
| Mastocytic leukaemia        | Leukaemias NEC                                           | Leukaemias                                                      | Neoplasms benign, malignant and unspecified (incl cysts and polyps) |

|                                   |                                                       |                                                                 |                                                                     |
|-----------------------------------|-------------------------------------------------------|-----------------------------------------------------------------|---------------------------------------------------------------------|
| Radiotherapy to thymus            | Lymphoid tissue therapeutic procedures                | Haematological and lymphoid tissue therapeutic procedures       | Surgical and medical procedures                                     |
| Benign biliary neoplasm           | Hepatobiliary neoplasms benign                        | Hepatic and biliary neoplasms benign                            | Neoplasms benign, malignant and unspecified (incl cysts and polyps) |
| Peritoneal mesothelioma malignant | Mesotheliomas malignant and unspecified               | Mesotheliomas                                                   | Neoplasms benign, malignant and unspecified (incl cysts and polyps) |
| Glomus jugulare tumour            | Nervous system neoplasms benign NEC                   | Nervous system neoplasms benign                                 | Neoplasms benign, malignant and unspecified (incl cysts and polyps) |
| Exploratory operation             | Therapeutic procedures NEC                            | Therapeutic procedures and supportive care NEC                  | Surgical and medical procedures                                     |
| Retroperitoneal neoplasm          | Gastrointestinal neoplasms malignancy unspecified NEC | Gastrointestinal neoplasms malignant and unspecified            | Neoplasms benign, malignant and unspecified (incl cysts and polyps) |
| Neuroectodermal neoplasm          | Nervous system neoplasms unspecified malignancy NEC   | Nervous system neoplasms malignant and unspecified NEC          | Neoplasms benign, malignant and unspecified (incl cysts and polyps) |
| Placental chorioangioma           | Reproductive neoplasms female benign NEC              | Reproductive neoplasms female benign                            | Neoplasms benign, malignant and unspecified (incl cysts and polyps) |
| Melanomatous meningitis           | Meningiomas malignant                                 | Nervous system neoplasms malignant and unspecified NEC          | Neoplasms benign, malignant and unspecified (incl cysts and polyps) |
| Gastric cyst                      | Benign neoplasms gastrointestinal (excl oral cavity)  | Benign neoplasms gastrointestinal                               | Gastrointestinal disorders                                          |
| Adenomatous polyposis coli        | Intestinal disorders congenital                       | Gastrointestinal tract disorders congenital                     | Congenital, familial and genetic disorders                          |
| Ileectomy                         | Small intestine therapeutic procedures                | Gastrointestinal therapeutic procedures                         | Surgical and medical procedures                                     |
| Jejunectomy                       | Small intestine therapeutic procedures                | Gastrointestinal therapeutic procedures                         | Surgical and medical procedures                                     |
| Cystoprostatectomy                | Bladder therapeutic procedures                        | Renal and urinary tract therapeutic procedures                  | Surgical and medical procedures                                     |
| Oesophagogastrectomy              | Gastrointestinal therapeutic procedures NEC           | Gastrointestinal therapeutic procedures                         | Surgical and medical procedures                                     |
| Vocal cord neoplasm               | Laryngeal neoplasms malignancy unspecified            | Respiratory and mediastinal neoplasms malignant and unspecified | Neoplasms benign, malignant and unspecified (incl cysts and polyps) |

|                                               |                                                                            |                                                                        |                                                                     |
|-----------------------------------------------|----------------------------------------------------------------------------|------------------------------------------------------------------------|---------------------------------------------------------------------|
| Paraneoplastic pemphigus                      | Paraneoplastic syndromes NEC                                               | Neoplasm related morbidities                                           | Neoplasms benign, malignant and unspecified (incl cysts and polyps) |
| Dermatofibrosarcoma protuberans               | Fibrosarcomas malignant                                                    | Soft tissue neoplasms malignant and unspecified                        | Neoplasms benign, malignant and unspecified (incl cysts and polyps) |
| Blast cells present                           | Haematological analyses NEC                                                | Haematology investigations (incl blood groups)                         | Investigations                                                      |
| Hypophysectomy                                | Pituitary and hypothalamic therapeutic procedures                          | Endocrine gland therapeutic procedures                                 | Surgical and medical procedures                                     |
| Acute megakaryocytic leukaemia (in remission) | Leukaemias acute myeloid                                                   | Leukaemias                                                             | Neoplasms benign, malignant and unspecified (incl cysts and polyps) |
| Laryngeal dysplasia                           | Laryngeal and adjacent sites disorders NEC (excl infections and neoplasms) | Upper respiratory tract disorders (excl infections)                    | Respiratory, thoracic and mediastinal disorders                     |
| Signet-ring cell carcinoma                    | Neoplasms malignant site unspecified NEC                                   | Miscellaneous and site unspecified neoplasms malignant and unspecified | Neoplasms benign, malignant and unspecified (incl cysts and polyps) |
| Mucoepidermoid carcinoma                      | Neoplasms malignant site unspecified NEC                                   | Miscellaneous and site unspecified neoplasms malignant and unspecified | Neoplasms benign, malignant and unspecified (incl cysts and polyps) |
| Neuroendocrine carcinoma                      | Endocrine neoplasms malignant and unspecified NEC                          | Endocrine neoplasms malignant and unspecified                          | Neoplasms benign, malignant and unspecified (incl cysts and polyps) |
| Malignant neoplasm of auricular cartilage     | Aural neoplasms malignant and unspecified                                  | Miscellaneous and site unspecified neoplasms malignant and unspecified | Neoplasms benign, malignant and unspecified (incl cysts and polyps) |
| Pituitary tumour recurrent                    | Endocrine neoplasms malignant and unspecified NEC                          | Endocrine neoplasms malignant and unspecified                          | Neoplasms benign, malignant and unspecified (incl cysts and polyps) |
| Testicular leiomyosarcoma                     | Leiomyosarcomas                                                            | Soft tissue neoplasms malignant and unspecified                        | Neoplasms benign, malignant and unspecified (incl cysts and polyps) |
| Adenolipoma                                   | Soft tissue neoplasms benign NEC                                           | Soft tissue neoplasms benign                                           | Neoplasms benign, malignant and unspecified (incl cysts and polyps) |
| Bronchial polyp                               | Bronchial conditions NEC                                                   | Bronchial disorders (excl neoplasms)                                   | Respiratory, thoracic and mediastinal disorders                     |
| Metastatic carcinoma of the bladder           | Bladder neoplasms malignant                                                | Renal and urinary tract neoplasms malignant                            | Neoplasms benign, malignant and                                     |

|                                     |                                                                            |                                                                 |                                                                     |
|-------------------------------------|----------------------------------------------------------------------------|-----------------------------------------------------------------|---------------------------------------------------------------------|
|                                     |                                                                            | and unspecified                                                 | unspecified (incl cysts and polyps)                                 |
| Ovarian granulosa-theca cell tumour | Female reproductive neoplasms unspecified malignancy                       | Reproductive neoplasms female malignant and unspecified         | Neoplasms benign, malignant and unspecified (incl cysts and polyps) |
| Choroid neoplasm                    | Ocular neoplasms malignancy unspecified                                    | Ocular neoplasms                                                | Neoplasms benign, malignant and unspecified (incl cysts and polyps) |
| Conjunctival neoplasm               | Ocular neoplasms malignancy unspecified                                    | Ocular neoplasms                                                | Neoplasms benign, malignant and unspecified (incl cysts and polyps) |
| Retinal neoplasm                    | Ocular neoplasms malignancy unspecified                                    | Ocular neoplasms                                                | Neoplasms benign, malignant and unspecified (incl cysts and polyps) |
| Lacrimal duct neoplasm              | Ocular neoplasms malignancy unspecified                                    | Ocular neoplasms                                                | Neoplasms benign, malignant and unspecified (incl cysts and polyps) |
| Iris neoplasm                       | Ocular neoplasms malignancy unspecified                                    | Ocular neoplasms                                                | Neoplasms benign, malignant and unspecified (incl cysts and polyps) |
| Ocular haemangiopericytoma          | Ocular neoplasms malignancy unspecified                                    | Ocular neoplasms                                                | Neoplasms benign, malignant and unspecified (incl cysts and polyps) |
| Benign neoplasm of optic nerve      | Ocular neoplasms benign                                                    | Ocular neoplasms                                                | Neoplasms benign, malignant and unspecified (incl cysts and polyps) |
| Retinal melanocytoma                | Ocular neoplasms benign                                                    | Ocular neoplasms                                                | Neoplasms benign, malignant and unspecified (incl cysts and polyps) |
| Epiglottic cyst                     | Laryngeal and adjacent sites disorders NEC (excl infections and neoplasms) | Upper respiratory tract disorders (excl infections)             | Respiratory, thoracic and mediastinal disorders                     |
| Epiglottic carcinoma                | Laryngeal neoplasms malignant                                              | Respiratory and mediastinal neoplasms malignant and unspecified | Neoplasms benign, malignant and unspecified (incl cysts and polyps) |
| Epiglottic mass                     | Laryngeal and adjacent sites disorders NEC (excl infections and neoplasms) | Upper respiratory tract disorders (excl infections)             | Respiratory, thoracic and mediastinal disorders                     |
| Oropharyngeal neoplasm              | Lip and oral cavity neoplasms malignancy unspecified                       | Gastrointestinal neoplasms malignant and unspecified            | Neoplasms benign, malignant and unspecified (incl cysts and polyps) |

|                                            |                                                                     |                                                                        |                                                                     |
|--------------------------------------------|---------------------------------------------------------------------|------------------------------------------------------------------------|---------------------------------------------------------------------|
| Paranasal sinus benign neoplasm            | Nasal and paranasal sinus neoplasms benign                          | Respiratory and mediastinal neoplasms benign (excl mesotheliomas)      | Neoplasms benign, malignant and unspecified (incl cysts and polyps) |
| Paranasal sinus neoplasm                   | Respiratory tract and pleural neoplasms malignancy unspecified NEC  | Respiratory and mediastinal neoplasms malignant and unspecified        | Neoplasms benign, malignant and unspecified (incl cysts and polyps) |
| Tonsillar cyst                             | Upper respiratory tract neoplasms                                   | Respiratory tract neoplasms                                            | Respiratory, thoracic and mediastinal disorders                     |
| Cardiac teratoma                           | Cardiovascular neoplasms malignant and unspecified                  | Miscellaneous and site unspecified neoplasms malignant and unspecified | Neoplasms benign, malignant and unspecified (incl cysts and polyps) |
| Ovarian cancer metastatic                  | Ovarian neoplasms malignant (excl germ cell)                        | Reproductive neoplasms female malignant and unspecified                | Neoplasms benign, malignant and unspecified (incl cysts and polyps) |
| Pituitary gland radiotherapy               | Pituitary and hypothalamic therapeutic procedures                   | Endocrine gland therapeutic procedures                                 | Surgical and medical procedures                                     |
| Testis cancer                              | Testicular neoplasms malignant                                      | Reproductive neoplasms male malignant and unspecified                  | Neoplasms benign, malignant and unspecified (incl cysts and polyps) |
| Peripheral neuroepithelioma of soft tissue | Soft tissue neoplasms malignant and unspecified NEC (excl sarcomas) | Soft tissue neoplasms malignant and unspecified                        | Neoplasms benign, malignant and unspecified (incl cysts and polyps) |
| Endometrial sarcoma                        | Endometrial neoplasms malignant                                     | Reproductive neoplasms female malignant and unspecified                | Neoplasms benign, malignant and unspecified (incl cysts and polyps) |
| Breast cancer female                       | Breast and nipple neoplasms malignant                               | Breast neoplasms malignant and unspecified (incl nipple)               | Neoplasms benign, malignant and unspecified (incl cysts and polyps) |
| Biopsy chest wall abnormal                 | Musculoskeletal and soft tissue histopathology procedures           | Musculoskeletal and soft tissue investigations (excl enzyme tests)     | Investigations                                                      |
| Angiosarcoma non-metastatic                | Cardiovascular neoplasms malignant and unspecified                  | Miscellaneous and site unspecified neoplasms malignant and unspecified | Neoplasms benign, malignant and unspecified (incl cysts and polyps) |
| Pituitary neoplasm malignant recurrent     | Endocrine neoplasms malignant and unspecified NEC                   | Endocrine neoplasms malignant and unspecified                          | Neoplasms benign, malignant and unspecified (incl cysts and polyps) |
| Primitive neuroectodermal tumour           | Nervous system neoplasms malignant NEC                              | Nervous system neoplasms malignant and unspecified NEC                 | Neoplasms benign, malignant and unspecified (incl cysts and polyps) |



|                                          |                                                                             |                                                                 |                                                                     |
|------------------------------------------|-----------------------------------------------------------------------------|-----------------------------------------------------------------|---------------------------------------------------------------------|
| Blepharal papilloma                      | Ocular neoplasms benign                                                     | Ocular neoplasms                                                | Neoplasms benign, malignant and unspecified (incl cysts and polyps) |
| Epulis                                   | Gingival disorders NEC                                                      | Dental and gingival conditions                                  | Gastrointestinal disorders                                          |
| Prostatic specific antigen abnormal      | Cell marker analyses                                                        | Cytogenetic investigations                                      | Investigations                                                      |
| Infected neoplasm                        | Oncologic complications and emergencies                                     | Neoplasm related morbidities                                    | Neoplasms benign, malignant and unspecified (incl cysts and polyps) |
| Infected cyst                            | Infections NEC                                                              | Infections - pathogen unspecified                               | Infections and infestations                                         |
| Cancer pain                              | Oncologic complications and emergencies                                     | Neoplasm related morbidities                                    | Neoplasms benign, malignant and unspecified (incl cysts and polyps) |
| Radiotherapy to pleura                   | Pleural radiation therapies                                                 | Respiratory tract therapeutic procedures                        | Surgical and medical procedures                                     |
| Phaeochromocytoma excision               | Adrenal gland therapeutic procedures                                        | Endocrine gland therapeutic procedures                          | Surgical and medical procedures                                     |
| Gallbladder cancer stage II              | Gallbladder neoplasms malignant                                             | Hepatobiliary neoplasms malignant and unspecified               | Neoplasms benign, malignant and unspecified (incl cysts and polyps) |
| Gallbladder cancer stage III             | Gallbladder neoplasms malignant                                             | Hepatobiliary neoplasms malignant and unspecified               | Neoplasms benign, malignant and unspecified (incl cysts and polyps) |
| Gallbladder cancer stage IV              | Gallbladder neoplasms malignant                                             | Hepatobiliary neoplasms malignant and unspecified               | Neoplasms benign, malignant and unspecified (incl cysts and polyps) |
| Gallbladder adenocarcinoma               | Gallbladder neoplasms malignant                                             | Hepatobiliary neoplasms malignant and unspecified               | Neoplasms benign, malignant and unspecified (incl cysts and polyps) |
| Metastatic bronchial carcinoma           | Respiratory tract and pleural neoplasms malignant cell type unspecified NEC | Respiratory and mediastinal neoplasms malignant and unspecified | Neoplasms benign, malignant and unspecified (incl cysts and polyps) |
| Metastases to peripheral vascular system | Metastases to specified sites                                               | Metastases                                                      | Neoplasms benign, malignant and unspecified (incl cysts and polyps) |
| Dysplasia                                | Trophic disorders                                                           | Tissue disorders NEC                                            | General disorders and administration site conditions                |
| Bronchioloalveolar carcinoma             | Respiratory tract and pleural neoplasms malignant cell                      | Respiratory and mediastinal neoplasms                           | Neoplasms benign, malignant and unspecified (incl cysts and polyps) |

|                                 |                                                           |                                                                      |                                     |
|---------------------------------|-----------------------------------------------------------|----------------------------------------------------------------------|-------------------------------------|
|                                 | type unspecified NEC                                      | malignant and unspecified                                            | unspecified (incl cysts and polyps) |
| Biopsy artery abnormal          | Vascular and lymphatic histopathology procedures          | Cardiac and vascular investigations (excl enzyme tests)              | Investigations                      |
| Biopsy bile duct abnormal       | Hepatobiliary histopathology procedures                   | Hepatobiliary investigations                                         | Investigations                      |
| Biopsy diaphragm abnormal       | Respiratory tract and thoracic histopathology procedures  | Respiratory and pulmonary investigations (excl blood gases)          | Investigations                      |
| Biopsy eyelid abnormal          | Histopathology procedures NEC                             | Investigations, imaging and histopathology procedures NEC            | Investigations                      |
| Biopsy fallopian tube abnormal  | Reproductive organ and breast histopathology procedures   | Reproductive organ and breast investigations (excl hormone analyses) | Investigations                      |
| Biopsy foetal abnormal          | Foetal and neonatal histopathology procedures             | Foetal and neonatal investigations                                   | Investigations                      |
| Biopsy intestine abnormal       | Gastrointestinal histopathology procedures                | Gastrointestinal investigations                                      | Investigations                      |
| Biopsy ligament abnormal        | Musculoskeletal and soft tissue histopathology procedures | Musculoskeletal and soft tissue investigations (excl enzyme tests)   | Investigations                      |
| Biopsy tendon abnormal          | Musculoskeletal and soft tissue histopathology procedures | Musculoskeletal and soft tissue investigations (excl enzyme tests)   | Investigations                      |
| Biopsy pancreas abnormal        | Gastrointestinal histopathology procedures                | Gastrointestinal investigations                                      | Investigations                      |
| Biopsy seminal vesicle abnormal | Reproductive organ and breast histopathology procedures   | Reproductive organ and breast investigations (excl hormone analyses) | Investigations                      |
| Biopsy uterus abnormal          | Reproductive organ and breast histopathology procedures   | Reproductive organ and breast investigations (excl hormone analyses) | Investigations                      |
| Biopsy vocal cord abnormal      | Respiratory tract and thoracic histopathology procedures  | Respiratory and pulmonary investigations (excl blood gases)          | Investigations                      |
| Mediastinal biopsy abnormal     | Respiratory tract and thoracic histopathology procedures  | Respiratory and pulmonary investigations (excl blood gases)          | Investigations                      |
| Biopsy blood vessel abnormal    | Vascular and lymphatic histopathology procedures          | Cardiac and vascular investigations (excl                            | Investigations                      |

|                                                |                                                                             |                                                                 |                                                                     |
|------------------------------------------------|-----------------------------------------------------------------------------|-----------------------------------------------------------------|---------------------------------------------------------------------|
|                                                |                                                                             | enzyme tests)                                                   |                                                                     |
| Haemangioma-thrombocytopenia syndrome          | Skin vascular conditions NEC                                                | Skin vascular abnormalities                                     | Skin and subcutaneous tissue disorders                              |
| Tongue carcinoma stage 0                       | Lip and oral cavity neoplasms malignant                                     | Gastrointestinal neoplasms malignant and unspecified            | Neoplasms benign, malignant and unspecified (incl cysts and polyps) |
| Tongue carcinoma stage I                       | Lip and oral cavity neoplasms malignant                                     | Gastrointestinal neoplasms malignant and unspecified            | Neoplasms benign, malignant and unspecified (incl cysts and polyps) |
| Tongue carcinoma stage II                      | Lip and oral cavity neoplasms malignant                                     | Gastrointestinal neoplasms malignant and unspecified            | Neoplasms benign, malignant and unspecified (incl cysts and polyps) |
| Tongue carcinoma stage III                     | Lip and oral cavity neoplasms malignant                                     | Gastrointestinal neoplasms malignant and unspecified            | Neoplasms benign, malignant and unspecified (incl cysts and polyps) |
| Tongue carcinoma stage IV                      | Lip and oral cavity neoplasms malignant                                     | Gastrointestinal neoplasms malignant and unspecified            | Neoplasms benign, malignant and unspecified (incl cysts and polyps) |
| Lung neoplasm malignant                        | Respiratory tract and pleural neoplasms malignant cell type unspecified NEC | Respiratory and mediastinal neoplasms malignant and unspecified | Neoplasms benign, malignant and unspecified (incl cysts and polyps) |
| Bladder cyst                                   | Bladder neoplasms                                                           | Bladder and bladder neck disorders (excl calculi)               | Renal and urinary disorders                                         |
| Oesophageal adenocarcinoma metastatic          | Oesophageal neoplasms malignant                                             | Gastrointestinal neoplasms malignant and unspecified            | Neoplasms benign, malignant and unspecified (incl cysts and polyps) |
| Oesophageal squamous cell carcinoma metastatic | Oesophageal neoplasms malignant                                             | Gastrointestinal neoplasms malignant and unspecified            | Neoplasms benign, malignant and unspecified (incl cysts and polyps) |
| Renal cyst infection                           | Urinary tract infections                                                    | Infections - pathogen unspecified                               | Infections and infestations                                         |
| Leukaemic infiltration hepatic                 | Leukaemias NEC                                                              | Leukaemias                                                      | Neoplasms benign, malignant and unspecified (incl cysts and polyps) |
| Chronic lymphocytic leukaemia transformation   | Leukaemias chronic lymphocytic                                              | Leukaemias                                                      | Neoplasms benign, malignant and unspecified (incl cysts and polyps) |
| Richter's syndrome                             | Diffuse large B-cell lymphomas                                              | Lymphomas non-Hodgkin's B-cell                                  | Neoplasms benign, malignant and unspecified (incl cysts and polyps) |

|                                            |                                                         |                                                                 |                                                                     |
|--------------------------------------------|---------------------------------------------------------|-----------------------------------------------------------------|---------------------------------------------------------------------|
| Cystic lymphangioma                        | Lymphatic system disorders congenital                   | Blood and lymphatic system disorders congenital                 | Congenital, familial and genetic disorders                          |
| Extradural neoplasm                        | Nervous system neoplasms unspecified malignancy NEC     | Nervous system neoplasms malignant and unspecified NEC          | Neoplasms benign, malignant and unspecified (incl cysts and polyps) |
| Natural killer-cell lymphoblastic lymphoma | Precursor T-lymphoblastic lymphomas/leukaemias          | Lymphomas non-Hodgkin's T-cell                                  | Neoplasms benign, malignant and unspecified (incl cysts and polyps) |
| Superior vena cava occlusion               | Site specific necrosis and vascular insufficiency NEC   | Arteriosclerosis, stenosis, vascular insufficiency and necrosis | Vascular disorders                                                  |
| Acute myeloid leukaemia recurrent          | Leukaemias acute myeloid                                | Leukaemias                                                      | Neoplasms benign, malignant and unspecified (incl cysts and polyps) |
| Amyloidoma                                 | Soft tissue neoplasms benign NEC                        | Soft tissue neoplasms benign                                    | Neoplasms benign, malignant and unspecified (incl cysts and polyps) |
| Neoplasm swelling                          | Oncologic complications and emergencies                 | Neoplasm related morbidities                                    | Neoplasms benign, malignant and unspecified (incl cysts and polyps) |
| Blood chromogranin A increased             | Gastrointestinal, pancreatic and APUD hormone analyses  | Endocrine investigations (incl sex hormones)                    | Investigations                                                      |
| Haemorrhagic cyst                          | Mass conditions NEC                                     | Tissue disorders NEC                                            | General disorders and administration site conditions                |
| Biopsy spleen abnormal                     | Bone marrow and immune tissue histopathology procedures | Haematology investigations (incl blood groups)                  | Investigations                                                      |
| Leukaemic retinopathy                      | Leukaemias NEC                                          | Leukaemias                                                      | Neoplasms benign, malignant and unspecified (incl cysts and polyps) |
| Cerebellar haemangioma                     | Nervous system neoplasms benign NEC                     | Nervous system neoplasms benign                                 | Neoplasms benign, malignant and unspecified (incl cysts and polyps) |
| Metastases to central nervous system       | Metastases to specified sites                           | Metastases                                                      | Neoplasms benign, malignant and unspecified (incl cysts and polyps) |
| Anogenital warts                           | Skin neoplasms benign                                   | Cutaneous neoplasms benign                                      | Neoplasms benign, malignant and unspecified (incl cysts and polyps) |

|                                   |                                                                |                                                      |                                                                     |
|-----------------------------------|----------------------------------------------------------------|------------------------------------------------------|---------------------------------------------------------------------|
| Gallbladder cancer stage 0        | Gallbladder neoplasms malignant                                | Hepatobiliary neoplasms malignant and unspecified    | Neoplasms benign, malignant and unspecified (incl cysts and polyps) |
| Gallbladder cancer stage I        | Gallbladder neoplasms malignant                                | Hepatobiliary neoplasms malignant and unspecified    | Neoplasms benign, malignant and unspecified (incl cysts and polyps) |
| Hepatic cancer stage I            | Hepatic neoplasms malignant                                    | Hepatobiliary neoplasms malignant and unspecified    | Neoplasms benign, malignant and unspecified (incl cysts and polyps) |
| Hepatic cancer stage II           | Hepatic neoplasms malignant                                    | Hepatobiliary neoplasms malignant and unspecified    | Neoplasms benign, malignant and unspecified (incl cysts and polyps) |
| Pancreatic carcinoma stage 0      | Pancreatic neoplasms malignant (excl islet cell and carcinoid) | Gastrointestinal neoplasms malignant and unspecified | Neoplasms benign, malignant and unspecified (incl cysts and polyps) |
| Pancreatic carcinoma stage I      | Pancreatic neoplasms malignant (excl islet cell and carcinoid) | Gastrointestinal neoplasms malignant and unspecified | Neoplasms benign, malignant and unspecified (incl cysts and polyps) |
| Pancreatic carcinoma stage II     | Pancreatic neoplasms malignant (excl islet cell and carcinoid) | Gastrointestinal neoplasms malignant and unspecified | Neoplasms benign, malignant and unspecified (incl cysts and polyps) |
| Pancreatic carcinoma stage III    | Pancreatic neoplasms malignant (excl islet cell and carcinoid) | Gastrointestinal neoplasms malignant and unspecified | Neoplasms benign, malignant and unspecified (incl cysts and polyps) |
| Hepatic cancer stage III          | Hepatic neoplasms malignant                                    | Hepatobiliary neoplasms malignant and unspecified    | Neoplasms benign, malignant and unspecified (incl cysts and polyps) |
| Hepatic cancer stage IV           | Hepatic neoplasms malignant                                    | Hepatobiliary neoplasms malignant and unspecified    | Neoplasms benign, malignant and unspecified (incl cysts and polyps) |
| Pancreatic carcinoma stage IV     | Pancreatic neoplasms malignant (excl islet cell and carcinoid) | Gastrointestinal neoplasms malignant and unspecified | Neoplasms benign, malignant and unspecified (incl cysts and polyps) |
| Desmoid tumour                    | Soft tissue neoplasms benign NEC                               | Soft tissue neoplasms benign                         | Neoplasms benign, malignant and unspecified (incl cysts and polyps) |
| Infected lymphocele               | Vascular infections                                            | Infections - pathogen unspecified                    | Infections and infestations                                         |
| Small intestine carcinoma stage 0 | Small intestinal neoplasms malignant                           | Gastrointestinal neoplasms malignant and unspecified | Neoplasms benign, malignant and unspecified (incl cysts and polyps) |

|                                     |                                                           |                                                                 |                                                                     |
|-------------------------------------|-----------------------------------------------------------|-----------------------------------------------------------------|---------------------------------------------------------------------|
| Small intestine carcinoma stage I   | Small intestinal neoplasms malignant                      | Gastrointestinal neoplasms malignant and unspecified            | Neoplasms benign, malignant and unspecified (incl cysts and polyps) |
| Small intestine carcinoma stage II  | Small intestinal neoplasms malignant                      | Gastrointestinal neoplasms malignant and unspecified            | Neoplasms benign, malignant and unspecified (incl cysts and polyps) |
| Small intestine carcinoma stage III | Small intestinal neoplasms malignant                      | Gastrointestinal neoplasms malignant and unspecified            | Neoplasms benign, malignant and unspecified (incl cysts and polyps) |
| Small intestine carcinoma stage IV  | Small intestinal neoplasms malignant                      | Gastrointestinal neoplasms malignant and unspecified            | Neoplasms benign, malignant and unspecified (incl cysts and polyps) |
| Bile duct cancer stage I            | Bile duct neoplasms malignant                             | Hepatobiliary neoplasms malignant and unspecified               | Neoplasms benign, malignant and unspecified (incl cysts and polyps) |
| Bile duct cancer stage II           | Bile duct neoplasms malignant                             | Hepatobiliary neoplasms malignant and unspecified               | Neoplasms benign, malignant and unspecified (incl cysts and polyps) |
| Bile duct cancer stage III          | Bile duct neoplasms malignant                             | Hepatobiliary neoplasms malignant and unspecified               | Neoplasms benign, malignant and unspecified (incl cysts and polyps) |
| Bile duct cancer stage IV           | Bile duct neoplasms malignant                             | Hepatobiliary neoplasms malignant and unspecified               | Neoplasms benign, malignant and unspecified (incl cysts and polyps) |
| Bile duct cancer stage 0            | Bile duct neoplasms malignant                             | Hepatobiliary neoplasms malignant and unspecified               | Neoplasms benign, malignant and unspecified (incl cysts and polyps) |
| Acanthoma                           | Skin neoplasms benign                                     | Cutaneous neoplasms benign                                      | Neoplasms benign, malignant and unspecified (incl cysts and polyps) |
| Paraneoplastic syndrome             | Paraneoplastic syndromes NEC                              | Neoplasm related morbidities                                    | Neoplasms benign, malignant and unspecified (incl cysts and polyps) |
| Benign spleen tumour                | Haematologic neoplasms NEC                                | Haematopoietic neoplasms (excl leukaemias and lymphomas)        | Neoplasms benign, malignant and unspecified (incl cysts and polyps) |
| Buschke-Lowenstein's tumour         | Genitourinary neoplasms malignancy and gender unspecified | Reproductive and genitourinary neoplasms gender unspecified NEC | Neoplasms benign, malignant and unspecified (incl cysts and polyps) |
| Skin neoplasm excision              | Skin lesion excisions                                     | Skin and subcutaneous tissue therapeutic procedures             | Surgical and medical procedures                                     |

|                                                 |                                                                                 |                                                                        |                                                                     |
|-------------------------------------------------|---------------------------------------------------------------------------------|------------------------------------------------------------------------|---------------------------------------------------------------------|
| Stewart-Treves syndrome                         | Cardiovascular neoplasms malignant and unspecified                              | Miscellaneous and site unspecified neoplasms malignant and unspecified | Neoplasms benign, malignant and unspecified (incl cysts and polyps) |
| Palliative care                                 | Therapeutic procedures NEC                                                      | Therapeutic procedures and supportive care NEC                         | Surgical and medical procedures                                     |
| Small cell lung cancer metastatic               | Respiratory tract small cell carcinomas                                         | Respiratory and mediastinal neoplasms malignant and unspecified        | Neoplasms benign, malignant and unspecified (incl cysts and polyps) |
| Non-small cell lung cancer metastatic           | Non-small cell neoplasms malignant of the respiratory tract cell type specified | Respiratory and mediastinal neoplasms malignant and unspecified        | Neoplasms benign, malignant and unspecified (incl cysts and polyps) |
| Pleural mesothelioma malignant                  | Mesotheliomas malignant and unspecified                                         | Mesotheliomas                                                          | Neoplasms benign, malignant and unspecified (incl cysts and polyps) |
| Osteochondroma                                  | Cartilage neoplasms benign                                                      | Skeletal neoplasms benign                                              | Neoplasms benign, malignant and unspecified (incl cysts and polyps) |
| Penile squamous cell carcinoma                  | Penile neoplasms malignant                                                      | Reproductive neoplasms male malignant and unspecified                  | Neoplasms benign, malignant and unspecified (incl cysts and polyps) |
| Renal cyst haemorrhage                          | Renal neoplasms                                                                 | Renal disorders (excl nephropathies)                                   | Renal and urinary disorders                                         |
| Proctocolectomy                                 | Large intestine therapeutic procedures                                          | Gastrointestinal therapeutic procedures                                | Surgical and medical procedures                                     |
| Squamous cell carcinoma of head and neck        | Neoplasms malignant site unspecified NEC                                        | Miscellaneous and site unspecified neoplasms malignant and unspecified | Neoplasms benign, malignant and unspecified (incl cysts and polyps) |
| Plasma cell leukaemia in remission              | Plasma cell myelomas                                                            | Plasma cell neoplasms                                                  | Neoplasms benign, malignant and unspecified (incl cysts and polyps) |
| Intravascular papillary endothelial hyperplasia | Cardiovascular neoplasms benign                                                 | Miscellaneous and site unspecified neoplasms benign                    | Neoplasms benign, malignant and unspecified (incl cysts and polyps) |
| Skin neoplasm bleeding                          | Skin neoplasms malignant and unspecified (excl melanoma)                        | Skin neoplasms malignant and unspecified                               | Neoplasms benign, malignant and unspecified (incl cysts and polyps) |
| Nasal neoplasm                                  | Paranasal sinus and nasal cavity neoplasms malignant and unspecified            | Respiratory and mediastinal neoplasms malignant and unspecified        | Neoplasms benign, malignant and unspecified (incl cysts and polyps) |
| Haemorrhagic ovarian cyst                       | Ovarian and fallopian tube cysts and neoplasms                                  | Ovarian and fallopian tube disorders                                   | Reproductive system and breast disorders                            |

|                                               |                                                           |                                                                        |                                                                     |
|-----------------------------------------------|-----------------------------------------------------------|------------------------------------------------------------------------|---------------------------------------------------------------------|
| Erdheim-Chester disease                       | Histiocytoses                                             | Haematopoietic neoplasms (excl leukaemias and lymphomas)               | Neoplasms benign, malignant and unspecified (incl cysts and polyps) |
| Necrolytic migratory erythema                 | Erythemas                                                 | Epidermal and dermal conditions                                        | Skin and subcutaneous tissue disorders                              |
| Gastric adenoma                               | Upper gastrointestinal neoplasms benign                   | Gastrointestinal neoplasms benign                                      | Neoplasms benign, malignant and unspecified (incl cysts and polyps) |
| Prostate cancer                               | Prostatic neoplasms malignant                             | Reproductive neoplasms male malignant and unspecified                  | Neoplasms benign, malignant and unspecified (incl cysts and polyps) |
| Monoclonal gammopathy                         | Plasma cell neoplasms NEC                                 | Plasma cell neoplasms                                                  | Neoplasms benign, malignant and unspecified (incl cysts and polyps) |
| Trousseau's syndrome                          | Non-site specific embolism and thrombosis                 | Embolism and thrombosis                                                | Vascular disorders                                                  |
| Precursor B-lymphoblastic lymphoma recurrent  | Precursor B-lymphoblastic lymphomas                       | Lymphomas non-Hodgkin's B-cell                                         | Neoplasms benign, malignant and unspecified (incl cysts and polyps) |
| Precursor B-lymphoblastic lymphoma refractory | Precursor B-lymphoblastic lymphomas                       | Lymphomas non-Hodgkin's B-cell                                         | Neoplasms benign, malignant and unspecified (incl cysts and polyps) |
| Abdominal neoplasm                            | Neoplasms unspecified malignancy and site unspecified NEC | Miscellaneous and site unspecified neoplasms malignant and unspecified | Neoplasms benign, malignant and unspecified (incl cysts and polyps) |
| Acute leukaemia in remission                  | Leukaemias acute NEC                                      | Leukaemias                                                             | Neoplasms benign, malignant and unspecified (incl cysts and polyps) |
| Astrocytoma malignant                         | Glial tumours malignant                                   | Nervous system neoplasms malignant and unspecified NEC                 | Neoplasms benign, malignant and unspecified (incl cysts and polyps) |
| Granular cell tumour                          | Neoplasms unspecified malignancy and site unspecified NEC | Miscellaneous and site unspecified neoplasms malignant and unspecified | Neoplasms benign, malignant and unspecified (incl cysts and polyps) |
| Benign anorectal neoplasm                     | Lower gastrointestinal neoplasms benign                   | Gastrointestinal neoplasms benign                                      | Neoplasms benign, malignant and unspecified (incl cysts and polyps) |
| Benign bone neoplasm                          | Bone neoplasms benign (excl cysts)                        | Skeletal neoplasms benign                                              | Neoplasms benign, malignant and unspecified (incl cysts and polyps) |
| Benign endocrine neoplasm                     | Endocrine neoplasms benign NEC                            | Endocrine neoplasms benign                                             | Neoplasms benign, malignant and                                     |



|                                           |                                                    |                                                                   |                                                                     |
|-------------------------------------------|----------------------------------------------------|-------------------------------------------------------------------|---------------------------------------------------------------------|
|                                           |                                                    |                                                                   | unspecified (incl cysts and polyps)                                 |
| Benign female reproductive tract neoplasm | Reproductive neoplasms female benign NEC           | Reproductive neoplasms female benign                              | Neoplasms benign, malignant and unspecified (incl cysts and polyps) |
| Benign gastrointestinal neoplasm          | Gastrointestinal neoplasms benign NEC              | Gastrointestinal neoplasms benign                                 | Neoplasms benign, malignant and unspecified (incl cysts and polyps) |
| Benign lymph node neoplasm                | Haematologic neoplasms NEC                         | Haematopoietic neoplasms (excl leukaemias and lymphomas)          | Neoplasms benign, malignant and unspecified (incl cysts and polyps) |
| Benign male reproductive tract neoplasm   | Reproductive neoplasms male benign NEC             | Reproductive neoplasms male benign                                | Neoplasms benign, malignant and unspecified (incl cysts and polyps) |
| Benign neoplasm                           | Neoplasms benign site unspecified NEC              | Miscellaneous and site unspecified neoplasms benign               | Neoplasms benign, malignant and unspecified (incl cysts and polyps) |
| Benign pancreatic neoplasm                | Gastrointestinal neoplasms benign NEC              | Gastrointestinal neoplasms benign                                 | Neoplasms benign, malignant and unspecified (incl cysts and polyps) |
| Benign renal neoplasm                     | Renal neoplasms benign                             | Renal and urinary tract neoplasms benign                          | Neoplasms benign, malignant and unspecified (incl cysts and polyps) |
| Benign respiratory tract neoplasm         | Respiratory tract and pleural neoplasms benign NEC | Respiratory and mediastinal neoplasms benign (excl mesotheliomas) | Neoplasms benign, malignant and unspecified (incl cysts and polyps) |
| Benign small intestinal neoplasm          | Gastrointestinal neoplasms benign NEC              | Gastrointestinal neoplasms benign                                 | Neoplasms benign, malignant and unspecified (incl cysts and polyps) |
| Benign soft tissue neoplasm               | Soft tissue neoplasms benign NEC                   | Soft tissue neoplasms benign                                      | Neoplasms benign, malignant and unspecified (incl cysts and polyps) |
| Cardiac myxoma                            | Cardiovascular neoplasms benign                    | Miscellaneous and site unspecified neoplasms benign               | Neoplasms benign, malignant and unspecified (incl cysts and polyps) |
| Benign urinary tract neoplasm             | Urinary tract neoplasms benign                     | Renal and urinary tract neoplasms benign                          | Neoplasms benign, malignant and unspecified (incl cysts and polyps) |
| Benign uterine neoplasm                   | Uterine neoplasms benign                           | Reproductive neoplasms female benign                              | Neoplasms benign, malignant and unspecified (incl cysts and polyps) |

|                                             |                                                                        |                                                                           |                                                                        |
|---------------------------------------------|------------------------------------------------------------------------|---------------------------------------------------------------------------|------------------------------------------------------------------------|
| Brachytherapy                               | Radiotherapies site unspecified                                        | Therapeutic procedures and supportive care<br>NEC                         | Surgical and medical procedures                                        |
| Brain neoplasm                              | Nervous system neoplasms unspecified malignancy<br>NEC                 | Nervous system neoplasms malignant and<br>unspecified NEC                 | Neoplasms benign, malignant and<br>unspecified (incl cysts and polyps) |
| Breast cancer male                          | Breast and nipple neoplasms malignant                                  | Breast neoplasms malignant and unspecified<br>(incl nipple)               | Neoplasms benign, malignant and<br>unspecified (incl cysts and polyps) |
| Cardiac neoplasm malignant                  | Cardiovascular neoplasms malignant and unspecified                     | Miscellaneous and site unspecified neoplasms<br>malignant and unspecified | Neoplasms benign, malignant and<br>unspecified (incl cysts and polyps) |
| Thymoma malignant                           | Mediastinal neoplasms malignant                                        | Respiratory and mediastinal neoplasms<br>malignant and unspecified        | Neoplasms benign, malignant and<br>unspecified (incl cysts and polyps) |
| Chronic leukaemia in remission              | Leukaemias chronic NEC                                                 | Leukaemias                                                                | Neoplasms benign, malignant and<br>unspecified (incl cysts and polyps) |
| Colon neoplasm                              | Colorectal and anal neoplasms malignancy<br>unspecified                | Gastrointestinal neoplasms malignant and<br>unspecified                   | Neoplasms benign, malignant and<br>unspecified (incl cysts and polyps) |
| Connective tissue neoplasm                  | Soft tissue neoplasms malignant and unspecified NEC<br>(excl sarcomas) | Soft tissue neoplasms malignant and<br>unspecified                        | Neoplasms benign, malignant and<br>unspecified (incl cysts and polyps) |
| Cranial nerve neoplasm benign               | Nervous system neoplasms benign NEC                                    | Nervous system neoplasms benign                                           | Neoplasms benign, malignant and<br>unspecified (incl cysts and polyps) |
| Ectopic hormone secretion                   | Ectopic endocrine disorders                                            | Neoplastic and ectopic endocrinopathies                                   | Endocrine disorders                                                    |
| Endocrine neoplasm                          | Endocrine neoplasms malignant and unspecified NEC                      | Endocrine neoplasms malignant and<br>unspecified                          | Neoplasms benign, malignant and<br>unspecified (incl cysts and polyps) |
| Endocrine neoplasm malignant                | Endocrine neoplasms malignant and unspecified NEC                      | Endocrine neoplasms malignant and<br>unspecified                          | Neoplasms benign, malignant and<br>unspecified (incl cysts and polyps) |
| Female reproductive neoplasm                | Female reproductive neoplasms unspecified<br>malignancy                | Reproductive neoplasms female malignant and<br>unspecified                | Neoplasms benign, malignant and<br>unspecified (incl cysts and polyps) |
| Female reproductive tract carcinoma in situ | Female reproductive neoplasms malignant NEC                            | Reproductive neoplasms female malignant and<br>unspecified                | Neoplasms benign, malignant and<br>unspecified (incl cysts and polyps) |

|                                                       |                                                                   |                                                                        |                                                                     |
|-------------------------------------------------------|-------------------------------------------------------------------|------------------------------------------------------------------------|---------------------------------------------------------------------|
| Gastrointestinal carcinoma in situ                    | Gastrointestinal neoplasms malignant NEC                          | Gastrointestinal neoplasms malignant and unspecified                   | Neoplasms benign, malignant and unspecified (incl cysts and polyps) |
| Follicle centre lymphoma, follicular grade I, II, III | Follicle centre lymphomas, follicular grade I, II, III            | Lymphomas non-Hodgkin's B-cell                                         | Neoplasms benign, malignant and unspecified (incl cysts and polyps) |
| Gastrointestinal neoplasm                             | Gastrointestinal neoplasms malignancy unspecified NEC             | Gastrointestinal neoplasms malignant and unspecified                   | Neoplasms benign, malignant and unspecified (incl cysts and polyps) |
| Genitourinary tract neoplasm                          | Genitourinary neoplasms malignancy and gender unspecified         | Reproductive and genitourinary neoplasms gender unspecified NEC        | Neoplasms benign, malignant and unspecified (incl cysts and polyps) |
| Germ cell cancer                                      | Germ cell neoplasms site unspecified NEC                          | Miscellaneous and site unspecified neoplasms malignant and unspecified | Neoplasms benign, malignant and unspecified (incl cysts and polyps) |
| Haematopoietic neoplasm                               | Haematologic neoplasms NEC                                        | Haematopoietic neoplasms (excl leukaemias and lymphomas)               | Neoplasms benign, malignant and unspecified (incl cysts and polyps) |
| Hamartoma                                             | Congenital disorders NEC                                          | Congenital and hereditary disorders NEC                                | Congenital, familial and genetic disorders                          |
| Hepatobiliary neoplasm                                | Hepatobiliary neoplasms malignancy unspecified                    | Hepatobiliary neoplasms malignant and unspecified                      | Neoplasms benign, malignant and unspecified (incl cysts and polyps) |
| Leukaemia in remission                                | Leukaemias NEC                                                    | Leukaemias                                                             | Neoplasms benign, malignant and unspecified (incl cysts and polyps) |
| Lymphoproliferative disorder                          | Lymphoproliferative disorders NEC (excl leukaemias and lymphomas) | Haematopoietic neoplasms (excl leukaemias and lymphomas)               | Neoplasms benign, malignant and unspecified (incl cysts and polyps) |
| Lymphoproliferative disorder in remission             | Lymphoproliferative disorders NEC (excl leukaemias and lymphomas) | Haematopoietic neoplasms (excl leukaemias and lymphomas)               | Neoplasms benign, malignant and unspecified (incl cysts and polyps) |
| Male reproductive tract neoplasm                      | Reproductive neoplasms male unspecified malignancy                | Reproductive neoplasms male malignant and unspecified                  | Neoplasms benign, malignant and unspecified (incl cysts and polyps) |
| Malignant anorectal neoplasm                          | Colorectal neoplasms malignant                                    | Gastrointestinal neoplasms malignant and unspecified                   | Neoplasms benign, malignant and unspecified (incl cysts and polyps) |
| Malignant cranial nerve neoplasm                      | Central nervous system neoplasms malignant NEC                    | Nervous system neoplasms malignant and unspecified NEC                 | Neoplasms benign, malignant and unspecified (incl cysts and polyps) |

|                                      |                                                                             |                                                                        |                                                                     |
|--------------------------------------|-----------------------------------------------------------------------------|------------------------------------------------------------------------|---------------------------------------------------------------------|
| Malignant lymphoid neoplasm          | Lymphomas unspecified NEC                                                   | Lymphomas NEC                                                          | Neoplasms benign, malignant and unspecified (incl cysts and polyps) |
| Malignant mediastinal neoplasm       | Mediastinal neoplasms malignant                                             | Respiratory and mediastinal neoplasms malignant and unspecified        | Neoplasms benign, malignant and unspecified (incl cysts and polyps) |
| Intraocular melanoma                 | Ocular melanomas                                                            | Ocular neoplasms                                                       | Neoplasms benign, malignant and unspecified (incl cysts and polyps) |
| Lacrimal cyst                        | Ocular cysts and polyps                                                     | Ocular neoplasms                                                       | Eye disorders                                                       |
| Malignant middle ear neoplasm        | Aural neoplasms malignant and unspecified                                   | Miscellaneous and site unspecified neoplasms malignant and unspecified | Neoplasms benign, malignant and unspecified (incl cysts and polyps) |
| Malignant nervous system neoplasm    | Nervous system neoplasms malignant NEC                                      | Nervous system neoplasms malignant and unspecified NEC                 | Neoplasms benign, malignant and unspecified (incl cysts and polyps) |
| Malignant peritoneal neoplasm        | Gastrointestinal neoplasms malignant NEC                                    | Gastrointestinal neoplasms malignant and unspecified                   | Neoplasms benign, malignant and unspecified (incl cysts and polyps) |
| Malignant respiratory tract neoplasm | Respiratory tract and pleural neoplasms malignant cell type unspecified NEC | Respiratory and mediastinal neoplasms malignant and unspecified        | Neoplasms benign, malignant and unspecified (incl cysts and polyps) |
| Malignant urinary tract neoplasm     | Urinary tract neoplasms malignant NEC                                       | Renal and urinary tract neoplasms malignant and unspecified            | Neoplasms benign, malignant and unspecified (incl cysts and polyps) |
| Mantle cell lymphoma                 | Mantle cell lymphomas                                                       | Lymphomas non-Hodgkin's B-cell                                         | Neoplasms benign, malignant and unspecified (incl cysts and polyps) |
| Meningeal neoplasm                   | Nervous system neoplasms unspecified malignancy NEC                         | Nervous system neoplasms malignant and unspecified NEC                 | Neoplasms benign, malignant and unspecified (incl cysts and polyps) |
| Nervous system neoplasm benign       | Nervous system neoplasms benign NEC                                         | Nervous system neoplasms benign                                        | Neoplasms benign, malignant and unspecified (incl cysts and polyps) |
| Metastases to nervous system         | Metastases to specified sites                                               | Metastases                                                             | Neoplasms benign, malignant and unspecified (incl cysts and polyps) |
| Metastases to reproductive organ     | Metastases to specified sites                                               | Metastases                                                             | Neoplasms benign, malignant and unspecified (incl cysts and polyps) |

|                                     |                                                                                 |                                                                        |                                                                     |
|-------------------------------------|---------------------------------------------------------------------------------|------------------------------------------------------------------------|---------------------------------------------------------------------|
| Metastatic neoplasm                 | Neoplasms malignant site unspecified NEC                                        | Miscellaneous and site unspecified neoplasms malignant and unspecified | Neoplasms benign, malignant and unspecified (incl cysts and polyps) |
| Monocytic leukaemia in remission    | Leukaemias myeloid NEC                                                          | Leukaemias                                                             | Neoplasms benign, malignant and unspecified (incl cysts and polyps) |
| Myeloid leukaemia in remission      | Leukaemias myeloid NEC                                                          | Leukaemias                                                             | Neoplasms benign, malignant and unspecified (incl cysts and polyps) |
| Nasopharyngeal cancer               | Oropharyngeal, nasopharyngeal and tonsillar neoplasms malignant and unspecified | Respiratory and mediastinal neoplasms malignant and unspecified        | Neoplasms benign, malignant and unspecified (incl cysts and polyps) |
| Neoplasm progression                | Neoplasms unspecified malignancy and site unspecified NEC                       | Miscellaneous and site unspecified neoplasms malignant and unspecified | Neoplasms benign, malignant and unspecified (incl cysts and polyps) |
| Nervous system neoplasm             | Nervous system neoplasms unspecified malignancy NEC                             | Nervous system neoplasms malignant and unspecified NEC                 | Neoplasms benign, malignant and unspecified (incl cysts and polyps) |
| Oral neoplasm                       | Lip and oral cavity neoplasms malignancy unspecified                            | Gastrointestinal neoplasms malignant and unspecified                   | Neoplasms benign, malignant and unspecified (incl cysts and polyps) |
| Ovarian epithelial cancer           | Ovarian neoplasms malignant (excl germ cell)                                    | Reproductive neoplasms female malignant and unspecified                | Neoplasms benign, malignant and unspecified (incl cysts and polyps) |
| Paraganglion neoplasm               | Endocrine neoplasms malignant and unspecified NEC                               | Endocrine neoplasms malignant and unspecified                          | Neoplasms benign, malignant and unspecified (incl cysts and polyps) |
| Paraproteinaemia                    | Plasma cell neoplasms NEC                                                       | Plasma cell neoplasms                                                  | Neoplasms benign, malignant and unspecified (incl cysts and polyps) |
| Pelvic neoplasm                     | Neoplasms unspecified malignancy and site unspecified NEC                       | Miscellaneous and site unspecified neoplasms malignant and unspecified | Neoplasms benign, malignant and unspecified (incl cysts and polyps) |
| Peripheral neuroepithelioma of bone | Bone sarcomas                                                                   | Skeletal neoplasms malignant and unspecified                           | Neoplasms benign, malignant and unspecified (incl cysts and polyps) |
| Peritoneal neoplasm                 | Gastrointestinal neoplasms malignancy unspecified NEC                           | Gastrointestinal neoplasms malignant and unspecified                   | Neoplasms benign, malignant and unspecified (incl cysts and polyps) |
| Pineal neoplasm                     | Pineal neoplasms                                                                | Nervous system neoplasms malignant and unspecified NEC                 | Neoplasms benign, malignant and unspecified (incl cysts and polyps) |

|                                 |                                                                     |                                                                        |                                                                     |
|---------------------------------|---------------------------------------------------------------------|------------------------------------------------------------------------|---------------------------------------------------------------------|
| Placental neoplasm              | Female reproductive neoplasms unspecified malignancy                | Reproductive neoplasms female malignant and unspecified                | Neoplasms benign, malignant and unspecified (incl cysts and polyps) |
| Pleural neoplasm                | Respiratory tract and pleural neoplasms malignancy unspecified NEC  | Respiratory and mediastinal neoplasms malignant and unspecified        | Neoplasms benign, malignant and unspecified (incl cysts and polyps) |
| Tendon neoplasm                 | Soft tissue neoplasms malignant and unspecified NEC (excl sarcomas) | Soft tissue neoplasms malignant and unspecified                        | Neoplasms benign, malignant and unspecified (incl cysts and polyps) |
| Testicular germ cell cancer     | Testicular neoplasms malignant                                      | Reproductive neoplasms male malignant and unspecified                  | Neoplasms benign, malignant and unspecified (incl cysts and polyps) |
| Testicular neoplasm             | Reproductive neoplasms male unspecified malignancy                  | Reproductive neoplasms male malignant and unspecified                  | Neoplasms benign, malignant and unspecified (incl cysts and polyps) |
| Tumour excision                 | Therapeutic procedures NEC                                          | Therapeutic procedures and supportive care NEC                         | Surgical and medical procedures                                     |
| Urinary tract carcinoma in situ | Urinary tract neoplasms malignant NEC                               | Renal and urinary tract neoplasms malignant and unspecified            | Neoplasms benign, malignant and unspecified (incl cysts and polyps) |
| Urinary tract neoplasm          | Urinary tract neoplasms unspecified malignancy NEC                  | Renal and urinary tract neoplasms malignant and unspecified            | Neoplasms benign, malignant and unspecified (incl cysts and polyps) |
| Anal cancer                     | Anal canal neoplasms malignant                                      | Gastrointestinal neoplasms malignant and unspecified                   | Neoplasms benign, malignant and unspecified (incl cysts and polyps) |
| Cerebral cyst                   | Nervous system cysts and polyps                                     | Nervous system neoplasms benign                                        | Nervous system disorders                                            |
| Carcinoma in situ               | Neoplasms malignant site unspecified NEC                            | Miscellaneous and site unspecified neoplasms malignant and unspecified | Neoplasms benign, malignant and unspecified (incl cysts and polyps) |
| Colorectal cancer               | Colorectal neoplasms malignant                                      | Gastrointestinal neoplasms malignant and unspecified                   | Neoplasms benign, malignant and unspecified (incl cysts and polyps) |
| Renal neoplasm                  | Urinary tract neoplasms unspecified malignancy NEC                  | Renal and urinary tract neoplasms malignant and unspecified            | Neoplasms benign, malignant and unspecified (incl cysts and polyps) |
| Respiratory tract neoplasm      | Respiratory tract and pleural neoplasms malignancy unspecified NEC  | Respiratory and mediastinal neoplasms malignant and unspecified        | Neoplasms benign, malignant and unspecified (incl cysts and polyps) |

|                                       |                                                      |                                                           |                                                                     |
|---------------------------------------|------------------------------------------------------|-----------------------------------------------------------|---------------------------------------------------------------------|
| Salivary gland neoplasm               | Salivary gland neoplasms unspecified malignancy      | Gastrointestinal neoplasms malignant and unspecified      | Neoplasms benign, malignant and unspecified (incl cysts and polyps) |
| Scan abnormal                         | Imaging procedures NEC                               | Investigations, imaging and histopathology procedures NEC | Investigations                                                      |
| Scan myocardial perfusion abnormal    | Cardiac imaging procedures                           | Cardiac and vascular investigations (excl enzyme tests)   | Investigations                                                      |
| Scan abdomen abnormal                 | Gastrointestinal and abdominal imaging procedures    | Gastrointestinal investigations                           | Investigations                                                      |
| Lip and/or oral cavity cancer         | Lip and oral cavity neoplasms malignant              | Gastrointestinal neoplasms malignant and unspecified      | Neoplasms benign, malignant and unspecified (incl cysts and polyps) |
| Malignant mesenchymoma                | Mesenchymomas malignant                              | Soft tissue neoplasms malignant and unspecified           | Neoplasms benign, malignant and unspecified (incl cysts and polyps) |
| Neurofibrosarcoma                     | Neurofibrosarcomas                                   | Soft tissue neoplasms malignant and unspecified           | Neoplasms benign, malignant and unspecified (incl cysts and polyps) |
| Polyp                                 | Mucosal findings abnormal                            | General system disorders NEC                              | General disorders and administration site conditions                |
| Oesophageal squamous cell carcinoma   | Oesophageal neoplasms malignant                      | Gastrointestinal neoplasms malignant and unspecified      | Neoplasms benign, malignant and unspecified (incl cysts and polyps) |
| Ovarian neoplasm                      | Female reproductive neoplasms unspecified malignancy | Reproductive neoplasms female malignant and unspecified   | Neoplasms benign, malignant and unspecified (incl cysts and polyps) |
| Pineal parenchymal neoplasm malignant | Pineal neoplasms                                     | Nervous system neoplasms malignant and unspecified NEC    | Neoplasms benign, malignant and unspecified (incl cysts and polyps) |
| Pituitary tumour benign               | Endocrine neoplasms benign NEC                       | Endocrine neoplasms benign                                | Neoplasms benign, malignant and unspecified (incl cysts and polyps) |
| Radiotherapy to brain                 | Brain radiotherapies                                 | Nervous system, skull and spine therapeutic procedures    | Surgical and medical procedures                                     |
| Radiotherapy to lung                  | Pulmonary radiotherapies                             | Respiratory tract therapeutic procedures                  | Surgical and medical procedures                                     |
| Radiotherapy to prostate              | Prostatic radiotherapies                             | Male genital tract therapeutic procedures                 | Surgical and medical procedures                                     |

|                                      |                                                           |                                                                        |                                                                     |
|--------------------------------------|-----------------------------------------------------------|------------------------------------------------------------------------|---------------------------------------------------------------------|
| Radiotherapy to skin                 | Skin radiotherapies                                       | Skin and subcutaneous tissue therapeutic procedures                    | Surgical and medical procedures                                     |
| Radiotherapy to urinary bladder      | Bladder radiotherapies                                    | Renal and urinary tract therapeutic procedures                         | Surgical and medical procedures                                     |
| Radiotherapy to uterus               | Uterine radiotherapies                                    | Obstetric and gynaecological therapeutic procedures                    | Surgical and medical procedures                                     |
| Adrenal neoplasm                     | Endocrine neoplasms malignant and unspecified NEC         | Endocrine neoplasms malignant and unspecified                          | Neoplasms benign, malignant and unspecified (incl cysts and polyps) |
| Hodgkin's disease stage IV           | Hodgkin's disease NEC                                     | Lymphomas Hodgkin's disease                                            | Neoplasms benign, malignant and unspecified (incl cysts and polyps) |
| Metastases to the respiratory system | Metastases to specified sites                             | Metastases                                                             | Neoplasms benign, malignant and unspecified (incl cysts and polyps) |
| Ultrasound scan abnormal             | Imaging procedures NEC                                    | Investigations, imaging and histopathology procedures NEC              | Investigations                                                      |
| Abdominal wall neoplasm              | Gastrointestinal neoplasms malignancy unspecified NEC     | Gastrointestinal neoplasms malignant and unspecified                   | Neoplasms benign, malignant and unspecified (incl cysts and polyps) |
| Anal neoplasm                        | Colorectal and anal neoplasms malignancy unspecified      | Gastrointestinal neoplasms malignant and unspecified                   | Neoplasms benign, malignant and unspecified (incl cysts and polyps) |
| Benign mesothelioma                  | Mesotheliomas benign                                      | Mesotheliomas                                                          | Neoplasms benign, malignant and unspecified (incl cysts and polyps) |
| Benign muscle neoplasm               | Soft tissue neoplasms benign NEC                          | Soft tissue neoplasms benign                                           | Neoplasms benign, malignant and unspecified (incl cysts and polyps) |
| Breast lump removal                  | Breast neoplasm removal                                   | Breast therapeutic procedures                                          | Surgical and medical procedures                                     |
| Cartilage neoplasm                   | Neoplasms unspecified malignancy and site unspecified NEC | Miscellaneous and site unspecified neoplasms malignant and unspecified | Neoplasms benign, malignant and unspecified (incl cysts and polyps) |
| Cerebellar tumour                    | Nervous system neoplasms unspecified malignancy NEC       | Nervous system neoplasms malignant and unspecified NEC                 | Neoplasms benign, malignant and unspecified (incl cysts and polyps) |
| Chemotherapy                         | Chemotherapies                                            | Therapeutic procedures and supportive care                             | Surgical and medical procedures                                     |



|                                                      |                                                              |                                                                        |                                                                     |
|------------------------------------------------------|--------------------------------------------------------------|------------------------------------------------------------------------|---------------------------------------------------------------------|
|                                                      |                                                              | NEC                                                                    |                                                                     |
| Colectomy                                            | Large intestine therapeutic procedures                       | Gastrointestinal therapeutic procedures                                | Surgical and medical procedures                                     |
| Corneal cyst                                         | Ocular cysts and polyps                                      | Ocular neoplasms                                                       | Eye disorders                                                       |
| Cyst rupture                                         | Mass conditions NEC                                          | Tissue disorders NEC                                                   | General disorders and administration site conditions                |
| Cervix carcinoma stage 0                             | Cervix neoplasms malignant                                   | Reproductive neoplasms female malignant and unspecified                | Neoplasms benign, malignant and unspecified (incl cysts and polyps) |
| Duodenal neoplasm                                    | Gastrointestinal neoplasms malignancy unspecified NEC        | Gastrointestinal neoplasms malignant and unspecified                   | Neoplasms benign, malignant and unspecified (incl cysts and polyps) |
| Electron radiation therapy                           | Radiotherapies site unspecified                              | Therapeutic procedures and supportive care NEC                         | Surgical and medical procedures                                     |
| Extragonadal primary malignant teratoma              | Extragonadal primary germ cell neoplasms                     | Miscellaneous and site unspecified neoplasms malignant and unspecified | Neoplasms benign, malignant and unspecified (incl cysts and polyps) |
| Extragonadal primary non-seminoma                    | Extragonadal primary germ cell neoplasms                     | Miscellaneous and site unspecified neoplasms malignant and unspecified | Neoplasms benign, malignant and unspecified (incl cysts and polyps) |
| Extranodal marginal zone B-cell lymphoma (MALT type) | Extranodal marginal zone B-cell lymphomas (low grade B-cell) | Lymphomas non-Hodgkin's B-cell                                         | Neoplasms benign, malignant and unspecified (incl cysts and polyps) |
| Fallopian tube neoplasm                              | Female reproductive neoplasms unspecified malignancy         | Reproductive neoplasms female malignant and unspecified                | Neoplasms benign, malignant and unspecified (incl cysts and polyps) |
| Neoplasm of orbit                                    | Ocular neoplasms malignancy unspecified                      | Ocular neoplasms                                                       | Neoplasms benign, malignant and unspecified (incl cysts and polyps) |
| Neoplasm recurrence                                  | Neoplasms unspecified malignancy and site unspecified NEC    | Miscellaneous and site unspecified neoplasms malignant and unspecified | Neoplasms benign, malignant and unspecified (incl cysts and polyps) |
| Non-Hodgkin's lymphoma transformed recurrent         | Non-Hodgkin's lymphomas transformed recurrent                | Lymphomas non-Hodgkin's unspecified histology                          | Neoplasms benign, malignant and unspecified (incl cysts and polyps) |
| Non-renal cell carcinoma of kidney                   | Renal neoplasms malignant                                    | Renal and urinary tract neoplasms malignant and unspecified            | Neoplasms benign, malignant and unspecified (incl cysts and polyps) |

|                                                     |                                                                                 |                                                                 |                                                                     |
|-----------------------------------------------------|---------------------------------------------------------------------------------|-----------------------------------------------------------------|---------------------------------------------------------------------|
| Non-small cell lung cancer                          | Non-small cell neoplasms malignant of the respiratory tract cell type specified | Respiratory and mediastinal neoplasms malignant and unspecified | Neoplasms benign, malignant and unspecified (incl cysts and polyps) |
| Oesophageal neoplasm                                | Oesophageal neoplasms malignancy unspecified                                    | Gastrointestinal neoplasms malignant and unspecified            | Neoplasms benign, malignant and unspecified (incl cysts and polyps) |
| Oophorectomy                                        | Ovarian therapeutic procedures                                                  | Obstetric and gynaecological therapeutic procedures             | Surgical and medical procedures                                     |
| Ovarian germ cell cancer                            | Ovarian germ cell neoplasms malignant                                           | Reproductive neoplasms female malignant and unspecified         | Neoplasms benign, malignant and unspecified (incl cysts and polyps) |
| Ovarian germ cell cancer stage I                    | Ovarian germ cell neoplasms malignant                                           | Reproductive neoplasms female malignant and unspecified         | Neoplasms benign, malignant and unspecified (incl cysts and polyps) |
| Ovarian germ cell cancer stage II                   | Ovarian germ cell neoplasms malignant                                           | Reproductive neoplasms female malignant and unspecified         | Neoplasms benign, malignant and unspecified (incl cysts and polyps) |
| Ovarian germ cell cancer stage III                  | Ovarian germ cell neoplasms malignant                                           | Reproductive neoplasms female malignant and unspecified         | Neoplasms benign, malignant and unspecified (incl cysts and polyps) |
| Ovarian germ cell cancer stage IV                   | Ovarian germ cell neoplasms malignant                                           | Reproductive neoplasms female malignant and unspecified         | Neoplasms benign, malignant and unspecified (incl cysts and polyps) |
| Pancreatic neoplasm                                 | Gastrointestinal neoplasms malignancy unspecified NEC                           | Gastrointestinal neoplasms malignant and unspecified            | Neoplasms benign, malignant and unspecified (incl cysts and polyps) |
| Paranasal sinus and nasal cavity malignant neoplasm | Paranasal sinus and nasal cavity neoplasms malignant and unspecified            | Respiratory and mediastinal neoplasms malignant and unspecified | Neoplasms benign, malignant and unspecified (incl cysts and polyps) |
| Penile neoplasm                                     | Reproductive neoplasms male unspecified malignancy                              | Reproductive neoplasms male malignant and unspecified           | Neoplasms benign, malignant and unspecified (incl cysts and polyps) |
| Prostatectomy                                       | Prostatic therapeutic procedures                                                | Male genital tract therapeutic procedures                       | Surgical and medical procedures                                     |
| Radioisotope scan abnormal                          | Imaging procedures NEC                                                          | Investigations, imaging and histopathology procedures NEC       | Investigations                                                      |
| Salivary gland cancer                               | Salivary gland neoplasms malignant                                              | Gastrointestinal neoplasms malignant and unspecified            | Neoplasms benign, malignant and unspecified (incl cysts and polyps) |

|                                                      |                                                            |                                                                        |                                                                     |
|------------------------------------------------------|------------------------------------------------------------|------------------------------------------------------------------------|---------------------------------------------------------------------|
| Scan adrenal gland abnormal                          | Endocrine analyses and imaging NEC                         | Endocrine investigations (incl sex hormones)                           | Investigations                                                      |
| Bone scan abnormal                                   | Musculoskeletal and soft tissue imaging procedures         | Musculoskeletal and soft tissue investigations (excl enzyme tests)     | Investigations                                                      |
| Brain scan abnormal                                  | Central nervous system imaging procedures                  | Neurological, special senses and psychiatric investigations            | Investigations                                                      |
| Liver scan abnormal                                  | Hepatobiliary imaging procedures                           | Hepatobiliary investigations                                           | Investigations                                                      |
| Lymph nodes scan abnormal                            | Bone marrow and immune tissue imaging procedures           | Haematology investigations (incl blood groups)                         | Investigations                                                      |
| Parathyroid scan abnormal                            | Endocrine analyses and imaging NEC                         | Endocrine investigations (incl sex hormones)                           | Investigations                                                      |
| Renal scan abnormal                                  | Urinary tract imaging procedures                           | Renal and urinary tract investigations and urinalyses                  | Investigations                                                      |
| Salivary gland scan abnormal                         | Gastrointestinal and abdominal imaging procedures          | Gastrointestinal investigations                                        | Investigations                                                      |
| Follicle centre lymphoma diffuse small cell lymphoma | Follicle centre lymphomas diffuse predominantly small cell | Lymphomas non-Hodgkin's B-cell                                         | Neoplasms benign, malignant and unspecified (incl cysts and polyps) |
| Gamma radiation therapy                              | Radiotherapies site unspecified                            | Therapeutic procedures and supportive care NEC                         | Surgical and medical procedures                                     |
| Gastrectomy                                          | Gastric therapeutic procedures                             | Gastrointestinal therapeutic procedures                                | Surgical and medical procedures                                     |
| Gastric cancer stage IV                              | Gastric neoplasms malignant                                | Gastrointestinal neoplasms malignant and unspecified                   | Neoplasms benign, malignant and unspecified (incl cysts and polyps) |
| Gastric neoplasm                                     | Gastrointestinal neoplasms malignancy unspecified NEC      | Gastrointestinal neoplasms malignant and unspecified                   | Neoplasms benign, malignant and unspecified (incl cysts and polyps) |
| Gestational trophoblastic tumour                     | Germ cell neoplasms site unspecified NEC                   | Miscellaneous and site unspecified neoplasms malignant and unspecified | Neoplasms benign, malignant and unspecified (incl cysts and polyps) |
| Hepatectomy                                          | Hepatic therapeutic procedures                             | Hepatobiliary therapeutic procedures                                   | Surgical and medical procedures                                     |
| Hepatoblastoma                                       | Hepatoblastomas                                            | Hepatobiliary neoplasms malignant and unspecified                      | Neoplasms benign, malignant and unspecified (incl cysts and polyps) |

|                                    |                                                                             |                                                                 |                                                                     |
|------------------------------------|-----------------------------------------------------------------------------|-----------------------------------------------------------------|---------------------------------------------------------------------|
| Intestinal cyst                    | Benign neoplasms gastrointestinal (excl oral cavity)                        | Benign neoplasms gastrointestinal                               | Gastrointestinal disorders                                          |
| Leukoplakia                        | Skin preneoplastic conditions NEC                                           | Cornification and dystrophic skin disorders                     | Skin and subcutaneous tissue disorders                              |
| Lip neoplasm                       | Lip and oral cavity neoplasms malignancy unspecified                        | Gastrointestinal neoplasms malignant and unspecified            | Neoplasms benign, malignant and unspecified (incl cysts and polyps) |
| Lung infiltration malignant        | Respiratory tract and pleural neoplasms malignant cell type unspecified NEC | Respiratory and mediastinal neoplasms malignant and unspecified | Neoplasms benign, malignant and unspecified (incl cysts and polyps) |
| Lung neoplasm                      | Respiratory tract and pleural neoplasms malignancy unspecified NEC          | Respiratory and mediastinal neoplasms malignant and unspecified | Neoplasms benign, malignant and unspecified (incl cysts and polyps) |
| Lymphatic system neoplasm          | Haematologic neoplasms NEC                                                  | Haematopoietic neoplasms (excl leukaemias and lymphomas)        | Neoplasms benign, malignant and unspecified (incl cysts and polyps) |
| Lymphocyte morphology abnormal     | White blood cell analyses                                                   | Haematology investigations (incl blood groups)                  | Investigations                                                      |
| Malignant muscle neoplasm          | Soft tissue sarcomas histology unspecified                                  | Soft tissue neoplasms malignant and unspecified                 | Neoplasms benign, malignant and unspecified (incl cysts and polyps) |
| Malignant nipple neoplasm          | Breast and nipple neoplasms malignant                                       | Breast neoplasms malignant and unspecified (incl nipple)        | Neoplasms benign, malignant and unspecified (incl cysts and polyps) |
| Penile operation                   | Penile therapeutic procedures                                               | Male genital tract therapeutic procedures                       | Surgical and medical procedures                                     |
| Peripheral nervous system neoplasm | Nervous system neoplasms unspecified malignancy NEC                         | Nervous system neoplasms malignant and unspecified NEC          | Neoplasms benign, malignant and unspecified (incl cysts and polyps) |
| Pharyngeal neoplasm                | Pharyngeal neoplasms malignant and unspecified                              | Respiratory and mediastinal neoplasms malignant and unspecified | Neoplasms benign, malignant and unspecified (incl cysts and polyps) |
| Photon radiation therapy           | Radiotherapies site unspecified                                             | Therapeutic procedures and supportive care NEC                  | Surgical and medical procedures                                     |
| Radiotherapy to blood              | Haematological radiotherapies                                               | Haematological and lymphoid tissue therapeutic procedures       | Surgical and medical procedures                                     |
| Radiotherapy to bone               | Bone radiotherapies                                                         | Bone and joint therapeutic procedures                           | Surgical and medical procedures                                     |
| Radiotherapy to breast             | Breast radiotherapies                                                       | Breast therapeutic procedures                                   | Surgical and medical procedures                                     |

|                                        |                                                                                 |                                                                 |                                                                     |
|----------------------------------------|---------------------------------------------------------------------------------|-----------------------------------------------------------------|---------------------------------------------------------------------|
| Radiotherapy to ear                    | Ear, nose and throat radiotherapies                                             | Head and neck therapeutic procedures                            | Surgical and medical procedures                                     |
| Radiotherapy to gastrointestinal tract | Gastrointestinal radiotherapies                                                 | Gastrointestinal therapeutic procedures                         | Surgical and medical procedures                                     |
| Radiotherapy to liver                  | Hepatobiliary radiotherapies                                                    | Hepatobiliary therapeutic procedures                            | Surgical and medical procedures                                     |
| Radiotherapy to nose                   | Ear, nose and throat radiotherapies                                             | Head and neck therapeutic procedures                            | Surgical and medical procedures                                     |
| Radiotherapy to pancreas               | Pancreatic radiotherapies                                                       | Gastrointestinal therapeutic procedures                         | Surgical and medical procedures                                     |
| Radiotherapy to soft tissue            | Soft tissue radiotherapies                                                      | Soft tissue therapeutic procedures                              | Surgical and medical procedures                                     |
| Radiotherapy to throat                 | Ear, nose and throat radiotherapies                                             | Head and neck therapeutic procedures                            | Surgical and medical procedures                                     |
| Radiotherapy to thyroid                | Thyroid radiotherapies                                                          | Endocrine gland therapeutic procedures                          | Surgical and medical procedures                                     |
| Rectal neoplasm                        | Colorectal and anal neoplasms malignancy unspecified                            | Gastrointestinal neoplasms malignant and unspecified            | Neoplasms benign, malignant and unspecified (incl cysts and polyps) |
| Splenic marginal zone lymphoma         | Splenic marginal zone lymphomas                                                 | Lymphomas non-Hodgkin's B-cell                                  | Neoplasms benign, malignant and unspecified (incl cysts and polyps) |
| Testicular choriocarcinoma             | Testicular neoplasms malignant                                                  | Reproductive neoplasms male malignant and unspecified           | Neoplasms benign, malignant and unspecified (incl cysts and polyps) |
| Testicular embryonal carcinoma         | Testicular neoplasms malignant                                                  | Reproductive neoplasms male malignant and unspecified           | Neoplasms benign, malignant and unspecified (incl cysts and polyps) |
| Testicular seminoma (pure)             | Testicular neoplasms malignant                                                  | Reproductive neoplasms male malignant and unspecified           | Neoplasms benign, malignant and unspecified (incl cysts and polyps) |
| Thyroidectomy                          | Thyroid therapeutic procedures                                                  | Endocrine gland therapeutic procedures                          | Surgical and medical procedures                                     |
| Tongue neoplasm                        | Lip and oral cavity neoplasms malignancy unspecified                            | Gastrointestinal neoplasms malignant and unspecified            | Neoplasms benign, malignant and unspecified (incl cysts and polyps) |
| Tonsillar neoplasm                     | Oropharyngeal, nasopharyngeal and tonsillar neoplasms malignant and unspecified | Respiratory and mediastinal neoplasms malignant and unspecified | Neoplasms benign, malignant and unspecified (incl cysts and polyps) |
| Tracheal neoplasm                      | Respiratory tract and pleural neoplasms malignancy unspecified NEC              | Respiratory and mediastinal neoplasms malignant and unspecified | Neoplasms benign, malignant and unspecified (incl cysts and polyps) |

|                                      |                                                      |                                                                      |                                                                     |
|--------------------------------------|------------------------------------------------------|----------------------------------------------------------------------|---------------------------------------------------------------------|
| Vulval neoplasm                      | Female reproductive neoplasms unspecified malignancy | Reproductive neoplasms female malignant and unspecified              | Neoplasms benign, malignant and unspecified (incl cysts and polyps) |
| Vulval operation                     | External female genital therapeutic procedures       | Obstetric and gynaecological therapeutic procedures                  | Surgical and medical procedures                                     |
| Somatostatin receptor scan abnormal  | Endocrine analyses and imaging NEC                   | Endocrine investigations (incl sex hormones)                         | Investigations                                                      |
| Spleen scan abnormal                 | Bone marrow and immune tissue imaging procedures     | Haematology investigations (incl blood groups)                       | Investigations                                                      |
| Stomach scan abnormal                | Gastrointestinal and abdominal imaging procedures    | Gastrointestinal investigations                                      | Investigations                                                      |
| Testicular scan abnormal             | Reproductive organ and breast imaging procedures     | Reproductive organ and breast investigations (excl hormone analyses) | Investigations                                                      |
| Thyroid gland scan abnormal          | Endocrine analyses and imaging NEC                   | Endocrine investigations (incl sex hormones)                         | Investigations                                                      |
| Scan with contrast abnormal          | Imaging procedures NEC                               | Investigations, imaging and histopathology procedures NEC            | Investigations                                                      |
| Vaginal neoplasm                     | Female reproductive neoplasms unspecified malignancy | Reproductive neoplasms female malignant and unspecified              | Neoplasms benign, malignant and unspecified (incl cysts and polyps) |
| Metastasis                           | Metastases to unknown and unspecified sites          | Metastases                                                           | Neoplasms benign, malignant and unspecified (incl cysts and polyps) |
| Metastases to biliary tract          | Metastases to specified sites                        | Metastases                                                           | Neoplasms benign, malignant and unspecified (incl cysts and polyps) |
| Metastases to gastrointestinal tract | Metastases to specified sites                        | Metastases                                                           | Neoplasms benign, malignant and unspecified (incl cysts and polyps) |
| Metastases to soft tissue            | Metastases to specified sites                        | Metastases                                                           | Neoplasms benign, malignant and unspecified (incl cysts and polyps) |
| Tumour vaccine therapy               | Tumour vaccine therapies                             | Therapeutic procedures and supportive care NEC                       | Surgical and medical procedures                                     |
| Ureteral neoplasm                    | Urinary tract neoplasms unspecified malignancy NEC   | Renal and urinary tract neoplasms malignant and unspecified          | Neoplasms benign, malignant and unspecified (incl cysts and polyps) |

|                                     |                                                           |                                                                        |                                                                     |
|-------------------------------------|-----------------------------------------------------------|------------------------------------------------------------------------|---------------------------------------------------------------------|
| Urethral neoplasm                   | Urinary tract neoplasms unspecified malignancy NEC        | Renal and urinary tract neoplasms malignant and unspecified            | Neoplasms benign, malignant and unspecified (incl cysts and polyps) |
| Smooth muscle cell neoplasm         | Neoplasms unspecified malignancy and site unspecified NEC | Miscellaneous and site unspecified neoplasms malignant and unspecified | Neoplasms benign, malignant and unspecified (incl cysts and polyps) |
| Spinal cord neoplasm                | Nervous system neoplasms unspecified malignancy NEC       | Nervous system neoplasms malignant and unspecified NEC                 | Neoplasms benign, malignant and unspecified (incl cysts and polyps) |
| Blast cell count increased          | Haematological analyses NEC                               | Haematology investigations (incl blood groups)                         | Investigations                                                      |
| Paranasal cyst                      | Paranasal sinus disorders (excl infections and neoplasms) | Upper respiratory tract disorders (excl infections)                    | Respiratory, thoracic and mediastinal disorders                     |
| Congenital cyst                     | Congenital disorders NEC                                  | Congenital and hereditary disorders NEC                                | Congenital, familial and genetic disorders                          |
| Retroperitoneal neoplasm metastatic | Gastrointestinal neoplasms malignancy unspecified NEC     | Gastrointestinal neoplasms malignant and unspecified                   | Neoplasms benign, malignant and unspecified (incl cysts and polyps) |
| Leukaemia recurrent                 | Leukaemias NEC                                            | Leukaemias                                                             | Neoplasms benign, malignant and unspecified (incl cysts and polyps) |
| Cementoblastoma                     | Lip and oral cavity neoplasms benign                      | Gastrointestinal neoplasms benign                                      | Neoplasms benign, malignant and unspecified (incl cysts and polyps) |
| In vivo gene therapy                | Gene therapies                                            | Therapeutic procedures and supportive care NEC                         | Surgical and medical procedures                                     |
| Dysplastic naevus                   | Skin neoplasms benign                                     | Cutaneous neoplasms benign                                             | Neoplasms benign, malignant and unspecified (incl cysts and polyps) |
| Gastrooesophageal cancer            | Gastric neoplasms malignant                               | Gastrointestinal neoplasms malignant and unspecified                   | Neoplasms benign, malignant and unspecified (incl cysts and polyps) |
| Hormone-refractory prostate cancer  | Prostatic neoplasms malignant                             | Reproductive neoplasms male malignant and unspecified                  | Neoplasms benign, malignant and unspecified (incl cysts and polyps) |
| Cronkhite-Canada syndrome           | Gastrointestinal neoplasms NEC                            | Malignant and unspecified neoplasms gastrointestinal NEC               | Gastrointestinal disorders                                          |
| Sebaceous adenoma                   | Skin neoplasms benign                                     | Cutaneous neoplasms benign                                             | Neoplasms benign, malignant and                                     |

|                         |                                                                            |                                                                        |                                                                     |
|-------------------------|----------------------------------------------------------------------------|------------------------------------------------------------------------|---------------------------------------------------------------------|
|                         |                                                                            |                                                                        | unspecified (incl cysts and polyps)                                 |
| Naevus haemorrhage      | Skin neoplasms benign                                                      | Cutaneous neoplasms benign                                             | Neoplasms benign, malignant and unspecified (incl cysts and polyps) |
| Muir-Torre syndrome     | Intestinal disorders congenital                                            | Gastrointestinal tract disorders congenital                            | Congenital, familial and genetic disorders                          |
| X-ray therapy to joint  | Joint therapeutic procedures                                               | Bone and joint therapeutic procedures                                  | Surgical and medical procedures                                     |
| Breast adenoma          | Breast and nipple neoplasms benign                                         | Breast neoplasms benign (incl nipple)                                  | Neoplasms benign, malignant and unspecified (incl cysts and polyps) |
| Breast fibroma          | Breast and nipple neoplasms benign                                         | Breast neoplasms benign (incl nipple)                                  | Neoplasms benign, malignant and unspecified (incl cysts and polyps) |
| Trisomy 12              | Autosomal chromosomal abnormalities                                        | Chromosomal abnormalities and abnormal gene carriers                   | Congenital, familial and genetic disorders                          |
| Erythroplasia           | Neoplasms unspecified malignancy and site unspecified NEC                  | Miscellaneous and site unspecified neoplasms malignant and unspecified | Neoplasms benign, malignant and unspecified (incl cysts and polyps) |
| Metastatic glioma       | Glial tumours malignant                                                    | Nervous system neoplasms malignant and unspecified NEC                 | Neoplasms benign, malignant and unspecified (incl cysts and polyps) |
| Rosai-Dorfman syndrome  | Histiocytoses                                                              | Haematopoietic neoplasms (excl leukaemias and lymphomas)               | Neoplasms benign, malignant and unspecified (incl cysts and polyps) |
| Odontogenic cyst        | Dental disorders congenital                                                | Gastrointestinal tract disorders congenital                            | Congenital, familial and genetic disorders                          |
| Congenital vaginal cyst | Female reproductive tract disorders congenital                             | Reproductive tract and breast disorders congenital                     | Congenital, familial and genetic disorders                          |
| Laryngeal leukoplakia   | Laryngeal and adjacent sites disorders NEC (excl infections and neoplasms) | Upper respiratory tract disorders (excl infections)                    | Respiratory, thoracic and mediastinal disorders                     |
| Colon cancer stage 0    | Colorectal neoplasms malignant                                             | Gastrointestinal neoplasms malignant and unspecified                   | Neoplasms benign, malignant and unspecified (incl cysts and polyps) |
| Vulvar adenocarcinoma   | Vulval neoplasms malignant                                                 | Reproductive neoplasms female malignant and unspecified                | Neoplasms benign, malignant and unspecified (incl cysts and polyps) |



|                                       |                                                          |                                                                        |                                                                     |
|---------------------------------------|----------------------------------------------------------|------------------------------------------------------------------------|---------------------------------------------------------------------|
| Metastatic squamous cell carcinoma    | Neoplasms malignant site unspecified NEC                 | Miscellaneous and site unspecified neoplasms malignant and unspecified | Neoplasms benign, malignant and unspecified (incl cysts and polyps) |
| Stem cell transplant                  | Haematological therapeutic procedures NEC                | Haematological and lymphoid tissue therapeutic procedures              | Surgical and medical procedures                                     |
| Bladder polypectomy                   | Bladder therapeutic procedures                           | Renal and urinary tract therapeutic procedures                         | Surgical and medical procedures                                     |
| Porocarcinoma                         | Skin neoplasms malignant and unspecified (excl melanoma) | Skin neoplasms malignant and unspecified                               | Neoplasms benign, malignant and unspecified (incl cysts and polyps) |
| Radical neck dissection               | Head, neck and oral cavity therapeutic procedures NEC    | Head and neck therapeutic procedures                                   | Surgical and medical procedures                                     |
| Lung neoplasm surgery                 | Bronchial and pulmonary therapeutic procedures           | Respiratory tract therapeutic procedures                               | Surgical and medical procedures                                     |
| Radiotherapy to eye                   | Eye therapeutic procedures NEC                           | Eye therapeutic procedures                                             | Surgical and medical procedures                                     |
| Radiotherapy to ovary                 | Ovarian therapeutic procedures                           | Obstetric and gynaecological therapeutic procedures                    | Surgical and medical procedures                                     |
| Radiotherapy to vagina                | Vaginal therapeutic procedures                           | Obstetric and gynaecological therapeutic procedures                    | Surgical and medical procedures                                     |
| Radiotherapy to lymph nodes           | Lymphoid tissue therapeutic procedures                   | Haematological and lymphoid tissue therapeutic procedures              | Surgical and medical procedures                                     |
| Acute lymphocytic leukaemia recurrent | Leukaemias acute lymphocytic                             | Leukaemias                                                             | Neoplasms benign, malignant and unspecified (incl cysts and polyps) |
| Malignant neoplasm of eyelid          | Ocular neoplasms malignant (excl melanomas)              | Ocular neoplasms                                                       | Neoplasms benign, malignant and unspecified (incl cysts and polyps) |
| Malignant melanoma of eyelid          | Ocular melanomas                                         | Ocular neoplasms                                                       | Neoplasms benign, malignant and unspecified (incl cysts and polyps) |
| Benign neoplasm of eyelid             | Ocular neoplasms benign                                  | Ocular neoplasms                                                       | Neoplasms benign, malignant and unspecified (incl cysts and polyps) |
| Implant site cyst                     | Implant and catheter site reactions                      | Administration site reactions                                          | General disorders and administration site conditions                |

|                                                         |                                                                                 |                                                                 |                                                                     |
|---------------------------------------------------------|---------------------------------------------------------------------------------|-----------------------------------------------------------------|---------------------------------------------------------------------|
| Non-Hodgkin's lymphoma unspecified histology aggressive | Non-Hodgkin's lymphomas unspecified histology aggressive                        | Lymphomas non-Hodgkin's unspecified histology                   | Neoplasms benign, malignant and unspecified (incl cysts and polyps) |
| Metastatic gastric cancer                               | Gastric neoplasms malignant                                                     | Gastrointestinal neoplasms malignant and unspecified            | Neoplasms benign, malignant and unspecified (incl cysts and polyps) |
| Ileocelectomy                                           | Gastrointestinal therapeutic procedures NEC                                     | Gastrointestinal therapeutic procedures                         | Surgical and medical procedures                                     |
| Vulvovaginal adenosis                                   | Vulvovaginal disorders NEC                                                      | Vulvovaginal disorders (excl infections and inflammations)      | Reproductive system and breast disorders                            |
| Percutaneous ethanol injection therapy                  | Therapeutic procedures NEC                                                      | Therapeutic procedures and supportive care NEC                  | Surgical and medical procedures                                     |
| Lung adenocarcinoma metastatic                          | Non-small cell neoplasms malignant of the respiratory tract cell type specified | Respiratory and mediastinal neoplasms malignant and unspecified | Neoplasms benign, malignant and unspecified (incl cysts and polyps) |
| Lip squamous cell carcinoma                             | Lip and oral cavity neoplasms malignant                                         | Gastrointestinal neoplasms malignant and unspecified            | Neoplasms benign, malignant and unspecified (incl cysts and polyps) |
| Immune enhancement therapy                              | Therapeutic procedures NEC                                                      | Therapeutic procedures and supportive care NEC                  | Surgical and medical procedures                                     |
| Hormone suppression therapy                             | Hormonal therapeutic procedures NEC                                             | Endocrine gland therapeutic procedures                          | Surgical and medical procedures                                     |
| Cell marker increased                                   | Cell marker analyses                                                            | Cytogenetic investigations                                      | Investigations                                                      |
| Oropharyngeal cancer stage IV                           | Oropharyngeal, nasopharyngeal and tonsillar neoplasms malignant and unspecified | Respiratory and mediastinal neoplasms malignant and unspecified | Neoplasms benign, malignant and unspecified (incl cysts and polyps) |
| Endometrial metaplasia                                  | Uterine disorders NEC                                                           | Uterine, pelvic and broad ligament disorders                    | Reproductive system and breast disorders                            |
| Ovarian fibroma                                         | Ovarian neoplasms benign                                                        | Reproductive neoplasms female benign                            | Neoplasms benign, malignant and unspecified (incl cysts and polyps) |
| Bladder neoplasm surgery                                | Bladder therapeutic procedures                                                  | Renal and urinary tract therapeutic procedures                  | Surgical and medical procedures                                     |
| Calcifying fibrous pseudotumour                         | Neoplasms benign site unspecified NEC                                           | Miscellaneous and site unspecified neoplasms benign             | Neoplasms benign, malignant and unspecified (incl cysts and polyps) |
| Lymphoma transformation                                 | Lymphomas unspecified NEC                                                       | Lymphomas NEC                                                   | Neoplasms benign, malignant and unspecified (incl cysts and polyps) |

|                                            |                                                          |                                                                        |                                                                     |
|--------------------------------------------|----------------------------------------------------------|------------------------------------------------------------------------|---------------------------------------------------------------------|
|                                            |                                                          |                                                                        | unspecified (incl cysts and polyps)                                 |
| Tumour invasion                            | Neoplasms malignant site unspecified NEC                 | Miscellaneous and site unspecified neoplasms malignant and unspecified | Neoplasms benign, malignant and unspecified (incl cysts and polyps) |
| Breakthrough pain                          | Pain and discomfort NEC                                  | General system disorders NEC                                           | General disorders and administration site conditions                |
| Desmoplastic small round cell tumour       | Gastrointestinal neoplasms malignant NEC                 | Gastrointestinal neoplasms malignant and unspecified                   | Neoplasms benign, malignant and unspecified (incl cysts and polyps) |
| Sezary cells increased                     | White blood cell analyses                                | Haematology investigations (incl blood groups)                         | Investigations                                                      |
| Atypical fibroxanthoma                     | Skin neoplasms malignant and unspecified (excl melanoma) | Skin neoplasms malignant and unspecified                               | Neoplasms benign, malignant and unspecified (incl cysts and polyps) |
| Micrographic skin surgery                  | Skin and subcutaneous tissue therapeutic procedures NEC  | Skin and subcutaneous tissue therapeutic procedures                    | Surgical and medical procedures                                     |
| Malignant transformation                   | Neoplasms malignant site unspecified NEC                 | Miscellaneous and site unspecified neoplasms malignant and unspecified | Neoplasms benign, malignant and unspecified (incl cysts and polyps) |
| Tumour perforation                         | Oncologic complications and emergencies                  | Neoplasm related morbidities                                           | Neoplasms benign, malignant and unspecified (incl cysts and polyps) |
| High frequency ablation                    | Therapeutic procedures NEC                               | Therapeutic procedures and supportive care NEC                         | Surgical and medical procedures                                     |
| Plasmablastic lymphoma                     | Non-Hodgkin's lymphomas NEC                              | Lymphomas non-Hodgkin's unspecified histology                          | Neoplasms benign, malignant and unspecified (incl cysts and polyps) |
| Epidermal growth factor receptor increased | Cell marker analyses                                     | Cytogenetic investigations                                             | Investigations                                                      |
| Clonal evolution                           | Oncologic complications and emergencies                  | Neoplasm related morbidities                                           | Neoplasms benign, malignant and unspecified (incl cysts and polyps) |
| Acrokeratosis paraneoplastica              | Papulosquamous conditions                                | Epidermal and dermal conditions                                        | Skin and subcutaneous tissue disorders                              |
| Pancoast's syndrome                        | Peripheral neuropathies NEC                              | Peripheral neuropathies                                                | Nervous system disorders                                            |
| Cancer in remission                        | Neoplasms malignant site unspecified NEC                 | Miscellaneous and site unspecified neoplasms                           | Neoplasms benign, malignant and                                     |

|                                                       |                                                        |                                                                  |                                                                     |
|-------------------------------------------------------|--------------------------------------------------------|------------------------------------------------------------------|---------------------------------------------------------------------|
|                                                       |                                                        | malignant and unspecified                                        | unspecified (incl cysts and polyps)                                 |
| Paraneoplastic retinopathy                            | Retinopathies NEC                                      | Retina, choroid and vitreous haemorrhages and vascular disorders | Eye disorders                                                       |
| Vaginal adenocarcinoma                                | Vaginal neoplasms malignant                            | Reproductive neoplasms female malignant and unspecified          | Neoplasms benign, malignant and unspecified (incl cysts and polyps) |
| Leser-Trelat sign                                     | Skin neoplasms benign                                  | Cutaneous neoplasms benign                                       | Neoplasms benign, malignant and unspecified (incl cysts and polyps) |
| HER-2 positive breast cancer                          | Breast and nipple neoplasms malignant                  | Breast neoplasms malignant and unspecified (incl nipple)         | Neoplasms benign, malignant and unspecified (incl cysts and polyps) |
| Alcoholisation procedure                              | Therapeutic procedures NEC                             | Therapeutic procedures and supportive care NEC                   | Surgical and medical procedures                                     |
| Radiotherapy to kidney                                | Renal therapeutic procedures                           | Renal and urinary tract therapeutic procedures                   | Surgical and medical procedures                                     |
| Malignant glioma                                      | Glial tumours malignant                                | Nervous system neoplasms malignant and unspecified NEC           | Neoplasms benign, malignant and unspecified (incl cysts and polyps) |
| Radiosensitisation therapy                            | Cellular antitumour therapies                          | Therapeutic procedures and supportive care NEC                   | Surgical and medical procedures                                     |
| Infusion site cyst                                    | Infusion site reactions                                | Administration site reactions                                    | General disorders and administration site conditions                |
| Hormone therapy                                       | Hormonal therapeutic procedures NEC                    | Endocrine gland therapeutic procedures                           | Surgical and medical procedures                                     |
| Scrotal cyst                                          | Scrotal disorders NEC                                  | Penile and scrotal disorders (excl infections and inflammations) | Reproductive system and breast disorders                            |
| CNS germinoma                                         | Central nervous system neoplasms malignant NEC         | Nervous system neoplasms malignant and unspecified NEC           | Neoplasms benign, malignant and unspecified (incl cysts and polyps) |
| Chronic eosinophilic leukaemia                        | Leukaemias chronic myeloid                             | Leukaemias                                                       | Neoplasms benign, malignant and unspecified (incl cysts and polyps) |
| Non-Hodgkin's lymphoma unspecified histology indolent | Non-Hodgkin's lymphomas unspecified histology indolent | Lymphomas non-Hodgkin's unspecified histology                    | Neoplasms benign, malignant and unspecified (incl cysts and polyps) |

|                                              |                                                |                                                            |                                                                     |
|----------------------------------------------|------------------------------------------------|------------------------------------------------------------|---------------------------------------------------------------------|
| Primary effusion lymphoma                    | B-cell lymphomas NEC                           | Lymphomas non-Hodgkin's B-cell                             | Neoplasms benign, malignant and unspecified (incl cysts and polyps) |
| Ovarian stromal cancer                       | Ovarian neoplasms malignant (excl germ cell)   | Reproductive neoplasms female malignant and unspecified    | Neoplasms benign, malignant and unspecified (incl cysts and polyps) |
| Congenital fibrosarcoma                      | Musculoskeletal disorders congenital NEC       | Musculoskeletal and connective tissue disorders congenital | Congenital, familial and genetic disorders                          |
| Alveolar rhabdomyosarcoma                    | Rhabdomyosarcomas                              | Soft tissue neoplasms malignant and unspecified            | Neoplasms benign, malignant and unspecified (incl cysts and polyps) |
| Embryonal rhabdomyosarcoma                   | Rhabdomyosarcomas                              | Soft tissue neoplasms malignant and unspecified            | Neoplasms benign, malignant and unspecified (incl cysts and polyps) |
| Astrocytoma, low grade                       | Gliomas benign                                 | Nervous system neoplasms benign                            | Neoplasms benign, malignant and unspecified (incl cysts and polyps) |
| Nongerminomatous germ cell tumour of the CNS | Central nervous system neoplasms malignant NEC | Nervous system neoplasms malignant and unspecified NEC     | Neoplasms benign, malignant and unspecified (incl cysts and polyps) |
| Atypical teratoid/rhabdoid tumour of CNS     | Central nervous system neoplasms malignant NEC | Nervous system neoplasms malignant and unspecified NEC     | Neoplasms benign, malignant and unspecified (incl cysts and polyps) |
| Ureteral cyst                                | Ureteric disorders NEC                         | Ureteric disorders                                         | Renal and urinary disorders                                         |
| Nodular fasciitis                            | Soft tissue neoplasms benign NEC               | Soft tissue neoplasms benign                               | Neoplasms benign, malignant and unspecified (incl cysts and polyps) |
| Mueller's mixed tumour                       | Female reproductive neoplasms malignant NEC    | Reproductive neoplasms female malignant and unspecified    | Neoplasms benign, malignant and unspecified (incl cysts and polyps) |
| Perineal cyst                                | Reproductive tract neoplasms NEC               | Reproductive tract disorders NEC                           | Reproductive system and breast disorders                            |
| Huertle cell carcinoma                       | Thyroid neoplasms malignant                    | Endocrine neoplasms malignant and unspecified              | Neoplasms benign, malignant and unspecified (incl cysts and polyps) |
| Apocrine breast carcinoma                    | Breast and nipple neoplasms malignant          | Breast neoplasms malignant and unspecified (incl nipple)   | Neoplasms benign, malignant and unspecified (incl cysts and polyps) |
| Gliomatosis cerebri                          | Glial tumours malignant                        | Nervous system neoplasms malignant and                     | Neoplasms benign, malignant and                                     |

|                                               |                                                      |                                                                  |                                                                     |
|-----------------------------------------------|------------------------------------------------------|------------------------------------------------------------------|---------------------------------------------------------------------|
|                                               |                                                      | unspecified NEC                                                  | unspecified (incl cysts and polyps)                                 |
| Paraneoplastic dermatomyositis                | Paraneoplastic syndromes NEC                         | Neoplasm related morbidities                                     | Neoplasms benign, malignant and unspecified (incl cysts and polyps) |
| Conjunctival melanoma                         | Ocular melanomas                                     | Ocular neoplasms                                                 | Neoplasms benign, malignant and unspecified (incl cysts and polyps) |
| Penile dysplasia                              | Penile disorders NEC (excl erection and ejaculation) | Penile and scrotal disorders (excl infections and inflammations) | Reproductive system and breast disorders                            |
| Squamous cell carcinoma of pharynx            | Pharyngeal neoplasms malignant and unspecified       | Respiratory and mediastinal neoplasms malignant and unspecified  | Neoplasms benign, malignant and unspecified (incl cysts and polyps) |
| Thyroid cancer                                | Thyroid neoplasms malignant                          | Endocrine neoplasms malignant and unspecified                    | Neoplasms benign, malignant and unspecified (incl cysts and polyps) |
| Haematological malignancy                     | Haematologic neoplasms NEC                           | Haematopoietic neoplasms (excl leukaemias and lymphomas)         | Neoplasms benign, malignant and unspecified (incl cysts and polyps) |
| Medulloblastoma recurrent                     | Glial tumours malignant                              | Nervous system neoplasms malignant and unspecified NEC           | Neoplasms benign, malignant and unspecified (incl cysts and polyps) |
| Neuroblastoma recurrent                       | Nervous system neoplasms malignant NEC               | Nervous system neoplasms malignant and unspecified NEC           | Neoplasms benign, malignant and unspecified (incl cysts and polyps) |
| Melanoma recurrent                            | Skin melanomas (excl ocular)                         | Skin neoplasms malignant and unspecified                         | Neoplasms benign, malignant and unspecified (incl cysts and polyps) |
| Ovarian cancer recurrent                      | Ovarian neoplasms malignant (excl germ cell)         | Reproductive neoplasms female malignant and unspecified          | Neoplasms benign, malignant and unspecified (incl cysts and polyps) |
| Bladder transitional cell carcinoma stage 0   | Bladder neoplasms malignant                          | Renal and urinary tract neoplasms malignant and unspecified      | Neoplasms benign, malignant and unspecified (incl cysts and polyps) |
| Bladder transitional cell carcinoma recurrent | Bladder neoplasms malignant                          | Renal and urinary tract neoplasms malignant and unspecified      | Neoplasms benign, malignant and unspecified (incl cysts and polyps) |
| Bladder transitional cell carcinoma stage I   | Bladder neoplasms malignant                          | Renal and urinary tract neoplasms malignant and unspecified      | Neoplasms benign, malignant and unspecified (incl cysts and polyps) |

|                                               |                                         |                                                             |                                                                     |
|-----------------------------------------------|-----------------------------------------|-------------------------------------------------------------|---------------------------------------------------------------------|
| Bladder transitional cell carcinoma stage IV  | Bladder neoplasms malignant             | Renal and urinary tract neoplasms malignant and unspecified | Neoplasms benign, malignant and unspecified (incl cysts and polyps) |
| Bladder transitional cell carcinoma stage II  | Bladder neoplasms malignant             | Renal and urinary tract neoplasms malignant and unspecified | Neoplasms benign, malignant and unspecified (incl cysts and polyps) |
| Bladder transitional cell carcinoma stage III | Bladder neoplasms malignant             | Renal and urinary tract neoplasms malignant and unspecified | Neoplasms benign, malignant and unspecified (incl cysts and polyps) |
| Ameloblastoma                                 | Lip and oral cavity neoplasms benign    | Gastrointestinal neoplasms benign                           | Neoplasms benign, malignant and unspecified (incl cysts and polyps) |
| Gallbladder cancer metastatic                 | Gallbladder neoplasms malignant         | Hepatobiliary neoplasms malignant and unspecified           | Neoplasms benign, malignant and unspecified (incl cysts and polyps) |
| Metastatic salivary gland cancer              | Salivary gland neoplasms malignant      | Gastrointestinal neoplasms malignant and unspecified        | Neoplasms benign, malignant and unspecified (incl cysts and polyps) |
| HER-2 positive gastric cancer                 | Gastric neoplasms malignant             | Gastrointestinal neoplasms malignant and unspecified        | Neoplasms benign, malignant and unspecified (incl cysts and polyps) |
| Conjunctival primary acquired melanosis       | Ocular neoplasms malignancy unspecified | Ocular neoplasms                                            | Neoplasms benign, malignant and unspecified (incl cysts and polyps) |
| Numb chin syndrome                            | Trigeminal disorders                    | Cranial nerve disorders (excl neoplasms)                    | Nervous system disorders                                            |
| Myxofibrosarcoma                              | Fibrous histiocytomas malignant         | Soft tissue neoplasms malignant and unspecified             | Neoplasms benign, malignant and unspecified (incl cysts and polyps) |
| Hepatosplenic T-cell lymphoma                 | Adult T-cell lymphomas/leukaemias       | Lymphomas non-Hodgkin's T-cell                              | Neoplasms benign, malignant and unspecified (incl cysts and polyps) |
| Endometrial sarcoma recurrent                 | Endometrial neoplasms malignant         | Reproductive neoplasms female malignant and unspecified     | Neoplasms benign, malignant and unspecified (incl cysts and polyps) |
| Endometrial sarcoma metastatic                | Endometrial neoplasms malignant         | Reproductive neoplasms female malignant and unspecified     | Neoplasms benign, malignant and unspecified (incl cysts and polyps) |
| Intraperitoneal hyperthermic chemotherapy     | Chemotherapies                          | Therapeutic procedures and supportive care<br>NEC           | Surgical and medical procedures                                     |

|                                         |                                                                        |                                                                   |                                                                     |
|-----------------------------------------|------------------------------------------------------------------------|-------------------------------------------------------------------|---------------------------------------------------------------------|
| Leukaemic infiltration extramedullary   | Leukaemias NEC                                                         | Leukaemias                                                        | Neoplasms benign, malignant and unspecified (incl cysts and polyps) |
| Papilloma conjunctival                  | Ocular neoplasms benign                                                | Ocular neoplasms                                                  | Neoplasms benign, malignant and unspecified (incl cysts and polyps) |
| Burkitt's leukaemia                     | Leukaemias acute lymphocytic                                           | Leukaemias                                                        | Neoplasms benign, malignant and unspecified (incl cysts and polyps) |
| Tracheal papilloma                      | Pharyngeal and laryngeal neoplasms benign                              | Respiratory and mediastinal neoplasms benign (excl mesotheliomas) | Neoplasms benign, malignant and unspecified (incl cysts and polyps) |
| Congenital naevus                       | Skin and subcutaneous tissue disorders congenital NEC                  | Skin and subcutaneous tissue disorders congenital                 | Congenital, familial and genetic disorders                          |
| Chiasma syndrome                        | Neurologic visual problems NEC                                         | Neurological disorders of the eye                                 | Nervous system disorders                                            |
| Palmar fasciitis                        | Musculoskeletal and connective tissue infections and inflammations NEC | Musculoskeletal and connective tissue disorders NEC               | Musculoskeletal and connective tissue disorders                     |
| Malignant mesenteric neoplasm           | Gastrointestinal neoplasms malignant NEC                               | Gastrointestinal neoplasms malignant and unspecified              | Neoplasms benign, malignant and unspecified (incl cysts and polyps) |
| Spinal meningeal cyst                   | Nervous system cysts and polyps                                        | Nervous system neoplasms benign                                   | Nervous system disorders                                            |
| Myelodysplastic syndrome transformation | Myelodysplastic syndromes                                              | Leukaemias                                                        | Neoplasms benign, malignant and unspecified (incl cysts and polyps) |
| Hepatic angiosarcoma                    | Hepatic neoplasms malignant                                            | Hepatobiliary neoplasms malignant and unspecified                 | Neoplasms benign, malignant and unspecified (incl cysts and polyps) |
| Acute biphenotypic leukaemia            | Leukaemias acute NEC                                                   | Leukaemias                                                        | Neoplasms benign, malignant and unspecified (incl cysts and polyps) |
| Leukaemic infiltration gingiva          | Leukaemias NEC                                                         | Leukaemias                                                        | Neoplasms benign, malignant and unspecified (incl cysts and polyps) |
| Choroid plexus carcinoma                | Central nervous system neoplasms malignant NEC                         | Nervous system neoplasms malignant and unspecified NEC            | Neoplasms benign, malignant and unspecified (incl cysts and polyps) |
| Pancreatic neuroendocrine tumour        | Islet cell neoplasms and APUDoma NEC                                   | Endocrine neoplasms malignant and                                 | Neoplasms benign, malignant and                                     |



|                                                                |                                                                     |                                                                        |                                                                     |
|----------------------------------------------------------------|---------------------------------------------------------------------|------------------------------------------------------------------------|---------------------------------------------------------------------|
|                                                                |                                                                     | unspecified                                                            | unspecified (incl cysts and polyps)                                 |
| Malignant dysphagia                                            | Gastrointestinal signs and symptoms NEC                             | Gastrointestinal signs and symptoms                                    | Gastrointestinal disorders                                          |
| Prostatic cyst                                                 | Prostatic signs, symptoms and disorders NEC                         | Prostatic disorders (excl infections and inflammations)                | Reproductive system and breast disorders                            |
| Birt-Hogg-Dube syndrome                                        | Skin and subcutaneous tissue disorders congenital NEC               | Skin and subcutaneous tissue disorders congenital                      | Congenital, familial and genetic disorders                          |
| Parathyroid cyst                                               | Parathyroid disorders NEC                                           | Parathyroid gland disorders                                            | Endocrine disorders                                                 |
| Oncologic complication                                         | Oncologic complications and emergencies                             | Neoplasm related morbidities                                           | Neoplasms benign, malignant and unspecified (incl cysts and polyps) |
| Haemorrhagic hepatic cyst                                      | Hepatic and hepatobiliary disorders NEC                             | Hepatic and hepatobiliary disorders                                    | Hepatobiliary disorders                                             |
| Gingival cancer                                                | Lip and oral cavity neoplasms malignant                             | Gastrointestinal neoplasms malignant and unspecified                   | Neoplasms benign, malignant and unspecified (incl cysts and polyps) |
| Head and neck cancer                                           | Neoplasms malignant site unspecified NEC                            | Miscellaneous and site unspecified neoplasms malignant and unspecified | Neoplasms benign, malignant and unspecified (incl cysts and polyps) |
| Lipofibroma                                                    | Soft tissue neoplasms benign NEC                                    | Soft tissue neoplasms benign                                           | Neoplasms benign, malignant and unspecified (incl cysts and polyps) |
| Inflammatory myofibroblastic tumour                            | Soft tissue neoplasms malignant and unspecified NEC (excl sarcomas) | Soft tissue neoplasms malignant and unspecified                        | Neoplasms benign, malignant and unspecified (incl cysts and polyps) |
| Hereditary papillary renal carcinoma                           | Renal and urinary tract disorders congenital NEC                    | Renal and urinary tract disorders congenital                           | Congenital, familial and genetic disorders                          |
| Hereditary leiomyomatosis renal cell carcinoma                 | Renal and urinary tract disorders congenital NEC                    | Renal and urinary tract disorders congenital                           | Congenital, familial and genetic disorders                          |
| Renal cell carcinoma                                           | Renal neoplasms malignant                                           | Renal and urinary tract neoplasms malignant and unspecified            | Neoplasms benign, malignant and unspecified (incl cysts and polyps) |
| Refractory cytopenia with multilineage dysplasia               | Myelodysplastic syndromes                                           | Leukaemias                                                             | Neoplasms benign, malignant and unspecified (incl cysts and polyps) |
| Eastern Cooperative Oncology Group performance status worsened | Physical examination procedures and organ system status             | Physical examination and organ system status topics                    | Investigations                                                      |

|                                          |                                                          |                                                            |                                                                     |
|------------------------------------------|----------------------------------------------------------|------------------------------------------------------------|---------------------------------------------------------------------|
| Melanoplakia oral                        | Oral soft tissue disorders NEC                           | Oral soft tissue conditions                                | Gastrointestinal disorders                                          |
| PHACES syndrome                          | Musculoskeletal disorders congenital NEC                 | Musculoskeletal and connective tissue disorders congenital | Congenital, familial and genetic disorders                          |
| Tumour thrombosis                        | Oncologic complications and emergencies                  | Neoplasm related morbidities                               | Neoplasms benign, malignant and unspecified (incl cysts and polyps) |
| Adenocarcinoma of salivary gland         | Salivary gland neoplasms malignant                       | Gastrointestinal neoplasms malignant and unspecified       | Neoplasms benign, malignant and unspecified (incl cysts and polyps) |
| Metastatic carcinoid tumour              | Carcinoid tumours                                        | Endocrine neoplasms malignant and unspecified              | Neoplasms benign, malignant and unspecified (incl cysts and polyps) |
| Metastatic uterine cancer                | Uterine neoplasms malignant NEC                          | Reproductive neoplasms female malignant and unspecified    | Neoplasms benign, malignant and unspecified (incl cysts and polyps) |
| Metastatic ocular melanoma               | Ocular melanomas                                         | Ocular neoplasms                                           | Neoplasms benign, malignant and unspecified (incl cysts and polyps) |
| Haemangioma of spleen                    | Haematologic neoplasms NEC                               | Haematopoietic neoplasms (excl leukaemias and lymphomas)   | Neoplasms benign, malignant and unspecified (incl cysts and polyps) |
| Malignant neoplasm of seminal vesicle    | Reproductive neoplasms male malignant NEC                | Reproductive neoplasms male malignant and unspecified      | Neoplasms benign, malignant and unspecified (incl cysts and polyps) |
| Benign neoplasm of seminal vesicle       | Reproductive neoplasms male benign NEC                   | Reproductive neoplasms male benign                         | Neoplasms benign, malignant and unspecified (incl cysts and polyps) |
| Extramammary Paget's disease             | Skin neoplasms malignant and unspecified (excl melanoma) | Skin neoplasms malignant and unspecified                   | Neoplasms benign, malignant and unspecified (incl cysts and polyps) |
| Chronic myeloid leukaemia transformation | Leukaemias chronic myeloid                               | Leukaemias                                                 | Neoplasms benign, malignant and unspecified (incl cysts and polyps) |
| Tumour compression                       | Oncologic complications and emergencies                  | Neoplasm related morbidities                               | Neoplasms benign, malignant and unspecified (incl cysts and polyps) |
| Oral papilloma                           | Lip and oral cavity neoplasms benign                     | Gastrointestinal neoplasms benign                          | Neoplasms benign, malignant and unspecified (incl cysts and polyps) |

|                                               |                                                     |                                                          |                                                                     |
|-----------------------------------------------|-----------------------------------------------------|----------------------------------------------------------|---------------------------------------------------------------------|
| Inflammatory pseudotumour                     | Soft tissue neoplasms benign NEC                    | Soft tissue neoplasms benign                             | Neoplasms benign, malignant and unspecified (incl cysts and polyps) |
| X-linked lymphoproliferative syndrome         | Immune system abnormalities congenital              | Immune system disorders congenital                       | Congenital, familial and genetic disorders                          |
| Biliary polyp                                 | Hepatic and hepatobiliary disorders NEC             | Hepatic and hepatobiliary disorders                      | Hepatobiliary disorders                                             |
| Precancerous mucosal lesion                   | Mucosal findings abnormal                           | General system disorders NEC                             | General disorders and administration site conditions                |
| Brain teratoma                                | Central nervous system neoplasms malignant NEC      | Nervous system neoplasms malignant and unspecified NEC   | Neoplasms benign, malignant and unspecified (incl cysts and polyps) |
| Cytokeratin 18 increased                      | Cell marker analyses                                | Cytogenetic investigations                               | Investigations                                                      |
| Chemotherapy sensitivity and resistance assay | Therapeutic drug monitoring analyses                | Toxicology and therapeutic drug monitoring               | Investigations                                                      |
| 5q minus syndrome                             | Myelodysplastic syndromes                           | Leukaemias                                               | Neoplasms benign, malignant and unspecified (incl cysts and polyps) |
| Breast sarcoma                                | Breast and nipple neoplasms malignant               | Breast neoplasms malignant and unspecified (incl nipple) | Neoplasms benign, malignant and unspecified (incl cysts and polyps) |
| Breast sarcoma metastatic                     | Breast and nipple neoplasms malignant               | Breast neoplasms malignant and unspecified (incl nipple) | Neoplasms benign, malignant and unspecified (incl cysts and polyps) |
| Breast sarcoma recurrent                      | Breast and nipple neoplasms malignant               | Breast neoplasms malignant and unspecified (incl nipple) | Neoplasms benign, malignant and unspecified (incl cysts and polyps) |
| Sarcoma metastatic                            | Soft tissue sarcomas histology unspecified          | Soft tissue neoplasms malignant and unspecified          | Neoplasms benign, malignant and unspecified (incl cysts and polyps) |
| Glioneuronal tumour                           | Nervous system neoplasms unspecified malignancy NEC | Nervous system neoplasms malignant and unspecified NEC   | Neoplasms benign, malignant and unspecified (incl cysts and polyps) |
| Pineal gland cyst                             | Nervous system cysts and polyps                     | Nervous system neoplasms benign                          | Nervous system disorders                                            |
| Testicular germ cell cancer metastatic        | Testicular neoplasms malignant                      | Reproductive neoplasms male malignant and unspecified    | Neoplasms benign, malignant and unspecified (incl cysts and polyps) |
| Cardiac valve fibroelastoma                   | Cardiovascular neoplasms benign                     | Miscellaneous and site unspecified neoplasms             | Neoplasms benign, malignant and unspecified (incl cysts and polyps) |

|                                             |                                                                     |                                                                        |                                                                     |
|---------------------------------------------|---------------------------------------------------------------------|------------------------------------------------------------------------|---------------------------------------------------------------------|
|                                             |                                                                     | benign                                                                 | unspecified (incl cysts and polyps)                                 |
| Lung cyst                                   | Parenchymal lung disorders NEC                                      | Lower respiratory tract disorders (excl obstruction and infection)     | Respiratory, thoracic and mediastinal disorders                     |
| Soft tissue neoplasm                        | Soft tissue neoplasms malignant and unspecified NEC (excl sarcomas) | Soft tissue neoplasms malignant and unspecified                        | Neoplasms benign, malignant and unspecified (incl cysts and polyps) |
| Phaeochromocytoma crisis                    | Islet cell neoplasms and APUDoma NEC                                | Endocrine neoplasms malignant and unspecified                          | Neoplasms benign, malignant and unspecified (incl cysts and polyps) |
| Sebaceous carcinoma                         | Skin neoplasms malignant and unspecified (excl melanoma)            | Skin neoplasms malignant and unspecified                               | Neoplasms benign, malignant and unspecified (incl cysts and polyps) |
| Histiocytic medullary reticulosis           | Histiocytoses                                                       | Haematopoietic neoplasms (excl leukaemias and lymphomas)               | Neoplasms benign, malignant and unspecified (incl cysts and polyps) |
| Fungating wound                             | Skin and subcutaneous tissue ulcerations                            | Skin and subcutaneous tissue disorders NEC                             | Skin and subcutaneous tissue disorders                              |
| Warty dyskeratoma                           | Skin neoplasms benign                                               | Cutaneous neoplasms benign                                             | Neoplasms benign, malignant and unspecified (incl cysts and polyps) |
| Adenosquamous cell carcinoma                | Neoplasms malignant site unspecified NEC                            | Miscellaneous and site unspecified neoplasms malignant and unspecified | Neoplasms benign, malignant and unspecified (incl cysts and polyps) |
| Pancreatic neuroendocrine tumour metastatic | Islet cell neoplasms and APUDoma NEC                                | Endocrine neoplasms malignant and unspecified                          | Neoplasms benign, malignant and unspecified (incl cysts and polyps) |
| Primitive neuroectodermal tumour metastatic | Nervous system neoplasms malignant NEC                              | Nervous system neoplasms malignant and unspecified NEC                 | Neoplasms benign, malignant and unspecified (incl cysts and polyps) |
| Implantable pleural catheter insertion      | Pleural therapeutic procedures                                      | Respiratory tract therapeutic procedures                               | Surgical and medical procedures                                     |
| Germ cell cancer metastatic                 | Germ cell neoplasms site unspecified NEC                            | Miscellaneous and site unspecified neoplasms malignant and unspecified | Neoplasms benign, malignant and unspecified (incl cysts and polyps) |
| Radiotherapy to joint                       | Joint therapeutic procedures                                        | Bone and joint therapeutic procedures                                  | Surgical and medical procedures                                     |
| Peritoneal carcinoma metastatic             | Gastrointestinal neoplasms malignant NEC                            | Gastrointestinal neoplasms malignant and unspecified                   | Neoplasms benign, malignant and unspecified (incl cysts and polyps) |

|                                              |                                                                   |                                                            |                                                                     |
|----------------------------------------------|-------------------------------------------------------------------|------------------------------------------------------------|---------------------------------------------------------------------|
| Peritoneal fluid protein increased           | Peritoneal fluid and membrane function analyses                   | Gastrointestinal investigations                            | Investigations                                                      |
| Carcinoid heart disease                      | Cardiac valve disorders NEC                                       | Cardiac valve disorders                                    | Cardiac disorders                                                   |
| Benign ear neoplasm                          | Aural neoplasms benign                                            | Miscellaneous and site unspecified neoplasms benign        | Neoplasms benign, malignant and unspecified (incl cysts and polyps) |
| Peritonectomy                                | Abdominal therapeutic procedures NEC                              | Gastrointestinal therapeutic procedures                    | Surgical and medical procedures                                     |
| Enchondroma                                  | Cartilage neoplasms benign                                        | Skeletal neoplasms benign                                  | Neoplasms benign, malignant and unspecified (incl cysts and polyps) |
| Histiocytic necrotising lymphadenitis        | Lymphoproliferative disorders NEC (excl leukaemias and lymphomas) | Haematopoietic neoplasms (excl leukaemias and lymphomas)   | Neoplasms benign, malignant and unspecified (incl cysts and polyps) |
| Omenn syndrome                               | Immune system abnormalities congenital                            | Immune system disorders congenital                         | Congenital, familial and genetic disorders                          |
| Epididymal neoplasm                          | Reproductive neoplasms male unspecified malignancy                | Reproductive neoplasms male malignant and unspecified      | Neoplasms benign, malignant and unspecified (incl cysts and polyps) |
| Stauffer's syndrome                          | Paraneoplastic syndromes NEC                                      | Neoplasm related morbidities                               | Neoplasms benign, malignant and unspecified (incl cysts and polyps) |
| Multiple hereditary exostosis                | Non-site specific bone disorders congenital                       | Musculoskeletal and connective tissue disorders congenital | Congenital, familial and genetic disorders                          |
| Solid pseudopapillary tumour of the pancreas | Pancreatic neoplasms malignant (excl islet cell and carcinoid)    | Gastrointestinal neoplasms malignant and unspecified       | Neoplasms benign, malignant and unspecified (incl cysts and polyps) |
| Small intestinal polypectomy                 | Small intestine therapeutic procedures                            | Gastrointestinal therapeutic procedures                    | Surgical and medical procedures                                     |
| Leukaemic infiltration renal                 | Leukaemias NEC                                                    | Leukaemias                                                 | Neoplasms benign, malignant and unspecified (incl cysts and polyps) |
| Leukaemic infiltration                       | Leukaemias NEC                                                    | Leukaemias                                                 | Neoplasms benign, malignant and unspecified (incl cysts and polyps) |
| Solitary epithelioid histiocytoma            | Histiocytoses                                                     | Haematopoietic neoplasms (excl leukaemias and lymphomas)   | Neoplasms benign, malignant and unspecified (incl cysts and polyps) |
| Radiation therapy to ear, nose, or throat    | Ear, nose and throat radiotherapies                               | Head and neck therapeutic procedures                       | Surgical and medical procedures                                     |

|                                                                |                                                                                 |                                                                 |                                                                     |
|----------------------------------------------------------------|---------------------------------------------------------------------------------|-----------------------------------------------------------------|---------------------------------------------------------------------|
| Bladder dysplasia                                              | Bladder disorders NEC                                                           | Bladder and bladder neck disorders (excl calculi)               | Renal and urinary disorders                                         |
| Carcinomatous polyarthritis                                    | Arthropathies NEC                                                               | Joint disorders                                                 | Musculoskeletal and connective tissue disorders                     |
| Regional chemotherapy                                          | Chemotherapies                                                                  | Therapeutic procedures and supportive care NEC                  | Surgical and medical procedures                                     |
| Posterior fossa syndrome                                       | Neurological and psychiatric procedural complications                           | Procedural related injuries and complications NEC               | Injury, poisoning and procedural complications                      |
| Paraneoplastic encephalomyelitis                               | Encephalitis NEC                                                                | Central nervous system infections and inflammations             | Nervous system disorders                                            |
| Bone marrow reticulin fibrosis                                 | Haematological disorders                                                        | Haematological disorders NEC                                    | Blood and lymphatic system disorders                                |
| Eccrine carcinoma                                              | Skin neoplasms malignant and unspecified (excl melanoma)                        | Skin neoplasms malignant and unspecified                        | Neoplasms benign, malignant and unspecified (incl cysts and polyps) |
| Langerhans' cell histiocytosis                                 | Histiocytoses                                                                   | Haematopoietic neoplasms (excl leukaemias and lymphomas)        | Neoplasms benign, malignant and unspecified (incl cysts and polyps) |
| Eastern Cooperative Oncology Group performance status improved | Physical examination procedures and organ system status                         | Physical examination and organ system status topics             | Investigations                                                      |
| Cerebellopontine angle tumour                                  | Nervous system neoplasms unspecified malignancy NEC                             | Nervous system neoplasms malignant and unspecified NEC          | Neoplasms benign, malignant and unspecified (incl cysts and polyps) |
| Rectosigmoid cancer metastatic                                 | Colorectal neoplasms malignant                                                  | Gastrointestinal neoplasms malignant and unspecified            | Neoplasms benign, malignant and unspecified (incl cysts and polyps) |
| Large cell lung cancer metastatic                              | Non-small cell neoplasms malignant of the respiratory tract cell type specified | Respiratory and mediastinal neoplasms malignant and unspecified | Neoplasms benign, malignant and unspecified (incl cysts and polyps) |
| Testicular choriocarcinoma recurrent                           | Testicular neoplasms malignant                                                  | Reproductive neoplasms male malignant and unspecified           | Neoplasms benign, malignant and unspecified (incl cysts and polyps) |
| Testis cancer recurrent                                        | Testicular neoplasms malignant                                                  | Reproductive neoplasms male malignant and unspecified           | Neoplasms benign, malignant and unspecified (incl cysts and polyps) |

|                                           |                                                         |                                                                        |                                                                     |
|-------------------------------------------|---------------------------------------------------------|------------------------------------------------------------------------|---------------------------------------------------------------------|
| Renal haemangioma                         | Renal neoplasms benign                                  | Renal and urinary tract neoplasms benign                               | Neoplasms benign, malignant and unspecified (incl cysts and polyps) |
| Metastatic pulmonary embolism             | Oncologic complications and emergencies                 | Neoplasm related morbidities                                           | Neoplasms benign, malignant and unspecified (incl cysts and polyps) |
| Glomus tympanicum tumour                  | Aural neoplasms benign                                  | Miscellaneous and site unspecified neoplasms benign                    | Neoplasms benign, malignant and unspecified (incl cysts and polyps) |
| Anti-androgen withdrawal syndrome         | Withdrawal and rebound effects                          | Therapeutic and nontherapeutic effects (excl toxicity)                 | General disorders and administration site conditions                |
| Denys-Drash syndrome                      | Renal and urinary tract disorders congenital NEC        | Renal and urinary tract disorders congenital                           | Congenital, familial and genetic disorders                          |
| Refractory cancer                         | Neoplasms malignant site unspecified NEC                | Miscellaneous and site unspecified neoplasms malignant and unspecified | Neoplasms benign, malignant and unspecified (incl cysts and polyps) |
| Adenolymphoma                             | Lip and oral cavity neoplasms benign                    | Gastrointestinal neoplasms benign                                      | Neoplasms benign, malignant and unspecified (incl cysts and polyps) |
| Radical cystectomy                        | Bladder therapeutic procedures                          | Renal and urinary tract therapeutic procedures                         | Surgical and medical procedures                                     |
| Skin cryotherapy                          | Skin and subcutaneous tissue therapeutic procedures NEC | Skin and subcutaneous tissue therapeutic procedures                    | Surgical and medical procedures                                     |
| Photodynamic diagnostic procedure         | Imaging procedures NEC                                  | Investigations, imaging and histopathology procedures NEC              | Investigations                                                      |
| Pepsinogen test positive                  | Digestive enzymes                                       | Gastrointestinal investigations                                        | Investigations                                                      |
| Peritoneal gliomatosis                    | Gastrointestinal neoplasms malignancy unspecified NEC   | Gastrointestinal neoplasms malignant and unspecified                   | Neoplasms benign, malignant and unspecified (incl cysts and polyps) |
| Thyroid cancer stage 0                    | Thyroid neoplasms malignant                             | Endocrine neoplasms malignant and unspecified                          | Neoplasms benign, malignant and unspecified (incl cysts and polyps) |
| Thyroid C-cell hyperplasia                | Thyroid disorders NEC                                   | Thyroid gland disorders                                                | Endocrine disorders                                                 |
| Oestrogen receptor positive breast cancer | Breast and nipple neoplasms malignant                   | Breast neoplasms malignant and unspecified (incl nipple)               | Neoplasms benign, malignant and unspecified (incl cysts and polyps) |

|                                              |                                                       |                                                                 |                                                                     |
|----------------------------------------------|-------------------------------------------------------|-----------------------------------------------------------------|---------------------------------------------------------------------|
| Multicentric reticulohistiocytosis           | Histiocytoses                                         | Haematopoietic neoplasms (excl leukaemias and lymphomas)        | Neoplasms benign, malignant and unspecified (incl cysts and polyps) |
| Tumour rupture                               | Oncologic complications and emergencies               | Neoplasm related morbidities                                    | Neoplasms benign, malignant and unspecified (incl cysts and polyps) |
| Knuckle pads                                 | Soft tissue neoplasms benign NEC                      | Soft tissue neoplasms benign                                    | Neoplasms benign, malignant and unspecified (incl cysts and polyps) |
| Mesoblastic nephroma                         | Renal disorders congenital                            | Renal and urinary tract disorders congenital                    | Congenital, familial and genetic disorders                          |
| Urethrectomy                                 | Urethral therapeutic procedures                       | Renal and urinary tract therapeutic procedures                  | Surgical and medical procedures                                     |
| Cementoplasty                                | Bone therapeutic procedures NEC                       | Bone and joint therapeutic procedures                           | Surgical and medical procedures                                     |
| Tumour cell mobilisation                     | Site specific procedural complications NEC            | Procedural related injuries and complications NEC               | Injury, poisoning and procedural complications                      |
| Laryngeal cancer metastatic                  | Laryngeal neoplasms malignant                         | Respiratory and mediastinal neoplasms malignant and unspecified | Neoplasms benign, malignant and unspecified (incl cysts and polyps) |
| Familial haemophagocytic lymphohistiocytosis | Haematological disorders congenital NEC               | Blood and lymphatic system disorders congenital                 | Congenital, familial and genetic disorders                          |
| Ovarian cancer stage I                       | Ovarian neoplasms malignant (excl germ cell)          | Reproductive neoplasms female malignant and unspecified         | Neoplasms benign, malignant and unspecified (incl cysts and polyps) |
| Ovarian cancer stage II                      | Ovarian neoplasms malignant (excl germ cell)          | Reproductive neoplasms female malignant and unspecified         | Neoplasms benign, malignant and unspecified (incl cysts and polyps) |
| Ovarian cancer stage III                     | Ovarian neoplasms malignant (excl germ cell)          | Reproductive neoplasms female malignant and unspecified         | Neoplasms benign, malignant and unspecified (incl cysts and polyps) |
| Ovarian cancer stage IV                      | Ovarian neoplasms malignant (excl germ cell)          | Reproductive neoplasms female malignant and unspecified         | Neoplasms benign, malignant and unspecified (incl cysts and polyps) |
| Inferior vena cava syndrome                  | Site specific necrosis and vascular insufficiency NEC | Arteriosclerosis, stenosis, vascular insufficiency and necrosis | Vascular disorders                                                  |
| Metastases to pelvis                         | Metastases to specified sites                         | Metastases                                                      | Neoplasms benign, malignant and unspecified (incl cysts and polyps) |



|                                              |                                                                     |                                                         |                                                                     |
|----------------------------------------------|---------------------------------------------------------------------|---------------------------------------------------------|---------------------------------------------------------------------|
| Muscle neoplasm                              | Soft tissue neoplasms malignant and unspecified NEC (excl sarcomas) | Soft tissue neoplasms malignant and unspecified         | Neoplasms benign, malignant and unspecified (incl cysts and polyps) |
| Choroidal haemangioma                        | Ocular neoplasms benign                                             | Ocular neoplasms                                        | Neoplasms benign, malignant and unspecified (incl cysts and polyps) |
| Intraductal papillary mucinous neoplasm      | Gastrointestinal neoplasms benign NEC                               | Gastrointestinal neoplasms benign                       | Neoplasms benign, malignant and unspecified (incl cysts and polyps) |
| Prostatic dysplasia                          | Prostatic signs, symptoms and disorders NEC                         | Prostatic disorders (excl infections and inflammations) | Reproductive system and breast disorders                            |
| Abdominal wall neoplasm benign               | Gastrointestinal neoplasms benign NEC                               | Gastrointestinal neoplasms benign                       | Neoplasms benign, malignant and unspecified (incl cysts and polyps) |
| Abdominal wall neoplasm malignant            | Gastrointestinal neoplasms malignant NEC                            | Gastrointestinal neoplasms malignant and unspecified    | Neoplasms benign, malignant and unspecified (incl cysts and polyps) |
| Elephantiasis nostras verrucosa              | Lymphoedemas                                                        | Lymphatic vessel disorders                              | Vascular disorders                                                  |
| Thyroid cancer stage I                       | Thyroid neoplasms malignant                                         | Endocrine neoplasms malignant and unspecified           | Neoplasms benign, malignant and unspecified (incl cysts and polyps) |
| Thyroid cancer stage II                      | Thyroid neoplasms malignant                                         | Endocrine neoplasms malignant and unspecified           | Neoplasms benign, malignant and unspecified (incl cysts and polyps) |
| Thyroid cancer stage III                     | Thyroid neoplasms malignant                                         | Endocrine neoplasms malignant and unspecified           | Neoplasms benign, malignant and unspecified (incl cysts and polyps) |
| Thyroid cancer stage IV                      | Thyroid neoplasms malignant                                         | Endocrine neoplasms malignant and unspecified           | Neoplasms benign, malignant and unspecified (incl cysts and polyps) |
| Eye haemangioma                              | Ocular neoplasms benign                                             | Ocular neoplasms                                        | Neoplasms benign, malignant and unspecified (incl cysts and polyps) |
| Eyelid haemangioma                           | Ocular neoplasms benign                                             | Ocular neoplasms                                        | Neoplasms benign, malignant and unspecified (incl cysts and polyps) |
| Corneoconjunctival intraepithelial neoplasia | Ocular neoplasms malignancy unspecified                             | Ocular neoplasms                                        | Neoplasms benign, malignant and unspecified (incl cysts and polyps) |

|                                        |                                                                            |                                                             |                                                                     |
|----------------------------------------|----------------------------------------------------------------------------|-------------------------------------------------------------|---------------------------------------------------------------------|
| Transitional cell carcinoma metastatic | Urinary tract neoplasms malignant NEC                                      | Renal and urinary tract neoplasms malignant and unspecified | Neoplasms benign, malignant and unspecified (incl cysts and polyps) |
| Hormone-dependent prostate cancer      | Prostatic neoplasms malignant                                              | Reproductive neoplasms male malignant and unspecified       | Neoplasms benign, malignant and unspecified (incl cysts and polyps) |
| Colon dysplasia                        | Gastrointestinal mucosal dystrophies and secretion disorders               | Gastrointestinal conditions NEC                             | Gastrointestinal disorders                                          |
| Angiogenesis biomarker increased       | Cell marker analyses                                                       | Cytogenetic investigations                                  | Investigations                                                      |
| Oesophageal papilloma                  | Upper gastrointestinal neoplasms benign                                    | Gastrointestinal neoplasms benign                           | Neoplasms benign, malignant and unspecified (incl cysts and polyps) |
| Tongue cancer recurrent                | Lip and oral cavity neoplasms malignant                                    | Gastrointestinal neoplasms malignant and unspecified        | Neoplasms benign, malignant and unspecified (incl cysts and polyps) |
| Pleural cyst                           | Pleural conditions NEC                                                     | Pleural disorders                                           | Respiratory, thoracic and mediastinal disorders                     |
| Partial lung resection                 | Bronchial and pulmonary therapeutic procedures                             | Respiratory tract therapeutic procedures                    | Surgical and medical procedures                                     |
| Gorham's disease                       | Non-site specific bone disorders congenital                                | Musculoskeletal and connective tissue disorders congenital  | Congenital, familial and genetic disorders                          |
| Human chorionic gonadotropin increased | Reproductive hormone analyses                                              | Endocrine investigations (incl sex hormones)                | Investigations                                                      |
| Human chorionic gonadotropin positive  | Reproductive hormone analyses                                              | Endocrine investigations (incl sex hormones)                | Investigations                                                      |
| Vocal cord leukoplakia                 | Laryngeal and adjacent sites disorders NEC (excl infections and neoplasms) | Upper respiratory tract disorders (excl infections)         | Respiratory, thoracic and mediastinal disorders                     |
| Salivary gland induration              | Salivary gland disorders NEC                                               | Salivary gland conditions                                   | Gastrointestinal disorders                                          |
| Infected dermal cyst                   | Skin structures and soft tissue infections                                 | Infections - pathogen unspecified                           | Infections and infestations                                         |
| Pancreatic cyst rupture                | Cystic pancreatic disorders                                                | Exocrine pancreas conditions                                | Gastrointestinal disorders                                          |
| Epstein-Barr virus associated lymphoma | B-cell lymphomas NEC                                                       | Lymphomas non-Hodgkin's B-cell                              | Neoplasms benign, malignant and unspecified (incl cysts and polyps) |

|                                                |                                                                                 |                                                                        |                                                                     |
|------------------------------------------------|---------------------------------------------------------------------------------|------------------------------------------------------------------------|---------------------------------------------------------------------|
| Metastatic choriocarcinoma                     | Germ cell neoplasms site unspecified NEC                                        | Miscellaneous and site unspecified neoplasms malignant and unspecified | Neoplasms benign, malignant and unspecified (incl cysts and polyps) |
| Lung squamous cell carcinoma metastatic        | Non-small cell neoplasms malignant of the respiratory tract cell type specified | Respiratory and mediastinal neoplasms malignant and unspecified        | Neoplasms benign, malignant and unspecified (incl cysts and polyps) |
| Non-Hodgkin's lymphoma metastatic              | Non-Hodgkin's lymphomas NEC                                                     | Lymphomas non-Hodgkin's unspecified histology                          | Neoplasms benign, malignant and unspecified (incl cysts and polyps) |
| Head and neck cancer stage IV                  | Neoplasms malignant site unspecified NEC                                        | Miscellaneous and site unspecified neoplasms malignant and unspecified | Neoplasms benign, malignant and unspecified (incl cysts and polyps) |
| Head and neck cancer stage III                 | Neoplasms malignant site unspecified NEC                                        | Miscellaneous and site unspecified neoplasms malignant and unspecified | Neoplasms benign, malignant and unspecified (incl cysts and polyps) |
| Head and neck cancer stage II                  | Neoplasms malignant site unspecified NEC                                        | Miscellaneous and site unspecified neoplasms malignant and unspecified | Neoplasms benign, malignant and unspecified (incl cysts and polyps) |
| Head and neck cancer stage I                   | Neoplasms malignant site unspecified NEC                                        | Miscellaneous and site unspecified neoplasms malignant and unspecified | Neoplasms benign, malignant and unspecified (incl cysts and polyps) |
| Head and neck cancer metastatic                | Neoplasms malignant site unspecified NEC                                        | Miscellaneous and site unspecified neoplasms malignant and unspecified | Neoplasms benign, malignant and unspecified (incl cysts and polyps) |
| Metastatic lymphoma                            | Lymphomas unspecified NEC                                                       | Lymphomas NEC                                                          | Neoplasms benign, malignant and unspecified (incl cysts and polyps) |
| Neuroendocrine carcinoma metastatic            | Endocrine neoplasms malignant and unspecified NEC                               | Endocrine neoplasms malignant and unspecified                          | Neoplasms benign, malignant and unspecified (incl cysts and polyps) |
| Gastrointestinal stromal cancer                | Gastrointestinal neoplasms malignant NEC                                        | Gastrointestinal neoplasms malignant and unspecified                   | Neoplasms benign, malignant and unspecified (incl cysts and polyps) |
| Bladder transitional cell carcinoma metastatic | Bladder neoplasms malignant                                                     | Renal and urinary tract neoplasms malignant and unspecified            | Neoplasms benign, malignant and unspecified (incl cysts and polyps) |
| Sinonasal papilloma                            | Nasal and paranasal sinus neoplasms benign                                      | Respiratory and mediastinal neoplasms benign (excl mesotheliomas)      | Neoplasms benign, malignant and unspecified (incl cysts and polyps) |
| Intravenous leiomyomatosis                     | Uterine neoplasms benign                                                        | Reproductive neoplasms female benign                                   | Neoplasms benign, malignant and unspecified (incl cysts and polyps) |

|                                                                              |                                                       |                                                              |                                                                     |
|------------------------------------------------------------------------------|-------------------------------------------------------|--------------------------------------------------------------|---------------------------------------------------------------------|
| Phyllodes tumour                                                             | Breast neoplasms unspecified malignancy               | Breast neoplasms malignant and unspecified (incl nipple)     | Neoplasms benign, malignant and unspecified (incl cysts and polyps) |
| Anaplastic lymphoma kinase gene and nucleophosmin gene fusion overexpression | Acquired gene mutations and other alterations         | General system disorders NEC                                 | General disorders and administration site conditions                |
| Hypercalcaemia                                                               | Calcium metabolism disorders                          | Bone, calcium, magnesium and phosphorus metabolism disorders | Metabolism and nutrition disorders                                  |
| Radiofrequency ablation of oesophagus                                        | Oesophageal therapeutic procedures                    | Gastrointestinal therapeutic procedures                      | Surgical and medical procedures                                     |
| Benign mesenteric neoplasm                                                   | Gastrointestinal neoplasms benign NEC                 | Gastrointestinal neoplasms benign                            | Neoplasms benign, malignant and unspecified (incl cysts and polyps) |
| Mesenteric neoplasm                                                          | Gastrointestinal neoplasms malignancy unspecified NEC | Gastrointestinal neoplasms malignant and unspecified         | Neoplasms benign, malignant and unspecified (incl cysts and polyps) |
| Congenital melanocytic naevus                                                | Skin and subcutaneous tissue disorders congenital NEC | Skin and subcutaneous tissue disorders congenital            | Congenital, familial and genetic disorders                          |
| Benign nipple neoplasm                                                       | Breast and nipple neoplasms benign                    | Breast neoplasms benign (incl nipple)                        | Neoplasms benign, malignant and unspecified (incl cysts and polyps) |
| Paraneoplastic neurological syndrome                                         | Paraneoplastic syndromes NEC                          | Neoplasm related morbidities                                 | Neoplasms benign, malignant and unspecified (incl cysts and polyps) |
| Acquired thalassaemia                                                        | Thalassaemic disorders                                | Haemoglobinopathies                                          | Blood and lymphatic system disorders                                |
| Meniscus cyst                                                                | Bone and joint injuries NEC                           | Bone and joint injuries                                      | Injury, poisoning and procedural complications                      |
| Thyroid cancer recurrent                                                     | Thyroid neoplasms malignant                           | Endocrine neoplasms malignant and unspecified                | Neoplasms benign, malignant and unspecified (incl cysts and polyps) |
| Carcinoid crisis                                                             | Ectopic endocrine disorders                           | Neoplastic and ectopic endocrinopathies                      | Endocrine disorders                                                 |
| Haemorrhagic thyroid cyst                                                    | Thyroid disorders NEC                                 | Thyroid gland disorders                                      | Endocrine disorders                                                 |
| Neuromyotonia                                                                | Neuromuscular disorders NEC                           | Neuromuscular disorders                                      | Nervous system disorders                                            |
| Peritumoural oedema                                                          | Oncologic complications and emergencies               | Neoplasm related morbidities                                 | Neoplasms benign, malignant and                                     |

|                                                |                                                                                 |                                                                 |                                                                     |
|------------------------------------------------|---------------------------------------------------------------------------------|-----------------------------------------------------------------|---------------------------------------------------------------------|
|                                                |                                                                                 |                                                                 | unspecified (incl cysts and polyps)                                 |
| Encephalitis autoimmune                        | Encephalitis NEC                                                                | Central nervous system infections and inflammations             | Nervous system disorders                                            |
| Malignant neoplasm of pleura metastatic        | Respiratory tract and pleural neoplasms malignant cell type unspecified NEC     | Respiratory and mediastinal neoplasms malignant and unspecified | Neoplasms benign, malignant and unspecified (incl cysts and polyps) |
| Malignant blue naevus                          | Skin melanomas (excl ocular)                                                    | Skin neoplasms malignant and unspecified                        | Neoplasms benign, malignant and unspecified (incl cysts and polyps) |
| Desmoplastic melanoma                          | Skin melanomas (excl ocular)                                                    | Skin neoplasms malignant and unspecified                        | Neoplasms benign, malignant and unspecified (incl cysts and polyps) |
| Spitzoid melanoma                              | Skin melanomas (excl ocular)                                                    | Skin neoplasms malignant and unspecified                        | Neoplasms benign, malignant and unspecified (incl cysts and polyps) |
| Anti-NMDA antibody positive                    | Autoimmunity analyses                                                           | Immunology and allergy investigations                           | Investigations                                                      |
| Anti-VGCC antibody positive                    | Autoimmunity analyses                                                           | Immunology and allergy investigations                           | Investigations                                                      |
| Haemangioma of bone                            | Bone neoplasms benign (excl cysts)                                              | Skeletal neoplasms benign                                       | Neoplasms benign, malignant and unspecified (incl cysts and polyps) |
| Gastrointestinal submucosal tumour             | Gastrointestinal neoplasms malignancy unspecified NEC                           | Gastrointestinal neoplasms malignant and unspecified            | Neoplasms benign, malignant and unspecified (incl cysts and polyps) |
| Thyroid B-cell lymphoma                        | B-cell lymphomas NEC                                                            | Lymphomas non-Hodgkin's B-cell                                  | Neoplasms benign, malignant and unspecified (incl cysts and polyps) |
| White sponge naevus                            | Lip and oral cavity neoplasms benign                                            | Gastrointestinal neoplasms benign                               | Neoplasms benign, malignant and unspecified (incl cysts and polyps) |
| Refractory cytopenia with unilineage dysplasia | Myelodysplastic syndromes                                                       | Leukaemias                                                      | Neoplasms benign, malignant and unspecified (incl cysts and polyps) |
| Pelvic cyst                                    | Pelvis and broad ligament disorders NEC                                         | Uterine, pelvic and broad ligament disorders                    | Reproductive system and breast disorders                            |
| Tonsil cancer metastatic                       | Oropharyngeal, nasopharyngeal and tonsillar neoplasms malignant and unspecified | Respiratory and mediastinal neoplasms malignant and unspecified | Neoplasms benign, malignant and unspecified (incl cysts and polyps) |

|                                                                         |                                                                     |                                                                        |                                                                     |
|-------------------------------------------------------------------------|---------------------------------------------------------------------|------------------------------------------------------------------------|---------------------------------------------------------------------|
| Urethral melanoma metastatic                                            | Urinary tract neoplasms malignant NEC                               | Renal and urinary tract neoplasms malignant and unspecified            | Neoplasms benign, malignant and unspecified (incl cysts and polyps) |
| Immune reconstitution inflammatory syndrome associated Kaposi's sarcoma | Kaposi's sarcomas                                                   | Soft tissue neoplasms malignant and unspecified                        | Neoplasms benign, malignant and unspecified (incl cysts and polyps) |
| Intratumoural aneurysm                                                  | Oncologic complications and emergencies                             | Neoplasm related morbidities                                           | Neoplasms benign, malignant and unspecified (incl cysts and polyps) |
| Breast cyst rupture                                                     | Benign and malignant breast neoplasms                               | Breast disorders                                                       | Reproductive system and breast disorders                            |
| Breast angiosarcoma                                                     | Breast and nipple neoplasms malignant                               | Breast neoplasms malignant and unspecified (incl nipple)               | Neoplasms benign, malignant and unspecified (incl cysts and polyps) |
| Breast angiosarcoma metastatic                                          | Breast and nipple neoplasms malignant                               | Breast neoplasms malignant and unspecified (incl nipple)               | Neoplasms benign, malignant and unspecified (incl cysts and polyps) |
| Tumour fistulisation                                                    | Oncologic complications and emergencies                             | Neoplasm related morbidities                                           | Neoplasms benign, malignant and unspecified (incl cysts and polyps) |
| Lymphatic mapping                                                       | Vascular imaging procedures NEC                                     | Cardiac and vascular investigations (excl enzyme tests)                | Investigations                                                      |
| Skin angiosarcoma                                                       | Skin neoplasms malignant and unspecified (excl melanoma)            | Skin neoplasms malignant and unspecified                               | Neoplasms benign, malignant and unspecified (incl cysts and polyps) |
| Vitreous cyst                                                           | Ocular cysts and polyps                                             | Ocular neoplasms                                                       | Eye disorders                                                       |
| Benign cartilage neoplasm                                               | Cartilage neoplasms benign                                          | Skeletal neoplasms benign                                              | Neoplasms benign, malignant and unspecified (incl cysts and polyps) |
| Chest wall tumour                                                       | Soft tissue neoplasms malignant and unspecified NEC (excl sarcomas) | Soft tissue neoplasms malignant and unspecified                        | Neoplasms benign, malignant and unspecified (incl cysts and polyps) |
| Extragonadal primary germ cell tumour                                   | Extragonadal primary germ cell neoplasms                            | Miscellaneous and site unspecified neoplasms malignant and unspecified | Neoplasms benign, malignant and unspecified (incl cysts and polyps) |
| Extragonadal primary germ cell tumour mixed                             | Extragonadal primary germ cell neoplasms                            | Miscellaneous and site unspecified neoplasms malignant and unspecified | Neoplasms benign, malignant and unspecified (incl cysts and polyps) |
| Extragonadal primary seminoma (pure)                                    | Extragonadal primary germ cell neoplasms                            | Miscellaneous and site unspecified neoplasms                           | Neoplasms benign, malignant and                                     |

|                                            |                                                |                                                                        |                                                                     |
|--------------------------------------------|------------------------------------------------|------------------------------------------------------------------------|---------------------------------------------------------------------|
|                                            |                                                | malignant and unspecified                                              | unspecified (incl cysts and polyps)                                 |
| Malignant neoplasm of unknown primary site | Neoplasms malignant site unspecified NEC       | Miscellaneous and site unspecified neoplasms malignant and unspecified | Neoplasms benign, malignant and unspecified (incl cysts and polyps) |
| Biphasic mesothelioma                      | Mesotheliomas malignant and unspecified        | Mesotheliomas                                                          | Neoplasms benign, malignant and unspecified (incl cysts and polyps) |
| Desmoplastic mesothelioma                  | Mesotheliomas malignant and unspecified        | Mesotheliomas                                                          | Neoplasms benign, malignant and unspecified (incl cysts and polyps) |
| Epithelioid mesothelioma                   | Mesotheliomas malignant and unspecified        | Mesotheliomas                                                          | Neoplasms benign, malignant and unspecified (incl cysts and polyps) |
| Sarcomatoid mesothelioma                   | Mesotheliomas malignant and unspecified        | Mesotheliomas                                                          | Neoplasms benign, malignant and unspecified (incl cysts and polyps) |
| Pericardial mesothelioma malignant         | Mesotheliomas malignant and unspecified        | Mesotheliomas                                                          | Neoplasms benign, malignant and unspecified (incl cysts and polyps) |
| Gallbladder adenosquamous carcinoma        | Gallbladder neoplasms malignant                | Hepatobiliary neoplasms malignant and unspecified                      | Neoplasms benign, malignant and unspecified (incl cysts and polyps) |
| Gallbladder squamous cell carcinoma        | Gallbladder neoplasms malignant                | Hepatobiliary neoplasms malignant and unspecified                      | Neoplasms benign, malignant and unspecified (incl cysts and polyps) |
| Hepatic cancer                             | Hepatic neoplasms malignant                    | Hepatobiliary neoplasms malignant and unspecified                      | Neoplasms benign, malignant and unspecified (incl cysts and polyps) |
| Hepatic cancer recurrent                   | Hepatic neoplasms malignant                    | Hepatobiliary neoplasms malignant and unspecified                      | Neoplasms benign, malignant and unspecified (incl cysts and polyps) |
| Hepatocellular carcinoma                   | Hepatic neoplasms malignant                    | Hepatobiliary neoplasms malignant and unspecified                      | Neoplasms benign, malignant and unspecified (incl cysts and polyps) |
| Gallbladder neoplasm                       | Hepatobiliary neoplasms malignancy unspecified | Hepatobiliary neoplasms malignant and unspecified                      | Neoplasms benign, malignant and unspecified (incl cysts and polyps) |
| Hepatobiliary cancer                       | Hepatobiliary neoplasms malignant NEC          | Hepatobiliary neoplasms malignant and unspecified                      | Neoplasms benign, malignant and unspecified (incl cysts and polyps) |

|                                         |                                                          |                                                          |                                                                     |
|-----------------------------------------|----------------------------------------------------------|----------------------------------------------------------|---------------------------------------------------------------------|
| Hepatobiliary cancer in situ            | Hepatobiliary neoplasms malignant NEC                    | Hepatobiliary neoplasms malignant and unspecified        | Neoplasms benign, malignant and unspecified (incl cysts and polyps) |
| Iris melanoma                           | Ocular melanomas                                         | Ocular neoplasms                                         | Neoplasms benign, malignant and unspecified (incl cysts and polyps) |
| Malignant sweat gland neoplasm          | Skin neoplasms malignant and unspecified (excl melanoma) | Skin neoplasms malignant and unspecified                 | Neoplasms benign, malignant and unspecified (incl cysts and polyps) |
| Hidradenocarcinoma                      | Skin neoplasms malignant and unspecified (excl melanoma) | Skin neoplasms malignant and unspecified                 | Neoplasms benign, malignant and unspecified (incl cysts and polyps) |
| Intraductal proliferative breast lesion | Breast and nipple neoplasms malignant                    | Breast neoplasms malignant and unspecified (incl nipple) | Neoplasms benign, malignant and unspecified (incl cysts and polyps) |
| Invasive ductal breast carcinoma        | Breast and nipple neoplasms malignant                    | Breast neoplasms malignant and unspecified (incl nipple) | Neoplasms benign, malignant and unspecified (incl cysts and polyps) |
| Invasive lobular breast carcinoma       | Breast and nipple neoplasms malignant                    | Breast neoplasms malignant and unspecified (incl nipple) | Neoplasms benign, malignant and unspecified (incl cysts and polyps) |
| Invasive papillary breast carcinoma     | Breast and nipple neoplasms malignant                    | Breast neoplasms malignant and unspecified (incl nipple) | Neoplasms benign, malignant and unspecified (incl cysts and polyps) |
| Lobular breast carcinoma in situ        | Breast and nipple neoplasms malignant                    | Breast neoplasms malignant and unspecified (incl nipple) | Neoplasms benign, malignant and unspecified (incl cysts and polyps) |
| Metaplastic breast carcinoma            | Breast and nipple neoplasms malignant                    | Breast neoplasms malignant and unspecified (incl nipple) | Neoplasms benign, malignant and unspecified (incl cysts and polyps) |
| Mucinous breast carcinoma               | Breast and nipple neoplasms malignant                    | Breast neoplasms malignant and unspecified (incl nipple) | Neoplasms benign, malignant and unspecified (incl cysts and polyps) |
| Neuroendocrine breast tumour            | Breast and nipple neoplasms malignant                    | Breast neoplasms malignant and unspecified (incl nipple) | Neoplasms benign, malignant and unspecified (incl cysts and polyps) |
| Tubular breast carcinoma                | Breast and nipple neoplasms malignant                    | Breast neoplasms malignant and unspecified (incl nipple) | Neoplasms benign, malignant and unspecified (incl cysts and polyps) |
| Bone giant cell tumour malignant        | Bone sarcomas                                            | Skeletal neoplasms malignant and unspecified             | Neoplasms benign, malignant and unspecified (incl cysts and polyps) |



|                                                  |                                                     |                                                        |                                                                     |
|--------------------------------------------------|-----------------------------------------------------|--------------------------------------------------------|---------------------------------------------------------------------|
| Peripheral primitive neuroectodermal bone tumour | Bone sarcomas                                       | Skeletal neoplasms malignant and unspecified           | Neoplasms benign, malignant and unspecified (incl cysts and polyps) |
| Epididymal cancer                                | Reproductive neoplasms male malignant NEC           | Reproductive neoplasms male malignant and unspecified  | Neoplasms benign, malignant and unspecified (incl cysts and polyps) |
| Genital cancer male                              | Reproductive neoplasms male malignant NEC           | Reproductive neoplasms male malignant and unspecified  | Neoplasms benign, malignant and unspecified (incl cysts and polyps) |
| Sertoli cell testicular tumour                   | Reproductive neoplasms male unspecified malignancy  | Reproductive neoplasms male malignant and unspecified  | Neoplasms benign, malignant and unspecified (incl cysts and polyps) |
| Spermatocytic seminoma                           | Testicular neoplasms malignant                      | Reproductive neoplasms male malignant and unspecified  | Neoplasms benign, malignant and unspecified (incl cysts and polyps) |
| Testicular germ cell tumour mixed                | Testicular neoplasms malignant                      | Reproductive neoplasms male malignant and unspecified  | Neoplasms benign, malignant and unspecified (incl cysts and polyps) |
| Testicular malignant teratoma                    | Testicular neoplasms malignant                      | Reproductive neoplasms male malignant and unspecified  | Neoplasms benign, malignant and unspecified (incl cysts and polyps) |
| Testicular yolk sac tumour                       | Testicular neoplasms malignant                      | Reproductive neoplasms male malignant and unspecified  | Neoplasms benign, malignant and unspecified (incl cysts and polyps) |
| Genital cancer male in situ                      | Reproductive neoplasms male malignant NEC           | Reproductive neoplasms male malignant and unspecified  | Neoplasms benign, malignant and unspecified (incl cysts and polyps) |
| Anaplastic meningioma                            | Meningiomas malignant                               | Nervous system neoplasms malignant and unspecified NEC | Neoplasms benign, malignant and unspecified (incl cysts and polyps) |
| Anaplastic oligodendroglioma                     | Glial tumours malignant                             | Nervous system neoplasms malignant and unspecified NEC | Neoplasms benign, malignant and unspecified (incl cysts and polyps) |
| Angiocentric glioma                              | Nervous system neoplasms unspecified malignancy NEC | Nervous system neoplasms malignant and unspecified NEC | Neoplasms benign, malignant and unspecified (incl cysts and polyps) |
| Central nervous system neuroblastoma             | Nervous system neoplasms malignant NEC              | Nervous system neoplasms malignant and unspecified NEC | Neoplasms benign, malignant and unspecified (incl cysts and polyps) |
| Oligoastrocytoma                                 | Glial tumours malignant                             | Nervous system neoplasms malignant and unspecified NEC | Neoplasms benign, malignant and unspecified (incl cysts and polyps) |

|                                                            |                                                                     |                                                 |                                                                     |
|------------------------------------------------------------|---------------------------------------------------------------------|-------------------------------------------------|---------------------------------------------------------------------|
| Plasma cell myeloma in remission                           | Plasma cell myelomas                                                | Plasma cell neoplasms                           | Neoplasms benign, malignant and unspecified (incl cysts and polyps) |
| Plasma cell myeloma recurrent                              | Plasma cell myelomas                                                | Plasma cell neoplasms                           | Neoplasms benign, malignant and unspecified (incl cysts and polyps) |
| Extraskeletal myxoid chondrosarcoma                        | Extraskeletal chondrosarcomas                                       | Soft tissue neoplasms malignant and unspecified | Neoplasms benign, malignant and unspecified (incl cysts and polyps) |
| Dedifferentiated liposarcoma                               | Liposarcomas malignant                                              | Soft tissue neoplasms malignant and unspecified | Neoplasms benign, malignant and unspecified (incl cysts and polyps) |
| Mixed-type liposarcoma                                     | Liposarcomas malignant                                              | Soft tissue neoplasms malignant and unspecified | Neoplasms benign, malignant and unspecified (incl cysts and polyps) |
| Myxoid liposarcoma                                         | Liposarcomas malignant                                              | Soft tissue neoplasms malignant and unspecified | Neoplasms benign, malignant and unspecified (incl cysts and polyps) |
| Pleomorphic liposarcoma                                    | Liposarcomas malignant                                              | Soft tissue neoplasms malignant and unspecified | Neoplasms benign, malignant and unspecified (incl cysts and polyps) |
| Round cell liposarcoma                                     | Liposarcomas malignant                                              | Soft tissue neoplasms malignant and unspecified | Neoplasms benign, malignant and unspecified (incl cysts and polyps) |
| Clear cell sarcoma of soft tissue                          | Soft tissue sarcomas histology unspecified                          | Soft tissue neoplasms malignant and unspecified | Neoplasms benign, malignant and unspecified (incl cysts and polyps) |
| Malignant giant cell fibrous histiocytoma                  | Fibrous histiocytomas malignant                                     | Soft tissue neoplasms malignant and unspecified | Neoplasms benign, malignant and unspecified (incl cysts and polyps) |
| Inflammatory malignant fibrous histiocytoma                | Fibrous histiocytomas malignant                                     | Soft tissue neoplasms malignant and unspecified | Neoplasms benign, malignant and unspecified (incl cysts and polyps) |
| Pleomorphic malignant fibrous histiocytoma                 | Fibrous histiocytomas malignant                                     | Soft tissue neoplasms malignant and unspecified | Neoplasms benign, malignant and unspecified (incl cysts and polyps) |
| Peripheral primitive neuroectodermal tumour of soft tissue | Soft tissue neoplasms malignant and unspecified NEC (excl sarcomas) | Soft tissue neoplasms malignant and unspecified | Neoplasms benign, malignant and unspecified (incl cysts and polyps) |
| Multiple endocrine neoplasia Type 2A                       | Endocrine disorders congenital NEC                                  | Endocrine disorders congenital                  | Congenital, familial and genetic disorders                          |

|                                            |                                                      |                                                             |                                                                     |
|--------------------------------------------|------------------------------------------------------|-------------------------------------------------------------|---------------------------------------------------------------------|
| Multiple endocrine neoplasia Type 2        | Endocrine disorders congenital NEC                   | Endocrine disorders congenital                              | Congenital, familial and genetic disorders                          |
| Multiple endocrine neoplasia Type 1        | Endocrine disorders congenital NEC                   | Endocrine disorders congenital                              | Congenital, familial and genetic disorders                          |
| Multiple endocrine neoplasia Type 2B       | Endocrine disorders congenital NEC                   | Endocrine disorders congenital                              | Congenital, familial and genetic disorders                          |
| Adrenal gland cancer                       | Adrenal neoplasms malignant                          | Endocrine neoplasms malignant and unspecified               | Neoplasms benign, malignant and unspecified (incl cysts and polyps) |
| Familial medullary thyroid cancer          | Endocrine disorders congenital NEC                   | Endocrine disorders congenital                              | Congenital, familial and genetic disorders                          |
| Prostate interstitial hyperthermia therapy | Prostatic therapeutic procedures                     | Male genital tract therapeutic procedures                   | Surgical and medical procedures                                     |
| Prostate cryoablation                      | Prostatic therapeutic procedures                     | Male genital tract therapeutic procedures                   | Surgical and medical procedures                                     |
| Clear cell renal cell carcinoma            | Renal neoplasms malignant                            | Renal and urinary tract neoplasms malignant and unspecified | Neoplasms benign, malignant and unspecified (incl cysts and polyps) |
| Neoadjuvant therapy                        | Therapeutic procedures NEC                           | Therapeutic procedures and supportive care NEC              | Surgical and medical procedures                                     |
| Brenner tumour                             | Female reproductive neoplasms unspecified malignancy | Reproductive neoplasms female malignant and unspecified     | Neoplasms benign, malignant and unspecified (incl cysts and polyps) |
| Ovarian germ cell tumour mixed             | Ovarian germ cell neoplasms malignant                | Reproductive neoplasms female malignant and unspecified     | Neoplasms benign, malignant and unspecified (incl cysts and polyps) |
| Ovarian granulosa cell tumour              | Female reproductive neoplasms unspecified malignancy | Reproductive neoplasms female malignant and unspecified     | Neoplasms benign, malignant and unspecified (incl cysts and polyps) |
| Ovarian theca cell tumour                  | Female reproductive neoplasms unspecified malignancy | Reproductive neoplasms female malignant and unspecified     | Neoplasms benign, malignant and unspecified (incl cysts and polyps) |
| Ovarian germ cell choriocarcinoma          | Ovarian germ cell neoplasms malignant                | Reproductive neoplasms female malignant and unspecified     | Neoplasms benign, malignant and unspecified (incl cysts and polyps) |
| Ovarian germ cell endodermal sinus tumour  | Ovarian germ cell neoplasms malignant                | Reproductive neoplasms female malignant and unspecified     | Neoplasms benign, malignant and unspecified (incl cysts and polyps) |
| Ovarian germ cell polyembryoma             | Ovarian germ cell neoplasms malignant                | Reproductive neoplasms female malignant and unspecified     | Neoplasms benign, malignant and unspecified (incl cysts and polyps) |

|                                                     |                                                                                 |                                                                        |                                                                     |
|-----------------------------------------------------|---------------------------------------------------------------------------------|------------------------------------------------------------------------|---------------------------------------------------------------------|
| Ovarian germ cell teratoma                          | Ovarian germ cell neoplasms malignant                                           | Reproductive neoplasms female malignant and unspecified                | Neoplasms benign, malignant and unspecified (incl cysts and polyps) |
| Borderline mucinous tumour of ovary                 | Female reproductive neoplasms unspecified malignancy                            | Reproductive neoplasms female malignant and unspecified                | Neoplasms benign, malignant and unspecified (incl cysts and polyps) |
| Borderline serous tumour of ovary                   | Female reproductive neoplasms unspecified malignancy                            | Reproductive neoplasms female malignant and unspecified                | Neoplasms benign, malignant and unspecified (incl cysts and polyps) |
| Ovarian clear cell carcinoma                        | Ovarian neoplasms malignant (excl germ cell)                                    | Reproductive neoplasms female malignant and unspecified                | Neoplasms benign, malignant and unspecified (incl cysts and polyps) |
| Ovarian endometrioid carcinoma                      | Ovarian neoplasms malignant (excl germ cell)                                    | Reproductive neoplasms female malignant and unspecified                | Neoplasms benign, malignant and unspecified (incl cysts and polyps) |
| Ovarian Sertoli-Leydig cell tumour                  | Female reproductive neoplasms unspecified malignancy                            | Reproductive neoplasms female malignant and unspecified                | Neoplasms benign, malignant and unspecified (incl cysts and polyps) |
| Pancreastatin increased                             | Gastrointestinal, pancreatic and APUD hormone analyses                          | Endocrine investigations (incl sex hormones)                           | Investigations                                                      |
| Pancreastatin abnormal                              | Gastrointestinal, pancreatic and APUD hormone analyses                          | Endocrine investigations (incl sex hormones)                           | Investigations                                                      |
| Intravascular lipoma                                | Soft tissue neoplasms benign NEC                                                | Soft tissue neoplasms benign                                           | Neoplasms benign, malignant and unspecified (incl cysts and polyps) |
| Keratinising squamous cell carcinoma of nasopharynx | Oropharyngeal, nasopharyngeal and tonsillar neoplasms malignant and unspecified | Respiratory and mediastinal neoplasms malignant and unspecified        | Neoplasms benign, malignant and unspecified (incl cysts and polyps) |
| Nonkeratinising carcinoma of nasopharynx            | Oropharyngeal, nasopharyngeal and tonsillar neoplasms malignant and unspecified | Respiratory and mediastinal neoplasms malignant and unspecified        | Neoplasms benign, malignant and unspecified (incl cysts and polyps) |
| Undifferentiated nasopharyngeal carcinoma           | Oropharyngeal, nasopharyngeal and tonsillar neoplasms malignant and unspecified | Respiratory and mediastinal neoplasms malignant and unspecified        | Neoplasms benign, malignant and unspecified (incl cysts and polyps) |
| Rhabdoid tumour                                     | Neoplasms malignant site unspecified NEC                                        | Miscellaneous and site unspecified neoplasms malignant and unspecified | Neoplasms benign, malignant and unspecified (incl cysts and polyps) |
| Optic glioma                                        | Ocular neoplasms malignancy unspecified                                         | Ocular neoplasms                                                       | Neoplasms benign, malignant and unspecified (incl cysts and polyps) |

|                                                      |                                                                |                                                      |                                                                     |
|------------------------------------------------------|----------------------------------------------------------------|------------------------------------------------------|---------------------------------------------------------------------|
| Gallbladder papilloma                                | Hepatobiliary neoplasms benign                                 | Hepatic and biliary neoplasms benign                 | Neoplasms benign, malignant and unspecified (incl cysts and polyps) |
| Anal squamous cell carcinoma                         | Anal canal neoplasms malignant                                 | Gastrointestinal neoplasms malignant and unspecified | Neoplasms benign, malignant and unspecified (incl cysts and polyps) |
| Adenocarcinoma of appendix                           | Colorectal neoplasms malignant                                 | Gastrointestinal neoplasms malignant and unspecified | Neoplasms benign, malignant and unspecified (incl cysts and polyps) |
| Appendix cancer                                      | Colorectal neoplasms malignant                                 | Gastrointestinal neoplasms malignant and unspecified | Neoplasms benign, malignant and unspecified (incl cysts and polyps) |
| Mucinous adenocarcinoma of appendix                  | Colorectal neoplasms malignant                                 | Gastrointestinal neoplasms malignant and unspecified | Neoplasms benign, malignant and unspecified (incl cysts and polyps) |
| Undifferentiated carcinoma of colon                  | Colorectal neoplasms malignant                                 | Gastrointestinal neoplasms malignant and unspecified | Neoplasms benign, malignant and unspecified (incl cysts and polyps) |
| Acinar cell carcinoma of pancreas                    | Pancreatic neoplasms malignant (excl islet cell and carcinoid) | Gastrointestinal neoplasms malignant and unspecified | Neoplasms benign, malignant and unspecified (incl cysts and polyps) |
| Ductal adenocarcinoma of pancreas                    | Pancreatic neoplasms malignant (excl islet cell and carcinoid) | Gastrointestinal neoplasms malignant and unspecified | Neoplasms benign, malignant and unspecified (incl cysts and polyps) |
| Intraductal papillary-mucinous carcinoma of pancreas | Pancreatic neoplasms malignant (excl islet cell and carcinoid) | Gastrointestinal neoplasms malignant and unspecified | Neoplasms benign, malignant and unspecified (incl cysts and polyps) |
| Mucinous cystadenocarcinoma of pancreas              | Pancreatic neoplasms malignant (excl islet cell and carcinoid) | Gastrointestinal neoplasms malignant and unspecified | Neoplasms benign, malignant and unspecified (incl cysts and polyps) |
| Pancreatoblastoma                                    | Pancreatic neoplasms malignant (excl islet cell and carcinoid) | Gastrointestinal neoplasms malignant and unspecified | Neoplasms benign, malignant and unspecified (incl cysts and polyps) |
| Serous cystadenocarcinoma of pancreas                | Pancreatic neoplasms malignant (excl islet cell and carcinoid) | Gastrointestinal neoplasms malignant and unspecified | Neoplasms benign, malignant and unspecified (incl cysts and polyps) |
| Acinic cell carcinoma of salivary gland              | Salivary gland neoplasms malignant                             | Gastrointestinal neoplasms malignant and unspecified | Neoplasms benign, malignant and unspecified (incl cysts and polyps) |
| Adenoid cystic carcinoma of salivary gland           | Salivary gland neoplasms malignant                             | Gastrointestinal neoplasms malignant and unspecified | Neoplasms benign, malignant and unspecified (incl cysts and polyps) |

|                                              |                                                      |                                                      |                                                                     |
|----------------------------------------------|------------------------------------------------------|------------------------------------------------------|---------------------------------------------------------------------|
| Mucoepidermoid carcinoma of salivary gland   | Salivary gland neoplasms malignant                   | Gastrointestinal neoplasms malignant and unspecified | Neoplasms benign, malignant and unspecified (incl cysts and polyps) |
| Pleomorphic adenoma                          | Lip and oral cavity neoplasms benign                 | Gastrointestinal neoplasms benign                    | Neoplasms benign, malignant and unspecified (incl cysts and polyps) |
| Small intestine adenocarcinoma               | Small intestinal neoplasms malignant                 | Gastrointestinal neoplasms malignant and unspecified | Neoplasms benign, malignant and unspecified (incl cysts and polyps) |
| Large intestine benign neoplasm              | Gastrointestinal neoplasms benign NEC                | Gastrointestinal neoplasms benign                    | Neoplasms benign, malignant and unspecified (incl cysts and polyps) |
| Small intestine polyp                        | Benign neoplasms gastrointestinal (excl oral cavity) | Benign neoplasms gastrointestinal                    | Gastrointestinal disorders                                          |
| Congenital retinoblastoma                    | Retinal disorders congenital                         | Eye disorders congenital                             | Congenital, familial and genetic disorders                          |
| Anaplastic large-cell lymphoma               | Lymphomas unspecified NEC                            | Lymphomas NEC                                        | Neoplasms benign, malignant and unspecified (incl cysts and polyps) |
| Acute undifferentiated leukaemia             | Leukaemias acute NEC                                 | Leukaemias                                           | Neoplasms benign, malignant and unspecified (incl cysts and polyps) |
| B-cell prolymphocytic leukaemia              | B-cell small lymphocytic lymphomas                   | Lymphomas non-Hodgkin's B-cell                       | Neoplasms benign, malignant and unspecified (incl cysts and polyps) |
| Enteropathy-associated T-cell lymphoma       | Intestinal T-cell lymphomas                          | Lymphomas non-Hodgkin's T-cell                       | Neoplasms benign, malignant and unspecified (incl cysts and polyps) |
| Lipodermoid tumour                           | Ocular disorders congenital NEC                      | Eye disorders congenital                             | Congenital, familial and genetic disorders                          |
| Congenital malignant neoplasm                | Congenital disorders NEC                             | Congenital and hereditary disorders NEC              | Congenital, familial and genetic disorders                          |
| Congenital benign neoplasm                   | Congenital disorders NEC                             | Congenital and hereditary disorders NEC              | Congenital, familial and genetic disorders                          |
| Hodgkin's disease nodular sclerosis stage II | Hodgkin's disease nodular sclerosis type             | Lymphomas Hodgkin's disease                          | Neoplasms benign, malignant and unspecified (incl cysts and polyps) |
| Hodgkin's disease nodular sclerosis stage I  | Hodgkin's disease nodular sclerosis type             | Lymphomas Hodgkin's disease                          | Neoplasms benign, malignant and unspecified (incl cysts and polyps) |
| Intraductal papillary breast neoplasm        | Breast and nipple neoplasms malignant                | Breast neoplasms malignant and unspecified           | Neoplasms benign, malignant and unspecified (incl cysts and polyps) |

|                                            |                                                                     |                                                                   |                                                                     |
|--------------------------------------------|---------------------------------------------------------------------|-------------------------------------------------------------------|---------------------------------------------------------------------|
|                                            |                                                                     | (incl nipple)                                                     | unspecified (incl cysts and polyps)                                 |
| Dermatofibrosarcoma protuberans metastatic | Fibrosarcomas malignant                                             | Soft tissue neoplasms malignant and unspecified                   | Neoplasms benign, malignant and unspecified (incl cysts and polyps) |
| Myeloma cast nephropathy                   | Nephropathies and tubular disorders NEC                             | Nephropathies                                                     | Renal and urinary disorders                                         |
| Juvenile angiofibroma                      | Nasal and paranasal sinus neoplasms benign                          | Respiratory and mediastinal neoplasms benign (excl mesotheliomas) | Neoplasms benign, malignant and unspecified (incl cysts and polyps) |
| Intracranial germ cell tumour              | Central nervous system neoplasms malignant NEC                      | Nervous system neoplasms malignant and unspecified NEC            | Neoplasms benign, malignant and unspecified (incl cysts and polyps) |
| Haemophilic pseudotumour                   | Mass conditions NEC                                                 | Tissue disorders NEC                                              | General disorders and administration site conditions                |
| Tumour of ampulla of Vater                 | Hepatobiliary neoplasms malignancy unspecified                      | Hepatobiliary neoplasms malignant and unspecified                 | Neoplasms benign, malignant and unspecified (incl cysts and polyps) |
| Osteofibroma                               | Bone neoplasms benign (excl cysts)                                  | Skeletal neoplasms benign                                         | Neoplasms benign, malignant and unspecified (incl cysts and polyps) |
| Brain sarcoma                              | Central nervous system neoplasms malignant NEC                      | Nervous system neoplasms malignant and unspecified NEC            | Neoplasms benign, malignant and unspecified (incl cysts and polyps) |
| Radioembolisation                          | Radiotherapies site unspecified                                     | Therapeutic procedures and supportive care NEC                    | Surgical and medical procedures                                     |
| Composite lymphoma                         | Lymphomas unclassifiable malignant                                  | Lymphomas NEC                                                     | Neoplasms benign, malignant and unspecified (incl cysts and polyps) |
| Adenosquamous carcinoma of vagina          | Vaginal neoplasms malignant                                         | Reproductive neoplasms female malignant and unspecified           | Neoplasms benign, malignant and unspecified (incl cysts and polyps) |
| Malignant connective tissue neoplasm       | Soft tissue neoplasms malignant and unspecified NEC (excl sarcomas) | Soft tissue neoplasms malignant and unspecified                   | Neoplasms benign, malignant and unspecified (incl cysts and polyps) |
| Benign genitourinary tract neoplasm        | Urinary tract neoplasms benign                                      | Renal and urinary tract neoplasms benign                          | Neoplasms benign, malignant and unspecified (incl cysts and polyps) |
| Malignant genitourinary tract neoplasm     | Urinary tract neoplasms malignant NEC                               | Renal and urinary tract neoplasms malignant                       | Neoplasms benign, malignant and                                     |

|                                       |                                                      |                                                                      |                                                                     |
|---------------------------------------|------------------------------------------------------|----------------------------------------------------------------------|---------------------------------------------------------------------|
|                                       |                                                      | and unspecified                                                      | unspecified (incl cysts and polyps)                                 |
| Cancer surgery                        | Therapeutic procedures NEC                           | Therapeutic procedures and supportive care NEC                       | Surgical and medical procedures                                     |
| Prostate ablation                     | Prostatic therapeutic procedures                     | Male genital tract therapeutic procedures                            | Surgical and medical procedures                                     |
| Gastrointestinal polyp haemorrhage    | Benign neoplasms gastrointestinal (excl oral cavity) | Benign neoplasms gastrointestinal                                    | Gastrointestinal disorders                                          |
| Uterine myoma expulsion               | Uterine neoplasms benign                             | Reproductive neoplasms female benign                                 | Neoplasms benign, malignant and unspecified (incl cysts and polyps) |
| Computerised tomogram breast abnormal | Reproductive organ and breast imaging procedures     | Reproductive organ and breast investigations (excl hormone analyses) | Investigations                                                      |
| Lipoblastoma                          | Soft tissue neoplasms benign NEC                     | Soft tissue neoplasms benign                                         | Neoplasms benign, malignant and unspecified (incl cysts and polyps) |
| Leukostasis syndrome                  | Leukocytoses NEC                                     | White blood cell disorders                                           | Blood and lymphatic system disorders                                |
| Biliary hamartoma                     | Hepatobiliary abnormalities congenital               | Hepatobiliary disorders congenital                                   | Congenital, familial and genetic disorders                          |
| Colloid brain cyst                    | Nervous system cysts and polyps                      | Nervous system neoplasms benign                                      | Nervous system disorders                                            |
| Large intestinal polypectomy          | Large intestine therapeutic procedures               | Gastrointestinal therapeutic procedures                              | Surgical and medical procedures                                     |
| Paraneoplastic rash                   | Rashes, eruptions and exanthems NEC                  | Epidermal and dermal conditions                                      | Skin and subcutaneous tissue disorders                              |
| Angiomyofibroblastoma                 | Soft tissue neoplasms benign NEC                     | Soft tissue neoplasms benign                                         | Neoplasms benign, malignant and unspecified (incl cysts and polyps) |
| Liver ablation                        | Hepatic therapeutic procedures                       | Hepatobiliary therapeutic procedures                                 | Surgical and medical procedures                                     |
| Tongue polyp                          | Benign oral cavity neoplasms                         | Benign neoplasms gastrointestinal                                    | Gastrointestinal disorders                                          |
| Carcinoembryonic antigen decreased    | Cell marker analyses                                 | Cytogenetic investigations                                           | Investigations                                                      |
| Hyperreactio luteinalis               | Ovarian and fallopian tube cysts and neoplasms       | Ovarian and fallopian tube disorders                                 | Reproductive system and breast disorders                            |



#### 4.12 Overdose adverse events

| Preferred term       | High level term                       | High level group term                      | System organ class                             |
|----------------------|---------------------------------------|--------------------------------------------|------------------------------------------------|
| Accidental overdose  | Overdoses                             | Medication errors                          | Injury, poisoning and procedural complications |
| Completed suicide    | Suicidal and self-injurious behaviour | Suicidal and self-injurious behaviours NEC | Psychiatric disorders                          |
| Intentional overdose | Overdoses                             | Medication errors                          | Injury, poisoning and procedural complications |
| Overdose             | Overdoses                             | Medication errors                          | Injury, poisoning and procedural complications |
| Suicide attempt      | Suicidal and self-injurious behaviour | Suicidal and self-injurious behaviours NEC | Psychiatric disorders                          |
| Prescribed overdose  | Overdoses                             | Medication errors                          | Injury, poisoning and procedural complications |

### 4.13 Pancreatic carcinoma adverse events

| Preferred term                             | High level term                                                | High level group term                                | System organ class                                                  |
|--------------------------------------------|----------------------------------------------------------------|------------------------------------------------------|---------------------------------------------------------------------|
| Glucagonoma                                | Islet cell neoplasms and APUDoma NEC                           | Endocrine neoplasms malignant and unspecified        | Neoplasms benign, malignant and unspecified (incl cysts and polyps) |
| Malignant neoplasm of islets of Langerhans | Islet cell neoplasms and APUDoma NEC                           | Endocrine neoplasms malignant and unspecified        | Neoplasms benign, malignant and unspecified (incl cysts and polyps) |
| Pancreatic carcinoma                       | Pancreatic neoplasms malignant (excl islet cell and carcinoid) | Gastrointestinal neoplasms malignant and unspecified | Neoplasms benign, malignant and unspecified (incl cysts and polyps) |
| Pancreatic carcinoma metastatic            | Pancreatic neoplasms malignant (excl islet cell and carcinoid) | Gastrointestinal neoplasms malignant and unspecified | Neoplasms benign, malignant and unspecified (incl cysts and polyps) |
| Pancreatic carcinoma recurrent             | Pancreatic neoplasms malignant (excl islet cell and carcinoid) | Gastrointestinal neoplasms malignant and unspecified | Neoplasms benign, malignant and unspecified (incl cysts and polyps) |
| Metastases to pancreas                     | Metastases to specified sites                                  | Metastases                                           | Neoplasms benign, malignant and unspecified (incl cysts and polyps) |
| Gastrinoma malignant                       | Islet cell neoplasms and APUDoma NEC                           | Endocrine neoplasms malignant and unspecified        | Neoplasms benign, malignant and unspecified (incl cysts and polyps) |
| Adenocarcinoma pancreas                    | Pancreatic neoplasms malignant (excl islet cell and carcinoid) | Gastrointestinal neoplasms malignant and unspecified | Neoplasms benign, malignant and unspecified (incl cysts and polyps) |
| Pancreatic sarcoma                         | Pancreatic neoplasms malignant (excl islet cell and carcinoid) | Gastrointestinal neoplasms malignant and unspecified | Neoplasms benign, malignant and unspecified (incl cysts and polyps) |
| Carcinoid tumour of the pancreas           | Carcinoid tumours                                              | Endocrine neoplasms malignant and unspecified        | Neoplasms benign, malignant and unspecified (incl cysts and polyps) |
| Pancreatic carcinoma stage 0               | Pancreatic neoplasms malignant (excl islet cell and carcinoid) | Gastrointestinal neoplasms malignant and unspecified | Neoplasms benign, malignant and unspecified (incl cysts and polyps) |
| Pancreatic carcinoma stage I               | Pancreatic neoplasms malignant (excl islet cell and carcinoid) | Gastrointestinal neoplasms malignant and unspecified | Neoplasms benign, malignant and unspecified (incl cysts and polyps) |
| Pancreatic carcinoma stage II              | Pancreatic neoplasms malignant (excl islet cell and            | Gastrointestinal neoplasms malignant and             | Neoplasms benign, malignant and unspecified (incl cysts             |

|                                                      |                                                                |                                                      |                                                                     |
|------------------------------------------------------|----------------------------------------------------------------|------------------------------------------------------|---------------------------------------------------------------------|
|                                                      | carcinoid)                                                     | unspecified                                          | and polyps)                                                         |
| Pancreatic carcinoma stage III                       | Pancreatic neoplasms malignant (excl islet cell and carcinoid) | Gastrointestinal neoplasms malignant and unspecified | Neoplasms benign, malignant and unspecified (incl cysts and polyps) |
| Pancreatic carcinoma stage IV                        | Pancreatic neoplasms malignant (excl islet cell and carcinoid) | Gastrointestinal neoplasms malignant and unspecified | Neoplasms benign, malignant and unspecified (incl cysts and polyps) |
| Pancreatic neuroendocrine tumour                     | Islet cell neoplasms and APUDoma NEC                           | Endocrine neoplasms malignant and unspecified        | Neoplasms benign, malignant and unspecified (incl cysts and polyps) |
| Pancreatic neuroendocrine tumour metastatic          | Islet cell neoplasms and APUDoma NEC                           | Endocrine neoplasms malignant and unspecified        | Neoplasms benign, malignant and unspecified (incl cysts and polyps) |
| Solid pseudopapillary tumour of the pancreas         | Pancreatic neoplasms malignant (excl islet cell and carcinoid) | Gastrointestinal neoplasms malignant and unspecified | Neoplasms benign, malignant and unspecified (incl cysts and polyps) |
| Acinar cell carcinoma of pancreas                    | Pancreatic neoplasms malignant (excl islet cell and carcinoid) | Gastrointestinal neoplasms malignant and unspecified | Neoplasms benign, malignant and unspecified (incl cysts and polyps) |
| Ductal adenocarcinoma of pancreas                    | Pancreatic neoplasms malignant (excl islet cell and carcinoid) | Gastrointestinal neoplasms malignant and unspecified | Neoplasms benign, malignant and unspecified (incl cysts and polyps) |
| Intraductal papillary-mucinous carcinoma of pancreas | Pancreatic neoplasms malignant (excl islet cell and carcinoid) | Gastrointestinal neoplasms malignant and unspecified | Neoplasms benign, malignant and unspecified (incl cysts and polyps) |
| Mucinous cystadenocarcinoma of pancreas              | Pancreatic neoplasms malignant (excl islet cell and carcinoid) | Gastrointestinal neoplasms malignant and unspecified | Neoplasms benign, malignant and unspecified (incl cysts and polyps) |
| Pancreatoblastoma                                    | Pancreatic neoplasms malignant (excl islet cell and carcinoid) | Gastrointestinal neoplasms malignant and unspecified | Neoplasms benign, malignant and unspecified (incl cysts and polyps) |
| Serous cystadenocarcinoma of pancreas                | Pancreatic neoplasms malignant (excl islet cell and carcinoid) | Gastrointestinal neoplasms malignant and unspecified | Neoplasms benign, malignant and unspecified (incl cysts and polyps) |

#### 4.14 Pancreatitis adverse events

| Preferred term                 | High level term                           | High level group term                       | System organ class                         |
|--------------------------------|-------------------------------------------|---------------------------------------------|--------------------------------------------|
| Pancreatic haemorrhage         | Pancreatic disorders NEC                  | Exocrine pancreas conditions                | Gastrointestinal disorders                 |
| Pancreatic pseudocyst          | Cystic pancreatic disorders               | Exocrine pancreas conditions                | Gastrointestinal disorders                 |
| Pancreatic pseudocyst drainage | Pancreatic therapeutic procedures         | Gastrointestinal therapeutic procedures     | Surgical and medical procedures            |
| Pancreatitis                   | Acute and chronic pancreatitis            | Exocrine pancreas conditions                | Gastrointestinal disorders                 |
| Pancreatitis acute             | Acute and chronic pancreatitis            | Exocrine pancreas conditions                | Gastrointestinal disorders                 |
| Pancreatitis chronic           | Acute and chronic pancreatitis            | Exocrine pancreas conditions                | Gastrointestinal disorders                 |
| Pancreatitis haemorrhagic      | Acute and chronic pancreatitis            | Exocrine pancreas conditions                | Gastrointestinal disorders                 |
| Pancreatitis mumps             | Mumps viral infections                    | Viral infectious disorders                  | Infections and infestations                |
| Pancreatitis necrotising       | Acute and chronic pancreatitis            | Exocrine pancreas conditions                | Gastrointestinal disorders                 |
| Pancreatitis relapsing         | Acute and chronic pancreatitis            | Exocrine pancreas conditions                | Gastrointestinal disorders                 |
| Pancreatic abscess             | Abdominal and gastrointestinal infections | Infections - pathogen unspecified           | Infections and infestations                |
| Cytomegalovirus pancreatitis   | Cytomegaloviral infections                | Viral infectious disorders                  | Infections and infestations                |
| Pancreas infection             | Abdominal and gastrointestinal infections | Infections - pathogen unspecified           | Infections and infestations                |
| Oedematous pancreatitis        | Acute and chronic pancreatitis            | Exocrine pancreas conditions                | Gastrointestinal disorders                 |
| Pancreatorenal syndrome        | Renal failure and impairment              | Renal disorders (excl nephropathies)        | Renal and urinary disorders                |
| Pancreatic phlegmon            | Acute and chronic pancreatitis            | Exocrine pancreas conditions                | Gastrointestinal disorders                 |
| Hereditary pancreatitis        | Pancreatic disorders congenital           | Gastrointestinal tract disorders congenital | Congenital, familial and genetic disorders |
| Alcoholic pancreatitis         | Acute and chronic pancreatitis            | Exocrine pancreas conditions                | Gastrointestinal disorders                 |

|                         |                                |                                |                                        |
|-------------------------|--------------------------------|--------------------------------|----------------------------------------|
| Pancreatic necrosis     | Pancreatic disorders NEC       | Exocrine pancreas conditions   | Gastrointestinal disorders             |
| Cullen's sign           | Purpura and related conditions | Skin vascular abnormalities    | Skin and subcutaneous tissue disorders |
| Pancreatitis helminthic | Helminthic infections NEC      | Helminthic disorders           | Infections and infestations            |
| Pancreatitis fungal     | Fungal infections NEC          | Fungal infectious disorders    | Infections and infestations            |
| Pancreatitis bacterial  | Bacterial infections NEC       | Bacterial infectious disorders | Infections and infestations            |
| Pancreatitis viral      | Viral infections NEC           | Viral infectious disorders     | Infections and infestations            |
| Ischaemic pancreatitis  | Acute and chronic pancreatitis | Exocrine pancreas conditions   | Gastrointestinal disorders             |
| Lupus pancreatitis      | Acute and chronic pancreatitis | Exocrine pancreas conditions   | Gastrointestinal disorders             |
| Autoimmune pancreatitis | Acute and chronic pancreatitis | Exocrine pancreas conditions   | Gastrointestinal disorders             |

#### 4.15 Thyroid adverse events

| Preferred term                              | High level term                                        | High level group term                         | System organ class                                                  |
|---------------------------------------------|--------------------------------------------------------|-----------------------------------------------|---------------------------------------------------------------------|
| Anaplastic thyroid cancer                   | Thyroid neoplasms malignant                            | Endocrine neoplasms malignant and unspecified | Neoplasms benign, malignant and unspecified (incl cysts and polyps) |
| Basedow's disease                           | Thyroid hyperfunction disorders                        | Thyroid gland disorders                       | Endocrine disorders                                                 |
| Benign neoplasm of thyroid gland            | Thyroid neoplasms benign                               | Endocrine neoplasms benign                    | Neoplasms benign, malignant and unspecified (incl cysts and polyps) |
| Biopsy thyroid gland abnormal               | Thyroid histopathology procedures                      | Endocrine investigations (incl sex hormones)  | Investigations                                                      |
| Blood calcitonin abnormal                   | Gastrointestinal, pancreatic and APUD hormone analyses | Endocrine investigations (incl sex hormones)  | Investigations                                                      |
| Blood calcitonin increased                  | Gastrointestinal, pancreatic and APUD hormone analyses | Endocrine investigations (incl sex hormones)  | Investigations                                                      |
| Blood thyroid stimulating hormone abnormal  | Pituitary analyses anterior                            | Endocrine investigations (incl sex hormones)  | Investigations                                                      |
| Blood thyroid stimulating hormone decreased | Pituitary analyses anterior                            | Endocrine investigations (incl sex hormones)  | Investigations                                                      |
| Blood thyroid stimulating hormone increased | Pituitary analyses anterior                            | Endocrine investigations (incl sex hormones)  | Investigations                                                      |
| Butanol-extractable iodine decreased        | Thyroid analyses                                       | Endocrine investigations (incl sex hormones)  | Investigations                                                      |
| Butanol-extractable iodine increased        | Thyroid analyses                                       | Endocrine investigations (incl sex hormones)  | Investigations                                                      |
| Calcitonin secretion disorder               | Thyroid disorders NEC                                  | Thyroid gland disorders                       | Endocrine disorders                                                 |
| Congenital hypothyroidism                   | Thyroid disorders congenital                           | Endocrine disorders congenital                | Congenital, familial and genetic disorders                          |
| Ectopic calcitonin production               | Ectopic endocrine disorders                            | Neoplastic and ectopic endocrinopathies       | Endocrine disorders                                                 |
| Euthyroid sick syndrome                     | Thyroid disorders NEC                                  | Thyroid gland disorders                       | Endocrine disorders                                                 |

|                                           |                                                        |                                                        |                                                                     |
|-------------------------------------------|--------------------------------------------------------|--------------------------------------------------------|---------------------------------------------------------------------|
| Exophthalmos                              | Structural change, deposit and degeneration of eye NEC | Ocular structural change, deposit and degeneration NEC | Eye disorders                                                       |
| Follicular thyroid cancer                 | Thyroid neoplasms malignant                            | Endocrine neoplasms malignant and unspecified          | Neoplasms benign, malignant and unspecified (incl cysts and polyps) |
| Gamma radiation therapy to thyroid        | Thyroid radiotherapies                                 | Endocrine gland therapeutic procedures                 | Surgical and medical procedures                                     |
| Generalised resistance to thyroid hormone | Thyroid disorders congenital                           | Endocrine disorders congenital                         | Congenital, familial and genetic disorders                          |
| Goitre                                    | Thyroid disorders NEC                                  | Thyroid gland disorders                                | Endocrine disorders                                                 |
| Goitre congenital                         | Thyroid disorders congenital                           | Endocrine disorders congenital                         | Congenital, familial and genetic disorders                          |
| Hyperthyroidism                           | Thyroid hyperfunction disorders                        | Thyroid gland disorders                                | Endocrine disorders                                                 |
| Hypothyroidism                            | Thyroid hypofunction disorders                         | Thyroid gland disorders                                | Endocrine disorders                                                 |
| Iodine uptake abnormal                    | Thyroid analyses                                       | Endocrine investigations (incl sex hormones)           | Investigations                                                      |
| Iodine uptake decreased                   | Thyroid analyses                                       | Endocrine investigations (incl sex hormones)           | Investigations                                                      |
| Iodine uptake increased                   | Thyroid analyses                                       | Endocrine investigations (incl sex hormones)           | Investigations                                                      |
| Lid lag                                   | Eyelid movement disorders                              | Ocular neuromuscular disorders                         | Eye disorders                                                       |
| Medullary thyroid cancer                  | Thyroid neoplasms malignant                            | Endocrine neoplasms malignant and unspecified          | Neoplasms benign, malignant and unspecified (incl cysts and polyps) |
| Myxoedema                                 | Thyroid hypofunction disorders                         | Thyroid gland disorders                                | Endocrine disorders                                                 |
| Papillary thyroid cancer                  | Thyroid neoplasms malignant                            | Endocrine neoplasms malignant and unspecified          | Neoplasms benign, malignant and unspecified (incl cysts and polyps) |
| Photon radiation therapy to thyroid       | Thyroid radiotherapies                                 | Endocrine gland therapeutic procedures                 | Surgical and medical procedures                                     |
| Primary hypothyroidism                    | Thyroid hypofunction disorders                         | Thyroid gland disorders                                | Endocrine disorders                                                 |
| Protein bound iodine decreased            | Thyroid analyses                                       | Endocrine investigations (incl sex hormones)           | Investigations                                                      |

|                                                   |                                                   |                                               |                                                                     |
|---------------------------------------------------|---------------------------------------------------|-----------------------------------------------|---------------------------------------------------------------------|
| Protein bound iodine increased                    | Thyroid analyses                                  | Endocrine investigations (incl sex hormones)  | Investigations                                                      |
| Radioactive iodine therapy                        | Thyroid radiotherapies                            | Endocrine gland therapeutic procedures        | Surgical and medical procedures                                     |
| Secondary hypothyroidism                          | Thyroid hypofunction disorders                    | Thyroid gland disorders                       | Endocrine disorders                                                 |
| Tertiary hypothyroidism                           | Thyroid hypofunction disorders                    | Thyroid gland disorders                       | Endocrine disorders                                                 |
| Thyroid adenoma                                   | Thyroid neoplasms benign                          | Endocrine neoplasms benign                    | Neoplasms benign, malignant and unspecified (incl cysts and polyps) |
| Thyroid atrophy                                   | Thyroid hypofunction disorders                    | Thyroid gland disorders                       | Endocrine disorders                                                 |
| Thyroid cyst                                      | Thyroid neoplasms                                 | Thyroid gland disorders                       | Endocrine disorders                                                 |
| Thyroid disorder                                  | Thyroid disorders NEC                             | Thyroid gland disorders                       | Endocrine disorders                                                 |
| Thyroid echinococcosis                            | Cestode infections                                | Helminthic disorders                          | Infections and infestations                                         |
| Thyroid electron radiation therapy                | Thyroid radiotherapies                            | Endocrine gland therapeutic procedures        | Surgical and medical procedures                                     |
| Thyroid function test abnormal                    | Thyroid analyses                                  | Endocrine investigations (incl sex hormones)  | Investigations                                                      |
| Thyroid infarction                                | Thyroid disorders NEC                             | Thyroid gland disorders                       | Endocrine disorders                                                 |
| Thyroid neoplasm                                  | Endocrine neoplasms malignant and unspecified NEC | Endocrine neoplasms malignant and unspecified | Neoplasms benign, malignant and unspecified (incl cysts and polyps) |
| Thyroid pain                                      | Thyroid disorders NEC                             | Thyroid gland disorders                       | Endocrine disorders                                                 |
| Thyroid releasing hormone challenge test abnormal | Hypothalamic analyses                             | Endocrine investigations (incl sex hormones)  | Investigations                                                      |
| Thyroid tuberculosis                              | Tuberculous infections                            | Mycobacterial infectious disorders            | Infections and infestations                                         |
| Thyroiditis                                       | Acute and chronic thyroiditis                     | Thyroid gland disorders                       | Endocrine disorders                                                 |
| Thyroiditis acute                                 | Acute and chronic thyroiditis                     | Thyroid gland disorders                       | Endocrine disorders                                                 |
| Thyroiditis chronic                               | Acute and chronic thyroiditis                     | Thyroid gland disorders                       | Endocrine disorders                                                 |



|                                    |                                 |                                              |                                                                     |
|------------------------------------|---------------------------------|----------------------------------------------|---------------------------------------------------------------------|
| Thyroiditis fibrous chronic        | Acute and chronic thyroiditis   | Thyroid gland disorders                      | Endocrine disorders                                                 |
| Thyroiditis subacute               | Acute and chronic thyroiditis   | Thyroid gland disorders                      | Endocrine disorders                                                 |
| Thyrotoxic crisis                  | Thyroid hyperfunction disorders | Thyroid gland disorders                      | Endocrine disorders                                                 |
| Thyrotoxic periodic paralysis      | Thyroid hyperfunction disorders | Thyroid gland disorders                      | Endocrine disorders                                                 |
| Thyroxine abnormal                 | Thyroid analyses                | Endocrine investigations (incl sex hormones) | Investigations                                                      |
| Thyroxine decreased                | Thyroid analyses                | Endocrine investigations (incl sex hormones) | Investigations                                                      |
| Thyroxine increased                | Thyroid analyses                | Endocrine investigations (incl sex hormones) | Investigations                                                      |
| Toxic nodular goitre               | Thyroid hyperfunction disorders | Thyroid gland disorders                      | Endocrine disorders                                                 |
| Tri-iodothyronine abnormal         | Thyroid analyses                | Endocrine investigations (incl sex hormones) | Investigations                                                      |
| Tri-iodothyronine decreased        | Thyroid analyses                | Endocrine investigations (incl sex hormones) | Investigations                                                      |
| Tri-iodothyronine increased        | Thyroid analyses                | Endocrine investigations (incl sex hormones) | Investigations                                                      |
| Tri-iodothyronine uptake decreased | Thyroid analyses                | Endocrine investigations (incl sex hormones) | Investigations                                                      |
| Tri-iodothyronine uptake increased | Thyroid analyses                | Endocrine investigations (incl sex hormones) | Investigations                                                      |
| X-ray therapy to thyroid           | Thyroid radiotherapies          | Endocrine gland therapeutic procedures       | Surgical and medical procedures                                     |
| Autoimmune thyroiditis             | Acute and chronic thyroiditis   | Thyroid gland disorders                      | Endocrine disorders                                                 |
| Metastases to thyroid              | Metastases to specified sites   | Metastases                                   | Neoplasms benign, malignant and unspecified (incl cysts and polyps) |
| Free thyroxine index abnormal      | Thyroid analyses                | Endocrine investigations (incl sex hormones) | Investigations                                                      |
| Free thyroxine index decreased     | Thyroid analyses                | Endocrine investigations (incl sex hormones) | Investigations                                                      |
| Free thyroxine index increased     | Thyroid analyses                | Endocrine investigations (incl sex hormones) | Investigations                                                      |
| Thyroglossal cyst                  | Thyroid disorders congenital    | Endocrine disorders congenital               | Congenital, familial and genetic disorders                          |

|                                     |                                 |                                               |                                                                     |
|-------------------------------------|---------------------------------|-----------------------------------------------|---------------------------------------------------------------------|
| Thyroxin binding globulin increased | Thyroid analyses                | Endocrine investigations (incl sex hormones)  | Investigations                                                      |
| Thyroxin binding globulin decreased | Thyroid analyses                | Endocrine investigations (incl sex hormones)  | Investigations                                                      |
| Thyroxin binding globulin abnormal  | Thyroid analyses                | Endocrine investigations (incl sex hormones)  | Investigations                                                      |
| Thyroid gland abscess               | Infections NEC                  | Infections - pathogen unspecified             | Infections and infestations                                         |
| Thyroglossal cyst infection         | Infections NEC                  | Infections - pathogen unspecified             | Infections and infestations                                         |
| Thyroxine therapy                   | Thyroid therapeutic procedures  | Endocrine gland therapeutic procedures        | Surgical and medical procedures                                     |
| Secondary hyperthyroidism           | Thyroid hyperfunction disorders | Thyroid gland disorders                       | Endocrine disorders                                                 |
| Tri-iodothyronine free increased    | Thyroid analyses                | Endocrine investigations (incl sex hormones)  | Investigations                                                      |
| Tri-iodothyronine free decreased    | Thyroid analyses                | Endocrine investigations (incl sex hormones)  | Investigations                                                      |
| Tri-iodothyronine free normal       | Thyroid analyses                | Endocrine investigations (incl sex hormones)  | Investigations                                                      |
| Tri-iodothyronine free abnormal     | Thyroid analyses                | Endocrine investigations (incl sex hormones)  | Investigations                                                      |
| Thyroglobulin increased             | Thyroid analyses                | Endocrine investigations (incl sex hormones)  | Investigations                                                      |
| Thyroglobulin decreased             | Thyroid analyses                | Endocrine investigations (incl sex hormones)  | Investigations                                                      |
| Thyroglobulin present               | Thyroid analyses                | Endocrine investigations (incl sex hormones)  | Investigations                                                      |
| Thyroglobulin absent                | Thyroid analyses                | Endocrine investigations (incl sex hormones)  | Investigations                                                      |
| Thyroid cancer metastatic           | Thyroid neoplasms malignant     | Endocrine neoplasms malignant and unspecified | Neoplasms benign, malignant and unspecified (incl cysts and polyps) |
| Thyroxine free abnormal             | Thyroid analyses                | Endocrine investigations (incl sex hormones)  | Investigations                                                      |
| Thyroxine free decreased            | Thyroid analyses                | Endocrine investigations (incl sex hormones)  | Investigations                                                      |
| Thyroxine free increased            | Thyroid analyses                | Endocrine investigations (incl sex hormones)  | Investigations                                                      |
| Thyroid dysfunction in pregnancy    | Thyroid disorders NEC           | Thyroid gland disorders                       | Endocrine disorders                                                 |

|                                     |                                                        |                                                        |                                                |
|-------------------------------------|--------------------------------------------------------|--------------------------------------------------------|------------------------------------------------|
| Thyroid mass                        | Thyroid disorders NEC                                  | Thyroid gland disorders                                | Endocrine disorders                            |
| Hypothyroidic goitre                | Thyroid hypofunction disorders                         | Thyroid gland disorders                                | Endocrine disorders                            |
| Reverse tri-iodothyronine increased | Thyroid analyses                                       | Endocrine investigations (incl sex hormones)           | Investigations                                 |
| Reverse tri-iodothyronine decreased | Thyroid analyses                                       | Endocrine investigations (incl sex hormones)           | Investigations                                 |
| Anti-thyroid antibody positive      | Thyroid analyses                                       | Endocrine investigations (incl sex hormones)           | Investigations                                 |
| Anti-thyroid antibody               | Thyroid analyses                                       | Endocrine investigations (incl sex hormones)           | Investigations                                 |
| Endocrine ophthalmopathy            | Structural change, deposit and degeneration of eye NEC | Ocular structural change, deposit and degeneration NEC | Eye disorders                                  |
| Myxoedema coma                      | Coma states                                            | Neurological disorders NEC                             | Nervous system disorders                       |
| Ultrasound thyroid abnormal         | Endocrine analyses and imaging NEC                     | Endocrine investigations (incl sex hormones)           | Investigations                                 |
| Radiotherapy to thyroid             | Thyroid radiotherapies                                 | Endocrine gland therapeutic procedures                 | Surgical and medical procedures                |
| Thyroid malformation                | Thyroid disorders congenital                           | Endocrine disorders congenital                         | Congenital, familial and genetic disorders     |
| Thyroid operation                   | Thyroid therapeutic procedures                         | Endocrine gland therapeutic procedures                 | Surgical and medical procedures                |
| Thyroidectomy                       | Thyroid therapeutic procedures                         | Endocrine gland therapeutic procedures                 | Surgical and medical procedures                |
| Thyroid gland scan abnormal         | Endocrine analyses and imaging NEC                     | Endocrine investigations (incl sex hormones)           | Investigations                                 |
| Tri-iodothyronine uptake abnormal   | Thyroid analyses                                       | Endocrine investigations (incl sex hormones)           | Investigations                                 |
| Congenital hyperthyroidism          | Thyroid disorders congenital                           | Endocrine disorders congenital                         | Congenital, familial and genetic disorders     |
| Thyroglossal fistula                | Thyroid disorders congenital                           | Endocrine disorders congenital                         | Congenital, familial and genetic disorders     |
| Radiation thyroiditis               | Radiation injuries                                     | Injuries by physical agents                            | Injury, poisoning and procedural complications |
| Thyroid haemorrhage                 | Thyroid disorders NEC                                  | Thyroid gland disorders                                | Endocrine disorders                            |
| Post procedural hypothyroidism      | Endocrine procedural complications                     | Procedural related injuries and complications NEC      | Injury, poisoning and procedural complications |

|                                     |                                 |                                               |                                                                     |
|-------------------------------------|---------------------------------|-----------------------------------------------|---------------------------------------------------------------------|
| Thyroid therapy                     | Thyroid therapeutic procedures  | Endocrine gland therapeutic procedures        | Surgical and medical procedures                                     |
| Thyreostatic therapy                | Thyroid therapeutic procedures  | Endocrine gland therapeutic procedures        | Surgical and medical procedures                                     |
| Huerthle cell carcinoma             | Thyroid neoplasms malignant     | Endocrine neoplasms malignant and unspecified | Neoplasms benign, malignant and unspecified (incl cysts and polyps) |
| Thyroid cancer                      | Thyroid neoplasms malignant     | Endocrine neoplasms malignant and unspecified | Neoplasms benign, malignant and unspecified (incl cysts and polyps) |
| Hashitoxicosis                      | Endocrine autoimmune disorders  | Autoimmune disorders                          | Immune system disorders                                             |
| Thyroid hormone replacement therapy | Thyroid therapeutic procedures  | Endocrine gland therapeutic procedures        | Surgical and medical procedures                                     |
| Thyroid fibrosis                    | Thyroid disorders NEC           | Thyroid gland disorders                       | Endocrine disorders                                                 |
| Marine Lenhart syndrome             | Thyroid hyperfunction disorders | Thyroid gland disorders                       | Endocrine disorders                                                 |
| Hashimoto's encephalopathy          | Encephalopathies NEC            | Encephalopathies                              | Nervous system disorders                                            |
| Ectopic thyroid                     | Thyroid disorders congenital    | Endocrine disorders congenital                | Congenital, familial and genetic disorders                          |
| Thyroid dermatopathy                | Thyroid hyperfunction disorders | Thyroid gland disorders                       | Endocrine disorders                                                 |
| Thyroid cancer stage 0              | Thyroid neoplasms malignant     | Endocrine neoplasms malignant and unspecified | Neoplasms benign, malignant and unspecified (incl cysts and polyps) |
| Thyroid C-cell hyperplasia          | Thyroid disorders NEC           | Thyroid gland disorders                       | Endocrine disorders                                                 |
| Thyroid cancer stage I              | Thyroid neoplasms malignant     | Endocrine neoplasms malignant and unspecified | Neoplasms benign, malignant and unspecified (incl cysts and polyps) |
| Thyroid cancer stage II             | Thyroid neoplasms malignant     | Endocrine neoplasms malignant and unspecified | Neoplasms benign, malignant and unspecified (incl cysts and polyps) |
| Thyroid cancer stage III            | Thyroid neoplasms malignant     | Endocrine neoplasms malignant and unspecified | Neoplasms benign, malignant and unspecified (incl cysts and polyps) |
| Thyroid cancer stage IV             | Thyroid neoplasms malignant     | Endocrine neoplasms malignant and unspecified | Neoplasms benign, malignant and unspecified (incl cysts and polyps) |

|                                              |                                        |                                                              |                                                                     |
|----------------------------------------------|----------------------------------------|--------------------------------------------------------------|---------------------------------------------------------------------|
| Infectious thyroiditis                       | Infections NEC                         | Infections - pathogen unspecified                            | Infections and infestations                                         |
| Thyroid stimulating immunoglobulin increased | Thyroid analyses                       | Endocrine investigations (incl sex hormones)                 | Investigations                                                      |
| Hypercalcaemia                               | Calcium metabolism disorders           | Bone, calcium, magnesium and phosphorus metabolism disorders | Metabolism and nutrition disorders                                  |
| Orbital decompression                        | Orbit and globe therapeutic procedures | Eye therapeutic procedures                                   | Surgical and medical procedures                                     |
| Thyroid cancer recurrent                     | Thyroid neoplasms malignant            | Endocrine neoplasms malignant and unspecified                | Neoplasms benign, malignant and unspecified (incl cysts and polyps) |
| Haemorrhagic thyroid cyst                    | Thyroid disorders NEC                  | Thyroid gland disorders                                      | Endocrine disorders                                                 |
| Thyroid B-cell lymphoma                      | B-cell lymphomas NEC                   | Lymphomas non-Hodgkin's B-cell                               | Neoplasms benign, malignant and unspecified (incl cysts and polyps) |
| Thyroid size decreased                       | Thyroid disorders NEC                  | Thyroid gland disorders                                      | Endocrine disorders                                                 |
| Antithyroid arthritis syndrome               | Arthropathies NEC                      | Joint disorders                                              | Musculoskeletal and connective tissue disorders                     |
| Familial medullary thyroid cancer            | Endocrine disorders congenital NEC     | Endocrine disorders congenital                               | Congenital, familial and genetic disorders                          |

## 4.16 Transmission adverse events

| Preferred term                              | High level term              | High level group term       | System organ class          |
|---------------------------------------------|------------------------------|-----------------------------|-----------------------------|
| Air-borne transmission                      | Infectious transmissions     | Ancillary infectious topics | Infections and infestations |
| Bacterial disease carrier                   | Infectious disorders carrier | Ancillary infectious topics | Infections and infestations |
| Diphtheria carrier                          | Infectious disorders carrier | Ancillary infectious topics | Infections and infestations |
| Direct infection transmission               | Infectious transmissions     | Ancillary infectious topics | Infections and infestations |
| Faecal-oral transmission of infection       | Infectious transmissions     | Ancillary infectious topics | Infections and infestations |
| HIV carrier                                 | Infectious disorders carrier | Ancillary infectious topics | Infections and infestations |
| Indirect infection transmission             | Infectious transmissions     | Ancillary infectious topics | Infections and infestations |
| Infection transmission via personal contact | Infectious transmissions     | Ancillary infectious topics | Infections and infestations |
| Infection via vaccinee                      | Infectious transmissions     | Ancillary infectious topics | Infections and infestations |
| Nosocomial infection                        | Infectious transmissions     | Ancillary infectious topics | Infections and infestations |
| Sexual transmission of infection            | Infectious transmissions     | Ancillary infectious topics | Infections and infestations |
| Sexually transmitted disease carrier        | Infectious disorders carrier | Ancillary infectious topics | Infections and infestations |
| Typhoid carrier                             | Infectious disorders carrier | Ancillary infectious topics | Infections and infestations |
| Vector-borne transmission of infection      | Infectious transmissions     | Ancillary infectious topics | Infections and infestations |
| Vertical infection transmission             | Infectious transmissions     | Ancillary infectious topics | Infections and infestations |
| Viral hepatitis carrier                     | Infectious disorders carrier | Ancillary infectious topics | Infections and infestations |
| Secondary transmission                      | Infectious transmissions     | Ancillary infectious topics | Infections and infestations |
| Primary transmission                        | Infectious transmissions     | Ancillary infectious topics | Infections and infestations |

|                                                           |                              |                             |                             |
|-----------------------------------------------------------|------------------------------|-----------------------------|-----------------------------|
| Human immunodeficiency virus transmission                 | Infectious transmissions     | Ancillary infectious topics | Infections and infestations |
| Infectious disease carrier                                | Infectious disorders carrier | Ancillary infectious topics | Infections and infestations |
| Iatrogenic infection                                      | Infectious transmissions     | Ancillary infectious topics | Infections and infestations |
| Community acquired infection                              | Infectious transmissions     | Ancillary infectious topics | Infections and infestations |
| HTLV-1 carrier                                            | Infectious disorders carrier | Ancillary infectious topics | Infections and infestations |
| Vaccine virus shedding                                    | Infectious transmissions     | Ancillary infectious topics | Infections and infestations |
| Transmission of an infectious agent via product           | Infectious transmissions     | Ancillary infectious topics | Infections and infestations |
| Suspected transmission of an infectious agent via product | Infectious transmissions     | Ancillary infectious topics | Infections and infestations |

#### 4.17 Rare adverse events

| Preferred term                    | High level term                                                     | High level group term                                      | System organ class                         |
|-----------------------------------|---------------------------------------------------------------------|------------------------------------------------------------|--------------------------------------------|
| 11-beta-hydroxylase deficiency    | Inborn errors of steroid synthesis                                  | Metabolic and nutritional disorders congenital             | Congenital, familial and genetic disorders |
| 17,20-desmolase deficiency        | Inborn errors of steroid synthesis                                  | Metabolic and nutritional disorders congenital             | Congenital, familial and genetic disorders |
| 17-alpha-hydroxylase deficiency   | Inborn errors of steroid synthesis                                  | Metabolic and nutritional disorders congenital             | Congenital, familial and genetic disorders |
| 20,22-desmolase deficiency        | Inborn errors of steroid synthesis                                  | Metabolic and nutritional disorders congenital             | Congenital, familial and genetic disorders |
| 21-hydroxylase deficiency         | Inborn errors of steroid synthesis                                  | Metabolic and nutritional disorders congenital             | Congenital, familial and genetic disorders |
| 5-alpha-reductase deficiency      | Inborn errors of steroid synthesis                                  | Metabolic and nutritional disorders congenital             | Congenital, familial and genetic disorders |
| Abdominal transposition           | Gastrointestinal tract disorders congenital NEC                     | Gastrointestinal tract disorders congenital                | Congenital, familial and genetic disorders |
| Abdominal wall anomaly            | Gastrointestinal tract disorders congenital NEC                     | Gastrointestinal tract disorders congenital                | Congenital, familial and genetic disorders |
| Abnormal palmar/plantar creases   | Skin and subcutaneous tissue disorders congenital NEC               | Skin and subcutaneous tissue disorders congenital          | Congenital, familial and genetic disorders |
| ABO haemolytic disease of newborn | Anaemias congenital (excl haemoglobinopathies)                      | Blood and lymphatic system disorders congenital            | Congenital, familial and genetic disorders |
| Accessory auricle                 | External ear disorders congenital                                   | Ear and labyrinthine disorders congenital                  | Congenital, familial and genetic disorders |
| Accessory carpal bone             | Musculoskeletal and connective tissue disorders of limbs congenital | Musculoskeletal and connective tissue disorders congenital | Congenital, familial and genetic disorders |
| Accessory muscle                  | Non-site specific muscle disorders congenital                       | Musculoskeletal and connective tissue                      | Congenital, familial and genetic           |



|                                 |                                                       |                                                   |                                            |
|---------------------------------|-------------------------------------------------------|---------------------------------------------------|--------------------------------------------|
|                                 |                                                       | disorders congenital                              | disorders                                  |
| Accessory salivary gland        | Salivary gland disorders congenital                   | Gastrointestinal tract disorders congenital       | Congenital, familial and genetic disorders |
| Acrodermatitis enteropathica    | Skin and subcutaneous tissue disorders congenital NEC | Skin and subcutaneous tissue disorders congenital | Congenital, familial and genetic disorders |
| Acute hepatic failure           | Hepatic failure and associated disorders              | Hepatic and hepatobiliary disorders               | Hepatobiliary disorders                    |
| Adrenal insufficiency neonatal  | Adrenal disorders congenital                          | Endocrine disorders congenital                    | Congenital, familial and genetic disorders |
| Aglossia                        | Tongue disorders congenital                           | Gastrointestinal tract disorders congenital       | Congenital, familial and genetic disorders |
| Agranulocytosis                 | Neutropenias                                          | White blood cell disorders                        | Blood and lymphatic system disorders       |
| Albinism                        | Inborn errors of amino acid metabolism                | Metabolic and nutritional disorders congenital    | Congenital, familial and genetic disorders |
| Alkaptonuria                    | Inborn errors of amino acid metabolism                | Metabolic and nutritional disorders congenital    | Congenital, familial and genetic disorders |
| Alpha-1 anti-trypsin deficiency | Inborn errors of metabolism NEC                       | Metabolic and nutritional disorders congenital    | Congenital, familial and genetic disorders |
| Alport's syndrome               | Renal disorders congenital                            | Renal and urinary tract disorders congenital      | Congenital, familial and genetic disorders |
| Amblyopia congenital            | Ocular disorders congenital NEC                       | Eye disorders congenital                          | Congenital, familial and genetic disorders |
| Aminoaciduria                   | Inborn errors of amino acid metabolism                | Metabolic and nutritional disorders congenital    | Congenital, familial and genetic disorders |
| Anal atresia                    | Anorectal disorders congenital                        | Gastrointestinal tract disorders congenital       | Congenital, familial and genetic disorders |
| Anencephaly                     | Cerebral disorders congenital                         | Neurological disorders congenital                 | Congenital, familial and genetic           |

|                              |                                                                     |                                                            |                                            |
|------------------------------|---------------------------------------------------------------------|------------------------------------------------------------|--------------------------------------------|
|                              |                                                                     |                                                            | disorders                                  |
| Aniridia                     | Iris and choroid disorders congenital                               | Eye disorders congenital                                   | Congenital, familial and genetic disorders |
| Anodontia                    | Dental disorders congenital                                         | Gastrointestinal tract disorders congenital                | Congenital, familial and genetic disorders |
| Anomaly of orbit, congenital | Ocular disorders congenital NEC                                     | Eye disorders congenital                                   | Congenital, familial and genetic disorders |
| Anophthalmos                 | Ocular disorders congenital NEC                                     | Eye disorders congenital                                   | Congenital, familial and genetic disorders |
| Anorchism                    | Male reproductive tract disorders congenital                        | Reproductive tract and breast disorders congenital         | Congenital, familial and genetic disorders |
| Anotia                       | External ear disorders congenital                                   | Ear and labyrinthine disorders congenital                  | Congenital, familial and genetic disorders |
| Antithrombin III deficiency  | Coagulation disorders congenital                                    | Blood and lymphatic system disorders congenital            | Congenital, familial and genetic disorders |
| Apert's syndrome             | Musculoskeletal and connective tissue disorders of skull congenital | Musculoskeletal and connective tissue disorders congenital | Congenital, familial and genetic disorders |
| Aphakia congenital           | Lens disorders congenital                                           | Eye disorders congenital                                   | Congenital, familial and genetic disorders |
| Aplasia                      | Congenital disorders NEC                                            | Congenital and hereditary disorders NEC                    | Congenital, familial and genetic disorders |
| Aplasia cutis congenita      | Skin and subcutaneous tissue disorders congenital NEC               | Skin and subcutaneous tissue disorders congenital          | Congenital, familial and genetic disorders |
| Aplastic anaemia             | Marrow depression and hypoplastic anaemias                          | Anaemias nonhaemolytic and marrow depression               | Blood and lymphatic system disorders       |
| Arnold-Chiari malformation   | Cerebellar disorders congenital                                     | Neurological disorders congenital                          | Congenital, familial and genetic disorders |

|                            |                                                                                  |                                                            |                                            |
|----------------------------|----------------------------------------------------------------------------------|------------------------------------------------------------|--------------------------------------------|
| Arteriovenous malformation | Vascular anomalies congenital NEC                                                | Cardiac and vascular disorders congenital                  | Congenital, familial and genetic disorders |
| Asterixis                  | Tremor (excl congenital)                                                         | Movement disorders (incl parkinsonism)                     | Nervous system disorders                   |
| Ataxia telangiectasia      | Immune system abnormalities congenital                                           | Immune system disorders congenital                         | Congenital, familial and genetic disorders |
| Atrial septal defect       | Cardiac septal defects congenital                                                | Cardiac and vascular disorders congenital                  | Congenital, familial and genetic disorders |
| Autoimmune hepatitis       | Hepatocellular damage and hepatitis NEC                                          | Hepatic and hepatobiliary disorders                        | Hepatobiliary disorders                    |
| Basophil count decreased   | White blood cell analyses                                                        | Haematology investigations (incl blood groups)             | Investigations                             |
| Benign familial pemphigus  | Skin and subcutaneous tissue disorders congenital NEC                            | Skin and subcutaneous tissue disorders congenital          | Congenital, familial and genetic disorders |
| Bicuspid aortic valve      | Cardiac valve disorders congenital                                               | Cardiac and vascular disorders congenital                  | Congenital, familial and genetic disorders |
| Birth mark                 | Skin and subcutaneous tissue disorders congenital NEC                            | Skin and subcutaneous tissue disorders congenital          | Congenital, familial and genetic disorders |
| Blindness congenital       | Ocular disorders congenital NEC                                                  | Eye disorders congenital                                   | Congenital, familial and genetic disorders |
| Branchial cleft sinus      | Musculoskeletal and connective tissue disorders of face, neck and jaw congenital | Musculoskeletal and connective tissue disorders congenital | Congenital, familial and genetic disorders |
| Breast malformation        | Breast disorders congenital                                                      | Reproductive tract and breast disorders congenital         | Congenital, familial and genetic disorders |
| Cardiac malposition        | Cardiac malpositions congenital                                                  | Cardiac and vascular disorders congenital                  | Congenital, familial and genetic disorders |
| Carpus curvus              | Musculoskeletal and connective tissue disorders of limbs congenital              | Musculoskeletal and connective tissue disorders congenital | Congenital, familial and genetic disorders |
| Cataract congenital        | Lens disorders congenital                                                        | Eye disorders congenital                                   | Congenital, familial and genetic           |

|                                       |                                                                                  |                                                            |                                            |
|---------------------------------------|----------------------------------------------------------------------------------|------------------------------------------------------------|--------------------------------------------|
|                                       |                                                                                  |                                                            | disorders                                  |
| Cerebellar hypoplasia                 | Cerebellar disorders congenital                                                  | Neurological disorders congenital                          | Congenital, familial and genetic disorders |
| Cerebral palsy                        | Cerebral disorders congenital                                                    | Neurological disorders congenital                          | Congenital, familial and genetic disorders |
| Cervical auricle                      | Musculoskeletal and connective tissue disorders of face, neck and jaw congenital | Musculoskeletal and connective tissue disorders congenital | Congenital, familial and genetic disorders |
| Cervical rib                          | Musculoskeletal and connective tissue disorders of trunk congenital (excl spine) | Musculoskeletal and connective tissue disorders congenital | Congenital, familial and genetic disorders |
| Chediak-Higashi syndrome              | Immune system abnormalities congenital                                           | Immune system disorders congenital                         | Congenital, familial and genetic disorders |
| Choanal atresia                       | Pharyngeal disorders congenital                                                  | Respiratory disorders congenital                           | Congenital, familial and genetic disorders |
| Chondrodystrophy                      | Non-site specific cartilage disorders congenital                                 | Musculoskeletal and connective tissue disorders congenital | Congenital, familial and genetic disorders |
| Chondroectodermal dysplasia           | Non-site specific cartilage disorders congenital                                 | Musculoskeletal and connective tissue disorders congenital | Congenital, familial and genetic disorders |
| Chordee                               | Male reproductive tract disorders congenital                                     | Reproductive tract and breast disorders congenital         | Congenital, familial and genetic disorders |
| Chorioretinal degeneration congenital | Retinal disorders congenital                                                     | Eye disorders congenital                                   | Congenital, familial and genetic disorders |
| Chronic granulomatous disease         | Immune system abnormalities congenital                                           | Immune system disorders congenital                         | Congenital, familial and genetic disorders |
| Chronic hepatitis                     | Hepatocellular damage and hepatitis NEC                                          | Hepatic and hepatobiliary disorders                        | Hepatobiliary disorders                    |
| Cleft lip                             | Musculoskeletal and connective tissue disorders of face, neck and jaw congenital | Musculoskeletal and connective tissue disorders congenital | Congenital, familial and genetic disorders |
| Cleft lip and palate                  | Palate disorders congenital                                                      | Gastrointestinal tract disorders congenital                | Congenital, familial and genetic           |

|                                      |                                                                     |                                                            |                                            |
|--------------------------------------|---------------------------------------------------------------------|------------------------------------------------------------|--------------------------------------------|
|                                      |                                                                     |                                                            | disorders                                  |
| Cleft palate                         | Palate disorders congenital                                         | Gastrointestinal tract disorders congenital                | Congenital, familial and genetic disorders |
| Clostridium difficile colitis        | Clostridia infections                                               | Bacterial infectious disorders                             | Infections and infestations                |
| Coarctation of the aorta             | Great vessel disorders congenital                                   | Cardiac and vascular disorders congenital                  | Congenital, familial and genetic disorders |
| Cockayne's syndrome                  | Neurological disorders congenital NEC                               | Neurological disorders congenital                          | Congenital, familial and genetic disorders |
| Collodion baby                       | Skin and subcutaneous tissue disorders congenital NEC               | Skin and subcutaneous tissue disorders congenital          | Congenital, familial and genetic disorders |
| Coloboma                             | Ocular disorders congenital NEC                                     | Eye disorders congenital                                   | Congenital, familial and genetic disorders |
| Colour blindness                     | Ocular disorders congenital NEC                                     | Eye disorders congenital                                   | Congenital, familial and genetic disorders |
| Coma hepatic                         | Coma states                                                         | Neurological disorders NEC                                 | Nervous system disorders                   |
| Combined immunodeficiency            | Immune system abnormalities congenital                              | Immune system disorders congenital                         | Congenital, familial and genetic disorders |
| Congenital absence of bile ducts     | Hepatobiliary abnormalities congenital                              | Hepatobiliary disorders congenital                         | Congenital, familial and genetic disorders |
| Congenital absence of cranial vault  | Musculoskeletal and connective tissue disorders of skull congenital | Musculoskeletal and connective tissue disorders congenital | Congenital, familial and genetic disorders |
| Congenital absence of vertebra       | Musculoskeletal and connective tissue disorders of spine congenital | Musculoskeletal and connective tissue disorders congenital | Congenital, familial and genetic disorders |
| Congenital anaemia                   | Anaemias congenital (excl haemoglobinopathies)                      | Blood and lymphatic system disorders congenital            | Congenital, familial and genetic disorders |
| Congenital anomalies of ear ossicles | Ear disorders congenital NEC                                        | Ear and labyrinthine disorders congenital                  | Congenital, familial and genetic disorders |

|                                           |                                                                                  |                                                            |                                            |
|-------------------------------------------|----------------------------------------------------------------------------------|------------------------------------------------------------|--------------------------------------------|
| Congenital anomaly                        | Congenital disorders NEC                                                         | Congenital and hereditary disorders NEC                    | Congenital, familial and genetic disorders |
| Congenital aortic atresia                 | Great vessel disorders congenital                                                | Cardiac and vascular disorders congenital                  | Congenital, familial and genetic disorders |
| Congenital aortic stenosis                | Great vessel disorders congenital                                                | Cardiac and vascular disorders congenital                  | Congenital, familial and genetic disorders |
| Congenital aortic valve incompetence      | Cardiac valve disorders congenital                                               | Cardiac and vascular disorders congenital                  | Congenital, familial and genetic disorders |
| Congenital aortic valve stenosis          | Cardiac valve disorders congenital                                               | Cardiac and vascular disorders congenital                  | Congenital, familial and genetic disorders |
| Congenital arteriovenous fistula          | Vascular anomalies congenital NEC                                                | Cardiac and vascular disorders congenital                  | Congenital, familial and genetic disorders |
| Congenital bladder diverticulum           | Bladder disorders congenital                                                     | Renal and urinary tract disorders congenital               | Congenital, familial and genetic disorders |
| Congenital bladder neck obstruction       | Bladder disorders congenital                                                     | Renal and urinary tract disorders congenital               | Congenital, familial and genetic disorders |
| Congenital brain damage                   | Cerebral disorders congenital                                                    | Neurological disorders congenital                          | Congenital, familial and genetic disorders |
| Congenital bronchiectasis                 | Pulmonary and bronchial disorders congenital                                     | Respiratory disorders congenital                           | Congenital, familial and genetic disorders |
| Congenital bronchomalacia                 | Pulmonary and bronchial disorders congenital                                     | Respiratory disorders congenital                           | Congenital, familial and genetic disorders |
| Congenital central nervous system anomaly | Central nervous system disorders congenital NEC                                  | Neurological disorders congenital                          | Congenital, familial and genetic disorders |
| Congenital clavicular agenesis            | Musculoskeletal and connective tissue disorders of trunk congenital (excl spine) | Musculoskeletal and connective tissue disorders congenital | Congenital, familial and genetic disorders |
| Congenital claw toe                       | Musculoskeletal and connective tissue disorders of limbs congenital              | Musculoskeletal and connective tissue disorders congenital | Congenital, familial and genetic disorders |

|                                        |                                                                                  |                                                            |                                            |
|----------------------------------------|----------------------------------------------------------------------------------|------------------------------------------------------------|--------------------------------------------|
| Congenital cleft hand                  | Musculoskeletal and connective tissue disorders of limbs congenital              | Musculoskeletal and connective tissue disorders congenital | Congenital, familial and genetic disorders |
| Congenital cystic lung                 | Pulmonary and bronchial disorders congenital                                     | Respiratory disorders congenital                           | Congenital, familial and genetic disorders |
| Congenital cytomegalovirus infection   | Viral infections congenital                                                      | Infections and infestations congenital                     | Congenital, familial and genetic disorders |
| Congenital deformity of clavicle       | Musculoskeletal and connective tissue disorders of trunk congenital (excl spine) | Musculoskeletal and connective tissue disorders congenital | Congenital, familial and genetic disorders |
| Congenital diaphragmatic eventration   | Diaphragmatic disorders congenital                                               | Respiratory disorders congenital                           | Congenital, familial and genetic disorders |
| Congenital diaphragmatic hernia        | Diaphragmatic disorders congenital                                               | Respiratory disorders congenital                           | Congenital, familial and genetic disorders |
| Congenital ectodermal dysplasia        | Skin and subcutaneous tissue disorders congenital NEC                            | Skin and subcutaneous tissue disorders congenital          | Congenital, familial and genetic disorders |
| Congenital ectopic bladder             | Bladder disorders congenital                                                     | Renal and urinary tract disorders congenital               | Congenital, familial and genetic disorders |
| Congenital elevation of scapula        | Musculoskeletal and connective tissue disorders of trunk congenital (excl spine) | Musculoskeletal and connective tissue disorders congenital | Congenital, familial and genetic disorders |
| Congenital emphysema                   | Pulmonary and bronchial disorders congenital                                     | Respiratory disorders congenital                           | Congenital, familial and genetic disorders |
| Congenital flaccid paralysis           | Neurological disorders congenital NEC                                            | Neurological disorders congenital                          | Congenital, familial and genetic disorders |
| Congenital flat feet                   | Musculoskeletal and connective tissue disorders of limbs congenital              | Musculoskeletal and connective tissue disorders congenital | Congenital, familial and genetic disorders |
| Congenital genital malformation female | Female reproductive tract disorders congenital                                   | Reproductive tract and breast disorders congenital         | Congenital, familial and genetic disorders |
| Congenital hearing disorder            | Hearing disorders congenital                                                     | Ear and labyrinthine disorders congenital                  | Congenital, familial and genetic disorders |

|                                     |                                                                                  |                                                            |                                            |
|-------------------------------------|----------------------------------------------------------------------------------|------------------------------------------------------------|--------------------------------------------|
| Congenital hepatitis B infection    | Viral infections congenital                                                      | Infections and infestations congenital                     | Congenital, familial and genetic disorders |
| Congenital hiatus hernia            | Gastric disorders congenital                                                     | Gastrointestinal tract disorders congenital                | Congenital, familial and genetic disorders |
| Congenital HIV infection            | Viral infections congenital                                                      | Infections and infestations congenital                     | Congenital, familial and genetic disorders |
| Congenital hydrocephalus            | Cerebral disorders congenital                                                    | Neurological disorders congenital                          | Congenital, familial and genetic disorders |
| Congenital hypertrichosis           | Hair and nail disorders congenital                                               | Skin and subcutaneous tissue disorders congenital          | Congenital, familial and genetic disorders |
| Congenital knee dislocation         | Musculoskeletal and connective tissue disorders of limbs congenital              | Musculoskeletal and connective tissue disorders congenital | Congenital, familial and genetic disorders |
| Congenital lacrimal gland anomaly   | Lacrimal system disorders congenital                                             | Eye disorders congenital                                   | Congenital, familial and genetic disorders |
| Congenital large intestinal atresia | Intestinal disorders congenital                                                  | Gastrointestinal tract disorders congenital                | Congenital, familial and genetic disorders |
| Congenital laryngeal stridor        | Laryngeal and tracheal disorders congenital                                      | Respiratory disorders congenital                           | Congenital, familial and genetic disorders |
| Congenital lip fistula              | Musculoskeletal and connective tissue disorders of face, neck and jaw congenital | Musculoskeletal and connective tissue disorders congenital | Congenital, familial and genetic disorders |
| Congenital lymphoedema              | Lymphatic system disorders congenital                                            | Blood and lymphatic system disorders congenital            | Congenital, familial and genetic disorders |
| Congenital malaria                  | Protozoal infections congenital                                                  | Infections and infestations congenital                     | Congenital, familial and genetic disorders |
| Congenital megacolon                | Intestinal disorders congenital                                                  | Gastrointestinal tract disorders congenital                | Congenital, familial and genetic disorders |
| Congenital megaureter               | Ureteric disorders congenital                                                    | Renal and urinary tract disorders congenital               | Congenital, familial and genetic disorders |



|                                      |                                                       |                                                            |                                            |
|--------------------------------------|-------------------------------------------------------|------------------------------------------------------------|--------------------------------------------|
| Congenital melanosis                 | Skin and subcutaneous tissue disorders congenital NEC | Skin and subcutaneous tissue disorders congenital          | Congenital, familial and genetic disorders |
| Congenital methaemoglobinaemia       | Haemoglobinopathies congenital                        | Blood and lymphatic system disorders congenital            | Congenital, familial and genetic disorders |
| Congenital mitral valve incompetence | Cardiac valve disorders congenital                    | Cardiac and vascular disorders congenital                  | Congenital, familial and genetic disorders |
| Congenital mitral valve stenosis     | Cardiac valve disorders congenital                    | Cardiac and vascular disorders congenital                  | Congenital, familial and genetic disorders |
| Congenital muscle absence            | Non-site specific muscle disorders congenital         | Musculoskeletal and connective tissue disorders congenital | Congenital, familial and genetic disorders |
| Congenital nail disorder             | Hair and nail disorders congenital                    | Skin and subcutaneous tissue disorders congenital          | Congenital, familial and genetic disorders |
| Congenital neurological degeneration | Neurological disorders congenital NEC                 | Neurological disorders congenital                          | Congenital, familial and genetic disorders |
| Congenital night blindness           | Retinal disorders congenital                          | Eye disorders congenital                                   | Congenital, familial and genetic disorders |
| Congenital nystagmus                 | Neurological disorders congenital NEC                 | Neurological disorders congenital                          | Congenital, familial and genetic disorders |
| Congenital oesophageal stenosis      | Oesophageal disorders congenital                      | Gastrointestinal tract disorders congenital                | Congenital, familial and genetic disorders |
| Congenital oesophageal web           | Oesophageal disorders congenital                      | Gastrointestinal tract disorders congenital                | Congenital, familial and genetic disorders |
| Congenital osteodystrophy            | Non-site specific bone disorders congenital           | Musculoskeletal and connective tissue disorders congenital | Congenital, familial and genetic disorders |
| Congenital perforated nasal septum   | Nasal disorders congenital                            | Respiratory disorders congenital                           | Congenital, familial and genetic disorders |
| Congenital pigmentation disorder     | Skin and subcutaneous tissue disorders congenital NEC | Skin and subcutaneous tissue disorders congenital          | Congenital, familial and genetic disorders |

|                                     |                                                                     |                                                            |                                            |
|-------------------------------------|---------------------------------------------------------------------|------------------------------------------------------------|--------------------------------------------|
| Congenital pneumonia                | Pulmonary and bronchial disorders congenital                        | Respiratory disorders congenital                           | Congenital, familial and genetic disorders |
| Congenital rubella infection        | Viral infections congenital                                         | Infections and infestations congenital                     | Congenital, familial and genetic disorders |
| Congenital salivary gland anomaly   | Salivary gland disorders congenital                                 | Gastrointestinal tract disorders congenital                | Congenital, familial and genetic disorders |
| Congenital small intestinal atresia | Intestinal disorders congenital                                     | Gastrointestinal tract disorders congenital                | Congenital, familial and genetic disorders |
| Congenital spinal fusion            | Musculoskeletal and connective tissue disorders of spine congenital | Musculoskeletal and connective tissue disorders congenital | Congenital, familial and genetic disorders |
| Congenital spondylolisthesis        | Musculoskeletal and connective tissue disorders of spine congenital | Musculoskeletal and connective tissue disorders congenital | Congenital, familial and genetic disorders |
| Congenital spondylolysis            | Musculoskeletal and connective tissue disorders of spine congenital | Musculoskeletal and connective tissue disorders congenital | Congenital, familial and genetic disorders |
| Congenital syphilis                 | Bacterial infections congenital                                     | Infections and infestations congenital                     | Congenital, familial and genetic disorders |
| Congenital syphilitic encephalitis  | Bacterial infections congenital                                     | Infections and infestations congenital                     | Congenital, familial and genetic disorders |
| Congenital syphilitic meningitis    | Bacterial infections congenital                                     | Infections and infestations congenital                     | Congenital, familial and genetic disorders |
| Congenital torticollis              | Musculoskeletal and connective tissue disorders of spine congenital | Musculoskeletal and connective tissue disorders congenital | Congenital, familial and genetic disorders |
| Congenital toxoplasmosis            | Protozoal infections congenital                                     | Infections and infestations congenital                     | Congenital, familial and genetic disorders |
| Congenital tracheomalacia           | Laryngeal and tracheal disorders congenital                         | Respiratory disorders congenital                           | Congenital, familial and genetic disorders |
| Congenital tricuspid valve stenosis | Cardiac valve disorders congenital                                  | Cardiac and vascular disorders congenital                  | Congenital, familial and genetic disorders |

|                                          |                                                                     |                                                            |                                            |
|------------------------------------------|---------------------------------------------------------------------|------------------------------------------------------------|--------------------------------------------|
| Congenital tuberculosis                  | Mycobacterial infections congenital                                 | Infections and infestations congenital                     | Congenital, familial and genetic disorders |
| Congenital umbilical hernia              | Gastrointestinal tract disorders congenital NEC                     | Gastrointestinal tract disorders congenital                | Congenital, familial and genetic disorders |
| Congenital urinary tract obstruction     | Renal and urinary tract disorders congenital NEC                    | Renal and urinary tract disorders congenital               | Congenital, familial and genetic disorders |
| Congenital varicella infection           | Viral infections congenital                                         | Infections and infestations congenital                     | Congenital, familial and genetic disorders |
| Congenital vas deferens absence          | Male reproductive tract disorders congenital                        | Reproductive tract and breast disorders congenital         | Congenital, familial and genetic disorders |
| Congenital vesicoureteric reflux         | Bladder disorders congenital                                        | Renal and urinary tract disorders congenital               | Congenital, familial and genetic disorders |
| Conjoined twins                          | Congenital disorders NEC                                            | Congenital and hereditary disorders NEC                    | Congenital, familial and genetic disorders |
| Conjunctivitis gonococcal neonatal       | Bacterial infections congenital                                     | Infections and infestations congenital                     | Congenital, familial and genetic disorders |
| Cor biloculare                           | Cardiac disorders congenital NEC                                    | Cardiac and vascular disorders congenital                  | Congenital, familial and genetic disorders |
| Cor triatriatum                          | Cardiac disorders congenital NEC                                    | Cardiac and vascular disorders congenital                  | Congenital, familial and genetic disorders |
| Corneal dystrophy                        | Corneal and scleral disorders congenital                            | Eye disorders congenital                                   | Congenital, familial and genetic disorders |
| Corneal opacity congenital               | Corneal and scleral disorders congenital                            | Eye disorders congenital                                   | Congenital, familial and genetic disorders |
| Corrected transposition of great vessels | Great vessel disorders congenital                                   | Cardiac and vascular disorders congenital                  | Congenital, familial and genetic disorders |
| Craniorachischisis                       | Musculoskeletal and connective tissue disorders of skull congenital | Musculoskeletal and connective tissue disorders congenital | Congenital, familial and genetic disorders |

|                            |                                                                                  |                                                            |                                            |
|----------------------------|----------------------------------------------------------------------------------|------------------------------------------------------------|--------------------------------------------|
| Cri du Chat syndrome       | Autosomal chromosomal abnormalities                                              | Chromosomal abnormalities and abnormal gene carriers       | Congenital, familial and genetic disorders |
| Crigler-Najjar syndrome    | Inborn errors of bilirubin metabolism                                            | Metabolic and nutritional disorders congenital             | Congenital, familial and genetic disorders |
| Cryptophthalmos            | Ocular disorders congenital NEC                                                  | Eye disorders congenital                                   | Congenital, familial and genetic disorders |
| Cryptorchism               | Male reproductive tract disorders congenital                                     | Reproductive tract and breast disorders congenital         | Congenital, familial and genetic disorders |
| Cystic fibrosis            | Pulmonary and bronchial disorders congenital                                     | Respiratory disorders congenital                           | Congenital, familial and genetic disorders |
| Cystic fibrosis lung       | Pulmonary and bronchial disorders congenital                                     | Respiratory disorders congenital                           | Congenital, familial and genetic disorders |
| Cystic fibrosis pancreatic | Pancreatic disorders congenital                                                  | Gastrointestinal tract disorders congenital                | Congenital, familial and genetic disorders |
| Cystinosis                 | Inborn errors of amino acid metabolism                                           | Metabolic and nutritional disorders congenital             | Congenital, familial and genetic disorders |
| Cystinuria                 | Inborn errors of amino acid metabolism                                           | Metabolic and nutritional disorders congenital             | Congenital, familial and genetic disorders |
| Dacryostenosis congenital  | Lacrimal system disorders congenital                                             | Eye disorders congenital                                   | Congenital, familial and genetic disorders |
| Deaf mutism                | Hearing disorders congenital                                                     | Ear and labyrinthine disorders congenital                  | Congenital, familial and genetic disorders |
| Deafness congenital        | Hearing disorders congenital                                                     | Ear and labyrinthine disorders congenital                  | Congenital, familial and genetic disorders |
| Delta-beta thalassaemia    | Haemoglobinopathies congenital                                                   | Blood and lymphatic system disorders congenital            | Congenital, familial and genetic disorders |
| Dentofacial anomaly        | Musculoskeletal and connective tissue disorders of face, neck and jaw congenital | Musculoskeletal and connective tissue disorders congenital | Congenital, familial and genetic disorders |

|                                              |                                                     |                                                 |                                            |
|----------------------------------------------|-----------------------------------------------------|-------------------------------------------------|--------------------------------------------|
| Developmental glaucoma                       | Anterior and posterior chamber disorders congenital | Eye disorders congenital                        | Congenital, familial and genetic disorders |
| Dextrocardia                                 | Cardiac malpositions congenital                     | Cardiac and vascular disorders congenital       | Congenital, familial and genetic disorders |
| Diaphragmatic aplasia                        | Diaphragmatic disorders congenital                  | Respiratory disorders congenital                | Congenital, familial and genetic disorders |
| Diastematomyelia                             | Central nervous system disorders congenital NEC     | Neurological disorders congenital               | Congenital, familial and genetic disorders |
| Diencephalic syndrome of infancy             | Central nervous system disorders congenital NEC     | Neurological disorders congenital               | Congenital, familial and genetic disorders |
| Diethylstilboestrol syndrome                 | Chemically-induced congenital syndromes             | Congenital and hereditary disorders NEC         | Congenital, familial and genetic disorders |
| Differential white blood cell count abnormal | White blood cell analyses                           | Haematology investigations (incl blood groups)  | Investigations                             |
| DiGeorge's syndrome                          | Immune system abnormalities congenital              | Immune system disorders congenital              | Congenital, familial and genetic disorders |
| Dilatation intrahepatic duct congenital      | Hepatobiliary abnormalities congenital              | Hepatobiliary disorders congenital              | Congenital, familial and genetic disorders |
| Diverticulitis Meckel's                      | Gastrointestinal tract disorders congenital NEC     | Gastrointestinal tract disorders congenital     | Congenital, familial and genetic disorders |
| Diverticulum of pharynx, congenital          | Pharyngeal disorders congenital                     | Respiratory disorders congenital                | Congenital, familial and genetic disorders |
| Double heterozygous sickling disorders       | Haemoglobinopathies congenital                      | Blood and lymphatic system disorders congenital | Congenital, familial and genetic disorders |
| Double outlet right ventricle                | Great vessel disorders congenital                   | Cardiac and vascular disorders congenital       | Congenital, familial and genetic disorders |
| Double ureter                                | Ureteric disorders congenital                       | Renal and urinary tract disorders congenital    | Congenital, familial and genetic disorders |

|                                   |                                                 |                                                            |                                            |
|-----------------------------------|-------------------------------------------------|------------------------------------------------------------|--------------------------------------------|
| Duane's syndrome                  | Ocular disorders congenital NEC                 | Eye disorders congenital                                   | Congenital, familial and genetic disorders |
| Dubin-Johnson syndrome            | Inborn errors of bilirubin metabolism           | Metabolic and nutritional disorders congenital             | Congenital, familial and genetic disorders |
| Duchenne muscular dystrophy       | Non-site specific muscle disorders congenital   | Musculoskeletal and connective tissue disorders congenital | Congenital, familial and genetic disorders |
| Ductus arteriosus stenosis foetal | Arterial disorders congenital                   | Cardiac and vascular disorders congenital                  | Congenital, familial and genetic disorders |
| Duodenal atresia                  | Intestinal disorders congenital                 | Gastrointestinal tract disorders congenital                | Congenital, familial and genetic disorders |
| Ear malformation                  | Ear disorders congenital NEC                    | Ear and labyrinthine disorders congenital                  | Congenital, familial and genetic disorders |
| Ebstein's anomaly                 | Cardiac valve disorders congenital              | Cardiac and vascular disorders congenital                  | Congenital, familial and genetic disorders |
| Ectopia cordis                    | Cardiac malpositions congenital                 | Cardiac and vascular disorders congenital                  | Congenital, familial and genetic disorders |
| Ectopic ureter                    | Ureteric disorders congenital                   | Renal and urinary tract disorders congenital               | Congenital, familial and genetic disorders |
| Ehlers-Danlos syndrome            | Connective tissue disorders congenital          | Musculoskeletal and connective tissue disorders congenital | Congenital, familial and genetic disorders |
| Elliptocytosis hereditary         | Haematological disorders congenital NEC         | Blood and lymphatic system disorders congenital            | Congenital, familial and genetic disorders |
| Encephalocele                     | Central nervous system disorders congenital NEC | Neurological disorders congenital                          | Congenital, familial and genetic disorders |
| Entropion congenital              | Eyelid disorders congenital                     | Eye disorders congenital                                   | Congenital, familial and genetic disorders |
| Eosinopenia                       | Leukopenias NEC                                 | White blood cell disorders                                 | Blood and lymphatic system disorders       |

|                            |                                                         |                                                    |                                            |
|----------------------------|---------------------------------------------------------|----------------------------------------------------|--------------------------------------------|
| Eosinophil count decreased | White blood cell analyses                               | Haematology investigations (incl blood groups)     | Investigations                             |
| Epidermal naevus           | Skin and subcutaneous tissue disorders congenital NEC   | Skin and subcutaneous tissue disorders congenital  | Congenital, familial and genetic disorders |
| Epilepsy congenital        | Neurological disorders congenital NEC                   | Neurological disorders congenital                  | Congenital, familial and genetic disorders |
| Epispadias                 | Male reproductive tract disorders congenital            | Reproductive tract and breast disorders congenital | Congenital, familial and genetic disorders |
| Erythroblastosis foetalis  | Anaemias congenital (excl haemoglobinopathies)          | Blood and lymphatic system disorders congenital    | Congenital, familial and genetic disorders |
| Essential fructosuria      | Inborn errors of carbohydrate metabolism (excl glucose) | Metabolic and nutritional disorders congenital     | Congenital, familial and genetic disorders |
| Exomphalos                 | Gastrointestinal tract disorders congenital NEC         | Gastrointestinal tract disorders congenital        | Congenital, familial and genetic disorders |
| Eyelid ptosis congenital   | Eyelid disorders congenital                             | Eye disorders congenital                           | Congenital, familial and genetic disorders |
| Fabry's disease            | Lysosomal storage disorders                             | Metabolic and nutritional disorders congenital     | Congenital, familial and genetic disorders |
| Factor I deficiency        | Coagulation disorders congenital                        | Blood and lymphatic system disorders congenital    | Congenital, familial and genetic disorders |
| Factor II deficiency       | Coagulation disorders congenital                        | Blood and lymphatic system disorders congenital    | Congenital, familial and genetic disorders |
| Factor IX deficiency       | Coagulation disorders congenital                        | Blood and lymphatic system disorders congenital    | Congenital, familial and genetic disorders |
| Factor VII deficiency      | Coagulation disorders congenital                        | Blood and lymphatic system disorders congenital    | Congenital, familial and genetic disorders |
| Factor VIII deficiency     | Coagulation disorders congenital                        | Blood and lymphatic system disorders congenital    | Congenital, familial and genetic disorders |

|                               |                                               |                                                            |                                            |
|-------------------------------|-----------------------------------------------|------------------------------------------------------------|--------------------------------------------|
| Factor XI deficiency          | Coagulation disorders congenital              | Blood and lymphatic system disorders congenital            | Congenital, familial and genetic disorders |
| Falot's tetralogy             | Multiple cardiac abnormalities congenital     | Cardiac and vascular disorders congenital                  | Congenital, familial and genetic disorders |
| Familial amyloidosis          | Congenital disorders NEC                      | Congenital and hereditary disorders NEC                    | Congenital, familial and genetic disorders |
| Familial mediterranean fever  | Immune system abnormalities congenital        | Immune system disorders congenital                         | Congenital, familial and genetic disorders |
| Familial periodic paralysis   | Neurological disorders congenital NEC         | Neurological disorders congenital                          | Congenital, familial and genetic disorders |
| Familial polycythaemia        | Haematological disorders congenital NEC       | Blood and lymphatic system disorders congenital            | Congenital, familial and genetic disorders |
| Familial tremor               | Non-site specific muscle disorders congenital | Musculoskeletal and connective tissue disorders congenital | Congenital, familial and genetic disorders |
| Fanconi syndrome              | Renal disorders congenital                    | Renal and urinary tract disorders congenital               | Congenital, familial and genetic disorders |
| Febrile neutropenia           | Neutropenias                                  | White blood cell disorders                                 | Blood and lymphatic system disorders       |
| Fibrous dysplasia of bone     | Non-site specific bone disorders congenital   | Musculoskeletal and connective tissue disorders congenital | Congenital, familial and genetic disorders |
| Fissure of tongue, congenital | Tongue disorders congenital                   | Gastrointestinal tract disorders congenital                | Congenital, familial and genetic disorders |
| Foetal alcohol syndrome       | Chemically-induced congenital syndromes       | Congenital and hereditary disorders NEC                    | Congenital, familial and genetic disorders |
| Fragile X syndrome            | Sex chromosomal abnormalities                 | Chromosomal abnormalities and abnormal gene carriers       | Congenital, familial and genetic disorders |
| Friedreich's ataxia           | Cerebellar disorders congenital               | Neurological disorders congenital                          | Congenital, familial and genetic disorders |



|                                              |                                                         |                                                    |                                            |
|----------------------------------------------|---------------------------------------------------------|----------------------------------------------------|--------------------------------------------|
| Full blood count abnormal                    | Blood counts NEC                                        | Haematology investigations (incl blood groups)     | Investigations                             |
| Full blood count decreased                   | Blood counts NEC                                        | Haematology investigations (incl blood groups)     | Investigations                             |
| Galactosaemia                                | Inborn errors of carbohydrate metabolism (excl glucose) | Metabolic and nutritional disorders congenital     | Congenital, familial and genetic disorders |
| Gastroenteritis clostridial                  | Clostridia infections                                   | Bacterial infectious disorders                     | Infections and infestations                |
| Gastrointestinal arteriovenous malformation  | Vascular anomalies congenital NEC                       | Cardiac and vascular disorders congenital          | Congenital, familial and genetic disorders |
| Gastroschisis                                | Gastrointestinal tract disorders congenital NEC         | Gastrointestinal tract disorders congenital        | Congenital, familial and genetic disorders |
| Gaucher's disease                            | Lysosomal storage disorders                             | Metabolic and nutritional disorders congenital     | Congenital, familial and genetic disorders |
| Genitalia external ambiguous                 | Reproductive tract disorders congenital NEC             | Reproductive tract and breast disorders congenital | Congenital, familial and genetic disorders |
| Gilbert's syndrome                           | Inborn errors of bilirubin metabolism                   | Metabolic and nutritional disorders congenital     | Congenital, familial and genetic disorders |
| Glomerulonephritis                           | Glomerulonephritis and nephrotic syndrome               | Nephropathies                                      | Renal and urinary disorders                |
| Glomerulonephritis acute                     | Glomerulonephritis and nephrotic syndrome               | Nephropathies                                      | Renal and urinary disorders                |
| Glomerulonephritis chronic                   | Glomerulonephritis and nephrotic syndrome               | Nephropathies                                      | Renal and urinary disorders                |
| Glomerulonephritis minimal lesion            | Glomerulonephritis and nephrotic syndrome               | Nephropathies                                      | Renal and urinary disorders                |
| Glomerulonephritis rapidly progressive       | Glomerulonephritis and nephrotic syndrome               | Nephropathies                                      | Renal and urinary disorders                |
| Glucose-6-phosphate dehydrogenase deficiency | Inborn errors of carbohydrate metabolism (excl glucose) | Metabolic and nutritional disorders congenital     | Congenital, familial and genetic disorders |
| Glycogen storage disease type V              | Inborn errors of carbohydrate metabolism (excl glucose) | Metabolic and nutritional disorders congenital     | Congenital, familial and genetic disorders |

|                                 |                                                                     |                                                            |                                            |
|---------------------------------|---------------------------------------------------------------------|------------------------------------------------------------|--------------------------------------------|
| Glycogen storage disease type I | Inborn errors of carbohydrate metabolism (excl glucose)             | Metabolic and nutritional disorders congenital             | Congenital, familial and genetic disorders |
| Gonadal dysgenesis              | Sex chromosomal abnormalities                                       | Chromosomal abnormalities and abnormal gene carriers       | Congenital, familial and genetic disorders |
| Granulocyte count decreased     | White blood cell analyses                                           | Haematology investigations (incl blood groups)             | Investigations                             |
| Granulocytes abnormal           | White blood cell analyses                                           | Haematology investigations (incl blood groups)             | Investigations                             |
| Granulocytopenia                | Neutropenias                                                        | White blood cell disorders                                 | Blood and lymphatic system disorders       |
| Granulocytopenia neonatal       | Neutropenias                                                        | White blood cell disorders                                 | Blood and lymphatic system disorders       |
| Granulomatous liver disease     | Hepatocellular damage and hepatitis NEC                             | Hepatic and hepatobiliary disorders                        | Hepatobiliary disorders                    |
| Haemoglobin C disease           | Haemoglobinopathies congenital                                      | Blood and lymphatic system disorders congenital            | Congenital, familial and genetic disorders |
| Hamartoma vascular              | Vascular anomalies congenital NEC                                   | Cardiac and vascular disorders congenital                  | Congenital, familial and genetic disorders |
| Harlequin foetus                | Skin and subcutaneous tissue disorders congenital NEC               | Skin and subcutaneous tissue disorders congenital          | Congenital, familial and genetic disorders |
| Hartnup disease                 | Inborn errors of amino acid metabolism                              | Metabolic and nutritional disorders congenital             | Congenital, familial and genetic disorders |
| Heart disease congenital        | Cardiac disorders congenital NEC                                    | Cardiac and vascular disorders congenital                  | Congenital, familial and genetic disorders |
| Hemihypertrophy                 | Congenital disorders NEC                                            | Congenital and hereditary disorders NEC                    | Congenital, familial and genetic disorders |
| Hemivertebra                    | Musculoskeletal and connective tissue disorders of spine congenital | Musculoskeletal and connective tissue disorders congenital | Congenital, familial and genetic disorders |

|                                    |                                                 |                                           |                                            |
|------------------------------------|-------------------------------------------------|-------------------------------------------|--------------------------------------------|
| Hepatic arteriovenous malformation | Vascular anomalies congenital NEC               | Cardiac and vascular disorders congenital | Congenital, familial and genetic disorders |
| Hepatic atrophy                    | Hepatic and hepatobiliary disorders NEC         | Hepatic and hepatobiliary disorders       | Hepatobiliary disorders                    |
| Hepatic cirrhosis                  | Hepatic fibrosis and cirrhosis                  | Hepatic and hepatobiliary disorders       | Hepatobiliary disorders                    |
| Hepatic encephalopathy             | Encephalopathies toxic and metabolic            | Encephalopathies                          | Nervous system disorders                   |
| Hepatic failure                    | Hepatic failure and associated disorders        | Hepatic and hepatobiliary disorders       | Hepatobiliary disorders                    |
| Hepatic fibrosis                   | Hepatic fibrosis and cirrhosis                  | Hepatic and hepatobiliary disorders       | Hepatobiliary disorders                    |
| Hepatic necrosis                   | Hepatocellular damage and hepatitis NEC         | Hepatic and hepatobiliary disorders       | Hepatobiliary disorders                    |
| Hepatic steatosis                  | Hepatocellular damage and hepatitis NEC         | Hepatic and hepatobiliary disorders       | Hepatobiliary disorders                    |
| Hepatitis                          | Hepatocellular damage and hepatitis NEC         | Hepatic and hepatobiliary disorders       | Hepatobiliary disorders                    |
| Hepatitis acute                    | Hepatocellular damage and hepatitis NEC         | Hepatic and hepatobiliary disorders       | Hepatobiliary disorders                    |
| Hepatitis chronic active           | Hepatocellular damage and hepatitis NEC         | Hepatic and hepatobiliary disorders       | Hepatobiliary disorders                    |
| Hepatitis chronic persistent       | Hepatocellular damage and hepatitis NEC         | Hepatic and hepatobiliary disorders       | Hepatobiliary disorders                    |
| Hepatitis fulminant                | Hepatocellular damage and hepatitis NEC         | Hepatic and hepatobiliary disorders       | Hepatobiliary disorders                    |
| Hepatitis toxic                    | Hepatocellular damage and hepatitis NEC         | Hepatic and hepatobiliary disorders       | Hepatobiliary disorders                    |
| Hepato-lenticular degeneration     | Central nervous system disorders congenital NEC | Neurological disorders congenital         | Congenital, familial and genetic disorders |
| Hepatocellular injury              | Hepatocellular damage and hepatitis NEC         | Hepatic and hepatobiliary disorders       | Hepatobiliary disorders                    |
| Hepatorenal syndrome               | Hepatic failure and associated disorders        | Hepatic and hepatobiliary disorders       | Hepatobiliary disorders                    |
| Hepatotoxicity                     | Hepatocellular damage and hepatitis NEC         | Hepatic and hepatobiliary disorders       | Hepatobiliary disorders                    |
| Hereditary choroidal dystrophy     | Iris and choroid disorders congenital           | Eye disorders congenital                  | Congenital, familial and genetic disorders |

|                                        |                                                         |                                                    |                                            |
|----------------------------------------|---------------------------------------------------------|----------------------------------------------------|--------------------------------------------|
| Hereditary fructose intolerance        | Inborn errors of carbohydrate metabolism (excl glucose) | Metabolic and nutritional disorders congenital     | Congenital, familial and genetic disorders |
| Hereditary haemorrhagic telangiectasia | Skin and subcutaneous tissue disorders congenital NEC   | Skin and subcutaneous tissue disorders congenital  | Congenital, familial and genetic disorders |
| Hereditary neuropathic amyloidosis     | Congenital disorders NEC                                | Congenital and hereditary disorders NEC            | Congenital, familial and genetic disorders |
| Hereditary optic atrophy               | Genetic mitochondrial abnormalities NEC                 | Cytoplasmic disorders congenital                   | Congenital, familial and genetic disorders |
| Hereditary retinal dystrophy           | Retinal disorders congenital                            | Eye disorders congenital                           | Congenital, familial and genetic disorders |
| Hereditary sideroblastic anaemia       | Anaemias congenital (excl haemoglobinopathies)          | Blood and lymphatic system disorders congenital    | Congenital, familial and genetic disorders |
| Hereditary spastic paraplegia          | Neurological disorders congenital NEC                   | Neurological disorders congenital                  | Congenital, familial and genetic disorders |
| Hereditary spherocytosis               | Haematological disorders congenital NEC                 | Blood and lymphatic system disorders congenital    | Congenital, familial and genetic disorders |
| Hermaphroditism                        | Reproductive tract disorders congenital NEC             | Reproductive tract and breast disorders congenital | Congenital, familial and genetic disorders |
| Hernia congenital                      | Gastrointestinal tract disorders congenital NEC         | Gastrointestinal tract disorders congenital        | Congenital, familial and genetic disorders |
| Congenital herpes simplex infection    | Viral infections congenital                             | Infections and infestations congenital             | Congenital, familial and genetic disorders |
| Hexokinase deficiency anaemia          | Anaemias congenital (excl haemoglobinopathies)          | Blood and lymphatic system disorders congenital    | Congenital, familial and genetic disorders |
| High arched palate                     | Palate disorders congenital                             | Gastrointestinal tract disorders congenital        | Congenital, familial and genetic disorders |
| Homocystinuria                         | Inborn errors of amino acid metabolism                  | Metabolic and nutritional disorders congenital     | Congenital, familial and genetic disorders |

|                                 |                                                                                  |                                                            |                                                      |
|---------------------------------|----------------------------------------------------------------------------------|------------------------------------------------------------|------------------------------------------------------|
| Hydrocele                       | Male reproductive tract disorders congenital                                     | Reproductive tract and breast disorders congenital         | Congenital, familial and genetic disorders           |
| Hydronephrosis                  | Renal obstructive disorders                                                      | Renal disorders (excl nephropathies)                       | Renal and urinary disorders                          |
| Hydroureter                     | Ureteric disorders NEC                                                           | Ureteric disorders                                         | Renal and urinary disorders                          |
| Hypertelorism of orbit          | Musculoskeletal and connective tissue disorders of face, neck and jaw congenital | Musculoskeletal and connective tissue disorders congenital | Congenital, familial and genetic disorders           |
| Hyperthermia malignant          | Body temperature altered                                                         | Body temperature conditions                                | General disorders and administration site conditions |
| Hypochondroplasia               | Musculoskeletal and connective tissue disorders of limbs congenital              | Musculoskeletal and connective tissue disorders congenital | Congenital, familial and genetic disorders           |
| Hypopituitarism foetal          | Endocrine disorders congenital NEC                                               | Endocrine disorders congenital                             | Congenital, familial and genetic disorders           |
| Hypoplastic left heart syndrome | Cardiac hypoplasias congenital                                                   | Cardiac and vascular disorders congenital                  | Congenital, familial and genetic disorders           |
| Hypospadias                     | Male reproductive tract disorders congenital                                     | Reproductive tract and breast disorders congenital         | Congenital, familial and genetic disorders           |
| Ichthyosis                      | Skin and subcutaneous tissue disorders congenital NEC                            | Skin and subcutaneous tissue disorders congenital          | Congenital, familial and genetic disorders           |
| Icterus index increased         | Liver function analyses                                                          | Hepatobiliary investigations                               | Investigations                                       |
| Ileal atresia                   | Intestinal disorders congenital                                                  | Gastrointestinal tract disorders congenital                | Congenital, familial and genetic disorders           |
| Immunodeficiency congenital     | Immune system abnormalities congenital                                           | Immune system disorders congenital                         | Congenital, familial and genetic disorders           |
| Imperforate hymen               | Female reproductive tract disorders congenital                                   | Reproductive tract and breast disorders congenital         | Congenital, familial and genetic disorders           |
| Imperforate oesophagus          | Oesophageal disorders congenital                                                 | Gastrointestinal tract disorders congenital                | Congenital, familial and genetic disorders           |

|                              |                                                                     |                                                            |                                            |
|------------------------------|---------------------------------------------------------------------|------------------------------------------------------------|--------------------------------------------|
| Iniencephaly                 | Musculoskeletal and connective tissue disorders of skull congenital | Musculoskeletal and connective tissue disorders congenital | Congenital, familial and genetic disorders |
| Interruption of aortic arch  | Great vessel disorders congenital                                   | Cardiac and vascular disorders congenital                  | Congenital, familial and genetic disorders |
| Intestinal transposition     | Intestinal disorders congenital                                     | Gastrointestinal tract disorders congenital                | Congenital, familial and genetic disorders |
| Ischaemic hepatitis          | Hepatocellular damage and hepatitis NEC                             | Hepatic and hepatobiliary disorders                        | Hepatobiliary disorders                    |
| Jaundice hepatocellular      | Cholestasis and jaundice                                            | Hepatic and hepatobiliary disorders                        | Hepatobiliary disorders                    |
| Keratosis follicular         | Skin and subcutaneous tissue disorders congenital NEC               | Skin and subcutaneous tissue disorders congenital          | Congenital, familial and genetic disorders |
| Kidney duplex                | Renal disorders congenital                                          | Renal and urinary tract disorders congenital               | Congenital, familial and genetic disorders |
| Kidney malformation          | Renal disorders congenital                                          | Renal and urinary tract disorders congenital               | Congenital, familial and genetic disorders |
| Klinefelter's syndrome       | Sex chromosomal abnormalities                                       | Chromosomal abnormalities and abnormal gene carriers       | Congenital, familial and genetic disorders |
| Klippel-Feil syndrome        | Musculoskeletal and connective tissue disorders of spine congenital | Musculoskeletal and connective tissue disorders congenital | Congenital, familial and genetic disorders |
| Krabbe's disease             | Lysosomal storage disorders                                         | Metabolic and nutritional disorders congenital             | Congenital, familial and genetic disorders |
| Lacrimal punctum agenesis    | Lacrimal system disorders congenital                                | Eye disorders congenital                                   | Congenital, familial and genetic disorders |
| Laryngeal web                | Laryngeal and tracheal disorders congenital                         | Respiratory disorders congenital                           | Congenital, familial and genetic disorders |
| Laryngocele                  | Laryngeal and tracheal disorders congenital                         | Respiratory disorders congenital                           | Congenital, familial and genetic disorders |
| Lens abnormality, congenital | Lens disorders congenital                                           | Eye disorders congenital                                   | Congenital, familial and genetic           |

|                           |                                                                                  |                                                            |                                            |
|---------------------------|----------------------------------------------------------------------------------|------------------------------------------------------------|--------------------------------------------|
|                           |                                                                                  |                                                            | disorders                                  |
| Leukodystrophy            | Lysosomal storage disorders                                                      | Metabolic and nutritional disorders congenital             | Congenital, familial and genetic disorders |
| Lichen spinulosus         | Skin and subcutaneous tissue disorders congenital NEC                            | Skin and subcutaneous tissue disorders congenital          | Congenital, familial and genetic disorders |
| Limb malformation         | Musculoskeletal and connective tissue disorders of limbs congenital              | Musculoskeletal and connective tissue disorders congenital | Congenital, familial and genetic disorders |
| Limb reduction defect     | Musculoskeletal and connective tissue disorders of limbs congenital              | Musculoskeletal and connective tissue disorders congenital | Congenital, familial and genetic disorders |
| Lipidosis                 | Lysosomal storage disorders                                                      | Metabolic and nutritional disorders congenital             | Congenital, familial and genetic disorders |
| Liver disorder            | Hepatic and hepatobiliary disorders NEC                                          | Hepatic and hepatobiliary disorders                        | Hepatobiliary disorders                    |
| Liver transplant          | Hepatic therapeutic procedures                                                   | Hepatobiliary therapeutic procedures                       | Surgical and medical procedures            |
| Low set ears              | External ear disorders congenital                                                | Ear and labyrinthine disorders congenital                  | Congenital, familial and genetic disorders |
| Lupoid hepatic cirrhosis  | Hepatic fibrosis and cirrhosis                                                   | Hepatic and hepatobiliary disorders                        | Hepatobiliary disorders                    |
| Lymphocyte count abnormal | White blood cell analyses                                                        | Haematology investigations (incl blood groups)             | Investigations                             |
| Lymphocytopenia neonatal  | Leukopenias NEC                                                                  | White blood cell disorders                                 | Blood and lymphatic system disorders       |
| Macrocheilia              | Musculoskeletal and connective tissue disorders of face, neck and jaw congenital | Musculoskeletal and connective tissue disorders congenital | Congenital, familial and genetic disorders |
| Macroductyly              | Musculoskeletal and connective tissue disorders of limbs congenital              | Musculoskeletal and connective tissue disorders congenital | Congenital, familial and genetic disorders |
| Macrogenia                | Musculoskeletal and connective tissue disorders of face, neck and jaw congenital | Musculoskeletal and connective tissue disorders congenital | Congenital, familial and genetic disorders |

|                               |                                                                                  |                                                            |                                            |
|-------------------------------|----------------------------------------------------------------------------------|------------------------------------------------------------|--------------------------------------------|
| Macroglossia                  | Tongue disorders congenital                                                      | Gastrointestinal tract disorders congenital                | Congenital, familial and genetic disorders |
| Macrostomia                   | Musculoskeletal and connective tissue disorders of face, neck and jaw congenital | Musculoskeletal and connective tissue disorders congenital | Congenital, familial and genetic disorders |
| Macrotia                      | External ear disorders congenital                                                | Ear and labyrinthine disorders congenital                  | Congenital, familial and genetic disorders |
| Macular dystrophy congenital  | Retinal disorders congenital                                                     | Eye disorders congenital                                   | Congenital, familial and genetic disorders |
| Malformation biliary          | Hepatobiliary abnormalities congenital                                           | Hepatobiliary disorders congenital                         | Congenital, familial and genetic disorders |
| Malformation venous           | Venous disorders congenital                                                      | Cardiac and vascular disorders congenital                  | Congenital, familial and genetic disorders |
| Maple syrup disease           | Inborn errors of amino acid metabolism                                           | Metabolic and nutritional disorders congenital             | Congenital, familial and genetic disorders |
| Marfan's syndrome             | Musculoskeletal and connective tissue disorders of limbs congenital              | Musculoskeletal and connective tissue disorders congenital | Congenital, familial and genetic disorders |
| Megakaryocytes decreased      | Bone marrow and immune tissue histopathology procedures                          | Haematology investigations (incl blood groups)             | Investigations                             |
| Melkersson-Rosenthal syndrome | Skin and subcutaneous tissue disorders congenital NEC                            | Skin and subcutaneous tissue disorders congenital          | Congenital, familial and genetic disorders |
| Meningocele                   | Central nervous system disorders congenital NEC                                  | Neurological disorders congenital                          | Congenital, familial and genetic disorders |
| Meningomyelocele              | Central nervous system disorders congenital NEC                                  | Neurological disorders congenital                          | Congenital, familial and genetic disorders |
| Menkes' syndrome              | Congenital disorders NEC                                                         | Congenital and hereditary disorders NEC                    | Congenital, familial and genetic disorders |
| Metatarsus primus varus       | Musculoskeletal and connective tissue disorders of limbs congenital              | Musculoskeletal and connective tissue disorders congenital | Congenital, familial and genetic disorders |



|                          |                                                                                  |                                                            |                                            |
|--------------------------|----------------------------------------------------------------------------------|------------------------------------------------------------|--------------------------------------------|
| Microcephaly             | Musculoskeletal and connective tissue disorders of skull congenital              | Musculoskeletal and connective tissue disorders congenital | Congenital, familial and genetic disorders |
| Microcheilia             | Musculoskeletal and connective tissue disorders of face, neck and jaw congenital | Musculoskeletal and connective tissue disorders congenital | Congenital, familial and genetic disorders |
| Microgenia               | Musculoskeletal and connective tissue disorders of face, neck and jaw congenital | Musculoskeletal and connective tissue disorders congenital | Congenital, familial and genetic disorders |
| Microglossia             | Tongue disorders congenital                                                      | Gastrointestinal tract disorders congenital                | Congenital, familial and genetic disorders |
| Micrognathia             | Musculoskeletal and connective tissue disorders of face, neck and jaw congenital | Musculoskeletal and connective tissue disorders congenital | Congenital, familial and genetic disorders |
| Microphthalmos           | Ocular disorders congenital NEC                                                  | Eye disorders congenital                                   | Congenital, familial and genetic disorders |
| Microstomia              | Musculoskeletal and connective tissue disorders of face, neck and jaw congenital | Musculoskeletal and connective tissue disorders congenital | Congenital, familial and genetic disorders |
| Microtia                 | External ear disorders congenital                                                | Ear and labyrinthine disorders congenital                  | Congenital, familial and genetic disorders |
| Mitochondrial myopathy   | Genetic mitochondrial abnormalities NEC                                          | Cytoplasmic disorders congenital                           | Congenital, familial and genetic disorders |
| Moebius II syndrome      | Neurological disorders congenital NEC                                            | Neurological disorders congenital                          | Congenital, familial and genetic disorders |
| Monocyte count decreased | White blood cell analyses                                                        | Haematology investigations (incl blood groups)             | Investigations                             |
| Monocytopenia            | Leukopenias NEC                                                                  | White blood cell disorders                                 | Blood and lymphatic system disorders       |
| Morning glory syndrome   | Optic nerve and optic disc disorders congenital                                  | Eye disorders congenital                                   | Congenital, familial and genetic disorders |
| Mucopolysaccharidosis    | Lysosomal storage disorders                                                      | Metabolic and nutritional disorders congenital             | Congenital, familial and genetic disorders |

|                                    |                                                 |                                                            |                                                |
|------------------------------------|-------------------------------------------------|------------------------------------------------------------|------------------------------------------------|
| Mucopolysaccharidosis IV           | Lysosomal storage disorders                     | Metabolic and nutritional disorders congenital             | Congenital, familial and genetic disorders     |
| Multiple carboxylase deficiency    | Inborn errors of amino acid metabolism          | Metabolic and nutritional disorders congenital             | Congenital, familial and genetic disorders     |
| Multiple cardiac defects           | Multiple cardiac abnormalities congenital       | Cardiac and vascular disorders congenital                  | Congenital, familial and genetic disorders     |
| Multiple congenital abnormalities  | Congenital disorders NEC                        | Congenital and hereditary disorders NEC                    | Congenital, familial and genetic disorders     |
| Multiple epiphyseal dysplasia      | Musculoskeletal disorders congenital NEC        | Musculoskeletal and connective tissue disorders congenital | Congenital, familial and genetic disorders     |
| Multiple gastrointestinal atresias | Gastrointestinal tract disorders congenital NEC | Gastrointestinal tract disorders congenital                | Congenital, familial and genetic disorders     |
| Muscular dystrophy                 | Non-site specific muscle disorders congenital   | Musculoskeletal and connective tissue disorders congenital | Congenital, familial and genetic disorders     |
| Mutagenic effect                   | Chromosomal abnormalities NEC                   | Chromosomal abnormalities and abnormal gene carriers       | Congenital, familial and genetic disorders     |
| Myeloid maturation arrest          | Marrow depression and hypoplastic anaemias      | Anaemias nonhaemolytic and marrow depression               | Blood and lymphatic system disorders           |
| Myotonia congenita                 | Non-site specific muscle disorders congenital   | Musculoskeletal and connective tissue disorders congenital | Congenital, familial and genetic disorders     |
| Nephritis haemorrhagic             | Nephritis NEC                                   | Nephropathies                                              | Renal and urinary disorders                    |
| Nephritis radiation                | Radiation injuries                              | Injuries by physical agents                                | Injury, poisoning and procedural complications |
| Nephrotic syndrome                 | Glomerulonephritis and nephrotic syndrome       | Nephropathies                                              | Renal and urinary disorders                    |
| Neuroleptic malignant syndrome     | Muscle tone abnormal                            | Neuromuscular disorders                                    | Nervous system disorders                       |
| Neutropenia                        | Neutropenias                                    | White blood cell disorders                                 | Blood and lymphatic system disorders           |

|                            |                                                                                  |                                                            |                                            |
|----------------------------|----------------------------------------------------------------------------------|------------------------------------------------------------|--------------------------------------------|
| Neutropenia neonatal       | Neutropenias                                                                     | White blood cell disorders                                 | Blood and lymphatic system disorders       |
| Neutrophil count decreased | White blood cell analyses                                                        | Haematology investigations (incl blood groups)             | Investigations                             |
| Niemann-Pick disease       | Lysosomal storage disorders                                                      | Metabolic and nutritional disorders congenital             | Congenital, familial and genetic disorders |
| Noonan syndrome            | Musculoskeletal disorders congenital NEC                                         | Musculoskeletal and connective tissue disorders congenital | Congenital, familial and genetic disorders |
| Oesophageal atresia        | Oesophageal disorders congenital                                                 | Gastrointestinal tract disorders congenital                | Congenital, familial and genetic disorders |
| Osteogenesis imperfecta    | Non-site specific bone disorders congenital                                      | Musculoskeletal and connective tissue disorders congenital | Congenital, familial and genetic disorders |
| Osteopetrosis              | Non-site specific bone disorders congenital                                      | Musculoskeletal and connective tissue disorders congenital | Congenital, familial and genetic disorders |
| Osteopoikilosis            | Non-site specific bone disorders congenital                                      | Musculoskeletal and connective tissue disorders congenital | Congenital, familial and genetic disorders |
| Ovarian agenesis           | Female reproductive tract disorders congenital                                   | Reproductive tract and breast disorders congenital         | Congenital, familial and genetic disorders |
| Pancytopenia               | Marrow depression and hypoplastic anaemias                                       | Anaemias nonhaemolytic and marrow depression               | Blood and lymphatic system disorders       |
| Patent ductus arteriosus   | Persistent foetal circulation disorders                                          | Cardiac and vascular disorders congenital                  | Congenital, familial and genetic disorders |
| Pectus carinatum           | Musculoskeletal and connective tissue disorders of trunk congenital (excl spine) | Musculoskeletal and connective tissue disorders congenital | Congenital, familial and genetic disorders |
| Pectus excavatum           | Musculoskeletal and connective tissue disorders of trunk congenital (excl spine) | Musculoskeletal and connective tissue disorders congenital | Congenital, familial and genetic disorders |
| Pelvi-ureteric obstruction | Renal obstructive disorders                                                      | Renal disorders (excl nephropathies)                       | Renal and urinary disorders                |

|                               |                                                                                  |                                                            |                                                      |
|-------------------------------|----------------------------------------------------------------------------------|------------------------------------------------------------|------------------------------------------------------|
| Pelvic fibrosis               | Fibrosis NEC                                                                     | Tissue disorders NEC                                       | General disorders and administration site conditions |
| Pelvic kidney                 | Renal disorders congenital                                                       | Renal and urinary tract disorders congenital               | Congenital, familial and genetic disorders           |
| Peroneal muscular atrophy     | Peripheral nervous system disorders congenital NEC                               | Neurological disorders congenital                          | Congenital, familial and genetic disorders           |
| Persistent foetal circulation | Persistent foetal circulation disorders                                          | Cardiac and vascular disorders congenital                  | Congenital, familial and genetic disorders           |
| Phenylketonuria               | Inborn errors of amino acid metabolism                                           | Metabolic and nutritional disorders congenital             | Congenital, familial and genetic disorders           |
| Phimosis                      | Male reproductive tract disorders congenital                                     | Reproductive tract and breast disorders congenital         | Congenital, familial and genetic disorders           |
| Pierre Robin syndrome         | Musculoskeletal and connective tissue disorders of face, neck and jaw congenital | Musculoskeletal and connective tissue disorders congenital | Congenital, familial and genetic disorders           |
| Plasma cells absent           | White blood cell analyses                                                        | Haematology investigations (incl blood groups)             | Investigations                                       |
| Platelet maturation arrest    | Marrow depression and hypoplastic anaemias                                       | Anaemias nonhaemolytic and marrow depression               | Blood and lymphatic system disorders                 |
| Platelet production decreased | Thrombocytopenias                                                                | Platelet disorders                                         | Blood and lymphatic system disorders                 |
| Poland's syndrome             | Musculoskeletal and connective tissue disorders of limbs congenital              | Musculoskeletal and connective tissue disorders congenital | Congenital, familial and genetic disorders           |
| Polydactyly                   | Musculoskeletal and connective tissue disorders of limbs congenital              | Musculoskeletal and connective tissue disorders congenital | Congenital, familial and genetic disorders           |
| Porencephaly                  | Cerebral disorders congenital                                                    | Neurological disorders congenital                          | Congenital, familial and genetic disorders           |
| Porokeratosis                 | Skin and subcutaneous tissue disorders congenital NEC                            | Skin and subcutaneous tissue disorders congenital          | Congenital, familial and genetic disorders           |

|                                       |                                                                                  |                                                            |                                            |
|---------------------------------------|----------------------------------------------------------------------------------|------------------------------------------------------------|--------------------------------------------|
| Porphyria                             | Inborn errors of porphyrin metabolism                                            | Metabolic and nutritional disorders congenital             | Congenital, familial and genetic disorders |
| Porphyria acute                       | Inborn errors of porphyrin metabolism                                            | Metabolic and nutritional disorders congenital             | Congenital, familial and genetic disorders |
| Porphyria non-acute                   | Inborn errors of porphyrin metabolism                                            | Metabolic and nutritional disorders congenital             | Congenital, familial and genetic disorders |
| Porphyrinuria                         | Inborn errors of porphyrin metabolism                                            | Metabolic and nutritional disorders congenital             | Congenital, familial and genetic disorders |
| Portal hypertension                   | Hepatic vascular disorders                                                       | Hepatic and hepatobiliary disorders                        | Hepatobiliary disorders                    |
| Post streptococcal glomerulonephritis | Glomerulonephritis and nephrotic syndrome                                        | Nephropathies                                              | Renal and urinary disorders                |
| Postauricular fistula                 | Ear disorders congenital NEC                                                     | Ear and labyrinthine disorders congenital                  | Congenital, familial and genetic disorders |
| Potter's syndrome                     | Renal disorders congenital                                                       | Renal and urinary tract disorders congenital               | Congenital, familial and genetic disorders |
| Prader-Willi syndrome                 | Neurological disorders congenital NEC                                            | Neurological disorders congenital                          | Congenital, familial and genetic disorders |
| Preauricular cyst                     | Musculoskeletal and connective tissue disorders of face, neck and jaw congenital | Musculoskeletal and connective tissue disorders congenital | Congenital, familial and genetic disorders |
| Primary cerebellar degeneration       | Cerebellar disorders congenital                                                  | Neurological disorders congenital                          | Congenital, familial and genetic disorders |
| Progeria                              | Congenital disorders NEC                                                         | Congenital and hereditary disorders NEC                    | Congenital, familial and genetic disorders |
| Progressive cerebellar degeneration   | Cerebellar disorders congenital                                                  | Neurological disorders congenital                          | Congenital, familial and genetic disorders |
| Progressive external ophthalmoplegia  | Genetic mitochondrial abnormalities NEC                                          | Cytoplasmic disorders congenital                           | Congenital, familial and genetic disorders |
| Pseudohermaphroditism                 | Reproductive tract disorders congenital NEC                                      | Reproductive tract and breast disorders                    | Congenital, familial and genetic           |

|                                      |                                                |                                                            |                                            |
|--------------------------------------|------------------------------------------------|------------------------------------------------------------|--------------------------------------------|
|                                      |                                                | congenital                                                 | disorders                                  |
| Pseudohermaphroditism female         | Female reproductive tract disorders congenital | Reproductive tract and breast disorders congenital         | Congenital, familial and genetic disorders |
| Pseudohermaphroditism male           | Male reproductive tract disorders congenital   | Reproductive tract and breast disorders congenital         | Congenital, familial and genetic disorders |
| Pseudohypoparathyroidism             | Endocrine disorders congenital NEC             | Endocrine disorders congenital                             | Congenital, familial and genetic disorders |
| Pseudomembranous colitis             | Clostridia infections                          | Bacterial infectious disorders                             | Infections and infestations                |
| Pseudoxanthoma elasticum             | Connective tissue disorders congenital         | Musculoskeletal and connective tissue disorders congenital | Congenital, familial and genetic disorders |
| Pulmonary aplasia                    | Pulmonary and bronchial disorders congenital   | Respiratory disorders congenital                           | Congenital, familial and genetic disorders |
| Pulmonary arteriovenous fistula      | Vascular anomalies congenital NEC              | Cardiac and vascular disorders congenital                  | Congenital, familial and genetic disorders |
| Pulmonary artery atresia             | Arterial disorders congenital                  | Cardiac and vascular disorders congenital                  | Congenital, familial and genetic disorders |
| Pulmonary artery stenosis congenital | Arterial disorders congenital                  | Cardiac and vascular disorders congenital                  | Congenital, familial and genetic disorders |
| Pulmonary hypoplasia                 | Pulmonary and bronchial disorders congenital   | Respiratory disorders congenital                           | Congenital, familial and genetic disorders |
| Pulmonary malformation               | Pulmonary and bronchial disorders congenital   | Respiratory disorders congenital                           | Congenital, familial and genetic disorders |
| Pulmonary valve stenosis congenital  | Cardiac valve disorders congenital             | Cardiac and vascular disorders congenital                  | Congenital, familial and genetic disorders |
| Pyloric stenosis                     | Gastric disorders congenital                   | Gastrointestinal tract disorders congenital                | Congenital, familial and genetic disorders |
| Pyruvate kinase deficiency anaemia   | Anaemias congenital (excl haemoglobinopathies) | Blood and lymphatic system disorders                       | Congenital, familial and genetic           |

|                                      |                                                                     |                                                            |                                            |
|--------------------------------------|---------------------------------------------------------------------|------------------------------------------------------------|--------------------------------------------|
|                                      |                                                                     | congenital                                                 | disorders                                  |
| Radioulnar synostosis                | Musculoskeletal and connective tissue disorders of limbs congenital | Musculoskeletal and connective tissue disorders congenital | Congenital, familial and genetic disorders |
| Rectal atresia                       | Anorectal disorders congenital                                      | Gastrointestinal tract disorders congenital                | Congenital, familial and genetic disorders |
| Refsum's disease                     | Lysosomal storage disorders                                         | Metabolic and nutritional disorders congenital             | Congenital, familial and genetic disorders |
| Renal arteriovenous malformation     | Vascular anomalies congenital NEC                                   | Cardiac and vascular disorders congenital                  | Congenital, familial and genetic disorders |
| Renal dysplasia                      | Renal disorders congenital                                          | Renal and urinary tract disorders congenital               | Congenital, familial and genetic disorders |
| Renal vessel congenital anomaly      | Vascular anomalies congenital NEC                                   | Cardiac and vascular disorders congenital                  | Congenital, familial and genetic disorders |
| Respiratory tract malformation       | Respiratory tract disorders congenital NEC                          | Respiratory disorders congenital                           | Congenital, familial and genetic disorders |
| Retinal anomaly congenital           | Retinal disorders congenital                                        | Eye disorders congenital                                   | Congenital, familial and genetic disorders |
| Retinal arteriovenous malformation   | Vascular anomalies congenital NEC                                   | Cardiac and vascular disorders congenital                  | Congenital, familial and genetic disorders |
| Retinitis pigmentosa                 | Retinal disorders congenital                                        | Eye disorders congenital                                   | Congenital, familial and genetic disorders |
| Retinoschisis congenital             | Retinal disorders congenital                                        | Eye disorders congenital                                   | Congenital, familial and genetic disorders |
| Rett's disorder                      | Inborn errors of amino acid metabolism                              | Metabolic and nutritional disorders congenital             | Congenital, familial and genetic disorders |
| Reye's syndrome                      | Hepatocellular damage and hepatitis NEC                             | Hepatic and hepatobiliary disorders                        | Hepatobiliary disorders                    |
| Rhesus haemolytic disease of newborn | Anaemias congenital (excl haemoglobinopathies)                      | Blood and lymphatic system disorders                       | Congenital, familial and genetic           |

|                                    |                                                                                  |                                                            |                                            |
|------------------------------------|----------------------------------------------------------------------------------|------------------------------------------------------------|--------------------------------------------|
|                                    |                                                                                  | congenital                                                 | disorders                                  |
| Rickets familial hypophosphataemic | Non-site specific bone disorders congenital                                      | Musculoskeletal and connective tissue disorders congenital | Congenital, familial and genetic disorders |
| Riley-Day syndrome                 | Neurological disorders congenital NEC                                            | Neurological disorders congenital                          | Congenital, familial and genetic disorders |
| Rotor's syndrome                   | Inborn errors of bilirubin metabolism                                            | Metabolic and nutritional disorders congenital             | Congenital, familial and genetic disorders |
| Rubinstein-Taybi syndrome          | Musculoskeletal and connective tissue disorders of face, neck and jaw congenital | Musculoskeletal and connective tissue disorders congenital | Congenital, familial and genetic disorders |
| Sensory neuropathy hereditary      | Peripheral nervous system disorders congenital NEC                               | Neurological disorders congenital                          | Congenital, familial and genetic disorders |
| Serotonin syndrome                 | Muscle tone abnormal                                                             | Neuromuscular disorders                                    | Nervous system disorders                   |
| Sickle cell anaemia                | Haemoglobinopathies congenital                                                   | Blood and lymphatic system disorders congenital            | Congenital, familial and genetic disorders |
| Sickle cell trait                  | Haemoglobinopathies congenital                                                   | Blood and lymphatic system disorders congenital            | Congenital, familial and genetic disorders |
| Skin hypoplasia                    | Skin and subcutaneous tissue disorders congenital NEC                            | Skin and subcutaneous tissue disorders congenital          | Congenital, familial and genetic disorders |
| Skin malformation                  | Skin and subcutaneous tissue disorders congenital NEC                            | Skin and subcutaneous tissue disorders congenital          | Congenital, familial and genetic disorders |
| Special senses congenital anomaly  | Congenital disorders NEC                                                         | Congenital and hereditary disorders NEC                    | Congenital, familial and genetic disorders |
| Spherophakia                       | Lens disorders congenital                                                        | Eye disorders congenital                                   | Congenital, familial and genetic disorders |
| Spina bifida                       | Central nervous system disorders congenital NEC                                  | Neurological disorders congenital                          | Congenital, familial and genetic disorders |
| Spina bifida occulta               | Central nervous system disorders congenital NEC                                  | Neurological disorders congenital                          | Congenital, familial and genetic           |



|                         |                                                                     |                                                            |                                            |
|-------------------------|---------------------------------------------------------------------|------------------------------------------------------------|--------------------------------------------|
|                         |                                                                     |                                                            | disorders                                  |
| Spinal muscular atrophy | Neurological disorders congenital NEC                               | Neurological disorders congenital                          | Congenital, familial and genetic disorders |
| Spine malformation      | Musculoskeletal and connective tissue disorders of spine congenital | Musculoskeletal and connective tissue disorders congenital | Congenital, familial and genetic disorders |
| Strabismus congenital   | Ocular disorders congenital NEC                                     | Eye disorders congenital                                   | Congenital, familial and genetic disorders |
| Sturge-Weber syndrome   | Vascular anomalies congenital NEC                                   | Cardiac and vascular disorders congenital                  | Congenital, familial and genetic disorders |
| Supernumerary nipple    | Breast disorders congenital                                         | Reproductive tract and breast disorders congenital         | Congenital, familial and genetic disorders |
| Syndactyly              | Musculoskeletal and connective tissue disorders of limbs congenital | Musculoskeletal and connective tissue disorders congenital | Congenital, familial and genetic disorders |
| Syringomyelia           | Central nervous system disorders congenital NEC                     | Neurological disorders congenital                          | Congenital, familial and genetic disorders |
| Talipes                 | Musculoskeletal and connective tissue disorders of limbs congenital | Musculoskeletal and connective tissue disorders congenital | Congenital, familial and genetic disorders |
| Tay-Sachs disease       | Lysosomal storage disorders                                         | Metabolic and nutritional disorders congenital             | Congenital, familial and genetic disorders |
| Teratogenicity          | Congenital disorders NEC                                            | Congenital and hereditary disorders NEC                    | Congenital, familial and genetic disorders |
| Thalassaemia            | Haemoglobinopathies congenital                                      | Blood and lymphatic system disorders congenital            | Congenital, familial and genetic disorders |
| Thalassaemia alpha      | Haemoglobinopathies congenital                                      | Blood and lymphatic system disorders congenital            | Congenital, familial and genetic disorders |
| Thalassaemia beta       | Haemoglobinopathies congenital                                      | Blood and lymphatic system disorders congenital            | Congenital, familial and genetic disorders |

|                                    |                                             |                                                      |                                            |
|------------------------------------|---------------------------------------------|------------------------------------------------------|--------------------------------------------|
| Thalassaemia sickle cell           | Haemoglobinopathies congenital              | Blood and lymphatic system disorders congenital      | Congenital, familial and genetic disorders |
| Thalassaemia trait                 | Haemoglobinopathies congenital              | Blood and lymphatic system disorders congenital      | Congenital, familial and genetic disorders |
| Tooth discolouration congenital    | Dental disorders congenital                 | Gastrointestinal tract disorders congenital          | Congenital, familial and genetic disorders |
| Tooth hypoplasia                   | Dental disorders congenital                 | Gastrointestinal tract disorders congenital          | Congenital, familial and genetic disorders |
| Tooth malformation hereditary      | Dental disorders congenital                 | Gastrointestinal tract disorders congenital          | Congenital, familial and genetic disorders |
| Tourette's disorder                | Neurological disorders congenital NEC       | Neurological disorders congenital                    | Congenital, familial and genetic disorders |
| Tracheo-oesophageal fistula        | Laryngeal and tracheal disorders congenital | Respiratory disorders congenital                     | Congenital, familial and genetic disorders |
| Transposition of the great vessels | Great vessel disorders congenital           | Cardiac and vascular disorders congenital            | Congenital, familial and genetic disorders |
| Trisomy 11                         | Autosomal chromosomal abnormalities         | Chromosomal abnormalities and abnormal gene carriers | Congenital, familial and genetic disorders |
| Trisomy 13                         | Autosomal chromosomal abnormalities         | Chromosomal abnormalities and abnormal gene carriers | Congenital, familial and genetic disorders |
| Trisomy 21                         | Autosomal chromosomal abnormalities         | Chromosomal abnormalities and abnormal gene carriers | Congenital, familial and genetic disorders |
| Trisomy 22                         | Autosomal chromosomal abnormalities         | Chromosomal abnormalities and abnormal gene carriers | Congenital, familial and genetic disorders |
| Truncus arteriosus persistent      | Great vessel disorders congenital           | Cardiac and vascular disorders congenital            | Congenital, familial and genetic disorders |
| Tuberous sclerosis                 | Cerebral disorders congenital               | Neurological disorders congenital                    | Congenital, familial and genetic disorders |

|                             |                                                  |                                                      |                                            |
|-----------------------------|--------------------------------------------------|------------------------------------------------------|--------------------------------------------|
| Turner's syndrome           | Sex chromosomal abnormalities                    | Chromosomal abnormalities and abnormal gene carriers | Congenital, familial and genetic disorders |
| Type II hyperlipidaemia     | Inborn errors of lipid metabolism                | Metabolic and nutritional disorders congenital       | Congenital, familial and genetic disorders |
| Type IIa hyperlipidaemia    | Inborn errors of lipid metabolism                | Metabolic and nutritional disorders congenital       | Congenital, familial and genetic disorders |
| Type IIb hyperlipidaemia    | Inborn errors of lipid metabolism                | Metabolic and nutritional disorders congenital       | Congenital, familial and genetic disorders |
| Umbilical artery hypoplasia | Arterial disorders congenital                    | Cardiac and vascular disorders congenital            | Congenital, familial and genetic disorders |
| Umbilical malformation      | Gastrointestinal tract disorders congenital NEC  | Gastrointestinal tract disorders congenital          | Congenital, familial and genetic disorders |
| Univentricular heart        | Cardiac septal defects congenital                | Cardiac and vascular disorders congenital            | Congenital, familial and genetic disorders |
| Ureteric dilatation         | Ureteric disorders NEC                           | Ureteric disorders                                   | Renal and urinary disorders                |
| Ureteric obstruction        | Ureteric disorders NEC                           | Ureteric disorders                                   | Renal and urinary disorders                |
| Ureteric stenosis           | Ureteric disorders NEC                           | Ureteric disorders                                   | Renal and urinary disorders                |
| Urethral valves             | Renal and urinary tract disorders congenital NEC | Renal and urinary tract disorders congenital         | Congenital, familial and genetic disorders |
| Urinary tract malformation  | Renal and urinary tract disorders congenital NEC | Renal and urinary tract disorders congenital         | Congenital, familial and genetic disorders |
| Vaginal atresia             | Female reproductive tract disorders congenital   | Reproductive tract and breast disorders congenital   | Congenital, familial and genetic disorders |
| Ventricular hypoplasia      | Cardiac hypoplasias congenital                   | Cardiac and vascular disorders congenital            | Congenital, familial and genetic disorders |
| Ventricular septal defect   | Cardiac septal defects congenital                | Cardiac and vascular disorders congenital            | Congenital, familial and genetic disorders |

|                                 |                                                                     |                                                            |                                            |
|---------------------------------|---------------------------------------------------------------------|------------------------------------------------------------|--------------------------------------------|
| Virilism foetal                 | Reproductive tract disorders congenital NEC                         | Reproductive tract and breast disorders congenital         | Congenital, familial and genetic disorders |
| Von Willebrand's disease        | Coagulation disorders congenital                                    | Blood and lymphatic system disorders congenital            | Congenital, familial and genetic disorders |
| Von Hippel-Lindau disease       | Central nervous system disorders congenital NEC                     | Neurological disorders congenital                          | Congenital, familial and genetic disorders |
| White blood cell count abnormal | White blood cell analyses                                           | Haematology investigations (incl blood groups)             | Investigations                             |
| Wiskott-Aldrich syndrome        | Immune system abnormalities congenital                              | Immune system disorders congenital                         | Congenital, familial and genetic disorders |
| Xeroderma pigmentosum           | Skin and subcutaneous tissue disorders congenital NEC               | Skin and subcutaneous tissue disorders congenital          | Congenital, familial and genetic disorders |
| XXXY syndrome                   | Sex chromosomal abnormalities                                       | Chromosomal abnormalities and abnormal gene carriers       | Congenital, familial and genetic disorders |
| XXYY syndrome                   | Sex chromosomal abnormalities                                       | Chromosomal abnormalities and abnormal gene carriers       | Congenital, familial and genetic disorders |
| Yellow skin                     | Dermal and epidermal conditions NEC                                 | Epidermal and dermal conditions                            | Skin and subcutaneous tissue disorders     |
| Brain malformation              | Central nervous system disorders congenital NEC                     | Neurological disorders congenital                          | Congenital, familial and genetic disorders |
| Dandy-Walker syndrome           | Cerebral disorders congenital                                       | Neurological disorders congenital                          | Congenital, familial and genetic disorders |
| Limb hypoplasia congenital      | Musculoskeletal and connective tissue disorders of limbs congenital | Musculoskeletal and connective tissue disorders congenital | Congenital, familial and genetic disorders |
| Kyphosis congenital             | Musculoskeletal and connective tissue disorders of spine congenital | Musculoskeletal and connective tissue disorders congenital | Congenital, familial and genetic disorders |
| Plagiocephaly                   | Musculoskeletal and connective tissue disorders of skull congenital | Musculoskeletal and connective tissue disorders congenital | Congenital, familial and genetic disorders |

|                                        |                                                                     |                                                            |                                            |
|----------------------------------------|---------------------------------------------------------------------|------------------------------------------------------------|--------------------------------------------|
| Cholaemia                              | Hepatic and hepatobiliary disorders NEC                             | Hepatic and hepatobiliary disorders                        | Hepatobiliary disorders                    |
| Wyburn Mason's syndrome                | Vascular anomalies congenital NEC                                   | Cardiac and vascular disorders congenital                  | Congenital, familial and genetic disorders |
| Sjogren-Larsson syndrome               | Neurological disorders congenital NEC                               | Neurological disorders congenital                          | Congenital, familial and genetic disorders |
| Schimke immunoosseous dysplasia        | Non-site specific bone disorders congenital                         | Musculoskeletal and connective tissue disorders congenital | Congenital, familial and genetic disorders |
| Homocystinaemia                        | Inborn errors of amino acid metabolism                              | Metabolic and nutritional disorders congenital             | Congenital, familial and genetic disorders |
| Congenital dermal sinus                | Congenital disorders NEC                                            | Congenital and hereditary disorders NEC                    | Congenital, familial and genetic disorders |
| Accessory kidney                       | Renal disorders congenital                                          | Renal and urinary tract disorders congenital               | Congenital, familial and genetic disorders |
| Congenital cerebellar agenesis         | Cerebellar disorders congenital                                     | Neurological disorders congenital                          | Congenital, familial and genetic disorders |
| Keratitis-ichthyosis-deafness syndrome | Congenital disorders NEC                                            | Congenital and hereditary disorders NEC                    | Congenital, familial and genetic disorders |
| Congenital scrotal hypertrophy         | Male reproductive tract disorders congenital                        | Reproductive tract and breast disorders congenital         | Congenital, familial and genetic disorders |
| Congenital thymus absence              | Immune system abnormalities congenital                              | Immune system disorders congenital                         | Congenital, familial and genetic disorders |
| Kearns-Sayre syndrome                  | Genetic mitochondrial abnormalities NEC                             | Cytoplasmic disorders congenital                           | Congenital, familial and genetic disorders |
| Polycystic liver disease               | Hepatobiliary abnormalities congenital                              | Hepatobiliary disorders congenital                         | Congenital, familial and genetic disorders |
| Congenital kyphoscoliosis              | Musculoskeletal and connective tissue disorders of spine congenital | Musculoskeletal and connective tissue disorders congenital | Congenital, familial and genetic disorders |

|                                     |                                                                                  |                                                            |                                            |
|-------------------------------------|----------------------------------------------------------------------------------|------------------------------------------------------------|--------------------------------------------|
| Rib hypoplasia                      | Musculoskeletal and connective tissue disorders of trunk congenital (excl spine) | Musculoskeletal and connective tissue disorders congenital | Congenital, familial and genetic disorders |
| Pachygyria                          | Cerebral disorders congenital                                                    | Neurological disorders congenital                          | Congenital, familial and genetic disorders |
| Lissencephaly                       | Cerebral disorders congenital                                                    | Neurological disorders congenital                          | Congenital, familial and genetic disorders |
| Factor V deficiency                 | Coagulation disorders congenital                                                 | Blood and lymphatic system disorders congenital            | Congenital, familial and genetic disorders |
| Uhl's anomaly                       | Cardiac hypoplasias congenital                                                   | Cardiac and vascular disorders congenital                  | Congenital, familial and genetic disorders |
| Congenital hyperextension of spine  | Musculoskeletal and connective tissue disorders of spine congenital              | Musculoskeletal and connective tissue disorders congenital | Congenital, familial and genetic disorders |
| Congenital hyperextension of knee   | Musculoskeletal and connective tissue disorders of limbs congenital              | Musculoskeletal and connective tissue disorders congenital | Congenital, familial and genetic disorders |
| Angelman's syndrome                 | Autosomal chromosomal abnormalities                                              | Chromosomal abnormalities and abnormal gene carriers       | Congenital, familial and genetic disorders |
| Congenital limb hyperextension      | Musculoskeletal and connective tissue disorders of limbs congenital              | Musculoskeletal and connective tissue disorders congenital | Congenital, familial and genetic disorders |
| Camptodactyly congenital            | Musculoskeletal and connective tissue disorders of limbs congenital              | Musculoskeletal and connective tissue disorders congenital | Congenital, familial and genetic disorders |
| Erythrokeratoderma variabilis       | Skin and subcutaneous tissue disorders congenital NEC                            | Skin and subcutaneous tissue disorders congenital          | Congenital, familial and genetic disorders |
| Congenital adrenal gland hypoplasia | Adrenal disorders congenital                                                     | Endocrine disorders congenital                             | Congenital, familial and genetic disorders |
| Cohen syndrome                      | Musculoskeletal disorders congenital NEC                                         | Musculoskeletal and connective tissue disorders congenital | Congenital, familial and genetic disorders |
| Renal hypoplasia                    | Renal disorders congenital                                                       | Renal and urinary tract disorders congenital               | Congenital, familial and genetic disorders |

|                                    |                                                                     |                                                            |                                                      |
|------------------------------------|---------------------------------------------------------------------|------------------------------------------------------------|------------------------------------------------------|
| Neutropenic sepsis                 | Sepsis, bacteraemia, viraemia and fungaemia NEC                     | Infections - pathogen unspecified                          | Infections and infestations                          |
| Red blood cell enzymes abnormal    | Anaemias congenital (excl haemoglobinopathies)                      | Blood and lymphatic system disorders congenital            | Congenital, familial and genetic disorders           |
| Adactyly                           | Musculoskeletal and connective tissue disorders of limbs congenital | Musculoskeletal and connective tissue disorders congenital | Congenital, familial and genetic disorders           |
| Aorta hypoplasia                   | Great vessel disorders congenital                                   | Cardiac and vascular disorders congenital                  | Congenital, familial and genetic disorders           |
| Mitral valve hypoplasia            | Cardiac valve disorders congenital                                  | Cardiac and vascular disorders congenital                  | Congenital, familial and genetic disorders           |
| Phalangeal hypoplasia              | Musculoskeletal and connective tissue disorders of limbs congenital | Musculoskeletal and connective tissue disorders congenital | Congenital, familial and genetic disorders           |
| Monopodia                          | Musculoskeletal and connective tissue disorders of limbs congenital | Musculoskeletal and connective tissue disorders congenital | Congenital, familial and genetic disorders           |
| Blepharophimosis congenital        | Eyelid disorders congenital                                         | Eye disorders congenital                                   | Congenital, familial and genetic disorders           |
| Ankyloglossia congenital           | Tongue disorders congenital                                         | Gastrointestinal tract disorders congenital                | Congenital, familial and genetic disorders           |
| Hypersplenism congenital           | Haematological disorders congenital NEC                             | Blood and lymphatic system disorders congenital            | Congenital, familial and genetic disorders           |
| Scaphocephaly                      | Musculoskeletal and connective tissue disorders of skull congenital | Musculoskeletal and connective tissue disorders congenital | Congenital, familial and genetic disorders           |
| Werner's syndrome                  | Autosomal chromosomal abnormalities                                 | Chromosomal abnormalities and abnormal gene carriers       | Congenital, familial and genetic disorders           |
| Congenital facial nerve hypoplasia | Neurological disorders congenital NEC                               | Neurological disorders congenital                          | Congenital, familial and genetic disorders           |
| Oedema due to hepatic disease      | Oedema NEC                                                          | General system disorders NEC                               | General disorders and administration site conditions |

|                                     |                                                                     |                                                            |                                            |
|-------------------------------------|---------------------------------------------------------------------|------------------------------------------------------------|--------------------------------------------|
| Williams syndrome                   | Cardiac valve disorders congenital                                  | Cardiac and vascular disorders congenital                  | Congenital, familial and genetic disorders |
| Congenital tricuspid valve atresia  | Cardiac valve disorders congenital                                  | Cardiac and vascular disorders congenital                  | Congenital, familial and genetic disorders |
| Accessory breast                    | Breast disorders congenital                                         | Reproductive tract and breast disorders congenital         | Congenital, familial and genetic disorders |
| Single umbilical artery             | Arterial disorders congenital                                       | Cardiac and vascular disorders congenital                  | Congenital, familial and genetic disorders |
| Thanatophoric dwarfism              | Musculoskeletal disorders congenital NEC                            | Musculoskeletal and connective tissue disorders congenital | Congenital, familial and genetic disorders |
| Achromotrichia congenital           | Hair and nail disorders congenital                                  | Skin and subcutaneous tissue disorders congenital          | Congenital, familial and genetic disorders |
| Craniosynostosis                    | Musculoskeletal and connective tissue disorders of skull congenital | Musculoskeletal and connective tissue disorders congenital | Congenital, familial and genetic disorders |
| Hypophosphatasia                    | Inborn errors of metabolism NEC                                     | Metabolic and nutritional disorders congenital             | Congenital, familial and genetic disorders |
| Congenital pyelocaliectasis         | Renal disorders congenital                                          | Renal and urinary tract disorders congenital               | Congenital, familial and genetic disorders |
| Ductus arteriosus premature closure | Arterial disorders congenital                                       | Cardiac and vascular disorders congenital                  | Congenital, familial and genetic disorders |
| Panmyelopathy                       | Marrow depression and hypoplastic anaemias                          | Anaemias nonhaemolytic and marrow depression               | Blood and lymphatic system disorders       |
| Pseudotruncus arteriosus            | Cardiovascular disorders congenital NEC                             | Cardiac and vascular disorders congenital                  | Congenital, familial and genetic disorders |
| Lipomeningocele                     | Central nervous system disorders congenital NEC                     | Neurological disorders congenital                          | Congenital, familial and genetic disorders |
| Macrocephaly                        | Musculoskeletal and connective tissue disorders of skull congenital | Musculoskeletal and connective tissue disorders congenital | Congenital, familial and genetic disorders |



|                                          |                                                                     |                                                            |                                                |
|------------------------------------------|---------------------------------------------------------------------|------------------------------------------------------------|------------------------------------------------|
| Camitine palmitoyltransferase deficiency | Inborn errors of lipid metabolism                                   | Metabolic and nutritional disorders congenital             | Congenital, familial and genetic disorders     |
| Congenital labia pudendi adhesions       | Female reproductive tract disorders congenital                      | Reproductive tract and breast disorders congenital         | Congenital, familial and genetic disorders     |
| Beckwith-Wiedemann syndrome              | Autosomal chromosomal abnormalities                                 | Chromosomal abnormalities and abnormal gene carriers       | Congenital, familial and genetic disorders     |
| Wolf-Hirschhorn syndrome                 | Autosomal chromosomal abnormalities                                 | Chromosomal abnormalities and abnormal gene carriers       | Congenital, familial and genetic disorders     |
| Granulocytes maturation arrest           | Marrow depression and hypoplastic anaemias                          | Anaemias nonhaemolytic and marrow depression               | Blood and lymphatic system disorders           |
| Holt-Oram syndrome                       | Autosomal chromosomal abnormalities                                 | Chromosomal abnormalities and abnormal gene carriers       | Congenital, familial and genetic disorders     |
| Leukopenia neonatal                      | Neonatal haematologic disorders (excl blood incompatibility)        | Neonatal and perinatal conditions                          | Pregnancy, puerperium and perinatal conditions |
| Langer-Giedion syndrome                  | Autosomal chromosomal abnormalities                                 | Chromosomal abnormalities and abnormal gene carriers       | Congenital, familial and genetic disorders     |
| Congenital scoliosis                     | Musculoskeletal and connective tissue disorders of spine congenital | Musculoskeletal and connective tissue disorders congenital | Congenital, familial and genetic disorders     |
| Exophthalmos congenital                  | Ocular disorders congenital NEC                                     | Eye disorders congenital                                   | Congenital, familial and genetic disorders     |
| Congenital pulmonary hypertension        | Respiratory tract disorders congenital NEC                          | Respiratory disorders congenital                           | Congenital, familial and genetic disorders     |
| Retinopathy congenital                   | Retinal disorders congenital                                        | Eye disorders congenital                                   | Congenital, familial and genetic disorders     |
| Bartter's syndrome                       | Renal and urinary tract disorders congenital NEC                    | Renal and urinary tract disorders congenital               | Congenital, familial and genetic disorders     |
| Naevus spider congenital                 | Skin and subcutaneous tissue disorders congenital NEC               | Skin and subcutaneous tissue disorders congenital          | Congenital, familial and genetic disorders     |

|                                                    |                                                  |                                                      |                                                |
|----------------------------------------------------|--------------------------------------------------|------------------------------------------------------|------------------------------------------------|
| Myeloblast count decreased                         | White blood cell analyses                        | Haematology investigations (incl blood groups)       | Investigations                                 |
| Congenital hydronephrosis                          | Renal and urinary tract disorders congenital NEC | Renal and urinary tract disorders congenital         | Congenital, familial and genetic disorders     |
| Metamyelocyte count decreased                      | White blood cell analyses                        | Haematology investigations (incl blood groups)       | Investigations                                 |
| Myelocyte count decreased                          | White blood cell analyses                        | Haematology investigations (incl blood groups)       | Investigations                                 |
| Promyelocyte count decreased                       | White blood cell analyses                        | Haematology investigations (incl blood groups)       | Investigations                                 |
| Radiation hepatitis                                | Radiation injuries                               | Injuries by physical agents                          | Injury, poisoning and procedural complications |
| Eagle Barrett syndrome                             | Gastrointestinal tract disorders congenital NEC  | Gastrointestinal tract disorders congenital          | Congenital, familial and genetic disorders     |
| Hyper IgE syndrome                                 | Autosomal chromosomal abnormalities              | Chromosomal abnormalities and abnormal gene carriers | Congenital, familial and genetic disorders     |
| Nodular regenerative hyperplasia                   | Hepatic fibrosis and cirrhosis                   | Hepatic and hepatobiliary disorders                  | Hepatobiliary disorders                        |
| Angiotensin converting enzyme inhibitor foetopathy | Chemically-induced congenital syndromes          | Congenital and hereditary disorders NEC              | Congenital, familial and genetic disorders     |
| Congenital dysfibrinogenaemia                      | Coagulation disorders congenital                 | Blood and lymphatic system disorders congenital      | Congenital, familial and genetic disorders     |
| Congenital hepatomegaly                            | Hepatobiliary abnormalities congenital           | Hepatobiliary disorders congenital                   | Congenital, familial and genetic disorders     |
| Congenital hydrocele renalis                       | Renal disorders congenital                       | Renal and urinary tract disorders congenital         | Congenital, familial and genetic disorders     |
| Hypermethionuria                                   | Inborn errors of amino acid metabolism           | Metabolic and nutritional disorders congenital       | Congenital, familial and genetic disorders     |

|                                    |                                                                                  |                                                            |                                            |
|------------------------------------|----------------------------------------------------------------------------------|------------------------------------------------------------|--------------------------------------------|
| Hypermethioninaemia                | Inborn errors of amino acid metabolism                                           | Metabolic and nutritional disorders congenital             | Congenital, familial and genetic disorders |
| Adrenoleukodystrophy               | Cerebral disorders congenital                                                    | Neurological disorders congenital                          | Congenital, familial and genetic disorders |
| Protein S deficiency               | Coagulation disorders congenital                                                 | Blood and lymphatic system disorders congenital            | Congenital, familial and genetic disorders |
| Protein C deficiency               | Coagulation disorders congenital                                                 | Blood and lymphatic system disorders congenital            | Congenital, familial and genetic disorders |
| B-lymphocyte count decreased       | White blood cell analyses                                                        | Haematology investigations (incl blood groups)             | Investigations                             |
| Congenital hypoparathyroidism      | Endocrine disorders congenital NEC                                               | Endocrine disorders congenital                             | Congenital, familial and genetic disorders |
| T-lymphocyte count decreased       | White blood cell analyses                                                        | Haematology investigations (incl blood groups)             | Investigations                             |
| Mitochondrial DNA deletion         | Genetic mitochondrial abnormalities NEC                                          | Cytoplasmic disorders congenital                           | Congenital, familial and genetic disorders |
| Foetal warfarin syndrome           | Chemically-induced congenital syndromes                                          | Congenital and hereditary disorders NEC                    | Congenital, familial and genetic disorders |
| Klippel-Trenaunay syndrome         | Vascular anomalies congenital NEC                                                | Cardiac and vascular disorders congenital                  | Congenital, familial and genetic disorders |
| Mandibulofacial dysostosis         | Musculoskeletal and connective tissue disorders of face, neck and jaw congenital | Musculoskeletal and connective tissue disorders congenital | Congenital, familial and genetic disorders |
| Congenital multiplex arthrogyrosis | Musculoskeletal disorders congenital NEC                                         | Musculoskeletal and connective tissue disorders congenital | Congenital, familial and genetic disorders |
| Idiopathic neutropenia             | Neutropenias                                                                     | White blood cell disorders                                 | Blood and lymphatic system disorders       |
| Haemophilia carrier                | Abnormal gene carriers                                                           | Chromosomal abnormalities and abnormal gene carriers       | Congenital, familial and genetic disorders |

|                                  |                                                                                  |                                                            |                                            |
|----------------------------------|----------------------------------------------------------------------------------|------------------------------------------------------------|--------------------------------------------|
| Lipid proteinosis                | Inborn errors of lipid metabolism                                                | Metabolic and nutritional disorders congenital             | Congenital, familial and genetic disorders |
| Pachydermoperiostosis            | Non-site specific bone disorders congenital                                      | Musculoskeletal and connective tissue disorders congenital | Congenital, familial and genetic disorders |
| Oculocerebrorenal syndrome       | Renal disorders congenital                                                       | Renal and urinary tract disorders congenital               | Congenital, familial and genetic disorders |
| Bone marrow toxicity             | Marrow depression and hypoplastic anaemias                                       | Anaemias nonhaemolytic and marrow depression               | Blood and lymphatic system disorders       |
| Factor XII deficiency            | Coagulation disorders congenital                                                 | Blood and lymphatic system disorders congenital            | Congenital, familial and genetic disorders |
| Tangier disease                  | Inborn errors of lipid metabolism                                                | Metabolic and nutritional disorders congenital             | Congenital, familial and genetic disorders |
| Benign congenital hypotonia      | Non-site specific muscle disorders congenital                                    | Musculoskeletal and connective tissue disorders congenital | Congenital, familial and genetic disorders |
| Oculoauriculovertebral dysplasia | Musculoskeletal and connective tissue disorders of skull congenital              | Musculoskeletal and connective tissue disorders congenital | Congenital, familial and genetic disorders |
| Scimitar syndrome                | Venous disorders congenital                                                      | Cardiac and vascular disorders congenital                  | Congenital, familial and genetic disorders |
| Trichorhinophalangeal syndrome   | Musculoskeletal disorders congenital NEC                                         | Musculoskeletal and connective tissue disorders congenital | Congenital, familial and genetic disorders |
| Pterygium colli                  | Musculoskeletal and connective tissue disorders of face, neck and jaw congenital | Musculoskeletal and connective tissue disorders congenital | Congenital, familial and genetic disorders |
| Albright's disease               | Non-site specific bone disorders congenital                                      | Musculoskeletal and connective tissue disorders congenital | Congenital, familial and genetic disorders |
| Neural tube defect               | Central nervous system disorders congenital NEC                                  | Neurological disorders congenital                          | Congenital, familial and genetic disorders |
| Oculopharyngeal dystrophy        | Autosomal chromosomal abnormalities                                              | Chromosomal abnormalities and abnormal gene carriers       | Congenital, familial and genetic disorders |

|                                      |                                                       |                                                   |                                                 |
|--------------------------------------|-------------------------------------------------------|---------------------------------------------------|-------------------------------------------------|
| Infantile genetic agranulocytosis    | Haematological disorders congenital NEC               | Blood and lymphatic system disorders congenital   | Congenital, familial and genetic disorders      |
| Basophil percentage decreased        | White blood cell analyses                             | Haematology investigations (incl blood groups)    | Investigations                                  |
| Eosinophil percentage decreased      | White blood cell analyses                             | Haematology investigations (incl blood groups)    | Investigations                                  |
| Neutrophil percentage decreased      | White blood cell analyses                             | Haematology investigations (incl blood groups)    | Investigations                                  |
| Myeloblast percentage decreased      | White blood cell analyses                             | Haematology investigations (incl blood groups)    | Investigations                                  |
| Myelocyte percentage decreased       | White blood cell analyses                             | Haematology investigations (incl blood groups)    | Investigations                                  |
| Monocyte percentage decreased        | White blood cell analyses                             | Haematology investigations (incl blood groups)    | Investigations                                  |
| Lymphocyte percentage decreased      | White blood cell analyses                             | Haematology investigations (incl blood groups)    | Investigations                                  |
| Cerebral atrophy congenital          | Cerebral disorders congenital                         | Neurological disorders congenital                 | Congenital, familial and genetic disorders      |
| Hepatopulmonary syndrome             | Vascular pulmonary disorders NEC                      | Pulmonary vascular disorders                      | Respiratory, thoracic and mediastinal disorders |
| Renal and liver transplant           | Therapeutic procedures NEC                            | Therapeutic procedures and supportive care NEC    | Surgical and medical procedures                 |
| Liver and small intestine transplant | Therapeutic procedures NEC                            | Therapeutic procedures and supportive care NEC    | Surgical and medical procedures                 |
| Myocardial bridging                  | Cardiac disorders congenital NEC                      | Cardiac and vascular disorders congenital         | Congenital, familial and genetic disorders      |
| Keratolysis exfoliativa congenital   | Skin and subcutaneous tissue disorders congenital NEC | Skin and subcutaneous tissue disorders congenital | Congenital, familial and genetic disorders      |

|                                            |                                                       |                                                            |                                            |
|--------------------------------------------|-------------------------------------------------------|------------------------------------------------------------|--------------------------------------------|
| Kaufman-McKusick syndrome                  | Congenital disorders NEC                              | Congenital and hereditary disorders NEC                    | Congenital, familial and genetic disorders |
| Liddle's syndrome                          | Renal disorders congenital                            | Renal and urinary tract disorders congenital               | Congenital, familial and genetic disorders |
| Ornithine transcarbamoylase deficiency     | Inborn errors of amino acid metabolism                | Metabolic and nutritional disorders congenital             | Congenital, familial and genetic disorders |
| Osteoporosis-pseudoglioma syndrome         | Non-site specific bone disorders congenital           | Musculoskeletal and connective tissue disorders congenital | Congenital, familial and genetic disorders |
| Congenital poikiloderma                    | Skin and subcutaneous tissue disorders congenital NEC | Skin and subcutaneous tissue disorders congenital          | Congenital, familial and genetic disorders |
| Factor III deficiency                      | Coagulation disorders congenital                      | Blood and lymphatic system disorders congenital            | Congenital, familial and genetic disorders |
| Factor X deficiency                        | Coagulation disorders congenital                      | Blood and lymphatic system disorders congenital            | Congenital, familial and genetic disorders |
| Dihydropyrimidine dehydrogenase deficiency | Pyrimidine metabolism disorders congenital            | Metabolic and nutritional disorders congenital             | Congenital, familial and genetic disorders |
| Mitochondrial DNA duplication              | Genetic mitochondrial abnormalities NEC               | Cytoplasmic disorders congenital                           | Congenital, familial and genetic disorders |
| Mitochondrial DNA mutation                 | Genetic mitochondrial abnormalities NEC               | Cytoplasmic disorders congenital                           | Congenital, familial and genetic disorders |
| Iris coloboma                              | Iris and choroid disorders congenital                 | Eye disorders congenital                                   | Congenital, familial and genetic disorders |
| Retinal coloboma                           | Retinal disorders congenital                          | Eye disorders congenital                                   | Congenital, familial and genetic disorders |
| Congenital pulmonary valve atresia         | Cardiac valve disorders congenital                    | Cardiac and vascular disorders congenital                  | Congenital, familial and genetic disorders |
| Thymus hypoplasia                          | Immune system abnormalities congenital                | Immune system disorders congenital                         | Congenital, familial and genetic disorders |

|                                            |                                                                                  |                                                            |                                            |
|--------------------------------------------|----------------------------------------------------------------------------------|------------------------------------------------------------|--------------------------------------------|
| Cancer gene carrier                        | Abnormal gene carriers                                                           | Chromosomal abnormalities and abnormal gene carriers       | Congenital, familial and genetic disorders |
| Amyotrophic lateral sclerosis gene carrier | Abnormal gene carriers                                                           | Chromosomal abnormalities and abnormal gene carriers       | Congenital, familial and genetic disorders |
| Duchenne muscular dystrophy gene carrier   | Abnormal gene carriers                                                           | Chromosomal abnormalities and abnormal gene carriers       | Congenital, familial and genetic disorders |
| Cystic fibrosis carrier                    | Abnormal gene carriers                                                           | Chromosomal abnormalities and abnormal gene carriers       | Congenital, familial and genetic disorders |
| Fragile X carrier                          | Abnormal gene carriers                                                           | Chromosomal abnormalities and abnormal gene carriers       | Congenital, familial and genetic disorders |
| Macrognathia                               | Musculoskeletal and connective tissue disorders of face, neck and jaw congenital | Musculoskeletal and connective tissue disorders congenital | Congenital, familial and genetic disorders |
| Accessory liver lobe                       | Hepatobiliary abnormalities congenital                                           | Hepatobiliary disorders congenital                         | Congenital, familial and genetic disorders |
| Oroticaciduria congenital                  | Pyrimidine metabolism disorders congenital                                       | Metabolic and nutritional disorders congenital             | Congenital, familial and genetic disorders |
| Congenital aplastic anaemia                | Anaemias congenital (excl haemoglobinopathies)                                   | Blood and lymphatic system disorders congenital            | Congenital, familial and genetic disorders |
| Olfacto genital dysplasia                  | Endocrine disorders congenital NEC                                               | Endocrine disorders congenital                             | Congenital, familial and genetic disorders |
| Hydroxyprolinaemia                         | Inborn errors of amino acid metabolism                                           | Metabolic and nutritional disorders congenital             | Congenital, familial and genetic disorders |
| Congenital floppy infant                   | Non-site specific muscle disorders congenital                                    | Musculoskeletal and connective tissue disorders congenital | Congenital, familial and genetic disorders |
| Cyclic neutropenia                         | Neutropenias                                                                     | White blood cell disorders                                 | Blood and lymphatic system disorders       |
| Glycogen storage disease type II           | Inborn errors of carbohydrate metabolism (excl glucose)                          | Metabolic and nutritional disorders congenital             | Congenital, familial and genetic disorders |

|                                             |                                                         |                                                   |                                            |
|---------------------------------------------|---------------------------------------------------------|---------------------------------------------------|--------------------------------------------|
| Posterior segment of eye anomaly congenital | Anterior and posterior chamber disorders congenital     | Eye disorders congenital                          | Congenital, familial and genetic disorders |
| Febrile bone marrow aplasia                 | Marrow depression and hypoplastic anaemias              | Anaemias nonhaemolytic and marrow depression      | Blood and lymphatic system disorders       |
| Haemoglobin E disease                       | Haemoglobinopathies congenital                          | Blood and lymphatic system disorders congenital   | Congenital, familial and genetic disorders |
| Non-alcoholic steatohepatitis               | Hepatocellular damage and hepatitis NEC                 | Hepatic and hepatobiliary disorders               | Hepatobiliary disorders                    |
| Glycogen storage disease type VI            | Inborn errors of carbohydrate metabolism (excl glucose) | Metabolic and nutritional disorders congenital    | Congenital, familial and genetic disorders |
| Glycogen storage disease type VII           | Inborn errors of carbohydrate metabolism (excl glucose) | Metabolic and nutritional disorders congenital    | Congenital, familial and genetic disorders |
| Glycogen storage disease type VIII          | Inborn errors of carbohydrate metabolism (excl glucose) | Metabolic and nutritional disorders congenital    | Congenital, familial and genetic disorders |
| Hepatocellular foamy cell syndrome          | Hepatocellular damage and hepatitis NEC                 | Hepatic and hepatobiliary disorders               | Hepatobiliary disorders                    |
| Glycogen storage disease type IV            | Inborn errors of carbohydrate metabolism (excl glucose) | Metabolic and nutritional disorders congenital    | Congenital, familial and genetic disorders |
| Glycogen storage disease type III           | Inborn errors of carbohydrate metabolism (excl glucose) | Metabolic and nutritional disorders congenital    | Congenital, familial and genetic disorders |
| Uvula aplasia                               | Oral cavity disorders congenital NEC                    | Gastrointestinal tract disorders congenital       | Congenital, familial and genetic disorders |
| Cleft uvula                                 | Oral cavity disorders congenital NEC                    | Gastrointestinal tract disorders congenital       | Congenital, familial and genetic disorders |
| Congenital generalised lipodystrophy        | Skin and subcutaneous tissue disorders congenital NEC   | Skin and subcutaneous tissue disorders congenital | Congenital, familial and genetic disorders |
| Hereditary stomatocytosis                   | Anaemias congenital (excl haemoglobinopathies)          | Blood and lymphatic system disorders congenital   | Congenital, familial and genetic disorders |
| Asplenia                                    | Lymphatic system disorders congenital                   | Blood and lymphatic system disorders              | Congenital, familial and genetic           |



|                               |                                                                     |                                                            |                                            |
|-------------------------------|---------------------------------------------------------------------|------------------------------------------------------------|--------------------------------------------|
|                               |                                                                     | congenital                                                 | disorders                                  |
| Cholangiectasis congenital    | Hepatobiliary abnormalities congenital                              | Hepatobiliary disorders congenital                         | Congenital, familial and genetic disorders |
| Brachycephaly                 | Musculoskeletal and connective tissue disorders of skull congenital | Musculoskeletal and connective tissue disorders congenital | Congenital, familial and genetic disorders |
| Cerebrohepatorenal syndrome   | Cerebral disorders congenital                                       | Neurological disorders congenital                          | Congenital, familial and genetic disorders |
| Wolman's disease              | Lysosomal storage disorders                                         | Metabolic and nutritional disorders congenital             | Congenital, familial and genetic disorders |
| B-lymphocyte abnormalities    | White blood cell abnormal findings NEC                              | White blood cell disorders                                 | Blood and lymphatic system disorders       |
| Vaginal hypoplasia            | Female reproductive tract disorders congenital                      | Reproductive tract and breast disorders congenital         | Congenital, familial and genetic disorders |
| Alagille syndrome             | Hepatobiliary abnormalities congenital                              | Hepatobiliary disorders congenital                         | Congenital, familial and genetic disorders |
| Trisomy 8                     | Autosomal chromosomal abnormalities                                 | Chromosomal abnormalities and abnormal gene carriers       | Congenital, familial and genetic disorders |
| MELAS syndrome                | Genetic mitochondrial abnormalities NEC                             | Cytoplasmic disorders congenital                           | Congenital, familial and genetic disorders |
| Congenital oculomotor apraxia | Ocular disorders congenital NEC                                     | Eye disorders congenital                                   | Congenital, familial and genetic disorders |
| Greig's syndrome              | Non-site specific muscle disorders congenital                       | Musculoskeletal and connective tissue disorders congenital | Congenital, familial and genetic disorders |
| Trisomy 18                    | Autosomal chromosomal abnormalities                                 | Chromosomal abnormalities and abnormal gene carriers       | Congenital, familial and genetic disorders |
| Trisomy 17                    | Autosomal chromosomal abnormalities                                 | Chromosomal abnormalities and abnormal gene carriers       | Congenital, familial and genetic disorders |

|                                        |                                                                     |                                                            |                                            |
|----------------------------------------|---------------------------------------------------------------------|------------------------------------------------------------|--------------------------------------------|
| Congenital syphilitic osteochondritis  | Bacterial infections congenital                                     | Infections and infestations congenital                     | Congenital, familial and genetic disorders |
| Dentinogenesis imperfecta              | Dental disorders congenital                                         | Gastrointestinal tract disorders congenital                | Congenital, familial and genetic disorders |
| Pilonidal cyst congenital              | Skin and subcutaneous tissue disorders congenital NEC               | Skin and subcutaneous tissue disorders congenital          | Congenital, familial and genetic disorders |
| Lafora's myoclonic epilepsy            | Neurological disorders congenital NEC                               | Neurological disorders congenital                          | Congenital, familial and genetic disorders |
| Congenital bowing of long bones        | Musculoskeletal and connective tissue disorders of limbs congenital | Musculoskeletal and connective tissue disorders congenital | Congenital, familial and genetic disorders |
| Clostridium difficile sepsis           | Clostridia infections                                               | Bacterial infectious disorders                             | Infections and infestations                |
| Congenital aural fistula               | External ear disorders congenital                                   | Ear and labyrinthine disorders congenital                  | Congenital, familial and genetic disorders |
| Clostridium difficile infection        | Clostridia infections                                               | Bacterial infectious disorders                             | Infections and infestations                |
| Lymphangiectasia intestinal congenital | Lymphatic system disorders congenital                               | Blood and lymphatic system disorders congenital            | Congenital, familial and genetic disorders |
| External auditory canal atresia        | External ear disorders congenital                                   | Ear and labyrinthine disorders congenital                  | Congenital, familial and genetic disorders |
| Phalangeal agenesis                    | Musculoskeletal and connective tissue disorders of limbs congenital | Musculoskeletal and connective tissue disorders congenital | Congenital, familial and genetic disorders |
| Fibula agenesis                        | Musculoskeletal and connective tissue disorders of limbs congenital | Musculoskeletal and connective tissue disorders congenital | Congenital, familial and genetic disorders |
| Baltic myoclonic epilepsy              | Neurological disorders congenital NEC                               | Neurological disorders congenital                          | Congenital, familial and genetic disorders |
| Aicardi's syndrome                     | Neurological disorders congenital NEC                               | Neurological disorders congenital                          | Congenital, familial and genetic disorders |
| Tracheal atresia                       | Laryngeal and tracheal disorders congenital                         | Respiratory disorders congenital                           | Congenital, familial and genetic           |

|                                                     |                                                 |                                                    |                                            |
|-----------------------------------------------------|-------------------------------------------------|----------------------------------------------------|--------------------------------------------|
|                                                     |                                                 |                                                    | disorders                                  |
| Hypodontia                                          | Dental disorders congenital                     | Gastrointestinal tract disorders congenital        | Congenital, familial and genetic disorders |
| Haemoglobin D disease                               | Haemoglobinopathies congenital                  | Blood and lymphatic system disorders congenital    | Congenital, familial and genetic disorders |
| Haemoglobin D trait                                 | Haemoglobinopathies congenital                  | Blood and lymphatic system disorders congenital    | Congenital, familial and genetic disorders |
| Haemoglobin C trait                                 | Haemoglobinopathies congenital                  | Blood and lymphatic system disorders congenital    | Congenital, familial and genetic disorders |
| Anorectal agenesis                                  | Anorectal disorders congenital                  | Gastrointestinal tract disorders congenital        | Congenital, familial and genetic disorders |
| Androgen insensitivity syndrome                     | Reproductive tract disorders congenital NEC     | Reproductive tract and breast disorders congenital | Congenital, familial and genetic disorders |
| Holoprosencephaly                                   | Cerebral disorders congenital                   | Neurological disorders congenital                  | Congenital, familial and genetic disorders |
| De Lange's syndrome                                 | Central nervous system disorders congenital NEC | Neurological disorders congenital                  | Congenital, familial and genetic disorders |
| Blood incompatibility haemolytic anaemia of newborn | Anaemias congenital (excl haemoglobinopathies)  | Blood and lymphatic system disorders congenital    | Congenital, familial and genetic disorders |
| Congenital ureterocele                              | Ureteric disorders congenital                   | Renal and urinary tract disorders congenital       | Congenital, familial and genetic disorders |
| Cerebral dysgenesis                                 | Cerebral disorders congenital                   | Neurological disorders congenital                  | Congenital, familial and genetic disorders |
| Haemophilia A without inhibitors                    | Coagulation disorders congenital                | Blood and lymphatic system disorders congenital    | Congenital, familial and genetic disorders |
| Haemophilia B without inhibitors                    | Coagulation disorders congenital                | Blood and lymphatic system disorders congenital    | Congenital, familial and genetic disorders |

|                                          |                                                                     |                                                            |                                            |
|------------------------------------------|---------------------------------------------------------------------|------------------------------------------------------------|--------------------------------------------|
| Congenital epiblepharon                  | Eyelid disorders congenital                                         | Eye disorders congenital                                   | Congenital, familial and genetic disorders |
| Congenital hepatic fibrosis              | Hepatobiliary abnormalities congenital                              | Hepatobiliary disorders congenital                         | Congenital, familial and genetic disorders |
| X-linked chromosomal disorder            | Sex chromosomal abnormalities                                       | Chromosomal abnormalities and abnormal gene carriers       | Congenital, familial and genetic disorders |
| Y-linked chromosomal disorder            | Sex chromosomal abnormalities                                       | Chromosomal abnormalities and abnormal gene carriers       | Congenital, familial and genetic disorders |
| Bladder agenesis                         | Bladder disorders congenital                                        | Renal and urinary tract disorders congenital               | Congenital, familial and genetic disorders |
| Sacral hypoplasia                        | Musculoskeletal and connective tissue disorders of spine congenital | Musculoskeletal and connective tissue disorders congenital | Congenital, familial and genetic disorders |
| Laurence-Moon-Bardet-Biedl syndrome      | Neurological disorders congenital NEC                               | Neurological disorders congenital                          | Congenital, familial and genetic disorders |
| Dermatofibrosis lenticularis disseminata | Non-site specific bone disorders congenital                         | Musculoskeletal and connective tissue disorders congenital | Congenital, familial and genetic disorders |
| Mucopolysaccharidosis I                  | Lysosomal storage disorders                                         | Metabolic and nutritional disorders congenital             | Congenital, familial and genetic disorders |
| Mucopolysaccharidosis II                 | Lysosomal storage disorders                                         | Metabolic and nutritional disorders congenital             | Congenital, familial and genetic disorders |
| Mucopolysaccharidosis III                | Lysosomal storage disorders                                         | Metabolic and nutritional disorders congenital             | Congenital, familial and genetic disorders |
| Mucopolysaccharidosis V                  | Lysosomal storage disorders                                         | Metabolic and nutritional disorders congenital             | Congenital, familial and genetic disorders |
| Mucopolysaccharidosis VI                 | Lysosomal storage disorders                                         | Metabolic and nutritional disorders congenital             | Congenital, familial and genetic disorders |
| Mucopolysaccharidosis VII                | Lysosomal storage disorders                                         | Metabolic and nutritional disorders congenital             | Congenital, familial and genetic disorders |

|                                                                    |                                                                     |                                                            |                                            |
|--------------------------------------------------------------------|---------------------------------------------------------------------|------------------------------------------------------------|--------------------------------------------|
| XXX syndrome                                                       | Sex chromosomal abnormalities                                       | Chromosomal abnormalities and abnormal gene carriers       | Congenital, familial and genetic disorders |
| Subacute hepatic failure                                           | Hepatic failure and associated disorders                            | Hepatic and hepatobiliary disorders                        | Hepatobiliary disorders                    |
| Congenital ectopic pancreas                                        | Pancreatic disorders congenital                                     | Gastrointestinal tract disorders congenital                | Congenital, familial and genetic disorders |
| Congenital cutis laxa                                              | Connective tissue disorders congenital                              | Musculoskeletal and connective tissue disorders congenital | Congenital, familial and genetic disorders |
| Platybasia                                                         | Musculoskeletal and connective tissue disorders of skull congenital | Musculoskeletal and connective tissue disorders congenital | Congenital, familial and genetic disorders |
| T-lymphocyte count abnormal                                        | White blood cell analyses                                           | Haematology investigations (incl blood groups)             | Investigations                             |
| Choroidal coloboma                                                 | Iris and choroid disorders congenital                               | Eye disorders congenital                                   | Congenital, familial and genetic disorders |
| Congenital iris anomaly                                            | Iris and choroid disorders congenital                               | Eye disorders congenital                                   | Congenital, familial and genetic disorders |
| Microcornea                                                        | Corneal and scleral disorders congenital                            | Eye disorders congenital                                   | Congenital, familial and genetic disorders |
| Periodontal congenital anomaly                                     | Dental disorders congenital                                         | Gastrointestinal tract disorders congenital                | Congenital, familial and genetic disorders |
| Congenital calyceal diverticulum                                   | Renal disorders congenital                                          | Renal and urinary tract disorders congenital               | Congenital, familial and genetic disorders |
| Bone marrow myelogram abnormal                                     | Bone marrow and immune tissue imaging procedures                    | Haematology investigations (incl blood groups)             | Investigations                             |
| Chronic hepatic failure                                            | Hepatic failure and associated disorders                            | Hepatic and hepatobiliary disorders                        | Hepatobiliary disorders                    |
| Partial hypoxanthine-guanine phosphoribosyl transferase deficiency | Purine metabolism disorders congenital                              | Metabolic and nutritional disorders congenital             | Congenital, familial and genetic disorders |
| Total hypoxanthine-guanine phosphoribosyl transferase              | Purine metabolism disorders congenital                              | Metabolic and nutritional disorders                        | Congenital, familial and genetic           |

|                                       |                                                                                  |                                                            |                                            |
|---------------------------------------|----------------------------------------------------------------------------------|------------------------------------------------------------|--------------------------------------------|
| deficiency                            |                                                                                  | congenital                                                 | disorders                                  |
| Interferon gamma receptor deficiency  | Immune system abnormalities congenital                                           | Immune system disorders congenital                         | Congenital, familial and genetic disorders |
| Central core disease                  | Musculoskeletal and connective tissue disorders of limbs congenital              | Musculoskeletal and connective tissue disorders congenital | Congenital, familial and genetic disorders |
| Asphyxiating thoracic dystrophy       | Non-site specific cartilage disorders congenital                                 | Musculoskeletal and connective tissue disorders congenital | Congenital, familial and genetic disorders |
| Cyclopia                              | Musculoskeletal and connective tissue disorders of face, neck and jaw congenital | Musculoskeletal and connective tissue disorders congenital | Congenital, familial and genetic disorders |
| Encephalocutaneous angiomatosis       | Central nervous system disorders congenital NEC                                  | Neurological disorders congenital                          | Congenital, familial and genetic disorders |
| Spinocerebellar ataxia                | Cerebellar disorders congenital                                                  | Neurological disorders congenital                          | Congenital, familial and genetic disorders |
| Hypotelorism of orbit                 | Musculoskeletal and connective tissue disorders of face, neck and jaw congenital | Musculoskeletal and connective tissue disorders congenital | Congenital, familial and genetic disorders |
| Reproductive tract hypoplasia, male   | Male reproductive tract disorders congenital                                     | Reproductive tract and breast disorders congenital         | Congenital, familial and genetic disorders |
| Hereditary haemochromatosis           | Hepatobiliary abnormalities congenital                                           | Hepatobiliary disorders congenital                         | Congenital, familial and genetic disorders |
| Congenital choroidal anomaly          | Iris and choroid disorders congenital                                            | Eye disorders congenital                                   | Congenital, familial and genetic disorders |
| Band neutrophil count decreased       | White blood cell analyses                                                        | Haematology investigations (incl blood groups)             | Investigations                             |
| Congenital mitochondrial cytopathy    | Genetic mitochondrial abnormalities NEC                                          | Cytoplasmic disorders congenital                           | Congenital, familial and genetic disorders |
| Anomalous pulmonary venous connection | Venous disorders congenital                                                      | Cardiac and vascular disorders congenital                  | Congenital, familial and genetic disorders |

|                                           |                                                                                  |                                                            |                                            |
|-------------------------------------------|----------------------------------------------------------------------------------|------------------------------------------------------------|--------------------------------------------|
| Ocular icterus                            | Ocular disorders NEC                                                             | Eye disorders NEC                                          | Eye disorders                              |
| Otocephaly                                | Musculoskeletal and connective tissue disorders of face, neck and jaw congenital | Musculoskeletal and connective tissue disorders congenital | Congenital, familial and genetic disorders |
| Congenital aortic dilatation              | Great vessel disorders congenital                                                | Cardiac and vascular disorders congenital                  | Congenital, familial and genetic disorders |
| Branchiogenic syndrome                    | Musculoskeletal and connective tissue disorders of face, neck and jaw congenital | Musculoskeletal and connective tissue disorders congenital | Congenital, familial and genetic disorders |
| Hyperreflexia                             | Neurological disorders congenital NEC                                            | Neurological disorders congenital                          | Congenital, familial and genetic disorders |
| Factor V Leiden mutation                  | Coagulation disorders congenital                                                 | Blood and lymphatic system disorders congenital            | Congenital, familial and genetic disorders |
| Carbamoyl phosphate synthetase deficiency | Inborn errors of amino acid metabolism                                           | Metabolic and nutritional disorders congenital             | Congenital, familial and genetic disorders |
| Argininosuccinate synthetase deficiency   | Inborn errors of amino acid metabolism                                           | Metabolic and nutritional disorders congenital             | Congenital, familial and genetic disorders |
| Argininosuccinate lyase deficiency        | Inborn errors of amino acid metabolism                                           | Metabolic and nutritional disorders congenital             | Congenital, familial and genetic disorders |
| Lysinuric protein intolerance             | Inborn errors of amino acid metabolism                                           | Metabolic and nutritional disorders congenital             | Congenital, familial and genetic disorders |
| Clostridium colitis                       | Clostridia infections                                                            | Bacterial infectious disorders                             | Infections and infestations                |
| Hyperprolinaemia                          | Inborn errors of amino acid metabolism                                           | Metabolic and nutritional disorders congenital             | Congenital, familial and genetic disorders |
| Eisenmenger's syndrome                    | Cardiovascular disorders congenital NEC                                          | Cardiac and vascular disorders congenital                  | Congenital, familial and genetic disorders |
| Clinodactyly                              | Musculoskeletal and connective tissue disorders of limbs congenital              | Musculoskeletal and connective tissue disorders congenital | Congenital, familial and genetic disorders |
| Monoblast count decreased                 | White blood cell analyses                                                        | Haematology investigations (incl blood)                    | Investigations                             |

|                                      |                                                 |                                                            |                                            |
|--------------------------------------|-------------------------------------------------|------------------------------------------------------------|--------------------------------------------|
|                                      |                                                 | groups)                                                    |                                            |
| Plasmablast count decreased          | White blood cell analyses                       | Haematology investigations (incl blood groups)             | Investigations                             |
| Mitochondrial encephalomyopathy      | Genetic mitochondrial abnormalities NEC         | Cytoplasmic disorders congenital                           | Congenital, familial and genetic disorders |
| Bone marrow necrosis                 | Haematological disorders                        | Haematological disorders NEC                               | Blood and lymphatic system disorders       |
| Clostridium bacteraemia              | Clostridia infections                           | Bacterial infectious disorders                             | Infections and infestations                |
| Congenital thrombocyte disorder      | Coagulation disorders congenital                | Blood and lymphatic system disorders congenital            | Congenital, familial and genetic disorders |
| Nephritis autoimmune                 | Nephritis NEC                                   | Nephropathies                                              | Renal and urinary disorders                |
| Bicytopenia                          | Marrow depression and hypoplastic anaemias      | Anaemias nonhaemolytic and marrow depression               | Blood and lymphatic system disorders       |
| Rathke's cleft cyst                  | Central nervous system disorders congenital NEC | Neurological disorders congenital                          | Congenital, familial and genetic disorders |
| Diabetic foetopathy                  | Endocrine disorders congenital NEC              | Endocrine disorders congenital                             | Congenital, familial and genetic disorders |
| Becker's muscular dystrophy          | Non-site specific muscle disorders congenital   | Musculoskeletal and connective tissue disorders congenital | Congenital, familial and genetic disorders |
| Band neutrophil percentage decreased | White blood cell analyses                       | Haematology investigations (incl blood groups)             | Investigations                             |
| Congenital visual acuity reduced     | Ocular disorders congenital NEC                 | Eye disorders congenital                                   | Congenital, familial and genetic disorders |
| Congenital eye disorder              | Ocular disorders congenital NEC                 | Eye disorders congenital                                   | Congenital, familial and genetic disorders |
| Pulmonary sequestration              | Pulmonary and bronchial disorders congenital    | Respiratory disorders congenital                           | Congenital, familial and genetic disorders |



|                                      |                                                                     |                                                            |                                            |
|--------------------------------------|---------------------------------------------------------------------|------------------------------------------------------------|--------------------------------------------|
| Familial hypertriglyceridaemia       | Inborn errors of lipid metabolism                                   | Metabolic and nutritional disorders congenital             | Congenital, familial and genetic disorders |
| Anterior chamber cleavage syndrome   | Anterior and posterior chamber disorders congenital                 | Eye disorders congenital                                   | Congenital, familial and genetic disorders |
| Falot's pentalogy                    | Multiple cardiac abnormalities congenital                           | Cardiac and vascular disorders congenital                  | Congenital, familial and genetic disorders |
| Macrocornea                          | Corneal and scleral disorders congenital                            | Eye disorders congenital                                   | Congenital, familial and genetic disorders |
| Testicular dysplasia                 | Male reproductive tract disorders congenital                        | Reproductive tract and breast disorders congenital         | Congenital, familial and genetic disorders |
| Sarcosinaemia                        | Inborn errors of amino acid metabolism                              | Metabolic and nutritional disorders congenital             | Congenital, familial and genetic disorders |
| Caudal regression syndrome           | Musculoskeletal and connective tissue disorders of spine congenital | Musculoskeletal and connective tissue disorders congenital | Congenital, familial and genetic disorders |
| Mitochondrial DNA depletion          | Genetic mitochondrial abnormalities NEC                             | Cytoplasmic disorders congenital                           | Congenital, familial and genetic disorders |
| Platelet toxicity                    | Platelet disorders NEC                                              | Platelet disorders                                         | Blood and lymphatic system disorders       |
| Neutropenic infection                | Infections NEC                                                      | Infections - pathogen unspecified                          | Infections and infestations                |
| Congenital genital malformation male | Male reproductive tract disorders congenital                        | Reproductive tract and breast disorders congenital         | Congenital, familial and genetic disorders |
| Methylmalonic aciduria               | Inborn errors of amino acid metabolism                              | Metabolic and nutritional disorders congenital             | Congenital, familial and genetic disorders |
| Dubowitz syndrome                    | Musculoskeletal disorders congenital NEC                            | Musculoskeletal and connective tissue disorders congenital | Congenital, familial and genetic disorders |
| Preduodenal portal vein              | Venous disorders congenital                                         | Cardiac and vascular disorders congenital                  | Congenital, familial and genetic disorders |

|                                   |                                                |                                                    |                                            |
|-----------------------------------|------------------------------------------------|----------------------------------------------------|--------------------------------------------|
| Persistent urogenital sinus       | Reproductive tract disorders congenital NEC    | Reproductive tract and breast disorders congenital | Congenital, familial and genetic disorders |
| Bruton's agammaglobulinaemia      | Immune system abnormalities congenital         | Immune system disorders congenital                 | Congenital, familial and genetic disorders |
| Congenital nephrotic syndrome     | Renal disorders congenital                     | Renal and urinary tract disorders congenital       | Congenital, familial and genetic disorders |
| Congenital hypogammaglobulinaemia | Immune system abnormalities congenital         | Immune system disorders congenital                 | Congenital, familial and genetic disorders |
| Type I hyperlipidaemia            | Inborn errors of lipid metabolism              | Metabolic and nutritional disorders congenital     | Congenital, familial and genetic disorders |
| Type III hyperlipidaemia          | Inborn errors of lipid metabolism              | Metabolic and nutritional disorders congenital     | Congenital, familial and genetic disorders |
| Type IV hyperlipidaemia           | Inborn errors of lipid metabolism              | Metabolic and nutritional disorders congenital     | Congenital, familial and genetic disorders |
| Type V hyperlipidaemia            | Inborn errors of lipid metabolism              | Metabolic and nutritional disorders congenital     | Congenital, familial and genetic disorders |
| Laryngomalacia                    | Laryngeal and tracheal disorders congenital    | Respiratory disorders congenital                   | Congenital, familial and genetic disorders |
| Hollow visceral myopathy          | Intestinal disorders congenital                | Gastrointestinal tract disorders congenital        | Congenital, familial and genetic disorders |
| Benign familial haematuria        | Renal disorders congenital                     | Renal and urinary tract disorders congenital       | Congenital, familial and genetic disorders |
| Haemoglobinopathy                 | Haemoglobinopathies congenital                 | Blood and lymphatic system disorders congenital    | Congenital, familial and genetic disorders |
| Hereditary haemolytic anaemia     | Anaemias congenital (excl haemoglobinopathies) | Blood and lymphatic system disorders congenital    | Congenital, familial and genetic disorders |
| Foetal malformation               | Congenital disorders NEC                       | Congenital and hereditary disorders NEC            | Congenital, familial and genetic disorders |

|                                         |                                                         |                                                      |                                            |
|-----------------------------------------|---------------------------------------------------------|------------------------------------------------------|--------------------------------------------|
| Anomaly of middle ear congenital        | Ear disorders congenital NEC                            | Ear and labyrinthine disorders congenital            | Congenital, familial and genetic disorders |
| Autosomal chromosome anomaly            | Autosomal chromosomal abnormalities                     | Chromosomal abnormalities and abnormal gene carriers | Congenital, familial and genetic disorders |
| Basophil count abnormal                 | White blood cell analyses                               | Haematology investigations (incl blood groups)       | Investigations                             |
| Carbohydrate metabolism disorder        | Inborn errors of carbohydrate metabolism (excl glucose) | Metabolic and nutritional disorders congenital       | Congenital, familial and genetic disorders |
| Clostridial infection                   | Clostridia infections                                   | Bacterial infectious disorders                       | Infections and infestations                |
| Eye anterior chamber congenital anomaly | Anterior and posterior chamber disorders congenital     | Eye disorders congenital                             | Congenital, familial and genetic disorders |
| Congenital aortic anomaly               | Great vessel disorders congenital                       | Cardiac and vascular disorders congenital            | Congenital, familial and genetic disorders |
| Congenital bladder anomaly              | Bladder disorders congenital                            | Renal and urinary tract disorders congenital         | Congenital, familial and genetic disorders |
| Congenital cardiovascular anomaly       | Cardiovascular disorders congenital NEC                 | Cardiac and vascular disorders congenital            | Congenital, familial and genetic disorders |
| Congenital corneal anomaly              | Corneal and scleral disorders congenital                | Eye disorders congenital                             | Congenital, familial and genetic disorders |
| Congenital coronary artery malformation | Arterial disorders congenital                           | Cardiac and vascular disorders congenital            | Congenital, familial and genetic disorders |
| Congenital diaphragmatic anomaly        | Diaphragmatic disorders congenital                      | Respiratory disorders congenital                     | Congenital, familial and genetic disorders |
| Congenital fallopian tube anomaly       | Female reproductive tract disorders congenital          | Reproductive tract and breast disorders congenital   | Congenital, familial and genetic disorders |
| Congenital gastric anomaly              | Gastric disorders congenital                            | Gastrointestinal tract disorders congenital          | Congenital, familial and genetic disorders |

|                                     |                                                                     |                                                            |                                            |
|-------------------------------------|---------------------------------------------------------------------|------------------------------------------------------------|--------------------------------------------|
| Congenital hair disorder            | Hair and nail disorders congenital                                  | Skin and subcutaneous tissue disorders congenital          | Congenital, familial and genetic disorders |
| Congenital hepatobiliary anomaly    | Hepatobiliary abnormalities congenital                              | Hepatobiliary disorders congenital                         | Congenital, familial and genetic disorders |
| Congenital intestinal malformation  | Intestinal disorders congenital                                     | Gastrointestinal tract disorders congenital                | Congenital, familial and genetic disorders |
| Congenital knee deformity           | Musculoskeletal and connective tissue disorders of limbs congenital | Musculoskeletal and connective tissue disorders congenital | Congenital, familial and genetic disorders |
| Congenital oesophageal anomaly      | Oesophageal disorders congenital                                    | Gastrointestinal tract disorders congenital                | Congenital, familial and genetic disorders |
| Congenital oral malformation        | Oral cavity disorders congenital NEC                                | Gastrointestinal tract disorders congenital                | Congenital, familial and genetic disorders |
| Congenital ovarian anomaly          | Female reproductive tract disorders congenital                      | Reproductive tract and breast disorders congenital         | Congenital, familial and genetic disorders |
| Congenital pancreatic anomaly       | Pancreatic disorders congenital                                     | Gastrointestinal tract disorders congenital                | Congenital, familial and genetic disorders |
| Congenital pharyngeal anomaly       | Pharyngeal disorders congenital                                     | Respiratory disorders congenital                           | Congenital, familial and genetic disorders |
| Congenital pulmonary artery anomaly | Arterial disorders congenital                                       | Cardiac and vascular disorders congenital                  | Congenital, familial and genetic disorders |
| Congenital pulmonary valve disorder | Cardiac valve disorders congenital                                  | Cardiac and vascular disorders congenital                  | Congenital, familial and genetic disorders |
| Congenital spinal cord anomaly      | Central nervous system disorders congenital NEC                     | Neurological disorders congenital                          | Congenital, familial and genetic disorders |
| Congenital tongue anomaly           | Tongue disorders congenital                                         | Gastrointestinal tract disorders congenital                | Congenital, familial and genetic disorders |
| Congenital ureteric anomaly         | Ureteric disorders congenital                                       | Renal and urinary tract disorders congenital               | Congenital, familial and genetic disorders |

|                                      |                                                     |                                                    |                                            |
|--------------------------------------|-----------------------------------------------------|----------------------------------------------------|--------------------------------------------|
| Congenital uterine anomaly           | Female reproductive tract disorders congenital      | Reproductive tract and breast disorders congenital | Congenital, familial and genetic disorders |
| Congenital great vessel anomaly      | Great vessel disorders congenital                   | Cardiac and vascular disorders congenital          | Congenital, familial and genetic disorders |
| Congenital vitreous anomaly          | Anterior and posterior chamber disorders congenital | Eye disorders congenital                           | Congenital, familial and genetic disorders |
| Congenital white blood cell disorder | Haematological disorders congenital NEC             | Blood and lymphatic system disorders congenital    | Congenital, familial and genetic disorders |
| Eosinophil count abnormal            | White blood cell analyses                           | Haematology investigations (incl blood groups)     | Investigations                             |
| Congenital eyelid malformation       | Eyelid disorders congenital                         | Eye disorders congenital                           | Congenital, familial and genetic disorders |
| Gallbladder anomaly congenital       | Hepatobiliary abnormalities congenital              | Hepatobiliary disorders congenital                 | Congenital, familial and genetic disorders |
| Haematotoxicity                      | Haematological disorders                            | Haematological disorders NEC                       | Blood and lymphatic system disorders       |
| Hereditary cerebral degeneration     | Cerebral disorders congenital                       | Neurological disorders congenital                  | Congenital, familial and genetic disorders |
| Hereditary disorder                  | Congenital disorders NEC                            | Congenital and hereditary disorders NEC            | Congenital, familial and genetic disorders |
| Monocyte count abnormal              | White blood cell analyses                           | Haematology investigations (incl blood groups)     | Investigations                             |
| Neutrophil count abnormal            | White blood cell analyses                           | Haematology investigations (incl blood groups)     | Investigations                             |
| Porphyryn metabolism disorder        | Inborn errors of porphyryn metabolism               | Metabolic and nutritional disorders congenital     | Congenital, familial and genetic disorders |
| White blood cell disorder            | White blood cell abnormal findings NEC              | White blood cell disorders                         | Blood and lymphatic system disorders       |

|                                      |                                                       |                                                            |                                            |
|--------------------------------------|-------------------------------------------------------|------------------------------------------------------------|--------------------------------------------|
| Dermatoglyphic anomaly               | Skin and subcutaneous tissue disorders congenital NEC | Skin and subcutaneous tissue disorders congenital          | Congenital, familial and genetic disorders |
| Sex chromosome abnormality           | Sex chromosomal abnormalities                         | Chromosomal abnormalities and abnormal gene carriers       | Congenital, familial and genetic disorders |
| Congenital optic nerve anomaly       | Optic nerve and optic disc disorders congenital       | Eye disorders congenital                                   | Congenital, familial and genetic disorders |
| Congenital scleral disorder          | Corneal and scleral disorders congenital              | Eye disorders congenital                                   | Congenital, familial and genetic disorders |
| Congenital pseudarthrosis            | Non-site specific bone disorders congenital           | Musculoskeletal and connective tissue disorders congenital | Congenital, familial and genetic disorders |
| Telangiectasia congenital            | Skin and subcutaneous tissue disorders congenital NEC | Skin and subcutaneous tissue disorders congenital          | Congenital, familial and genetic disorders |
| Blood disorder                       | Haematological disorders                              | Haematological disorders NEC                               | Blood and lymphatic system disorders       |
| Gastrointestinal malformation        | Gastrointestinal tract disorders congenital NEC       | Gastrointestinal tract disorders congenital                | Congenital, familial and genetic disorders |
| Adrenogenital syndrome               | Adrenal disorders congenital                          | Endocrine disorders congenital                             | Congenital, familial and genetic disorders |
| Asymptomatic gene carrier            | Abnormal gene carriers                                | Chromosomal abnormalities and abnormal gene carriers       | Congenital, familial and genetic disorders |
| Bone marrow disorder                 | Haematological disorders                              | Haematological disorders NEC                               | Blood and lymphatic system disorders       |
| Chromosomal deletion                 | Chromosomal abnormalities NEC                         | Chromosomal abnormalities and abnormal gene carriers       | Congenital, familial and genetic disorders |
| Chromosomal mutation                 | Chromosomal abnormalities NEC                         | Chromosomal abnormalities and abnormal gene carriers       | Congenital, familial and genetic disorders |
| Gastrointestinal disorder congenital | Gastrointestinal tract disorders congenital NEC       | Gastrointestinal tract disorders congenital                | Congenital, familial and genetic disorders |

|                                      |                                                          |                                                            |                                            |
|--------------------------------------|----------------------------------------------------------|------------------------------------------------------------|--------------------------------------------|
| Glycogen storage disorder            | Inborn errors of carbohydrate metabolism (excl glucose)  | Metabolic and nutritional disorders congenital             | Congenital, familial and genetic disorders |
| Haemophilia                          | Coagulation disorders congenital                         | Blood and lymphatic system disorders congenital            | Congenital, familial and genetic disorders |
| Hepatic lesion                       | Hepatic and hepatobiliary disorders NEC                  | Hepatic and hepatobiliary disorders                        | Hepatobiliary disorders                    |
| Inborn error of bilirubin metabolism | Inborn errors of bilirubin metabolism                    | Metabolic and nutritional disorders congenital             | Congenital, familial and genetic disorders |
| Inborn error of metabolism           | Inborn errors of metabolism NEC                          | Metabolic and nutritional disorders congenital             | Congenital, familial and genetic disorders |
| Intestinal atresia                   | Intestinal disorders congenital                          | Gastrointestinal tract disorders congenital                | Congenital, familial and genetic disorders |
| Liver operation                      | Hepatic therapeutic procedures                           | Hepatobiliary therapeutic procedures                       | Surgical and medical procedures            |
| Plasma cell disorder                 | White blood cell abnormal findings NEC                   | White blood cell disorders                                 | Blood and lymphatic system disorders       |
| Septum pellucidum agenesis           | Cerebral disorders congenital                            | Neurological disorders congenital                          | Congenital, familial and genetic disorders |
| Silver-Russell syndrome              | Musculoskeletal disorders congenital NEC                 | Musculoskeletal and connective tissue disorders congenital | Congenital, familial and genetic disorders |
| Congenital arterial malformation     | Arterial disorders congenital                            | Cardiac and vascular disorders congenital                  | Congenital, familial and genetic disorders |
| Congenital endocrine anomaly         | Endocrine disorders congenital NEC                       | Endocrine disorders congenital                             | Congenital, familial and genetic disorders |
| Congenital epiglottal anomaly        | Laryngeal and tracheal disorders congenital              | Respiratory disorders congenital                           | Congenital, familial and genetic disorders |
| Congenital Eustachian tube anomaly   | Ear disorders congenital NEC                             | Ear and labyrinthine disorders congenital                  | Congenital, familial and genetic disorders |
| Congenital foot malformation         | Musculoskeletal and connective tissue disorders of limbs | Musculoskeletal and connective tissue                      | Congenital, familial and genetic           |

|                                            |                                                                                  |                                                            |                                            |
|--------------------------------------------|----------------------------------------------------------------------------------|------------------------------------------------------------|--------------------------------------------|
|                                            | congenital                                                                       | disorders congenital                                       | disorders                                  |
| Congenital genital malformation            | Reproductive tract disorders congenital NEC                                      | Reproductive tract and breast disorders congenital         | Congenital, familial and genetic disorders |
| Congenital genitourinary abnormality       | Renal and urinary tract disorders congenital NEC                                 | Renal and urinary tract disorders congenital               | Congenital, familial and genetic disorders |
| Congenital hand malformation               | Musculoskeletal and connective tissue disorders of limbs congenital              | Musculoskeletal and connective tissue disorders congenital | Congenital, familial and genetic disorders |
| Congenital jaw malformation                | Musculoskeletal and connective tissue disorders of face, neck and jaw congenital | Musculoskeletal and connective tissue disorders congenital | Congenital, familial and genetic disorders |
| Congenital joint malformation              | Musculoskeletal disorders congenital NEC                                         | Musculoskeletal and connective tissue disorders congenital | Congenital, familial and genetic disorders |
| Congenital lacrimal passage anomaly        | Lacrimal system disorders congenital                                             | Eye disorders congenital                                   | Congenital, familial and genetic disorders |
| Anomaly of external ear congenital         | External ear disorders congenital                                                | Ear and labyrinthine disorders congenital                  | Congenital, familial and genetic disorders |
| Congenital anomaly of inner ear            | Ear disorders congenital NEC                                                     | Ear and labyrinthine disorders congenital                  | Congenital, familial and genetic disorders |
| Congenital anomaly of adrenal gland        | Adrenal disorders congenital                                                     | Endocrine disorders congenital                             | Congenital, familial and genetic disorders |
| Congenital gastrointestinal vessel anomaly | Vascular anomalies congenital NEC                                                | Cardiac and vascular disorders congenital                  | Congenital, familial and genetic disorders |
| Congenital infection                       | Infections congenital NEC                                                        | Infections and infestations congenital                     | Congenital, familial and genetic disorders |
| Congenital musculoskeletal anomaly         | Musculoskeletal disorders congenital NEC                                         | Musculoskeletal and connective tissue disorders congenital | Congenital, familial and genetic disorders |
| Congenital neurological disorder           | Neurological disorders congenital NEC                                            | Neurological disorders congenital                          | Congenital, familial and genetic disorders |



|                                 |                                                                     |                                                            |                                            |
|---------------------------------|---------------------------------------------------------------------|------------------------------------------------------------|--------------------------------------------|
| Congenital neuropathy           | Peripheral nervous system disorders congenital NEC                  | Neurological disorders congenital                          | Congenital, familial and genetic disorders |
| Congenital nose malformation    | Nasal disorders congenital                                          | Respiratory disorders congenital                           | Congenital, familial and genetic disorders |
| Skull malformation              | Musculoskeletal and connective tissue disorders of skull congenital | Musculoskeletal and connective tissue disorders congenital | Congenital, familial and genetic disorders |
| Congenital urethral anomaly     | Renal and urinary tract disorders congenital NEC                    | Renal and urinary tract disorders congenital               | Congenital, familial and genetic disorders |
| Spleen malformation             | Lymphatic system disorders congenital                               | Blood and lymphatic system disorders congenital            | Congenital, familial and genetic disorders |
| Congenital myopathy             | Non-site specific muscle disorders congenital                       | Musculoskeletal and connective tissue disorders congenital | Congenital, familial and genetic disorders |
| Lowry-Wood syndrome             | Musculoskeletal disorders congenital NEC                            | Musculoskeletal and connective tissue disorders congenital | Congenital, familial and genetic disorders |
| Accessory navicular syndrome    | Musculoskeletal and connective tissue disorders of limbs congenital | Musculoskeletal and connective tissue disorders congenital | Congenital, familial and genetic disorders |
| Pseudocholinesterase deficiency | Inborn errors of metabolism NEC                                     | Metabolic and nutritional disorders congenital             | Congenital, familial and genetic disorders |
| Arginase deficiency             | Inborn errors of amino acid metabolism                              | Metabolic and nutritional disorders congenital             | Congenital, familial and genetic disorders |
| Congenital carnitine deficiency | Inborn errors of lipid metabolism                                   | Metabolic and nutritional disorders congenital             | Congenital, familial and genetic disorders |
| Trisomy 15                      | Autosomal chromosomal abnormalities                                 | Chromosomal abnormalities and abnormal gene carriers       | Congenital, familial and genetic disorders |
| Congenital dyskeratosis         | Haematological disorders congenital NEC                             | Blood and lymphatic system disorders congenital            | Congenital, familial and genetic disorders |
| Stargardt's disease             | Retinal disorders congenital                                        | Eye disorders congenital                                   | Congenital, familial and genetic disorders |

|                                                   |                                                                     |                                                            |                                            |
|---------------------------------------------------|---------------------------------------------------------------------|------------------------------------------------------------|--------------------------------------------|
| Basal cell naevus syndrome                        | Skin and subcutaneous tissue disorders congenital NEC               | Skin and subcutaneous tissue disorders congenital          | Congenital, familial and genetic disorders |
| Multiple lentiginos syndrome                      | Skin and subcutaneous tissue disorders congenital NEC               | Skin and subcutaneous tissue disorders congenital          | Congenital, familial and genetic disorders |
| Gitelman's syndrome                               | Renal and urinary tract disorders congenital NEC                    | Renal and urinary tract disorders congenital               | Congenital, familial and genetic disorders |
| Netherton's syndrome                              | Skin and subcutaneous tissue disorders congenital NEC               | Skin and subcutaneous tissue disorders congenital          | Congenital, familial and genetic disorders |
| Haemoglobin E-thalassaemia disease                | Haemoglobinopathies congenital                                      | Blood and lymphatic system disorders congenital            | Congenital, familial and genetic disorders |
| Spondyloepiphyseal dysplasia                      | Musculoskeletal and connective tissue disorders of spine congenital | Musculoskeletal and connective tissue disorders congenital | Congenital, familial and genetic disorders |
| Mitochondrial hepatopathy                         | Genetic mitochondrial abnormalities NEC                             | Cytoplasmic disorders congenital                           | Congenital, familial and genetic disorders |
| Neuropathy, ataxia, retinitis pigmentosa syndrome | Genetic mitochondrial abnormalities NEC                             | Cytoplasmic disorders congenital                           | Congenital, familial and genetic disorders |
| Pearson's syndrome                                | Genetic mitochondrial abnormalities NEC                             | Cytoplasmic disorders congenital                           | Congenital, familial and genetic disorders |
| Optic nerve hypoplasia                            | Optic nerve and optic disc disorders congenital                     | Eye disorders congenital                                   | Congenital, familial and genetic disorders |
| Alpers' disease                                   | Genetic mitochondrial abnormalities NEC                             | Cytoplasmic disorders congenital                           | Congenital, familial and genetic disorders |
| Laryngo-onycho-cutaneous syndrome                 | Laryngeal and tracheal disorders congenital                         | Respiratory disorders congenital                           | Congenital, familial and genetic disorders |
| Kinematic imbalances due to suboccipital strain   | Non-site specific muscle disorders congenital                       | Musculoskeletal and connective tissue disorders congenital | Congenital, familial and genetic disorders |
| Ectopic kidney                                    | Renal disorders congenital                                          | Renal and urinary tract disorders congenital               | Congenital, familial and genetic disorders |

|                                |                                                                     |                                                            |                                            |
|--------------------------------|---------------------------------------------------------------------|------------------------------------------------------------|--------------------------------------------|
| Cryptogenic cirrhosis          | Hepatic fibrosis and cirrhosis                                      | Hepatic and hepatobiliary disorders                        | Hepatobiliary disorders                    |
| Uterine cervix hypoplasia      | Female reproductive tract disorders congenital                      | Reproductive tract and breast disorders congenital         | Congenital, familial and genetic disorders |
| Uterine hypoplasia             | Female reproductive tract disorders congenital                      | Reproductive tract and breast disorders congenital         | Congenital, familial and genetic disorders |
| Lymphocyte percentage abnormal | White blood cell analyses                                           | Haematology investigations (incl blood groups)             | Investigations                             |
| Wagner's disease               | Retinal disorders congenital                                        | Eye disorders congenital                                   | Congenital, familial and genetic disorders |
| Usher's syndrome               | Retinal disorders congenital                                        | Eye disorders congenital                                   | Congenital, familial and genetic disorders |
| Stickler's syndrome            | Retinal disorders congenital                                        | Eye disorders congenital                                   | Congenital, familial and genetic disorders |
| Lumbarisation                  | Musculoskeletal and connective tissue disorders of spine congenital | Musculoskeletal and connective tissue disorders congenital | Congenital, familial and genetic disorders |
| Aase syndrome                  | Musculoskeletal disorders congenital NEC                            | Musculoskeletal and connective tissue disorders congenital | Congenital, familial and genetic disorders |
| Nail-patella syndrome          | Musculoskeletal disorders congenital NEC                            | Musculoskeletal and connective tissue disorders congenital | Congenital, familial and genetic disorders |
| Tyrosinaemia                   | Inborn errors of amino acid metabolism                              | Metabolic and nutritional disorders congenital             | Congenital, familial and genetic disorders |
| Hereditary areflexic dystasia  | Central nervous system disorders congenital NEC                     | Neurological disorders congenital                          | Congenital, familial and genetic disorders |
| Congenital androgen deficiency | Endocrine disorders congenital NEC                                  | Endocrine disorders congenital                             | Congenital, familial and genetic disorders |
| Schinzel-Giedion syndrome      | Musculoskeletal disorders congenital NEC                            | Musculoskeletal and connective tissue disorders congenital | Congenital, familial and genetic disorders |

|                                 |                                                                     |                                                            |                                            |
|---------------------------------|---------------------------------------------------------------------|------------------------------------------------------------|--------------------------------------------|
| Congenital coagulopathy         | Coagulation disorders congenital                                    | Blood and lymphatic system disorders congenital            | Congenital, familial and genetic disorders |
| Testotoxicosis                  | Male reproductive tract disorders congenital                        | Reproductive tract and breast disorders congenital         | Congenital, familial and genetic disorders |
| Young's syndrome                | Congenital disorders NEC                                            | Congenital and hereditary disorders NEC                    | Congenital, familial and genetic disorders |
| Oculodentodigital dysplasia     | Musculoskeletal disorders congenital NEC                            | Musculoskeletal and connective tissue disorders congenital | Congenital, familial and genetic disorders |
| Congenital anomaly in offspring | Congenital disorders NEC                                            | Congenital and hereditary disorders NEC                    | Congenital, familial and genetic disorders |
| Bicuspid pulmonary valve        | Cardiac valve disorders congenital                                  | Cardiac and vascular disorders congenital                  | Congenital, familial and genetic disorders |
| Aorticopulmonary septal defect  | Vascular anomalies congenital NEC                                   | Cardiac and vascular disorders congenital                  | Congenital, familial and genetic disorders |
| Haemoglobin E trait             | Haemoglobinopathies congenital                                      | Blood and lymphatic system disorders congenital            | Congenital, familial and genetic disorders |
| Atrioventricular septal defect  | Cardiac septal defects congenital                                   | Cardiac and vascular disorders congenital                  | Congenital, familial and genetic disorders |
| Arachnodactyly                  | Musculoskeletal and connective tissue disorders of limbs congenital | Musculoskeletal and connective tissue disorders congenital | Congenital, familial and genetic disorders |
| Dolichocolon                    | Intestinal disorders congenital                                     | Gastrointestinal tract disorders congenital                | Congenital, familial and genetic disorders |
| Kabuki make-up syndrome         | Musculoskeletal disorders congenital NEC                            | Musculoskeletal and connective tissue disorders congenital | Congenital, familial and genetic disorders |
| Phytosterolaemia                | Inborn errors of lipid metabolism                                   | Metabolic and nutritional disorders congenital             | Congenital, familial and genetic disorders |
| Fallot's trilogy                | Multiple cardiac abnormalities congenital                           | Cardiac and vascular disorders congenital                  | Congenital, familial and genetic disorders |

|                                        |                                                                     |                                                            |                                            |
|----------------------------------------|---------------------------------------------------------------------|------------------------------------------------------------|--------------------------------------------|
| Cardiac septal defect                  | Cardiac septal defects congenital                                   | Cardiac and vascular disorders congenital                  | Congenital, familial and genetic disorders |
| Intestinal malrotation                 | Intestinal disorders congenital                                     | Gastrointestinal tract disorders congenital                | Congenital, familial and genetic disorders |
| Foetal chromosome abnormality          | Chromosomal abnormalities NEC                                       | Chromosomal abnormalities and abnormal gene carriers       | Congenital, familial and genetic disorders |
| CHARGE syndrome                        | Congenital disorders NEC                                            | Congenital and hereditary disorders NEC                    | Congenital, familial and genetic disorders |
| Congenital heart valve disorder        | Cardiac valve disorders congenital                                  | Cardiac and vascular disorders congenital                  | Congenital, familial and genetic disorders |
| Facioscapulohumeral muscular dystrophy | Non-site specific muscle disorders congenital                       | Musculoskeletal and connective tissue disorders congenital | Congenital, familial and genetic disorders |
| Amniotic band syndrome                 | Musculoskeletal and connective tissue disorders of limbs congenital | Musculoskeletal and connective tissue disorders congenital | Congenital, familial and genetic disorders |
| Foramen magnum stenosis                | Musculoskeletal and connective tissue disorders of skull congenital | Musculoskeletal and connective tissue disorders congenital | Congenital, familial and genetic disorders |
| Cholestatic pruritus                   | Pruritus NEC                                                        | Epidermal and dermal conditions                            | Skin and subcutaneous tissue disorders     |
| Parachute mitral valve                 | Cardiac valve disorders congenital                                  | Cardiac and vascular disorders congenital                  | Congenital, familial and genetic disorders |
| Persistent left superior vena cava     | Venous disorders congenital                                         | Cardiac and vascular disorders congenital                  | Congenital, familial and genetic disorders |
| Blood count abnormal                   | Blood counts NEC                                                    | Haematology investigations (incl blood groups)             | Investigations                             |
| Sotos' syndrome                        | Musculoskeletal disorders congenital NEC                            | Musculoskeletal and connective tissue disorders congenital | Congenital, familial and genetic disorders |
| Vaginal septum                         | Female reproductive tract disorders congenital                      | Reproductive tract and breast disorders congenital         | Congenital, familial and genetic disorders |

|                                                                 |                                                                     |                                                            |                                            |
|-----------------------------------------------------------------|---------------------------------------------------------------------|------------------------------------------------------------|--------------------------------------------|
| Femoral retroversion                                            | Musculoskeletal and connective tissue disorders of limbs congenital | Musculoskeletal and connective tissue disorders congenital | Congenital, familial and genetic disorders |
| Tibial torsion                                                  | Musculoskeletal and connective tissue disorders of limbs congenital | Musculoskeletal and connective tissue disorders congenital | Congenital, familial and genetic disorders |
| Femoral anteversion                                             | Musculoskeletal and connective tissue disorders of limbs congenital | Musculoskeletal and connective tissue disorders congenital | Congenital, familial and genetic disorders |
| Umbilical cord haemorrhage                                      | Gastrointestinal tract disorders congenital NEC                     | Gastrointestinal tract disorders congenital                | Congenital, familial and genetic disorders |
| Chronic infantile neurological cutaneous and articular syndrome | Musculoskeletal and connective tissue disorders of limbs congenital | Musculoskeletal and connective tissue disorders congenital | Congenital, familial and genetic disorders |
| Muckle-Wells syndrome                                           | Musculoskeletal and connective tissue disorders of limbs congenital | Musculoskeletal and connective tissue disorders congenital | Congenital, familial and genetic disorders |
| Familial cold autoinflammatory syndrome                         | Musculoskeletal and connective tissue disorders of limbs congenital | Musculoskeletal and connective tissue disorders congenital | Congenital, familial and genetic disorders |
| Gene mutation                                                   | Chromosomal abnormalities NEC                                       | Chromosomal abnormalities and abnormal gene carriers       | Congenital, familial and genetic disorders |
| Marcus Gunn syndrome                                            | Eyelid disorders congenital                                         | Eye disorders congenital                                   | Congenital, familial and genetic disorders |
| Bronchogenic cyst                                               | Pulmonary and bronchial disorders congenital                        | Respiratory disorders congenital                           | Congenital, familial and genetic disorders |
| Haemorrhagic arteriovenous malformation                         | Vascular anomalies congenital NEC                                   | Cardiac and vascular disorders congenital                  | Congenital, familial and genetic disorders |
| Berdon's syndrome                                               | Gastrointestinal tract disorders congenital NEC                     | Gastrointestinal tract disorders congenital                | Congenital, familial and genetic disorders |
| Renal aplasia                                                   | Renal disorders congenital                                          | Renal and urinary tract disorders congenital               | Congenital, familial and genetic disorders |
| Congenital lenticonus                                           | Lens disorders congenital                                           | Eye disorders congenital                                   | Congenital, familial and genetic disorders |

|                                                    |                                                                     |                                                            |                                            |
|----------------------------------------------------|---------------------------------------------------------------------|------------------------------------------------------------|--------------------------------------------|
| Hepatic infiltration eosinophilic                  | Hepatocellular damage and hepatitis NEC                             | Hepatic and hepatobiliary disorders                        | Hepatobiliary disorders                    |
| Graft versus host disease in liver                 | Immune and associated conditions NEC                                | Immune disorders NEC                                       | Immune system disorders                    |
| Primary immunodeficiency syndrome                  | Immune system abnormalities congenital                              | Immune system disorders congenital                         | Congenital, familial and genetic disorders |
| Urethral atresia                                   | Renal and urinary tract disorders congenital NEC                    | Renal and urinary tract disorders congenital               | Congenital, familial and genetic disorders |
| Anomalous arrangement of pancreaticobiliary duct   | Hepatobiliary abnormalities congenital                              | Hepatobiliary disorders congenital                         | Congenital, familial and genetic disorders |
| Preternatural anus                                 | Anorectal disorders congenital                                      | Gastrointestinal tract disorders congenital                | Congenital, familial and genetic disorders |
| Sacralisation                                      | Musculoskeletal and connective tissue disorders of spine congenital | Musculoskeletal and connective tissue disorders congenital | Congenital, familial and genetic disorders |
| Penoscrotal fusion                                 | Male reproductive tract disorders congenital                        | Reproductive tract and breast disorders congenital         | Congenital, familial and genetic disorders |
| Hypoplastic right heart syndrome                   | Cardiac hypoplasias congenital                                      | Cardiac and vascular disorders congenital                  | Congenital, familial and genetic disorders |
| Weill-Marchesani syndrome                          | Musculoskeletal disorders congenital NEC                            | Musculoskeletal and connective tissue disorders congenital | Congenital, familial and genetic disorders |
| Factor II mutation                                 | Coagulation disorders congenital                                    | Blood and lymphatic system disorders congenital            | Congenital, familial and genetic disorders |
| Membranous lipodystrophy                           | Inborn errors of lipid metabolism                                   | Metabolic and nutritional disorders congenital             | Congenital, familial and genetic disorders |
| Mayer-Rokitansky-Kuster-Hauser syndrome            | Female reproductive tract disorders congenital                      | Reproductive tract and breast disorders congenital         | Congenital, familial and genetic disorders |
| Mitochondrial neurogastrointestinal encephalopathy | Genetic mitochondrial abnormalities NEC                             | Cytoplasmic disorders congenital                           | Congenital, familial and genetic disorders |
| Prominent epicanthal folds                         | Eyelid disorders congenital                                         | Eye disorders congenital                                   | Congenital, familial and genetic           |

|                                                                                            |                                                                     |                                                            |                                            |
|--------------------------------------------------------------------------------------------|---------------------------------------------------------------------|------------------------------------------------------------|--------------------------------------------|
|                                                                                            |                                                                     |                                                            | disorders                                  |
| Hepatic calcification                                                                      | Hepatic and hepatobiliary disorders NEC                             | Hepatic and hepatobiliary disorders                        | Hepatobiliary disorders                    |
| Ocular albinism                                                                            | Ocular disorders congenital NEC                                     | Eye disorders congenital                                   | Congenital, familial and genetic disorders |
| Craniotabes                                                                                | Musculoskeletal and connective tissue disorders of skull congenital | Musculoskeletal and connective tissue disorders congenital | Congenital, familial and genetic disorders |
| Coagulation factor mutation                                                                | Coagulation disorders congenital                                    | Blood and lymphatic system disorders congenital            | Congenital, familial and genetic disorders |
| Cerebral autosomal dominant arteriopathy with subcortical infarcts and leukoencephalopathy | Cerebral disorders congenital                                       | Neurological disorders congenital                          | Congenital, familial and genetic disorders |
| Bone marrow failure                                                                        | Marrow depression and hypoplastic anaemias                          | Anaemias nonhaemolytic and marrow depression               | Blood and lymphatic system disorders       |
| Mount-Reback syndrome                                                                      | Neurological disorders congenital NEC                               | Neurological disorders congenital                          | Congenital, familial and genetic disorders |
| Left ventricle outflow tract obstruction                                                   | Cardiovascular disorders congenital NEC                             | Cardiac and vascular disorders congenital                  | Congenital, familial and genetic disorders |
| VACTERL syndrome                                                                           | Congenital disorders NEC                                            | Congenital and hereditary disorders NEC                    | Congenital, familial and genetic disorders |
| Dysmorphism                                                                                | Musculoskeletal disorders congenital NEC                            | Musculoskeletal and connective tissue disorders congenital | Congenital, familial and genetic disorders |
| Congenital aqueductal stenosis                                                             | Cerebral disorders congenital                                       | Neurological disorders congenital                          | Congenital, familial and genetic disorders |
| Urachal abnormality                                                                        | Bladder disorders congenital                                        | Renal and urinary tract disorders congenital               | Congenital, familial and genetic disorders |
| Distichiasis                                                                               | Eyelid disorders congenital                                         | Eye disorders congenital                                   | Congenital, familial and genetic disorders |
| Hyper IgM syndrome                                                                         | Immune system abnormalities congenital                              | Immune system disorders congenital                         | Congenital, familial and genetic           |



|                                             |                                                                                  |                                                            |                                            |
|---------------------------------------------|----------------------------------------------------------------------------------|------------------------------------------------------------|--------------------------------------------|
|                                             |                                                                                  |                                                            | disorders                                  |
| Congenital central hypoventilation syndrome | Central nervous system disorders congenital NEC                                  | Neurological disorders congenital                          | Congenital, familial and genetic disorders |
| Metaphyseal dysplasia                       | Musculoskeletal disorders congenital NEC                                         | Musculoskeletal and connective tissue disorders congenital | Congenital, familial and genetic disorders |
| Vertical talus                              | Musculoskeletal and connective tissue disorders of limbs congenital              | Musculoskeletal and connective tissue disorders congenital | Congenital, familial and genetic disorders |
| Acute graft versus host disease in liver    | Immune and associated conditions NEC                                             | Immune disorders NEC                                       | Immune system disorders                    |
| Sucrase-isomaltase deficiency               | Inborn errors of carbohydrate metabolism (excl glucose)                          | Metabolic and nutritional disorders congenital             | Congenital, familial and genetic disorders |
| Glucose-galactose malabsorption             | Inborn errors of carbohydrate metabolism (excl glucose)                          | Metabolic and nutritional disorders congenital             | Congenital, familial and genetic disorders |
| Velo-cardio-facial syndrome                 | Musculoskeletal and connective tissue disorders of face, neck and jaw congenital | Musculoskeletal and connective tissue disorders congenital | Congenital, familial and genetic disorders |
| Foetal anticonvulsant syndrome              | Chemically-induced congenital syndromes                                          | Congenital and hereditary disorders NEC                    | Congenital, familial and genetic disorders |
| Hepatic encephalopathy prophylaxis          | Prophylactic procedures NEC                                                      | Therapeutic procedures and supportive care NEC             | Surgical and medical procedures            |
| Mixed liver injury                          | Hepatocellular damage and hepatitis NEC                                          | Hepatic and hepatobiliary disorders                        | Hepatobiliary disorders                    |
| Li-Fraumeni syndrome                        | Abnormal gene carriers                                                           | Chromosomal abnormalities and abnormal gene carriers       | Congenital, familial and genetic disorders |
| Heterochromia iridis                        | Iris and choroid disorders congenital                                            | Eye disorders congenital                                   | Congenital, familial and genetic disorders |
| Mitral valve atresia                        | Cardiac valve disorders congenital                                               | Cardiac and vascular disorders congenital                  | Congenital, familial and genetic disorders |
| Aortic valve atresia                        | Cardiac valve disorders congenital                                               | Cardiac and vascular disorders congenital                  | Congenital, familial and genetic disorders |

|                                     |                                                                                  |                                                            |                                            |
|-------------------------------------|----------------------------------------------------------------------------------|------------------------------------------------------------|--------------------------------------------|
| Shone complex                       | Cardiac valve disorders congenital                                               | Cardiac and vascular disorders congenital                  | Congenital, familial and genetic disorders |
| Sertoli-cell-only syndrome          | Male reproductive tract disorders congenital                                     | Reproductive tract and breast disorders congenital         | Congenital, familial and genetic disorders |
| Periventricular nodular heterotopia | Cerebral disorders congenital                                                    | Neurological disorders congenital                          | Congenital, familial and genetic disorders |
| Congenital renal disorder           | Renal disorders congenital                                                       | Renal and urinary tract disorders congenital               | Congenital, familial and genetic disorders |
| Vertebral artery hypoplasia         | Vascular anomalies congenital NEC                                                | Cardiac and vascular disorders congenital                  | Congenital, familial and genetic disorders |
| Congenital condyloma                | Viral infections congenital                                                      | Infections and infestations congenital                     | Congenital, familial and genetic disorders |
| Craniofacial dysostosis             | Musculoskeletal and connective tissue disorders of face, neck and jaw congenital | Musculoskeletal and connective tissue disorders congenital | Congenital, familial and genetic disorders |
| Vitello-intestinal duct remnant     | Intestinal disorders congenital                                                  | Gastrointestinal tract disorders congenital                | Congenital, familial and genetic disorders |
| Familial hemiplegic migraine        | Neurological disorders congenital NEC                                            | Neurological disorders congenital                          | Congenital, familial and genetic disorders |
| Liver injury                        | Hepatic and hepatobiliary disorders NEC                                          | Hepatic and hepatobiliary disorders                        | Hepatobiliary disorders                    |
| Buried penis syndrome               | Male reproductive tract disorders congenital                                     | Reproductive tract and breast disorders congenital         | Congenital, familial and genetic disorders |
| Faciodigitogenital dysplasia        | Musculoskeletal disorders congenital NEC                                         | Musculoskeletal and connective tissue disorders congenital | Congenital, familial and genetic disorders |
| Septo-optic dysplasia               | Optic nerve and optic disc disorders congenital                                  | Eye disorders congenital                                   | Congenital, familial and genetic disorders |
| Congenital abdominal hernia         | Gastrointestinal tract disorders congenital NEC                                  | Gastrointestinal tract disorders congenital                | Congenital, familial and genetic disorders |

|                              |                                                       |                                                            |                                                 |
|------------------------------|-------------------------------------------------------|------------------------------------------------------------|-------------------------------------------------|
| Naevus flammeus              | Skin and subcutaneous tissue disorders congenital NEC | Skin and subcutaneous tissue disorders congenital          | Congenital, familial and genetic disorders      |
| Heterotaxia                  | Congenital disorders NEC                              | Congenital and hereditary disorders NEC                    | Congenital, familial and genetic disorders      |
| Portopulmonary hypertension  | Pulmonary hypertensions                               | Pulmonary vascular disorders                               | Respiratory, thoracic and mediastinal disorders |
| Penoscrotal transposition    | Male reproductive tract disorders congenital          | Reproductive tract and breast disorders congenital         | Congenital, familial and genetic disorders      |
| Retrograde portal vein flow  | Hepatic vascular disorders                            | Hepatic and hepatobiliary disorders                        | Hepatobiliary disorders                         |
| Radiation leukopenia         | Radiation injuries                                    | Injuries by physical agents                                | Injury, poisoning and procedural complications  |
| Hepatic hydrothorax          | Pneumothorax and pleural effusions NEC                | Pleural disorders                                          | Respiratory, thoracic and mediastinal disorders |
| Costello syndrome            | Musculoskeletal disorders congenital NEC              | Musculoskeletal and connective tissue disorders congenital | Congenital, familial and genetic disorders      |
| Right aortic arch            | Great vessel disorders congenital                     | Cardiac and vascular disorders congenital                  | Congenital, familial and genetic disorders      |
| Cloacal exstrophy            | Reproductive tract disorders congenital NEC           | Reproductive tract and breast disorders congenital         | Congenital, familial and genetic disorders      |
| Cytogenetic abnormality      | Chromosomal abnormalities NEC                         | Chromosomal abnormalities and abnormal gene carriers       | Congenital, familial and genetic disorders      |
| Dysmyelination               | Lysosomal storage disorders                           | Metabolic and nutritional disorders congenital             | Congenital, familial and genetic disorders      |
| Canavan disease              | Lysosomal storage disorders                           | Metabolic and nutritional disorders congenital             | Congenital, familial and genetic disorders      |
| Metachromatic leukodystrophy | Lysosomal storage disorders                           | Metabolic and nutritional disorders congenital             | Congenital, familial and genetic disorders      |

|                                                              |                                                                                  |                                                            |                                            |
|--------------------------------------------------------------|----------------------------------------------------------------------------------|------------------------------------------------------------|--------------------------------------------|
| Pelizaeus-Merzbacher disease                                 | Lysosomal storage disorders                                                      | Metabolic and nutritional disorders congenital             | Congenital, familial and genetic disorders |
| Uterine aplasia                                              | Female reproductive tract disorders congenital                                   | Reproductive tract and breast disorders congenital         | Congenital, familial and genetic disorders |
| Beta ketothiolase deficiency                                 | Inborn errors of lipid metabolism                                                | Metabolic and nutritional disorders congenital             | Congenital, familial and genetic disorders |
| Mitochondrial enzyme deficiency                              | Inborn errors of metabolism NEC                                                  | Metabolic and nutritional disorders congenital             | Congenital, familial and genetic disorders |
| Focal segmental glomerulosclerosis                           | Glomerulonephritis and nephrotic syndrome                                        | Nephropathies                                              | Renal and urinary disorders                |
| Congenital skin disorder                                     | Skin and subcutaneous tissue disorders congenital NEC                            | Skin and subcutaneous tissue disorders congenital          | Congenital, familial and genetic disorders |
| Tumour necrosis factor receptor-associated periodic syndrome | Immune system abnormalities congenital                                           | Immune system disorders congenital                         | Congenital, familial and genetic disorders |
| Splenic varices                                              | Spleen disorders                                                                 | Spleen, lymphatic and reticuloendothelial system disorders | Blood and lymphatic system disorders       |
| Arcuate foramen                                              | Musculoskeletal and connective tissue disorders of spine congenital              | Musculoskeletal and connective tissue disorders congenital | Congenital, familial and genetic disorders |
| Nijmegen breakage syndrome                                   | Musculoskeletal and connective tissue disorders of face, neck and jaw congenital | Musculoskeletal and connective tissue disorders congenital | Congenital, familial and genetic disorders |
| Benign familial neonatal convulsions                         | Neurological disorders congenital NEC                                            | Neurological disorders congenital                          | Congenital, familial and genetic disorders |
| Immunotactoid glomerulonephritis                             | Glomerulonephritis and nephrotic syndrome                                        | Nephropathies                                              | Renal and urinary disorders                |
| Kidney malrotation                                           | Renal disorders congenital                                                       | Renal and urinary tract disorders congenital               | Congenital, familial and genetic disorders |
| Congenital tricuspid valve incompetence                      | Cardiac valve disorders congenital                                               | Cardiac and vascular disorders congenital                  | Congenital, familial and genetic disorders |
| Shwachman-Diamond syndrome                                   | Pancreatic disorders congenital                                                  | Gastrointestinal tract disorders congenital                | Congenital, familial and genetic           |

|                                            |                                            |                                                      |                                            |
|--------------------------------------------|--------------------------------------------|------------------------------------------------------|--------------------------------------------|
|                                            |                                            |                                                      | disorders                                  |
| Cholestatic liver injury                   | Hepatocellular damage and hepatitis NEC    | Hepatic and hepatobiliary disorders                  | Hepatobiliary disorders                    |
| Renal fusion anomaly                       | Renal disorders congenital                 | Renal and urinary tract disorders congenital         | Congenital, familial and genetic disorders |
| Pure white cell aplasia                    | Marrow depression and hypoplastic anaemias | Anaemias nonhaemolytic and marrow depression         | Blood and lymphatic system disorders       |
| Chimerism                                  | Chromosomal abnormalities NEC              | Chromosomal abnormalities and abnormal gene carriers | Congenital, familial and genetic disorders |
| Mosaicism                                  | Chromosomal abnormalities NEC              | Chromosomal abnormalities and abnormal gene carriers | Congenital, familial and genetic disorders |
| Accessory spleen                           | Lymphatic system disorders congenital      | Blood and lymphatic system disorders congenital      | Congenital, familial and genetic disorders |
| Congenital ureterovesical junction anomaly | Bladder disorders congenital               | Renal and urinary tract disorders congenital         | Congenital, familial and genetic disorders |
| Aspartylglucosaminuria                     | Lysosomal storage disorders                | Metabolic and nutritional disorders congenital       | Congenital, familial and genetic disorders |
| Trimethylaminuria                          | Inborn errors of metabolism NEC            | Metabolic and nutritional disorders congenital       | Congenital, familial and genetic disorders |
| Cystic fibrosis related diabetes           | Endocrine disorders congenital NEC         | Endocrine disorders congenital                       | Congenital, familial and genetic disorders |
| Fibrillary glomerulonephritis              | Glomerulonephritis and nephrotic syndrome  | Nephropathies                                        | Renal and urinary disorders                |
| Cystic fibrosis hepatic disease            | Hepatobiliary abnormalities congenital     | Hepatobiliary disorders congenital                   | Congenital, familial and genetic disorders |
| Congenital nephrogenic diabetes insipidus  | Renal disorders congenital                 | Renal and urinary tract disorders congenital         | Congenital, familial and genetic disorders |
| Microencephaly                             | Cerebral disorders congenital              | Neurological disorders congenital                    | Congenital, familial and genetic disorders |

|                                         |                                                                     |                                                            |                                            |
|-----------------------------------------|---------------------------------------------------------------------|------------------------------------------------------------|--------------------------------------------|
| Congenital inguinal hernia              | Gastrointestinal tract disorders congenital NEC                     | Gastrointestinal tract disorders congenital                | Congenital, familial and genetic disorders |
| Femur-fibula-ulna complex               | Musculoskeletal and connective tissue disorders of limbs congenital | Musculoskeletal and connective tissue disorders congenital | Congenital, familial and genetic disorders |
| Septate hymen                           | Female reproductive tract disorders congenital                      | Reproductive tract and breast disorders congenital         | Congenital, familial and genetic disorders |
| Microvillous inclusion disease          | Intestinal disorders congenital                                     | Gastrointestinal tract disorders congenital                | Congenital, familial and genetic disorders |
| Pulmonary renal syndrome                | Glomerulonephritis and nephrotic syndrome                           | Nephropathies                                              | Renal and urinary disorders                |
| 18q minus syndrome                      | Autosomal chromosomal abnormalities                                 | Chromosomal abnormalities and abnormal gene carriers       | Congenital, familial and genetic disorders |
| Bacterascites                           | Bacterial infections NEC                                            | Bacterial infectious disorders                             | Infections and infestations                |
| Congenital oxalosis                     | Inborn errors of metabolism NEC                                     | Metabolic and nutritional disorders congenital             | Congenital, familial and genetic disorders |
| Bulbospinal muscular atrophy congenital | Neurological disorders congenital NEC                               | Neurological disorders congenital                          | Congenital, familial and genetic disorders |
| Hepatitis virus-associated nephropathy  | Hepatitis viral infections                                          | Viral infectious disorders                                 | Infections and infestations                |
| Platyspondylia                          | Musculoskeletal and connective tissue disorders of spine congenital | Musculoskeletal and connective tissue disorders congenital | Congenital, familial and genetic disorders |
| Dowling-Degos disease                   | Skin and subcutaneous tissue disorders congenital NEC               | Skin and subcutaneous tissue disorders congenital          | Congenital, familial and genetic disorders |
| Splenic varices haemorrhage             | Spleen disorders                                                    | Spleen, lymphatic and reticuloendothelial system disorders | Blood and lymphatic system disorders       |
| Liver sarcoidosis                       | Hepatic and hepatobiliary disorders NEC                             | Hepatic and hepatobiliary disorders                        | Hepatobiliary disorders                    |
| Ductus venosus agenesis                 | Venous disorders congenital                                         | Cardiac and vascular disorders congenital                  | Congenital, familial and genetic disorders |

|                                                   |                                                                                  |                                                            |                                            |
|---------------------------------------------------|----------------------------------------------------------------------------------|------------------------------------------------------------|--------------------------------------------|
| Familial hypocalciuric hypercalcaemia             | Endocrine disorders congenital NEC                                               | Endocrine disorders congenital                             | Congenital, familial and genetic disorders |
| Umbilical haematoma                               | Gastrointestinal tract disorders congenital NEC                                  | Gastrointestinal tract disorders congenital                | Congenital, familial and genetic disorders |
| Fibrodysplasia ossificans progressiva             | Non-site specific muscle disorders congenital                                    | Musculoskeletal and connective tissue disorders congenital | Congenital, familial and genetic disorders |
| Alstroem syndrome                                 | Retinal disorders congenital                                                     | Eye disorders congenital                                   | Congenital, familial and genetic disorders |
| Sticky platelet syndrome                          | Coagulation disorders congenital                                                 | Blood and lymphatic system disorders congenital            | Congenital, familial and genetic disorders |
| Metabolic myopathy                                | Inborn errors of carbohydrate metabolism (excl glucose)                          | Metabolic and nutritional disorders congenital             | Congenital, familial and genetic disorders |
| Cobb syndrome                                     | Vascular anomalies congenital NEC                                                | Cardiac and vascular disorders congenital                  | Congenital, familial and genetic disorders |
| Olmsted syndrome                                  | Skin and subcutaneous tissue disorders congenital NEC                            | Skin and subcutaneous tissue disorders congenital          | Congenital, familial and genetic disorders |
| Gnathosthosis                                     | Musculoskeletal and connective tissue disorders of face, neck and jaw congenital | Musculoskeletal and connective tissue disorders congenital | Congenital, familial and genetic disorders |
| Cryopyrin associated periodic syndrome            | Musculoskeletal and connective tissue disorders of limbs congenital              | Musculoskeletal and connective tissue disorders congenital | Congenital, familial and genetic disorders |
| Myotonic dystrophy                                | Non-site specific muscle disorders congenital                                    | Musculoskeletal and connective tissue disorders congenital | Congenital, familial and genetic disorders |
| Tubulointerstitial nephritis and uveitis syndrome | Nephritis NEC                                                                    | Nephropathies                                              | Renal and urinary disorders                |
| Cutaneous angiomas with thrombocytopenia          | Vascular anomalies congenital NEC                                                | Cardiac and vascular disorders congenital                  | Congenital, familial and genetic disorders |
| Laryngeal cleft                                   | Laryngeal and tracheal disorders congenital                                      | Respiratory disorders congenital                           | Congenital, familial and genetic disorders |

|                                                          |                                                       |                                                            |                                            |
|----------------------------------------------------------|-------------------------------------------------------|------------------------------------------------------------|--------------------------------------------|
| Tetrahydrobiopterin deficiency                           | Inborn errors of amino acid metabolism                | Metabolic and nutritional disorders congenital             | Congenital, familial and genetic disorders |
| Congenital myopia                                        | Ocular disorders congenital NEC                       | Eye disorders congenital                                   | Congenital, familial and genetic disorders |
| Dent's disease                                           | Renal and urinary tract disorders congenital NEC      | Renal and urinary tract disorders congenital               | Congenital, familial and genetic disorders |
| Waardenburg syndrome                                     | Autosomal chromosomal abnormalities                   | Chromosomal abnormalities and abnormal gene carriers       | Congenital, familial and genetic disorders |
| Naevus anaemicus                                         | Skin and subcutaneous tissue disorders congenital NEC | Skin and subcutaneous tissue disorders congenital          | Congenital, familial and genetic disorders |
| Hereditary neuropathy with liability to pressure palsies | Peripheral nervous system disorders congenital NEC    | Neurological disorders congenital                          | Congenital, familial and genetic disorders |
| Chiari network                                           | Cardiac disorders congenital NEC                      | Cardiac and vascular disorders congenital                  | Congenital, familial and genetic disorders |
| Wildervanck syndrome                                     | Musculoskeletal disorders congenital NEC              | Musculoskeletal and connective tissue disorders congenital | Congenital, familial and genetic disorders |
| Rippling muscle disease                                  | Non-site specific muscle disorders congenital         | Musculoskeletal and connective tissue disorders congenital | Congenital, familial and genetic disorders |
| Pancreas divisum                                         | Pancreatic disorders congenital                       | Gastrointestinal tract disorders congenital                | Congenital, familial and genetic disorders |
| Persistent cloaca                                        | Reproductive tract disorders congenital NEC           | Reproductive tract and breast disorders congenital         | Congenital, familial and genetic disorders |
| Acrokeratosis verruciformis                              | Skin and subcutaneous tissue disorders congenital NEC | Skin and subcutaneous tissue disorders congenital          | Congenital, familial and genetic disorders |
| Azygos lobe                                              | Pulmonary and bronchial disorders congenital          | Respiratory disorders congenital                           | Congenital, familial and genetic disorders |
| Congenital monorchidism                                  | Male reproductive tract disorders congenital          | Reproductive tract and breast disorders congenital         | Congenital, familial and genetic disorders |



|                                                |                                                                     |                                                            |                                            |
|------------------------------------------------|---------------------------------------------------------------------|------------------------------------------------------------|--------------------------------------------|
| Autoimmune lymphoproliferative syndrome        | Immune system abnormalities congenital                              | Immune system disorders congenital                         | Congenital, familial and genetic disorders |
| Cartilage-hair hypoplasia                      | Musculoskeletal disorders congenital NEC                            | Musculoskeletal and connective tissue disorders congenital | Congenital, familial and genetic disorders |
| Molybdenum cofactor deficiency                 | Inborn errors of amino acid metabolism                              | Metabolic and nutritional disorders congenital             | Congenital, familial and genetic disorders |
| Nasopharyngeal atresia                         | Pharyngeal disorders congenital                                     | Respiratory disorders congenital                           | Congenital, familial and genetic disorders |
| Primary ciliary dyskinesia                     | Respiratory tract disorders congenital NEC                          | Respiratory disorders congenital                           | Congenital, familial and genetic disorders |
| Norrie's disease                               | Retinal disorders congenital                                        | Eye disorders congenital                                   | Congenital, familial and genetic disorders |
| Congenital cranial nerve paralysis             | Neurological disorders congenital NEC                               | Neurological disorders congenital                          | Congenital, familial and genetic disorders |
| Os trigonum                                    | Musculoskeletal and connective tissue disorders of limbs congenital | Musculoskeletal and connective tissue disorders congenital | Congenital, familial and genetic disorders |
| Myoclonic epilepsy and ragged-red fibres       | Genetic mitochondrial abnormalities NEC                             | Cytoplasmic disorders congenital                           | Congenital, familial and genetic disorders |
| Clostridium test positive                      | Bacteria identification and serology (excl mycobacteria)            | Microbiology and serology investigations                   | Investigations                             |
| Penile torsion                                 | Male reproductive tract disorders congenital                        | Reproductive tract and breast disorders congenital         | Congenital, familial and genetic disorders |
| Inherited cardiac conduction disorder          | Cardiac disorders congenital NEC                                    | Cardiac and vascular disorders congenital                  | Congenital, familial and genetic disorders |
| Methylenetetrahydrofolate reductase deficiency | Inborn errors of amino acid metabolism                              | Metabolic and nutritional disorders congenital             | Congenital, familial and genetic disorders |
| Congenital intrinsic factor deficiency         | Inborn errors of metabolism NEC                                     | Metabolic and nutritional disorders congenital             | Congenital, familial and genetic disorders |

|                                             |                                                                                  |                                                            |                                            |
|---------------------------------------------|----------------------------------------------------------------------------------|------------------------------------------------------------|--------------------------------------------|
| Sclerotylosis                               | Skin and subcutaneous tissue disorders congenital NEC                            | Skin and subcutaneous tissue disorders congenital          | Congenital, familial and genetic disorders |
| Fibrous dysplasia of jaw                    | Musculoskeletal and connective tissue disorders of face, neck and jaw congenital | Musculoskeletal and connective tissue disorders congenital | Congenital, familial and genetic disorders |
| Disorder of sex development                 | Reproductive tract disorders congenital NEC                                      | Reproductive tract and breast disorders congenital         | Congenital, familial and genetic disorders |
| Meier-Gorlin syndrome                       | Musculoskeletal disorders congenital NEC                                         | Musculoskeletal and connective tissue disorders congenital | Congenital, familial and genetic disorders |
| Nonketotic hyperglycinaemia                 | Inborn errors of amino acid metabolism                                           | Metabolic and nutritional disorders congenital             | Congenital, familial and genetic disorders |
| Cortical dysplasia                          | Cerebral disorders congenital                                                    | Neurological disorders congenital                          | Congenital, familial and genetic disorders |
| Leber's congenital amaurosis                | Retinal disorders congenital                                                     | Eye disorders congenital                                   | Congenital, familial and genetic disorders |
| Huntington's disease                        | Neurological disorders congenital NEC                                            | Neurological disorders congenital                          | Congenital, familial and genetic disorders |
| HIV associated nephropathy                  | Retroviral infections                                                            | Viral infectious disorders                                 | Infections and infestations                |
| Acute yellow liver atrophy                  | Hepatocellular damage and hepatitis NEC                                          | Hepatic and hepatobiliary disorders                        | Hepatobiliary disorders                    |
| Persistent pupillary membrane               | Iris and choroid disorders congenital                                            | Eye disorders congenital                                   | Congenital, familial and genetic disorders |
| Inborn error in primary bile acid synthesis | Inborn errors of steroid synthesis                                               | Metabolic and nutritional disorders congenital             | Congenital, familial and genetic disorders |
| Congenital hypercoagulation                 | Coagulation disorders congenital                                                 | Blood and lymphatic system disorders congenital            | Congenital, familial and genetic disorders |
| Spina bifida cystica                        | Central nervous system disorders congenital NEC                                  | Neurological disorders congenital                          | Congenital, familial and genetic disorders |
| Laevocardia                                 | Cardiac malpositions congenital                                                  | Cardiac and vascular disorders congenital                  | Congenital, familial and genetic           |

|                                                 |                                                 |                                                 |                                            |
|-------------------------------------------------|-------------------------------------------------|-------------------------------------------------|--------------------------------------------|
|                                                 |                                                 |                                                 | disorders                                  |
| Platelet glycoprotein gene mutation             | Coagulation disorders congenital                | Blood and lymphatic system disorders congenital | Congenital, familial and genetic disorders |
| Primary insulin like growth factor-1 deficiency | Inborn errors of metabolism NEC                 | Metabolic and nutritional disorders congenital  | Congenital, familial and genetic disorders |
| N-acetylglutamate synthase deficiency           | Inborn errors of amino acid metabolism          | Metabolic and nutritional disorders congenital  | Congenital, familial and genetic disorders |
| Cystathionine beta-synthase deficiency          | Inborn errors of amino acid metabolism          | Metabolic and nutritional disorders congenital  | Congenital, familial and genetic disorders |
| Branchio-oto-renal syndrome                     | Ear disorders congenital NEC                    | Ear and labyrinthine disorders congenital       | Congenital, familial and genetic disorders |
| Subependymal nodular heterotopia                | Central nervous system disorders congenital NEC | Neurological disorders congenital               | Congenital, familial and genetic disorders |
| Foetal methotrexate syndrome                    | Chemically-induced congenital syndromes         | Congenital and hereditary disorders NEC         | Congenital, familial and genetic disorders |
| Protuberant ear                                 | External ear disorders congenital               | Ear and labyrinthine disorders congenital       | Congenital, familial and genetic disorders |
| Constricted ear deformity                       | External ear disorders congenital               | Ear and labyrinthine disorders congenital       | Congenital, familial and genetic disorders |
| Thalidomide embryopathy                         | Chemically-induced congenital syndromes         | Congenital and hereditary disorders NEC         | Congenital, familial and genetic disorders |
| Diabetic hepatopathy                            | Hepatic and hepatobiliary disorders NEC         | Hepatic and hepatobiliary disorders             | Hepatobiliary disorders                    |
| Hereditary motor neurone disease                | Neurological disorders congenital NEC           | Neurological disorders congenital               | Congenital, familial and genetic disorders |
| Biotinidase deficiency                          | Inborn errors of amino acid metabolism          | Metabolic and nutritional disorders congenital  | Congenital, familial and genetic disorders |
| Acetylcholinesterase deficiency                 | Inborn errors of metabolism NEC                 | Metabolic and nutritional disorders             | Congenital, familial and genetic           |

|                                         |                                                                     |                                                            |                                            |
|-----------------------------------------|---------------------------------------------------------------------|------------------------------------------------------------|--------------------------------------------|
|                                         |                                                                     | congenital                                                 | disorders                                  |
| Dyschondrosteosis                       | Musculoskeletal and connective tissue disorders of limbs congenital | Musculoskeletal and connective tissue disorders congenital | Congenital, familial and genetic disorders |
| Trisomy 9                               | Autosomal chromosomal abnormalities                                 | Chromosomal abnormalities and abnormal gene carriers       | Congenital, familial and genetic disorders |
| Autoimmune aplastic anaemia             | Marrow depression and hypoplastic anaemias                          | Anaemias nonhaemolytic and marrow depression               | Blood and lymphatic system disorders       |
| Anterior displaced anus                 | Anorectal disorders congenital                                      | Gastrointestinal tract disorders congenital                | Congenital, familial and genetic disorders |
| Micropenis                              | Male reproductive tract disorders congenital                        | Reproductive tract and breast disorders congenital         | Congenital, familial and genetic disorders |
| Thrombocytopenia-absent radius syndrome | Musculoskeletal and connective tissue disorders of limbs congenital | Musculoskeletal and connective tissue disorders congenital | Congenital, familial and genetic disorders |
| Acute focal bacterial nephritis         | Bacterial infections NEC                                            | Bacterial infectious disorders                             | Infections and infestations                |
| Blau syndrome                           | Congenital disorders NEC                                            | Congenital and hereditary disorders NEC                    | Congenital, familial and genetic disorders |
| Annular pancreas                        | Pancreatic disorders congenital                                     | Gastrointestinal tract disorders congenital                | Congenital, familial and genetic disorders |
| Trisomy 14                              | Autosomal chromosomal abnormalities                                 | Chromosomal abnormalities and abnormal gene carriers       | Congenital, familial and genetic disorders |
| Hermansky-Pudlak syndrome               | Lysosomal storage disorders                                         | Metabolic and nutritional disorders congenital             | Congenital, familial and genetic disorders |
| Frenulum breve                          | Male reproductive tract disorders congenital                        | Reproductive tract and breast disorders congenital         | Congenital, familial and genetic disorders |
| Hyper IgD syndrome                      | Inborn errors of metabolism NEC                                     | Metabolic and nutritional disorders congenital             | Congenital, familial and genetic disorders |
| Renal malposition                       | Renal disorders congenital                                          | Renal and urinary tract disorders                          | Congenital, familial and genetic           |

|                                                                   |                                                                     |                                                            |                                            |
|-------------------------------------------------------------------|---------------------------------------------------------------------|------------------------------------------------------------|--------------------------------------------|
|                                                                   |                                                                     | congenital                                                 | disorders                                  |
| Perinephritis                                                     | Nephritis NEC                                                       | Nephropathies                                              | Renal and urinary disorders                |
| Fatal familial insomnia                                           | Autosomal chromosomal abnormalities                                 | Chromosomal abnormalities and abnormal gene carriers       | Congenital, familial and genetic disorders |
| Congenital haematological disorder                                | Haematological disorders congenital NEC                             | Blood and lymphatic system disorders congenital            | Congenital, familial and genetic disorders |
| Craniolacunia                                                     | Musculoskeletal and connective tissue disorders of skull congenital | Musculoskeletal and connective tissue disorders congenital | Congenital, familial and genetic disorders |
| Hooded prepuce                                                    | Male reproductive tract disorders congenital                        | Reproductive tract and breast disorders congenital         | Congenital, familial and genetic disorders |
| Chronic graft versus host disease in liver                        | Immune and associated conditions NEC                                | Immune disorders NEC                                       | Immune system disorders                    |
| Auditory neuropathy spectrum disorder                             | Hearing disorders congenital                                        | Ear and labyrinthine disorders congenital                  | Congenital, familial and genetic disorders |
| Mevalonic aciduria                                                | Immune system abnormalities congenital                              | Immune system disorders congenital                         | Congenital, familial and genetic disorders |
| Mevalonate kinase deficiency                                      | Inborn errors of metabolism NEC                                     | Metabolic and nutritional disorders congenital             | Congenital, familial and genetic disorders |
| Pyogenic sterile arthritis pyoderma gangrenosum and acne syndrome | Immune system abnormalities congenital                              | Immune system disorders congenital                         | Congenital, familial and genetic disorders |
| Majeed's syndrome                                                 | Immune system abnormalities congenital                              | Immune system disorders congenital                         | Congenital, familial and genetic disorders |
| Deficiency of the interleukin-1 receptor antagonist               | Immune system abnormalities congenital                              | Immune system disorders congenital                         | Congenital, familial and genetic disorders |
| Familial scaphocephaly syndrome                                   | Musculoskeletal and connective tissue disorders of skull congenital | Musculoskeletal and connective tissue disorders congenital | Congenital, familial and genetic disorders |
| Drug-induced liver injury                                         | Hepatocellular damage and hepatitis NEC                             | Hepatic and hepatobiliary disorders                        | Hepatobiliary disorders                    |

|                                                          |                                                                     |                                                            |                                            |
|----------------------------------------------------------|---------------------------------------------------------------------|------------------------------------------------------------|--------------------------------------------|
| Inborn error of lipid metabolism                         | Inborn errors of lipid metabolism                                   | Metabolic and nutritional disorders congenital             | Congenital, familial and genetic disorders |
| 3-hydroxyacetyl-coenzyme A dehydrogenase deficiency      | Inborn errors of lipid metabolism                                   | Metabolic and nutritional disorders congenital             | Congenital, familial and genetic disorders |
| Intracranial lipoma                                      | Central nervous system disorders congenital NEC                     | Neurological disorders congenital                          | Congenital, familial and genetic disorders |
| Hand-foot-genital syndrome                               | Musculoskeletal and connective tissue disorders of limbs congenital | Musculoskeletal and connective tissue disorders congenital | Congenital, familial and genetic disorders |
| Sirenomelia                                              | Musculoskeletal and connective tissue disorders of limbs congenital | Musculoskeletal and connective tissue disorders congenital | Congenital, familial and genetic disorders |
| Hereditary palmoplantar keratoderma                      | Skin and subcutaneous tissue disorders congenital NEC               | Skin and subcutaneous tissue disorders congenital          | Congenital, familial and genetic disorders |
| Platonychia                                              | Hair and nail disorders congenital                                  | Skin and subcutaneous tissue disorders congenital          | Congenital, familial and genetic disorders |
| Adenine phosphoribosyl transferase deficiency            | Purine metabolism disorders congenital                              | Metabolic and nutritional disorders congenital             | Congenital, familial and genetic disorders |
| Skeletal dysplasia                                       | Non-site specific bone disorders congenital                         | Musculoskeletal and connective tissue disorders congenital | Congenital, familial and genetic disorders |
| Long-chain acyl-coenzyme A dehydrogenase deficiency      | Inborn errors of lipid metabolism                                   | Metabolic and nutritional disorders congenital             | Congenital, familial and genetic disorders |
| Medium-chain acyl-coenzyme A dehydrogenase deficiency    | Inborn errors of lipid metabolism                                   | Metabolic and nutritional disorders congenital             | Congenital, familial and genetic disorders |
| Short-chain acyl-coenzyme A dehydrogenase deficiency     | Inborn errors of lipid metabolism                                   | Metabolic and nutritional disorders congenital             | Congenital, familial and genetic disorders |
| Very long-chain acyl-coenzyme A dehydrogenase deficiency | Inborn errors of lipid metabolism                                   | Metabolic and nutritional disorders congenital             | Congenital, familial and genetic disorders |
| Extrarenal pelvis                                        | Renal disorders congenital                                          | Renal and urinary tract disorders congenital               | Congenital, familial and genetic disorders |

|                                       |                                                                     |                                                            |                                            |
|---------------------------------------|---------------------------------------------------------------------|------------------------------------------------------------|--------------------------------------------|
| Brachydactyly                         | Musculoskeletal and connective tissue disorders of limbs congenital | Musculoskeletal and connective tissue disorders congenital | Congenital, familial and genetic disorders |
| Mucopolipidosis type I                | Lysosomal storage disorders                                         | Metabolic and nutritional disorders congenital             | Congenital, familial and genetic disorders |
| Mucopolipidosis type II               | Lysosomal storage disorders                                         | Metabolic and nutritional disorders congenital             | Congenital, familial and genetic disorders |
| Mucopolipidosis type III              | Lysosomal storage disorders                                         | Metabolic and nutritional disorders congenital             | Congenital, familial and genetic disorders |
| Mucopolipidosis type IV               | Lysosomal storage disorders                                         | Metabolic and nutritional disorders congenital             | Congenital, familial and genetic disorders |
| Mucopolipidosis                       | Lysosomal storage disorders                                         | Metabolic and nutritional disorders congenital             | Congenital, familial and genetic disorders |
| Olfactory nerve agenesis              | Neurological disorders congenital NEC                               | Neurological disorders congenital                          | Congenital, familial and genetic disorders |
| Cerebellar dysplasia                  | Cerebellar disorders congenital                                     | Neurological disorders congenital                          | Congenital, familial and genetic disorders |
| Congenital skin dimples               | Skin and subcutaneous tissue disorders congenital NEC               | Skin and subcutaneous tissue disorders congenital          | Congenital, familial and genetic disorders |
| Congenital central diabetes insipidus | Endocrine disorders congenital NEC                                  | Endocrine disorders congenital                             | Congenital, familial and genetic disorders |
| Chronic autoimmune glomerulonephritis | Glomerulonephritis and nephrotic syndrome                           | Nephropathies                                              | Renal and urinary disorders                |
| Bloom syndrome                        | Musculoskeletal disorders congenital NEC                            | Musculoskeletal and connective tissue disorders congenital | Congenital, familial and genetic disorders |
| Infantile cortical hyperostosis       | Non-site specific bone disorders congenital                         | Musculoskeletal and connective tissue disorders congenital | Congenital, familial and genetic disorders |
| Congenital intestinal obstruction     | Intestinal disorders congenital                                     | Gastrointestinal tract disorders congenital                | Congenital, familial and genetic disorders |

|                                                        |                                             |                                                            |                                            |
|--------------------------------------------------------|---------------------------------------------|------------------------------------------------------------|--------------------------------------------|
| Portal vein dilatation                                 | Hepatic vascular disorders                  | Hepatic and hepatobiliary disorders                        | Hepatobiliary disorders                    |
| Haemochromatosis trait                                 | Hepatobiliary abnormalities congenital      | Hepatobiliary disorders congenital                         | Congenital, familial and genetic disorders |
| Kenny-Caffey syndrome                                  | Non-site specific bone disorders congenital | Musculoskeletal and connective tissue disorders congenital | Congenital, familial and genetic disorders |
| White blood cell analysis abnormal                     | White blood cell analyses                   | Haematology investigations (incl blood groups)             | Investigations                             |
| Twin reversed arterial perfusion sequence malformation | Congenital disorders NEC                    | Congenital and hereditary disorders NEC                    | Congenital, familial and genetic disorders |
| Microcolon                                             | Intestinal disorders congenital             | Gastrointestinal tract disorders congenital                | Congenital, familial and genetic disorders |
| Hydranencephaly                                        | Cerebral disorders congenital               | Neurological disorders congenital                          | Congenital, familial and genetic disorders |
| Schizencephaly                                         | Cerebral disorders congenital               | Neurological disorders congenital                          | Congenital, familial and genetic disorders |
| Polymicrogyria                                         | Cerebral disorders congenital               | Neurological disorders congenital                          | Congenital, familial and genetic disorders |
| Double cortex syndrome                                 | Cerebral disorders congenital               | Neurological disorders congenital                          | Congenital, familial and genetic disorders |
| Triple A syndrome                                      | Autosomal chromosomal abnormalities         | Chromosomal abnormalities and abnormal gene carriers       | Congenital, familial and genetic disorders |
| Congenital trichomegaly                                | Hair and nail disorders congenital          | Skin and subcutaneous tissue disorders congenital          | Congenital, familial and genetic disorders |
| Freeman-Sheldon syndrome                               | Musculoskeletal disorders congenital NEC    | Musculoskeletal and connective tissue disorders congenital | Congenital, familial and genetic disorders |
| Intestinal neuronal dysplasia                          | Intestinal disorders congenital             | Gastrointestinal tract disorders congenital                | Congenital, familial and genetic disorders |



|                                             |                                                                     |                                                            |                                            |
|---------------------------------------------|---------------------------------------------------------------------|------------------------------------------------------------|--------------------------------------------|
| Foetal megacystis                           | Bladder disorders congenital                                        | Renal and urinary tract disorders congenital               | Congenital, familial and genetic disorders |
| Pulmonary lymphangiectasia                  | Lymphatic system disorders congenital                               | Blood and lymphatic system disorders congenital            | Congenital, familial and genetic disorders |
| Hypocalvaria                                | Musculoskeletal and connective tissue disorders of skull congenital | Musculoskeletal and connective tissue disorders congenital | Congenital, familial and genetic disorders |
| Severe myoclonic epilepsy of infancy        | Neurological disorders congenital NEC                               | Neurological disorders congenital                          | Congenital, familial and genetic disorders |
| Familial renal glycosuria                   | Renal disorders congenital                                          | Renal and urinary tract disorders congenital               | Congenital, familial and genetic disorders |
| Foetal retinoid syndrome                    | Chemically-induced congenital syndromes                             | Congenital and hereditary disorders NEC                    | Congenital, familial and genetic disorders |
| Developmental hip dysplasia                 | Musculoskeletal and connective tissue disorders of limbs congenital | Musculoskeletal and connective tissue disorders congenital | Congenital, familial and genetic disorders |
| Osteopathia striata                         | Non-site specific bone disorders congenital                         | Musculoskeletal and connective tissue disorders congenital | Congenital, familial and genetic disorders |
| Larsen syndrome                             | Musculoskeletal and connective tissue disorders of limbs congenital | Musculoskeletal and connective tissue disorders congenital | Congenital, familial and genetic disorders |
| CANDLE syndrome                             | Skin and subcutaneous tissue disorders congenital NEC               | Skin and subcutaneous tissue disorders congenital          | Congenital, familial and genetic disorders |
| Choanal stenosis                            | Pharyngeal disorders congenital                                     | Respiratory disorders congenital                           | Congenital, familial and genetic disorders |
| Proteus syndrome                            | Musculoskeletal disorders congenital NEC                            | Musculoskeletal and connective tissue disorders congenital | Congenital, familial and genetic disorders |
| Craniofacial deformity                      | Musculoskeletal and connective tissue disorders of skull congenital | Musculoskeletal and connective tissue disorders congenital | Congenital, familial and genetic disorders |
| Congenital high airway obstruction syndrome | Laryngeal and tracheal disorders congenital                         | Respiratory disorders congenital                           | Congenital, familial and genetic disorders |

|                                                   |                                                                                  |                                                            |                                            |
|---------------------------------------------------|----------------------------------------------------------------------------------|------------------------------------------------------------|--------------------------------------------|
| Ectopic ovary                                     | Female reproductive tract disorders congenital                                   | Reproductive tract and breast disorders congenital         | Congenital, familial and genetic disorders |
| Transitional vertebrae                            | Musculoskeletal and connective tissue disorders of spine congenital              | Musculoskeletal and connective tissue disorders congenital | Congenital, familial and genetic disorders |
| Mobile caecum syndrome                            | Intestinal disorders congenital                                                  | Gastrointestinal tract disorders congenital                | Congenital, familial and genetic disorders |
| Dysgnathia                                        | Musculoskeletal and connective tissue disorders of face, neck and jaw congenital | Musculoskeletal and connective tissue disorders congenital | Congenital, familial and genetic disorders |
| Paranasal sinus aplasia                           | Nasal disorders congenital                                                       | Respiratory disorders congenital                           | Congenital, familial and genetic disorders |
| Congenital varicocele                             | Male reproductive tract disorders congenital                                     | Reproductive tract and breast disorders congenital         | Congenital, familial and genetic disorders |
| Post infection glomerulonephritis                 | Glomerulonephritis and nephrotic syndrome                                        | Nephropathies                                              | Renal and urinary disorders                |
| Shigella sepsis                                   | Shigella infections                                                              | Bacterial infectious disorders                             | Infections and infestations                |
| Congenital Horner's syndrome                      | Neurological disorders congenital NEC                                            | Neurological disorders congenital                          | Congenital, familial and genetic disorders |
| Neuronal ceroid lipofuscinosis                    | Lysosomal storage disorders                                                      | Metabolic and nutritional disorders congenital             | Congenital, familial and genetic disorders |
| Portal fibrosis                                   | Hepatic fibrosis and cirrhosis                                                   | Hepatic and hepatobiliary disorders                        | Hepatobiliary disorders                    |
| Methylenetetrahydrofolate reductase gene mutation | Inborn errors of amino acid metabolism                                           | Metabolic and nutritional disorders congenital             | Congenital, familial and genetic disorders |
| Myeloperoxidase deficiency                        | Immune system abnormalities congenital                                           | Immune system disorders congenital                         | Congenital, familial and genetic disorders |

#### 4.18 Renal failure adverse events

| Preferred term                       | High level term                         | High level group term                                 | System organ class              |
|--------------------------------------|-----------------------------------------|-------------------------------------------------------|---------------------------------|
| Acute prerenal failure               | Renal failure and impairment            | Renal disorders (excl nephropathies)                  | Renal and urinary disorders     |
| Albuminuria                          | Urinary abnormalities                   | Urinary tract signs and symptoms                      | Renal and urinary disorders     |
| Anuria                               | Renal failure and impairment            | Renal disorders (excl nephropathies)                  | Renal and urinary disorders     |
| Azotaemia                            | Renal failure complications             | Renal disorders (excl nephropathies)                  | Renal and urinary disorders     |
| Blood creatinine abnormal            | Renal function analyses                 | Renal and urinary tract investigations and urinalyses | Investigations                  |
| Blood creatinine increased           | Renal function analyses                 | Renal and urinary tract investigations and urinalyses | Investigations                  |
| Blood urea abnormal                  | Renal function analyses                 | Renal and urinary tract investigations and urinalyses | Investigations                  |
| Blood urea increased                 | Renal function analyses                 | Renal and urinary tract investigations and urinalyses | Investigations                  |
| Creatinine renal clearance decreased | Renal function analyses                 | Renal and urinary tract investigations and urinalyses | Investigations                  |
| Glomerular filtration rate abnormal  | Renal function analyses                 | Renal and urinary tract investigations and urinalyses | Investigations                  |
| Glomerular filtration rate decreased | Renal function analyses                 | Renal and urinary tract investigations and urinalyses | Investigations                  |
| Haemodialysis                        | Renal therapeutic procedures            | Renal and urinary tract therapeutic procedures        | Surgical and medical procedures |
| Nephritis                            | Nephritis NEC                           | Nephropathies                                         | Renal and urinary disorders     |
| Nephropathy toxic                    | Nephropathies and tubular disorders NEC | Nephropathies                                         | Renal and urinary disorders     |
| Oliguria                             | Renal failure and impairment            | Renal disorders (excl nephropathies)                  | Renal and urinary disorders     |
| Peritoneal dialysis                  | Renal therapeutic procedures            | Renal and urinary tract therapeutic procedures        | Surgical and medical procedures |
| Proteinuria                          | Urinary abnormalities                   | Urinary tract signs and symptoms                      | Renal and urinary disorders     |
| Renal failure                        | Renal failure and impairment            | Renal disorders (excl nephropathies)                  | Renal and urinary disorders     |

|                                                |                                              |                                                           |                                                      |
|------------------------------------------------|----------------------------------------------|-----------------------------------------------------------|------------------------------------------------------|
| Renal failure acute                            | Renal failure and impairment                 | Renal disorders (excl nephropathies)                      | Renal and urinary disorders                          |
| Renal failure neonatal                         | Renal failure and impairment                 | Renal disorders (excl nephropathies)                      | Renal and urinary disorders                          |
| Renal transplant                               | Renal therapeutic procedures                 | Renal and urinary tract therapeutic procedures            | Surgical and medical procedures                      |
| Renal tubular disorder                         | Nephropathies and tubular disorders NEC      | Nephropathies                                             | Renal and urinary disorders                          |
| Renal tubular necrosis                         | Renal vascular and ischaemic conditions      | Renal disorders (excl nephropathies)                      | Renal and urinary disorders                          |
| Urea renal clearance decreased                 | Renal function analyses                      | Renal and urinary tract investigations and urinalyses     | Investigations                                       |
| Tubulointerstitial nephritis                   | Nephritis NEC                                | Nephropathies                                             | Renal and urinary disorders                          |
| Oedema due to renal disease                    | Oedema NEC                                   | General system disorders NEC                              | General disorders and administration site conditions |
| Renal impairment neonatal                      | Renal failure and impairment                 | Renal disorders (excl nephropathies)                      | Renal and urinary disorders                          |
| Neonatal anuria                                | Renal failure and impairment                 | Renal disorders (excl nephropathies)                      | Renal and urinary disorders                          |
| Blood urea nitrogen/creatinine ratio increased | Renal function analyses                      | Renal and urinary tract investigations and urinalyses     | Investigations                                       |
| Haemofiltration                                | Haematological therapeutic procedures<br>NEC | Haematological and lymphoid tissue therapeutic procedures | Surgical and medical procedures                      |
| Protein urine present                          | Urinalysis NEC                               | Renal and urinary tract investigations and urinalyses     | Investigations                                       |
| Creatinine urine decreased                     | Renal function analyses                      | Renal and urinary tract investigations and urinalyses     | Investigations                                       |
| Urine output decreased                         | Urinary tract function analyses NEC          | Renal and urinary tract investigations and urinalyses     | Investigations                                       |
| Dialysis                                       | Renal therapeutic procedures                 | Renal and urinary tract therapeutic procedures            | Surgical and medical procedures                      |
| Renal function test abnormal                   | Renal function analyses                      | Renal and urinary tract investigations and urinalyses     | Investigations                                       |
| Renal impairment                               | Renal failure and impairment                 | Renal disorders (excl nephropathies)                      | Renal and urinary disorders                          |
| Hypercreatininaemia                            | Metabolic disorders NEC                      | Metabolism disorders NEC                                  | Metabolism and nutrition disorders                   |
| Continuous haemodiafiltration                  | Renal therapeutic procedures                 | Renal and urinary tract therapeutic procedures            | Surgical and medical procedures                      |

|                                     |                                         |                                                       |                                 |
|-------------------------------------|-----------------------------------------|-------------------------------------------------------|---------------------------------|
| Creatinine renal clearance abnormal | Renal function analyses                 | Renal and urinary tract investigations and urinalyses | Investigations                  |
| Acute phosphate nephropathy         | Nephropathies and tubular disorders NEC | Nephropathies                                         | Renal and urinary disorders     |
| Creatinine urine abnormal           | Renal function analyses                 | Renal and urinary tract investigations and urinalyses | Investigations                  |
| Crystal nephropathy                 | Nephropathies and tubular disorders NEC | Nephropathies                                         | Renal and urinary disorders     |
| Prerenal failure                    | Renal failure and impairment            | Renal disorders (excl nephropathies)                  | Renal and urinary disorders     |
| Intradialytic parenteral nutrition  | Dietary and nutritional therapies       | Therapeutic procedures and supportive care NEC        | Surgical and medical procedures |

#### 4.19 Malignant tumour adverse events

| Preferred term                             | High level term              | High level group term                    | System organ class                                                  |
|--------------------------------------------|------------------------------|------------------------------------------|---------------------------------------------------------------------|
| Acral lentiginous melanoma                 | Skin melanomas (excl ocular) | Skin neoplasms malignant and unspecified | Neoplasms benign, malignant and unspecified (incl cysts and polyps) |
| Acral lentiginous melanoma stage I         | Skin melanomas (excl ocular) | Skin neoplasms malignant and unspecified | Neoplasms benign, malignant and unspecified (incl cysts and polyps) |
| Acral lentiginous melanoma stage II        | Skin melanomas (excl ocular) | Skin neoplasms malignant and unspecified | Neoplasms benign, malignant and unspecified (incl cysts and polyps) |
| Acral lentiginous melanoma stage III       | Skin melanomas (excl ocular) | Skin neoplasms malignant and unspecified | Neoplasms benign, malignant and unspecified (incl cysts and polyps) |
| Acral lentiginous melanoma stage IV        | Skin melanomas (excl ocular) | Skin neoplasms malignant and unspecified | Neoplasms benign, malignant and unspecified (incl cysts and polyps) |
| Acute leukaemia                            | Leukaemias acute NEC         | Leukaemias                               | Neoplasms benign, malignant and unspecified (incl cysts and polyps) |
| Acute lymphocytic leukaemia                | Leukaemias acute lymphocytic | Leukaemias                               | Neoplasms benign, malignant and unspecified (incl cysts and polyps) |
| Acute lymphocytic leukaemia (in remission) | Leukaemias acute lymphocytic | Leukaemias                               | Neoplasms benign, malignant and unspecified (incl cysts and polyps) |
| Acute megakaryocytic leukaemia             | Leukaemias acute myeloid     | Leukaemias                               | Neoplasms benign, malignant and unspecified (incl cysts and polyps) |
| Acute monocytic leukaemia                  | Leukaemias acute myeloid     | Leukaemias                               | Neoplasms benign, malignant and unspecified (incl cysts and polyps) |
| Acute monocytic leukaemia (in remission)   | Leukaemias acute myeloid     | Leukaemias                               | Neoplasms benign, malignant and unspecified (incl cysts and polyps) |
| Acute myeloid leukaemia                    | Leukaemias acute myeloid     | Leukaemias                               | Neoplasms benign, malignant and unspecified (incl cysts and polyps) |
| Acute myeloid leukaemia (in remission)     | Leukaemias acute myeloid     | Leukaemias                               | Neoplasms benign, malignant and unspecified (incl cysts and polyps) |

|                                          |                                                                                 |                                                                        |                                                                     |
|------------------------------------------|---------------------------------------------------------------------------------|------------------------------------------------------------------------|---------------------------------------------------------------------|
|                                          |                                                                                 |                                                                        | unspecified (incl cysts and polyps)                                 |
| Acute myelomonocytic leukaemia           | Leukaemias acute myeloid                                                        | Leukaemias                                                             | Neoplasms benign, malignant and unspecified (incl cysts and polyps) |
| Acute promyelocytic leukaemia            | Leukaemias acute myeloid                                                        | Leukaemias                                                             | Neoplasms benign, malignant and unspecified (incl cysts and polyps) |
| Adenocarcinoma                           | Neoplasms malignant site unspecified NEC                                        | Miscellaneous and site unspecified neoplasms malignant and unspecified | Neoplasms benign, malignant and unspecified (incl cysts and polyps) |
| Adenocarcinoma gastric                   | Gastric neoplasms malignant                                                     | Gastrointestinal neoplasms malignant and unspecified                   | Neoplasms benign, malignant and unspecified (incl cysts and polyps) |
| Adenocarcinoma of colon                  | Colorectal neoplasms malignant                                                  | Gastrointestinal neoplasms malignant and unspecified                   | Neoplasms benign, malignant and unspecified (incl cysts and polyps) |
| Adenocarcinoma of the cervix             | Cervix neoplasms malignant                                                      | Reproductive neoplasms female malignant and unspecified                | Neoplasms benign, malignant and unspecified (incl cysts and polyps) |
| Adenosquamous carcinoma of the cervix    | Cervix neoplasms malignant                                                      | Reproductive neoplasms female malignant and unspecified                | Neoplasms benign, malignant and unspecified (incl cysts and polyps) |
| Adenosquamous cell lung cancer           | Non-small cell neoplasms malignant of the respiratory tract cell type specified | Respiratory and mediastinal neoplasms malignant and unspecified        | Neoplasms benign, malignant and unspecified (incl cysts and polyps) |
| Adenosquamous cell lung cancer recurrent | Non-small cell neoplasms malignant of the respiratory tract cell type specified | Respiratory and mediastinal neoplasms malignant and unspecified        | Neoplasms benign, malignant and unspecified (incl cysts and polyps) |
| Adenosquamous cell lung cancer stage 0   | Non-small cell neoplasms malignant of the respiratory tract cell type specified | Respiratory and mediastinal neoplasms malignant and unspecified        | Neoplasms benign, malignant and unspecified (incl cysts and polyps) |
| Adenosquamous cell lung cancer stage I   | Non-small cell neoplasms malignant of the respiratory tract cell type specified | Respiratory and mediastinal neoplasms malignant and unspecified        | Neoplasms benign, malignant and unspecified (incl cysts and polyps) |
| Adenosquamous cell lung cancer stage II  | Non-small cell neoplasms malignant of the respiratory tract cell type specified | Respiratory and mediastinal neoplasms malignant and unspecified        | Neoplasms benign, malignant and unspecified (incl cysts and polyps) |
| Adenosquamous cell lung cancer stage III | Non-small cell neoplasms malignant of the respiratory tract cell type specified | Respiratory and mediastinal neoplasms malignant and unspecified        | Neoplasms benign, malignant and unspecified (incl cysts and polyps) |

|                                            |                                                                                 |                                                                 |                                                                     |
|--------------------------------------------|---------------------------------------------------------------------------------|-----------------------------------------------------------------|---------------------------------------------------------------------|
| Adenosquamous cell lung cancer stage IV    | Non-small cell neoplasms malignant of the respiratory tract cell type specified | Respiratory and mediastinal neoplasms malignant and unspecified | Neoplasms benign, malignant and unspecified (incl cysts and polyps) |
| Adrenocortical carcinoma                   | Adrenal neoplasms malignant                                                     | Endocrine neoplasms malignant and unspecified                   | Neoplasms benign, malignant and unspecified (incl cysts and polyps) |
| Adult T-cell lymphoma/leukaemia            | Adult T-cell lymphomas/leukaemias                                               | Lymphomas non-Hodgkin's T-cell                                  | Neoplasms benign, malignant and unspecified (incl cysts and polyps) |
| Adult T-cell lymphoma/leukaemia recurrent  | Adult T-cell lymphomas/leukaemias                                               | Lymphomas non-Hodgkin's T-cell                                  | Neoplasms benign, malignant and unspecified (incl cysts and polyps) |
| Adult T-cell lymphoma/leukaemia refractory | Adult T-cell lymphomas/leukaemias                                               | Lymphomas non-Hodgkin's T-cell                                  | Neoplasms benign, malignant and unspecified (incl cysts and polyps) |
| Adult T-cell lymphoma/leukaemia stage I    | Adult T-cell lymphomas/leukaemias                                               | Lymphomas non-Hodgkin's T-cell                                  | Neoplasms benign, malignant and unspecified (incl cysts and polyps) |
| Adult T-cell lymphoma/leukaemia stage II   | Adult T-cell lymphomas/leukaemias                                               | Lymphomas non-Hodgkin's T-cell                                  | Neoplasms benign, malignant and unspecified (incl cysts and polyps) |
| Adult T-cell lymphoma/leukaemia stage III  | Adult T-cell lymphomas/leukaemias                                               | Lymphomas non-Hodgkin's T-cell                                  | Neoplasms benign, malignant and unspecified (incl cysts and polyps) |
| Adult T-cell lymphoma/leukaemia stage IV   | Adult T-cell lymphomas/leukaemias                                               | Lymphomas non-Hodgkin's T-cell                                  | Neoplasms benign, malignant and unspecified (incl cysts and polyps) |
| Aesthesioneuroblastoma                     | Nervous system neoplasms malignant NEC                                          | Nervous system neoplasms malignant and unspecified NEC          | Neoplasms benign, malignant and unspecified (incl cysts and polyps) |
| Aleukaemic leukaemia                       | Leukaemias NEC                                                                  | Leukaemias                                                      | Neoplasms benign, malignant and unspecified (incl cysts and polyps) |
| Alveolar soft part sarcoma                 | Alveolar soft part sarcomas                                                     | Soft tissue neoplasms malignant and unspecified                 | Neoplasms benign, malignant and unspecified (incl cysts and polyps) |
| Alveolar soft part sarcoma metastatic      | Alveolar soft part sarcomas                                                     | Soft tissue neoplasms malignant and unspecified                 | Neoplasms benign, malignant and unspecified (incl cysts and polyps) |
| Alveolar soft part sarcoma recurrent       | Alveolar soft part sarcomas                                                     | Soft tissue neoplasms malignant and unspecified                 | Neoplasms benign, malignant and unspecified (incl cysts and polyps) |



|                                                                  |                                                        |                                                        |                                                                     |
|------------------------------------------------------------------|--------------------------------------------------------|--------------------------------------------------------|---------------------------------------------------------------------|
| Anal cancer recurrent                                            | Anal canal neoplasms malignant                         | Gastrointestinal neoplasms malignant and unspecified   | Neoplasms benign, malignant and unspecified (incl cysts and polyps) |
| Anal cancer stage 0                                              | Anal canal neoplasms malignant                         | Gastrointestinal neoplasms malignant and unspecified   | Neoplasms benign, malignant and unspecified (incl cysts and polyps) |
| Anal cancer stage I                                              | Anal canal neoplasms malignant                         | Gastrointestinal neoplasms malignant and unspecified   | Neoplasms benign, malignant and unspecified (incl cysts and polyps) |
| Anal cancer stage II                                             | Anal canal neoplasms malignant                         | Gastrointestinal neoplasms malignant and unspecified   | Neoplasms benign, malignant and unspecified (incl cysts and polyps) |
| Anal cancer stage III                                            | Anal canal neoplasms malignant                         | Gastrointestinal neoplasms malignant and unspecified   | Neoplasms benign, malignant and unspecified (incl cysts and polyps) |
| Anal cancer stage IV                                             | Anal canal neoplasms malignant                         | Gastrointestinal neoplasms malignant and unspecified   | Neoplasms benign, malignant and unspecified (incl cysts and polyps) |
| Anaplastic astrocytoma                                           | Glial tumours malignant                                | Nervous system neoplasms malignant and unspecified NEC | Neoplasms benign, malignant and unspecified (incl cysts and polyps) |
| Anaplastic large cell lymphoma T- and null-cell types            | Anaplastic large cell lymphomas T- and null-cell types | Lymphomas non-Hodgkin's T-cell                         | Neoplasms benign, malignant and unspecified (incl cysts and polyps) |
| Anaplastic large cell lymphoma T- and null-cell types recurrent  | Anaplastic large cell lymphomas T- and null-cell types | Lymphomas non-Hodgkin's T-cell                         | Neoplasms benign, malignant and unspecified (incl cysts and polyps) |
| Anaplastic large cell lymphoma T- and null-cell types refractory | Anaplastic large cell lymphomas T- and null-cell types | Lymphomas non-Hodgkin's T-cell                         | Neoplasms benign, malignant and unspecified (incl cysts and polyps) |
| Anaplastic large cell lymphoma T- and null-cell types stage I    | Anaplastic large cell lymphomas T- and null-cell types | Lymphomas non-Hodgkin's T-cell                         | Neoplasms benign, malignant and unspecified (incl cysts and polyps) |
| Anaplastic large cell lymphoma T- and null-cell types stage II   | Anaplastic large cell lymphomas T- and null-cell types | Lymphomas non-Hodgkin's T-cell                         | Neoplasms benign, malignant and unspecified (incl cysts and polyps) |
| Anaplastic large cell lymphoma T- and null-cell types stage III  | Anaplastic large cell lymphomas T- and null-cell types | Lymphomas non-Hodgkin's T-cell                         | Neoplasms benign, malignant and unspecified (incl cysts and polyps) |
| Anaplastic large cell lymphoma T- and null-cell types stage IV   | Anaplastic large cell lymphomas T- and null-cell types | Lymphomas non-Hodgkin's T-cell                         | Neoplasms benign, malignant and unspecified (incl cysts and polyps) |

|                                               |                                     |                                               |                                                                     |
|-----------------------------------------------|-------------------------------------|-----------------------------------------------|---------------------------------------------------------------------|
| Anaplastic thyroid cancer                     | Thyroid neoplasms malignant         | Endocrine neoplasms malignant and unspecified | Neoplasms benign, malignant and unspecified (incl cysts and polyps) |
| Angiocentric lymphoma                         | Angiocentric lymphomas              | Lymphomas non-Hodgkin's T-cell                | Neoplasms benign, malignant and unspecified (incl cysts and polyps) |
| Angiocentric lymphoma recurrent               | Angiocentric lymphomas              | Lymphomas non-Hodgkin's T-cell                | Neoplasms benign, malignant and unspecified (incl cysts and polyps) |
| Angiocentric lymphoma refractory              | Angiocentric lymphomas              | Lymphomas non-Hodgkin's T-cell                | Neoplasms benign, malignant and unspecified (incl cysts and polyps) |
| Angiocentric lymphoma stage I                 | Angiocentric lymphomas              | Lymphomas non-Hodgkin's T-cell                | Neoplasms benign, malignant and unspecified (incl cysts and polyps) |
| Angiocentric lymphoma stage II                | Angiocentric lymphomas              | Lymphomas non-Hodgkin's T-cell                | Neoplasms benign, malignant and unspecified (incl cysts and polyps) |
| Angiocentric lymphoma stage III               | Angiocentric lymphomas              | Lymphomas non-Hodgkin's T-cell                | Neoplasms benign, malignant and unspecified (incl cysts and polyps) |
| Angiocentric lymphoma stage IV                | Angiocentric lymphomas              | Lymphomas non-Hodgkin's T-cell                | Neoplasms benign, malignant and unspecified (incl cysts and polyps) |
| Angioimmunoblastic T-cell lymphoma            | Angioimmunoblastic T-cell lymphomas | Lymphomas non-Hodgkin's T-cell                | Neoplasms benign, malignant and unspecified (incl cysts and polyps) |
| Angioimmunoblastic T-cell lymphoma recurrent  | Angioimmunoblastic T-cell lymphomas | Lymphomas non-Hodgkin's T-cell                | Neoplasms benign, malignant and unspecified (incl cysts and polyps) |
| Angioimmunoblastic T-cell lymphoma refractory | Angioimmunoblastic T-cell lymphomas | Lymphomas non-Hodgkin's T-cell                | Neoplasms benign, malignant and unspecified (incl cysts and polyps) |
| Angioimmunoblastic T-cell lymphoma stage I    | Angioimmunoblastic T-cell lymphomas | Lymphomas non-Hodgkin's T-cell                | Neoplasms benign, malignant and unspecified (incl cysts and polyps) |
| Angioimmunoblastic T-cell lymphoma stage II   | Angioimmunoblastic T-cell lymphomas | Lymphomas non-Hodgkin's T-cell                | Neoplasms benign, malignant and unspecified (incl cysts and polyps) |
| Angioimmunoblastic T-cell lymphoma stage III  | Angioimmunoblastic T-cell lymphomas | Lymphomas non-Hodgkin's T-cell                | Neoplasms benign, malignant and unspecified (incl cysts and polyps) |

|                                             |                                                     |                                                                        |                                                                     |
|---------------------------------------------|-----------------------------------------------------|------------------------------------------------------------------------|---------------------------------------------------------------------|
| Angioimmunoblastic T-cell lymphoma stage IV | Angioimmunoblastic T-cell lymphomas                 | Lymphomas non-Hodgkin's T-cell                                         | Neoplasms benign, malignant and unspecified (incl cysts and polyps) |
| Angiosarcoma                                | Cardiovascular neoplasms malignant and unspecified  | Miscellaneous and site unspecified neoplasms malignant and unspecified | Neoplasms benign, malignant and unspecified (incl cysts and polyps) |
| Angiosarcoma metastatic                     | Cardiovascular neoplasms malignant and unspecified  | Miscellaneous and site unspecified neoplasms malignant and unspecified | Neoplasms benign, malignant and unspecified (incl cysts and polyps) |
| Angiosarcoma recurrent                      | Cardiovascular neoplasms malignant and unspecified  | Miscellaneous and site unspecified neoplasms malignant and unspecified | Neoplasms benign, malignant and unspecified (incl cysts and polyps) |
| Astrocytoma                                 | Nervous system neoplasms unspecified malignancy NEC | Nervous system neoplasms malignant and unspecified NEC                 | Neoplasms benign, malignant and unspecified (incl cysts and polyps) |
| B precursor type acute leukaemia            | Leukaemias acute lymphocytic                        | Leukaemias                                                             | Neoplasms benign, malignant and unspecified (incl cysts and polyps) |
| B-cell lymphoma                             | B-cell lymphomas NEC                                | Lymphomas non-Hodgkin's B-cell                                         | Neoplasms benign, malignant and unspecified (incl cysts and polyps) |
| B-cell lymphoma recurrent                   | B-cell lymphomas NEC                                | Lymphomas non-Hodgkin's B-cell                                         | Neoplasms benign, malignant and unspecified (incl cysts and polyps) |
| B-cell lymphoma refractory                  | B-cell lymphomas NEC                                | Lymphomas non-Hodgkin's B-cell                                         | Neoplasms benign, malignant and unspecified (incl cysts and polyps) |
| B-cell lymphoma stage I                     | B-cell lymphomas NEC                                | Lymphomas non-Hodgkin's B-cell                                         | Neoplasms benign, malignant and unspecified (incl cysts and polyps) |
| B-cell lymphoma stage II                    | B-cell lymphomas NEC                                | Lymphomas non-Hodgkin's B-cell                                         | Neoplasms benign, malignant and unspecified (incl cysts and polyps) |
| B-cell lymphoma stage III                   | B-cell lymphomas NEC                                | Lymphomas non-Hodgkin's B-cell                                         | Neoplasms benign, malignant and unspecified (incl cysts and polyps) |
| B-cell lymphoma stage IV                    | B-cell lymphomas NEC                                | Lymphomas non-Hodgkin's B-cell                                         | Neoplasms benign, malignant and unspecified (incl cysts and polyps) |
| B-cell small lymphocytic lymphoma           | B-cell small lymphocytic lymphomas                  | Lymphomas non-Hodgkin's B-cell                                         | Neoplasms benign, malignant and unspecified (incl cysts and polyps) |

|                                              |                                                          |                                                                        |                                                                     |
|----------------------------------------------|----------------------------------------------------------|------------------------------------------------------------------------|---------------------------------------------------------------------|
| B-cell small lymphocytic lymphoma recurrent  | B-cell small lymphocytic lymphomas                       | Lymphomas non-Hodgkin's B-cell                                         | Neoplasms benign, malignant and unspecified (incl cysts and polyps) |
| B-cell small lymphocytic lymphoma refractory | B-cell small lymphocytic lymphomas                       | Lymphomas non-Hodgkin's B-cell                                         | Neoplasms benign, malignant and unspecified (incl cysts and polyps) |
| B-cell small lymphocytic lymphoma stage I    | B-cell small lymphocytic lymphomas                       | Lymphomas non-Hodgkin's B-cell                                         | Neoplasms benign, malignant and unspecified (incl cysts and polyps) |
| B-cell small lymphocytic lymphoma stage II   | B-cell small lymphocytic lymphomas                       | Lymphomas non-Hodgkin's B-cell                                         | Neoplasms benign, malignant and unspecified (incl cysts and polyps) |
| B-cell small lymphocytic lymphoma stage III  | B-cell small lymphocytic lymphomas                       | Lymphomas non-Hodgkin's B-cell                                         | Neoplasms benign, malignant and unspecified (incl cysts and polyps) |
| B-cell small lymphocytic lymphoma stage IV   | B-cell small lymphocytic lymphomas                       | Lymphomas non-Hodgkin's B-cell                                         | Neoplasms benign, malignant and unspecified (incl cysts and polyps) |
| B-cell type acute leukaemia                  | Leukaemias acute lymphocytic                             | Leukaemias                                                             | Neoplasms benign, malignant and unspecified (incl cysts and polyps) |
| B-cell unclassifiable lymphoma high grade    | B-cell unclassifiable lymphomas                          | Lymphomas non-Hodgkin's B-cell                                         | Neoplasms benign, malignant and unspecified (incl cysts and polyps) |
| B-cell unclassifiable lymphoma low grade     | B-cell unclassifiable lymphomas                          | Lymphomas non-Hodgkin's B-cell                                         | Neoplasms benign, malignant and unspecified (incl cysts and polyps) |
| Basal cell carcinoma                         | Skin neoplasms malignant and unspecified (excl melanoma) | Skin neoplasms malignant and unspecified                               | Neoplasms benign, malignant and unspecified (incl cysts and polyps) |
| Basosquamous carcinoma                       | Neoplasms malignant site unspecified NEC                 | Miscellaneous and site unspecified neoplasms malignant and unspecified | Neoplasms benign, malignant and unspecified (incl cysts and polyps) |
| Basosquamous carcinoma of skin               | Skin neoplasms malignant and unspecified (excl melanoma) | Skin neoplasms malignant and unspecified                               | Neoplasms benign, malignant and unspecified (incl cysts and polyps) |
| Bile duct adenocarcinoma                     | Bile duct neoplasms malignant                            | Hepatobiliary neoplasms malignant and unspecified                      | Neoplasms benign, malignant and unspecified (incl cysts and polyps) |
| Bile duct adenosquamous carcinoma            | Bile duct neoplasms malignant                            | Hepatobiliary neoplasms malignant and unspecified                      | Neoplasms benign, malignant and unspecified (incl cysts and polyps) |

|                                                |                               |                                                             |                                                                     |
|------------------------------------------------|-------------------------------|-------------------------------------------------------------|---------------------------------------------------------------------|
| Bile duct cancer                               | Bile duct neoplasms malignant | Hepatobiliary neoplasms malignant and unspecified           | Neoplasms benign, malignant and unspecified (incl cysts and polyps) |
| Bile duct cancer recurrent                     | Bile duct neoplasms malignant | Hepatobiliary neoplasms malignant and unspecified           | Neoplasms benign, malignant and unspecified (incl cysts and polyps) |
| Bile duct squamous cell carcinoma              | Bile duct neoplasms malignant | Hepatobiliary neoplasms malignant and unspecified           | Neoplasms benign, malignant and unspecified (incl cysts and polyps) |
| Bladder adenocarcinoma recurrent               | Bladder neoplasms malignant   | Renal and urinary tract neoplasms malignant and unspecified | Neoplasms benign, malignant and unspecified (incl cysts and polyps) |
| Bladder adenocarcinoma stage 0                 | Bladder neoplasms malignant   | Renal and urinary tract neoplasms malignant and unspecified | Neoplasms benign, malignant and unspecified (incl cysts and polyps) |
| Bladder adenocarcinoma stage I                 | Bladder neoplasms malignant   | Renal and urinary tract neoplasms malignant and unspecified | Neoplasms benign, malignant and unspecified (incl cysts and polyps) |
| Bladder adenocarcinoma stage II                | Bladder neoplasms malignant   | Renal and urinary tract neoplasms malignant and unspecified | Neoplasms benign, malignant and unspecified (incl cysts and polyps) |
| Bladder adenocarcinoma stage III               | Bladder neoplasms malignant   | Renal and urinary tract neoplasms malignant and unspecified | Neoplasms benign, malignant and unspecified (incl cysts and polyps) |
| Bladder adenocarcinoma stage IV                | Bladder neoplasms malignant   | Renal and urinary tract neoplasms malignant and unspecified | Neoplasms benign, malignant and unspecified (incl cysts and polyps) |
| Bladder adenocarcinoma stage unspecified       | Bladder neoplasms malignant   | Renal and urinary tract neoplasms malignant and unspecified | Neoplasms benign, malignant and unspecified (incl cysts and polyps) |
| Bladder cancer                                 | Bladder neoplasms malignant   | Renal and urinary tract neoplasms malignant and unspecified | Neoplasms benign, malignant and unspecified (incl cysts and polyps) |
| Bladder cancer recurrent                       | Bladder neoplasms malignant   | Renal and urinary tract neoplasms malignant and unspecified | Neoplasms benign, malignant and unspecified (incl cysts and polyps) |
| Bladder cancer stage 0, with cancer in situ    | Bladder neoplasms malignant   | Renal and urinary tract neoplasms malignant and unspecified | Neoplasms benign, malignant and unspecified (incl cysts and polyps) |
| Bladder cancer stage 0, without cancer in situ | Bladder neoplasms malignant   | Renal and urinary tract neoplasms malignant and unspecified | Neoplasms benign, malignant and unspecified (incl cysts and polyps) |

|                                                   |                                          |                                                             |                                                                     |
|---------------------------------------------------|------------------------------------------|-------------------------------------------------------------|---------------------------------------------------------------------|
| Bladder cancer stage I, with cancer in situ       | Bladder neoplasms malignant              | Renal and urinary tract neoplasms malignant and unspecified | Neoplasms benign, malignant and unspecified (incl cysts and polyps) |
| Bladder cancer stage I, without cancer in situ    | Bladder neoplasms malignant              | Renal and urinary tract neoplasms malignant and unspecified | Neoplasms benign, malignant and unspecified (incl cysts and polyps) |
| Bladder cancer stage II                           | Bladder neoplasms malignant              | Renal and urinary tract neoplasms malignant and unspecified | Neoplasms benign, malignant and unspecified (incl cysts and polyps) |
| Bladder cancer stage III                          | Bladder neoplasms malignant              | Renal and urinary tract neoplasms malignant and unspecified | Neoplasms benign, malignant and unspecified (incl cysts and polyps) |
| Bladder cancer stage IV                           | Bladder neoplasms malignant              | Renal and urinary tract neoplasms malignant and unspecified | Neoplasms benign, malignant and unspecified (incl cysts and polyps) |
| Bladder squamous cell carcinoma recurrent         | Bladder neoplasms malignant              | Renal and urinary tract neoplasms malignant and unspecified | Neoplasms benign, malignant and unspecified (incl cysts and polyps) |
| Bladder squamous cell carcinoma stage 0           | Bladder neoplasms malignant              | Renal and urinary tract neoplasms malignant and unspecified | Neoplasms benign, malignant and unspecified (incl cysts and polyps) |
| Bladder squamous cell carcinoma stage I           | Bladder neoplasms malignant              | Renal and urinary tract neoplasms malignant and unspecified | Neoplasms benign, malignant and unspecified (incl cysts and polyps) |
| Bladder squamous cell carcinoma stage II          | Bladder neoplasms malignant              | Renal and urinary tract neoplasms malignant and unspecified | Neoplasms benign, malignant and unspecified (incl cysts and polyps) |
| Bladder squamous cell carcinoma stage III         | Bladder neoplasms malignant              | Renal and urinary tract neoplasms malignant and unspecified | Neoplasms benign, malignant and unspecified (incl cysts and polyps) |
| Bladder squamous cell carcinoma stage IV          | Bladder neoplasms malignant              | Renal and urinary tract neoplasms malignant and unspecified | Neoplasms benign, malignant and unspecified (incl cysts and polyps) |
| Bladder squamous cell carcinoma stage unspecified | Bladder neoplasms malignant              | Renal and urinary tract neoplasms malignant and unspecified | Neoplasms benign, malignant and unspecified (incl cysts and polyps) |
| Bladder transitional cell carcinoma               | Bladder neoplasms malignant              | Renal and urinary tract neoplasms malignant and unspecified | Neoplasms benign, malignant and unspecified (incl cysts and polyps) |
| Bone cancer                                       | Bone neoplasms malignant (excl sarcomas) | Skeletal neoplasms malignant and unspecified                | Neoplasms benign, malignant and unspecified (incl cysts and polyps) |

|                              |                                                                             |                                                                 |                                                                     |
|------------------------------|-----------------------------------------------------------------------------|-----------------------------------------------------------------|---------------------------------------------------------------------|
| Bone sarcoma                 | Bone sarcomas                                                               | Skeletal neoplasms malignant and unspecified                    | Neoplasms benign, malignant and unspecified (incl cysts and polyps) |
| Bowen's disease              | Skin neoplasms malignant and unspecified (excl melanoma)                    | Skin neoplasms malignant and unspecified                        | Neoplasms benign, malignant and unspecified (incl cysts and polyps) |
| Brain neoplasm malignant     | Central nervous system neoplasms malignant NEC                              | Nervous system neoplasms malignant and unspecified NEC          | Neoplasms benign, malignant and unspecified (incl cysts and polyps) |
| Brain stem glioma            | Glial tumours malignant                                                     | Nervous system neoplasms malignant and unspecified NEC          | Neoplasms benign, malignant and unspecified (incl cysts and polyps) |
| Breast cancer                | Breast and nipple neoplasms malignant                                       | Breast neoplasms malignant and unspecified (incl nipple)        | Neoplasms benign, malignant and unspecified (incl cysts and polyps) |
| Breast cancer in situ        | Breast and nipple neoplasms malignant                                       | Breast neoplasms malignant and unspecified (incl nipple)        | Neoplasms benign, malignant and unspecified (incl cysts and polyps) |
| Breast cancer recurrent      | Breast and nipple neoplasms malignant                                       | Breast neoplasms malignant and unspecified (incl nipple)        | Neoplasms benign, malignant and unspecified (incl cysts and polyps) |
| Breast cancer stage I        | Breast and nipple neoplasms malignant                                       | Breast neoplasms malignant and unspecified (incl nipple)        | Neoplasms benign, malignant and unspecified (incl cysts and polyps) |
| Breast cancer stage II       | Breast and nipple neoplasms malignant                                       | Breast neoplasms malignant and unspecified (incl nipple)        | Neoplasms benign, malignant and unspecified (incl cysts and polyps) |
| Breast cancer stage III      | Breast and nipple neoplasms malignant                                       | Breast neoplasms malignant and unspecified (incl nipple)        | Neoplasms benign, malignant and unspecified (incl cysts and polyps) |
| Breast cancer stage IV       | Breast and nipple neoplasms malignant                                       | Breast neoplasms malignant and unspecified (incl nipple)        | Neoplasms benign, malignant and unspecified (incl cysts and polyps) |
| Bronchial carcinoma          | Respiratory tract and pleural neoplasms malignant cell type unspecified NEC | Respiratory and mediastinal neoplasms malignant and unspecified | Neoplasms benign, malignant and unspecified (incl cysts and polyps) |
| Burkitt's lymphoma           | Burkitt's lymphomas                                                         | Lymphomas non-Hodgkin's B-cell                                  | Neoplasms benign, malignant and unspecified (incl cysts and polyps) |
| Burkitt's lymphoma recurrent | Burkitt's lymphomas                                                         | Lymphomas non-Hodgkin's B-cell                                  | Neoplasms benign, malignant and unspecified (incl cysts and polyps) |

|                                                |                                             |                                               |                                                                     |
|------------------------------------------------|---------------------------------------------|-----------------------------------------------|---------------------------------------------------------------------|
| Burkitt's lymphoma refractory                  | Burkitt's lymphomas                         | Lymphomas non-Hodgkin's B-cell                | Neoplasms benign, malignant and unspecified (incl cysts and polyps) |
| Burkitt's lymphoma stage I                     | Burkitt's lymphomas                         | Lymphomas non-Hodgkin's B-cell                | Neoplasms benign, malignant and unspecified (incl cysts and polyps) |
| Burkitt's lymphoma stage II                    | Burkitt's lymphomas                         | Lymphomas non-Hodgkin's B-cell                | Neoplasms benign, malignant and unspecified (incl cysts and polyps) |
| Burkitt's lymphoma stage III                   | Burkitt's lymphomas                         | Lymphomas non-Hodgkin's B-cell                | Neoplasms benign, malignant and unspecified (incl cysts and polyps) |
| Burkitt's lymphoma stage IV                    | Burkitt's lymphomas                         | Lymphomas non-Hodgkin's B-cell                | Neoplasms benign, malignant and unspecified (incl cysts and polyps) |
| Carcinogenicity                                | Poisoning and toxicity                      | Exposures, chemical injuries and poisoning    | Injury, poisoning and procedural complications                      |
| Carcinoid tumour                               | Carcinoid tumours                           | Endocrine neoplasms malignant and unspecified | Neoplasms benign, malignant and unspecified (incl cysts and polyps) |
| Carcinoid tumour of the appendix               | Carcinoid tumours                           | Endocrine neoplasms malignant and unspecified | Neoplasms benign, malignant and unspecified (incl cysts and polyps) |
| Carcinoid tumour of the caecum                 | Carcinoid tumours                           | Endocrine neoplasms malignant and unspecified | Neoplasms benign, malignant and unspecified (incl cysts and polyps) |
| Carcinoid tumour of the gastrointestinal tract | Carcinoid tumours                           | Endocrine neoplasms malignant and unspecified | Neoplasms benign, malignant and unspecified (incl cysts and polyps) |
| Carcinoid tumour of the prostate               | Carcinoid tumours                           | Endocrine neoplasms malignant and unspecified | Neoplasms benign, malignant and unspecified (incl cysts and polyps) |
| Carcinoid tumour of the stomach                | Carcinoid tumours                           | Endocrine neoplasms malignant and unspecified | Neoplasms benign, malignant and unspecified (incl cysts and polyps) |
| Carcinoid tumour pulmonary                     | Carcinoid tumours                           | Endocrine neoplasms malignant and unspecified | Neoplasms benign, malignant and unspecified (incl cysts and polyps) |
| Carcinoma in situ of eye                       | Ocular neoplasms malignant (excl melanomas) | Ocular neoplasms                              | Neoplasms benign, malignant and unspecified (incl cysts and polyps) |



|                                 |                                                                             |                                                                 |                                                                     |
|---------------------------------|-----------------------------------------------------------------------------|-----------------------------------------------------------------|---------------------------------------------------------------------|
| Carcinoma in situ of penis      | Penile neoplasms malignant                                                  | Reproductive neoplasms male malignant and unspecified           | Neoplasms benign, malignant and unspecified (incl cysts and polyps) |
| Carcinoma in situ of skin       | Skin neoplasms malignant and unspecified (excl melanoma)                    | Skin neoplasms malignant and unspecified                        | Neoplasms benign, malignant and unspecified (incl cysts and polyps) |
| Carcinoma in situ of trachea    | Respiratory tract and pleural neoplasms malignant cell type unspecified NEC | Respiratory and mediastinal neoplasms malignant and unspecified | Neoplasms benign, malignant and unspecified (incl cysts and polyps) |
| Central nervous system lymphoma | Lymphomas unspecified NEC                                                   | Lymphomas NEC                                                   | Neoplasms benign, malignant and unspecified (incl cysts and polyps) |
| Cervix carcinoma                | Cervix neoplasms malignant                                                  | Reproductive neoplasms female malignant and unspecified         | Neoplasms benign, malignant and unspecified (incl cysts and polyps) |
| Cervix carcinoma recurrent      | Cervix neoplasms malignant                                                  | Reproductive neoplasms female malignant and unspecified         | Neoplasms benign, malignant and unspecified (incl cysts and polyps) |
| Cervix carcinoma stage I        | Cervix neoplasms malignant                                                  | Reproductive neoplasms female malignant and unspecified         | Neoplasms benign, malignant and unspecified (incl cysts and polyps) |
| Cervix carcinoma stage II       | Cervix neoplasms malignant                                                  | Reproductive neoplasms female malignant and unspecified         | Neoplasms benign, malignant and unspecified (incl cysts and polyps) |
| Cervix carcinoma stage III      | Cervix neoplasms malignant                                                  | Reproductive neoplasms female malignant and unspecified         | Neoplasms benign, malignant and unspecified (incl cysts and polyps) |
| Cervix carcinoma stage IV       | Cervix neoplasms malignant                                                  | Reproductive neoplasms female malignant and unspecified         | Neoplasms benign, malignant and unspecified (incl cysts and polyps) |
| Chloroma                        | Leukaemias myeloid NEC                                                      | Leukaemias                                                      | Neoplasms benign, malignant and unspecified (incl cysts and polyps) |
| Chloroma (in remission)         | Leukaemias myeloid NEC                                                      | Leukaemias                                                      | Neoplasms benign, malignant and unspecified (incl cysts and polyps) |
| Cholangiocarcinoma              | Bile duct neoplasms malignant                                               | Hepatobiliary neoplasms malignant and unspecified               | Neoplasms benign, malignant and unspecified (incl cysts and polyps) |
| Chondrosarcoma                  | Cartilage sarcomas                                                          | Skeletal neoplasms malignant and unspecified                    | Neoplasms benign, malignant and unspecified (incl cysts and polyps) |

|                                              |                                          |                                                                        |                                                                     |
|----------------------------------------------|------------------------------------------|------------------------------------------------------------------------|---------------------------------------------------------------------|
| Chondrosarcoma metastatic                    | Cartilage sarcomas                       | Skeletal neoplasms malignant and unspecified                           | Neoplasms benign, malignant and unspecified (incl cysts and polyps) |
| Chondrosarcoma recurrent                     | Cartilage sarcomas                       | Skeletal neoplasms malignant and unspecified                           | Neoplasms benign, malignant and unspecified (incl cysts and polyps) |
| Chordoma                                     | Bone neoplasms unspecified malignancy    | Skeletal neoplasms malignant and unspecified                           | Neoplasms benign, malignant and unspecified (incl cysts and polyps) |
| Choriocarcinoma                              | Germ cell neoplasms site unspecified NEC | Miscellaneous and site unspecified neoplasms malignant and unspecified | Neoplasms benign, malignant and unspecified (incl cysts and polyps) |
| Choroid melanoma                             | Ocular melanomas                         | Ocular neoplasms                                                       | Neoplasms benign, malignant and unspecified (incl cysts and polyps) |
| Chronic leukaemia                            | Leukaemias chronic NEC                   | Leukaemias                                                             | Neoplasms benign, malignant and unspecified (incl cysts and polyps) |
| Chronic lymphocytic leukaemia                | Leukaemias chronic lymphocytic           | Leukaemias                                                             | Neoplasms benign, malignant and unspecified (incl cysts and polyps) |
| Chronic lymphocytic leukaemia (in remission) | Leukaemias chronic lymphocytic           | Leukaemias                                                             | Neoplasms benign, malignant and unspecified (incl cysts and polyps) |
| Chronic lymphocytic leukaemia recurrent      | Leukaemias chronic lymphocytic           | Leukaemias                                                             | Neoplasms benign, malignant and unspecified (incl cysts and polyps) |
| Chronic lymphocytic leukaemia refractory     | Leukaemias chronic lymphocytic           | Leukaemias                                                             | Neoplasms benign, malignant and unspecified (incl cysts and polyps) |
| Chronic lymphocytic leukaemia stage 0        | Leukaemias chronic lymphocytic           | Leukaemias                                                             | Neoplasms benign, malignant and unspecified (incl cysts and polyps) |
| Chronic lymphocytic leukaemia stage 1        | Leukaemias chronic lymphocytic           | Leukaemias                                                             | Neoplasms benign, malignant and unspecified (incl cysts and polyps) |
| Chronic lymphocytic leukaemia stage 2        | Leukaemias chronic lymphocytic           | Leukaemias                                                             | Neoplasms benign, malignant and unspecified (incl cysts and polyps) |
| Chronic lymphocytic leukaemia stage 3        | Leukaemias chronic lymphocytic           | Leukaemias                                                             | Neoplasms benign, malignant and unspecified (incl cysts and polyps) |

|                                                 |                                 |                                                             |                                                                     |
|-------------------------------------------------|---------------------------------|-------------------------------------------------------------|---------------------------------------------------------------------|
| Chronic lymphocytic leukaemia stage 4           | Leukaemias chronic lymphocytic  | Leukaemias                                                  | Neoplasms benign, malignant and unspecified (incl cysts and polyps) |
| Chronic myeloid leukaemia                       | Leukaemias chronic myeloid      | Leukaemias                                                  | Neoplasms benign, malignant and unspecified (incl cysts and polyps) |
| Chronic myeloid leukaemia (in remission)        | Leukaemias chronic myeloid      | Leukaemias                                                  | Neoplasms benign, malignant and unspecified (incl cysts and polyps) |
| Chronic myelomonocytic leukaemia                | Myelodysplastic syndromes       | Leukaemias                                                  | Neoplasms benign, malignant and unspecified (incl cysts and polyps) |
| Chronic myelomonocytic leukaemia (in remission) | Myelodysplastic syndromes       | Leukaemias                                                  | Neoplasms benign, malignant and unspecified (incl cysts and polyps) |
| Clear cell endometrial carcinoma                | Endometrial neoplasms malignant | Reproductive neoplasms female malignant and unspecified     | Neoplasms benign, malignant and unspecified (incl cysts and polyps) |
| Clear cell sarcoma of the kidney                | Renal neoplasms malignant       | Renal and urinary tract neoplasms malignant and unspecified | Neoplasms benign, malignant and unspecified (incl cysts and polyps) |
| Colon cancer                                    | Colorectal neoplasms malignant  | Gastrointestinal neoplasms malignant and unspecified        | Neoplasms benign, malignant and unspecified (incl cysts and polyps) |
| Colon cancer recurrent                          | Colorectal neoplasms malignant  | Gastrointestinal neoplasms malignant and unspecified        | Neoplasms benign, malignant and unspecified (incl cysts and polyps) |
| Colon cancer stage I                            | Colorectal neoplasms malignant  | Gastrointestinal neoplasms malignant and unspecified        | Neoplasms benign, malignant and unspecified (incl cysts and polyps) |
| Colon cancer stage II                           | Colorectal neoplasms malignant  | Gastrointestinal neoplasms malignant and unspecified        | Neoplasms benign, malignant and unspecified (incl cysts and polyps) |
| Colon cancer stage III                          | Colorectal neoplasms malignant  | Gastrointestinal neoplasms malignant and unspecified        | Neoplasms benign, malignant and unspecified (incl cysts and polyps) |
| Colon cancer stage IV                           | Colorectal neoplasms malignant  | Gastrointestinal neoplasms malignant and unspecified        | Neoplasms benign, malignant and unspecified (incl cysts and polyps) |
| Colorectal cancer recurrent                     | Colorectal neoplasms malignant  | Gastrointestinal neoplasms malignant and unspecified        | Neoplasms benign, malignant and unspecified (incl cysts and polyps) |

|                                          |                                 |                                                         |                                                                     |
|------------------------------------------|---------------------------------|---------------------------------------------------------|---------------------------------------------------------------------|
| Colorectal cancer stage I                | Colorectal neoplasms malignant  | Gastrointestinal neoplasms malignant and unspecified    | Neoplasms benign, malignant and unspecified (incl cysts and polyps) |
| Colorectal cancer stage II               | Colorectal neoplasms malignant  | Gastrointestinal neoplasms malignant and unspecified    | Neoplasms benign, malignant and unspecified (incl cysts and polyps) |
| Colorectal cancer stage III              | Colorectal neoplasms malignant  | Gastrointestinal neoplasms malignant and unspecified    | Neoplasms benign, malignant and unspecified (incl cysts and polyps) |
| Colorectal cancer stage IV               | Colorectal neoplasms malignant  | Gastrointestinal neoplasms malignant and unspecified    | Neoplasms benign, malignant and unspecified (incl cysts and polyps) |
| Colorectal carcinoma stage 0             | Colorectal neoplasms malignant  | Gastrointestinal neoplasms malignant and unspecified    | Neoplasms benign, malignant and unspecified (incl cysts and polyps) |
| Diffuse large B-cell lymphoma            | Diffuse large B-cell lymphomas  | Lymphomas non-Hodgkin's B-cell                          | Neoplasms benign, malignant and unspecified (incl cysts and polyps) |
| Diffuse large B-cell lymphoma recurrent  | Diffuse large B-cell lymphomas  | Lymphomas non-Hodgkin's B-cell                          | Neoplasms benign, malignant and unspecified (incl cysts and polyps) |
| Diffuse large B-cell lymphoma refractory | Diffuse large B-cell lymphomas  | Lymphomas non-Hodgkin's B-cell                          | Neoplasms benign, malignant and unspecified (incl cysts and polyps) |
| Diffuse large B-cell lymphoma stage I    | Diffuse large B-cell lymphomas  | Lymphomas non-Hodgkin's B-cell                          | Neoplasms benign, malignant and unspecified (incl cysts and polyps) |
| Diffuse large B-cell lymphoma stage II   | Diffuse large B-cell lymphomas  | Lymphomas non-Hodgkin's B-cell                          | Neoplasms benign, malignant and unspecified (incl cysts and polyps) |
| Diffuse large B-cell lymphoma stage III  | Diffuse large B-cell lymphomas  | Lymphomas non-Hodgkin's B-cell                          | Neoplasms benign, malignant and unspecified (incl cysts and polyps) |
| Diffuse large B-cell lymphoma stage IV   | Diffuse large B-cell lymphomas  | Lymphomas non-Hodgkin's B-cell                          | Neoplasms benign, malignant and unspecified (incl cysts and polyps) |
| Endometrial adenocarcinoma               | Endometrial neoplasms malignant | Reproductive neoplasms female malignant and unspecified | Neoplasms benign, malignant and unspecified (incl cysts and polyps) |
| Endometrial cancer                       | Endometrial neoplasms malignant | Reproductive neoplasms female malignant and unspecified | Neoplasms benign, malignant and unspecified (incl cysts and polyps) |

|                                     |                                 |                                                         |                                                                     |
|-------------------------------------|---------------------------------|---------------------------------------------------------|---------------------------------------------------------------------|
| Endometrial cancer metastatic       | Endometrial neoplasms malignant | Reproductive neoplasms female malignant and unspecified | Neoplasms benign, malignant and unspecified (incl cysts and polyps) |
| Endometrial cancer recurrent        | Endometrial neoplasms malignant | Reproductive neoplasms female malignant and unspecified | Neoplasms benign, malignant and unspecified (incl cysts and polyps) |
| Endometrial cancer stage 0          | Endometrial neoplasms malignant | Reproductive neoplasms female malignant and unspecified | Neoplasms benign, malignant and unspecified (incl cysts and polyps) |
| Endometrial cancer stage I          | Endometrial neoplasms malignant | Reproductive neoplasms female malignant and unspecified | Neoplasms benign, malignant and unspecified (incl cysts and polyps) |
| Endometrial cancer stage II         | Endometrial neoplasms malignant | Reproductive neoplasms female malignant and unspecified | Neoplasms benign, malignant and unspecified (incl cysts and polyps) |
| Endometrial cancer stage III        | Endometrial neoplasms malignant | Reproductive neoplasms female malignant and unspecified | Neoplasms benign, malignant and unspecified (incl cysts and polyps) |
| Endometrial cancer stage IV         | Endometrial neoplasms malignant | Reproductive neoplasms female malignant and unspecified | Neoplasms benign, malignant and unspecified (incl cysts and polyps) |
| Eosinophilic leukaemia              | Leukaemias myeloid NEC          | Leukaemias                                              | Neoplasms benign, malignant and unspecified (incl cysts and polyps) |
| Ependymoma malignant                | Glial tumours malignant         | Nervous system neoplasms malignant and unspecified NEC  | Neoplasms benign, malignant and unspecified (incl cysts and polyps) |
| Epithelioid sarcoma                 | Epithelioid sarcomas            | Soft tissue neoplasms malignant and unspecified         | Neoplasms benign, malignant and unspecified (incl cysts and polyps) |
| Epithelioid sarcoma metastatic      | Epithelioid sarcomas            | Soft tissue neoplasms malignant and unspecified         | Neoplasms benign, malignant and unspecified (incl cysts and polyps) |
| Epithelioid sarcoma recurrent       | Epithelioid sarcomas            | Soft tissue neoplasms malignant and unspecified         | Neoplasms benign, malignant and unspecified (incl cysts and polyps) |
| Erythraemic myelosis (in remission) | Leukaemias acute myeloid        | Leukaemias                                              | Neoplasms benign, malignant and unspecified (incl cysts and polyps) |
| Erythroleukaemia                    | Leukaemias acute myeloid        | Leukaemias                                              | Neoplasms benign, malignant and unspecified (incl cysts and polyps) |

|                                                       |                                          |                                                                        |                                                                     |
|-------------------------------------------------------|------------------------------------------|------------------------------------------------------------------------|---------------------------------------------------------------------|
| Ewing's sarcoma                                       | Bone sarcomas                            | Skeletal neoplasms malignant and unspecified                           | Neoplasms benign, malignant and unspecified (incl cysts and polyps) |
| Ewing's sarcoma metastatic                            | Bone sarcomas                            | Skeletal neoplasms malignant and unspecified                           | Neoplasms benign, malignant and unspecified (incl cysts and polyps) |
| Ewing's sarcoma recurrent                             | Bone sarcomas                            | Skeletal neoplasms malignant and unspecified                           | Neoplasms benign, malignant and unspecified (incl cysts and polyps) |
| Extra-osseous Ewing's sarcoma                         | Extraskelletal Ewing's sarcomas          | Soft tissue neoplasms malignant and unspecified                        | Neoplasms benign, malignant and unspecified (incl cysts and polyps) |
| Extra-osseous Ewing's sarcoma metastatic              | Extraskelletal Ewing's sarcomas          | Soft tissue neoplasms malignant and unspecified                        | Neoplasms benign, malignant and unspecified (incl cysts and polyps) |
| Extra-osseous Ewing's sarcoma recurrent               | Extraskelletal Ewing's sarcomas          | Soft tissue neoplasms malignant and unspecified                        | Neoplasms benign, malignant and unspecified (incl cysts and polyps) |
| Extragonadal primary embryonal carcinoma              | Extragonadal primary germ cell neoplasms | Miscellaneous and site unspecified neoplasms malignant and unspecified | Neoplasms benign, malignant and unspecified (incl cysts and polyps) |
| Extragonadal primary germ cell tumour mixed stage I   | Extragonadal primary germ cell neoplasms | Miscellaneous and site unspecified neoplasms malignant and unspecified | Neoplasms benign, malignant and unspecified (incl cysts and polyps) |
| Extragonadal primary germ cell tumour mixed stage II  | Extragonadal primary germ cell neoplasms | Miscellaneous and site unspecified neoplasms malignant and unspecified | Neoplasms benign, malignant and unspecified (incl cysts and polyps) |
| Extragonadal primary germ cell tumour mixed stage III | Extragonadal primary germ cell neoplasms | Miscellaneous and site unspecified neoplasms malignant and unspecified | Neoplasms benign, malignant and unspecified (incl cysts and polyps) |
| Extragonadal primary non-seminoma stage I             | Extragonadal primary germ cell neoplasms | Miscellaneous and site unspecified neoplasms malignant and unspecified | Neoplasms benign, malignant and unspecified (incl cysts and polyps) |
| Extragonadal primary non-seminoma stage II            | Extragonadal primary germ cell neoplasms | Miscellaneous and site unspecified neoplasms malignant and unspecified | Neoplasms benign, malignant and unspecified (incl cysts and polyps) |
| Extragonadal primary non-seminoma stage III           | Extragonadal primary germ cell neoplasms | Miscellaneous and site unspecified neoplasms malignant and unspecified | Neoplasms benign, malignant and unspecified (incl cysts and polyps) |
| Extragonadal primary non-seminoma stage IV            | Extragonadal primary germ cell neoplasms | Miscellaneous and site unspecified neoplasms malignant and unspecified | Neoplasms benign, malignant and unspecified (incl cysts and polyps) |

|                                                                 |                                                              |                                                                        |                                                                     |
|-----------------------------------------------------------------|--------------------------------------------------------------|------------------------------------------------------------------------|---------------------------------------------------------------------|
| Extragenadal primary seminoma (pure) stage I                    | Extragenadal primary germ cell neoplasms                     | Miscellaneous and site unspecified neoplasms malignant and unspecified | Neoplasms benign, malignant and unspecified (incl cysts and polyps) |
| Extragenadal primary seminoma (pure) stage II                   | Extragenadal primary germ cell neoplasms                     | Miscellaneous and site unspecified neoplasms malignant and unspecified | Neoplasms benign, malignant and unspecified (incl cysts and polyps) |
| Extragenadal primary seminoma (pure) stage III                  | Extragenadal primary germ cell neoplasms                     | Miscellaneous and site unspecified neoplasms malignant and unspecified | Neoplasms benign, malignant and unspecified (incl cysts and polyps) |
| Extragenadal primary seminoma (pure) stage IV                   | Extragenadal primary germ cell neoplasms                     | Miscellaneous and site unspecified neoplasms malignant and unspecified | Neoplasms benign, malignant and unspecified (incl cysts and polyps) |
| Extranodal marginal zone B-cell lymphoma (MALT type) recurrent  | Extranodal marginal zone B-cell lymphomas (low grade B-cell) | Lymphomas non-Hodgkin's B-cell                                         | Neoplasms benign, malignant and unspecified (incl cysts and polyps) |
| Extranodal marginal zone B-cell lymphoma (MALT type) refractory | Extranodal marginal zone B-cell lymphomas (low grade B-cell) | Lymphomas non-Hodgkin's B-cell                                         | Neoplasms benign, malignant and unspecified (incl cysts and polyps) |
| Extranodal marginal zone B-cell lymphoma (MALT type) stage I    | Extranodal marginal zone B-cell lymphomas (low grade B-cell) | Lymphomas non-Hodgkin's B-cell                                         | Neoplasms benign, malignant and unspecified (incl cysts and polyps) |
| Extranodal marginal zone B-cell lymphoma (MALT type) stage II   | Extranodal marginal zone B-cell lymphomas (low grade B-cell) | Lymphomas non-Hodgkin's B-cell                                         | Neoplasms benign, malignant and unspecified (incl cysts and polyps) |
| Extranodal marginal zone B-cell lymphoma (MALT type) stage III  | Extranodal marginal zone B-cell lymphomas (low grade B-cell) | Lymphomas non-Hodgkin's B-cell                                         | Neoplasms benign, malignant and unspecified (incl cysts and polyps) |
| Extranodal marginal zone B-cell lymphoma (MALT type) stage IV   | Extranodal marginal zone B-cell lymphomas (low grade B-cell) | Lymphomas non-Hodgkin's B-cell                                         | Neoplasms benign, malignant and unspecified (incl cysts and polyps) |
| Extraocular retinoblastoma                                      | Ocular neoplasms malignant (excl melanomas)                  | Ocular neoplasms                                                       | Neoplasms benign, malignant and unspecified (incl cysts and polyps) |
| Extraskelatal chondrosarcoma metastatic                         | Extraskelatal chondrosarcomas                                | Soft tissue neoplasms malignant and unspecified                        | Neoplasms benign, malignant and unspecified (incl cysts and polyps) |
| Extraskelatal chondrosarcoma recurrent                          | Extraskelatal chondrosarcomas                                | Soft tissue neoplasms malignant and unspecified                        | Neoplasms benign, malignant and unspecified (incl cysts and polyps) |
| Extraskelatal osteosarcoma                                      | Extraskelatal osteosarcomas                                  | Soft tissue neoplasms malignant and unspecified                        | Neoplasms benign, malignant and unspecified (incl cysts and polyps) |

|                                                                 |                                                            |                                                         |                                                                     |
|-----------------------------------------------------------------|------------------------------------------------------------|---------------------------------------------------------|---------------------------------------------------------------------|
| Extraskelletal osteosarcoma metastatic                          | Extraskelletal osteosarcomas                               | Soft tissue neoplasms malignant and unspecified         | Neoplasms benign, malignant and unspecified (incl cysts and polyps) |
| Extraskelletal osteosarcoma recurrent                           | Extraskelletal osteosarcomas                               | Soft tissue neoplasms malignant and unspecified         | Neoplasms benign, malignant and unspecified (incl cysts and polyps) |
| Fallopian tube cancer                                           | Fallopian tube neoplasms malignant                         | Reproductive neoplasms female malignant and unspecified | Neoplasms benign, malignant and unspecified (incl cysts and polyps) |
| Fallopian tube cancer metastatic                                | Fallopian tube neoplasms malignant                         | Reproductive neoplasms female malignant and unspecified | Neoplasms benign, malignant and unspecified (incl cysts and polyps) |
| Fallopian tube cancer stage I                                   | Fallopian tube neoplasms malignant                         | Reproductive neoplasms female malignant and unspecified | Neoplasms benign, malignant and unspecified (incl cysts and polyps) |
| Fallopian tube cancer stage II                                  | Fallopian tube neoplasms malignant                         | Reproductive neoplasms female malignant and unspecified | Neoplasms benign, malignant and unspecified (incl cysts and polyps) |
| Fallopian tube cancer stage III                                 | Fallopian tube neoplasms malignant                         | Reproductive neoplasms female malignant and unspecified | Neoplasms benign, malignant and unspecified (incl cysts and polyps) |
| Fallopian tube cancer stage IV                                  | Fallopian tube neoplasms malignant                         | Reproductive neoplasms female malignant and unspecified | Neoplasms benign, malignant and unspecified (incl cysts and polyps) |
| Fibrosarcoma                                                    | Fibrosarcomas malignant                                    | Soft tissue neoplasms malignant and unspecified         | Neoplasms benign, malignant and unspecified (incl cysts and polyps) |
| Fibrosarcoma metastatic                                         | Fibrosarcomas malignant                                    | Soft tissue neoplasms malignant and unspecified         | Neoplasms benign, malignant and unspecified (incl cysts and polyps) |
| Follicle centre lymphoma diffuse small cell lymphoma recurrent  | Follicle centre lymphomas diffuse predominantly small cell | Lymphomas non-Hodgkin's B-cell                          | Neoplasms benign, malignant and unspecified (incl cysts and polyps) |
| Follicle centre lymphoma diffuse small cell lymphoma refractory | Follicle centre lymphomas diffuse predominantly small cell | Lymphomas non-Hodgkin's B-cell                          | Neoplasms benign, malignant and unspecified (incl cysts and polyps) |
| Follicle centre lymphoma diffuse small cell lymphoma stage I    | Follicle centre lymphomas diffuse predominantly small cell | Lymphomas non-Hodgkin's B-cell                          | Neoplasms benign, malignant and unspecified (incl cysts and polyps) |
| Follicle centre lymphoma diffuse small cell lymphoma stage II   | Follicle centre lymphomas diffuse predominantly small cell | Lymphomas non-Hodgkin's B-cell                          | Neoplasms benign, malignant and unspecified (incl cysts and polyps) |



|                                                                  |                                                            |                                                        |                                                                     |
|------------------------------------------------------------------|------------------------------------------------------------|--------------------------------------------------------|---------------------------------------------------------------------|
| Follicle centre lymphoma diffuse small cell lymphoma stage III   | Follicle centre lymphomas diffuse predominantly small cell | Lymphomas non-Hodgkin's B-cell                         | Neoplasms benign, malignant and unspecified (incl cysts and polyps) |
| Follicle centre lymphoma diffuse small cell lymphoma stage IV    | Follicle centre lymphomas diffuse predominantly small cell | Lymphomas non-Hodgkin's B-cell                         | Neoplasms benign, malignant and unspecified (incl cysts and polyps) |
| Follicle centre lymphoma, follicular grade I, II, III recurrent  | Follicle centre lymphomas, follicular grade I, II, III     | Lymphomas non-Hodgkin's B-cell                         | Neoplasms benign, malignant and unspecified (incl cysts and polyps) |
| Follicle centre lymphoma, follicular grade I, II, III refractory | Follicle centre lymphomas, follicular grade I, II, III     | Lymphomas non-Hodgkin's B-cell                         | Neoplasms benign, malignant and unspecified (incl cysts and polyps) |
| Follicle centre lymphoma, follicular grade I, II, III stage I    | Follicle centre lymphomas, follicular grade I, II, III     | Lymphomas non-Hodgkin's B-cell                         | Neoplasms benign, malignant and unspecified (incl cysts and polyps) |
| Follicle centre lymphoma, follicular grade I, II, III stage II   | Follicle centre lymphomas, follicular grade I, II, III     | Lymphomas non-Hodgkin's B-cell                         | Neoplasms benign, malignant and unspecified (incl cysts and polyps) |
| Follicle centre lymphoma, follicular grade I, II, III stage III  | Follicle centre lymphomas, follicular grade I, II, III     | Lymphomas non-Hodgkin's B-cell                         | Neoplasms benign, malignant and unspecified (incl cysts and polyps) |
| Follicle centre lymphoma, follicular grade I, II, III stage IV   | Follicle centre lymphomas, follicular grade I, II, III     | Lymphomas non-Hodgkin's B-cell                         | Neoplasms benign, malignant and unspecified (incl cysts and polyps) |
| Follicular thyroid cancer                                        | Thyroid neoplasms malignant                                | Endocrine neoplasms malignant and unspecified          | Neoplasms benign, malignant and unspecified (incl cysts and polyps) |
| Gallbladder cancer                                               | Gallbladder neoplasms malignant                            | Hepatobiliary neoplasms malignant and unspecified      | Neoplasms benign, malignant and unspecified (incl cysts and polyps) |
| Gallbladder cancer recurrent                                     | Gallbladder neoplasms malignant                            | Hepatobiliary neoplasms malignant and unspecified      | Neoplasms benign, malignant and unspecified (incl cysts and polyps) |
| Ganglioglioma                                                    | Nervous system neoplasms unspecified malignancy NEC        | Nervous system neoplasms malignant and unspecified NEC | Neoplasms benign, malignant and unspecified (incl cysts and polyps) |
| Ganglioneuroblastoma                                             | Nervous system neoplasms malignant NEC                     | Nervous system neoplasms malignant and unspecified NEC | Neoplasms benign, malignant and unspecified (incl cysts and polyps) |
| Gastric cancer                                                   | Gastric neoplasms malignant                                | Gastrointestinal neoplasms malignant and unspecified   | Neoplasms benign, malignant and unspecified (incl cysts and polyps) |

|                                   |                                                     |                                                                        |                                                                     |
|-----------------------------------|-----------------------------------------------------|------------------------------------------------------------------------|---------------------------------------------------------------------|
| Gastric cancer recurrent          | Gastric neoplasms malignant                         | Gastrointestinal neoplasms malignant and unspecified                   | Neoplasms benign, malignant and unspecified (incl cysts and polyps) |
| Gastric cancer stage 0            | Gastric neoplasms malignant                         | Gastrointestinal neoplasms malignant and unspecified                   | Neoplasms benign, malignant and unspecified (incl cysts and polyps) |
| Gastric cancer stage I            | Gastric neoplasms malignant                         | Gastrointestinal neoplasms malignant and unspecified                   | Neoplasms benign, malignant and unspecified (incl cysts and polyps) |
| Gastric cancer stage II           | Gastric neoplasms malignant                         | Gastrointestinal neoplasms malignant and unspecified                   | Neoplasms benign, malignant and unspecified (incl cysts and polyps) |
| Gastric cancer stage III          | Gastric neoplasms malignant                         | Gastrointestinal neoplasms malignant and unspecified                   | Neoplasms benign, malignant and unspecified (incl cysts and polyps) |
| Gastrointestinal carcinoma        | Gastrointestinal neoplasms malignant NEC            | Gastrointestinal neoplasms malignant and unspecified                   | Neoplasms benign, malignant and unspecified (incl cysts and polyps) |
| Genital neoplasm malignant female | Female reproductive neoplasms malignant NEC         | Reproductive neoplasms female malignant and unspecified                | Neoplasms benign, malignant and unspecified (incl cysts and polyps) |
| Glioblastoma                      | Glial tumours malignant                             | Nervous system neoplasms malignant and unspecified NEC                 | Neoplasms benign, malignant and unspecified (incl cysts and polyps) |
| Glioblastoma multiforme           | Glial tumours malignant                             | Nervous system neoplasms malignant and unspecified NEC                 | Neoplasms benign, malignant and unspecified (incl cysts and polyps) |
| Glioma                            | Nervous system neoplasms unspecified malignancy NEC | Nervous system neoplasms malignant and unspecified NEC                 | Neoplasms benign, malignant and unspecified (incl cysts and polyps) |
| Gliosarcoma                       | Glial tumours malignant                             | Nervous system neoplasms malignant and unspecified NEC                 | Neoplasms benign, malignant and unspecified (incl cysts and polyps) |
| Glottis carcinoma                 | Laryngeal neoplasms malignant                       | Respiratory and mediastinal neoplasms malignant and unspecified        | Neoplasms benign, malignant and unspecified (incl cysts and polyps) |
| Glucagonoma                       | Islet cell neoplasms and APUDoma NEC                | Endocrine neoplasms malignant and unspecified                          | Neoplasms benign, malignant and unspecified (incl cysts and polyps) |
| Haemangiopericytoma               | Cardiovascular neoplasms malignant and unspecified  | Miscellaneous and site unspecified neoplasms malignant and unspecified | Neoplasms benign, malignant and unspecified (incl cysts and polyps) |

|                                                                 |                                                   |                                                        |                                                                     |
|-----------------------------------------------------------------|---------------------------------------------------|--------------------------------------------------------|---------------------------------------------------------------------|
| Haemangiopericytoma of meninges                                 | Meningiomas malignant                             | Nervous system neoplasms malignant and unspecified NEC | Neoplasms benign, malignant and unspecified (incl cysts and polyps) |
| Hairy cell leukaemia                                            | Leukaemias chronic lymphocytic                    | Leukaemias                                             | Neoplasms benign, malignant and unspecified (incl cysts and polyps) |
| Hepatoblastoma recurrent                                        | Hepatoblastomas                                   | Hepatobiliary neoplasms malignant and unspecified      | Neoplasms benign, malignant and unspecified (incl cysts and polyps) |
| High grade B-cell lymphoma Burkitt-like lymphoma                | High grade B-cell lymphomas Burkitt-like lymphoma | Lymphomas non-Hodgkin's B-cell                         | Neoplasms benign, malignant and unspecified (incl cysts and polyps) |
| High grade B-cell lymphoma Burkitt-like lymphoma recurrent      | High grade B-cell lymphomas Burkitt-like lymphoma | Lymphomas non-Hodgkin's B-cell                         | Neoplasms benign, malignant and unspecified (incl cysts and polyps) |
| High grade B-cell lymphoma Burkitt-like lymphoma refractory     | High grade B-cell lymphomas Burkitt-like lymphoma | Lymphomas non-Hodgkin's B-cell                         | Neoplasms benign, malignant and unspecified (incl cysts and polyps) |
| High grade B-cell lymphoma Burkitt-like lymphoma stage I        | High grade B-cell lymphomas Burkitt-like lymphoma | Lymphomas non-Hodgkin's B-cell                         | Neoplasms benign, malignant and unspecified (incl cysts and polyps) |
| High grade B-cell lymphoma Burkitt-like lymphoma stage II       | High grade B-cell lymphomas Burkitt-like lymphoma | Lymphomas non-Hodgkin's B-cell                         | Neoplasms benign, malignant and unspecified (incl cysts and polyps) |
| High grade B-cell lymphoma Burkitt-like lymphoma stage III      | High grade B-cell lymphomas Burkitt-like lymphoma | Lymphomas non-Hodgkin's B-cell                         | Neoplasms benign, malignant and unspecified (incl cysts and polyps) |
| High grade B-cell lymphoma Burkitt-like lymphoma stage IV       | High grade B-cell lymphomas Burkitt-like lymphoma | Lymphomas non-Hodgkin's B-cell                         | Neoplasms benign, malignant and unspecified (incl cysts and polyps) |
| Hodgkin's disease                                               | Hodgkin's disease NEC                             | Lymphomas Hodgkin's disease                            | Neoplasms benign, malignant and unspecified (incl cysts and polyps) |
| Hodgkin's disease lymphocyte depletion stage I site unspecified | Hodgkin's disease lymphocyte depletion type       | Lymphomas Hodgkin's disease                            | Neoplasms benign, malignant and unspecified (incl cysts and polyps) |
| Hodgkin's disease lymphocyte depletion stage I subdiaphragm     | Hodgkin's disease lymphocyte depletion type       | Lymphomas Hodgkin's disease                            | Neoplasms benign, malignant and unspecified (incl cysts and polyps) |
| Hodgkin's disease lymphocyte depletion stage I supradiaphragm   | Hodgkin's disease lymphocyte depletion type       | Lymphomas Hodgkin's disease                            | Neoplasms benign, malignant and unspecified (incl cysts and polyps) |

|                                                                   |                                                |                             |                                                                     |
|-------------------------------------------------------------------|------------------------------------------------|-----------------------------|---------------------------------------------------------------------|
| Hodgkin's disease lymphocyte depletion stage II site unspecified  | Hodgkin's disease lymphocyte depletion type    | Lymphomas Hodgkin's disease | Neoplasms benign, malignant and unspecified (incl cysts and polyps) |
| Hodgkin's disease lymphocyte depletion stage II subdiaphragm      | Hodgkin's disease lymphocyte depletion type    | Lymphomas Hodgkin's disease | Neoplasms benign, malignant and unspecified (incl cysts and polyps) |
| Hodgkin's disease lymphocyte depletion stage II supradiaphragm    | Hodgkin's disease lymphocyte depletion type    | Lymphomas Hodgkin's disease | Neoplasms benign, malignant and unspecified (incl cysts and polyps) |
| Hodgkin's disease lymphocyte depletion type recurrent             | Hodgkin's disease lymphocyte depletion type    | Lymphomas Hodgkin's disease | Neoplasms benign, malignant and unspecified (incl cysts and polyps) |
| Hodgkin's disease lymphocyte depletion type refractory            | Hodgkin's disease lymphocyte depletion type    | Lymphomas Hodgkin's disease | Neoplasms benign, malignant and unspecified (incl cysts and polyps) |
| Hodgkin's disease lymphocyte depletion type stage III             | Hodgkin's disease lymphocyte depletion type    | Lymphomas Hodgkin's disease | Neoplasms benign, malignant and unspecified (incl cysts and polyps) |
| Hodgkin's disease lymphocyte depletion type stage IV              | Hodgkin's disease lymphocyte depletion type    | Lymphomas Hodgkin's disease | Neoplasms benign, malignant and unspecified (incl cysts and polyps) |
| Hodgkin's disease lymphocyte depletion type stage unspecified     | Hodgkin's disease lymphocyte depletion type    | Lymphomas Hodgkin's disease | Neoplasms benign, malignant and unspecified (incl cysts and polyps) |
| Hodgkin's disease lymphocyte predominance stage I site unspec     | Hodgkin's disease lymphocyte predominance type | Lymphomas Hodgkin's disease | Neoplasms benign, malignant and unspecified (incl cysts and polyps) |
| Hodgkin's disease lymphocyte predominance stage I subdiaphragm    | Hodgkin's disease lymphocyte predominance type | Lymphomas Hodgkin's disease | Neoplasms benign, malignant and unspecified (incl cysts and polyps) |
| Hodgkin's disease lymphocyte predominance stage I supradiaphragm  | Hodgkin's disease lymphocyte predominance type | Lymphomas Hodgkin's disease | Neoplasms benign, malignant and unspecified (incl cysts and polyps) |
| Hodgkin's disease lymphocyte predominance stage II site unspec    | Hodgkin's disease lymphocyte predominance type | Lymphomas Hodgkin's disease | Neoplasms benign, malignant and unspecified (incl cysts and polyps) |
| Hodgkin's disease lymphocyte predominance stage II subdiaphragm   | Hodgkin's disease lymphocyte predominance type | Lymphomas Hodgkin's disease | Neoplasms benign, malignant and unspecified (incl cysts and polyps) |
| Hodgkin's disease lymphocyte predominance stage II supradiaphragm | Hodgkin's disease lymphocyte predominance type | Lymphomas Hodgkin's disease | Neoplasms benign, malignant and unspecified (incl cysts and polyps) |

|                                                                  |                                                |                             |                                                                     |
|------------------------------------------------------------------|------------------------------------------------|-----------------------------|---------------------------------------------------------------------|
| Hodgkin's disease lymphocyte predominance type recurrent         | Hodgkin's disease lymphocyte predominance type | Lymphomas Hodgkin's disease | Neoplasms benign, malignant and unspecified (incl cysts and polyps) |
| Hodgkin's disease lymphocyte predominance type refractory        | Hodgkin's disease lymphocyte predominance type | Lymphomas Hodgkin's disease | Neoplasms benign, malignant and unspecified (incl cysts and polyps) |
| Hodgkin's disease lymphocyte predominance type stage III         | Hodgkin's disease lymphocyte predominance type | Lymphomas Hodgkin's disease | Neoplasms benign, malignant and unspecified (incl cysts and polyps) |
| Hodgkin's disease lymphocyte predominance type stage IV          | Hodgkin's disease lymphocyte predominance type | Lymphomas Hodgkin's disease | Neoplasms benign, malignant and unspecified (incl cysts and polyps) |
| Hodgkin's disease lymphocyte predominance type stage unspecified | Hodgkin's disease lymphocyte predominance type | Lymphomas Hodgkin's disease | Neoplasms benign, malignant and unspecified (incl cysts and polyps) |
| Hodgkin's disease mixed cellularity recurrent                    | Hodgkin's disease mixed cellularity type       | Lymphomas Hodgkin's disease | Neoplasms benign, malignant and unspecified (incl cysts and polyps) |
| Hodgkin's disease mixed cellularity refractory                   | Hodgkin's disease mixed cellularity type       | Lymphomas Hodgkin's disease | Neoplasms benign, malignant and unspecified (incl cysts and polyps) |
| Hodgkin's disease mixed cellularity stage I site unspecified     | Hodgkin's disease mixed cellularity type       | Lymphomas Hodgkin's disease | Neoplasms benign, malignant and unspecified (incl cysts and polyps) |
| Hodgkin's disease mixed cellularity stage I subdiaphragmatic     | Hodgkin's disease mixed cellularity type       | Lymphomas Hodgkin's disease | Neoplasms benign, malignant and unspecified (incl cysts and polyps) |
| Hodgkin's disease mixed cellularity stage I supradiaphragmatic   | Hodgkin's disease mixed cellularity type       | Lymphomas Hodgkin's disease | Neoplasms benign, malignant and unspecified (incl cysts and polyps) |
| Hodgkin's disease mixed cellularity stage II subdiaphragmatic    | Hodgkin's disease mixed cellularity type       | Lymphomas Hodgkin's disease | Neoplasms benign, malignant and unspecified (incl cysts and polyps) |
| Hodgkin's disease mixed cellularity stage II supradiaphragmatic  | Hodgkin's disease mixed cellularity type       | Lymphomas Hodgkin's disease | Neoplasms benign, malignant and unspecified (incl cysts and polyps) |
| Hodgkin's disease mixed cellularity stage III                    | Hodgkin's disease mixed cellularity type       | Lymphomas Hodgkin's disease | Neoplasms benign, malignant and unspecified (incl cysts and polyps) |
| Hodgkin's disease mixed cellularity stage IV                     | Hodgkin's disease mixed cellularity type       | Lymphomas Hodgkin's disease | Neoplasms benign, malignant and unspecified (incl cysts and polyps) |

|                                                       |                                                    |                                                                 |                                                                     |
|-------------------------------------------------------|----------------------------------------------------|-----------------------------------------------------------------|---------------------------------------------------------------------|
| Hodgkin's disease mixed cellularity stage unspecified | Hodgkin's disease mixed cellularity type           | Lymphomas Hodgkin's disease                                     | Neoplasms benign, malignant and unspecified (incl cysts and polyps) |
| Hodgkin's disease nodular sclerosis                   | Hodgkin's disease nodular sclerosis type           | Lymphomas Hodgkin's disease                                     | Neoplasms benign, malignant and unspecified (incl cysts and polyps) |
| Hodgkin's disease nodular sclerosis recurrent         | Hodgkin's disease nodular sclerosis type           | Lymphomas Hodgkin's disease                                     | Neoplasms benign, malignant and unspecified (incl cysts and polyps) |
| Hodgkin's disease nodular sclerosis refractory        | Hodgkin's disease nodular sclerosis type           | Lymphomas Hodgkin's disease                                     | Neoplasms benign, malignant and unspecified (incl cysts and polyps) |
| Hodgkin's disease nodular sclerosis stage III         | Hodgkin's disease nodular sclerosis type           | Lymphomas Hodgkin's disease                                     | Neoplasms benign, malignant and unspecified (incl cysts and polyps) |
| Hodgkin's disease nodular sclerosis stage IV          | Hodgkin's disease nodular sclerosis type           | Lymphomas Hodgkin's disease                                     | Neoplasms benign, malignant and unspecified (incl cysts and polyps) |
| Hodgkin's disease recurrent                           | Hodgkin's disease NEC                              | Lymphomas Hodgkin's disease                                     | Neoplasms benign, malignant and unspecified (incl cysts and polyps) |
| Hodgkin's disease refractory                          | Hodgkin's disease NEC                              | Lymphomas Hodgkin's disease                                     | Neoplasms benign, malignant and unspecified (incl cysts and polyps) |
| Hodgkin's disease stage I                             | Hodgkin's disease NEC                              | Lymphomas Hodgkin's disease                                     | Neoplasms benign, malignant and unspecified (incl cysts and polyps) |
| Hodgkin's disease stage II                            | Hodgkin's disease NEC                              | Lymphomas Hodgkin's disease                                     | Neoplasms benign, malignant and unspecified (incl cysts and polyps) |
| Hodgkin's disease stage III                           | Hodgkin's disease NEC                              | Lymphomas Hodgkin's disease                                     | Neoplasms benign, malignant and unspecified (incl cysts and polyps) |
| Hodgkin's disease unclassifiable                      | Hodgkin's disease NEC                              | Lymphomas Hodgkin's disease                                     | Neoplasms benign, malignant and unspecified (incl cysts and polyps) |
| Hypopharyngeal cancer                                 | Hypopharyngeal neoplasms malignant and unspecified | Respiratory and mediastinal neoplasms malignant and unspecified | Neoplasms benign, malignant and unspecified (incl cysts and polyps) |
| Hypopharyngeal cancer recurrent                       | Hypopharyngeal neoplasms malignant and unspecified | Respiratory and mediastinal neoplasms malignant and unspecified | Neoplasms benign, malignant and unspecified (incl cysts and polyps) |

|                                            |                                                    |                                                                 |                                                                     |
|--------------------------------------------|----------------------------------------------------|-----------------------------------------------------------------|---------------------------------------------------------------------|
| Hypopharyngeal cancer stage 0              | Hypopharyngeal neoplasms malignant and unspecified | Respiratory and mediastinal neoplasms malignant and unspecified | Neoplasms benign, malignant and unspecified (incl cysts and polyps) |
| Hypopharyngeal cancer stage I              | Hypopharyngeal neoplasms malignant and unspecified | Respiratory and mediastinal neoplasms malignant and unspecified | Neoplasms benign, malignant and unspecified (incl cysts and polyps) |
| Hypopharyngeal cancer stage II             | Hypopharyngeal neoplasms malignant and unspecified | Respiratory and mediastinal neoplasms malignant and unspecified | Neoplasms benign, malignant and unspecified (incl cysts and polyps) |
| Hypopharyngeal cancer stage III            | Hypopharyngeal neoplasms malignant and unspecified | Respiratory and mediastinal neoplasms malignant and unspecified | Neoplasms benign, malignant and unspecified (incl cysts and polyps) |
| Hypopharyngeal cancer stage IV             | Hypopharyngeal neoplasms malignant and unspecified | Respiratory and mediastinal neoplasms malignant and unspecified | Neoplasms benign, malignant and unspecified (incl cysts and polyps) |
| Inflammatory carcinoma of breast recurrent | Breast and nipple neoplasms malignant              | Breast neoplasms malignant and unspecified (incl nipple)        | Neoplasms benign, malignant and unspecified (incl cysts and polyps) |
| Inflammatory carcinoma of breast stage III | Breast and nipple neoplasms malignant              | Breast neoplasms malignant and unspecified (incl nipple)        | Neoplasms benign, malignant and unspecified (incl cysts and polyps) |
| Inflammatory carcinoma of breast stage IV  | Breast and nipple neoplasms malignant              | Breast neoplasms malignant and unspecified (incl nipple)        | Neoplasms benign, malignant and unspecified (incl cysts and polyps) |
| Inflammatory carcinoma of the breast       | Breast and nipple neoplasms malignant              | Breast neoplasms malignant and unspecified (incl nipple)        | Neoplasms benign, malignant and unspecified (incl cysts and polyps) |
| Intestinal T-cell lymphoma recurrent       | Intestinal T-cell lymphomas                        | Lymphomas non-Hodgkin's T-cell                                  | Neoplasms benign, malignant and unspecified (incl cysts and polyps) |
| Intestinal T-cell lymphoma refractory      | Intestinal T-cell lymphomas                        | Lymphomas non-Hodgkin's T-cell                                  | Neoplasms benign, malignant and unspecified (incl cysts and polyps) |
| Intestinal T-cell lymphoma stage I         | Intestinal T-cell lymphomas                        | Lymphomas non-Hodgkin's T-cell                                  | Neoplasms benign, malignant and unspecified (incl cysts and polyps) |
| Intestinal T-cell lymphoma stage II        | Intestinal T-cell lymphomas                        | Lymphomas non-Hodgkin's T-cell                                  | Neoplasms benign, malignant and unspecified (incl cysts and polyps) |
| Intestinal T-cell lymphoma stage III       | Intestinal T-cell lymphomas                        | Lymphomas non-Hodgkin's T-cell                                  | Neoplasms benign, malignant and unspecified (incl cysts and polyps) |

|                                           |                                                                                 |                                                                 |                                                                     |
|-------------------------------------------|---------------------------------------------------------------------------------|-----------------------------------------------------------------|---------------------------------------------------------------------|
| Intestinal T-cell lymphoma stage IV       | Intestinal T-cell lymphomas                                                     | Lymphomas non-Hodgkin's T-cell                                  | Neoplasms benign, malignant and unspecified (incl cysts and polyps) |
| Intracranial meningioma malignant         | Meningiomas malignant                                                           | Nervous system neoplasms malignant and unspecified NEC          | Neoplasms benign, malignant and unspecified (incl cysts and polyps) |
| Juvenile chronic myelomonocytic leukaemia | Leukaemias chronic myeloid                                                      | Leukaemias                                                      | Neoplasms benign, malignant and unspecified (incl cysts and polyps) |
| Kaposi's sarcoma                          | Kaposi's sarcomas                                                               | Soft tissue neoplasms malignant and unspecified                 | Neoplasms benign, malignant and unspecified (incl cysts and polyps) |
| Kaposi's sarcoma AIDS related             | Kaposi's sarcomas                                                               | Soft tissue neoplasms malignant and unspecified                 | Neoplasms benign, malignant and unspecified (incl cysts and polyps) |
| Kaposi's sarcoma classical type           | Kaposi's sarcomas                                                               | Soft tissue neoplasms malignant and unspecified                 | Neoplasms benign, malignant and unspecified (incl cysts and polyps) |
| Keratoacanthoma                           | Skin neoplasms malignant and unspecified (excl melanoma)                        | Skin neoplasms malignant and unspecified                        | Neoplasms benign, malignant and unspecified (incl cysts and polyps) |
| Large cell lung cancer                    | Non-small cell neoplasms malignant of the respiratory tract cell type specified | Respiratory and mediastinal neoplasms malignant and unspecified | Neoplasms benign, malignant and unspecified (incl cysts and polyps) |
| Large cell lung cancer recurrent          | Non-small cell neoplasms malignant of the respiratory tract cell type specified | Respiratory and mediastinal neoplasms malignant and unspecified | Neoplasms benign, malignant and unspecified (incl cysts and polyps) |
| Large cell lung cancer stage 0            | Non-small cell neoplasms malignant of the respiratory tract cell type specified | Respiratory and mediastinal neoplasms malignant and unspecified | Neoplasms benign, malignant and unspecified (incl cysts and polyps) |
| Large cell lung cancer stage I            | Non-small cell neoplasms malignant of the respiratory tract cell type specified | Respiratory and mediastinal neoplasms malignant and unspecified | Neoplasms benign, malignant and unspecified (incl cysts and polyps) |
| Large cell lung cancer stage II           | Non-small cell neoplasms malignant of the respiratory tract cell type specified | Respiratory and mediastinal neoplasms malignant and unspecified | Neoplasms benign, malignant and unspecified (incl cysts and polyps) |
| Large cell lung cancer stage III          | Non-small cell neoplasms malignant of the respiratory tract cell type specified | Respiratory and mediastinal neoplasms malignant and unspecified | Neoplasms benign, malignant and unspecified (incl cysts and polyps) |
| Large cell lung cancer stage IV           | Non-small cell neoplasms malignant of the respiratory tract cell type specified | Respiratory and mediastinal neoplasms malignant and unspecified | Neoplasms benign, malignant and unspecified (incl cysts and polyps) |



|                                   |                               |                                                                 |                                                                     |
|-----------------------------------|-------------------------------|-----------------------------------------------------------------|---------------------------------------------------------------------|
| Laryngeal cancer                  | Laryngeal neoplasms malignant | Respiratory and mediastinal neoplasms malignant and unspecified | Neoplasms benign, malignant and unspecified (incl cysts and polyps) |
| Laryngeal cancer recurrent        | Laryngeal neoplasms malignant | Respiratory and mediastinal neoplasms malignant and unspecified | Neoplasms benign, malignant and unspecified (incl cysts and polyps) |
| Laryngeal cancer stage 0          | Laryngeal neoplasms malignant | Respiratory and mediastinal neoplasms malignant and unspecified | Neoplasms benign, malignant and unspecified (incl cysts and polyps) |
| Laryngeal cancer stage I          | Laryngeal neoplasms malignant | Respiratory and mediastinal neoplasms malignant and unspecified | Neoplasms benign, malignant and unspecified (incl cysts and polyps) |
| Laryngeal cancer stage II         | Laryngeal neoplasms malignant | Respiratory and mediastinal neoplasms malignant and unspecified | Neoplasms benign, malignant and unspecified (incl cysts and polyps) |
| Laryngeal cancer stage III        | Laryngeal neoplasms malignant | Respiratory and mediastinal neoplasms malignant and unspecified | Neoplasms benign, malignant and unspecified (incl cysts and polyps) |
| Laryngeal cancer stage IV         | Laryngeal neoplasms malignant | Respiratory and mediastinal neoplasms malignant and unspecified | Neoplasms benign, malignant and unspecified (incl cysts and polyps) |
| Laryngeal squamous cell carcinoma | Laryngeal neoplasms malignant | Respiratory and mediastinal neoplasms malignant and unspecified | Neoplasms benign, malignant and unspecified (incl cysts and polyps) |
| Leiomyosarcoma                    | Leiomyosarcomas               | Soft tissue neoplasms malignant and unspecified                 | Neoplasms benign, malignant and unspecified (incl cysts and polyps) |
| Leiomyosarcoma metastatic         | Leiomyosarcomas               | Soft tissue neoplasms malignant and unspecified                 | Neoplasms benign, malignant and unspecified (incl cysts and polyps) |
| Leiomyosarcoma recurrent          | Leiomyosarcomas               | Soft tissue neoplasms malignant and unspecified                 | Neoplasms benign, malignant and unspecified (incl cysts and polyps) |
| Lentigo maligna                   | Skin melanomas (excl ocular)  | Skin neoplasms malignant and unspecified                        | Neoplasms benign, malignant and unspecified (incl cysts and polyps) |
| Lentigo maligna recurrent         | Skin melanomas (excl ocular)  | Skin neoplasms malignant and unspecified                        | Neoplasms benign, malignant and unspecified (incl cysts and polyps) |
| Lentigo maligna stage I           | Skin melanomas (excl ocular)  | Skin neoplasms malignant and unspecified                        | Neoplasms benign, malignant and unspecified (incl cysts and polyps) |

|                                         |                                                    |                                                       |                                                                     |
|-----------------------------------------|----------------------------------------------------|-------------------------------------------------------|---------------------------------------------------------------------|
| Lentigo maligna stage II                | Skin melanomas (excl ocular)                       | Skin neoplasms malignant and unspecified              | Neoplasms benign, malignant and unspecified (incl cysts and polyps) |
| Lentigo maligna stage III               | Skin melanomas (excl ocular)                       | Skin neoplasms malignant and unspecified              | Neoplasms benign, malignant and unspecified (incl cysts and polyps) |
| Lentigo maligna stage IV                | Skin melanomas (excl ocular)                       | Skin neoplasms malignant and unspecified              | Neoplasms benign, malignant and unspecified (incl cysts and polyps) |
| Leukaemia                               | Leukaemias NEC                                     | Leukaemias                                            | Neoplasms benign, malignant and unspecified (incl cysts and polyps) |
| Leukaemia basophilic                    | Leukaemias myeloid NEC                             | Leukaemias                                            | Neoplasms benign, malignant and unspecified (incl cysts and polyps) |
| Leukaemia granulocytic                  | Leukaemias myeloid NEC                             | Leukaemias                                            | Neoplasms benign, malignant and unspecified (incl cysts and polyps) |
| Leukaemia monocytic                     | Leukaemias myeloid NEC                             | Leukaemias                                            | Neoplasms benign, malignant and unspecified (incl cysts and polyps) |
| Leukaemic lymphoma                      | Non-Hodgkin's lymphomas NEC                        | Lymphomas non-Hodgkin's unspecified histology         | Neoplasms benign, malignant and unspecified (incl cysts and polyps) |
| Leydig cell tumour of the testis        | Reproductive neoplasms male unspecified malignancy | Reproductive neoplasms male malignant and unspecified | Neoplasms benign, malignant and unspecified (incl cysts and polyps) |
| Linitis plastica                        | Gastric neoplasms malignant                        | Gastrointestinal neoplasms malignant and unspecified  | Neoplasms benign, malignant and unspecified (incl cysts and polyps) |
| Lip and/or oral cavity cancer recurrent | Lip and oral cavity neoplasms malignant            | Gastrointestinal neoplasms malignant and unspecified  | Neoplasms benign, malignant and unspecified (incl cysts and polyps) |
| Lip and/or oral cavity cancer stage 0   | Lip and oral cavity neoplasms malignant            | Gastrointestinal neoplasms malignant and unspecified  | Neoplasms benign, malignant and unspecified (incl cysts and polyps) |
| Lip and/or oral cavity cancer stage I   | Lip and oral cavity neoplasms malignant            | Gastrointestinal neoplasms malignant and unspecified  | Neoplasms benign, malignant and unspecified (incl cysts and polyps) |
| Lip and/or oral cavity cancer stage II  | Lip and oral cavity neoplasms malignant            | Gastrointestinal neoplasms malignant and unspecified  | Neoplasms benign, malignant and unspecified (incl cysts and polyps) |

|                                                |                                                                                 |                                                                 |                                                                     |
|------------------------------------------------|---------------------------------------------------------------------------------|-----------------------------------------------------------------|---------------------------------------------------------------------|
| Lip and/or oral cavity cancer stage III        | Lip and oral cavity neoplasms malignant                                         | Gastrointestinal neoplasms malignant and unspecified            | Neoplasms benign, malignant and unspecified (incl cysts and polyps) |
| Lip and/or oral cavity cancer stage IV         | Lip and oral cavity neoplasms malignant                                         | Gastrointestinal neoplasms malignant and unspecified            | Neoplasms benign, malignant and unspecified (incl cysts and polyps) |
| Lip neoplasm malignant stage unspecified       | Lip and oral cavity neoplasms malignant                                         | Gastrointestinal neoplasms malignant and unspecified            | Neoplasms benign, malignant and unspecified (incl cysts and polyps) |
| Liposarcoma                                    | Liposarcomas malignant                                                          | Soft tissue neoplasms malignant and unspecified                 | Neoplasms benign, malignant and unspecified (incl cysts and polyps) |
| Liposarcoma metastatic                         | Liposarcomas malignant                                                          | Soft tissue neoplasms malignant and unspecified                 | Neoplasms benign, malignant and unspecified (incl cysts and polyps) |
| Liposarcoma recurrent                          | Liposarcomas malignant                                                          | Soft tissue neoplasms malignant and unspecified                 | Neoplasms benign, malignant and unspecified (incl cysts and polyps) |
| Lung adenocarcinoma                            | Non-small cell neoplasms malignant of the respiratory tract cell type specified | Respiratory and mediastinal neoplasms malignant and unspecified | Neoplasms benign, malignant and unspecified (incl cysts and polyps) |
| Lung adenocarcinoma recurrent                  | Non-small cell neoplasms malignant of the respiratory tract cell type specified | Respiratory and mediastinal neoplasms malignant and unspecified | Neoplasms benign, malignant and unspecified (incl cysts and polyps) |
| Lung adenocarcinoma stage 0                    | Non-small cell neoplasms malignant of the respiratory tract cell type specified | Respiratory and mediastinal neoplasms malignant and unspecified | Neoplasms benign, malignant and unspecified (incl cysts and polyps) |
| Lung adenocarcinoma stage I                    | Non-small cell neoplasms malignant of the respiratory tract cell type specified | Respiratory and mediastinal neoplasms malignant and unspecified | Neoplasms benign, malignant and unspecified (incl cysts and polyps) |
| Lung adenocarcinoma stage II                   | Non-small cell neoplasms malignant of the respiratory tract cell type specified | Respiratory and mediastinal neoplasms malignant and unspecified | Neoplasms benign, malignant and unspecified (incl cysts and polyps) |
| Lung adenocarcinoma stage III                  | Non-small cell neoplasms malignant of the respiratory tract cell type specified | Respiratory and mediastinal neoplasms malignant and unspecified | Neoplasms benign, malignant and unspecified (incl cysts and polyps) |
| Lung adenocarcinoma stage IV                   | Non-small cell neoplasms malignant of the respiratory tract cell type specified | Respiratory and mediastinal neoplasms malignant and unspecified | Neoplasms benign, malignant and unspecified (incl cysts and polyps) |
| Lung carcinoma cell type unspecified recurrent | Respiratory tract and pleural neoplasms malignant cell type unspecified NEC     | Respiratory and mediastinal neoplasms malignant and unspecified | Neoplasms benign, malignant and unspecified (incl cysts and polyps) |

|                                                |                                                                                 |                                                                 |                                                                     |
|------------------------------------------------|---------------------------------------------------------------------------------|-----------------------------------------------------------------|---------------------------------------------------------------------|
| Lung carcinoma cell type unspecified stage 0   | Respiratory tract and pleural neoplasms malignant cell type unspecified NEC     | Respiratory and mediastinal neoplasms malignant and unspecified | Neoplasms benign, malignant and unspecified (incl cysts and polyps) |
| Lung carcinoma cell type unspecified stage I   | Respiratory tract and pleural neoplasms malignant cell type unspecified NEC     | Respiratory and mediastinal neoplasms malignant and unspecified | Neoplasms benign, malignant and unspecified (incl cysts and polyps) |
| Lung carcinoma cell type unspecified stage II  | Respiratory tract and pleural neoplasms malignant cell type unspecified NEC     | Respiratory and mediastinal neoplasms malignant and unspecified | Neoplasms benign, malignant and unspecified (incl cysts and polyps) |
| Lung carcinoma cell type unspecified stage III | Respiratory tract and pleural neoplasms malignant cell type unspecified NEC     | Respiratory and mediastinal neoplasms malignant and unspecified | Neoplasms benign, malignant and unspecified (incl cysts and polyps) |
| Lung carcinoma cell type unspecified stage IV  | Respiratory tract and pleural neoplasms malignant cell type unspecified NEC     | Respiratory and mediastinal neoplasms malignant and unspecified | Neoplasms benign, malignant and unspecified (incl cysts and polyps) |
| Lung squamous cell carcinoma recurrent         | Non-small cell neoplasms malignant of the respiratory tract cell type specified | Respiratory and mediastinal neoplasms malignant and unspecified | Neoplasms benign, malignant and unspecified (incl cysts and polyps) |
| Lung squamous cell carcinoma stage 0           | Non-small cell neoplasms malignant of the respiratory tract cell type specified | Respiratory and mediastinal neoplasms malignant and unspecified | Neoplasms benign, malignant and unspecified (incl cysts and polyps) |
| Lung squamous cell carcinoma stage I           | Non-small cell neoplasms malignant of the respiratory tract cell type specified | Respiratory and mediastinal neoplasms malignant and unspecified | Neoplasms benign, malignant and unspecified (incl cysts and polyps) |
| Lung squamous cell carcinoma stage II          | Non-small cell neoplasms malignant of the respiratory tract cell type specified | Respiratory and mediastinal neoplasms malignant and unspecified | Neoplasms benign, malignant and unspecified (incl cysts and polyps) |
| Lung squamous cell carcinoma stage III         | Non-small cell neoplasms malignant of the respiratory tract cell type specified | Respiratory and mediastinal neoplasms malignant and unspecified | Neoplasms benign, malignant and unspecified (incl cysts and polyps) |
| Lung squamous cell carcinoma stage IV          | Non-small cell neoplasms malignant of the respiratory tract cell type specified | Respiratory and mediastinal neoplasms malignant and unspecified | Neoplasms benign, malignant and unspecified (incl cysts and polyps) |
| Lymphangiosarcoma                              | Lymphangiosarcomas                                                              | Soft tissue neoplasms malignant and unspecified                 | Neoplasms benign, malignant and unspecified (incl cysts and polyps) |
| Lymphocytic leukaemia                          | Leukaemias lymphocytic NEC                                                      | Leukaemias                                                      | Neoplasms benign, malignant and unspecified (incl cysts and polyps) |
| Lymphoid leukaemia (in remission)              | Leukaemias lymphocytic NEC                                                      | Leukaemias                                                      | Neoplasms benign, malignant and unspecified (incl cysts and polyps) |

|                                                     |                                                    |                                                                        |                                                                     |
|-----------------------------------------------------|----------------------------------------------------|------------------------------------------------------------------------|---------------------------------------------------------------------|
| Lymphoma                                            | Lymphomas unspecified NEC                          | Lymphomas NEC                                                          | Neoplasms benign, malignant and unspecified (incl cysts and polyps) |
| Lymphoma AIDS related                               | Lymphomas unspecified NEC                          | Lymphomas NEC                                                          | Neoplasms benign, malignant and unspecified (incl cysts and polyps) |
| Lymphoplasmacytoid lymphoma/immunocytoma            | Lymphoplasmacytoid lymphomas/immunocytomas         | Lymphomas non-Hodgkin's B-cell                                         | Neoplasms benign, malignant and unspecified (incl cysts and polyps) |
| Lymphoplasmacytoid lymphoma/immunocytoma recurrent  | Lymphoplasmacytoid lymphomas/immunocytomas         | Lymphomas non-Hodgkin's B-cell                                         | Neoplasms benign, malignant and unspecified (incl cysts and polyps) |
| Lymphoplasmacytoid lymphoma/immunocytoma refractory | Lymphoplasmacytoid lymphomas/immunocytomas         | Lymphomas non-Hodgkin's B-cell                                         | Neoplasms benign, malignant and unspecified (incl cysts and polyps) |
| Lymphoplasmacytoid lymphoma/immunocytoma stage I    | Lymphoplasmacytoid lymphomas/immunocytomas         | Lymphomas non-Hodgkin's B-cell                                         | Neoplasms benign, malignant and unspecified (incl cysts and polyps) |
| Lymphoplasmacytoid lymphoma/immunocytoma stage II   | Lymphoplasmacytoid lymphomas/immunocytomas         | Lymphomas non-Hodgkin's B-cell                                         | Neoplasms benign, malignant and unspecified (incl cysts and polyps) |
| Lymphoplasmacytoid lymphoma/immunocytoma stage III  | Lymphoplasmacytoid lymphomas/immunocytomas         | Lymphomas non-Hodgkin's B-cell                                         | Neoplasms benign, malignant and unspecified (incl cysts and polyps) |
| Lymphoplasmacytoid lymphoma/immunocytoma stage IV   | Lymphoplasmacytoid lymphomas/immunocytomas         | Lymphomas non-Hodgkin's B-cell                                         | Neoplasms benign, malignant and unspecified (incl cysts and polyps) |
| Malignant fibrous histiocytoma                      | Fibrous histiocytomas malignant                    | Soft tissue neoplasms malignant and unspecified                        | Neoplasms benign, malignant and unspecified (incl cysts and polyps) |
| Malignant fibrous histiocytoma metastatic           | Fibrous histiocytomas malignant                    | Soft tissue neoplasms malignant and unspecified                        | Neoplasms benign, malignant and unspecified (incl cysts and polyps) |
| Malignant fibrous histiocytoma of bone              | Bone sarcomas                                      | Skeletal neoplasms malignant and unspecified                           | Neoplasms benign, malignant and unspecified (incl cysts and polyps) |
| Malignant fibrous histiocytoma recurrent            | Fibrous histiocytomas malignant                    | Soft tissue neoplasms malignant and unspecified                        | Neoplasms benign, malignant and unspecified (incl cysts and polyps) |
| Malignant haemangiopericytoma                       | Cardiovascular neoplasms malignant and unspecified | Miscellaneous and site unspecified neoplasms malignant and unspecified | Neoplasms benign, malignant and unspecified (incl cysts and polyps) |

|                                              |                                                    |                                                                        |                                                                     |
|----------------------------------------------|----------------------------------------------------|------------------------------------------------------------------------|---------------------------------------------------------------------|
| Malignant haemangiopericytoma metastatic     | Cardiovascular neoplasms malignant and unspecified | Miscellaneous and site unspecified neoplasms malignant and unspecified | Neoplasms benign, malignant and unspecified (incl cysts and polyps) |
| Malignant haemangiopericytoma recurrent      | Cardiovascular neoplasms malignant and unspecified | Miscellaneous and site unspecified neoplasms malignant and unspecified | Neoplasms benign, malignant and unspecified (incl cysts and polyps) |
| Malignant histiocytosis                      | Histiocytoses                                      | Haematopoietic neoplasms (excl leukaemias and lymphomas)               | Neoplasms benign, malignant and unspecified (incl cysts and polyps) |
| Malignant hydatidiform mole                  | Extragenital primary germ cell neoplasms           | Miscellaneous and site unspecified neoplasms malignant and unspecified | Neoplasms benign, malignant and unspecified (incl cysts and polyps) |
| Malignant lymphoma unclassifiable high grade | Lymphomas unclassifiable malignant                 | Lymphomas NEC                                                          | Neoplasms benign, malignant and unspecified (incl cysts and polyps) |
| Malignant lymphoma unclassifiable low grade  | Lymphomas unclassifiable malignant                 | Lymphomas NEC                                                          | Neoplasms benign, malignant and unspecified (incl cysts and polyps) |
| Malignant mast cell neoplasm                 | Haematologic neoplasms NEC                         | Haematopoietic neoplasms (excl leukaemias and lymphomas)               | Neoplasms benign, malignant and unspecified (incl cysts and polyps) |
| Malignant melanoma                           | Skin melanomas (excl ocular)                       | Skin neoplasms malignant and unspecified                               | Neoplasms benign, malignant and unspecified (incl cysts and polyps) |
| Malignant melanoma in situ                   | Skin melanomas (excl ocular)                       | Skin neoplasms malignant and unspecified                               | Neoplasms benign, malignant and unspecified (incl cysts and polyps) |
| Malignant melanoma of sites other than skin  | Neoplasms malignant site unspecified NEC           | Miscellaneous and site unspecified neoplasms malignant and unspecified | Neoplasms benign, malignant and unspecified (incl cysts and polyps) |
| Malignant melanoma stage I                   | Skin melanomas (excl ocular)                       | Skin neoplasms malignant and unspecified                               | Neoplasms benign, malignant and unspecified (incl cysts and polyps) |
| Malignant melanoma stage II                  | Skin melanomas (excl ocular)                       | Skin neoplasms malignant and unspecified                               | Neoplasms benign, malignant and unspecified (incl cysts and polyps) |
| Malignant melanoma stage III                 | Skin melanomas (excl ocular)                       | Skin neoplasms malignant and unspecified                               | Neoplasms benign, malignant and unspecified (incl cysts and polyps) |
| Malignant melanoma stage IV                  | Skin melanomas (excl ocular)                       | Skin neoplasms malignant and unspecified                               | Neoplasms benign, malignant and unspecified (incl cysts and polyps) |

|                                            |                                                                             |                                                                 |                                                                     |
|--------------------------------------------|-----------------------------------------------------------------------------|-----------------------------------------------------------------|---------------------------------------------------------------------|
| Malignant mesenchymoma metastatic          | Mesenchymomas malignant                                                     | Soft tissue neoplasms malignant and unspecified                 | Neoplasms benign, malignant and unspecified (incl cysts and polyps) |
| Malignant mesenchymoma recurrent           | Mesenchymomas malignant                                                     | Soft tissue neoplasms malignant and unspecified                 | Neoplasms benign, malignant and unspecified (incl cysts and polyps) |
| Malignant neoplasm of ampulla of Vater     | Hepatobiliary neoplasms malignant NEC                                       | Hepatobiliary neoplasms malignant and unspecified               | Neoplasms benign, malignant and unspecified (incl cysts and polyps) |
| Malignant neoplasm of choroid              | Ocular neoplasms malignant (excl melanomas)                                 | Ocular neoplasms                                                | Neoplasms benign, malignant and unspecified (incl cysts and polyps) |
| Malignant neoplasm of conjunctiva          | Ocular neoplasms malignant (excl melanomas)                                 | Ocular neoplasms                                                | Neoplasms benign, malignant and unspecified (incl cysts and polyps) |
| Malignant neoplasm of cornea               | Ocular neoplasms malignant (excl melanomas)                                 | Ocular neoplasms                                                | Neoplasms benign, malignant and unspecified (incl cysts and polyps) |
| Malignant neoplasm of eye                  | Ocular neoplasms malignant (excl melanomas)                                 | Ocular neoplasms                                                | Neoplasms benign, malignant and unspecified (incl cysts and polyps) |
| Malignant neoplasm of islets of Langerhans | Islet cell neoplasms and APUDoma NEC                                        | Endocrine neoplasms malignant and unspecified                   | Neoplasms benign, malignant and unspecified (incl cysts and polyps) |
| Malignant neoplasm of lacrimal duct        | Ocular neoplasms malignant (excl melanomas)                                 | Ocular neoplasms                                                | Neoplasms benign, malignant and unspecified (incl cysts and polyps) |
| Malignant neoplasm of lacrimal gland       | Ocular neoplasms malignant (excl melanomas)                                 | Ocular neoplasms                                                | Neoplasms benign, malignant and unspecified (incl cysts and polyps) |
| Malignant neoplasm of orbit                | Ocular neoplasms malignant (excl melanomas)                                 | Ocular neoplasms                                                | Neoplasms benign, malignant and unspecified (incl cysts and polyps) |
| Malignant neoplasm of paraurethral glands  | Urinary tract neoplasms malignant NEC                                       | Renal and urinary tract neoplasms malignant and unspecified     | Neoplasms benign, malignant and unspecified (incl cysts and polyps) |
| Malignant neoplasm of placenta             | Female reproductive neoplasms malignant NEC                                 | Reproductive neoplasms female malignant and unspecified         | Neoplasms benign, malignant and unspecified (incl cysts and polyps) |
| Malignant neoplasm of pleura               | Respiratory tract and pleural neoplasms malignant cell type unspecified NEC | Respiratory and mediastinal neoplasms malignant and unspecified | Neoplasms benign, malignant and unspecified (incl cysts and polyps) |

|                                      |                                                   |                                                                 |                                                                     |
|--------------------------------------|---------------------------------------------------|-----------------------------------------------------------------|---------------------------------------------------------------------|
| Malignant neoplasm of renal pelvis   | Renal pelvis and ureter neoplasms malignant       | Renal and urinary tract neoplasms malignant and unspecified     | Neoplasms benign, malignant and unspecified (incl cysts and polyps) |
| Malignant neoplasm of retina         | Ocular neoplasms malignant (excl melanomas)       | Ocular neoplasms                                                | Neoplasms benign, malignant and unspecified (incl cysts and polyps) |
| Malignant neoplasm of spermatic cord | Reproductive neoplasms male malignant NEC         | Reproductive neoplasms male malignant and unspecified           | Neoplasms benign, malignant and unspecified (incl cysts and polyps) |
| Malignant neoplasm of spinal cord    | Central nervous system neoplasms malignant NEC    | Nervous system neoplasms malignant and unspecified NEC          | Neoplasms benign, malignant and unspecified (incl cysts and polyps) |
| Malignant neoplasm of thorax         | Mediastinal neoplasms malignant                   | Respiratory and mediastinal neoplasms malignant and unspecified | Neoplasms benign, malignant and unspecified (incl cysts and polyps) |
| Malignant neoplasm of uterine adnexa | Female reproductive neoplasms malignant NEC       | Reproductive neoplasms female malignant and unspecified         | Neoplasms benign, malignant and unspecified (incl cysts and polyps) |
| Malignant oligodendroglioma          | Glial tumours malignant                           | Nervous system neoplasms malignant and unspecified NEC          | Neoplasms benign, malignant and unspecified (incl cysts and polyps) |
| Malignant ovarian cyst               | Ovarian neoplasms malignant (excl germ cell)      | Reproductive neoplasms female malignant and unspecified         | Neoplasms benign, malignant and unspecified (incl cysts and polyps) |
| Malignant palate neoplasm            | Lip and oral cavity neoplasms malignant           | Gastrointestinal neoplasms malignant and unspecified            | Neoplasms benign, malignant and unspecified (incl cysts and polyps) |
| Malignant pituitary tumour           | Endocrine neoplasms malignant and unspecified NEC | Endocrine neoplasms malignant and unspecified                   | Neoplasms benign, malignant and unspecified (incl cysts and polyps) |
| Malignant splenic neoplasm           | Haematologic neoplasms NEC                        | Haematopoietic neoplasms (excl leukaemias and lymphomas)        | Neoplasms benign, malignant and unspecified (incl cysts and polyps) |
| Mantle cell lymphoma recurrent       | Mantle cell lymphomas                             | Lymphomas non-Hodgkin's B-cell                                  | Neoplasms benign, malignant and unspecified (incl cysts and polyps) |
| Mantle cell lymphoma refractory      | Mantle cell lymphomas                             | Lymphomas non-Hodgkin's B-cell                                  | Neoplasms benign, malignant and unspecified (incl cysts and polyps) |
| Mantle cell lymphoma stage I         | Mantle cell lymphomas                             | Lymphomas non-Hodgkin's B-cell                                  | Neoplasms benign, malignant and unspecified (incl cysts and polyps) |



|                                    |                                         |                                                          |                                                                     |
|------------------------------------|-----------------------------------------|----------------------------------------------------------|---------------------------------------------------------------------|
| Mantle cell lymphoma stage II      | Mantle cell lymphomas                   | Lymphomas non-Hodgkin's B-cell                           | Neoplasms benign, malignant and unspecified (incl cysts and polyps) |
| Mantle cell lymphoma stage III     | Mantle cell lymphomas                   | Lymphomas non-Hodgkin's B-cell                           | Neoplasms benign, malignant and unspecified (incl cysts and polyps) |
| Mantle cell lymphoma stage IV      | Mantle cell lymphomas                   | Lymphomas non-Hodgkin's B-cell                           | Neoplasms benign, malignant and unspecified (incl cysts and polyps) |
| Mature B-cell type acute leukaemia | Leukaemias acute lymphocytic            | Leukaemias                                               | Neoplasms benign, malignant and unspecified (incl cysts and polyps) |
| Medullary carcinoma of breast      | Breast and nipple neoplasms malignant   | Breast neoplasms malignant and unspecified (incl nipple) | Neoplasms benign, malignant and unspecified (incl cysts and polyps) |
| Medullary thyroid cancer           | Thyroid neoplasms malignant             | Endocrine neoplasms malignant and unspecified            | Neoplasms benign, malignant and unspecified (incl cysts and polyps) |
| Medulloblastoma                    | Glial tumours malignant                 | Nervous system neoplasms malignant and unspecified NEC   | Neoplasms benign, malignant and unspecified (incl cysts and polyps) |
| Meningioma malignant               | Meningiomas malignant                   | Nervous system neoplasms malignant and unspecified NEC   | Neoplasms benign, malignant and unspecified (incl cysts and polyps) |
| Mesothelioma malignant             | Mesotheliomas malignant and unspecified | Mesotheliomas                                            | Neoplasms benign, malignant and unspecified (incl cysts and polyps) |
| Mesothelioma malignant recurrent   | Mesotheliomas malignant and unspecified | Mesotheliomas                                            | Neoplasms benign, malignant and unspecified (incl cysts and polyps) |
| Metastases to abdominal cavity     | Metastases to specified sites           | Metastases                                               | Neoplasms benign, malignant and unspecified (incl cysts and polyps) |
| Metastases to adrenals             | Metastases to specified sites           | Metastases                                               | Neoplasms benign, malignant and unspecified (incl cysts and polyps) |
| Metastases to bone                 | Metastases to specified sites           | Metastases                                               | Neoplasms benign, malignant and unspecified (incl cysts and polyps) |
| Metastases to breast               | Metastases to specified sites           | Metastases                                               | Neoplasms benign, malignant and unspecified (incl cysts and polyps) |

|                                         |                                       |                                                   |                                                                     |
|-----------------------------------------|---------------------------------------|---------------------------------------------------|---------------------------------------------------------------------|
| Metastases to kidney                    | Metastases to specified sites         | Metastases                                        | Neoplasms benign, malignant and unspecified (incl cysts and polyps) |
| Metastases to large intestine           | Metastases to specified sites         | Metastases                                        | Neoplasms benign, malignant and unspecified (incl cysts and polyps) |
| Metastases to liver                     | Metastases to specified sites         | Metastases                                        | Neoplasms benign, malignant and unspecified (incl cysts and polyps) |
| Metastases to lung                      | Metastases to specified sites         | Metastases                                        | Neoplasms benign, malignant and unspecified (incl cysts and polyps) |
| Metastases to lymph nodes               | Metastases to specified sites         | Metastases                                        | Neoplasms benign, malignant and unspecified (incl cysts and polyps) |
| Metastases to neck                      | Metastases to specified sites         | Metastases                                        | Neoplasms benign, malignant and unspecified (incl cysts and polyps) |
| Metastases to ovary                     | Metastases to specified sites         | Metastases                                        | Neoplasms benign, malignant and unspecified (incl cysts and polyps) |
| Metastases to pleura                    | Metastases to specified sites         | Metastases                                        | Neoplasms benign, malignant and unspecified (incl cysts and polyps) |
| Metastases to skin                      | Metastases to specified sites         | Metastases                                        | Neoplasms benign, malignant and unspecified (incl cysts and polyps) |
| Metastases to small intestine           | Metastases to specified sites         | Metastases                                        | Neoplasms benign, malignant and unspecified (incl cysts and polyps) |
| Metastases to spine                     | Metastases to specified sites         | Metastases                                        | Neoplasms benign, malignant and unspecified (incl cysts and polyps) |
| Metastases to the mediastinum           | Metastases to specified sites         | Metastases                                        | Neoplasms benign, malignant and unspecified (incl cysts and polyps) |
| Metastatic malignant melanoma           | Skin melanomas (excl ocular)          | Skin neoplasms malignant and unspecified          | Neoplasms benign, malignant and unspecified (incl cysts and polyps) |
| Mixed hepatocellular cholangiocarcinoma | Hepatobiliary neoplasms malignant NEC | Hepatobiliary neoplasms malignant and unspecified | Neoplasms benign, malignant and unspecified (incl cysts and polyps) |

|                                 |                                                                                 |                                                                 |                                                                     |
|---------------------------------|---------------------------------------------------------------------------------|-----------------------------------------------------------------|---------------------------------------------------------------------|
| Mucinous endometrial carcinoma  | Endometrial neoplasms malignant                                                 | Reproductive neoplasms female malignant and unspecified         | Neoplasms benign, malignant and unspecified (incl cysts and polyps) |
| Mycosis fungoides               | Mycoses fungoides                                                               | Lymphomas non-Hodgkin's T-cell                                  | Neoplasms benign, malignant and unspecified (incl cysts and polyps) |
| Mycosis fungoides recurrent     | Mycoses fungoides                                                               | Lymphomas non-Hodgkin's T-cell                                  | Neoplasms benign, malignant and unspecified (incl cysts and polyps) |
| Mycosis fungoides refractory    | Mycoses fungoides                                                               | Lymphomas non-Hodgkin's T-cell                                  | Neoplasms benign, malignant and unspecified (incl cysts and polyps) |
| Mycosis fungoides stage I       | Mycoses fungoides                                                               | Lymphomas non-Hodgkin's T-cell                                  | Neoplasms benign, malignant and unspecified (incl cysts and polyps) |
| Mycosis fungoides stage II      | Mycoses fungoides                                                               | Lymphomas non-Hodgkin's T-cell                                  | Neoplasms benign, malignant and unspecified (incl cysts and polyps) |
| Mycosis fungoides stage III     | Mycoses fungoides                                                               | Lymphomas non-Hodgkin's T-cell                                  | Neoplasms benign, malignant and unspecified (incl cysts and polyps) |
| Mycosis fungoides stage IV      | Mycoses fungoides                                                               | Lymphomas non-Hodgkin's T-cell                                  | Neoplasms benign, malignant and unspecified (incl cysts and polyps) |
| Myeloid leukaemia               | Leukaemias myeloid NEC                                                          | Leukaemias                                                      | Neoplasms benign, malignant and unspecified (incl cysts and polyps) |
| Nasal cavity cancer             | Paranasal sinus and nasal cavity neoplasms malignant and unspecified            | Respiratory and mediastinal neoplasms malignant and unspecified | Neoplasms benign, malignant and unspecified (incl cysts and polyps) |
| Nasal sinus cancer              | Paranasal sinus and nasal cavity neoplasms malignant and unspecified            | Respiratory and mediastinal neoplasms malignant and unspecified | Neoplasms benign, malignant and unspecified (incl cysts and polyps) |
| Nasopharyngeal cancer recurrent | Oropharyngeal, nasopharyngeal and tonsillar neoplasms malignant and unspecified | Respiratory and mediastinal neoplasms malignant and unspecified | Neoplasms benign, malignant and unspecified (incl cysts and polyps) |
| Nasopharyngeal cancer stage 0   | Oropharyngeal, nasopharyngeal and tonsillar neoplasms malignant and unspecified | Respiratory and mediastinal neoplasms malignant and unspecified | Neoplasms benign, malignant and unspecified (incl cysts and polyps) |
| Nasopharyngeal cancer stage I   | Oropharyngeal, nasopharyngeal and tonsillar neoplasms malignant and unspecified | Respiratory and mediastinal neoplasms malignant and unspecified | Neoplasms benign, malignant and unspecified (incl cysts and polyps) |

|                                                |                                                                                 |                                                                        |                                                                     |
|------------------------------------------------|---------------------------------------------------------------------------------|------------------------------------------------------------------------|---------------------------------------------------------------------|
| Nasopharyngeal cancer stage II                 | Oropharyngeal, nasopharyngeal and tonsillar neoplasms malignant and unspecified | Respiratory and mediastinal neoplasms malignant and unspecified        | Neoplasms benign, malignant and unspecified (incl cysts and polyps) |
| Nasopharyngeal cancer stage III                | Oropharyngeal, nasopharyngeal and tonsillar neoplasms malignant and unspecified | Respiratory and mediastinal neoplasms malignant and unspecified        | Neoplasms benign, malignant and unspecified (incl cysts and polyps) |
| Nasopharyngeal cancer stage IV                 | Oropharyngeal, nasopharyngeal and tonsillar neoplasms malignant and unspecified | Respiratory and mediastinal neoplasms malignant and unspecified        | Neoplasms benign, malignant and unspecified (incl cysts and polyps) |
| Natural killer-cell leukaemia                  | Leukaemias chronic T-cell                                                       | Leukaemias                                                             | Neoplasms benign, malignant and unspecified (incl cysts and polyps) |
| Neonatal leukaemia                             | Haematological disorders congenital NEC                                         | Blood and lymphatic system disorders congenital                        | Congenital, familial and genetic disorders                          |
| Neoplasm malignant                             | Neoplasms malignant site unspecified NEC                                        | Miscellaneous and site unspecified neoplasms malignant and unspecified | Neoplasms benign, malignant and unspecified (incl cysts and polyps) |
| Nephroblastoma                                 | Renal neoplasms malignant                                                       | Renal and urinary tract neoplasms malignant and unspecified            | Neoplasms benign, malignant and unspecified (incl cysts and polyps) |
| Neuroblastoma                                  | Nervous system neoplasms malignant NEC                                          | Nervous system neoplasms malignant and unspecified NEC                 | Neoplasms benign, malignant and unspecified (incl cysts and polyps) |
| Neuroendocrine carcinoma of the skin           | Skin neoplasms malignant and unspecified (excl melanoma)                        | Skin neoplasms malignant and unspecified                               | Neoplasms benign, malignant and unspecified (incl cysts and polyps) |
| Neurofibrosarcoma metastatic                   | Neurofibrosarcomas                                                              | Soft tissue neoplasms malignant and unspecified                        | Neoplasms benign, malignant and unspecified (incl cysts and polyps) |
| Neurofibrosarcoma recurrent                    | Neurofibrosarcomas                                                              | Soft tissue neoplasms malignant and unspecified                        | Neoplasms benign, malignant and unspecified (incl cysts and polyps) |
| Nodal marginal zone B-cell lymphoma            | Nodal marginal zone B-cell lymphomas                                            | Lymphomas non-Hodgkin's B-cell                                         | Neoplasms benign, malignant and unspecified (incl cysts and polyps) |
| Nodal marginal zone B-cell lymphoma recurrent  | Nodal marginal zone B-cell lymphomas                                            | Lymphomas non-Hodgkin's B-cell                                         | Neoplasms benign, malignant and unspecified (incl cysts and polyps) |
| Nodal marginal zone B-cell lymphoma refractory | Nodal marginal zone B-cell lymphomas                                            | Lymphomas non-Hodgkin's B-cell                                         | Neoplasms benign, malignant and unspecified (incl cysts and polyps) |

|                                               |                                                                                 |                                                                 |                                                                     |
|-----------------------------------------------|---------------------------------------------------------------------------------|-----------------------------------------------------------------|---------------------------------------------------------------------|
| Nodal marginal zone B-cell lymphoma stage I   | Nodal marginal zone B-cell lymphomas                                            | Lymphomas non-Hodgkin's B-cell                                  | Neoplasms benign, malignant and unspecified (incl cysts and polyps) |
| Nodal marginal zone B-cell lymphoma stage II  | Nodal marginal zone B-cell lymphomas                                            | Lymphomas non-Hodgkin's B-cell                                  | Neoplasms benign, malignant and unspecified (incl cysts and polyps) |
| Nodal marginal zone B-cell lymphoma stage III | Nodal marginal zone B-cell lymphomas                                            | Lymphomas non-Hodgkin's B-cell                                  | Neoplasms benign, malignant and unspecified (incl cysts and polyps) |
| Nodal marginal zone B-cell lymphoma stage IV  | Nodal marginal zone B-cell lymphomas                                            | Lymphomas non-Hodgkin's B-cell                                  | Neoplasms benign, malignant and unspecified (incl cysts and polyps) |
| Nodular melanoma                              | Skin melanomas (excl ocular)                                                    | Skin neoplasms malignant and unspecified                        | Neoplasms benign, malignant and unspecified (incl cysts and polyps) |
| Non-small cell lung cancer recurrent          | Non-small cell neoplasms malignant of the respiratory tract cell type specified | Respiratory and mediastinal neoplasms malignant and unspecified | Neoplasms benign, malignant and unspecified (incl cysts and polyps) |
| Non-small cell lung cancer stage 0            | Non-small cell neoplasms malignant of the respiratory tract cell type specified | Respiratory and mediastinal neoplasms malignant and unspecified | Neoplasms benign, malignant and unspecified (incl cysts and polyps) |
| Non-small cell lung cancer stage I            | Non-small cell neoplasms malignant of the respiratory tract cell type specified | Respiratory and mediastinal neoplasms malignant and unspecified | Neoplasms benign, malignant and unspecified (incl cysts and polyps) |
| Non-small cell lung cancer stage II           | Non-small cell neoplasms malignant of the respiratory tract cell type specified | Respiratory and mediastinal neoplasms malignant and unspecified | Neoplasms benign, malignant and unspecified (incl cysts and polyps) |
| Non-small cell lung cancer stage III          | Non-small cell neoplasms malignant of the respiratory tract cell type specified | Respiratory and mediastinal neoplasms malignant and unspecified | Neoplasms benign, malignant and unspecified (incl cysts and polyps) |
| Non-small cell lung cancer stage IIIA         | Non-small cell neoplasms malignant of the respiratory tract cell type specified | Respiratory and mediastinal neoplasms malignant and unspecified | Neoplasms benign, malignant and unspecified (incl cysts and polyps) |
| Non-small cell lung cancer stage IIIB         | Non-small cell neoplasms malignant of the respiratory tract cell type specified | Respiratory and mediastinal neoplasms malignant and unspecified | Neoplasms benign, malignant and unspecified (incl cysts and polyps) |
| Non-small cell lung cancer stage IV           | Non-small cell neoplasms malignant of the respiratory tract cell type specified | Respiratory and mediastinal neoplasms malignant and unspecified | Neoplasms benign, malignant and unspecified (incl cysts and polyps) |
| Non-Hodgkin's lymphoma                        | Non-Hodgkin's lymphomas NEC                                                     | Lymphomas non-Hodgkin's unspecified histology                   | Neoplasms benign, malignant and unspecified (incl cysts and polyps) |

|                                                                    |                                                          |                                               |                                                                     |
|--------------------------------------------------------------------|----------------------------------------------------------|-----------------------------------------------|---------------------------------------------------------------------|
| Non-Hodgkin's lymphoma recurrent                                   | Non-Hodgkin's lymphomas NEC                              | Lymphomas non-Hodgkin's unspecified histology | Neoplasms benign, malignant and unspecified (incl cysts and polyps) |
| Non-Hodgkin's lymphoma refractory                                  | Non-Hodgkin's lymphomas NEC                              | Lymphomas non-Hodgkin's unspecified histology | Neoplasms benign, malignant and unspecified (incl cysts and polyps) |
| Non-Hodgkin's lymphoma stage I                                     | Non-Hodgkin's lymphomas NEC                              | Lymphomas non-Hodgkin's unspecified histology | Neoplasms benign, malignant and unspecified (incl cysts and polyps) |
| Non-Hodgkin's lymphoma stage II                                    | Non-Hodgkin's lymphomas NEC                              | Lymphomas non-Hodgkin's unspecified histology | Neoplasms benign, malignant and unspecified (incl cysts and polyps) |
| Non-Hodgkin's lymphoma stage III                                   | Non-Hodgkin's lymphomas NEC                              | Lymphomas non-Hodgkin's unspecified histology | Neoplasms benign, malignant and unspecified (incl cysts and polyps) |
| Non-Hodgkin's lymphoma stage IV                                    | Non-Hodgkin's lymphomas NEC                              | Lymphomas non-Hodgkin's unspecified histology | Neoplasms benign, malignant and unspecified (incl cysts and polyps) |
| Non-Hodgkin's lymphoma unspecified histology aggressive recurrent  | Non-Hodgkin's lymphomas unspecified histology aggressive | Lymphomas non-Hodgkin's unspecified histology | Neoplasms benign, malignant and unspecified (incl cysts and polyps) |
| Non-Hodgkin's lymphoma unspecified histology aggressive refractory | Non-Hodgkin's lymphomas unspecified histology aggressive | Lymphomas non-Hodgkin's unspecified histology | Neoplasms benign, malignant and unspecified (incl cysts and polyps) |
| Non-Hodgkin's lymphoma unspecified histology aggressive stage I    | Non-Hodgkin's lymphomas unspecified histology aggressive | Lymphomas non-Hodgkin's unspecified histology | Neoplasms benign, malignant and unspecified (incl cysts and polyps) |
| Non-Hodgkin's lymphoma unspecified histology aggressive stage II   | Non-Hodgkin's lymphomas unspecified histology aggressive | Lymphomas non-Hodgkin's unspecified histology | Neoplasms benign, malignant and unspecified (incl cysts and polyps) |
| Non-Hodgkin's lymphoma unspecified histology aggressive stage III  | Non-Hodgkin's lymphomas unspecified histology aggressive | Lymphomas non-Hodgkin's unspecified histology | Neoplasms benign, malignant and unspecified (incl cysts and polyps) |
| Non-Hodgkin's lymphoma unspecified histology aggressive stage IV   | Non-Hodgkin's lymphomas unspecified histology aggressive | Lymphomas non-Hodgkin's unspecified histology | Neoplasms benign, malignant and unspecified (incl cysts and polyps) |
| Non-Hodgkin's lymphoma unspecified histology indolent stage I      | Non-Hodgkin's lymphomas unspecified histology indolent   | Lymphomas non-Hodgkin's unspecified histology | Neoplasms benign, malignant and unspecified (incl cysts and polyps) |
| Non-Hodgkin's lymphoma unspecified histology indolent stage II     | Non-Hodgkin's lymphomas unspecified histology indolent   | Lymphomas non-Hodgkin's unspecified histology | Neoplasms benign, malignant and unspecified (incl cysts and polyps) |

|                                                                 |                                                        |                                                      |                                                                     |
|-----------------------------------------------------------------|--------------------------------------------------------|------------------------------------------------------|---------------------------------------------------------------------|
| Non-Hodgkin's lymphoma unspecified histology indolent stage III | Non-Hodgkin's lymphomas unspecified histology indolent | Lymphomas non-Hodgkin's unspecified histology        | Neoplasms benign, malignant and unspecified (incl cysts and polyps) |
| Non-Hodgkin's lymphoma unspecified histology indolent stage IV  | Non-Hodgkin's lymphomas unspecified histology indolent | Lymphomas non-Hodgkin's unspecified histology        | Neoplasms benign, malignant and unspecified (incl cysts and polyps) |
| Oesophageal adenocarcinoma                                      | Oesophageal neoplasms malignant                        | Gastrointestinal neoplasms malignant and unspecified | Neoplasms benign, malignant and unspecified (incl cysts and polyps) |
| Oesophageal adenocarcinoma recurrent                            | Oesophageal neoplasms malignant                        | Gastrointestinal neoplasms malignant and unspecified | Neoplasms benign, malignant and unspecified (incl cysts and polyps) |
| Oesophageal adenocarcinoma stage 0                              | Oesophageal neoplasms malignant                        | Gastrointestinal neoplasms malignant and unspecified | Neoplasms benign, malignant and unspecified (incl cysts and polyps) |
| Oesophageal adenocarcinoma stage I                              | Oesophageal neoplasms malignant                        | Gastrointestinal neoplasms malignant and unspecified | Neoplasms benign, malignant and unspecified (incl cysts and polyps) |
| Oesophageal adenocarcinoma stage II                             | Oesophageal neoplasms malignant                        | Gastrointestinal neoplasms malignant and unspecified | Neoplasms benign, malignant and unspecified (incl cysts and polyps) |
| Oesophageal adenocarcinoma stage III                            | Oesophageal neoplasms malignant                        | Gastrointestinal neoplasms malignant and unspecified | Neoplasms benign, malignant and unspecified (incl cysts and polyps) |
| Oesophageal adenocarcinoma stage IV                             | Oesophageal neoplasms malignant                        | Gastrointestinal neoplasms malignant and unspecified | Neoplasms benign, malignant and unspecified (incl cysts and polyps) |
| Oesophageal carcinoma                                           | Oesophageal neoplasms malignant                        | Gastrointestinal neoplasms malignant and unspecified | Neoplasms benign, malignant and unspecified (incl cysts and polyps) |
| Oesophageal carcinoma recurrent                                 | Oesophageal neoplasms malignant                        | Gastrointestinal neoplasms malignant and unspecified | Neoplasms benign, malignant and unspecified (incl cysts and polyps) |
| Oesophageal carcinoma stage 0                                   | Oesophageal neoplasms malignant                        | Gastrointestinal neoplasms malignant and unspecified | Neoplasms benign, malignant and unspecified (incl cysts and polyps) |
| Oesophageal squamous cell carcinoma recurrent                   | Oesophageal neoplasms malignant                        | Gastrointestinal neoplasms malignant and unspecified | Neoplasms benign, malignant and unspecified (incl cysts and polyps) |
| Oesophageal squamous cell carcinoma stage 0                     | Oesophageal neoplasms malignant                        | Gastrointestinal neoplasms malignant and unspecified | Neoplasms benign, malignant and unspecified (incl cysts and polyps) |

|                                               |                                                                                 |                                                                 |                                                                     |
|-----------------------------------------------|---------------------------------------------------------------------------------|-----------------------------------------------------------------|---------------------------------------------------------------------|
| Oesophageal squamous cell carcinoma stage I   | Oesophageal neoplasms malignant                                                 | Gastrointestinal neoplasms malignant and unspecified            | Neoplasms benign, malignant and unspecified (incl cysts and polyps) |
| Oesophageal squamous cell carcinoma stage II  | Oesophageal neoplasms malignant                                                 | Gastrointestinal neoplasms malignant and unspecified            | Neoplasms benign, malignant and unspecified (incl cysts and polyps) |
| Oesophageal squamous cell carcinoma stage III | Oesophageal neoplasms malignant                                                 | Gastrointestinal neoplasms malignant and unspecified            | Neoplasms benign, malignant and unspecified (incl cysts and polyps) |
| Oesophageal squamous cell carcinoma stage IV  | Oesophageal neoplasms malignant                                                 | Gastrointestinal neoplasms malignant and unspecified            | Neoplasms benign, malignant and unspecified (incl cysts and polyps) |
| Oligodendroglioma                             | Nervous system neoplasms unspecified malignancy NEC                             | Nervous system neoplasms malignant and unspecified NEC          | Neoplasms benign, malignant and unspecified (incl cysts and polyps) |
| Oropharyngeal cancer                          | Oropharyngeal, nasopharyngeal and tonsillar neoplasms malignant and unspecified | Respiratory and mediastinal neoplasms malignant and unspecified | Neoplasms benign, malignant and unspecified (incl cysts and polyps) |
| Oropharyngeal cancer recurrent                | Oropharyngeal, nasopharyngeal and tonsillar neoplasms malignant and unspecified | Respiratory and mediastinal neoplasms malignant and unspecified | Neoplasms benign, malignant and unspecified (incl cysts and polyps) |
| Oropharyngeal cancer stage 0                  | Oropharyngeal, nasopharyngeal and tonsillar neoplasms malignant and unspecified | Respiratory and mediastinal neoplasms malignant and unspecified | Neoplasms benign, malignant and unspecified (incl cysts and polyps) |
| Oropharyngeal cancer stage I                  | Oropharyngeal, nasopharyngeal and tonsillar neoplasms malignant and unspecified | Respiratory and mediastinal neoplasms malignant and unspecified | Neoplasms benign, malignant and unspecified (incl cysts and polyps) |
| Oropharyngeal cancer stage II                 | Oropharyngeal, nasopharyngeal and tonsillar neoplasms malignant and unspecified | Respiratory and mediastinal neoplasms malignant and unspecified | Neoplasms benign, malignant and unspecified (incl cysts and polyps) |
| Oropharyngeal cancer stage III                | Oropharyngeal, nasopharyngeal and tonsillar neoplasms malignant and unspecified | Respiratory and mediastinal neoplasms malignant and unspecified | Neoplasms benign, malignant and unspecified (incl cysts and polyps) |
| Oropharyngeal lymphoepithelioma               | Oropharyngeal, nasopharyngeal and tonsillar neoplasms malignant and unspecified | Respiratory and mediastinal neoplasms malignant and unspecified | Neoplasms benign, malignant and unspecified (incl cysts and polyps) |
| Oropharyngeal squamous cell carcinoma         | Oropharyngeal, nasopharyngeal and tonsillar neoplasms malignant and unspecified | Respiratory and mediastinal neoplasms malignant and unspecified | Neoplasms benign, malignant and unspecified (incl cysts and polyps) |
| Osteosarcoma                                  | Bone sarcomas                                                                   | Skeletal neoplasms malignant and unspecified                    | Neoplasms benign, malignant and unspecified (incl cysts and polyps) |



|                                           |                                              |                                                         |                                                                     |
|-------------------------------------------|----------------------------------------------|---------------------------------------------------------|---------------------------------------------------------------------|
| Osteosarcoma metastatic                   | Bone sarcomas                                | Skeletal neoplasms malignant and unspecified            | Neoplasms benign, malignant and unspecified (incl cysts and polyps) |
| Osteosarcoma recurrent                    | Bone sarcomas                                | Skeletal neoplasms malignant and unspecified            | Neoplasms benign, malignant and unspecified (incl cysts and polyps) |
| Ovarian cancer                            | Ovarian neoplasms malignant (excl germ cell) | Reproductive neoplasms female malignant and unspecified | Neoplasms benign, malignant and unspecified (incl cysts and polyps) |
| Ovarian dysgerminoma stage I              | Ovarian germ cell neoplasms malignant        | Reproductive neoplasms female malignant and unspecified | Neoplasms benign, malignant and unspecified (incl cysts and polyps) |
| Ovarian dysgerminoma stage II             | Ovarian germ cell neoplasms malignant        | Reproductive neoplasms female malignant and unspecified | Neoplasms benign, malignant and unspecified (incl cysts and polyps) |
| Ovarian dysgerminoma stage III            | Ovarian germ cell neoplasms malignant        | Reproductive neoplasms female malignant and unspecified | Neoplasms benign, malignant and unspecified (incl cysts and polyps) |
| Ovarian dysgerminoma stage IV             | Ovarian germ cell neoplasms malignant        | Reproductive neoplasms female malignant and unspecified | Neoplasms benign, malignant and unspecified (incl cysts and polyps) |
| Ovarian epithelial cancer metastatic      | Ovarian neoplasms malignant (excl germ cell) | Reproductive neoplasms female malignant and unspecified | Neoplasms benign, malignant and unspecified (incl cysts and polyps) |
| Ovarian epithelial cancer recurrent       | Ovarian neoplasms malignant (excl germ cell) | Reproductive neoplasms female malignant and unspecified | Neoplasms benign, malignant and unspecified (incl cysts and polyps) |
| Ovarian epithelial cancer stage I         | Ovarian neoplasms malignant (excl germ cell) | Reproductive neoplasms female malignant and unspecified | Neoplasms benign, malignant and unspecified (incl cysts and polyps) |
| Ovarian epithelial cancer stage II        | Ovarian neoplasms malignant (excl germ cell) | Reproductive neoplasms female malignant and unspecified | Neoplasms benign, malignant and unspecified (incl cysts and polyps) |
| Ovarian epithelial cancer stage III       | Ovarian neoplasms malignant (excl germ cell) | Reproductive neoplasms female malignant and unspecified | Neoplasms benign, malignant and unspecified (incl cysts and polyps) |
| Ovarian epithelial cancer stage IV        | Ovarian neoplasms malignant (excl germ cell) | Reproductive neoplasms female malignant and unspecified | Neoplasms benign, malignant and unspecified (incl cysts and polyps) |
| Ovarian germ cell choriocarcinoma stage I | Ovarian germ cell neoplasms malignant        | Reproductive neoplasms female malignant and unspecified | Neoplasms benign, malignant and unspecified (incl cysts and polyps) |

|                                                     |                                       |                                                         |                                                                     |
|-----------------------------------------------------|---------------------------------------|---------------------------------------------------------|---------------------------------------------------------------------|
| Ovarian germ cell choriocarcinoma stage II          | Ovarian germ cell neoplasms malignant | Reproductive neoplasms female malignant and unspecified | Neoplasms benign, malignant and unspecified (incl cysts and polyps) |
| Ovarian germ cell choriocarcinoma stage III         | Ovarian germ cell neoplasms malignant | Reproductive neoplasms female malignant and unspecified | Neoplasms benign, malignant and unspecified (incl cysts and polyps) |
| Ovarian germ cell choriocarcinoma stage IV          | Ovarian germ cell neoplasms malignant | Reproductive neoplasms female malignant and unspecified | Neoplasms benign, malignant and unspecified (incl cysts and polyps) |
| Ovarian germ cell embryonal carcinoma stage I       | Ovarian germ cell neoplasms malignant | Reproductive neoplasms female malignant and unspecified | Neoplasms benign, malignant and unspecified (incl cysts and polyps) |
| Ovarian germ cell embryonal carcinoma stage II      | Ovarian germ cell neoplasms malignant | Reproductive neoplasms female malignant and unspecified | Neoplasms benign, malignant and unspecified (incl cysts and polyps) |
| Ovarian germ cell embryonal carcinoma stage III     | Ovarian germ cell neoplasms malignant | Reproductive neoplasms female malignant and unspecified | Neoplasms benign, malignant and unspecified (incl cysts and polyps) |
| Ovarian germ cell embryonal carcinoma stage IV      | Ovarian germ cell neoplasms malignant | Reproductive neoplasms female malignant and unspecified | Neoplasms benign, malignant and unspecified (incl cysts and polyps) |
| Ovarian germ cell endodermal sinus tumour stage I   | Ovarian germ cell neoplasms malignant | Reproductive neoplasms female malignant and unspecified | Neoplasms benign, malignant and unspecified (incl cysts and polyps) |
| Ovarian germ cell endodermal sinus tumour stage II  | Ovarian germ cell neoplasms malignant | Reproductive neoplasms female malignant and unspecified | Neoplasms benign, malignant and unspecified (incl cysts and polyps) |
| Ovarian germ cell endodermal sinus tumour stage III | Ovarian germ cell neoplasms malignant | Reproductive neoplasms female malignant and unspecified | Neoplasms benign, malignant and unspecified (incl cysts and polyps) |
| Ovarian germ cell endodermal sinus tumour stage IV  | Ovarian germ cell neoplasms malignant | Reproductive neoplasms female malignant and unspecified | Neoplasms benign, malignant and unspecified (incl cysts and polyps) |
| Ovarian germ cell polyembryoma stage I              | Ovarian germ cell neoplasms malignant | Reproductive neoplasms female malignant and unspecified | Neoplasms benign, malignant and unspecified (incl cysts and polyps) |
| Ovarian germ cell polyembryoma stage II             | Ovarian germ cell neoplasms malignant | Reproductive neoplasms female malignant and unspecified | Neoplasms benign, malignant and unspecified (incl cysts and polyps) |
| Ovarian germ cell polyembryoma stage III            | Ovarian germ cell neoplasms malignant | Reproductive neoplasms female malignant and unspecified | Neoplasms benign, malignant and unspecified (incl cysts and polyps) |

|                                         |                                                                             |                                                                 |                                                                     |
|-----------------------------------------|-----------------------------------------------------------------------------|-----------------------------------------------------------------|---------------------------------------------------------------------|
| Ovarian germ cell polyembryoma stage IV | Ovarian germ cell neoplasms malignant                                       | Reproductive neoplasms female malignant and unspecified         | Neoplasms benign, malignant and unspecified (incl cysts and polyps) |
| Ovarian germ cell teratoma stage I      | Ovarian germ cell neoplasms malignant                                       | Reproductive neoplasms female malignant and unspecified         | Neoplasms benign, malignant and unspecified (incl cysts and polyps) |
| Ovarian germ cell teratoma stage II     | Ovarian germ cell neoplasms malignant                                       | Reproductive neoplasms female malignant and unspecified         | Neoplasms benign, malignant and unspecified (incl cysts and polyps) |
| Ovarian germ cell teratoma stage III    | Ovarian germ cell neoplasms malignant                                       | Reproductive neoplasms female malignant and unspecified         | Neoplasms benign, malignant and unspecified (incl cysts and polyps) |
| Ovarian germ cell teratoma stage IV     | Ovarian germ cell neoplasms malignant                                       | Reproductive neoplasms female malignant and unspecified         | Neoplasms benign, malignant and unspecified (incl cysts and polyps) |
| Ovarian low malignant potential tumour  | Ovarian neoplasms malignant (excl germ cell)                                | Reproductive neoplasms female malignant and unspecified         | Neoplasms benign, malignant and unspecified (incl cysts and polyps) |
| Paget's disease of nipple               | Breast and nipple neoplasms malignant                                       | Breast neoplasms malignant and unspecified (incl nipple)        | Neoplasms benign, malignant and unspecified (incl cysts and polyps) |
| Paget's disease of penis                | Penile neoplasms malignant                                                  | Reproductive neoplasms male malignant and unspecified           | Neoplasms benign, malignant and unspecified (incl cysts and polyps) |
| Paget's disease of skin                 | Skin neoplasms malignant and unspecified (excl melanoma)                    | Skin neoplasms malignant and unspecified                        | Neoplasms benign, malignant and unspecified (incl cysts and polyps) |
| Paget's disease of the vulva            | Vulval neoplasms malignant                                                  | Reproductive neoplasms female malignant and unspecified         | Neoplasms benign, malignant and unspecified (incl cysts and polyps) |
| Pancoast's tumour                       | Respiratory tract and pleural neoplasms malignant cell type unspecified NEC | Respiratory and mediastinal neoplasms malignant and unspecified | Neoplasms benign, malignant and unspecified (incl cysts and polyps) |
| Pancreatic carcinoma                    | Pancreatic neoplasms malignant (excl islet cell and carcinoid)              | Gastrointestinal neoplasms malignant and unspecified            | Neoplasms benign, malignant and unspecified (incl cysts and polyps) |
| Pancreatic carcinoma metastatic         | Pancreatic neoplasms malignant (excl islet cell and carcinoid)              | Gastrointestinal neoplasms malignant and unspecified            | Neoplasms benign, malignant and unspecified (incl cysts and polyps) |
| Pancreatic carcinoma recurrent          | Pancreatic neoplasms malignant (excl islet cell and carcinoid)              | Gastrointestinal neoplasms malignant and unspecified            | Neoplasms benign, malignant and unspecified (incl cysts and polyps) |

|                                                               |                                                                      |                                                                 |                                                                     |
|---------------------------------------------------------------|----------------------------------------------------------------------|-----------------------------------------------------------------|---------------------------------------------------------------------|
| Papillary serous endometrial carcinoma                        | Endometrial neoplasms malignant                                      | Reproductive neoplasms female malignant and unspecified         | Neoplasms benign, malignant and unspecified (incl cysts and polyps) |
| Papillary thyroid cancer                                      | Thyroid neoplasms malignant                                          | Endocrine neoplasms malignant and unspecified                   | Neoplasms benign, malignant and unspecified (incl cysts and polyps) |
| Paraganglion neoplasm malignant                               | Endocrine neoplasms malignant and unspecified NEC                    | Endocrine neoplasms malignant and unspecified                   | Neoplasms benign, malignant and unspecified (incl cysts and polyps) |
| Paranasal sinus and nasal cavity malignant neoplasm recurrent | Paranasal sinus and nasal cavity neoplasms malignant and unspecified | Respiratory and mediastinal neoplasms malignant and unspecified | Neoplasms benign, malignant and unspecified (incl cysts and polyps) |
| Paranasal sinus and nasal cavity malignant neoplasm stage 0   | Paranasal sinus and nasal cavity neoplasms malignant and unspecified | Respiratory and mediastinal neoplasms malignant and unspecified | Neoplasms benign, malignant and unspecified (incl cysts and polyps) |
| Paranasal sinus and nasal cavity malignant neoplasm stage I   | Paranasal sinus and nasal cavity neoplasms malignant and unspecified | Respiratory and mediastinal neoplasms malignant and unspecified | Neoplasms benign, malignant and unspecified (incl cysts and polyps) |
| Paranasal sinus and nasal cavity malignant neoplasm stage II  | Paranasal sinus and nasal cavity neoplasms malignant and unspecified | Respiratory and mediastinal neoplasms malignant and unspecified | Neoplasms benign, malignant and unspecified (incl cysts and polyps) |
| Paranasal sinus and nasal cavity malignant neoplasm stage III | Paranasal sinus and nasal cavity neoplasms malignant and unspecified | Respiratory and mediastinal neoplasms malignant and unspecified | Neoplasms benign, malignant and unspecified (incl cysts and polyps) |
| Paranasal sinus and nasal cavity malignant neoplasm stage IV  | Paranasal sinus and nasal cavity neoplasms malignant and unspecified | Respiratory and mediastinal neoplasms malignant and unspecified | Neoplasms benign, malignant and unspecified (incl cysts and polyps) |
| Parathyroid tumour malignant                                  | Endocrine neoplasms malignant and unspecified NEC                    | Endocrine neoplasms malignant and unspecified                   | Neoplasms benign, malignant and unspecified (incl cysts and polyps) |
| Penile cancer                                                 | Penile neoplasms malignant                                           | Reproductive neoplasms male malignant and unspecified           | Neoplasms benign, malignant and unspecified (incl cysts and polyps) |
| Penis carcinoma metastatic                                    | Penile neoplasms malignant                                           | Reproductive neoplasms male malignant and unspecified           | Neoplasms benign, malignant and unspecified (incl cysts and polyps) |
| Penis carcinoma recurrent                                     | Penile neoplasms malignant                                           | Reproductive neoplasms male malignant and unspecified           | Neoplasms benign, malignant and unspecified (incl cysts and polyps) |
| Penis carcinoma stage I                                       | Penile neoplasms malignant                                           | Reproductive neoplasms male malignant and unspecified           | Neoplasms benign, malignant and unspecified (incl cysts and polyps) |

|                                                   |                                         |                                                        |                                                                     |
|---------------------------------------------------|-----------------------------------------|--------------------------------------------------------|---------------------------------------------------------------------|
| Penis carcinoma stage II                          | Penile neoplasms malignant              | Reproductive neoplasms male malignant and unspecified  | Neoplasms benign, malignant and unspecified (incl cysts and polyps) |
| Penis carcinoma stage III                         | Penile neoplasms malignant              | Reproductive neoplasms male malignant and unspecified  | Neoplasms benign, malignant and unspecified (incl cysts and polyps) |
| Penis carcinoma stage IV                          | Penile neoplasms malignant              | Reproductive neoplasms male malignant and unspecified  | Neoplasms benign, malignant and unspecified (incl cysts and polyps) |
| Pericardial mesothelioma malignant recurrent      | Mesotheliomas malignant and unspecified | Mesotheliomas                                          | Neoplasms benign, malignant and unspecified (incl cysts and polyps) |
| Peripheral nerve sheath tumour malignant          | Nervous system neoplasms malignant NEC  | Nervous system neoplasms malignant and unspecified NEC | Neoplasms benign, malignant and unspecified (incl cysts and polyps) |
| Peripheral neuroepithelioma of bone metastatic    | Bone sarcomas                           | Skeletal neoplasms malignant and unspecified           | Neoplasms benign, malignant and unspecified (incl cysts and polyps) |
| Peripheral neuroepithelioma of bone recurrent     | Bone sarcomas                           | Skeletal neoplasms malignant and unspecified           | Neoplasms benign, malignant and unspecified (incl cysts and polyps) |
| Peripheral T-cell lymphoma unspecified            | Peripheral T-cell lymphomas NEC         | Lymphomas non-Hodgkin's T-cell                         | Neoplasms benign, malignant and unspecified (incl cysts and polyps) |
| Peripheral T-cell lymphoma unspecified recurrent  | Peripheral T-cell lymphomas NEC         | Lymphomas non-Hodgkin's T-cell                         | Neoplasms benign, malignant and unspecified (incl cysts and polyps) |
| Peripheral T-cell lymphoma unspecified refractory | Peripheral T-cell lymphomas NEC         | Lymphomas non-Hodgkin's T-cell                         | Neoplasms benign, malignant and unspecified (incl cysts and polyps) |
| Peripheral T-cell lymphoma unspecified stage I    | Peripheral T-cell lymphomas NEC         | Lymphomas non-Hodgkin's T-cell                         | Neoplasms benign, malignant and unspecified (incl cysts and polyps) |
| Peripheral T-cell lymphoma unspecified stage II   | Peripheral T-cell lymphomas NEC         | Lymphomas non-Hodgkin's T-cell                         | Neoplasms benign, malignant and unspecified (incl cysts and polyps) |
| Peripheral T-cell lymphoma unspecified stage III  | Peripheral T-cell lymphomas NEC         | Lymphomas non-Hodgkin's T-cell                         | Neoplasms benign, malignant and unspecified (incl cysts and polyps) |
| Peripheral T-cell lymphoma unspecified stage IV   | Peripheral T-cell lymphomas NEC         | Lymphomas non-Hodgkin's T-cell                         | Neoplasms benign, malignant and unspecified (incl cysts and polyps) |

|                                             |                                                |                                                                 |                                                                     |
|---------------------------------------------|------------------------------------------------|-----------------------------------------------------------------|---------------------------------------------------------------------|
| Peritoneal mesothelioma malignant recurrent | Mesotheliomas malignant and unspecified        | Mesotheliomas                                                   | Neoplasms benign, malignant and unspecified (incl cysts and polyps) |
| Pharyngeal cancer                           | Pharyngeal neoplasms malignant and unspecified | Respiratory and mediastinal neoplasms malignant and unspecified | Neoplasms benign, malignant and unspecified (incl cysts and polyps) |
| Pharyngeal cancer recurrent                 | Pharyngeal neoplasms malignant and unspecified | Respiratory and mediastinal neoplasms malignant and unspecified | Neoplasms benign, malignant and unspecified (incl cysts and polyps) |
| Pharyngeal cancer stage 0                   | Pharyngeal neoplasms malignant and unspecified | Respiratory and mediastinal neoplasms malignant and unspecified | Neoplasms benign, malignant and unspecified (incl cysts and polyps) |
| Pharyngeal cancer stage I                   | Pharyngeal neoplasms malignant and unspecified | Respiratory and mediastinal neoplasms malignant and unspecified | Neoplasms benign, malignant and unspecified (incl cysts and polyps) |
| Pharyngeal cancer stage II                  | Pharyngeal neoplasms malignant and unspecified | Respiratory and mediastinal neoplasms malignant and unspecified | Neoplasms benign, malignant and unspecified (incl cysts and polyps) |
| Pharyngeal cancer stage III                 | Pharyngeal neoplasms malignant and unspecified | Respiratory and mediastinal neoplasms malignant and unspecified | Neoplasms benign, malignant and unspecified (incl cysts and polyps) |
| Pharyngeal cancer stage IV                  | Pharyngeal neoplasms malignant and unspecified | Respiratory and mediastinal neoplasms malignant and unspecified | Neoplasms benign, malignant and unspecified (incl cysts and polyps) |
| Pineal germinoma                            | Pineal neoplasms                               | Nervous system neoplasms malignant and unspecified NEC          | Neoplasms benign, malignant and unspecified (incl cysts and polyps) |
| Plasma cell leukaemia                       | Plasma cell myelomas                           | Plasma cell neoplasms                                           | Neoplasms benign, malignant and unspecified (incl cysts and polyps) |
| Plasma cell myeloma                         | Plasma cell myelomas                           | Plasma cell neoplasms                                           | Neoplasms benign, malignant and unspecified (incl cysts and polyps) |
| Plasmacytoma                                | Plasma cell myelomas                           | Plasma cell neoplasms                                           | Neoplasms benign, malignant and unspecified (incl cysts and polyps) |
| Pleural mesothelioma                        | Mesotheliomas malignant and unspecified        | Mesotheliomas                                                   | Neoplasms benign, malignant and unspecified (incl cysts and polyps) |
| Pleural mesothelioma malignant recurrent    | Mesotheliomas malignant and unspecified        | Mesotheliomas                                                   | Neoplasms benign, malignant and unspecified (incl cysts and polyps) |

|                                                         |                                                |                                                                 |                                                                     |
|---------------------------------------------------------|------------------------------------------------|-----------------------------------------------------------------|---------------------------------------------------------------------|
| Posterior cancer                                        | Laryngeal neoplasms malignant                  | Respiratory and mediastinal neoplasms malignant and unspecified | Neoplasms benign, malignant and unspecified (incl cysts and polyps) |
| Precursor B-lymphoblastic lymphoma                      | Precursor B-lymphoblastic lymphomas            | Lymphomas non-Hodgkin's B-cell                                  | Neoplasms benign, malignant and unspecified (incl cysts and polyps) |
| Precursor B-lymphoblastic lymphoma stage I              | Precursor B-lymphoblastic lymphomas            | Lymphomas non-Hodgkin's B-cell                                  | Neoplasms benign, malignant and unspecified (incl cysts and polyps) |
| Precursor B-lymphoblastic lymphoma stage II             | Precursor B-lymphoblastic lymphomas            | Lymphomas non-Hodgkin's B-cell                                  | Neoplasms benign, malignant and unspecified (incl cysts and polyps) |
| Precursor B-lymphoblastic lymphoma stage III            | Precursor B-lymphoblastic lymphomas            | Lymphomas non-Hodgkin's B-cell                                  | Neoplasms benign, malignant and unspecified (incl cysts and polyps) |
| Precursor B-lymphoblastic lymphoma stage IV             | Precursor B-lymphoblastic lymphomas            | Lymphomas non-Hodgkin's B-cell                                  | Neoplasms benign, malignant and unspecified (incl cysts and polyps) |
| Precursor T-lymphoblastic lymphoma/leukaemia            | Precursor T-lymphoblastic lymphomas/leukaemias | Lymphomas non-Hodgkin's T-cell                                  | Neoplasms benign, malignant and unspecified (incl cysts and polyps) |
| Precursor T-lymphoblastic lymphoma/leukaemia recurrent  | Precursor T-lymphoblastic lymphomas/leukaemias | Lymphomas non-Hodgkin's T-cell                                  | Neoplasms benign, malignant and unspecified (incl cysts and polyps) |
| Precursor T-lymphoblastic lymphoma/leukaemia refractory | Precursor T-lymphoblastic lymphomas/leukaemias | Lymphomas non-Hodgkin's T-cell                                  | Neoplasms benign, malignant and unspecified (incl cysts and polyps) |
| Precursor T-lymphoblastic lymphoma/leukaemia stage I    | Precursor T-lymphoblastic lymphomas/leukaemias | Lymphomas non-Hodgkin's T-cell                                  | Neoplasms benign, malignant and unspecified (incl cysts and polyps) |
| Precursor T-lymphoblastic lymphoma/leukaemia stage II   | Precursor T-lymphoblastic lymphomas/leukaemias | Lymphomas non-Hodgkin's T-cell                                  | Neoplasms benign, malignant and unspecified (incl cysts and polyps) |
| Precursor T-lymphoblastic lymphoma/leukaemia stage III  | Precursor T-lymphoblastic lymphomas/leukaemias | Lymphomas non-Hodgkin's T-cell                                  | Neoplasms benign, malignant and unspecified (incl cysts and polyps) |
| Precursor T-lymphoblastic lymphoma/leukaemia stage IV   | Precursor T-lymphoblastic lymphomas/leukaemias | Lymphomas non-Hodgkin's T-cell                                  | Neoplasms benign, malignant and unspecified (incl cysts and polyps) |
| Primary mediastinal large B-cell lymphoma               | Primary mediastinal large B-cell lymphomas     | Lymphomas non-Hodgkin's B-cell                                  | Neoplasms benign, malignant and unspecified (incl cysts and polyps) |

|                                                      |                                            |                                                       |                                                                     |
|------------------------------------------------------|--------------------------------------------|-------------------------------------------------------|---------------------------------------------------------------------|
| Primary mediastinal large B-cell lymphoma recurrent  | Primary mediastinal large B-cell lymphomas | Lymphomas non-Hodgkin's B-cell                        | Neoplasms benign, malignant and unspecified (incl cysts and polyps) |
| Primary mediastinal large B-cell lymphoma refractory | Primary mediastinal large B-cell lymphomas | Lymphomas non-Hodgkin's B-cell                        | Neoplasms benign, malignant and unspecified (incl cysts and polyps) |
| Primary mediastinal large B-cell lymphoma stage I    | Primary mediastinal large B-cell lymphomas | Lymphomas non-Hodgkin's B-cell                        | Neoplasms benign, malignant and unspecified (incl cysts and polyps) |
| Primary mediastinal large B-cell lymphoma stage II   | Primary mediastinal large B-cell lymphomas | Lymphomas non-Hodgkin's B-cell                        | Neoplasms benign, malignant and unspecified (incl cysts and polyps) |
| Primary mediastinal large B-cell lymphoma stage III  | Primary mediastinal large B-cell lymphomas | Lymphomas non-Hodgkin's B-cell                        | Neoplasms benign, malignant and unspecified (incl cysts and polyps) |
| Primary mediastinal large B-cell lymphoma stage IV   | Primary mediastinal large B-cell lymphomas | Lymphomas non-Hodgkin's B-cell                        | Neoplasms benign, malignant and unspecified (incl cysts and polyps) |
| Prolymphocytic leukaemia                             | Leukaemias chronic lymphocytic             | Leukaemias                                            | Neoplasms benign, malignant and unspecified (incl cysts and polyps) |
| Prostate cancer metastatic                           | Prostatic neoplasms malignant              | Reproductive neoplasms male malignant and unspecified | Neoplasms benign, malignant and unspecified (incl cysts and polyps) |
| Prostate cancer recurrent                            | Prostatic neoplasms malignant              | Reproductive neoplasms male malignant and unspecified | Neoplasms benign, malignant and unspecified (incl cysts and polyps) |
| Prostate cancer stage 0                              | Prostatic neoplasms malignant              | Reproductive neoplasms male malignant and unspecified | Neoplasms benign, malignant and unspecified (incl cysts and polyps) |
| Prostate cancer stage I                              | Prostatic neoplasms malignant              | Reproductive neoplasms male malignant and unspecified | Neoplasms benign, malignant and unspecified (incl cysts and polyps) |
| Prostate cancer stage II                             | Prostatic neoplasms malignant              | Reproductive neoplasms male malignant and unspecified | Neoplasms benign, malignant and unspecified (incl cysts and polyps) |
| Prostate cancer stage III                            | Prostatic neoplasms malignant              | Reproductive neoplasms male malignant and unspecified | Neoplasms benign, malignant and unspecified (incl cysts and polyps) |
| Prostate cancer stage IV                             | Prostatic neoplasms malignant              | Reproductive neoplasms male malignant and unspecified | Neoplasms benign, malignant and unspecified (incl cysts and polyps) |



|                               |                                                              |                                                                           |                                                                        |
|-------------------------------|--------------------------------------------------------------|---------------------------------------------------------------------------|------------------------------------------------------------------------|
| Queyrat erythroplasia         | Neoplasms unspecified malignancy and site unspecified<br>NEC | Miscellaneous and site unspecified neoplasms<br>malignant and unspecified | Neoplasms benign, malignant and<br>unspecified (incl cysts and polyps) |
| Rectal adenocarcinoma         | Colorectal neoplasms malignant                               | Gastrointestinal neoplasms malignant and<br>unspecified                   | Neoplasms benign, malignant and<br>unspecified (incl cysts and polyps) |
| Rectal cancer                 | Colorectal neoplasms malignant                               | Gastrointestinal neoplasms malignant and<br>unspecified                   | Neoplasms benign, malignant and<br>unspecified (incl cysts and polyps) |
| Rectal cancer recurrent       | Colorectal neoplasms malignant                               | Gastrointestinal neoplasms malignant and<br>unspecified                   | Neoplasms benign, malignant and<br>unspecified (incl cysts and polyps) |
| Rectal cancer stage 0         | Colorectal neoplasms malignant                               | Gastrointestinal neoplasms malignant and<br>unspecified                   | Neoplasms benign, malignant and<br>unspecified (incl cysts and polyps) |
| Rectal cancer stage I         | Colorectal neoplasms malignant                               | Gastrointestinal neoplasms malignant and<br>unspecified                   | Neoplasms benign, malignant and<br>unspecified (incl cysts and polyps) |
| Rectal cancer stage II        | Colorectal neoplasms malignant                               | Gastrointestinal neoplasms malignant and<br>unspecified                   | Neoplasms benign, malignant and<br>unspecified (incl cysts and polyps) |
| Rectal cancer stage III       | Colorectal neoplasms malignant                               | Gastrointestinal neoplasms malignant and<br>unspecified                   | Neoplasms benign, malignant and<br>unspecified (incl cysts and polyps) |
| Rectal cancer stage IV        | Colorectal neoplasms malignant                               | Gastrointestinal neoplasms malignant and<br>unspecified                   | Neoplasms benign, malignant and<br>unspecified (incl cysts and polyps) |
| Rectosigmoid cancer           | Colorectal neoplasms malignant                               | Gastrointestinal neoplasms malignant and<br>unspecified                   | Neoplasms benign, malignant and<br>unspecified (incl cysts and polyps) |
| Rectosigmoid cancer recurrent | Colorectal neoplasms malignant                               | Gastrointestinal neoplasms malignant and<br>unspecified                   | Neoplasms benign, malignant and<br>unspecified (incl cysts and polyps) |
| Rectosigmoid cancer stage 0   | Colorectal neoplasms malignant                               | Gastrointestinal neoplasms malignant and<br>unspecified                   | Neoplasms benign, malignant and<br>unspecified (incl cysts and polyps) |
| Rectosigmoid cancer stage I   | Colorectal neoplasms malignant                               | Gastrointestinal neoplasms malignant and<br>unspecified                   | Neoplasms benign, malignant and<br>unspecified (incl cysts and polyps) |
| Rectosigmoid cancer stage II  | Colorectal neoplasms malignant                               | Gastrointestinal neoplasms malignant and<br>unspecified                   | Neoplasms benign, malignant and<br>unspecified (incl cysts and polyps) |

|                                |                                          |                                                                        |                                                                     |
|--------------------------------|------------------------------------------|------------------------------------------------------------------------|---------------------------------------------------------------------|
| Rectosigmoid cancer stage III  | Colorectal neoplasms malignant           | Gastrointestinal neoplasms malignant and unspecified                   | Neoplasms benign, malignant and unspecified (incl cysts and polyps) |
| Rectosigmoid cancer stage IV   | Colorectal neoplasms malignant           | Gastrointestinal neoplasms malignant and unspecified                   | Neoplasms benign, malignant and unspecified (incl cysts and polyps) |
| Recurrent cancer               | Neoplasms malignant site unspecified NEC | Miscellaneous and site unspecified neoplasms malignant and unspecified | Neoplasms benign, malignant and unspecified (incl cysts and polyps) |
| Renal cancer                   | Renal neoplasms malignant                | Renal and urinary tract neoplasms malignant and unspecified            | Neoplasms benign, malignant and unspecified (incl cysts and polyps) |
| Renal cancer recurrent         | Renal neoplasms malignant                | Renal and urinary tract neoplasms malignant and unspecified            | Neoplasms benign, malignant and unspecified (incl cysts and polyps) |
| Renal cancer stage I           | Renal neoplasms malignant                | Renal and urinary tract neoplasms malignant and unspecified            | Neoplasms benign, malignant and unspecified (incl cysts and polyps) |
| Renal cancer stage II          | Renal neoplasms malignant                | Renal and urinary tract neoplasms malignant and unspecified            | Neoplasms benign, malignant and unspecified (incl cysts and polyps) |
| Renal cancer stage III         | Renal neoplasms malignant                | Renal and urinary tract neoplasms malignant and unspecified            | Neoplasms benign, malignant and unspecified (incl cysts and polyps) |
| Renal cancer stage IV          | Renal neoplasms malignant                | Renal and urinary tract neoplasms malignant and unspecified            | Neoplasms benign, malignant and unspecified (incl cysts and polyps) |
| Renal cell carcinoma recurrent | Renal neoplasms malignant                | Renal and urinary tract neoplasms malignant and unspecified            | Neoplasms benign, malignant and unspecified (incl cysts and polyps) |
| Renal cell carcinoma stage I   | Renal neoplasms malignant                | Renal and urinary tract neoplasms malignant and unspecified            | Neoplasms benign, malignant and unspecified (incl cysts and polyps) |
| Renal cell carcinoma stage II  | Renal neoplasms malignant                | Renal and urinary tract neoplasms malignant and unspecified            | Neoplasms benign, malignant and unspecified (incl cysts and polyps) |
| Renal cell carcinoma stage III | Renal neoplasms malignant                | Renal and urinary tract neoplasms malignant and unspecified            | Neoplasms benign, malignant and unspecified (incl cysts and polyps) |
| Renal cell carcinoma stage IV  | Renal neoplasms malignant                | Renal and urinary tract neoplasms malignant and unspecified            | Neoplasms benign, malignant and unspecified (incl cysts and polyps) |

|                                     |                                                                             |                                                                 |                                                                     |
|-------------------------------------|-----------------------------------------------------------------------------|-----------------------------------------------------------------|---------------------------------------------------------------------|
| Respiratory tract carcinoma in situ | Respiratory tract and pleural neoplasms malignant cell type unspecified NEC | Respiratory and mediastinal neoplasms malignant and unspecified | Neoplasms benign, malignant and unspecified (incl cysts and polyps) |
| Retinal melanoma                    | Ocular melanomas                                                            | Ocular neoplasms                                                | Neoplasms benign, malignant and unspecified (incl cysts and polyps) |
| Retinoblastoma                      | Ocular neoplasms malignant (excl melanomas)                                 | Ocular neoplasms                                                | Neoplasms benign, malignant and unspecified (incl cysts and polyps) |
| Retroperitoneal cancer              | Gastrointestinal neoplasms malignant NEC                                    | Gastrointestinal neoplasms malignant and unspecified            | Neoplasms benign, malignant and unspecified (incl cysts and polyps) |
| Rhabdoid tumour of the kidney       | Renal neoplasms malignant                                                   | Renal and urinary tract neoplasms malignant and unspecified     | Neoplasms benign, malignant and unspecified (incl cysts and polyps) |
| Rhabdomyosarcoma                    | Rhabdomyosarcomas                                                           | Soft tissue neoplasms malignant and unspecified                 | Neoplasms benign, malignant and unspecified (incl cysts and polyps) |
| Rhabdomyosarcoma recurrent          | Rhabdomyosarcomas                                                           | Soft tissue neoplasms malignant and unspecified                 | Neoplasms benign, malignant and unspecified (incl cysts and polyps) |
| Salivary gland cancer recurrent     | Salivary gland neoplasms malignant                                          | Gastrointestinal neoplasms malignant and unspecified            | Neoplasms benign, malignant and unspecified (incl cysts and polyps) |
| Salivary gland cancer stage 0       | Salivary gland neoplasms malignant                                          | Gastrointestinal neoplasms malignant and unspecified            | Neoplasms benign, malignant and unspecified (incl cysts and polyps) |
| Salivary gland cancer stage I       | Salivary gland neoplasms malignant                                          | Gastrointestinal neoplasms malignant and unspecified            | Neoplasms benign, malignant and unspecified (incl cysts and polyps) |
| Salivary gland cancer stage II      | Salivary gland neoplasms malignant                                          | Gastrointestinal neoplasms malignant and unspecified            | Neoplasms benign, malignant and unspecified (incl cysts and polyps) |
| Salivary gland cancer stage III     | Salivary gland neoplasms malignant                                          | Gastrointestinal neoplasms malignant and unspecified            | Neoplasms benign, malignant and unspecified (incl cysts and polyps) |
| Salivary gland cancer stage IV      | Salivary gland neoplasms malignant                                          | Gastrointestinal neoplasms malignant and unspecified            | Neoplasms benign, malignant and unspecified (incl cysts and polyps) |
| Sarcoma                             | Soft tissue sarcomas histology unspecified                                  | Soft tissue neoplasms malignant and unspecified                 | Neoplasms benign, malignant and unspecified (incl cysts and polyps) |

|                                        |                                                          |                                                                        |                                                                     |
|----------------------------------------|----------------------------------------------------------|------------------------------------------------------------------------|---------------------------------------------------------------------|
| Sarcoma of skin                        | Soft tissue sarcomas histology unspecified               | Soft tissue neoplasms malignant and unspecified                        | Neoplasms benign, malignant and unspecified (incl cysts and polyps) |
| Sarcoma uterus                         | Soft tissue sarcomas histology unspecified               | Soft tissue neoplasms malignant and unspecified                        | Neoplasms benign, malignant and unspecified (incl cysts and polyps) |
| Sarcomatosis                           | Soft tissue sarcomas histology unspecified               | Soft tissue neoplasms malignant and unspecified                        | Neoplasms benign, malignant and unspecified (incl cysts and polyps) |
| Scrotal cancer                         | Reproductive neoplasms male malignant NEC                | Reproductive neoplasms male malignant and unspecified                  | Neoplasms benign, malignant and unspecified (incl cysts and polyps) |
| Second primary malignancy              | Neoplasms malignant site unspecified NEC                 | Miscellaneous and site unspecified neoplasms malignant and unspecified | Neoplasms benign, malignant and unspecified (incl cysts and polyps) |
| Seminoma                               | Testicular neoplasms malignant                           | Reproductive neoplasms male malignant and unspecified                  | Neoplasms benign, malignant and unspecified (incl cysts and polyps) |
| Skin cancer                            | Skin neoplasms malignant and unspecified (excl melanoma) | Skin neoplasms malignant and unspecified                               | Neoplasms benign, malignant and unspecified (incl cysts and polyps) |
| Small cell carcinoma                   | Neoplasms malignant site unspecified NEC                 | Miscellaneous and site unspecified neoplasms malignant and unspecified | Neoplasms benign, malignant and unspecified (incl cysts and polyps) |
| Small cell carcinoma of the cervix     | Cervix neoplasms malignant                               | Reproductive neoplasms female malignant and unspecified                | Neoplasms benign, malignant and unspecified (incl cysts and polyps) |
| Small cell lung cancer                 | Respiratory tract small cell carcinomas                  | Respiratory and mediastinal neoplasms malignant and unspecified        | Neoplasms benign, malignant and unspecified (incl cysts and polyps) |
| Small cell lung cancer extensive stage | Respiratory tract small cell carcinomas                  | Respiratory and mediastinal neoplasms malignant and unspecified        | Neoplasms benign, malignant and unspecified (incl cysts and polyps) |
| Small cell lung cancer limited stage   | Respiratory tract small cell carcinomas                  | Respiratory and mediastinal neoplasms malignant and unspecified        | Neoplasms benign, malignant and unspecified (incl cysts and polyps) |
| Small cell lung cancer recurrent       | Respiratory tract small cell carcinomas                  | Respiratory and mediastinal neoplasms malignant and unspecified        | Neoplasms benign, malignant and unspecified (incl cysts and polyps) |
| Small intestine carcinoma metastatic   | Small intestinal neoplasms malignant                     | Gastrointestinal neoplasms malignant and unspecified                   | Neoplasms benign, malignant and unspecified (incl cysts and polyps) |

|                                            |                                                                                 |                                                                        |                                                                     |
|--------------------------------------------|---------------------------------------------------------------------------------|------------------------------------------------------------------------|---------------------------------------------------------------------|
| Small intestine carcinoma recurrent        | Small intestinal neoplasms malignant                                            | Gastrointestinal neoplasms malignant and unspecified                   | Neoplasms benign, malignant and unspecified (incl cysts and polyps) |
| Small intestine leiomyosarcoma             | Leiomyosarcomas                                                                 | Soft tissue neoplasms malignant and unspecified                        | Neoplasms benign, malignant and unspecified (incl cysts and polyps) |
| Spinal meningioma malignant                | Meningiomas malignant                                                           | Nervous system neoplasms malignant and unspecified NEC                 | Neoplasms benign, malignant and unspecified (incl cysts and polyps) |
| Splenic marginal zone lymphoma recurrent   | Splenic marginal zone lymphomas                                                 | Lymphomas non-Hodgkin's B-cell                                         | Neoplasms benign, malignant and unspecified (incl cysts and polyps) |
| Splenic marginal zone lymphoma refractory  | Splenic marginal zone lymphomas                                                 | Lymphomas non-Hodgkin's B-cell                                         | Neoplasms benign, malignant and unspecified (incl cysts and polyps) |
| Splenic marginal zone lymphoma stage I     | Splenic marginal zone lymphomas                                                 | Lymphomas non-Hodgkin's B-cell                                         | Neoplasms benign, malignant and unspecified (incl cysts and polyps) |
| Splenic marginal zone lymphoma stage II    | Splenic marginal zone lymphomas                                                 | Lymphomas non-Hodgkin's B-cell                                         | Neoplasms benign, malignant and unspecified (incl cysts and polyps) |
| Splenic marginal zone lymphoma stage III   | Splenic marginal zone lymphomas                                                 | Lymphomas non-Hodgkin's B-cell                                         | Neoplasms benign, malignant and unspecified (incl cysts and polyps) |
| Splenic marginal zone lymphoma stage IV    | Splenic marginal zone lymphomas                                                 | Lymphomas non-Hodgkin's B-cell                                         | Neoplasms benign, malignant and unspecified (incl cysts and polyps) |
| Squamous cell carcinoma                    | Neoplasms malignant site unspecified NEC                                        | Miscellaneous and site unspecified neoplasms malignant and unspecified | Neoplasms benign, malignant and unspecified (incl cysts and polyps) |
| Squamous cell carcinoma of lung            | Non-small cell neoplasms malignant of the respiratory tract cell type specified | Respiratory and mediastinal neoplasms malignant and unspecified        | Neoplasms benign, malignant and unspecified (incl cysts and polyps) |
| Squamous cell carcinoma of skin            | Skin neoplasms malignant and unspecified (excl melanoma)                        | Skin neoplasms malignant and unspecified                               | Neoplasms benign, malignant and unspecified (incl cysts and polyps) |
| Squamous cell carcinoma of the cervix      | Cervix neoplasms malignant                                                      | Reproductive neoplasms female malignant and unspecified                | Neoplasms benign, malignant and unspecified (incl cysts and polyps) |
| Squamous cell carcinoma of the hypopharynx | Hypopharyngeal neoplasms malignant and unspecified                              | Respiratory and mediastinal neoplasms malignant and unspecified        | Neoplasms benign, malignant and unspecified (incl cysts and polyps) |

|                                                  |                                            |                                                         |                                                                     |
|--------------------------------------------------|--------------------------------------------|---------------------------------------------------------|---------------------------------------------------------------------|
| Squamous cell carcinoma of the oral cavity       | Lip and oral cavity neoplasms malignant    | Gastrointestinal neoplasms malignant and unspecified    | Neoplasms benign, malignant and unspecified (incl cysts and polyps) |
| Squamous cell carcinoma of the tongue            | Lip and oral cavity neoplasms malignant    | Gastrointestinal neoplasms malignant and unspecified    | Neoplasms benign, malignant and unspecified (incl cysts and polyps) |
| Squamous cell carcinoma of the vagina            | Vaginal neoplasms malignant                | Reproductive neoplasms female malignant and unspecified | Neoplasms benign, malignant and unspecified (incl cysts and polyps) |
| Squamous cell carcinoma of the vulva             | Vulval neoplasms malignant                 | Reproductive neoplasms female malignant and unspecified | Neoplasms benign, malignant and unspecified (incl cysts and polyps) |
| Squamous endometrial carcinoma                   | Endometrial neoplasms malignant            | Reproductive neoplasms female malignant and unspecified | Neoplasms benign, malignant and unspecified (incl cysts and polyps) |
| Superficial spreading melanoma stage I           | Skin melanomas (excl ocular)               | Skin neoplasms malignant and unspecified                | Neoplasms benign, malignant and unspecified (incl cysts and polyps) |
| Superficial spreading melanoma stage II          | Skin melanomas (excl ocular)               | Skin neoplasms malignant and unspecified                | Neoplasms benign, malignant and unspecified (incl cysts and polyps) |
| Superficial spreading melanoma stage III         | Skin melanomas (excl ocular)               | Skin neoplasms malignant and unspecified                | Neoplasms benign, malignant and unspecified (incl cysts and polyps) |
| Superficial spreading melanoma stage IV          | Skin melanomas (excl ocular)               | Skin neoplasms malignant and unspecified                | Neoplasms benign, malignant and unspecified (incl cysts and polyps) |
| Superficial spreading melanoma stage unspecified | Skin melanomas (excl ocular)               | Skin neoplasms malignant and unspecified                | Neoplasms benign, malignant and unspecified (incl cysts and polyps) |
| Synovial sarcoma                                 | Soft tissue sarcomas histology unspecified | Soft tissue neoplasms malignant and unspecified         | Neoplasms benign, malignant and unspecified (incl cysts and polyps) |
| Synovial sarcoma metastatic                      | Soft tissue sarcomas histology unspecified | Soft tissue neoplasms malignant and unspecified         | Neoplasms benign, malignant and unspecified (incl cysts and polyps) |
| Synovial sarcoma recurrent                       | Soft tissue sarcomas histology unspecified | Soft tissue neoplasms malignant and unspecified         | Neoplasms benign, malignant and unspecified (incl cysts and polyps) |
| T-cell chronic lymphocytic leukaemia             | Leukaemias chronic T-cell                  | Leukaemias                                              | Neoplasms benign, malignant and unspecified (incl cysts and polyps) |

|                                           |                                                        |                                                       |                                                                     |
|-------------------------------------------|--------------------------------------------------------|-------------------------------------------------------|---------------------------------------------------------------------|
| T-cell lymphoma                           | Anaplastic large cell lymphomas T- and null-cell types | Lymphomas non-Hodgkin's T-cell                        | Neoplasms benign, malignant and unspecified (incl cysts and polyps) |
| T-cell lymphoma recurrent                 | Anaplastic large cell lymphomas T- and null-cell types | Lymphomas non-Hodgkin's T-cell                        | Neoplasms benign, malignant and unspecified (incl cysts and polyps) |
| T-cell lymphoma refractory                | Anaplastic large cell lymphomas T- and null-cell types | Lymphomas non-Hodgkin's T-cell                        | Neoplasms benign, malignant and unspecified (incl cysts and polyps) |
| T-cell lymphoma stage I                   | Anaplastic large cell lymphomas T- and null-cell types | Lymphomas non-Hodgkin's T-cell                        | Neoplasms benign, malignant and unspecified (incl cysts and polyps) |
| T-cell lymphoma stage II                  | Anaplastic large cell lymphomas T- and null-cell types | Lymphomas non-Hodgkin's T-cell                        | Neoplasms benign, malignant and unspecified (incl cysts and polyps) |
| T-cell lymphoma stage III                 | Anaplastic large cell lymphomas T- and null-cell types | Lymphomas non-Hodgkin's T-cell                        | Neoplasms benign, malignant and unspecified (incl cysts and polyps) |
| T-cell lymphoma stage IV                  | Anaplastic large cell lymphomas T- and null-cell types | Lymphomas non-Hodgkin's T-cell                        | Neoplasms benign, malignant and unspecified (incl cysts and polyps) |
| T-cell prolymphocytic leukaemia           | Leukaemias chronic T-cell                              | Leukaemias                                            | Neoplasms benign, malignant and unspecified (incl cysts and polyps) |
| T-cell type acute leukaemia               | Leukaemias acute lymphocytic                           | Leukaemias                                            | Neoplasms benign, malignant and unspecified (incl cysts and polyps) |
| T-cell unclassifiable lymphoma high grade | T-cell unclassifiable lymphomas                        | Lymphomas non-Hodgkin's T-cell                        | Neoplasms benign, malignant and unspecified (incl cysts and polyps) |
| T-cell unclassifiable lymphoma low grade  | T-cell unclassifiable lymphomas                        | Lymphomas non-Hodgkin's T-cell                        | Neoplasms benign, malignant and unspecified (incl cysts and polyps) |
| Testicular choriocarcinoma stage I        | Testicular neoplasms malignant                         | Reproductive neoplasms male malignant and unspecified | Neoplasms benign, malignant and unspecified (incl cysts and polyps) |
| Testicular choriocarcinoma stage II       | Testicular neoplasms malignant                         | Reproductive neoplasms male malignant and unspecified | Neoplasms benign, malignant and unspecified (incl cysts and polyps) |
| Testicular choriocarcinoma stage III      | Testicular neoplasms malignant                         | Reproductive neoplasms male malignant and unspecified | Neoplasms benign, malignant and unspecified (incl cysts and polyps) |

|                                             |                                |                                                       |                                                                     |
|---------------------------------------------|--------------------------------|-------------------------------------------------------|---------------------------------------------------------------------|
| Testicular embryonal carcinoma stage I      | Testicular neoplasms malignant | Reproductive neoplasms male malignant and unspecified | Neoplasms benign, malignant and unspecified (incl cysts and polyps) |
| Testicular embryonal carcinoma stage II     | Testicular neoplasms malignant | Reproductive neoplasms male malignant and unspecified | Neoplasms benign, malignant and unspecified (incl cysts and polyps) |
| Testicular embryonal carcinoma stage III    | Testicular neoplasms malignant | Reproductive neoplasms male malignant and unspecified | Neoplasms benign, malignant and unspecified (incl cysts and polyps) |
| Testicular germ cell tumour mixed stage I   | Testicular neoplasms malignant | Reproductive neoplasms male malignant and unspecified | Neoplasms benign, malignant and unspecified (incl cysts and polyps) |
| Testicular germ cell tumour mixed stage II  | Testicular neoplasms malignant | Reproductive neoplasms male malignant and unspecified | Neoplasms benign, malignant and unspecified (incl cysts and polyps) |
| Testicular germ cell tumour mixed stage III | Testicular neoplasms malignant | Reproductive neoplasms male malignant and unspecified | Neoplasms benign, malignant and unspecified (incl cysts and polyps) |
| Testicular malignant teratoma stage I       | Testicular neoplasms malignant | Reproductive neoplasms male malignant and unspecified | Neoplasms benign, malignant and unspecified (incl cysts and polyps) |
| Testicular malignant teratoma stage II      | Testicular neoplasms malignant | Reproductive neoplasms male malignant and unspecified | Neoplasms benign, malignant and unspecified (incl cysts and polyps) |
| Testicular malignant teratoma stage III     | Testicular neoplasms malignant | Reproductive neoplasms male malignant and unspecified | Neoplasms benign, malignant and unspecified (incl cysts and polyps) |
| Testicular seminoma (pure) stage I          | Testicular neoplasms malignant | Reproductive neoplasms male malignant and unspecified | Neoplasms benign, malignant and unspecified (incl cysts and polyps) |
| Testicular seminoma (pure) stage II         | Testicular neoplasms malignant | Reproductive neoplasms male malignant and unspecified | Neoplasms benign, malignant and unspecified (incl cysts and polyps) |
| Testicular seminoma (pure) stage III        | Testicular neoplasms malignant | Reproductive neoplasms male malignant and unspecified | Neoplasms benign, malignant and unspecified (incl cysts and polyps) |
| Testicular yolk sac tumour stage I          | Testicular neoplasms malignant | Reproductive neoplasms male malignant and unspecified | Neoplasms benign, malignant and unspecified (incl cysts and polyps) |
| Testicular yolk sac tumour stage II         | Testicular neoplasms malignant | Reproductive neoplasms male malignant and unspecified | Neoplasms benign, malignant and unspecified (incl cysts and polyps) |



|                                                                   |                                                                                 |                                                                 |                                                                     |
|-------------------------------------------------------------------|---------------------------------------------------------------------------------|-----------------------------------------------------------------|---------------------------------------------------------------------|
| Testicular yolk sac tumour stage III                              | Testicular neoplasms malignant                                                  | Reproductive neoplasms male malignant and unspecified           | Neoplasms benign, malignant and unspecified (incl cysts and polyps) |
| Throat cancer                                                     | Respiratory tract and pleural neoplasms malignant cell type unspecified NEC     | Respiratory and mediastinal neoplasms malignant and unspecified | Neoplasms benign, malignant and unspecified (incl cysts and polyps) |
| Thymoma malignant recurrent                                       | Mediastinal neoplasms malignant                                                 | Respiratory and mediastinal neoplasms malignant and unspecified | Neoplasms benign, malignant and unspecified (incl cysts and polyps) |
| Tongue neoplasm malignant stage unspecified                       | Lip and oral cavity neoplasms malignant                                         | Gastrointestinal neoplasms malignant and unspecified            | Neoplasms benign, malignant and unspecified (incl cysts and polyps) |
| Tonsil cancer                                                     | Oropharyngeal, nasopharyngeal and tonsillar neoplasms malignant and unspecified | Respiratory and mediastinal neoplasms malignant and unspecified | Neoplasms benign, malignant and unspecified (incl cysts and polyps) |
| Tracheal cancer                                                   | Respiratory tract and pleural neoplasms malignant cell type unspecified NEC     | Respiratory and mediastinal neoplasms malignant and unspecified | Neoplasms benign, malignant and unspecified (incl cysts and polyps) |
| Transitional cell cancer of renal pelvis and ureter metastatic    | Renal pelvis and ureter neoplasms malignant                                     | Renal and urinary tract neoplasms malignant and unspecified     | Neoplasms benign, malignant and unspecified (incl cysts and polyps) |
| Transitional cell cancer of the renal pelvis and ureter           | Renal pelvis and ureter neoplasms malignant                                     | Renal and urinary tract neoplasms malignant and unspecified     | Neoplasms benign, malignant and unspecified (incl cysts and polyps) |
| Transitional cell cancer of the renal pelvis and ureter localised | Renal pelvis and ureter neoplasms malignant                                     | Renal and urinary tract neoplasms malignant and unspecified     | Neoplasms benign, malignant and unspecified (incl cysts and polyps) |
| Transitional cell cancer of the renal pelvis and ureter recurrent | Renal pelvis and ureter neoplasms malignant                                     | Renal and urinary tract neoplasms malignant and unspecified     | Neoplasms benign, malignant and unspecified (incl cysts and polyps) |
| Transitional cell cancer of the renal pelvis and ureter regional  | Renal pelvis and ureter neoplasms malignant                                     | Renal and urinary tract neoplasms malignant and unspecified     | Neoplasms benign, malignant and unspecified (incl cysts and polyps) |
| Transitional cell carcinoma                                       | Urinary tract neoplasms malignant NEC                                           | Renal and urinary tract neoplasms malignant and unspecified     | Neoplasms benign, malignant and unspecified (incl cysts and polyps) |
| Transitional cell carcinoma urethra                               | Urinary tract neoplasms malignant NEC                                           | Renal and urinary tract neoplasms malignant and unspecified     | Neoplasms benign, malignant and unspecified (incl cysts and polyps) |
| Undifferentiated sarcoma                                          | Soft tissue sarcomas histology unspecified                                      | Soft tissue neoplasms malignant and unspecified                 | Neoplasms benign, malignant and unspecified (incl cysts and polyps) |

|                            |                                             |                                                             |                                                                     |
|----------------------------|---------------------------------------------|-------------------------------------------------------------|---------------------------------------------------------------------|
| Ureteric cancer            | Renal pelvis and ureter neoplasms malignant | Renal and urinary tract neoplasms malignant and unspecified | Neoplasms benign, malignant and unspecified (incl cysts and polyps) |
| Ureteric cancer local      | Renal pelvis and ureter neoplasms malignant | Renal and urinary tract neoplasms malignant and unspecified | Neoplasms benign, malignant and unspecified (incl cysts and polyps) |
| Ureteric cancer metastatic | Renal pelvis and ureter neoplasms malignant | Renal and urinary tract neoplasms malignant and unspecified | Neoplasms benign, malignant and unspecified (incl cysts and polyps) |
| Ureteric cancer recurrent  | Renal pelvis and ureter neoplasms malignant | Renal and urinary tract neoplasms malignant and unspecified | Neoplasms benign, malignant and unspecified (incl cysts and polyps) |
| Ureteric cancer regional   | Renal pelvis and ureter neoplasms malignant | Renal and urinary tract neoplasms malignant and unspecified | Neoplasms benign, malignant and unspecified (incl cysts and polyps) |
| Urethral cancer            | Urinary tract neoplasms malignant NEC       | Renal and urinary tract neoplasms malignant and unspecified | Neoplasms benign, malignant and unspecified (incl cysts and polyps) |
| Urethral cancer metastatic | Urinary tract neoplasms malignant NEC       | Renal and urinary tract neoplasms malignant and unspecified | Neoplasms benign, malignant and unspecified (incl cysts and polyps) |
| Urethral cancer recurrent  | Urinary tract neoplasms malignant NEC       | Renal and urinary tract neoplasms malignant and unspecified | Neoplasms benign, malignant and unspecified (incl cysts and polyps) |
| Uterine cancer             | Uterine neoplasms malignant NEC             | Reproductive neoplasms female malignant and unspecified     | Neoplasms benign, malignant and unspecified (incl cysts and polyps) |
| Uterine carcinoma in situ  | Uterine neoplasms malignant NEC             | Reproductive neoplasms female malignant and unspecified     | Neoplasms benign, malignant and unspecified (incl cysts and polyps) |
| Uterine leiomyosarcoma     | Leiomyosarcomas                             | Soft tissue neoplasms malignant and unspecified             | Neoplasms benign, malignant and unspecified (incl cysts and polyps) |
| Vaginal cancer             | Vaginal neoplasms malignant                 | Reproductive neoplasms female malignant and unspecified     | Neoplasms benign, malignant and unspecified (incl cysts and polyps) |
| Vaginal cancer metastatic  | Vaginal neoplasms malignant                 | Reproductive neoplasms female malignant and unspecified     | Neoplasms benign, malignant and unspecified (incl cysts and polyps) |
| Vaginal cancer recurrent   | Vaginal neoplasms malignant                 | Reproductive neoplasms female malignant and unspecified     | Neoplasms benign, malignant and unspecified (incl cysts and polyps) |

|                          |                             |                                                         |                                                                     |
|--------------------------|-----------------------------|---------------------------------------------------------|---------------------------------------------------------------------|
| Vaginal cancer stage 0   | Vaginal neoplasms malignant | Reproductive neoplasms female malignant and unspecified | Neoplasms benign, malignant and unspecified (incl cysts and polyps) |
| Vaginal cancer stage I   | Vaginal neoplasms malignant | Reproductive neoplasms female malignant and unspecified | Neoplasms benign, malignant and unspecified (incl cysts and polyps) |
| Vaginal cancer stage II  | Vaginal neoplasms malignant | Reproductive neoplasms female malignant and unspecified | Neoplasms benign, malignant and unspecified (incl cysts and polyps) |
| Vaginal cancer stage III | Vaginal neoplasms malignant | Reproductive neoplasms female malignant and unspecified | Neoplasms benign, malignant and unspecified (incl cysts and polyps) |
| Vaginal cancer stage IVA | Vaginal neoplasms malignant | Reproductive neoplasms female malignant and unspecified | Neoplasms benign, malignant and unspecified (incl cysts and polyps) |
| Vaginal cancer stage IVB | Vaginal neoplasms malignant | Reproductive neoplasms female malignant and unspecified | Neoplasms benign, malignant and unspecified (incl cysts and polyps) |
| Vulval cancer            | Vulval neoplasms malignant  | Reproductive neoplasms female malignant and unspecified | Neoplasms benign, malignant and unspecified (incl cysts and polyps) |
| Vulval cancer metastatic | Vulval neoplasms malignant  | Reproductive neoplasms female malignant and unspecified | Neoplasms benign, malignant and unspecified (incl cysts and polyps) |
| Vulval cancer recurrent  | Vulval neoplasms malignant  | Reproductive neoplasms female malignant and unspecified | Neoplasms benign, malignant and unspecified (incl cysts and polyps) |
| Vulval cancer stage 0    | Vulval neoplasms malignant  | Reproductive neoplasms female malignant and unspecified | Neoplasms benign, malignant and unspecified (incl cysts and polyps) |
| Vulval cancer stage I    | Vulval neoplasms malignant  | Reproductive neoplasms female malignant and unspecified | Neoplasms benign, malignant and unspecified (incl cysts and polyps) |
| Vulval cancer stage II   | Vulval neoplasms malignant  | Reproductive neoplasms female malignant and unspecified | Neoplasms benign, malignant and unspecified (incl cysts and polyps) |
| Vulval cancer stage III  | Vulval neoplasms malignant  | Reproductive neoplasms female malignant and unspecified | Neoplasms benign, malignant and unspecified (incl cysts and polyps) |
| Vulval cancer stage IV   | Vulval neoplasms malignant  | Reproductive neoplasms female malignant and unspecified | Neoplasms benign, malignant and unspecified (incl cysts and polyps) |

|                                             |                                            |                                                          |                                                                     |
|---------------------------------------------|--------------------------------------------|----------------------------------------------------------|---------------------------------------------------------------------|
| Waldenstrom's macroglobulinaemia            | Waldenstrom's macroglobulinaemias          | Lymphomas non-Hodgkin's B-cell                           | Neoplasms benign, malignant and unspecified (incl cysts and polyps) |
| Waldenstrom's macroglobulinaemia recurrent  | Waldenstrom's macroglobulinaemias          | Lymphomas non-Hodgkin's B-cell                           | Neoplasms benign, malignant and unspecified (incl cysts and polyps) |
| Waldenstrom's macroglobulinaemia refractory | Waldenstrom's macroglobulinaemias          | Lymphomas non-Hodgkin's B-cell                           | Neoplasms benign, malignant and unspecified (incl cysts and polyps) |
| Waldenstrom's macroglobulinaemia stage I    | Waldenstrom's macroglobulinaemias          | Lymphomas non-Hodgkin's B-cell                           | Neoplasms benign, malignant and unspecified (incl cysts and polyps) |
| Waldenstrom's macroglobulinaemia stage II   | Waldenstrom's macroglobulinaemias          | Lymphomas non-Hodgkin's B-cell                           | Neoplasms benign, malignant and unspecified (incl cysts and polyps) |
| Waldenstrom's macroglobulinaemia stage III  | Waldenstrom's macroglobulinaemias          | Lymphomas non-Hodgkin's B-cell                           | Neoplasms benign, malignant and unspecified (incl cysts and polyps) |
| Waldenstrom's macroglobulinaemia stage IV   | Waldenstrom's macroglobulinaemias          | Lymphomas non-Hodgkin's B-cell                           | Neoplasms benign, malignant and unspecified (incl cysts and polyps) |
| Endometrial stromal sarcoma                 | Endometrial neoplasms malignant            | Reproductive neoplasms female malignant and unspecified  | Neoplasms benign, malignant and unspecified (incl cysts and polyps) |
| Spindle cell sarcoma                        | Soft tissue sarcomas histology unspecified | Soft tissue neoplasms malignant and unspecified          | Neoplasms benign, malignant and unspecified (incl cysts and polyps) |
| Bone marrow tumour cell infiltration        | Haematologic neoplasms NEC                 | Haematopoietic neoplasms (excl leukaemias and lymphomas) | Neoplasms benign, malignant and unspecified (incl cysts and polyps) |
| Bone marrow leukaemic cell infiltration     | Haematologic neoplasms NEC                 | Haematopoietic neoplasms (excl leukaemias and lymphomas) | Neoplasms benign, malignant and unspecified (incl cysts and polyps) |
| Metastases to heart                         | Metastases to specified sites              | Metastases                                               | Neoplasms benign, malignant and unspecified (incl cysts and polyps) |
| Metastases to stomach                       | Metastases to specified sites              | Metastases                                               | Neoplasms benign, malignant and unspecified (incl cysts and polyps) |
| Metastases to pancreas                      | Metastases to specified sites              | Metastases                                               | Neoplasms benign, malignant and unspecified (incl cysts and polyps) |

|                                       |                                                                             |                                                                 |                                                                     |
|---------------------------------------|-----------------------------------------------------------------------------|-----------------------------------------------------------------|---------------------------------------------------------------------|
| Metastases to bladder                 | Metastases to specified sites                                               | Metastases                                                      | Neoplasms benign, malignant and unspecified (incl cysts and polyps) |
| Metastases to thyroid                 | Metastases to specified sites                                               | Metastases                                                      | Neoplasms benign, malignant and unspecified (incl cysts and polyps) |
| Metastases to eye                     | Metastases to specified sites                                               | Metastases                                                      | Neoplasms benign, malignant and unspecified (incl cysts and polyps) |
| Metastases to placenta                | Metastases to specified sites                                               | Metastases                                                      | Neoplasms benign, malignant and unspecified (incl cysts and polyps) |
| Metastases to uterus                  | Metastases to specified sites                                               | Metastases                                                      | Neoplasms benign, malignant and unspecified (incl cysts and polyps) |
| Metastases to fallopian tube          | Metastases to specified sites                                               | Metastases                                                      | Neoplasms benign, malignant and unspecified (incl cysts and polyps) |
| Metastases to pituitary gland         | Metastases to specified sites                                               | Metastases                                                      | Neoplasms benign, malignant and unspecified (incl cysts and polyps) |
| Metastases to muscle                  | Metastases to specified sites                                               | Metastases                                                      | Neoplasms benign, malignant and unspecified (incl cysts and polyps) |
| Neonatal neuroblastoma                | Nervous system neoplasms malignant NEC                                      | Nervous system neoplasms malignant and unspecified NEC          | Neoplasms benign, malignant and unspecified (incl cysts and polyps) |
| Lung cancer metastatic                | Respiratory tract and pleural neoplasms malignant cell type unspecified NEC | Respiratory and mediastinal neoplasms malignant and unspecified | Neoplasms benign, malignant and unspecified (incl cysts and polyps) |
| Renal cancer metastatic               | Renal neoplasms malignant                                                   | Renal and urinary tract neoplasms malignant and unspecified     | Neoplasms benign, malignant and unspecified (incl cysts and polyps) |
| Carcinoid tumour of the duodenum      | Carcinoid tumours                                                           | Endocrine neoplasms malignant and unspecified                   | Neoplasms benign, malignant and unspecified (incl cysts and polyps) |
| Blast crisis in myelogenous leukaemia | Leukaemias myeloid NEC                                                      | Leukaemias                                                      | Neoplasms benign, malignant and unspecified (incl cysts and polyps) |
| Pinealoblastoma                       | Pineal neoplasms                                                            | Nervous system neoplasms malignant and unspecified NEC          | Neoplasms benign, malignant and unspecified (incl cysts and polyps) |

|                                 |                                                |                                                                        |                                                                     |
|---------------------------------|------------------------------------------------|------------------------------------------------------------------------|---------------------------------------------------------------------|
| Metastatic renal cell carcinoma | Renal neoplasms malignant                      | Renal and urinary tract neoplasms malignant and unspecified            | Neoplasms benign, malignant and unspecified (incl cysts and polyps) |
| Myeloblastoma                   | Myeloproliferative disorders (excl leukaemias) | Haematopoietic neoplasms (excl leukaemias and lymphomas)               | Neoplasms benign, malignant and unspecified (incl cysts and polyps) |
| Malignant neoplasm progression  | Neoplasms malignant site unspecified NEC       | Miscellaneous and site unspecified neoplasms malignant and unspecified | Neoplasms benign, malignant and unspecified (incl cysts and polyps) |
| Metastases to bone marrow       | Metastases to specified sites                  | Metastases                                                             | Neoplasms benign, malignant and unspecified (incl cysts and polyps) |
| Metastases to chest wall        | Metastases to specified sites                  | Metastases                                                             | Neoplasms benign, malignant and unspecified (incl cysts and polyps) |
| Metastases to abdominal wall    | Metastases to specified sites                  | Metastases                                                             | Neoplasms benign, malignant and unspecified (incl cysts and polyps) |
| Metastases to diaphragm         | Metastases to specified sites                  | Metastases                                                             | Neoplasms benign, malignant and unspecified (incl cysts and polyps) |
| Metastases to Eustachian tube   | Metastases to specified sites                  | Metastases                                                             | Neoplasms benign, malignant and unspecified (incl cysts and polyps) |
| Metastases to gallbladder       | Metastases to specified sites                  | Metastases                                                             | Neoplasms benign, malignant and unspecified (incl cysts and polyps) |
| Metastases to larynx            | Metastases to specified sites                  | Metastases                                                             | Neoplasms benign, malignant and unspecified (incl cysts and polyps) |
| Metastases to mouth             | Metastases to specified sites                  | Metastases                                                             | Neoplasms benign, malignant and unspecified (incl cysts and polyps) |
| Metastases to nasal sinuses     | Metastases to specified sites                  | Metastases                                                             | Neoplasms benign, malignant and unspecified (incl cysts and polyps) |
| Metastases to oesophagus        | Metastases to specified sites                  | Metastases                                                             | Neoplasms benign, malignant and unspecified (incl cysts and polyps) |
| Metastases to penis             | Metastases to specified sites                  | Metastases                                                             | Neoplasms benign, malignant and unspecified (incl cysts and polyps) |

|                                         |                                            |                                                 |                                                                     |
|-----------------------------------------|--------------------------------------------|-------------------------------------------------|---------------------------------------------------------------------|
| Metastases to perineum                  | Metastases to specified sites              | Metastases                                      | Neoplasms benign, malignant and unspecified (incl cysts and polyps) |
| Metastases to peripheral nervous system | Metastases to specified sites              | Metastases                                      | Neoplasms benign, malignant and unspecified (incl cysts and polyps) |
| Metastases to peritoneum                | Metastases to specified sites              | Metastases                                      | Neoplasms benign, malignant and unspecified (incl cysts and polyps) |
| Metastases to pharynx                   | Metastases to specified sites              | Metastases                                      | Neoplasms benign, malignant and unspecified (incl cysts and polyps) |
| Metastases to prostate                  | Metastases to specified sites              | Metastases                                      | Neoplasms benign, malignant and unspecified (incl cysts and polyps) |
| Metastases to rectum                    | Metastases to specified sites              | Metastases                                      | Neoplasms benign, malignant and unspecified (incl cysts and polyps) |
| Metastases to retroperitoneum           | Metastases to specified sites              | Metastases                                      | Neoplasms benign, malignant and unspecified (incl cysts and polyps) |
| Metastases to salivary gland            | Metastases to specified sites              | Metastases                                      | Neoplasms benign, malignant and unspecified (incl cysts and polyps) |
| Metastases to spleen                    | Metastases to specified sites              | Metastases                                      | Neoplasms benign, malignant and unspecified (incl cysts and polyps) |
| Metastases to testicle                  | Metastases to specified sites              | Metastases                                      | Neoplasms benign, malignant and unspecified (incl cysts and polyps) |
| Metastases to thorax                    | Metastases to specified sites              | Metastases                                      | Neoplasms benign, malignant and unspecified (incl cysts and polyps) |
| Metastases to trachea                   | Metastases to specified sites              | Metastases                                      | Neoplasms benign, malignant and unspecified (incl cysts and polyps) |
| Urinary bladder sarcoma                 | Soft tissue sarcomas histology unspecified | Soft tissue neoplasms malignant and unspecified | Neoplasms benign, malignant and unspecified (incl cysts and polyps) |
| Metastases to meninges                  | Metastases to specified sites              | Metastases                                      | Neoplasms benign, malignant and unspecified (incl cysts and polyps) |

|                                        |                                                                             |                                                                        |                                                                     |
|----------------------------------------|-----------------------------------------------------------------------------|------------------------------------------------------------------------|---------------------------------------------------------------------|
| Lymphoma cutis                         | B-cell lymphomas NEC                                                        | Lymphomas non-Hodgkin's B-cell                                         | Neoplasms benign, malignant and unspecified (incl cysts and polyps) |
| Gastrinoma malignant                   | Islet cell neoplasms and APUDoma NEC                                        | Endocrine neoplasms malignant and unspecified                          | Neoplasms benign, malignant and unspecified (incl cysts and polyps) |
| Phaeochromocytoma malignant            | Islet cell neoplasms and APUDoma NEC                                        | Endocrine neoplasms malignant and unspecified                          | Neoplasms benign, malignant and unspecified (incl cysts and polyps) |
| Pseudosarcoma                          | Neoplasms unspecified malignancy and site unspecified NEC                   | Miscellaneous and site unspecified neoplasms malignant and unspecified | Neoplasms benign, malignant and unspecified (incl cysts and polyps) |
| Intestinal adenocarcinoma              | Gastrointestinal neoplasms malignant NEC                                    | Gastrointestinal neoplasms malignant and unspecified                   | Neoplasms benign, malignant and unspecified (incl cysts and polyps) |
| Peritoneal sarcoma                     | Gastrointestinal neoplasms malignant NEC                                    | Gastrointestinal neoplasms malignant and unspecified                   | Neoplasms benign, malignant and unspecified (incl cysts and polyps) |
| Pleural sarcoma                        | Respiratory tract and pleural neoplasms malignant cell type unspecified NEC | Respiratory and mediastinal neoplasms malignant and unspecified        | Neoplasms benign, malignant and unspecified (incl cysts and polyps) |
| Lymphocytic lymphoma                   | Lymphomas unspecified NEC                                                   | Lymphomas NEC                                                          | Neoplasms benign, malignant and unspecified (incl cysts and polyps) |
| Colorectal cancer metastatic           | Colorectal neoplasms malignant                                              | Gastrointestinal neoplasms malignant and unspecified                   | Neoplasms benign, malignant and unspecified (incl cysts and polyps) |
| Colorectal adenocarcinoma              | Colorectal neoplasms malignant                                              | Gastrointestinal neoplasms malignant and unspecified                   | Neoplasms benign, malignant and unspecified (incl cysts and polyps) |
| Leukaemic infiltration pulmonary       | Leukaemias NEC                                                              | Leukaemias                                                             | Neoplasms benign, malignant and unspecified (incl cysts and polyps) |
| Neuroendocrine tumour                  | Endocrine neoplasms malignant and unspecified NEC                           | Endocrine neoplasms malignant and unspecified                          | Neoplasms benign, malignant and unspecified (incl cysts and polyps) |
| Adenocarcinoma pancreas                | Pancreatic neoplasms malignant (excl islet cell and carcinoid)              | Gastrointestinal neoplasms malignant and unspecified                   | Neoplasms benign, malignant and unspecified (incl cysts and polyps) |
| Ovarian dysgerminoma stage unspecified | Ovarian germ cell neoplasms malignant                                       | Reproductive neoplasms female malignant and unspecified                | Neoplasms benign, malignant and unspecified (incl cysts and polyps) |



|                                     |                                                          |                                                                        |                                                                     |
|-------------------------------------|----------------------------------------------------------|------------------------------------------------------------------------|---------------------------------------------------------------------|
| Carcinoid tumour of the small bowel | Carcinoid tumours                                        | Endocrine neoplasms malignant and unspecified                          | Neoplasms benign, malignant and unspecified (incl cysts and polyps) |
| Malignant nipple neoplasm male      | Breast and nipple neoplasms malignant                    | Breast neoplasms malignant and unspecified (incl nipple)               | Neoplasms benign, malignant and unspecified (incl cysts and polyps) |
| Malignant nipple neoplasm female    | Breast and nipple neoplasms malignant                    | Breast neoplasms malignant and unspecified (incl nipple)               | Neoplasms benign, malignant and unspecified (incl cysts and polyps) |
| Lymphangiosis carcinomatosa         | Metastases to specified sites                            | Metastases                                                             | Neoplasms benign, malignant and unspecified (incl cysts and polyps) |
| Leukaemia cutis                     | Leukaemias NEC                                           | Leukaemias                                                             | Neoplasms benign, malignant and unspecified (incl cysts and polyps) |
| Adenoid cystic carcinoma            | Neoplasms malignant site unspecified NEC                 | Miscellaneous and site unspecified neoplasms malignant and unspecified | Neoplasms benign, malignant and unspecified (incl cysts and polyps) |
| Gastrointestinal cancer metastatic  | Gastrointestinal neoplasms malignant NEC                 | Gastrointestinal neoplasms malignant and unspecified                   | Neoplasms benign, malignant and unspecified (incl cysts and polyps) |
| Immunoblastic lymphoma              | Non-Hodgkin's lymphomas unspecified histology aggressive | Lymphomas non-Hodgkin's unspecified histology                          | Neoplasms benign, malignant and unspecified (incl cysts and polyps) |
| Blast cell crisis                   | Leukaemias acute NEC                                     | Leukaemias                                                             | Neoplasms benign, malignant and unspecified (incl cysts and polyps) |
| Small intestine carcinoma           | Small intestinal neoplasms malignant                     | Gastrointestinal neoplasms malignant and unspecified                   | Neoplasms benign, malignant and unspecified (incl cysts and polyps) |
| Contralateral breast cancer         | Breast and nipple neoplasms malignant                    | Breast neoplasms malignant and unspecified (incl nipple)               | Neoplasms benign, malignant and unspecified (incl cysts and polyps) |
| Cystadenocarcinoma ovary            | Ovarian neoplasms malignant (excl germ cell)             | Reproductive neoplasms female malignant and unspecified                | Neoplasms benign, malignant and unspecified (incl cysts and polyps) |
| Serous cystadenocarcinoma ovary     | Ovarian neoplasms malignant (excl germ cell)             | Reproductive neoplasms female malignant and unspecified                | Neoplasms benign, malignant and unspecified (incl cysts and polyps) |
| Mucinous cystadenocarcinoma ovary   | Ovarian neoplasms malignant (excl germ cell)             | Reproductive neoplasms female malignant and unspecified                | Neoplasms benign, malignant and unspecified (incl cysts and polyps) |

|                                  |                                                                |                                                                        |                                                                     |
|----------------------------------|----------------------------------------------------------------|------------------------------------------------------------------------|---------------------------------------------------------------------|
| Malignant pericardial neoplasm   | Cardiovascular neoplasms malignant and unspecified             | Miscellaneous and site unspecified neoplasms malignant and unspecified | Neoplasms benign, malignant and unspecified (incl cysts and polyps) |
| Disseminated large cell lymphoma | Lymphomas unspecified NEC                                      | Lymphomas NEC                                                          | Neoplasms benign, malignant and unspecified (incl cysts and polyps) |
| Pancreatic sarcoma               | Pancreatic neoplasms malignant (excl islet cell and carcinoid) | Gastrointestinal neoplasms malignant and unspecified                   | Neoplasms benign, malignant and unspecified (incl cysts and polyps) |
| Carcinoid tumour of the pancreas | Carcinoid tumours                                              | Endocrine neoplasms malignant and unspecified                          | Neoplasms benign, malignant and unspecified (incl cysts and polyps) |
| Gastric sarcoma                  | Gastric neoplasms malignant                                    | Gastrointestinal neoplasms malignant and unspecified                   | Neoplasms benign, malignant and unspecified (incl cysts and polyps) |
| Ear neoplasm malignant           | Aural neoplasms malignant and unspecified                      | Miscellaneous and site unspecified neoplasms malignant and unspecified | Neoplasms benign, malignant and unspecified (incl cysts and polyps) |
| Brain cancer metastatic          | Central nervous system neoplasms malignant NEC                 | Nervous system neoplasms malignant and unspecified NEC                 | Neoplasms benign, malignant and unspecified (incl cysts and polyps) |
| Cervix cancer metastatic         | Cervix neoplasms malignant                                     | Reproductive neoplasms female malignant and unspecified                | Neoplasms benign, malignant and unspecified (incl cysts and polyps) |
| Adrenal gland cancer metastatic  | Adrenal neoplasms malignant                                    | Endocrine neoplasms malignant and unspecified                          | Neoplasms benign, malignant and unspecified (incl cysts and polyps) |
| Anal cancer metastatic           | Anal canal neoplasms malignant                                 | Gastrointestinal neoplasms malignant and unspecified                   | Neoplasms benign, malignant and unspecified (incl cysts and polyps) |
| Rectal cancer metastatic         | Colorectal neoplasms malignant                                 | Gastrointestinal neoplasms malignant and unspecified                   | Neoplasms benign, malignant and unspecified (incl cysts and polyps) |
| Oral cavity cancer metastatic    | Lip and oral cavity neoplasms malignant                        | Gastrointestinal neoplasms malignant and unspecified                   | Neoplasms benign, malignant and unspecified (incl cysts and polyps) |
| Ocular cancer metastatic         | Ocular neoplasms malignant (excl melanomas)                    | Ocular neoplasms                                                       | Neoplasms benign, malignant and unspecified (incl cysts and polyps) |
| Otic cancer metastatic           | Aural neoplasms malignant and unspecified                      | Miscellaneous and site unspecified neoplasms malignant and unspecified | Neoplasms benign, malignant and unspecified (incl cysts and polyps) |

|                               |                                                                      |                                                                 |                                                                     |
|-------------------------------|----------------------------------------------------------------------|-----------------------------------------------------------------|---------------------------------------------------------------------|
| Bone cancer metastatic        | Bone neoplasms malignant (excl sarcomas)                             | Skeletal neoplasms malignant and unspecified                    | Neoplasms benign, malignant and unspecified (incl cysts and polyps) |
| Oesophageal cancer metastatic | Oesophageal neoplasms malignant                                      | Gastrointestinal neoplasms malignant and unspecified            | Neoplasms benign, malignant and unspecified (incl cysts and polyps) |
| Testicular cancer metastatic  | Testicular neoplasms malignant                                       | Reproductive neoplasms male malignant and unspecified           | Neoplasms benign, malignant and unspecified (incl cysts and polyps) |
| Pharyngeal cancer metastatic  | Pharyngeal neoplasms malignant and unspecified                       | Respiratory and mediastinal neoplasms malignant and unspecified | Neoplasms benign, malignant and unspecified (incl cysts and polyps) |
| Sinus cancer metastatic       | Paranasal sinus and nasal cavity neoplasms malignant and unspecified | Respiratory and mediastinal neoplasms malignant and unspecified | Neoplasms benign, malignant and unspecified (incl cysts and polyps) |
| Pituitary cancer metastatic   | Endocrine neoplasms malignant and unspecified NEC                    | Endocrine neoplasms malignant and unspecified                   | Neoplasms benign, malignant and unspecified (incl cysts and polyps) |
| Thyroid cancer metastatic     | Thyroid neoplasms malignant                                          | Endocrine neoplasms malignant and unspecified                   | Neoplasms benign, malignant and unspecified (incl cysts and polyps) |
| Thymic cancer metastatic      | Mediastinal neoplasms malignant                                      | Respiratory and mediastinal neoplasms malignant and unspecified | Neoplasms benign, malignant and unspecified (incl cysts and polyps) |
| Tongue cancer metastatic      | Lip and oral cavity neoplasms malignant                              | Gastrointestinal neoplasms malignant and unspecified            | Neoplasms benign, malignant and unspecified (incl cysts and polyps) |
| Hepatic cancer metastatic     | Hepatic neoplasms malignant                                          | Hepatobiliary neoplasms malignant and unspecified               | Neoplasms benign, malignant and unspecified (incl cysts and polyps) |
| Biliary cancer metastatic     | Bile duct neoplasms malignant                                        | Hepatobiliary neoplasms malignant and unspecified               | Neoplasms benign, malignant and unspecified (incl cysts and polyps) |
| Breast cancer metastatic      | Breast and nipple neoplasms malignant                                | Breast neoplasms malignant and unspecified (incl nipple)        | Neoplasms benign, malignant and unspecified (incl cysts and polyps) |
| Colon cancer metastatic       | Colorectal neoplasms malignant                                       | Gastrointestinal neoplasms malignant and unspecified            | Neoplasms benign, malignant and unspecified (incl cysts and polyps) |
| Skin cancer metastatic        | Skin neoplasms malignant and unspecified (excl melanoma)             | Skin neoplasms malignant and unspecified                        | Neoplasms benign, malignant and unspecified (incl cysts and polyps) |

|                                               |                                                      |                                                                        |                                                                     |
|-----------------------------------------------|------------------------------------------------------|------------------------------------------------------------------------|---------------------------------------------------------------------|
| Metastases to urinary tract                   | Metastases to specified sites                        | Metastases                                                             | Neoplasms benign, malignant and unspecified (incl cysts and polyps) |
| Ovarian embryonal carcinoma                   | Ovarian germ cell neoplasms malignant                | Reproductive neoplasms female malignant and unspecified                | Neoplasms benign, malignant and unspecified (incl cysts and polyps) |
| Mastocytic leukaemia                          | Leukaemias NEC                                       | Leukaemias                                                             | Neoplasms benign, malignant and unspecified (incl cysts and polyps) |
| Peritoneal mesothelioma malignant             | Mesotheliomas malignant and unspecified              | Mesotheliomas                                                          | Neoplasms benign, malignant and unspecified (incl cysts and polyps) |
| Melanomatous meningitis                       | Meningiomas malignant                                | Nervous system neoplasms malignant and unspecified NEC                 | Neoplasms benign, malignant and unspecified (incl cysts and polyps) |
| Dermatofibrosarcoma protuberans               | Fibrosarcomas malignant                              | Soft tissue neoplasms malignant and unspecified                        | Neoplasms benign, malignant and unspecified (incl cysts and polyps) |
| Acute megakaryocytic leukaemia (in remission) | Leukaemias acute myeloid                             | Leukaemias                                                             | Neoplasms benign, malignant and unspecified (incl cysts and polyps) |
| Signet-ring cell carcinoma                    | Neoplasms malignant site unspecified NEC             | Miscellaneous and site unspecified neoplasms malignant and unspecified | Neoplasms benign, malignant and unspecified (incl cysts and polyps) |
| Mucoepidermoid carcinoma                      | Neoplasms malignant site unspecified NEC             | Miscellaneous and site unspecified neoplasms malignant and unspecified | Neoplasms benign, malignant and unspecified (incl cysts and polyps) |
| Neuroendocrine carcinoma                      | Endocrine neoplasms malignant and unspecified NEC    | Endocrine neoplasms malignant and unspecified                          | Neoplasms benign, malignant and unspecified (incl cysts and polyps) |
| Malignant neoplasm of auricular cartilage     | Aural neoplasms malignant and unspecified            | Miscellaneous and site unspecified neoplasms malignant and unspecified | Neoplasms benign, malignant and unspecified (incl cysts and polyps) |
| Testicular leiomyosarcoma                     | Leiomyosarcomas                                      | Soft tissue neoplasms malignant and unspecified                        | Neoplasms benign, malignant and unspecified (incl cysts and polyps) |
| Metastatic carcinoma of the bladder           | Bladder neoplasms malignant                          | Renal and urinary tract neoplasms malignant and unspecified            | Neoplasms benign, malignant and unspecified (incl cysts and polyps) |
| Ovarian granulosa-theca cell tumour           | Female reproductive neoplasms unspecified malignancy | Reproductive neoplasms female malignant and unspecified                | Neoplasms benign, malignant and unspecified (incl cysts and polyps) |

|                                            |                                                                     |                                                                        |                                                                     |
|--------------------------------------------|---------------------------------------------------------------------|------------------------------------------------------------------------|---------------------------------------------------------------------|
| Ocular haemangiopericytoma                 | Ocular neoplasms malignancy unspecified                             | Ocular neoplasms                                                       | Neoplasms benign, malignant and unspecified (incl cysts and polyps) |
| Epiglottic carcinoma                       | Laryngeal neoplasms malignant                                       | Respiratory and mediastinal neoplasms malignant and unspecified        | Neoplasms benign, malignant and unspecified (incl cysts and polyps) |
| Ovarian cancer metastatic                  | Ovarian neoplasms malignant (excl germ cell)                        | Reproductive neoplasms female malignant and unspecified                | Neoplasms benign, malignant and unspecified (incl cysts and polyps) |
| Testis cancer                              | Testicular neoplasms malignant                                      | Reproductive neoplasms male malignant and unspecified                  | Neoplasms benign, malignant and unspecified (incl cysts and polyps) |
| Peripheral neuroepithelioma of soft tissue | Soft tissue neoplasms malignant and unspecified NEC (excl sarcomas) | Soft tissue neoplasms malignant and unspecified                        | Neoplasms benign, malignant and unspecified (incl cysts and polyps) |
| Endometrial sarcoma                        | Endometrial neoplasms malignant                                     | Reproductive neoplasms female malignant and unspecified                | Neoplasms benign, malignant and unspecified (incl cysts and polyps) |
| Breast cancer female                       | Breast and nipple neoplasms malignant                               | Breast neoplasms malignant and unspecified (incl nipple)               | Neoplasms benign, malignant and unspecified (incl cysts and polyps) |
| Angiosarcoma non-metastatic                | Cardiovascular neoplasms malignant and unspecified                  | Miscellaneous and site unspecified neoplasms malignant and unspecified | Neoplasms benign, malignant and unspecified (incl cysts and polyps) |
| Pituitary neoplasm malignant recurrent     | Endocrine neoplasms malignant and unspecified NEC                   | Endocrine neoplasms malignant and unspecified                          | Neoplasms benign, malignant and unspecified (incl cysts and polyps) |
| Primitive neuroectodermal tumour           | Nervous system neoplasms malignant NEC                              | Nervous system neoplasms malignant and unspecified NEC                 | Neoplasms benign, malignant and unspecified (incl cysts and polyps) |
| Gallbladder cancer stage II                | Gallbladder neoplasms malignant                                     | Hepatobiliary neoplasms malignant and unspecified                      | Neoplasms benign, malignant and unspecified (incl cysts and polyps) |
| Gallbladder cancer stage III               | Gallbladder neoplasms malignant                                     | Hepatobiliary neoplasms malignant and unspecified                      | Neoplasms benign, malignant and unspecified (incl cysts and polyps) |
| Gallbladder cancer stage IV                | Gallbladder neoplasms malignant                                     | Hepatobiliary neoplasms malignant and unspecified                      | Neoplasms benign, malignant and unspecified (incl cysts and polyps) |
| Gallbladder adenocarcinoma                 | Gallbladder neoplasms malignant                                     | Hepatobiliary neoplasms malignant and unspecified                      | Neoplasms benign, malignant and unspecified (incl cysts and polyps) |

|                                                |                                                                             |                                                                 |                                                                     |
|------------------------------------------------|-----------------------------------------------------------------------------|-----------------------------------------------------------------|---------------------------------------------------------------------|
| Metastatic bronchial carcinoma                 | Respiratory tract and pleural neoplasms malignant cell type unspecified NEC | Respiratory and mediastinal neoplasms malignant and unspecified | Neoplasms benign, malignant and unspecified (incl cysts and polyps) |
| Metastases to peripheral vascular system       | Metastases to specified sites                                               | Metastases                                                      | Neoplasms benign, malignant and unspecified (incl cysts and polyps) |
| Bronchioloalveolar carcinoma                   | Respiratory tract and pleural neoplasms malignant cell type unspecified NEC | Respiratory and mediastinal neoplasms malignant and unspecified | Neoplasms benign, malignant and unspecified (incl cysts and polyps) |
| Tongue carcinoma stage 0                       | Lip and oral cavity neoplasms malignant                                     | Gastrointestinal neoplasms malignant and unspecified            | Neoplasms benign, malignant and unspecified (incl cysts and polyps) |
| Tongue carcinoma stage I                       | Lip and oral cavity neoplasms malignant                                     | Gastrointestinal neoplasms malignant and unspecified            | Neoplasms benign, malignant and unspecified (incl cysts and polyps) |
| Tongue carcinoma stage II                      | Lip and oral cavity neoplasms malignant                                     | Gastrointestinal neoplasms malignant and unspecified            | Neoplasms benign, malignant and unspecified (incl cysts and polyps) |
| Tongue carcinoma stage III                     | Lip and oral cavity neoplasms malignant                                     | Gastrointestinal neoplasms malignant and unspecified            | Neoplasms benign, malignant and unspecified (incl cysts and polyps) |
| Tongue carcinoma stage IV                      | Lip and oral cavity neoplasms malignant                                     | Gastrointestinal neoplasms malignant and unspecified            | Neoplasms benign, malignant and unspecified (incl cysts and polyps) |
| Lung neoplasm malignant                        | Respiratory tract and pleural neoplasms malignant cell type unspecified NEC | Respiratory and mediastinal neoplasms malignant and unspecified | Neoplasms benign, malignant and unspecified (incl cysts and polyps) |
| Oesophageal adenocarcinoma metastatic          | Oesophageal neoplasms malignant                                             | Gastrointestinal neoplasms malignant and unspecified            | Neoplasms benign, malignant and unspecified (incl cysts and polyps) |
| Oesophageal squamous cell carcinoma metastatic | Oesophageal neoplasms malignant                                             | Gastrointestinal neoplasms malignant and unspecified            | Neoplasms benign, malignant and unspecified (incl cysts and polyps) |
| Leukaemic infiltration hepatic                 | Leukaemias NEC                                                              | Leukaemias                                                      | Neoplasms benign, malignant and unspecified (incl cysts and polyps) |
| Chronic lymphocytic leukaemia transformation   | Leukaemias chronic lymphocytic                                              | Leukaemias                                                      | Neoplasms benign, malignant and unspecified (incl cysts and polyps) |
| Richter's syndrome                             | Diffuse large B-cell lymphomas                                              | Lymphomas non-Hodgkin's B-cell                                  | Neoplasms benign, malignant and unspecified (incl cysts and polyps) |

|                                            |                                                                |                                                      |                                                                     |
|--------------------------------------------|----------------------------------------------------------------|------------------------------------------------------|---------------------------------------------------------------------|
| Natural killer-cell lymphoblastic lymphoma | Precursor T-lymphoblastic lymphomas/leukaemias                 | Lymphomas non-Hodgkin's T-cell                       | Neoplasms benign, malignant and unspecified (incl cysts and polyps) |
| Acute myeloid leukaemia recurrent          | Leukaemias acute myeloid                                       | Leukaemias                                           | Neoplasms benign, malignant and unspecified (incl cysts and polyps) |
| Leukaemic retinopathy                      | Leukaemias NEC                                                 | Leukaemias                                           | Neoplasms benign, malignant and unspecified (incl cysts and polyps) |
| Metastases to central nervous system       | Metastases to specified sites                                  | Metastases                                           | Neoplasms benign, malignant and unspecified (incl cysts and polyps) |
| Gallbladder cancer stage 0                 | Gallbladder neoplasms malignant                                | Hepatobiliary neoplasms malignant and unspecified    | Neoplasms benign, malignant and unspecified (incl cysts and polyps) |
| Gallbladder cancer stage I                 | Gallbladder neoplasms malignant                                | Hepatobiliary neoplasms malignant and unspecified    | Neoplasms benign, malignant and unspecified (incl cysts and polyps) |
| Hepatic cancer stage I                     | Hepatic neoplasms malignant                                    | Hepatobiliary neoplasms malignant and unspecified    | Neoplasms benign, malignant and unspecified (incl cysts and polyps) |
| Hepatic cancer stage II                    | Hepatic neoplasms malignant                                    | Hepatobiliary neoplasms malignant and unspecified    | Neoplasms benign, malignant and unspecified (incl cysts and polyps) |
| Pancreatic carcinoma stage 0               | Pancreatic neoplasms malignant (excl islet cell and carcinoid) | Gastrointestinal neoplasms malignant and unspecified | Neoplasms benign, malignant and unspecified (incl cysts and polyps) |
| Pancreatic carcinoma stage I               | Pancreatic neoplasms malignant (excl islet cell and carcinoid) | Gastrointestinal neoplasms malignant and unspecified | Neoplasms benign, malignant and unspecified (incl cysts and polyps) |
| Pancreatic carcinoma stage II              | Pancreatic neoplasms malignant (excl islet cell and carcinoid) | Gastrointestinal neoplasms malignant and unspecified | Neoplasms benign, malignant and unspecified (incl cysts and polyps) |
| Pancreatic carcinoma stage III             | Pancreatic neoplasms malignant (excl islet cell and carcinoid) | Gastrointestinal neoplasms malignant and unspecified | Neoplasms benign, malignant and unspecified (incl cysts and polyps) |
| Hepatic cancer stage III                   | Hepatic neoplasms malignant                                    | Hepatobiliary neoplasms malignant and unspecified    | Neoplasms benign, malignant and unspecified (incl cysts and polyps) |
| Hepatic cancer stage IV                    | Hepatic neoplasms malignant                                    | Hepatobiliary neoplasms malignant and unspecified    | Neoplasms benign, malignant and unspecified (incl cysts and polyps) |

|                                     |                                                                |                                                                        |                                                                     |
|-------------------------------------|----------------------------------------------------------------|------------------------------------------------------------------------|---------------------------------------------------------------------|
| Pancreatic carcinoma stage IV       | Pancreatic neoplasms malignant (excl islet cell and carcinoid) | Gastrointestinal neoplasms malignant and unspecified                   | Neoplasms benign, malignant and unspecified (incl cysts and polyps) |
| Small intestine carcinoma stage 0   | Small intestinal neoplasms malignant                           | Gastrointestinal neoplasms malignant and unspecified                   | Neoplasms benign, malignant and unspecified (incl cysts and polyps) |
| Small intestine carcinoma stage I   | Small intestinal neoplasms malignant                           | Gastrointestinal neoplasms malignant and unspecified                   | Neoplasms benign, malignant and unspecified (incl cysts and polyps) |
| Small intestine carcinoma stage II  | Small intestinal neoplasms malignant                           | Gastrointestinal neoplasms malignant and unspecified                   | Neoplasms benign, malignant and unspecified (incl cysts and polyps) |
| Small intestine carcinoma stage III | Small intestinal neoplasms malignant                           | Gastrointestinal neoplasms malignant and unspecified                   | Neoplasms benign, malignant and unspecified (incl cysts and polyps) |
| Small intestine carcinoma stage IV  | Small intestinal neoplasms malignant                           | Gastrointestinal neoplasms malignant and unspecified                   | Neoplasms benign, malignant and unspecified (incl cysts and polyps) |
| Bile duct cancer stage I            | Bile duct neoplasms malignant                                  | Hepatobiliary neoplasms malignant and unspecified                      | Neoplasms benign, malignant and unspecified (incl cysts and polyps) |
| Bile duct cancer stage II           | Bile duct neoplasms malignant                                  | Hepatobiliary neoplasms malignant and unspecified                      | Neoplasms benign, malignant and unspecified (incl cysts and polyps) |
| Bile duct cancer stage III          | Bile duct neoplasms malignant                                  | Hepatobiliary neoplasms malignant and unspecified                      | Neoplasms benign, malignant and unspecified (incl cysts and polyps) |
| Bile duct cancer stage IV           | Bile duct neoplasms malignant                                  | Hepatobiliary neoplasms malignant and unspecified                      | Neoplasms benign, malignant and unspecified (incl cysts and polyps) |
| Bile duct cancer stage 0            | Bile duct neoplasms malignant                                  | Hepatobiliary neoplasms malignant and unspecified                      | Neoplasms benign, malignant and unspecified (incl cysts and polyps) |
| Buschke-Lowenstein's tumour         | Genitourinary neoplasms malignancy and gender unspecified      | Reproductive and genitourinary neoplasms gender unspecified NEC        | Neoplasms benign, malignant and unspecified (incl cysts and polyps) |
| Stewart-Treves syndrome             | Cardiovascular neoplasms malignant and unspecified             | Miscellaneous and site unspecified neoplasms malignant and unspecified | Neoplasms benign, malignant and unspecified (incl cysts and polyps) |
| Small cell lung cancer metastatic   | Respiratory tract small cell carcinomas                        | Respiratory and mediastinal neoplasms malignant and unspecified        | Neoplasms benign, malignant and unspecified (incl cysts and polyps) |



|                                               |                                                                                 |                                                                        |                                                                     |
|-----------------------------------------------|---------------------------------------------------------------------------------|------------------------------------------------------------------------|---------------------------------------------------------------------|
| Non-small cell lung cancer metastatic         | Non-small cell neoplasms malignant of the respiratory tract cell type specified | Respiratory and mediastinal neoplasms malignant and unspecified        | Neoplasms benign, malignant and unspecified (incl cysts and polyps) |
| Pleural mesothelioma malignant                | Mesotheliomas malignant and unspecified                                         | Mesotheliomas                                                          | Neoplasms benign, malignant and unspecified (incl cysts and polyps) |
| Penile squamous cell carcinoma                | Penile neoplasms malignant                                                      | Reproductive neoplasms male malignant and unspecified                  | Neoplasms benign, malignant and unspecified (incl cysts and polyps) |
| Squamous cell carcinoma of head and neck      | Neoplasms malignant site unspecified NEC                                        | Miscellaneous and site unspecified neoplasms malignant and unspecified | Neoplasms benign, malignant and unspecified (incl cysts and polyps) |
| Plasma cell leukaemia in remission            | Plasma cell myelomas                                                            | Plasma cell neoplasms                                                  | Neoplasms benign, malignant and unspecified (incl cysts and polyps) |
| Prostate cancer                               | Prostatic neoplasms malignant                                                   | Reproductive neoplasms male malignant and unspecified                  | Neoplasms benign, malignant and unspecified (incl cysts and polyps) |
| Precursor B-lymphoblastic lymphoma recurrent  | Precursor B-lymphoblastic lymphomas                                             | Lymphomas non-Hodgkin's B-cell                                         | Neoplasms benign, malignant and unspecified (incl cysts and polyps) |
| Precursor B-lymphoblastic lymphoma refractory | Precursor B-lymphoblastic lymphomas                                             | Lymphomas non-Hodgkin's B-cell                                         | Neoplasms benign, malignant and unspecified (incl cysts and polyps) |
| Acute leukaemia in remission                  | Leukaemias acute NEC                                                            | Leukaemias                                                             | Neoplasms benign, malignant and unspecified (incl cysts and polyps) |
| Astrocytoma malignant                         | Glial tumours malignant                                                         | Nervous system neoplasms malignant and unspecified NEC                 | Neoplasms benign, malignant and unspecified (incl cysts and polyps) |
| Breast cancer male                            | Breast and nipple neoplasms malignant                                           | Breast neoplasms malignant and unspecified (incl nipple)               | Neoplasms benign, malignant and unspecified (incl cysts and polyps) |
| Cardiac neoplasm malignant                    | Cardiovascular neoplasms malignant and unspecified                              | Miscellaneous and site unspecified neoplasms malignant and unspecified | Neoplasms benign, malignant and unspecified (incl cysts and polyps) |
| Thymoma malignant                             | Mediastinal neoplasms malignant                                                 | Respiratory and mediastinal neoplasms malignant and unspecified        | Neoplasms benign, malignant and unspecified (incl cysts and polyps) |
| Chronic leukaemia in remission                | Leukaemias chronic NEC                                                          | Leukaemias                                                             | Neoplasms benign, malignant and unspecified (incl cysts and polyps) |

|                                                       |                                                        |                                                                        |                                                                     |
|-------------------------------------------------------|--------------------------------------------------------|------------------------------------------------------------------------|---------------------------------------------------------------------|
| Endocrine neoplasm malignant                          | Endocrine neoplasms malignant and unspecified NEC      | Endocrine neoplasms malignant and unspecified                          | Neoplasms benign, malignant and unspecified (incl cysts and polyps) |
| Female reproductive tract carcinoma in situ           | Female reproductive neoplasms malignant NEC            | Reproductive neoplasms female malignant and unspecified                | Neoplasms benign, malignant and unspecified (incl cysts and polyps) |
| Gastrointestinal carcinoma in situ                    | Gastrointestinal neoplasms malignant NEC               | Gastrointestinal neoplasms malignant and unspecified                   | Neoplasms benign, malignant and unspecified (incl cysts and polyps) |
| Follicle centre lymphoma, follicular grade I, II, III | Follicle centre lymphomas, follicular grade I, II, III | Lymphomas non-Hodgkin's B-cell                                         | Neoplasms benign, malignant and unspecified (incl cysts and polyps) |
| Germ cell cancer                                      | Germ cell neoplasms site unspecified NEC               | Miscellaneous and site unspecified neoplasms malignant and unspecified | Neoplasms benign, malignant and unspecified (incl cysts and polyps) |
| Leukaemia in remission                                | Leukaemias NEC                                         | Leukaemias                                                             | Neoplasms benign, malignant and unspecified (incl cysts and polyps) |
| Malignant anorectal neoplasm                          | Colorectal neoplasms malignant                         | Gastrointestinal neoplasms malignant and unspecified                   | Neoplasms benign, malignant and unspecified (incl cysts and polyps) |
| Malignant cranial nerve neoplasm                      | Central nervous system neoplasms malignant NEC         | Nervous system neoplasms malignant and unspecified NEC                 | Neoplasms benign, malignant and unspecified (incl cysts and polyps) |
| Malignant lymphoid neoplasm                           | Lymphomas unspecified NEC                              | Lymphomas NEC                                                          | Neoplasms benign, malignant and unspecified (incl cysts and polyps) |
| Malignant mediastinal neoplasm                        | Mediastinal neoplasms malignant                        | Respiratory and mediastinal neoplasms malignant and unspecified        | Neoplasms benign, malignant and unspecified (incl cysts and polyps) |
| Intraocular melanoma                                  | Ocular melanomas                                       | Ocular neoplasms                                                       | Neoplasms benign, malignant and unspecified (incl cysts and polyps) |
| Malignant middle ear neoplasm                         | Aural neoplasms malignant and unspecified              | Miscellaneous and site unspecified neoplasms malignant and unspecified | Neoplasms benign, malignant and unspecified (incl cysts and polyps) |
| Malignant nervous system neoplasm                     | Nervous system neoplasms malignant NEC                 | Nervous system neoplasms malignant and unspecified NEC                 | Neoplasms benign, malignant and unspecified (incl cysts and polyps) |
| Malignant peritoneal neoplasm                         | Gastrointestinal neoplasms malignant NEC               | Gastrointestinal neoplasms malignant and unspecified                   | Neoplasms benign, malignant and unspecified (incl cysts and polyps) |

|                                      |                                                                                 |                                                                        |                                                                     |
|--------------------------------------|---------------------------------------------------------------------------------|------------------------------------------------------------------------|---------------------------------------------------------------------|
| Malignant respiratory tract neoplasm | Respiratory tract and pleural neoplasms malignant cell type unspecified NEC     | Respiratory and mediastinal neoplasms malignant and unspecified        | Neoplasms benign, malignant and unspecified (incl cysts and polyps) |
| Malignant urinary tract neoplasm     | Urinary tract neoplasms malignant NEC                                           | Renal and urinary tract neoplasms malignant and unspecified            | Neoplasms benign, malignant and unspecified (incl cysts and polyps) |
| Mantle cell lymphoma                 | Mantle cell lymphomas                                                           | Lymphomas non-Hodgkin's B-cell                                         | Neoplasms benign, malignant and unspecified (incl cysts and polyps) |
| Metastases to nervous system         | Metastases to specified sites                                                   | Metastases                                                             | Neoplasms benign, malignant and unspecified (incl cysts and polyps) |
| Metastases to reproductive organ     | Metastases to specified sites                                                   | Metastases                                                             | Neoplasms benign, malignant and unspecified (incl cysts and polyps) |
| Metastatic neoplasm                  | Neoplasms malignant site unspecified NEC                                        | Miscellaneous and site unspecified neoplasms malignant and unspecified | Neoplasms benign, malignant and unspecified (incl cysts and polyps) |
| Monocytic leukaemia in remission     | Leukaemias myeloid NEC                                                          | Leukaemias                                                             | Neoplasms benign, malignant and unspecified (incl cysts and polyps) |
| Myeloid leukaemia in remission       | Leukaemias myeloid NEC                                                          | Leukaemias                                                             | Neoplasms benign, malignant and unspecified (incl cysts and polyps) |
| Nasopharyngeal cancer                | Oropharyngeal, nasopharyngeal and tonsillar neoplasms malignant and unspecified | Respiratory and mediastinal neoplasms malignant and unspecified        | Neoplasms benign, malignant and unspecified (incl cysts and polyps) |
| Ovarian epithelial cancer            | Ovarian neoplasms malignant (excl germ cell)                                    | Reproductive neoplasms female malignant and unspecified                | Neoplasms benign, malignant and unspecified (incl cysts and polyps) |
| Peripheral neuroepithelioma of bone  | Bone sarcomas                                                                   | Skeletal neoplasms malignant and unspecified                           | Neoplasms benign, malignant and unspecified (incl cysts and polyps) |
| Testicular germ cell cancer          | Testicular neoplasms malignant                                                  | Reproductive neoplasms male malignant and unspecified                  | Neoplasms benign, malignant and unspecified (incl cysts and polyps) |
| Urinary tract carcinoma in situ      | Urinary tract neoplasms malignant NEC                                           | Renal and urinary tract neoplasms malignant and unspecified            | Neoplasms benign, malignant and unspecified (incl cysts and polyps) |
| Anal cancer                          | Anal canal neoplasms malignant                                                  | Gastrointestinal neoplasms malignant and unspecified                   | Neoplasms benign, malignant and unspecified (incl cysts and polyps) |

|                                                      |                                                              |                                                                        |                                                                     |
|------------------------------------------------------|--------------------------------------------------------------|------------------------------------------------------------------------|---------------------------------------------------------------------|
| Carcinoma in situ                                    | Neoplasms malignant site unspecified NEC                     | Miscellaneous and site unspecified neoplasms malignant and unspecified | Neoplasms benign, malignant and unspecified (incl cysts and polyps) |
| Colorectal cancer                                    | Colorectal neoplasms malignant                               | Gastrointestinal neoplasms malignant and unspecified                   | Neoplasms benign, malignant and unspecified (incl cysts and polyps) |
| Lip and/or oral cavity cancer                        | Lip and oral cavity neoplasms malignant                      | Gastrointestinal neoplasms malignant and unspecified                   | Neoplasms benign, malignant and unspecified (incl cysts and polyps) |
| Malignant mesenchymoma                               | Mesenchymomas malignant                                      | Soft tissue neoplasms malignant and unspecified                        | Neoplasms benign, malignant and unspecified (incl cysts and polyps) |
| Neurofibrosarcoma                                    | Neurofibrosarcomas                                           | Soft tissue neoplasms malignant and unspecified                        | Neoplasms benign, malignant and unspecified (incl cysts and polyps) |
| Oesophageal squamous cell carcinoma                  | Oesophageal neoplasms malignant                              | Gastrointestinal neoplasms malignant and unspecified                   | Neoplasms benign, malignant and unspecified (incl cysts and polyps) |
| Pineal parenchymal neoplasm malignant                | Pineal neoplasms                                             | Nervous system neoplasms malignant and unspecified NEC                 | Neoplasms benign, malignant and unspecified (incl cysts and polyps) |
| Hodgkin's disease stage IV                           | Hodgkin's disease NEC                                        | Lymphomas Hodgkin's disease                                            | Neoplasms benign, malignant and unspecified (incl cysts and polyps) |
| Metastases to the respiratory system                 | Metastases to specified sites                                | Metastases                                                             | Neoplasms benign, malignant and unspecified (incl cysts and polyps) |
| Cervix carcinoma stage 0                             | Cervix neoplasms malignant                                   | Reproductive neoplasms female malignant and unspecified                | Neoplasms benign, malignant and unspecified (incl cysts and polyps) |
| Extragenadal primary malignant teratoma              | Extragenadal primary germ cell neoplasms                     | Miscellaneous and site unspecified neoplasms malignant and unspecified | Neoplasms benign, malignant and unspecified (incl cysts and polyps) |
| Extragenadal primary non-seminoma                    | Extragenadal primary germ cell neoplasms                     | Miscellaneous and site unspecified neoplasms malignant and unspecified | Neoplasms benign, malignant and unspecified (incl cysts and polyps) |
| Extranodal marginal zone B-cell lymphoma (MALT type) | Extranodal marginal zone B-cell lymphomas (low grade B-cell) | Lymphomas non-Hodgkin's B-cell                                         | Neoplasms benign, malignant and unspecified (incl cysts and polyps) |
| Non-Hodgkin's lymphoma transformed recurrent         | Non-Hodgkin's lymphomas transformed recurrent                | Lymphomas non-Hodgkin's unspecified histology                          | Neoplasms benign, malignant and unspecified (incl cysts and polyps) |

|                                                      |                                                                                 |                                                                        |                                                                     |
|------------------------------------------------------|---------------------------------------------------------------------------------|------------------------------------------------------------------------|---------------------------------------------------------------------|
| Non-renal cell carcinoma of kidney                   | Renal neoplasms malignant                                                       | Renal and urinary tract neoplasms malignant and unspecified            | Neoplasms benign, malignant and unspecified (incl cysts and polyps) |
| Non-small cell lung cancer                           | Non-small cell neoplasms malignant of the respiratory tract cell type specified | Respiratory and mediastinal neoplasms malignant and unspecified        | Neoplasms benign, malignant and unspecified (incl cysts and polyps) |
| Ovarian germ cell cancer                             | Ovarian germ cell neoplasms malignant                                           | Reproductive neoplasms female malignant and unspecified                | Neoplasms benign, malignant and unspecified (incl cysts and polyps) |
| Ovarian germ cell cancer stage I                     | Ovarian germ cell neoplasms malignant                                           | Reproductive neoplasms female malignant and unspecified                | Neoplasms benign, malignant and unspecified (incl cysts and polyps) |
| Ovarian germ cell cancer stage II                    | Ovarian germ cell neoplasms malignant                                           | Reproductive neoplasms female malignant and unspecified                | Neoplasms benign, malignant and unspecified (incl cysts and polyps) |
| Ovarian germ cell cancer stage III                   | Ovarian germ cell neoplasms malignant                                           | Reproductive neoplasms female malignant and unspecified                | Neoplasms benign, malignant and unspecified (incl cysts and polyps) |
| Ovarian germ cell cancer stage IV                    | Ovarian germ cell neoplasms malignant                                           | Reproductive neoplasms female malignant and unspecified                | Neoplasms benign, malignant and unspecified (incl cysts and polyps) |
| Paranasal sinus and nasal cavity malignant neoplasm  | Paranasal sinus and nasal cavity neoplasms malignant and unspecified            | Respiratory and mediastinal neoplasms malignant and unspecified        | Neoplasms benign, malignant and unspecified (incl cysts and polyps) |
| Salivary gland cancer                                | Salivary gland neoplasms malignant                                              | Gastrointestinal neoplasms malignant and unspecified                   | Neoplasms benign, malignant and unspecified (incl cysts and polyps) |
| Follicle centre lymphoma diffuse small cell lymphoma | Follicle centre lymphomas diffuse predominantly small cell                      | Lymphomas non-Hodgkin's B-cell                                         | Neoplasms benign, malignant and unspecified (incl cysts and polyps) |
| Gastric cancer stage IV                              | Gastric neoplasms malignant                                                     | Gastrointestinal neoplasms malignant and unspecified                   | Neoplasms benign, malignant and unspecified (incl cysts and polyps) |
| Gestational trophoblastic tumour                     | Germ cell neoplasms site unspecified NEC                                        | Miscellaneous and site unspecified neoplasms malignant and unspecified | Neoplasms benign, malignant and unspecified (incl cysts and polyps) |
| Hepatoblastoma                                       | Hepatoblastomas                                                                 | Hepatobiliary neoplasms malignant and unspecified                      | Neoplasms benign, malignant and unspecified (incl cysts and polyps) |
| Lung infiltration malignant                          | Respiratory tract and pleural neoplasms malignant cell type unspecified NEC     | Respiratory and mediastinal neoplasms malignant and unspecified        | Neoplasms benign, malignant and unspecified (incl cysts and polyps) |

|                                      |                                                       |                                                          |                                                                     |
|--------------------------------------|-------------------------------------------------------|----------------------------------------------------------|---------------------------------------------------------------------|
| Malignant muscle neoplasm            | Soft tissue sarcomas histology unspecified            | Soft tissue neoplasms malignant and unspecified          | Neoplasms benign, malignant and unspecified (incl cysts and polyps) |
| Malignant nipple neoplasm            | Breast and nipple neoplasms malignant                 | Breast neoplasms malignant and unspecified (incl nipple) | Neoplasms benign, malignant and unspecified (incl cysts and polyps) |
| Splenic marginal zone lymphoma       | Splenic marginal zone lymphomas                       | Lymphomas non-Hodgkin's B-cell                           | Neoplasms benign, malignant and unspecified (incl cysts and polyps) |
| Testicular choriocarcinoma           | Testicular neoplasms malignant                        | Reproductive neoplasms male malignant and unspecified    | Neoplasms benign, malignant and unspecified (incl cysts and polyps) |
| Testicular embryonal carcinoma       | Testicular neoplasms malignant                        | Reproductive neoplasms male malignant and unspecified    | Neoplasms benign, malignant and unspecified (incl cysts and polyps) |
| Testicular seminoma (pure)           | Testicular neoplasms malignant                        | Reproductive neoplasms male malignant and unspecified    | Neoplasms benign, malignant and unspecified (incl cysts and polyps) |
| Metastasis                           | Metastases to unknown and unspecified sites           | Metastases                                               | Neoplasms benign, malignant and unspecified (incl cysts and polyps) |
| Metastases to biliary tract          | Metastases to specified sites                         | Metastases                                               | Neoplasms benign, malignant and unspecified (incl cysts and polyps) |
| Metastases to gastrointestinal tract | Metastases to specified sites                         | Metastases                                               | Neoplasms benign, malignant and unspecified (incl cysts and polyps) |
| Metastases to soft tissue            | Metastases to specified sites                         | Metastases                                               | Neoplasms benign, malignant and unspecified (incl cysts and polyps) |
| Retroperitoneal neoplasm metastatic  | Gastrointestinal neoplasms malignancy unspecified NEC | Gastrointestinal neoplasms malignant and unspecified     | Neoplasms benign, malignant and unspecified (incl cysts and polyps) |
| Leukaemia recurrent                  | Leukaemias NEC                                        | Leukaemias                                               | Neoplasms benign, malignant and unspecified (incl cysts and polyps) |
| Gastroesophageal cancer              | Gastric neoplasms malignant                           | Gastrointestinal neoplasms malignant and unspecified     | Neoplasms benign, malignant and unspecified (incl cysts and polyps) |
| Hormone-refractory prostate cancer   | Prostatic neoplasms malignant                         | Reproductive neoplasms male malignant and unspecified    | Neoplasms benign, malignant and unspecified (incl cysts and polyps) |

|                                                         |                                                                                 |                                                                        |                                                                     |
|---------------------------------------------------------|---------------------------------------------------------------------------------|------------------------------------------------------------------------|---------------------------------------------------------------------|
| Metastatic glioma                                       | Glial tumours malignant                                                         | Nervous system neoplasms malignant and unspecified NEC                 | Neoplasms benign, malignant and unspecified (incl cysts and polyps) |
| Colon cancer stage 0                                    | Colorectal neoplasms malignant                                                  | Gastrointestinal neoplasms malignant and unspecified                   | Neoplasms benign, malignant and unspecified (incl cysts and polyps) |
| Vulvar adenocarcinoma                                   | Vulval neoplasms malignant                                                      | Reproductive neoplasms female malignant and unspecified                | Neoplasms benign, malignant and unspecified (incl cysts and polyps) |
| Metastatic squamous cell carcinoma                      | Neoplasms malignant site unspecified NEC                                        | Miscellaneous and site unspecified neoplasms malignant and unspecified | Neoplasms benign, malignant and unspecified (incl cysts and polyps) |
| Porocarcinoma                                           | Skin neoplasms malignant and unspecified (excl melanoma)                        | Skin neoplasms malignant and unspecified                               | Neoplasms benign, malignant and unspecified (incl cysts and polyps) |
| Acute lymphocytic leukaemia recurrent                   | Leukaemias acute lymphocytic                                                    | Leukaemias                                                             | Neoplasms benign, malignant and unspecified (incl cysts and polyps) |
| Malignant neoplasm of eyelid                            | Ocular neoplasms malignant (excl melanomas)                                     | Ocular neoplasms                                                       | Neoplasms benign, malignant and unspecified (incl cysts and polyps) |
| Malignant melanoma of eyelid                            | Ocular melanomas                                                                | Ocular neoplasms                                                       | Neoplasms benign, malignant and unspecified (incl cysts and polyps) |
| Non-Hodgkin's lymphoma unspecified histology aggressive | Non-Hodgkin's lymphomas unspecified histology aggressive                        | Lymphomas non-Hodgkin's unspecified histology                          | Neoplasms benign, malignant and unspecified (incl cysts and polyps) |
| Metastatic gastric cancer                               | Gastric neoplasms malignant                                                     | Gastrointestinal neoplasms malignant and unspecified                   | Neoplasms benign, malignant and unspecified (incl cysts and polyps) |
| Lung adenocarcinoma metastatic                          | Non-small cell neoplasms malignant of the respiratory tract cell type specified | Respiratory and mediastinal neoplasms malignant and unspecified        | Neoplasms benign, malignant and unspecified (incl cysts and polyps) |
| Lip squamous cell carcinoma                             | Lip and oral cavity neoplasms malignant                                         | Gastrointestinal neoplasms malignant and unspecified                   | Neoplasms benign, malignant and unspecified (incl cysts and polyps) |
| Oropharyngeal cancer stage IV                           | Oropharyngeal, nasopharyngeal and tonsillar neoplasms malignant and unspecified | Respiratory and mediastinal neoplasms malignant and unspecified        | Neoplasms benign, malignant and unspecified (incl cysts and polyps) |
| Lymphoma transformation                                 | Lymphomas unspecified NEC                                                       | Lymphomas NEC                                                          | Neoplasms benign, malignant and unspecified (incl cysts and polyps) |

|                                                       |                                                        |                                                                        |                                                                     |
|-------------------------------------------------------|--------------------------------------------------------|------------------------------------------------------------------------|---------------------------------------------------------------------|
| Desmoplastic small round cell tumour                  | Gastrointestinal neoplasms malignant NEC               | Gastrointestinal neoplasms malignant and unspecified                   | Neoplasms benign, malignant and unspecified (incl cysts and polyps) |
| Malignant transformation                              | Neoplasms malignant site unspecified NEC               | Miscellaneous and site unspecified neoplasms malignant and unspecified | Neoplasms benign, malignant and unspecified (incl cysts and polyps) |
| Plasmablastic lymphoma                                | Non-Hodgkin's lymphomas NEC                            | Lymphomas non-Hodgkin's unspecified histology                          | Neoplasms benign, malignant and unspecified (incl cysts and polyps) |
| Cancer in remission                                   | Neoplasms malignant site unspecified NEC               | Miscellaneous and site unspecified neoplasms malignant and unspecified | Neoplasms benign, malignant and unspecified (incl cysts and polyps) |
| Vaginal adenocarcinoma                                | Vaginal neoplasms malignant                            | Reproductive neoplasms female malignant and unspecified                | Neoplasms benign, malignant and unspecified (incl cysts and polyps) |
| HER-2 positive breast cancer                          | Breast and nipple neoplasms malignant                  | Breast neoplasms malignant and unspecified (incl nipple)               | Neoplasms benign, malignant and unspecified (incl cysts and polyps) |
| Malignant glioma                                      | Glial tumours malignant                                | Nervous system neoplasms malignant and unspecified NEC                 | Neoplasms benign, malignant and unspecified (incl cysts and polyps) |
| CNS germinoma                                         | Central nervous system neoplasms malignant NEC         | Nervous system neoplasms malignant and unspecified NEC                 | Neoplasms benign, malignant and unspecified (incl cysts and polyps) |
| Chronic eosinophilic leukaemia                        | Leukaemias chronic myeloid                             | Leukaemias                                                             | Neoplasms benign, malignant and unspecified (incl cysts and polyps) |
| Non-Hodgkin's lymphoma unspecified histology indolent | Non-Hodgkin's lymphomas unspecified histology indolent | Lymphomas non-Hodgkin's unspecified histology                          | Neoplasms benign, malignant and unspecified (incl cysts and polyps) |
| Primary effusion lymphoma                             | B-cell lymphomas NEC                                   | Lymphomas non-Hodgkin's B-cell                                         | Neoplasms benign, malignant and unspecified (incl cysts and polyps) |
| Ovarian stromal cancer                                | Ovarian neoplasms malignant (excl germ cell)           | Reproductive neoplasms female malignant and unspecified                | Neoplasms benign, malignant and unspecified (incl cysts and polyps) |
| Congenital fibrosarcoma                               | Musculoskeletal disorders congenital NEC               | Musculoskeletal and connective tissue disorders congenital             | Congenital, familial and genetic disorders                          |
| Alveolar rhabdomyosarcoma                             | Rhabdomyosarcomas                                      | Soft tissue neoplasms malignant and unspecified                        | Neoplasms benign, malignant and unspecified (incl cysts and polyps) |



|                                              |                                                |                                                                 |                                                                     |
|----------------------------------------------|------------------------------------------------|-----------------------------------------------------------------|---------------------------------------------------------------------|
| Embryonal rhabdomyosarcoma                   | Rhabdomyosarcomas                              | Soft tissue neoplasms malignant and unspecified                 | Neoplasms benign, malignant and unspecified (incl cysts and polyps) |
| Nongerminomatous germ cell tumour of the CNS | Central nervous system neoplasms malignant NEC | Nervous system neoplasms malignant and unspecified NEC          | Neoplasms benign, malignant and unspecified (incl cysts and polyps) |
| Atypical teratoid/rhabdoid tumour of CNS     | Central nervous system neoplasms malignant NEC | Nervous system neoplasms malignant and unspecified NEC          | Neoplasms benign, malignant and unspecified (incl cysts and polyps) |
| Huertle cell carcinoma                       | Thyroid neoplasms malignant                    | Endocrine neoplasms malignant and unspecified                   | Neoplasms benign, malignant and unspecified (incl cysts and polyps) |
| Apocrine breast carcinoma                    | Breast and nipple neoplasms malignant          | Breast neoplasms malignant and unspecified (incl nipple)        | Neoplasms benign, malignant and unspecified (incl cysts and polyps) |
| Gliomatosis cerebri                          | Glial tumours malignant                        | Nervous system neoplasms malignant and unspecified NEC          | Neoplasms benign, malignant and unspecified (incl cysts and polyps) |
| Conjunctival melanoma                        | Ocular melanomas                               | Ocular neoplasms                                                | Neoplasms benign, malignant and unspecified (incl cysts and polyps) |
| Squamous cell carcinoma of pharynx           | Pharyngeal neoplasms malignant and unspecified | Respiratory and mediastinal neoplasms malignant and unspecified | Neoplasms benign, malignant and unspecified (incl cysts and polyps) |
| Thyroid cancer                               | Thyroid neoplasms malignant                    | Endocrine neoplasms malignant and unspecified                   | Neoplasms benign, malignant and unspecified (incl cysts and polyps) |
| Haematological malignancy                    | Haematologic neoplasms NEC                     | Haematopoietic neoplasms (excl leukaemias and lymphomas)        | Neoplasms benign, malignant and unspecified (incl cysts and polyps) |
| Medulloblastoma recurrent                    | Glial tumours malignant                        | Nervous system neoplasms malignant and unspecified NEC          | Neoplasms benign, malignant and unspecified (incl cysts and polyps) |
| Neuroblastoma recurrent                      | Nervous system neoplasms malignant NEC         | Nervous system neoplasms malignant and unspecified NEC          | Neoplasms benign, malignant and unspecified (incl cysts and polyps) |
| Melanoma recurrent                           | Skin melanomas (excl ocular)                   | Skin neoplasms malignant and unspecified                        | Neoplasms benign, malignant and unspecified (incl cysts and polyps) |
| Ovarian cancer recurrent                     | Ovarian neoplasms malignant (excl germ cell)   | Reproductive neoplasms female malignant and unspecified         | Neoplasms benign, malignant and unspecified (incl cysts and polyps) |

|                                               |                                    |                                                             |                                                                     |
|-----------------------------------------------|------------------------------------|-------------------------------------------------------------|---------------------------------------------------------------------|
| Bladder transitional cell carcinoma stage 0   | Bladder neoplasms malignant        | Renal and urinary tract neoplasms malignant and unspecified | Neoplasms benign, malignant and unspecified (incl cysts and polyps) |
| Bladder transitional cell carcinoma recurrent | Bladder neoplasms malignant        | Renal and urinary tract neoplasms malignant and unspecified | Neoplasms benign, malignant and unspecified (incl cysts and polyps) |
| Bladder transitional cell carcinoma stage I   | Bladder neoplasms malignant        | Renal and urinary tract neoplasms malignant and unspecified | Neoplasms benign, malignant and unspecified (incl cysts and polyps) |
| Bladder transitional cell carcinoma stage IV  | Bladder neoplasms malignant        | Renal and urinary tract neoplasms malignant and unspecified | Neoplasms benign, malignant and unspecified (incl cysts and polyps) |
| Bladder transitional cell carcinoma stage II  | Bladder neoplasms malignant        | Renal and urinary tract neoplasms malignant and unspecified | Neoplasms benign, malignant and unspecified (incl cysts and polyps) |
| Bladder transitional cell carcinoma stage III | Bladder neoplasms malignant        | Renal and urinary tract neoplasms malignant and unspecified | Neoplasms benign, malignant and unspecified (incl cysts and polyps) |
| Gallbladder cancer metastatic                 | Gallbladder neoplasms malignant    | Hepatobiliary neoplasms malignant and unspecified           | Neoplasms benign, malignant and unspecified (incl cysts and polyps) |
| Metastatic salivary gland cancer              | Salivary gland neoplasms malignant | Gastrointestinal neoplasms malignant and unspecified        | Neoplasms benign, malignant and unspecified (incl cysts and polyps) |
| HER-2 positive gastric cancer                 | Gastric neoplasms malignant        | Gastrointestinal neoplasms malignant and unspecified        | Neoplasms benign, malignant and unspecified (incl cysts and polyps) |
| Myxofibrosarcoma                              | Fibrous histiocytomas malignant    | Soft tissue neoplasms malignant and unspecified             | Neoplasms benign, malignant and unspecified (incl cysts and polyps) |
| Hepatosplenic T-cell lymphoma                 | Adult T-cell lymphomas/leukaemias  | Lymphomas non-Hodgkin's T-cell                              | Neoplasms benign, malignant and unspecified (incl cysts and polyps) |
| Endometrial sarcoma recurrent                 | Endometrial neoplasms malignant    | Reproductive neoplasms female malignant and unspecified     | Neoplasms benign, malignant and unspecified (incl cysts and polyps) |
| Endometrial sarcoma metastatic                | Endometrial neoplasms malignant    | Reproductive neoplasms female malignant and unspecified     | Neoplasms benign, malignant and unspecified (incl cysts and polyps) |
| Leukaemic infiltration extramedullary         | Leukaemias NEC                     | Leukaemias                                                  | Neoplasms benign, malignant and unspecified (incl cysts and polyps) |

|                                                |                                                                     |                                                                        |                                                                     |
|------------------------------------------------|---------------------------------------------------------------------|------------------------------------------------------------------------|---------------------------------------------------------------------|
| Burkitt's leukaemia                            | Leukaemias acute lymphocytic                                        | Leukaemias                                                             | Neoplasms benign, malignant and unspecified (incl cysts and polyps) |
| Malignant mesenteric neoplasm                  | Gastrointestinal neoplasms malignant NEC                            | Gastrointestinal neoplasms malignant and unspecified                   | Neoplasms benign, malignant and unspecified (incl cysts and polyps) |
| Hepatic angiosarcoma                           | Hepatic neoplasms malignant                                         | Hepatobiliary neoplasms malignant and unspecified                      | Neoplasms benign, malignant and unspecified (incl cysts and polyps) |
| Acute biphenotypic leukaemia                   | Leukaemias acute NEC                                                | Leukaemias                                                             | Neoplasms benign, malignant and unspecified (incl cysts and polyps) |
| Leukaemic infiltration gingiva                 | Leukaemias NEC                                                      | Leukaemias                                                             | Neoplasms benign, malignant and unspecified (incl cysts and polyps) |
| Choroid plexus carcinoma                       | Central nervous system neoplasms malignant NEC                      | Nervous system neoplasms malignant and unspecified NEC                 | Neoplasms benign, malignant and unspecified (incl cysts and polyps) |
| Pancreatic neuroendocrine tumour               | Islet cell neoplasms and APUDoma NEC                                | Endocrine neoplasms malignant and unspecified                          | Neoplasms benign, malignant and unspecified (incl cysts and polyps) |
| Gingival cancer                                | Lip and oral cavity neoplasms malignant                             | Gastrointestinal neoplasms malignant and unspecified                   | Neoplasms benign, malignant and unspecified (incl cysts and polyps) |
| Head and neck cancer                           | Neoplasms malignant site unspecified NEC                            | Miscellaneous and site unspecified neoplasms malignant and unspecified | Neoplasms benign, malignant and unspecified (incl cysts and polyps) |
| Inflammatory myofibroblastic tumour            | Soft tissue neoplasms malignant and unspecified NEC (excl sarcomas) | Soft tissue neoplasms malignant and unspecified                        | Neoplasms benign, malignant and unspecified (incl cysts and polyps) |
| Hereditary papillary renal carcinoma           | Renal and urinary tract disorders congenital NEC                    | Renal and urinary tract disorders congenital                           | Congenital, familial and genetic disorders                          |
| Hereditary leiomyomatosis renal cell carcinoma | Renal and urinary tract disorders congenital NEC                    | Renal and urinary tract disorders congenital                           | Congenital, familial and genetic disorders                          |
| Renal cell carcinoma                           | Renal neoplasms malignant                                           | Renal and urinary tract neoplasms malignant and unspecified            | Neoplasms benign, malignant and unspecified (incl cysts and polyps) |
| Adenocarcinoma of salivary gland               | Salivary gland neoplasms malignant                                  | Gastrointestinal neoplasms malignant and unspecified                   | Neoplasms benign, malignant and unspecified (incl cysts and polyps) |
| Metastatic carcinoid tumour                    | Carcinoid tumours                                                   | Endocrine neoplasms malignant and unspecified                          | Neoplasms benign, malignant and                                     |

|                                          |                                                          |                                                          |                                                                     |
|------------------------------------------|----------------------------------------------------------|----------------------------------------------------------|---------------------------------------------------------------------|
|                                          |                                                          |                                                          | unspecified (incl cysts and polyps)                                 |
| Metastatic uterine cancer                | Uterine neoplasms malignant NEC                          | Reproductive neoplasms female malignant and unspecified  | Neoplasms benign, malignant and unspecified (incl cysts and polyps) |
| Metastatic ocular melanoma               | Ocular melanomas                                         | Ocular neoplasms                                         | Neoplasms benign, malignant and unspecified (incl cysts and polyps) |
| Malignant neoplasm of seminal vesicle    | Reproductive neoplasms male malignant NEC                | Reproductive neoplasms male malignant and unspecified    | Neoplasms benign, malignant and unspecified (incl cysts and polyps) |
| Extramammary Paget's disease             | Skin neoplasms malignant and unspecified (excl melanoma) | Skin neoplasms malignant and unspecified                 | Neoplasms benign, malignant and unspecified (incl cysts and polyps) |
| Chronic myeloid leukaemia transformation | Leukaemias chronic myeloid                               | Leukaemias                                               | Neoplasms benign, malignant and unspecified (incl cysts and polyps) |
| 5q minus syndrome                        | Myelodysplastic syndromes                                | Leukaemias                                               | Neoplasms benign, malignant and unspecified (incl cysts and polyps) |
| Breast sarcoma                           | Breast and nipple neoplasms malignant                    | Breast neoplasms malignant and unspecified (incl nipple) | Neoplasms benign, malignant and unspecified (incl cysts and polyps) |
| Breast sarcoma metastatic                | Breast and nipple neoplasms malignant                    | Breast neoplasms malignant and unspecified (incl nipple) | Neoplasms benign, malignant and unspecified (incl cysts and polyps) |
| Breast sarcoma recurrent                 | Breast and nipple neoplasms malignant                    | Breast neoplasms malignant and unspecified (incl nipple) | Neoplasms benign, malignant and unspecified (incl cysts and polyps) |
| Sarcoma metastatic                       | Soft tissue sarcomas histology unspecified               | Soft tissue neoplasms malignant and unspecified          | Neoplasms benign, malignant and unspecified (incl cysts and polyps) |
| Glioneuronal tumour                      | Nervous system neoplasms unspecified malignancy NEC      | Nervous system neoplasms malignant and unspecified NEC   | Neoplasms benign, malignant and unspecified (incl cysts and polyps) |
| Testicular germ cell cancer metastatic   | Testicular neoplasms malignant                           | Reproductive neoplasms male malignant and unspecified    | Neoplasms benign, malignant and unspecified (incl cysts and polyps) |
| Sebaceous carcinoma                      | Skin neoplasms malignant and unspecified (excl melanoma) | Skin neoplasms malignant and unspecified                 | Neoplasms benign, malignant and unspecified (incl cysts and polyps) |

|                                              |                                                                                 |                                                                        |                                                                     |
|----------------------------------------------|---------------------------------------------------------------------------------|------------------------------------------------------------------------|---------------------------------------------------------------------|
| Histiocytic medullary reticulosis            | Histiocytoses                                                                   | Haematopoietic neoplasms (excl leukaemias and lymphomas)               | Neoplasms benign, malignant and unspecified (incl cysts and polyps) |
| Adenosquamous cell carcinoma                 | Neoplasms malignant site unspecified NEC                                        | Miscellaneous and site unspecified neoplasms malignant and unspecified | Neoplasms benign, malignant and unspecified (incl cysts and polyps) |
| Pancreatic neuroendocrine tumour metastatic  | Islet cell neoplasms and APUDoma NEC                                            | Endocrine neoplasms malignant and unspecified                          | Neoplasms benign, malignant and unspecified (incl cysts and polyps) |
| Primitive neuroectodermal tumour metastatic  | Nervous system neoplasms malignant NEC                                          | Nervous system neoplasms malignant and unspecified NEC                 | Neoplasms benign, malignant and unspecified (incl cysts and polyps) |
| Germ cell cancer metastatic                  | Germ cell neoplasms site unspecified NEC                                        | Miscellaneous and site unspecified neoplasms malignant and unspecified | Neoplasms benign, malignant and unspecified (incl cysts and polyps) |
| Peritoneal carcinoma metastatic              | Gastrointestinal neoplasms malignant NEC                                        | Gastrointestinal neoplasms malignant and unspecified                   | Neoplasms benign, malignant and unspecified (incl cysts and polyps) |
| Solid pseudopapillary tumour of the pancreas | Pancreatic neoplasms malignant (excl islet cell and carcinoid)                  | Gastrointestinal neoplasms malignant and unspecified                   | Neoplasms benign, malignant and unspecified (incl cysts and polyps) |
| Leukaemic infiltration renal                 | Leukaemias NEC                                                                  | Leukaemias                                                             | Neoplasms benign, malignant and unspecified (incl cysts and polyps) |
| Leukaemic infiltration                       | Leukaemias NEC                                                                  | Leukaemias                                                             | Neoplasms benign, malignant and unspecified (incl cysts and polyps) |
| Eccrine carcinoma                            | Skin neoplasms malignant and unspecified (excl melanoma)                        | Skin neoplasms malignant and unspecified                               | Neoplasms benign, malignant and unspecified (incl cysts and polyps) |
| Rectosigmoid cancer metastatic               | Colorectal neoplasms malignant                                                  | Gastrointestinal neoplasms malignant and unspecified                   | Neoplasms benign, malignant and unspecified (incl cysts and polyps) |
| Large cell lung cancer metastatic            | Non-small cell neoplasms malignant of the respiratory tract cell type specified | Respiratory and mediastinal neoplasms malignant and unspecified        | Neoplasms benign, malignant and unspecified (incl cysts and polyps) |
| Testicular choriocarcinoma recurrent         | Testicular neoplasms malignant                                                  | Reproductive neoplasms male malignant and unspecified                  | Neoplasms benign, malignant and unspecified (incl cysts and polyps) |
| Testis cancer recurrent                      | Testicular neoplasms malignant                                                  | Reproductive neoplasms male malignant and unspecified                  | Neoplasms benign, malignant and unspecified (incl cysts and polyps) |

|                                           |                                              |                                                                        |                                                                     |
|-------------------------------------------|----------------------------------------------|------------------------------------------------------------------------|---------------------------------------------------------------------|
| Refractory cancer                         | Neoplasms malignant site unspecified NEC     | Miscellaneous and site unspecified neoplasms malignant and unspecified | Neoplasms benign, malignant and unspecified (incl cysts and polyps) |
| Thyroid cancer stage 0                    | Thyroid neoplasms malignant                  | Endocrine neoplasms malignant and unspecified                          | Neoplasms benign, malignant and unspecified (incl cysts and polyps) |
| Oestrogen receptor positive breast cancer | Breast and nipple neoplasms malignant        | Breast neoplasms malignant and unspecified (incl nipple)               | Neoplasms benign, malignant and unspecified (incl cysts and polyps) |
| Laryngeal cancer metastatic               | Laryngeal neoplasms malignant                | Respiratory and mediastinal neoplasms malignant and unspecified        | Neoplasms benign, malignant and unspecified (incl cysts and polyps) |
| Ovarian cancer stage I                    | Ovarian neoplasms malignant (excl germ cell) | Reproductive neoplasms female malignant and unspecified                | Neoplasms benign, malignant and unspecified (incl cysts and polyps) |
| Ovarian cancer stage II                   | Ovarian neoplasms malignant (excl germ cell) | Reproductive neoplasms female malignant and unspecified                | Neoplasms benign, malignant and unspecified (incl cysts and polyps) |
| Ovarian cancer stage III                  | Ovarian neoplasms malignant (excl germ cell) | Reproductive neoplasms female malignant and unspecified                | Neoplasms benign, malignant and unspecified (incl cysts and polyps) |
| Ovarian cancer stage IV                   | Ovarian neoplasms malignant (excl germ cell) | Reproductive neoplasms female malignant and unspecified                | Neoplasms benign, malignant and unspecified (incl cysts and polyps) |
| Metastases to pelvis                      | Metastases to specified sites                | Metastases                                                             | Neoplasms benign, malignant and unspecified (incl cysts and polyps) |
| Abdominal wall neoplasm malignant         | Gastrointestinal neoplasms malignant NEC     | Gastrointestinal neoplasms malignant and unspecified                   | Neoplasms benign, malignant and unspecified (incl cysts and polyps) |
| Thyroid cancer stage I                    | Thyroid neoplasms malignant                  | Endocrine neoplasms malignant and unspecified                          | Neoplasms benign, malignant and unspecified (incl cysts and polyps) |
| Thyroid cancer stage II                   | Thyroid neoplasms malignant                  | Endocrine neoplasms malignant and unspecified                          | Neoplasms benign, malignant and unspecified (incl cysts and polyps) |
| Thyroid cancer stage III                  | Thyroid neoplasms malignant                  | Endocrine neoplasms malignant and unspecified                          | Neoplasms benign, malignant and unspecified (incl cysts and polyps) |
| Thyroid cancer stage IV                   | Thyroid neoplasms malignant                  | Endocrine neoplasms malignant and unspecified                          | Neoplasms benign, malignant and unspecified (incl cysts and polyps) |

|                                         |                                                                                 |                                                                        |                                                                     |
|-----------------------------------------|---------------------------------------------------------------------------------|------------------------------------------------------------------------|---------------------------------------------------------------------|
| Transitional cell carcinoma metastatic  | Urinary tract neoplasms malignant NEC                                           | Renal and urinary tract neoplasms malignant and unspecified            | Neoplasms benign, malignant and unspecified (incl cysts and polyps) |
| Hormone-dependent prostate cancer       | Prostatic neoplasms malignant                                                   | Reproductive neoplasms male malignant and unspecified                  | Neoplasms benign, malignant and unspecified (incl cysts and polyps) |
| Tongue cancer recurrent                 | Lip and oral cavity neoplasms malignant                                         | Gastrointestinal neoplasms malignant and unspecified                   | Neoplasms benign, malignant and unspecified (incl cysts and polyps) |
| Epstein-Barr virus associated lymphoma  | B-cell lymphomas NEC                                                            | Lymphomas non-Hodgkin's B-cell                                         | Neoplasms benign, malignant and unspecified (incl cysts and polyps) |
| Metastatic choriocarcinoma              | Germ cell neoplasms site unspecified NEC                                        | Miscellaneous and site unspecified neoplasms malignant and unspecified | Neoplasms benign, malignant and unspecified (incl cysts and polyps) |
| Lung squamous cell carcinoma metastatic | Non-small cell neoplasms malignant of the respiratory tract cell type specified | Respiratory and mediastinal neoplasms malignant and unspecified        | Neoplasms benign, malignant and unspecified (incl cysts and polyps) |
| Non-Hodgkin's lymphoma metastatic       | Non-Hodgkin's lymphomas NEC                                                     | Lymphomas non-Hodgkin's unspecified histology                          | Neoplasms benign, malignant and unspecified (incl cysts and polyps) |
| Head and neck cancer stage IV           | Neoplasms malignant site unspecified NEC                                        | Miscellaneous and site unspecified neoplasms malignant and unspecified | Neoplasms benign, malignant and unspecified (incl cysts and polyps) |
| Head and neck cancer stage III          | Neoplasms malignant site unspecified NEC                                        | Miscellaneous and site unspecified neoplasms malignant and unspecified | Neoplasms benign, malignant and unspecified (incl cysts and polyps) |
| Head and neck cancer stage II           | Neoplasms malignant site unspecified NEC                                        | Miscellaneous and site unspecified neoplasms malignant and unspecified | Neoplasms benign, malignant and unspecified (incl cysts and polyps) |
| Head and neck cancer stage I            | Neoplasms malignant site unspecified NEC                                        | Miscellaneous and site unspecified neoplasms malignant and unspecified | Neoplasms benign, malignant and unspecified (incl cysts and polyps) |
| Head and neck cancer metastatic         | Neoplasms malignant site unspecified NEC                                        | Miscellaneous and site unspecified neoplasms malignant and unspecified | Neoplasms benign, malignant and unspecified (incl cysts and polyps) |
| Metastatic lymphoma                     | Lymphomas unspecified NEC                                                       | Lymphomas NEC                                                          | Neoplasms benign, malignant and unspecified (incl cysts and polyps) |
| Neuroendocrine carcinoma metastatic     | Endocrine neoplasms malignant and unspecified NEC                               | Endocrine neoplasms malignant and unspecified                          | Neoplasms benign, malignant and unspecified (incl cysts and polyps) |

|                                                                         |                                                                                 |                                                                 |                                                                     |
|-------------------------------------------------------------------------|---------------------------------------------------------------------------------|-----------------------------------------------------------------|---------------------------------------------------------------------|
| Gastrointestinal stromal cancer                                         | Gastrointestinal neoplasms malignant NEC                                        | Gastrointestinal neoplasms malignant and unspecified            | Neoplasms benign, malignant and unspecified (incl cysts and polyps) |
| Bladder transitional cell carcinoma metastatic                          | Bladder neoplasms malignant                                                     | Renal and urinary tract neoplasms malignant and unspecified     | Neoplasms benign, malignant and unspecified (incl cysts and polyps) |
| Thyroid cancer recurrent                                                | Thyroid neoplasms malignant                                                     | Endocrine neoplasms malignant and unspecified                   | Neoplasms benign, malignant and unspecified (incl cysts and polyps) |
| Malignant neoplasm of pleura metastatic                                 | Respiratory tract and pleural neoplasms malignant cell type unspecified NEC     | Respiratory and mediastinal neoplasms malignant and unspecified | Neoplasms benign, malignant and unspecified (incl cysts and polyps) |
| Malignant blue naevus                                                   | Skin melanomas (excl ocular)                                                    | Skin neoplasms malignant and unspecified                        | Neoplasms benign, malignant and unspecified (incl cysts and polyps) |
| Desmoplastic melanoma                                                   | Skin melanomas (excl ocular)                                                    | Skin neoplasms malignant and unspecified                        | Neoplasms benign, malignant and unspecified (incl cysts and polyps) |
| Spitzoid melanoma                                                       | Skin melanomas (excl ocular)                                                    | Skin neoplasms malignant and unspecified                        | Neoplasms benign, malignant and unspecified (incl cysts and polyps) |
| Thyroid B-cell lymphoma                                                 | B-cell lymphomas NEC                                                            | Lymphomas non-Hodgkin's B-cell                                  | Neoplasms benign, malignant and unspecified (incl cysts and polyps) |
| Tonsil cancer metastatic                                                | Oropharyngeal, nasopharyngeal and tonsillar neoplasms malignant and unspecified | Respiratory and mediastinal neoplasms malignant and unspecified | Neoplasms benign, malignant and unspecified (incl cysts and polyps) |
| Urethral melanoma metastatic                                            | Urinary tract neoplasms malignant NEC                                           | Renal and urinary tract neoplasms malignant and unspecified     | Neoplasms benign, malignant and unspecified (incl cysts and polyps) |
| Immune reconstitution inflammatory syndrome associated Kaposi's sarcoma | Kaposi's sarcomas                                                               | Soft tissue neoplasms malignant and unspecified                 | Neoplasms benign, malignant and unspecified (incl cysts and polyps) |
| Breast angiosarcoma                                                     | Breast and nipple neoplasms malignant                                           | Breast neoplasms malignant and unspecified (incl nipple)        | Neoplasms benign, malignant and unspecified (incl cysts and polyps) |
| Breast angiosarcoma metastatic                                          | Breast and nipple neoplasms malignant                                           | Breast neoplasms malignant and unspecified (incl nipple)        | Neoplasms benign, malignant and unspecified (incl cysts and polyps) |
| Skin angiosarcoma                                                       | Skin neoplasms malignant and unspecified (excl melanoma)                        | Skin neoplasms malignant and unspecified                        | Neoplasms benign, malignant and unspecified (incl cysts and polyps) |



|                                             |                                          |                                                                        |                                                                     |
|---------------------------------------------|------------------------------------------|------------------------------------------------------------------------|---------------------------------------------------------------------|
| Extragenadal primary germ cell tumour       | Extragenadal primary germ cell neoplasms | Miscellaneous and site unspecified neoplasms malignant and unspecified | Neoplasms benign, malignant and unspecified (incl cysts and polyps) |
| Extragenadal primary germ cell tumour mixed | Extragenadal primary germ cell neoplasms | Miscellaneous and site unspecified neoplasms malignant and unspecified | Neoplasms benign, malignant and unspecified (incl cysts and polyps) |
| Extragenadal primary seminoma (pure)        | Extragenadal primary germ cell neoplasms | Miscellaneous and site unspecified neoplasms malignant and unspecified | Neoplasms benign, malignant and unspecified (incl cysts and polyps) |
| Malignant neoplasm of unknown primary site  | Neoplasms malignant site unspecified NEC | Miscellaneous and site unspecified neoplasms malignant and unspecified | Neoplasms benign, malignant and unspecified (incl cysts and polyps) |
| Biphasic mesothelioma                       | Mesotheliomas malignant and unspecified  | Mesotheliomas                                                          | Neoplasms benign, malignant and unspecified (incl cysts and polyps) |
| Desmoplastic mesothelioma                   | Mesotheliomas malignant and unspecified  | Mesotheliomas                                                          | Neoplasms benign, malignant and unspecified (incl cysts and polyps) |
| Epithelioid mesothelioma                    | Mesotheliomas malignant and unspecified  | Mesotheliomas                                                          | Neoplasms benign, malignant and unspecified (incl cysts and polyps) |
| Sarcomatoid mesothelioma                    | Mesotheliomas malignant and unspecified  | Mesotheliomas                                                          | Neoplasms benign, malignant and unspecified (incl cysts and polyps) |
| Pericardial mesothelioma malignant          | Mesotheliomas malignant and unspecified  | Mesotheliomas                                                          | Neoplasms benign, malignant and unspecified (incl cysts and polyps) |
| Gallbladder adenosquamous carcinoma         | Gallbladder neoplasms malignant          | Hepatobiliary neoplasms malignant and unspecified                      | Neoplasms benign, malignant and unspecified (incl cysts and polyps) |
| Gallbladder squamous cell carcinoma         | Gallbladder neoplasms malignant          | Hepatobiliary neoplasms malignant and unspecified                      | Neoplasms benign, malignant and unspecified (incl cysts and polyps) |
| Hepatic cancer                              | Hepatic neoplasms malignant              | Hepatobiliary neoplasms malignant and unspecified                      | Neoplasms benign, malignant and unspecified (incl cysts and polyps) |
| Hepatic cancer recurrent                    | Hepatic neoplasms malignant              | Hepatobiliary neoplasms malignant and unspecified                      | Neoplasms benign, malignant and unspecified (incl cysts and polyps) |
| Hepatocellular carcinoma                    | Hepatic neoplasms malignant              | Hepatobiliary neoplasms malignant and unspecified                      | Neoplasms benign, malignant and unspecified (incl cysts and polyps) |

|                                         |                                                          |                                                          |                                                                     |
|-----------------------------------------|----------------------------------------------------------|----------------------------------------------------------|---------------------------------------------------------------------|
| Hepatobiliary cancer                    | Hepatobiliary neoplasms malignant NEC                    | Hepatobiliary neoplasms malignant and unspecified        | Neoplasms benign, malignant and unspecified (incl cysts and polyps) |
| Hepatobiliary cancer in situ            | Hepatobiliary neoplasms malignant NEC                    | Hepatobiliary neoplasms malignant and unspecified        | Neoplasms benign, malignant and unspecified (incl cysts and polyps) |
| Iris melanoma                           | Ocular melanomas                                         | Ocular neoplasms                                         | Neoplasms benign, malignant and unspecified (incl cysts and polyps) |
| Malignant sweat gland neoplasm          | Skin neoplasms malignant and unspecified (excl melanoma) | Skin neoplasms malignant and unspecified                 | Neoplasms benign, malignant and unspecified (incl cysts and polyps) |
| Hidradenocarcinoma                      | Skin neoplasms malignant and unspecified (excl melanoma) | Skin neoplasms malignant and unspecified                 | Neoplasms benign, malignant and unspecified (incl cysts and polyps) |
| Intraductal proliferative breast lesion | Breast and nipple neoplasms malignant                    | Breast neoplasms malignant and unspecified (incl nipple) | Neoplasms benign, malignant and unspecified (incl cysts and polyps) |
| Invasive ductal breast carcinoma        | Breast and nipple neoplasms malignant                    | Breast neoplasms malignant and unspecified (incl nipple) | Neoplasms benign, malignant and unspecified (incl cysts and polyps) |
| Invasive lobular breast carcinoma       | Breast and nipple neoplasms malignant                    | Breast neoplasms malignant and unspecified (incl nipple) | Neoplasms benign, malignant and unspecified (incl cysts and polyps) |
| Invasive papillary breast carcinoma     | Breast and nipple neoplasms malignant                    | Breast neoplasms malignant and unspecified (incl nipple) | Neoplasms benign, malignant and unspecified (incl cysts and polyps) |
| Lobular breast carcinoma in situ        | Breast and nipple neoplasms malignant                    | Breast neoplasms malignant and unspecified (incl nipple) | Neoplasms benign, malignant and unspecified (incl cysts and polyps) |
| Metaplastic breast carcinoma            | Breast and nipple neoplasms malignant                    | Breast neoplasms malignant and unspecified (incl nipple) | Neoplasms benign, malignant and unspecified (incl cysts and polyps) |
| Mucinous breast carcinoma               | Breast and nipple neoplasms malignant                    | Breast neoplasms malignant and unspecified (incl nipple) | Neoplasms benign, malignant and unspecified (incl cysts and polyps) |
| Neuroendocrine breast tumour            | Breast and nipple neoplasms malignant                    | Breast neoplasms malignant and unspecified (incl nipple) | Neoplasms benign, malignant and unspecified (incl cysts and polyps) |
| Tubular breast carcinoma                | Breast and nipple neoplasms malignant                    | Breast neoplasms malignant and unspecified (incl nipple) | Neoplasms benign, malignant and unspecified (incl cysts and polyps) |

|                                                  |                                                     |                                                        |                                                                     |
|--------------------------------------------------|-----------------------------------------------------|--------------------------------------------------------|---------------------------------------------------------------------|
| Bone giant cell tumour malignant                 | Bone sarcomas                                       | Skeletal neoplasms malignant and unspecified           | Neoplasms benign, malignant and unspecified (incl cysts and polyps) |
| Peripheral primitive neuroectodermal bone tumour | Bone sarcomas                                       | Skeletal neoplasms malignant and unspecified           | Neoplasms benign, malignant and unspecified (incl cysts and polyps) |
| Epididymal cancer                                | Reproductive neoplasms male malignant NEC           | Reproductive neoplasms male malignant and unspecified  | Neoplasms benign, malignant and unspecified (incl cysts and polyps) |
| Genital cancer male                              | Reproductive neoplasms male malignant NEC           | Reproductive neoplasms male malignant and unspecified  | Neoplasms benign, malignant and unspecified (incl cysts and polyps) |
| Spermatocytic seminoma                           | Testicular neoplasms malignant                      | Reproductive neoplasms male malignant and unspecified  | Neoplasms benign, malignant and unspecified (incl cysts and polyps) |
| Testicular germ cell tumour mixed                | Testicular neoplasms malignant                      | Reproductive neoplasms male malignant and unspecified  | Neoplasms benign, malignant and unspecified (incl cysts and polyps) |
| Testicular malignant teratoma                    | Testicular neoplasms malignant                      | Reproductive neoplasms male malignant and unspecified  | Neoplasms benign, malignant and unspecified (incl cysts and polyps) |
| Testicular yolk sac tumour                       | Testicular neoplasms malignant                      | Reproductive neoplasms male malignant and unspecified  | Neoplasms benign, malignant and unspecified (incl cysts and polyps) |
| Genital cancer male in situ                      | Reproductive neoplasms male malignant NEC           | Reproductive neoplasms male malignant and unspecified  | Neoplasms benign, malignant and unspecified (incl cysts and polyps) |
| Anaplastic meningioma                            | Meningiomas malignant                               | Nervous system neoplasms malignant and unspecified NEC | Neoplasms benign, malignant and unspecified (incl cysts and polyps) |
| Anaplastic oligodendroglioma                     | Glial tumours malignant                             | Nervous system neoplasms malignant and unspecified NEC | Neoplasms benign, malignant and unspecified (incl cysts and polyps) |
| Angiocentric glioma                              | Nervous system neoplasms unspecified malignancy NEC | Nervous system neoplasms malignant and unspecified NEC | Neoplasms benign, malignant and unspecified (incl cysts and polyps) |
| Central nervous system neuroblastoma             | Nervous system neoplasms malignant NEC              | Nervous system neoplasms malignant and unspecified NEC | Neoplasms benign, malignant and unspecified (incl cysts and polyps) |
| Oligoastrocytoma                                 | Glial tumours malignant                             | Nervous system neoplasms malignant and unspecified NEC | Neoplasms benign, malignant and unspecified (incl cysts and polyps) |

|                                                            |                                                                     |                                                 |                                                                     |
|------------------------------------------------------------|---------------------------------------------------------------------|-------------------------------------------------|---------------------------------------------------------------------|
| Plasma cell myeloma in remission                           | Plasma cell myelomas                                                | Plasma cell neoplasms                           | Neoplasms benign, malignant and unspecified (incl cysts and polyps) |
| Plasma cell myeloma recurrent                              | Plasma cell myelomas                                                | Plasma cell neoplasms                           | Neoplasms benign, malignant and unspecified (incl cysts and polyps) |
| Extraskeletal myxoid chondrosarcoma                        | Extraskeletal chondrosarcomas                                       | Soft tissue neoplasms malignant and unspecified | Neoplasms benign, malignant and unspecified (incl cysts and polyps) |
| Dedifferentiated liposarcoma                               | Liposarcomas malignant                                              | Soft tissue neoplasms malignant and unspecified | Neoplasms benign, malignant and unspecified (incl cysts and polyps) |
| Mixed-type liposarcoma                                     | Liposarcomas malignant                                              | Soft tissue neoplasms malignant and unspecified | Neoplasms benign, malignant and unspecified (incl cysts and polyps) |
| Myxoid liposarcoma                                         | Liposarcomas malignant                                              | Soft tissue neoplasms malignant and unspecified | Neoplasms benign, malignant and unspecified (incl cysts and polyps) |
| Pleomorphic liposarcoma                                    | Liposarcomas malignant                                              | Soft tissue neoplasms malignant and unspecified | Neoplasms benign, malignant and unspecified (incl cysts and polyps) |
| Round cell liposarcoma                                     | Liposarcomas malignant                                              | Soft tissue neoplasms malignant and unspecified | Neoplasms benign, malignant and unspecified (incl cysts and polyps) |
| Clear cell sarcoma of soft tissue                          | Soft tissue sarcomas histology unspecified                          | Soft tissue neoplasms malignant and unspecified | Neoplasms benign, malignant and unspecified (incl cysts and polyps) |
| Malignant giant cell fibrous histiocytoma                  | Fibrous histiocytomas malignant                                     | Soft tissue neoplasms malignant and unspecified | Neoplasms benign, malignant and unspecified (incl cysts and polyps) |
| Inflammatory malignant fibrous histiocytoma                | Fibrous histiocytomas malignant                                     | Soft tissue neoplasms malignant and unspecified | Neoplasms benign, malignant and unspecified (incl cysts and polyps) |
| Pleomorphic malignant fibrous histiocytoma                 | Fibrous histiocytomas malignant                                     | Soft tissue neoplasms malignant and unspecified | Neoplasms benign, malignant and unspecified (incl cysts and polyps) |
| Peripheral primitive neuroectodermal tumour of soft tissue | Soft tissue neoplasms malignant and unspecified NEC (excl sarcomas) | Soft tissue neoplasms malignant and unspecified | Neoplasms benign, malignant and unspecified (incl cysts and polyps) |
| Adrenal gland cancer                                       | Adrenal neoplasms malignant                                         | Endocrine neoplasms malignant and unspecified   | Neoplasms benign, malignant and unspecified (incl cysts and polyps) |

|                                                     |                                                                                 |                                                                        |                                                                     |
|-----------------------------------------------------|---------------------------------------------------------------------------------|------------------------------------------------------------------------|---------------------------------------------------------------------|
| Familial medullary thyroid cancer                   | Endocrine disorders congenital NEC                                              | Endocrine disorders congenital                                         | Congenital, familial and genetic disorders                          |
| Clear cell renal cell carcinoma                     | Renal neoplasms malignant                                                       | Renal and urinary tract neoplasms malignant and unspecified            | Neoplasms benign, malignant and unspecified (incl cysts and polyps) |
| Ovarian germ cell tumour mixed                      | Ovarian germ cell neoplasms malignant                                           | Reproductive neoplasms female malignant and unspecified                | Neoplasms benign, malignant and unspecified (incl cysts and polyps) |
| Ovarian germ cell choriocarcinoma                   | Ovarian germ cell neoplasms malignant                                           | Reproductive neoplasms female malignant and unspecified                | Neoplasms benign, malignant and unspecified (incl cysts and polyps) |
| Ovarian germ cell endodermal sinus tumour           | Ovarian germ cell neoplasms malignant                                           | Reproductive neoplasms female malignant and unspecified                | Neoplasms benign, malignant and unspecified (incl cysts and polyps) |
| Ovarian germ cell polyembryoma                      | Ovarian germ cell neoplasms malignant                                           | Reproductive neoplasms female malignant and unspecified                | Neoplasms benign, malignant and unspecified (incl cysts and polyps) |
| Ovarian germ cell teratoma                          | Ovarian germ cell neoplasms malignant                                           | Reproductive neoplasms female malignant and unspecified                | Neoplasms benign, malignant and unspecified (incl cysts and polyps) |
| Ovarian clear cell carcinoma                        | Ovarian neoplasms malignant (excl germ cell)                                    | Reproductive neoplasms female malignant and unspecified                | Neoplasms benign, malignant and unspecified (incl cysts and polyps) |
| Ovarian endometrioid carcinoma                      | Ovarian neoplasms malignant (excl germ cell)                                    | Reproductive neoplasms female malignant and unspecified                | Neoplasms benign, malignant and unspecified (incl cysts and polyps) |
| Keratinising squamous cell carcinoma of nasopharynx | Oropharyngeal, nasopharyngeal and tonsillar neoplasms malignant and unspecified | Respiratory and mediastinal neoplasms malignant and unspecified        | Neoplasms benign, malignant and unspecified (incl cysts and polyps) |
| Nonkeratinising carcinoma of nasopharynx            | Oropharyngeal, nasopharyngeal and tonsillar neoplasms malignant and unspecified | Respiratory and mediastinal neoplasms malignant and unspecified        | Neoplasms benign, malignant and unspecified (incl cysts and polyps) |
| Undifferentiated nasopharyngeal carcinoma           | Oropharyngeal, nasopharyngeal and tonsillar neoplasms malignant and unspecified | Respiratory and mediastinal neoplasms malignant and unspecified        | Neoplasms benign, malignant and unspecified (incl cysts and polyps) |
| Rhabdoid tumour                                     | Neoplasms malignant site unspecified NEC                                        | Miscellaneous and site unspecified neoplasms malignant and unspecified | Neoplasms benign, malignant and unspecified (incl cysts and polyps) |
| Optic glioma                                        | Ocular neoplasms malignancy unspecified                                         | Ocular neoplasms                                                       | Neoplasms benign, malignant and unspecified (incl cysts and polyps) |

|                                                      |                                                                |                                                      |                                                                     |
|------------------------------------------------------|----------------------------------------------------------------|------------------------------------------------------|---------------------------------------------------------------------|
| Anal squamous cell carcinoma                         | Anal canal neoplasms malignant                                 | Gastrointestinal neoplasms malignant and unspecified | Neoplasms benign, malignant and unspecified (incl cysts and polyps) |
| Adenocarcinoma of appendix                           | Colorectal neoplasms malignant                                 | Gastrointestinal neoplasms malignant and unspecified | Neoplasms benign, malignant and unspecified (incl cysts and polyps) |
| Appendix cancer                                      | Colorectal neoplasms malignant                                 | Gastrointestinal neoplasms malignant and unspecified | Neoplasms benign, malignant and unspecified (incl cysts and polyps) |
| Mucinous adenocarcinoma of appendix                  | Colorectal neoplasms malignant                                 | Gastrointestinal neoplasms malignant and unspecified | Neoplasms benign, malignant and unspecified (incl cysts and polyps) |
| Undifferentiated carcinoma of colon                  | Colorectal neoplasms malignant                                 | Gastrointestinal neoplasms malignant and unspecified | Neoplasms benign, malignant and unspecified (incl cysts and polyps) |
| Acinar cell carcinoma of pancreas                    | Pancreatic neoplasms malignant (excl islet cell and carcinoid) | Gastrointestinal neoplasms malignant and unspecified | Neoplasms benign, malignant and unspecified (incl cysts and polyps) |
| Ductal adenocarcinoma of pancreas                    | Pancreatic neoplasms malignant (excl islet cell and carcinoid) | Gastrointestinal neoplasms malignant and unspecified | Neoplasms benign, malignant and unspecified (incl cysts and polyps) |
| Intraductal papillary-mucinous carcinoma of pancreas | Pancreatic neoplasms malignant (excl islet cell and carcinoid) | Gastrointestinal neoplasms malignant and unspecified | Neoplasms benign, malignant and unspecified (incl cysts and polyps) |
| Mucinous cystadenocarcinoma of pancreas              | Pancreatic neoplasms malignant (excl islet cell and carcinoid) | Gastrointestinal neoplasms malignant and unspecified | Neoplasms benign, malignant and unspecified (incl cysts and polyps) |
| Pancreatoblastoma                                    | Pancreatic neoplasms malignant (excl islet cell and carcinoid) | Gastrointestinal neoplasms malignant and unspecified | Neoplasms benign, malignant and unspecified (incl cysts and polyps) |
| Serous cystadenocarcinoma of pancreas                | Pancreatic neoplasms malignant (excl islet cell and carcinoid) | Gastrointestinal neoplasms malignant and unspecified | Neoplasms benign, malignant and unspecified (incl cysts and polyps) |
| Acinic cell carcinoma of salivary gland              | Salivary gland neoplasms malignant                             | Gastrointestinal neoplasms malignant and unspecified | Neoplasms benign, malignant and unspecified (incl cysts and polyps) |
| Adenoid cystic carcinoma of salivary gland           | Salivary gland neoplasms malignant                             | Gastrointestinal neoplasms malignant and unspecified | Neoplasms benign, malignant and unspecified (incl cysts and polyps) |
| Mucoepidermoid carcinoma of salivary gland           | Salivary gland neoplasms malignant                             | Gastrointestinal neoplasms malignant and unspecified | Neoplasms benign, malignant and unspecified (incl cysts and polyps) |

|                                              |                                                |                                                          |                                                                     |
|----------------------------------------------|------------------------------------------------|----------------------------------------------------------|---------------------------------------------------------------------|
| Small intestine adenocarcinoma               | Small intestinal neoplasms malignant           | Gastrointestinal neoplasms malignant and unspecified     | Neoplasms benign, malignant and unspecified (incl cysts and polyps) |
| Congenital retinoblastoma                    | Retinal disorders congenital                   | Eye disorders congenital                                 | Congenital, familial and genetic disorders                          |
| Anaplastic large-cell lymphoma               | Lymphomas unspecified NEC                      | Lymphomas NEC                                            | Neoplasms benign, malignant and unspecified (incl cysts and polyps) |
| Acute undifferentiated leukaemia             | Leukaemias acute NEC                           | Leukaemias                                               | Neoplasms benign, malignant and unspecified (incl cysts and polyps) |
| B-cell prolymphocytic leukaemia              | B-cell small lymphocytic lymphomas             | Lymphomas non-Hodgkin's B-cell                           | Neoplasms benign, malignant and unspecified (incl cysts and polyps) |
| Enteropathy-associated T-cell lymphoma       | Intestinal T-cell lymphomas                    | Lymphomas non-Hodgkin's T-cell                           | Neoplasms benign, malignant and unspecified (incl cysts and polyps) |
| Congenital malignant neoplasm                | Congenital disorders NEC                       | Congenital and hereditary disorders NEC                  | Congenital, familial and genetic disorders                          |
| Hodgkin's disease nodular sclerosis stage II | Hodgkin's disease nodular sclerosis type       | Lymphomas Hodgkin's disease                              | Neoplasms benign, malignant and unspecified (incl cysts and polyps) |
| Hodgkin's disease nodular sclerosis stage I  | Hodgkin's disease nodular sclerosis type       | Lymphomas Hodgkin's disease                              | Neoplasms benign, malignant and unspecified (incl cysts and polyps) |
| Intraductal papillary breast neoplasm        | Breast and nipple neoplasms malignant          | Breast neoplasms malignant and unspecified (incl nipple) | Neoplasms benign, malignant and unspecified (incl cysts and polyps) |
| Dermatofibrosarcoma protuberans metastatic   | Fibrosarcomas malignant                        | Soft tissue neoplasms malignant and unspecified          | Neoplasms benign, malignant and unspecified (incl cysts and polyps) |
| Intracranial germ cell tumour                | Central nervous system neoplasms malignant NEC | Nervous system neoplasms malignant and unspecified NEC   | Neoplasms benign, malignant and unspecified (incl cysts and polyps) |
| Brain sarcoma                                | Central nervous system neoplasms malignant NEC | Nervous system neoplasms malignant and unspecified NEC   | Neoplasms benign, malignant and unspecified (incl cysts and polyps) |
| Composite lymphoma                           | Lymphomas unclassifiable malignant             | Lymphomas NEC                                            | Neoplasms benign, malignant and unspecified (incl cysts and polyps) |
| Adenosquamous carcinoma of vagina            | Vaginal neoplasms malignant                    | Reproductive neoplasms female malignant and              | Neoplasms benign, malignant and                                     |

|                                        |                                                                     |                                                             |                                                                     |
|----------------------------------------|---------------------------------------------------------------------|-------------------------------------------------------------|---------------------------------------------------------------------|
|                                        |                                                                     | unspecified                                                 | unspecified (incl cysts and polyps)                                 |
| Malignant connective tissue neoplasm   | Soft tissue neoplasms malignant and unspecified NEC (excl sarcomas) | Soft tissue neoplasms malignant and unspecified             | Neoplasms benign, malignant and unspecified (incl cysts and polyps) |
| Malignant genitourinary tract neoplasm | Urinary tract neoplasms malignant NEC                               | Renal and urinary tract neoplasms malignant and unspecified | Neoplasms benign, malignant and unspecified (incl cysts and polyps) |



## 5 References

---

<sup>i</sup> Casella, G. and Berger, R. L. (2002), Statistical Inference, 2nd ed.

<sup>ii</sup> Schwartz NS, Clutter WE, Shah SD, Cryer PE. Glycemic thresholds for activation of glucose counterregulatory systems are higher than the threshold for symptoms. *J Clin Invest* 1987; 79(3):777-781.

<sup>iii</sup> Seaquist ER, Anderson J, Childs B, Cryer P, Dagogo-Jack S, Fish L et al. Hypoglycemia and diabetes: a report of a workgroup of the American Diabetes Association and the Endocrine Society. *Diabetes Care* 2013; 36(5):1384-1395.
