# Supplementary material
Source: PubMed Central journal article supplement (PMC5817971)
Supplement: jama-318-1460-s002.pdf [file jama-318-1460-s002.pdf]

## Supplementary Online Content

Davies M, Pieber TR, Hartoft-Nielsen M.-L., et al. Effect of oral semaglutide compared with placebo and subcutaneous semaglutide on glycemic control in patients with type 2 diabetes: a randomized clinical trial. *JAMA*. doi:10.1001/jama.2017.14752

**eFigure 1.** Change in Mean HbA<sub>1c</sub>—Cumulative Distribution Function at Week 26

**eFigure 2.** Sensitivity Analyses

**eFigure 3.** Proportion of Patients With Nausea and Mean Number of Events Over Time

**eFigure 4.** Lipase and Amylase

**eBox 1.** Countries Involved in the Trial

**eBox 2.** Key Exclusion Criteria

**eBox 3.** Predefined Events Types That Were Sent for Blinded Adjudication by an Independent External Committee

**eTable 1.** Additional Efficacy and Safety End Points

**eTable 2.** Efficacy and Safety End Points for Oral Semaglutide Dose Escalation Arms at Week 26

**eTable 3.** Serious Adverse Events by System Organ Class

**eTable 4.** Nausea by Time and Severity

**eTable 5.** Hypoglycemic Events

**eTable 6.** Event Adjudication Committee-Confirmed Cardiovascular Events

**eTable 7.** Event Adjudication Committee-Confirmed Pancreatitis Events

**eAppendix.** List of Investigators

This supplementary material has been provided by the authors to give readers additional information about their work.

eFigure 1. Change in mean HbA<sub>1c</sub> – cumulative distribution function at week 26

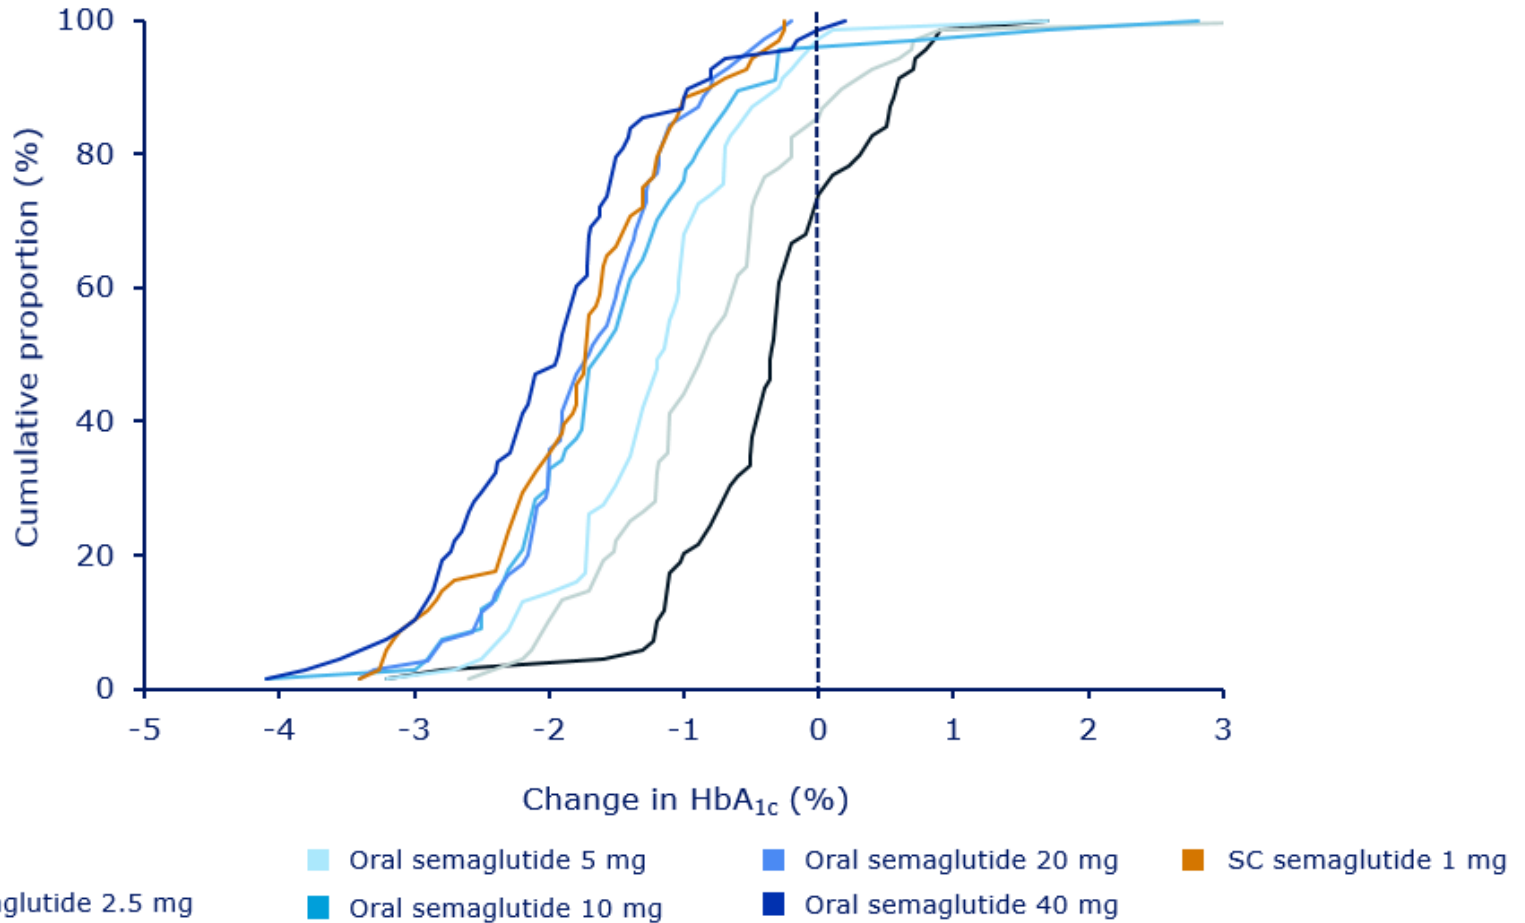

Missing HbA<sub>1c</sub> values are imputed from repeated measures model analysis. SC, subcutaneous

## eFigure 2. Sensitivity analyses

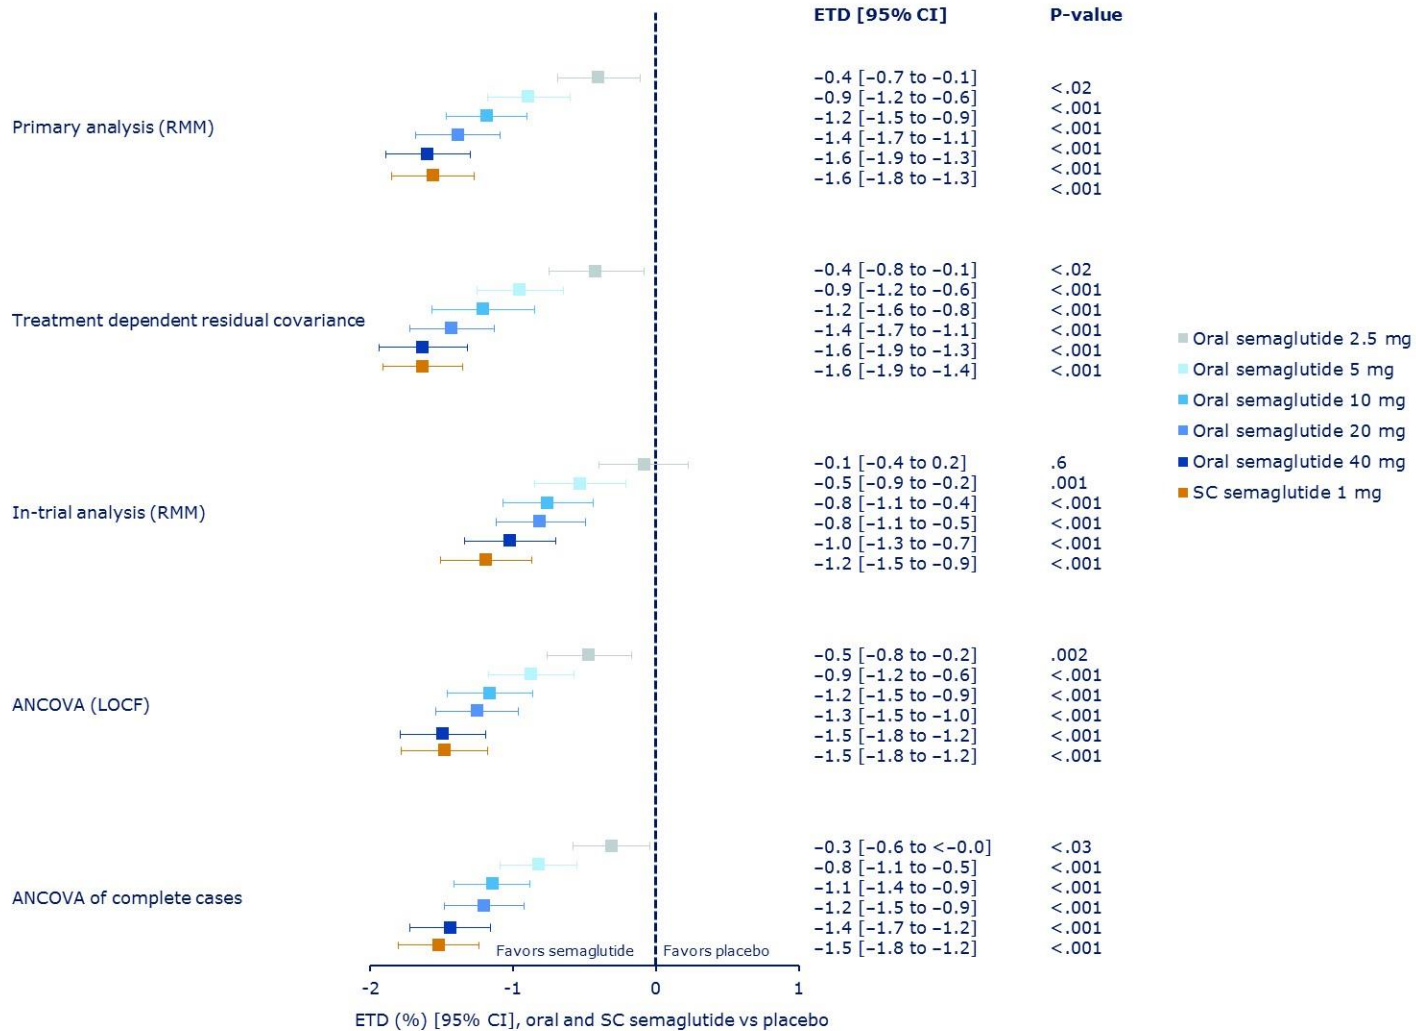

Values are ETDs with 95% CIs (comparing oral and SC semaglutide versus placebo) from a repeated measures model analysis with treatment, stratum, country and baseline value, all nested within visit. The in-trial analysis refers to a repeated measures model based on all scheduled data recorded after randomization regardless of adherence to randomized treatment or initiation of rescue therapy. ANCOVA, analysis of covariance; LOCF, last observation carried forward; ETD, estimated treatment difference; CI, confidence interval; RMM, repeated measures model.

eFigure 3. Proportion of patients with nausea and mean number of events over time

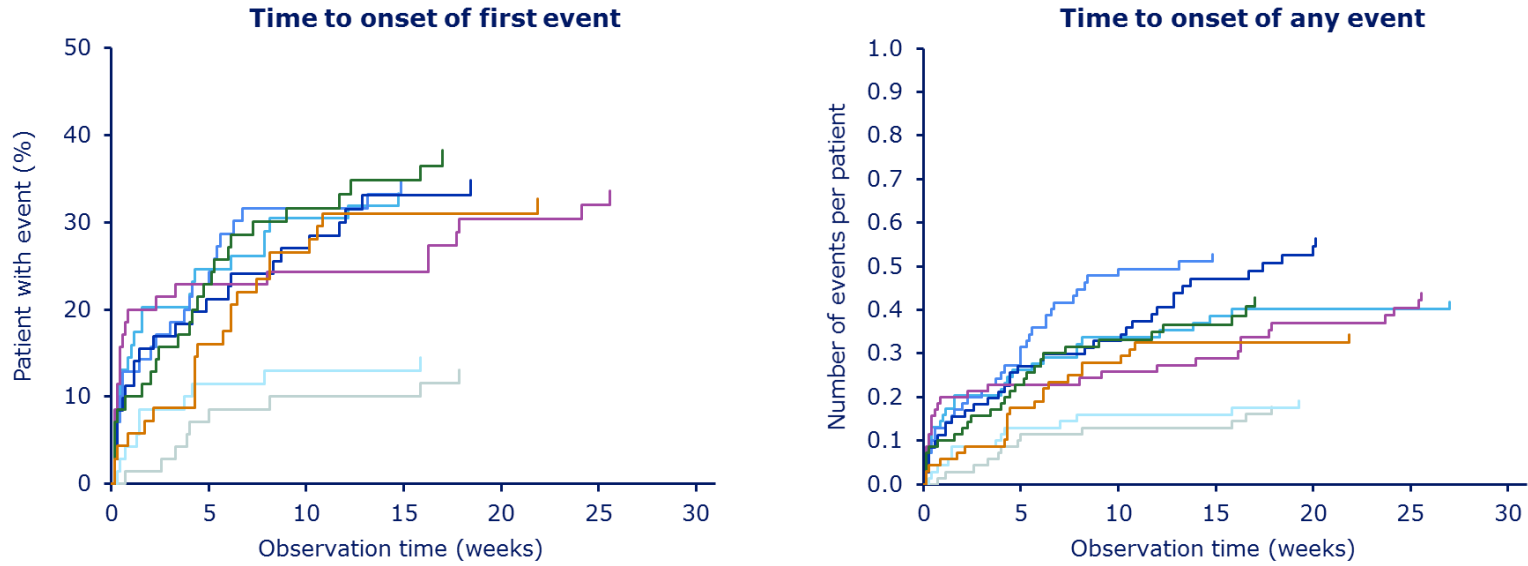

| Week                                          | Number of patients at risk |    |    |    |    |    |    |    |    | Week | Number of patients at risk |    |    |    |    |    |    |    |                | Observation period<br>Days, median (Q1, Q3) |
|-----------------------------------------------|----------------------------|----|----|----|----|----|----|----|----|------|----------------------------|----|----|----|----|----|----|----|----------------|---------------------------------------------|
|                                               | 0                          | 4  | 8  | 12 | 16 | 20 | 24 | 28 | 31 |      | 0                          | 4  | 8  | 12 | 16 | 20 | 24 | 28 | 31             |                                             |
| Placebo                                       | 71                         | 70 | 68 | 67 | 66 | 66 | 65 | 64 | 58 | 71   | 71                         | 69 | 68 | 67 | 67 | 66 | 65 | 59 | 218 (217, 219) |                                             |
| Oral semaglutide 2.5 mg                       | 70                         | 66 | 64 | 59 | 58 | 56 | 56 | 56 | 52 | 70   | 70                         | 70 | 65 | 63 | 62 | 62 | 62 | 56 | 218 (218, 219) |                                             |
| Oral semaglutide 5 mg                         | 70                         | 62 | 59 | 57 | 56 | 56 | 55 | 52 | 48 | 70   | 69                         | 67 | 64 | 64 | 63 | 62 | 59 | 55 | 218 (217, 220) |                                             |
| Oral semaglutide 10 mg                        | 69                         | 55 | 49 | 48 | 45 | 45 | 45 | 45 | 44 | 69   | 68                         | 65 | 63 | 61 | 60 | 60 | 59 | 57 | 218 (218, 220) |                                             |
| Oral semaglutide 20 mg                        | 70                         | 56 | 45 | 44 | 41 | 40 | 38 | 37 | 35 | 70   | 70                         | 65 | 59 | 54 | 52 | 49 | 48 | 46 | 218 (125, 221) |                                             |
| Oral semaglutide 40 mg                        | 71                         | 57 | 52 | 46 | 40 | 38 | 38 | 38 | 36 | 71   | 70                         | 67 | 64 | 58 | 52 | 52 | 49 | 46 | 218 (122, 218) |                                             |
| Oral semaglutide 40 mg 8-week dose escalation | 70                         | 54 | 53 | 51 | 50 | 44 | 43 | 39 | 35 | 70   | 70                         | 68 | 65 | 63 | 60 | 58 | 54 | 48 | 218 (214, 220) |                                             |
| Oral semaglutide 40 mg 2-week dose escalation | 70                         | 58 | 47 | 41 | 38 | 35 | 34 | 34 | 30 | 70   | 70                         | 66 | 56 | 50 | 48 | 46 | 46 | 41 | 216 (93, 219)  |                                             |
| SC semaglutide 1 mg                           | 69                         | 62 | 51 | 46 | 45 | 42 | 41 | 39 | 16 | 69   | 68                         | 67 | 65 | 64 | 59 | 57 | 54 | 27 | 216 (213, 218) |                                             |

Placebo
  Oral semaglutide 10 mg
  Oral semaglutide 40 mg 8-week dose escalation

Oral semaglutide 2.5 mg
  Oral semaglutide 20 mg
  Oral semaglutide 40 mg 2-week dose escalation

Oral semaglutide 5 mg
  Oral semaglutide 40 mg
  SC semaglutide 1 mg

Treatment-emergent events collected from first exposure to the follow-up visit scheduled 5 weeks (+5 day visit window) after final trial product dose. Left panel: Kaplan-Meier estimator. Right panel: mean cumulative function estimator. F, 2-week dose escalation; S, 8-week dose escalation; SC, subcutaneous.

# eFigure 4. Lipase and amylase

## A. Lipase

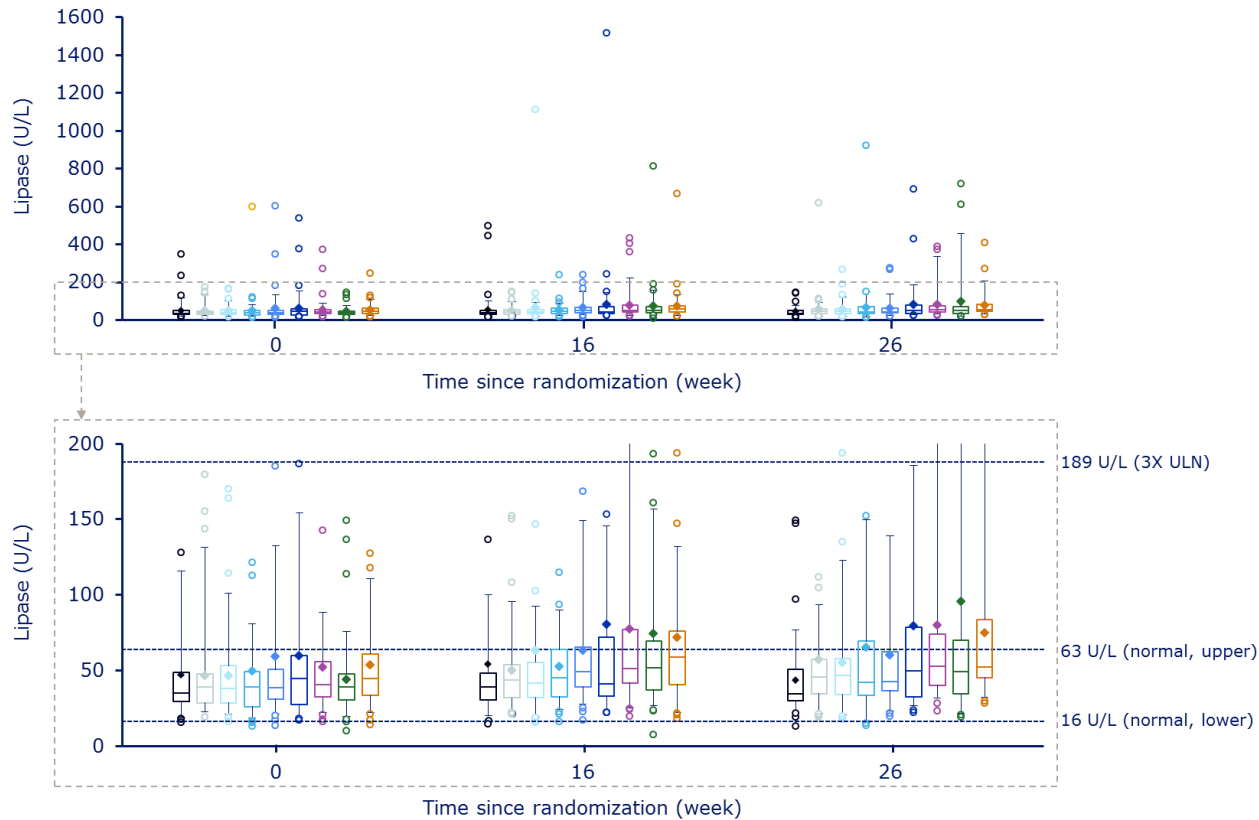

|                                               | Number of patients at risk |    |    |
|-----------------------------------------------|----------------------------|----|----|
| Placebo                                       | 70                         | 68 | 64 |
| Oral semaglutide 2.5 mg                       | 70                         | 65 | 60 |
| Oral semaglutide 5 mg                         | 70                         | 64 | 60 |
| Oral semaglutide 10 mg                        | 69                         | 64 | 59 |
| Oral semaglutide 20 mg                        | 70                         | 66 | 49 |
| Oral semaglutide 40 mg                        | 71                         | 60 | 46 |
| Oral semaglutide 40 mg 8-week dose escalation | 70                         | 61 | 54 |
| Oral semaglutide 40 mg 2-week dose escalation | 69                         | 61 | 42 |
| SC semaglutide 1 mg                           | 69                         | 63 | 49 |

## B. Amylase

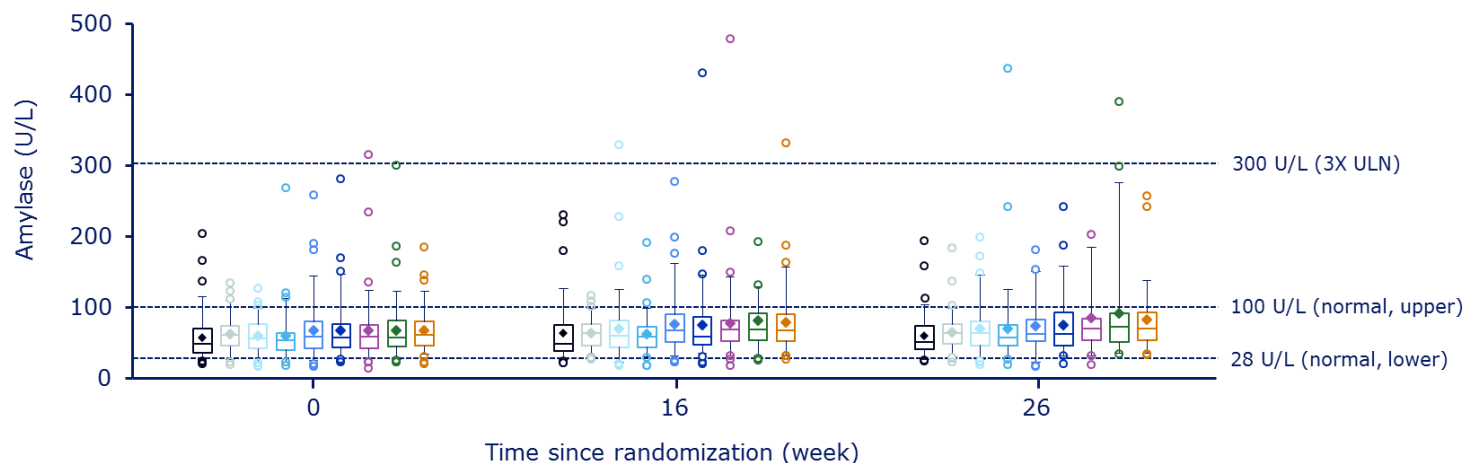

|                                               | Number of patients at risk |    |    |
|-----------------------------------------------|----------------------------|----|----|
| Placebo                                       | 71                         | 68 | 64 |
| Oral semaglutide 2.5 mg                       | 70                         | 65 | 60 |
| Oral semaglutide 5 mg                         | 70                         | 64 | 60 |
| Oral semaglutide 10 mg                        | 69                         | 64 | 59 |
| Oral semaglutide 20 mg                        | 70                         | 66 | 49 |
| Oral semaglutide 40 mg                        | 71                         | 61 | 47 |
| Oral semaglutide 40 mg 8-week dose escalation | 70                         | 61 | 54 |
| Oral semaglutide 40 mg 2-week dose escalation | 70                         | 61 | 42 |
| SC semaglutide 1 mg                           | 70                         | 64 | 49 |

- Placebo
- Oral semaglutide 2.5 mg
- Oral semaglutide 5 mg
- Oral semaglutide 10 mg
- Oral semaglutide 20 mg
- Oral semaglutide 40 mg
- Oral semaglutide 40 mg 8-week dose escalation
- Oral semaglutide 40 mg 2-week dose escalation
- SC semaglutide 1 mg

Observed values from patients in the safety analysis set. Boxes correspond to the 25th, 50th (median) and 75th percentiles, and diamond symbols correspond to the means. Whiskers correspond to the 5th and 95th percentiles and circles correspond to values beyond the 5th and 95th percentiles. Dotted lines indicate normal reference ranges and 3 times upper normal range. SC, subcutaneous; ULN, upper limit of normal range.

## **eBox 1. Countries involved in the trial**

Austria

Bulgaria

Canada

Denmark

Germany

Israel

Italy

Malaysia

Serbia

South Africa

Spain

Sweden

United Kingdom

United States

## **eBox 2. Key exclusion criteria**

Treatment with selected oral medications with a narrow therapeutic window

History of pancreatitis

Chronic malabsorption

History of inflammatory bowel disease

Treatment with glucose lowering agent(s) other than metformin as stated in the inclusion criteria in a period of 90 days before the screening visit

Personal or family history of medullary thyroid carcinoma or multiple endocrine neoplasia syndrome type 2



### **eBox 3. Pre-defined events types that were sent for blinded adjudication by an independent external committee**

Fatal events

Acute coronary syndrome (myocardial infarction, hospitalization for unstable angina)

Cerebrovascular events (stroke, transient ischemic attack)

Coronary revascularization procedure

Heart failure requiring hospital admission

Pancreatitis or clinical suspicion of pancreatitis

Neoplasms

Thyroid disease (if thyroid neoplasm or resulting in thyroidectomy)

**eTable 1. Additional efficacy and safety endpoints**

|                                                      | Overall mean at baseline | Placebo                | Oral semaglutide 2.5 mg | Oral semaglutide 5 mg  | Oral semaglutide 10 mg   | Oral semaglutide 20 mg    | Oral semaglutide 40 mg   | SC semaglutide 1 mg      |
|------------------------------------------------------|--------------------------|------------------------|-------------------------|------------------------|--------------------------|---------------------------|--------------------------|--------------------------|
| <b>Glycemic parameters</b>                           |                          |                        |                         |                        |                          |                           |                          |                          |
| Fasting insulin, pmol/L <sup>a</sup>                 | 110.0                    | 0.9<br>[0.8 to 1.0]    | 0.9<br>[0.8 to 1.1]     | 0.9<br>[0.8 to 1.0]    | 0.9<br>[0.8 to 1.0]      | 0.9<br>[0.8 to 1.1]       | 0.8<br>[0.7 to 0.9]      | 0.7*<br>[0.6 to 0.8]     |
| Fasting glucagon, pg/mL <sup>a</sup>                 | 98.9                     | 1.0<br>[0.9 to 1.1]    | 0.9<br>[0.9 to 1.0]     | 0.9<br>[0.8 to 1.0]    | 0.9<br>[0.9 to 1.0]      | 0.9*<br>[0.8 to 0.9]      | 0.8**<br>[0.8 to 0.9]    | 0.8**<br>[0.8 to 0.9]    |
| Fasting C-peptide nmol/L <sup>a</sup>                | 1.0                      | 1.0<br>[0.9 to 1.1]    | 1.0<br>[1.0 to 1.1]     | 1.1<br>[1.0 to 1.2]    | 1.0<br>[1.0 to 1.1]      | 1.1<br>[1.0 to 1.2]       | 1.0<br>[0.9 to 1.1]      | 0.9<br>[0.9 to 1.0]      |
| HOMA-IR, % <sup>a</sup>                              | 6.2                      | 0.9<br>[0.8 to 1.0]    | 0.8<br>[0.7 to 1.0]     | 0.8<br>[0.7 to 0.9]    | 0.7*<br>[0.6 to 0.8]     | 0.7*<br>[0.6 to 0.8]      | 0.6**<br>[0.5 to 0.6]    | 0.5**<br>[0.4 to 0.6]    |
| HOMA-B, % <sup>a</sup>                               | 55.5                     | 0.9<br>[0.8 to 1.1]    | 1.2*<br>[1.0 to 1.3]    | 1.3**<br>[1.1 to 1.5]  | 1.6**<br>[1.4 to 1.8]    | 1.6**<br>[1.4 to 1.8]     | 1.6**<br>[1.4 to 1.8]    | 1.6**<br>[1.4 to 1.9]    |
| <b>Body measurements</b>                             |                          |                        |                         |                        |                          |                           |                          |                          |
| Body weight, % change <sup>a</sup>                   |                          | -1.4<br>[-2.5 to -0.2] | -2.4<br>[-3.5 to -1.2]  | -2.9<br>[-4.1 to -1.8] | -5.2**<br>[-6.4 to -4.1] | -6.6**<br>[-7.9 to -5.4]  | -7.6**<br>[-8.7 to -6.4] | -7.3**<br>[-8.5 to -6.1] |
| Body weight, ETD % change <sup>a</sup>               |                          |                        | -1.0<br>[-2.7 to 0.6]   | -1.5<br>[-3.2 to 0.1]  | -3.9**<br>[-5.5 to -2.2] | -5.28**<br>[-7.0 to -3.6] | -6.2**<br>[-7.9 to -4.5] | -5.9**<br>[-7.6 to -4.3] |
| Waist circumference, cm <sup>b</sup>                 | 107.4                    | -1.7<br>[-2.9 to -0.4] | -1.8<br>[-3.0 to -0.7]  | -2.2<br>[-3.4 to -1.0] | -4.5**<br>[-5.7 to -3.3] | -4.5*<br>[-5.7 to -3.2]   | -5.8**<br>[-7.0 to -4.5] | -6.2**<br>[-7.4 to -5.0] |
| Patients achieving ≥5% weight loss at week 26, n (%) |                          | 9 (13)                 | 15 (21)                 | 15 (21)                | 38 (56)**                | 45 (64)**                 | 50 (71)**                | 45 (66)**                |
| Patients achieving ≥10% weight loss, n (%)           |                          | 1 (1)                  | 3 (4)                   | 3 (4)                  | 10 (15)                  | 11 (16)                   | 19 (27)                  | 18 (26)                  |
| <b>Fasting blood lipids</b>                          |                          |                        |                         |                        |                          |                           |                          |                          |
| Total cholesterol, mg/dL <sup>a</sup>                | 178.6                    | 1.0<br>[0.9 to 1.0]    | 1.0<br>[1.0 to 1.0]     | 0.9<br>[0.9 to 1.0]    | 1.0<br>[1.0 to 1.0]      | 1.0<br>[0.9 to 1.0]       | 0.9<br>[0.9 to 1.0]      | 0.9<br>[0.9 to 1.0]      |
| LDL, mg/dL <sup>a</sup>                              | 101.7                    | 0.9<br>[0.9 to 1.0]    | 1.0<br>[0.92 to 1.1]    | 0.9<br>[0.8 to 0.9]    | 1.0<br>[0.9 to 1.0]      | 0.9<br>[0.9 to 1.0]       | 0.9<br>[0.8 to 1.0]      | 0.9<br>[0.8 to 1.0]      |
| VLDL, mg/dL <sup>a</sup>                             | 30.4                     | 1.0<br>[0.9 to 1.1]    | 0.9<br>[0.8 to 1.0]     | 1.1<br>[1.0 to 1.2]    | 1.0<br>[0.9 to 1.1]      | 0.9<br>[0.8 to 1.0]       | 0.8*<br>[0.7 to 0.9]     | 0.8*<br>[0.8 to 0.9]     |
| HDL, mg/dL <sup>a</sup>                              | 46.2                     | 1.0<br>[1.0 to 1.1]    | 1.1<br>[1.0 to 1.1]     | 1.0*<br>[0.9 to 1.0]   | 1.0<br>[1.0 to 1.0]      | 1.0<br>[1.0 to 1.0]       | 1.0<br>[1.0 to 1.1]      | 1.0<br>[1.0 to 1.1]      |
| TG, mg/dL <sup>a</sup>                               | 158.8                    | 1.0<br>[0.9 to 1.1]    | 0.9<br>[0.8 to 1.0]     | 1.0<br>[0.9 to 1.1]    | 1.0<br>[0.9 to 1.1]      | 0.9<br>[0.8 to 1.0]       | 0.8*<br>[0.7 to 0.9]     | 0.8*<br>[0.7 to 0.9]     |
| FFA, mmol/L <sup>a</sup>                             | 0.8                      | 1.0<br>[0.9 to 1.1]    | 1.0<br>[0.9 to 1.1]     | 1.0<br>[0.9 to 1.1]    | 1.0<br>[0.9 to 1.1]      | 0.9<br>[0.8 to 1.0]       | 1.0<br>[0.9 to 1.1]      | 0.9*<br>[0.8 to 1.0]     |

|                                                      | Overall mean at baseline | Placebo                | Oral semaglutide 2.5 mg | Oral semaglutide 5 mg  | Oral semaglutide 10 mg   | Oral semaglutide 20 mg | Oral semaglutide 40 mg | SC semaglutide 1 mg    |
|------------------------------------------------------|--------------------------|------------------------|-------------------------|------------------------|--------------------------|------------------------|------------------------|------------------------|
| <b>Patient-reported outcomes</b>                     |                          |                        |                         |                        |                          |                        |                        |                        |
| SF-36 score, physical component summary <sup>b</sup> | 49.1                     | 0.5<br>[-1.1 to 2.1]   | 0.3<br>[-1.2 to 1.8]    | 0.7<br>[-0.7 to 2.2]   | 1.3<br>[-0.1 to 2.7]     | -0.1<br>[-1.6 to 1.3]  | -0.2<br>[-1.6 to 1.3]  | 0.4<br>[-1.1 to 1.8]   |
| SF-36 score, mental component summary <sup>b</sup>   | 51.1                     | 0.5<br>[-1.7 to 2.8]   | -0.0<br>[-2.1 to 2.1]   | 0.5<br>[-1.6 to 2.7]   | -0.0<br>[-2.1 to 2.0]    | -0.9<br>[-3.0 to 1.1]  | -0.2<br>[-2.3 to 1.8]  | -0.6<br>[-2.7 to 1.5]  |
| <b>Safety</b>                                        |                          |                        |                         |                        |                          |                        |                        |                        |
| Heart rate, bpm <sup>d</sup>                         | 73.5                     | -4.0<br>[-5.9 to -2.1] | -1.7<br>[-3.7 to 0.2]   | 0.6**<br>[-1.4 to 2.6] | 2.9**<br>[0.9 to 4.8]    | 3.0**<br>[0.8 to 5.1]  | 1.9**<br>[-0.2 to 4.1] | 2.6**<br>[0.5 to 4.8]  |
| Systolic blood pressure, mmHg <sup>b</sup>           | 134.0                    | -2.7<br>[-5.7 to 0.4]  | -5.4<br>[-8.5 to -2.3]  | -6.6<br>[-9.8 to -3.5] | -7.8*<br>[-10.9 to -4.6] | -6.2<br>[-9.6 to -2.7] | -6.1<br>[-9.5 to -2.6] | -5.7<br>[-9.2 to -2.2] |
| Diastolic blood pressure, mmHg <sup>b</sup>          | 81.1                     | -2.4<br>[-4.3 to -0.5] | -2.5<br>[-4.4 to -0.5]  | -2.2<br>[-4.1 to -0.2] | -3.1<br>[-5.1 to -1.2]   | -2.8<br>[-4.9 to -0.6] | -0.3<br>[-2.4 to 1.9]  | -0.4<br>[-2.6 to 1.7]  |

\*P<.05; \*\*P<.001, all versus placebo. Full analysis set. Overall mean at baseline includes the dose escalation arms. <sup>a</sup>Values are geometric mean at baseline and ratio-to-baseline at week 26 [95% CI]; <sup>b</sup>Values are mean at baseline and mean change from baseline at week 26 [95% CI]. Ratios-to-baseline and changes from baseline are estimated means from a repeated measures model analysis with treatment, stratum, country and baseline value all nested within visit. With SF-36, a higher score (0–100) was related to a better self-perceived quality of life.

bpm, beats per minute; ETD, estimated treatment difference; FFA, free fatty acids; HDL, high-density lipoprotein cholesterol; HOMA-IR/B, homeostasis model assessment-insulin resistance/beta-cell function; LDL, low-density lipoprotein cholesterol; SF-36, 36-item short-form health survey; TG, triglycerides; VLDL, very low-density lipoprotein cholesterol. SI conversion factors: to convert insulin values to pmol/L, multiply by 6.945; glucagon values = ng/L; total cholesterol, HDL cholesterol, and LDL cholesterol values to mmol/L, multiply by 0.0259; triglycerides to mmol/L, multiply by 0.0113; free fatty acids to mmol/L, multiply by 0.0355.

**eTable 2. Efficacy and safety endpoints for oral semaglutide dose escalation arms at week 26**

|                                                        | Overall mean at baseline | Placebo                | Oral semaglutide 40 mg (Standard 4-week dose escalation) | Oral semaglutide 40 mg (8-week dose escalation) | Oral semaglutide 40 mg (2-week dose escalation) | SC semaglutide 1 mg       |
|--------------------------------------------------------|--------------------------|------------------------|----------------------------------------------------------|-------------------------------------------------|-------------------------------------------------|---------------------------|
| <b>Glycemic parameters</b>                             |                          |                        |                                                          |                                                 |                                                 |                           |
| HbA <sub>1c</sub> , % <sup>a</sup>                     | 7.9                      | -0.3<br>[-0.5 to -0.1] | -1.9**<br>[-2.2 to -1.7]                                 | -1.7**<br>[-1.9 to -1.5]                        | -1.7**<br>[-1.9 to -1.4]                        | -1.9**<br>[-2.1 to -1.7]  |
| HbA <sub>1c</sub> , ETD % <sup>a</sup>                 | -                        |                        | -1.6**<br>[-1.9 to -1.3]                                 | -1.4**<br>[-1.7 to -1.1]                        | -1.3**<br>[-1.6 to -1.0]                        | -1.6**<br>[-1.8 to -1.3]  |
| Patients achieving HbA <sub>1c</sub> target <7%, N (%) | -                        | 19 (28)                | 61 (90)**                                                | 58 (87)**                                       | 57 (88)**                                       | 63 (93)**                 |
| FPG, mg/dL <sup>a,b</sup>                              | 170.2                    | -1<br>[-9.6 to 7.5]    | -51**<br>[-60.0 to -42.4]                                | -54**<br>[-62.2 to -45.4]                       | -46**<br>[-54.8 to -36.4]                       | -56**<br>[-65.3 to -47.4] |
| Fasting insulin, pmol/ <sup>c</sup>                    | 110.0                    | 0.9<br>[0.8 to 1.0]    | 0.8<br>[0.7 to 0.9]                                      | 0.9<br>[0.8 to 1.0]                             | 0.8<br>[0.7 to 0.9]                             | 0.7*<br>[0.6 to 0.8]      |
| Fasting glucagon, pg/mL <sup>c</sup>                   | 98.9                     | 1.0<br>[0.9 to 1.1]    | 0.8**<br>[0.8 to 0.9]                                    | 0.9<br>[0.9 to 1.0]                             | 0.9*<br>[0.8 to 1.0]                            | 0.8**<br>[0.8 to 0.9]     |
| Fasting C-peptide nmol/L <sup>c</sup>                  | 1.0                      | 1.0<br>[0.9 to 1.1]    | 1.0<br>[0.9 to 1.1]                                      | 1.1<br>[1.0 to 1.2]                             | 1.0<br>[0.9 to 1.1]                             | 0.9<br>[0.9 to 1.0]       |
| HOMA-IR, % <sup>c</sup>                                | 6.2                      | 0.9<br>[0.8 to 1.0]    | 0.6**<br>[0.5 to 0.6]                                    | 0.6**<br>[0.5 to 0.7]                           | 0.6**<br>[0.5 to 0.7]                           | 0.5**<br>[0.4 to 0.6]     |
| HOMA-B, % <sup>c</sup>                                 | 55.5                     | 0.9<br>[0.8 to 1.1]    | 1.6**<br>[1.4 to 1.8]                                    | 1.9**<br>[1.6 to 2.2]                           | 1.4**<br>[1.2 to 1.7]                           | 1.6**<br>[1.4 to 1.9]     |
| <b>Body measurements</b>                               |                          |                        |                                                          |                                                 |                                                 |                           |
| Body weight, kg <sup>a</sup>                           | 92.3                     | -1.2<br>[-2.3 to -0.1] | -6.9**<br>[-8.0 to -5.8]                                 | -6.1**<br>[-7.1 to -5.0]                        | -8.2**<br>[-9.3 to -7.0]                        | -6.4**<br>[-7.5 to -5.3]  |
| Body weight, % change <sup>a</sup>                     | -                        | -1.4<br>[-2.5 to -0.2] | -7.6**<br>[-8.7 to -6.4]                                 | -6.7**<br>[-7.8 to -5.5]                        | -9.2**<br>[-10.4 to -7.9]                       | -7.3**<br>[-8.5 to -6.1]  |
| Body weight, ETD % change <sup>a</sup>                 | -                        |                        | -6.2**<br>[-7.9 to -4.5]                                 | -5.3**<br>[-7.0 to -3.7]                        | -7.8**<br>[-9.5 to -6.1]                        | -5.9**<br>[-7.6 to -4.3]  |
| Waist circumference, cm <sup>a</sup>                   | 107.4                    | -1.7<br>[-2.9 to -0.4] | -5.8**<br>[-7.0 to -4.5]                                 | -5.1**<br>[-6.3 to -3.9]                        | -6.3**<br>[-7.5 to -5.0]                        | -6.2**<br>[-7.4 to -5.0]  |
| Patients achieving ≥5% weight loss, n (%)              | -                        | 9 (13)                 | 50 (71)**                                                | 41 (59)**                                       | 55 (82)**                                       | 45 (66)**                 |
| Patients achieving ≥10% weight loss, n (%)             | -                        | 1 (1)                  | 19 (27)                                                  | 12 (17)                                         | 27 (40)                                         | 18 (26)                   |

|                                                  | Overall mean at baseline | Placebo                | Oral semaglutide 40 mg (Standard 4-week dose escalation) | Oral semaglutide 40 mg (8-week dose escalation) | Oral semaglutide 40 mg (2-week dose escalation) | SC semaglutide 1 mg    |
|--------------------------------------------------|--------------------------|------------------------|----------------------------------------------------------|-------------------------------------------------|-------------------------------------------------|------------------------|
| <b>Lipid parameters</b>                          |                          |                        |                                                          |                                                 |                                                 |                        |
| Total cholesterol, mg/dL <sup>c</sup>            | 178.6                    | 1.0<br>[0.9 to 1.0]    | 0.9<br>[0.9 to 1.0]                                      | 1.0<br>[0.9 to 1.0]                             | 0.9<br>[0.9 to 1.0]                             | 0.9<br>[0.9 to 1.0]    |
| LDL, mg/dL <sup>c</sup>                          | 101.7                    | 0.9<br>[0.9 to 1.0]    | 0.9<br>[0.8 to 1.0]                                      | 0.9<br>[0.9 to 1.0]                             | 0.9<br>[0.9 to 1.0]                             | 0.9<br>[0.8 to 1.0]    |
| VLDL, mg/dL <sup>c</sup>                         | 30.4                     | 1.0<br>[0.9 to 1.1]    | 0.8*<br>[0.7 to 0.9]                                     | 0.9<br>[0.8 to 0.9]                             | 0.8<br>[0.8 to 0.9]                             | 0.8*<br>[0.8 to 0.9]   |
| HDL, mg/dL <sup>c</sup>                          | 46.2                     | 1.0<br>[1.0 to 1.1]    | 1.0<br>[1.0 to 1.1]                                      | 1.0<br>[1.0 to 1.1]                             | 1.0<br>[1.0 to 1.1]                             | 1.0<br>[1.0 to 1.1]    |
| TG, mg/dL <sup>c</sup>                           | 158.8                    | 1.0<br>[0.9 to 1.1]    | 0.8*<br>[0.7 to 0.9]                                     | 0.8<br>[0.8 to 0.9]                             | 0.8<br>[0.7 to 0.9]                             | 0.8*<br>[0.7 to 0.9]   |
| FFA, mmol/L <sup>c</sup>                         | 0.8                      | 1.0<br>[0.9 to 1.1]    | 1.0<br>[0.9 to 1.1]                                      | 0.9*<br>[0.8 to 1.0]                            | 0.9*<br>[0.8 to 1.0]                            | 0.9*<br>[0.8 to 1.0]   |
| <b>Patient-reported outcomes</b>                 |                          |                        |                                                          |                                                 |                                                 |                        |
| SF-36 score, overall physical score <sup>a</sup> | 49.1                     | 0.5<br>[-1.1 to 2.1]   | -0.2<br>[-1.6 to 1.3]                                    | -0.3<br>[-1.8 to 1.1]                           | -0.4<br>[-1.8 to 1.1]                           | 0.4<br>[-1.1 to 1.8]   |
| SF-36 score, overall mental score <sup>a</sup>   | 51.1                     | 0.5<br>[-1.7 to 2.8]   | -0.2<br>[-2.3 to 1.8]                                    | 0.5<br>[-1.6 to 2.6]                            | -1.1<br>[-3.2 to 1.0]                           | -0.6<br>[-2.7 to 1.5]  |
| <b>Safety</b>                                    |                          |                        |                                                          |                                                 |                                                 |                        |
| Heart rate, bpm <sup>a</sup>                     | 73.5                     | -4.0<br>[-5.9 to -2.1] | 1.9**<br>[-0.2 to 4.1]                                   | 2.3**<br>[0.2 to 4.3]                           | 1.6**<br>[-0.6 to 3.8]                          | 2.6**<br>[0.5 to 4.8]  |
| Systolic blood pressure, mmHg <sup>a</sup>       | 134.0                    | -2.7<br>[-5.7 to 0.4]  | -6.1<br>[-9.5 to -2.6]                                   | -7.1<br>[-10.3 to -3.8]                         | -7.2<br>[-10.8 to -3.6]                         | -5.7<br>[-9.2 to -2.2] |
| Diastolic blood pressure, mmHg <sup>a</sup>      | 81.1                     | -2.4<br>[-4.3 to -0.5] | -0.3<br>[-2.4 to 1.9]                                    | -2.7<br>[-4.8 to -0.7]                          | -1.9<br>[-4.1 to 0.3]                           | -0.4<br>[-2.6 to 1.7]  |

\*P<.05; \*\*P<.001, all versus placebo. Full analysis set. Overall mean at baseline includes the dose escalation arms. <sup>a</sup>Values are mean at baseline and mean change from baseline at week 26 [95% CI]; <sup>b</sup>mmol/L = mg/dL/18; <sup>c</sup>Values are geometric mean at baseline and ratio-to-baseline at week 26 [95% CI]. Ratios-to-baseline and changes from baseline are estimated means from a repeated measures model analysis with treatment, stratum, country and baseline value all nested within visit. With SF-36, a higher score (0–100) was indicative of a better self-perceived quality of life.

bpm, beats per minute; ETD, estimated treatment difference; FFA, free fatty acids; FPG, fasting plasma glucose; HbA<sub>1c</sub>, glycated hemoglobin; HDL, high-density lipoprotein cholesterol; HOMA-IR/B, homeostasis model assessment-insulin resistance/beta-cell function; LDL, low-density lipoprotein cholesterol; SF-36, 36-item short-form health survey; TG, triglycerides; VLDL, very low-density lipoprotein cholesterol.

**eTable 3. Serious adverse events by system organ class**

|                                                      | <b>Placebo</b> | <b>Oral semaglutide 2.5 mg</b> | <b>Oral semaglutide 5 mg</b> | <b>Oral semaglutide 10 mg</b> | <b>Oral semaglutide 20 mg</b> | <b>Oral semaglutide 40 mg</b> | <b>Oral semaglutide 40 mg (8-week dose escalation)</b> | <b>Oral semaglutide 40 mg (2-week dose escalation)</b> | <b>SC semaglutide 1 mg</b> |
|------------------------------------------------------|----------------|--------------------------------|------------------------------|-------------------------------|-------------------------------|-------------------------------|--------------------------------------------------------|--------------------------------------------------------|----------------------------|
|                                                      | <b>N (%) E</b> | <b>N (%) E</b>                 | <b>N (%) E</b>               | <b>N (%) E</b>                | <b>N (%) E</b>                | <b>N (%) E</b>                | <b>N (%) E</b>                                         | <b>N (%) E</b>                                         | <b>N (%) E</b>             |
| Number of patients                                   | 71             | 70                             | 70                           | 69                            | 70                            | 71                            | 70                                                     | 70                                                     | 69                         |
| Observation time (patient-years)                     | 40.5           | 38.9                           | 38.4                         | 37.8                          | 34.5                          | 35.5                          | 37.8                                                   | 32.9                                                   | 37.0                       |
| Events                                               | 5 (7) 8        | 1 (1) 1                        | 2 (3) 2                      | 2 (3) 5                       | -                             | 1 (1) 1                       | 3 (4) 3                                                | 5 (7) 9                                                | 2 (3) 2                    |
| Infections and infestations                          | 1 (1) 1        | 1 (1) 1                        | -                            | -                             | -                             | 1 (1) 1                       | 1 (1) 1                                                | 1 (1) 1                                                | -                          |
| Gastrointestinal disorders                           | -              | -                              | -                            | 1 (1) 2                       | -                             | -                             | -                                                      | 1 (1) 3                                                | 1 (1) 1                    |
| Renal and urinary disorders                          | 1 (1) 1        | -                              | -                            | 1 (1) 1                       | -                             | -                             | -                                                      | 1 (1) 1                                                | -                          |
| Injury, poisoning and procedural complications       | 1 (1) 1        | -                              | -                            | 1 (1) 2                       | -                             | -                             | -                                                      | -                                                      | -                          |
| Metabolism and nutrition disorders                   | -              | -                              | -                            | -                             | -                             | -                             | -                                                      | 2 (3) 2                                                | -                          |
| Musculoskeletal and connective tissue disorders      | 1 (1) 1        | -                              | -                            | -                             | -                             | -                             | -                                                      | 1 (1) 1                                                | -                          |
| Nervous system disorders                             | 1 (1) 1        | -                              | -                            | -                             | -                             | -                             | 1 (1) 1                                                | -                                                      | -                          |
| Cardiac disorders                                    | 1 (1) 2        | -                              | -                            | -                             | -                             | -                             | -                                                      | -                                                      | -                          |
| Eye disorders                                        | -              | -                              | -                            | -                             | -                             | -                             | -                                                      | 1 (1) 1                                                | -                          |
| General disorders and administration site conditions | -              | -                              | -                            | -                             | -                             | -                             | 1 (1) 1                                                | -                                                      | -                          |
| Hepatobiliary disorders                              | -              | -                              | 1 (1) 1                      | -                             | -                             | -                             | -                                                      | -                                                      | -                          |
| Investigations                                       | -              | -                              | 1 (1) 1                      | -                             | -                             | -                             | -                                                      | -                                                      | -                          |
| Neoplasms <sup>a</sup>                               | 1 (1) 1        | -                              | -                            | -                             | -                             | -                             | -                                                      | -                                                      | -                          |
| Skin + subcutaneous disorders                        | -              | -                              | -                            | -                             | -                             | -                             | -                                                      | -                                                      | 1 (1) 1                    |

Safety analysis set; <sup>a</sup>benign, malignant and unspecified (including cysts and polyps). A serious adverse event (SAE) was defined as an experience that at any dose results in any of the following: death; a life-threatening experience, in-patient hospitalisation or prolongation of existing hospitalisation; a persistent or significant disability or incapacity; a congenital anomaly or birth defect; or where medical judgement deems that medical or surgical intervention is necessary to prevent one of the outcomes listed in this definition of SAE. -, no events reported; E, number of events; SC, subcutaneous.

**eTable 4. Nausea by time and severity**

|                                               | N  | Nausea AEs, N (%) |           |         |           |
|-----------------------------------------------|----|-------------------|-----------|---------|-----------|
|                                               |    | Mild              | Moderate  | Severe  | Total     |
| Placebo                                       | 71 | 1 (1.4)           | 0 (0)     | 0 (0)   | 1 (1.4)   |
| Oral semaglutide 2.5 mg                       | 70 | 8 (11.4)          | 0 (0)     | 1 (1.4) | 9 (12.9)  |
| Oral semaglutide 5 mg                         | 70 | 10 (14.3)         | 0 (0)     | 0 (0)   | 10 (14.3) |
| Oral semaglutide 10 mg                        | 69 | 17 (24.6)         | 7 (10.1)  | 2 (2.9) | 23 (33.3) |
| Oral semaglutide 20 mg                        | 70 | 16 (22.9)         | 11 (15.7) | 3 (4.3) | 24 (34.3) |
| Oral semaglutide 40 mg                        | 71 | 12 (22.5)         | 11 (15.5) | 2 (2.8) | 24 (33.8) |
| Oral semaglutide 40 mg 8-week dose escalation | 70 | 16 (22.9)         | 6 (8.6)   | 2 (2.9) | 23 (32.9) |
| Oral semaglutide 40 mg 2-week dose escalation | 70 | 16 (22.9)         | 9 (12.9)  | 1 (1.4) | 26 (37.1) |
| SC semaglutide 1 mg                           | 69 | 15 (21.7)         | 6 (8.7)   | 1 (1.4) | 22 (31.9) |

Treatment-emergent events collected from first exposure to the follow-up visit scheduled 5 weeks (+5 day visit window) after final trial product dose. For each treatment, the total incidence at a given day is grouped by adverse event severity. The highest severity experienced by each patient is shown. SC, subcutaneous.

**eTable 5. Hypoglycemic events**

|                                     | Placebo |    | Oral semaglutide 2.5 mg |    | Oral semaglutide 5 mg |    | Oral semaglutide 10 mg |    | Oral semaglutide 20 mg |    | Oral semaglutide 40 mg |   | Oral semaglutide 40 mg (8-week dose escalation) |    | Oral semaglutide 40 mg (2-week dose escalation) |    | SC semaglutide 1 mg |    |
|-------------------------------------|---------|----|-------------------------|----|-----------------------|----|------------------------|----|------------------------|----|------------------------|---|-------------------------------------------------|----|-------------------------------------------------|----|---------------------|----|
|                                     | N       | E  | N                       | E  | N                     | E  | N                      | E  | N                      | E  | N                      | E | N                                               | E  | N                                               | E  | N                   | E  |
| Number of patients                  | 71      |    | 70                      |    | 70                    |    | 69                     |    | 70                     |    | 71                     |   | 70                                              |    | 70                                              |    | 69                  |    |
| Severe or BG-confirmed <sup>a</sup> | 2       | 3  | 2                       | 4  | 1                     | 3  | 3                      | 6  | 1                      | 1  | 1                      | 1 | 3                                               | 3  | 1                                               | 1  | 4                   | 4  |
| ADA classified <sup>b</sup>         | 8       | 20 | 8                       | 14 | 6                     | 18 | 6                      | 32 | 16                     | 26 | 6                      | 8 | 12                                              | 26 | 9                                               | 14 | 12                  | 16 |
| Severe <sup>c</sup>                 | 0       | 0  | 0                       | 0  | 0                     | 0  | 0                      | 0  | 0                      | 0  | 0                      | 0 | 0                                               | 0  | 1                                               | 1  | 1                   | 1  |

<sup>a</sup>'Severe or BG-confirmed' hypoglycemic episodes are defined as severe by ADA classification<sup>c</sup> or BG-confirmed with a plasma glucose value of <56 mg/dL (<3.1 mmol/L) with/without symptoms consistent with hypoglycemia; <sup>b</sup>ADA classified, ≤70 mg/dL (≤3.9 mmol/L); <sup>c</sup>ADA-classified 'severe' hypoglycemia is an episode requiring the assistance of another person to actively administer carbohydrate, glucagon, or take other corrective actions.

ADA, American Diabetes Association; BG, blood glucose; E, number of events; SC, subcutaneous.



**eTable 6. Event adjudication committee-confirmed cardiovascular events**

| Treatment                                       | Patient characteristics (Sex/age [years]/BMI [kg/m <sup>2</sup> ]) | Confirmed diagnosis        | Treatment-emergent (Yes/No) | Trial day of event         | Serious adverse event (Yes/No) | Outcome                 |
|-------------------------------------------------|--------------------------------------------------------------------|----------------------------|-----------------------------|----------------------------|--------------------------------|-------------------------|
| Placebo                                         | Male/46/39.7                                                       | Ischemic stroke            | Yes                         | 104                        | Yes                            | Recovered with sequelae |
|                                                 | Male/64/35.3                                                       | Silent MI                  | Yes                         | 183                        | No                             | Recovered               |
| Oral semaglutide 10 mg                          | Female/58/31.8                                                     | Silent MI                  | Yes                         | Not available <sup>a</sup> | Not available <sup>a</sup>     |                         |
| Oral semaglutide 40 mg (8-week dose escalation) | Female/64/31.4                                                     | Transient ischemic attack  | Yes                         | 133                        | Yes                            | Recovered               |
|                                                 | Female/29/35.6                                                     | Acute MI                   | No                          | 270                        | Yes                            | Recovered               |
|                                                 |                                                                    | Coronary revascularization | No                          | 271                        | Yes                            | Recovered               |

In-trial adverse events from the safety analysis set. Treatment-emergent adverse events include events that are collected from first exposure to the follow-up visit scheduled 5 weeks (+5 day visit window) after final trial product dose. <sup>a</sup>Not reported as an adverse event by the trial site. A serious adverse event (SAE) was defined as an experience that at any dose results in any of the following: death; a life-threatening experience, in-patient hospitalisation or prolongation of existing hospitalisation; a persistent or significant disability or incapacity; a congenital anomaly or birth defect; or where medical judgement deems that medical or surgical intervention is necessary to prevent one of the outcomes listed in this definition of SAE. The non-serious CV event reported in the placebo arm was a silent MI based on an ECG recording only and therefore not considered a serious adverse event using the classification described above. BMI, body-mass index; MI, myocardial infarction.

**eTable 7. Event adjudication committee-confirmed pancreatitis events**

| Treatment                     | Patient characteristics (Sex/age [years]/BMI [kg/m <sup>2</sup> ]) | Trial day of event | Severity <sup>a</sup> | Serious adverse event (Yes/No) | Diagnostic criteria fulfilled                  | Imaging                               | Gallstones (Yes/No) | Elevated ALT (Yes/No)                      |
|-------------------------------|--------------------------------------------------------------------|--------------------|-----------------------|--------------------------------|------------------------------------------------|---------------------------------------|---------------------|--------------------------------------------|
| Oral semaglutide 20 mg        | Female/58/36.7                                                     | 66                 | Mild to moderate      | No                             | Abdominal pain, elevated amylase and/or lipase | Unknown                               | No                  | Yes (both ALT and AST already at baseline) |
| Oral semaglutide 40 mg        | Male/47/39.7                                                       | 184                | Moderate              | No                             | Abdominal pain, elevated amylase and/or lipase | No abnormal findings; pancreas normal | No                  | No                                         |
| Subcutaneous semaglutide 1 mg | Male/58/30.0                                                       | 180                | Mild to moderate      | No                             | Abdominal pain, elevated amylase and/or lipase | No abnormal findings; pancreas normal | No                  | No                                         |

<sup>a</sup>Based on investigator assessment. A serious adverse event (SAE) was defined as an experience that at any dose results in any of the following: death; a life-threatening experience, in-patient hospitalisation or prolongation of existing hospitalisation; a persistent or significant disability or incapacity; a congenital anomaly or birth defect; or where medical judgement deems that medical or surgical intervention is necessary to prevent one of the outcomes listed in this definition of SAE. None of the pancreatitis events fulfilled this criteria and are therefore not considered to be serious adverse events. ALT, alanine transaminase; AST, aspartate aminotransferase; BMI, body-mass index.

## eAppendix. List of Investigators

**Austria:** Thomas R. Pieber, LKH-Univ. Klinikum Graz, Klin. Abteilung für Endokrinologie und Stoffwechsel, Graz; Ursula Hanusch, Zentrum für klinische Studien, Millergasse 7, Wien; Claudia Francesconi, Gesundheitszentrum Wien Mitte, Vienna; Rudolf Prager, KH Hietzing mit Neurologischem Zentrum Rosenhügel, Vienna; Evelyn Fließner-Görzer, Stainz; Karmen Elcic-Mihaljevic, Riemergasse 10/21, Vienna. **Bulgaria:** Tsvetalina Tankova, USHATE “Akad. Ivan Penchev”, Clinic of Diabetology; Sofia; Zdravko Kamenov, UMHAT “Aleksandrovska”, Clinic of Endocrinology and Metabolic Diseases; Sofia; Plamen Popivanov, UMHAT “Aleksandrovska”, Department of Clinical Densitometry and Bone Metabolic Diseases; Sofia. **Canada:** Jean-Pierre Arseneau, Maritime Medical Research Center, New Brunswick; Anthony Dowell, Dynamik Research Inc., Québec ; Daniel A. Landry, G.A. Research Associates Ltd., New Brunswick; James Lane, Stayner Medical Clinic, Ontario; Ben Lasko, Manna Research Inc., Ontario; Vikas Pandith, Aviva Clinical Trial Group Inc., Ontario. **Denmark:** Tina Vilsbøll, Medicinsk afdeling F Diabetologisk Forskningsenhed, Gentofte Hospital, Københavns Universitet, Hellerup; Søren Tang Knudsen, Medicinsk Endokrinologisk afd. MEA, Århus; Klaus Levin, Endokrinologisk sektion, Medicinsk afdeling, OUH Svendborg Sygehus, Svendbor; Jeppe Gram, Sydvestjysk Sygehus Esbjerg, Medicinsk ambulatorium, Esbjerg; Anna Pietraszek, Ålborg Sygehus Endokrinologisk, Ålborg; Ulrik Pedersen-Bjergaard, Kardiologisk, Nefrologisk og Endokrinologisk afdeling H, Hillerød Hospital, Hillerød. **Germany:** Andreas Hagenow, Zentrum für Klinische Studien Südbrandenburg GmbH, Falkensee; Armin Sammler, Zum Grühlingsstollen, Friedrichsthal; Thomas Segiet, Hilgardstraße 30, Speye; Alexander Segner, Hauptstr. 98, 66386 St. Ingbert; Ulrich Wendisch, Gemeinschaftspraxis für Innere Medizin Beselerstr. 2a, Hamburg; Ludger Rose, Institut für Diabetesforschung GmbH in Münster im Franziskus Carré, Münster; Thomas Behnke, Zentrum für Klinische Studien Neuwied, Neuwied. **Israel:** Naim Shehadeh, Department of Pediatrics. A Rambam Medical Center, Haifa; Julio Wainstein, Diabetes Clinic, Wolfson Medical Center and Clinical Research Center, Herzliya Medical Center, Herzliya, Holon; Ilana Harman-Boehm, Diabetes Clinic, Soroka Medical Center, BeerSheva; Josef Cohen, Maccabi Health Care Services, Diabetes Institute, Rishon Le Zion; Victor Vishlitzky, Clinical Research Unit, Meir Medical Center, Kfar-Saba; Ofri Mosenzon, Diabetes Clinic, Hadassah Ein Kerem MC, Jerusalem. **Italy:** Davide Lauro, Fondazione PTV “Policlinico Tor Vergata”, Centro di riferimento per il Diabete di tipo II, Roma; Piermarco Piatti, Ospedale San Raffaele Palazzina DiMeR Ambulatorio CardioDiabete, Milan; Sebastiano Filetti, Policlinico Universitario “Umberto I”, Dipartimento di Medicina Interna e Specialità Mediche, UOC di Medicina Interna G., Roma; Enzo Bonora, AOU Integrata di Verona Ospedale Civile Maggiore (Borgo Trento), UO di Endocrinologia e Malattie Metaboliche, Verona; Roberto Vettor, Azienda Ospedaliera di Padova, U.O. Clinica Medica 3, Padova. **Malaysia:** Chooi Kheng Chiew, Pusat Penyelidikan Klinikal (CRC), Hospital Seri, Manjung,, Perak; Paranthaman Vengadasalam, Klinik Kesihatan, Perak; Norhayati Yahaya, Clinical Research Centre (CRC), Tingkat 1, Hospital Raja Perempuan Zainab II, Kelantan; Malik Mumtaz, Island Hospital, 308, Endocrine Clinic, Penang. **Serbia:** Nebojsa Lalic, Clinical Centre of Serbia, Endocrinology, Diabetes and Metabolism Disorders Clinic, Belgrade; Dragan Micic, Clinical Centre of Serbia, Endocrinology, Diabetes and Metabolism Disorders Clinic, Belgrade; Katarina Lalic, Clinical Centre of Serbia, Endocrinology, Diabetes and Metabolism Disorders Clinic, Belgrade. **South Africa:** S Bhana, Johannesburg; D Lakha, Lenasia South; G Podgorski, Greenacres Hospital, Port Elizabeth. **Spain:** Pedro Mezquita, Clínica San Pedro, Servicio de Endocrinología, Almería; Carmen De la Cuesta, Clínica Nuevas Tecnologías en Endocrinología y Nutrición, Avda. Sevilla; Francisco Merino, Hospital La Fe, Servicio de Endocrinología y Nutrición, Área de Técnicas, Valencia; Mercedes Rigla, Hospital Parc Taulí, Servicio de Endocrinología y Nutrición, Edificio Taulí – Hospital de Sabadell, Sabadell; Margarita Rivas, Hospital Infanta Luisa, Consultas Externas Servicio de Endocrinología, Sevilla. **Sweden:** Johan Jendle, Endokrin & Diabetescentrum Centralsjukhuset, Karlsta; Ewa Jasinska, Clinical Research Support, CRS, S-huset, Universitetssjukhuset i Örebro, Örebro; Ulrik Mathiesen, Metabola enheten

Medicinkliniken, Oskarshamns sjukhus, Oskarshamn; Torbjörn Lindström, CTC Clinical Trial Consultants AB, Linköping. **UK:** Mark Blagden, Research Office, Ashgate Medical Practice, Derbyshire; Melanie Davies, Leicester Diabetes Centre (Broadleaf), Leicester General Hospital, Leicester; Roy Harper, Diabetes Advice Centre, AE Link Corridor, Ulster Hospital, Belfast; Frank Joseph, Diabetes Centre, Countess of Chester Hospital, Chester; Tom Maxwell, Little Common Surgery, Bexhill on Sea; Carolyn Paul, Kiltearn Medical Centre, Cheshire; Wayne Turner, Burbage Surgery, Leicestershire; Tony Willis, Richford Gate Medical Practice, London. **USA:** Dennis Buth, Professional Research Network of Kansas LLC, Wichita; Leonard Chuck, Diablo Clinical Research, Inc. California; Rennee Dhillon, TN Medical Research, Tennessee; Howard Ellison, Rockdale Medical Research Associates, Georgia; Curtis Horn, Quality Research Incorporated, Texas; Michael Lillestol, Lillestol Research LLC, North Dakota; Jeffrey Pollock, Clinical Trial Research Associates, Inc. Florida; Steven Reynolds, Collaborative Neuroscience Network, LLC, California; Helena Rodbard, Endocrine And Metabolic Consultants, Maryland; Jay Adler, Clinicos, LLC, Colorado; Joseph Chehade, University of Florida, College of Medicine, Division of Endocrinology, Diabetes and Metabolism, Florida; Lisa Connery, LION Research, Oklahoma; Matthew Davis, Rochester Clinical Research, Inc. New York; Cara Dawson, Horizons Clinical Research Center, LLC, Colorado; Chi Ha, Gateway Research Center, California; John Lang, PMG Research of Raleigh, LLC, North Carolina; Barry Lubin, National Clinical Research-Norfolk, Inc, Virginia; J. Scott Overcash, eStudySite, California; Asif Qadri, Tri County Research, Inc., Georgia; Sharon Herring, Athens Gastroenterology Association, Georgia; Steven Kaster, Wenatchee Valley Hospital and Clinics, Washington; Robert Lending, Radiant Research Inc. – Arizona; Robert Lipetz, Encompass Clinical Research, California; Rajesh Patel, Lycoming Internal Medicine, Inc., Pennsylvania; Kenneth Rich, RAA-Apex Acquisition, LLC, California; Eric Wolfson, Independent Clinical Researchers @Wolfson Medical Center, Nevada; Serge Jabbour, Thomas Jefferson University Diabetes Research Center, Pennsylvania; Carl Meisner, Carl R. Meisner Medical Clinic, PLLC, Texas; Julio Rosenstock, Dallas Diabetes & Endocrine Center, Texas; Jose Suarez, Regenerate Clinical Trials, Florida; Mimi Van Der Leden, Chicago Research Center, Inc, Chicago; Heidi Kabler, eStudySite, Nevada; Robert McNeill, PMG Research of Salisbury, LLC, North Carolina; Gordon Wilhoit, Berkeley Family Practice, South Carolina; Anastasios Manassis, Gotham Cardiovascular Research, PC, New York; Ronald Caldwell, Clinical Study Center Of Asheville LLC, North Carolina; Richard Murphy, Humboldt Family Care Center, Tennessee; Kenneth Lasseter, Clinical Pharmacology of Miami, Inc., Florida; Kathleen Kelley, Biofortis Inc., Illinois; Daniel Donovan, Columbia University Medical Center, Weight Control Center, Columbia University Medical Center, New York; Pat Bass, Louisiana St. University Health Sci Center – Shreveport, Louisiana; Benny Barnhart, Grayline Research Center, Texas; David Bolshoun, Radiant Research Inc. – Denver, Colorado; Wilfredo Bravo, Clinical Research of Miami, Florida; Linda Harper, Clinical Neuroscience Solution, Florida; Arthur Mabaquiao, TriWest Research Associates, California; Letitia Thompson-Hargrave, Wells Institute For Health Awareness, Ohio; Kerri Wilks, MD Clinical, Florida.
